# Supplementary material for: A Draft De Novo Genome Assembly for the Northern Bobwhite (Colinus virginianus) Reveals Evidence for a Rapid Decline in Effective Population Size Beginning in the Late Pleistocene
Source: PLoS One. 2014 Mar 12;9(3):e90240. doi: 10.1371/journal.pone.0090240 (PMC3951200; doi:10.1371/journal.pone.0090240)
Supplement: Table S1 — NB1.0 Contig Map Positions in NB1.1. (XLSX) [file pone.0090240.s001.xlsx]

## Sheet: JoeNakedDeNovoLargeGapReadMappi
Table S1 NB1.0 Contig Map Positions in NB1.1
NB1.0 Contig ID	NB1.1 Contig ID	NB1.0 Contig Start Position in NB1.1
NorthernBobwhite_SimpleDeNovo_contig_41261	NorthernBobwhite_ScaffoldedDeNovo_contig_1	1
NorthernBobwhite_SimpleDeNovo_contig_1	NorthernBobwhite_ScaffoldedDeNovo_contig_1	2596
NorthernBobwhite_SimpleDeNovo_contig_2	NorthernBobwhite_ScaffoldedDeNovo_contig_2	1
NorthernBobwhite_SimpleDeNovo_contig_3	NorthernBobwhite_ScaffoldedDeNovo_contig_3	1
NorthernBobwhite_SimpleDeNovo_contig_352125	NorthernBobwhite_ScaffoldedDeNovo_contig_4	1
NorthernBobwhite_SimpleDeNovo_contig_4	NorthernBobwhite_ScaffoldedDeNovo_contig_4	285
NorthernBobwhite_SimpleDeNovo_contig_263784	NorthernBobwhite_ScaffoldedDeNovo_contig_5	1
NorthernBobwhite_SimpleDeNovo_contig_6	NorthernBobwhite_ScaffoldedDeNovo_contig_5	3478
NorthernBobwhite_SimpleDeNovo_contig_5	NorthernBobwhite_ScaffoldedDeNovo_contig_5	6958
NorthernBobwhite_SimpleDeNovo_contig_72227	NorthernBobwhite_ScaffoldedDeNovo_contig_5	12933
NorthernBobwhite_SimpleDeNovo_contig_89378	NorthernBobwhite_ScaffoldedDeNovo_contig_6	1
NorthernBobwhite_SimpleDeNovo_contig_251048	NorthernBobwhite_ScaffoldedDeNovo_contig_6	7334
NorthernBobwhite_SimpleDeNovo_contig_67787	NorthernBobwhite_ScaffoldedDeNovo_contig_6	9514
NorthernBobwhite_SimpleDeNovo_contig_115820	NorthernBobwhite_ScaffoldedDeNovo_contig_6	14756
NorthernBobwhite_SimpleDeNovo_contig_58153	NorthernBobwhite_ScaffoldedDeNovo_contig_6	39402
NorthernBobwhite_SimpleDeNovo_contig_114065	NorthernBobwhite_ScaffoldedDeNovo_contig_6	40619
NorthernBobwhite_SimpleDeNovo_contig_128344	NorthernBobwhite_ScaffoldedDeNovo_contig_6	46116
NorthernBobwhite_SimpleDeNovo_contig_71295	NorthernBobwhite_ScaffoldedDeNovo_contig_6	66681
NorthernBobwhite_SimpleDeNovo_contig_143009	NorthernBobwhite_ScaffoldedDeNovo_contig_6	73167
NorthernBobwhite_SimpleDeNovo_contig_143008	NorthernBobwhite_ScaffoldedDeNovo_contig_6	75321
NorthernBobwhite_SimpleDeNovo_contig_36322	NorthernBobwhite_ScaffoldedDeNovo_contig_6	78829
NorthernBobwhite_SimpleDeNovo_contig_132323	NorthernBobwhite_ScaffoldedDeNovo_contig_6	86852
NorthernBobwhite_SimpleDeNovo_contig_120233	NorthernBobwhite_ScaffoldedDeNovo_contig_6	90825
NorthernBobwhite_SimpleDeNovo_contig_120232	NorthernBobwhite_ScaffoldedDeNovo_contig_6	94139
NorthernBobwhite_SimpleDeNovo_contig_127715	NorthernBobwhite_ScaffoldedDeNovo_contig_6	109026
NorthernBobwhite_SimpleDeNovo_contig_180919	NorthernBobwhite_ScaffoldedDeNovo_contig_6	117053
NorthernBobwhite_SimpleDeNovo_contig_280598	NorthernBobwhite_ScaffoldedDeNovo_contig_6	122268
NorthernBobwhite_SimpleDeNovo_contig_180920	NorthernBobwhite_ScaffoldedDeNovo_contig_6	124095
NorthernBobwhite_SimpleDeNovo_contig_6791	NorthernBobwhite_ScaffoldedDeNovo_contig_6	125494
NorthernBobwhite_SimpleDeNovo_contig_244099	NorthernBobwhite_ScaffoldedDeNovo_contig_6	133931
NorthernBobwhite_SimpleDeNovo_contig_95127	NorthernBobwhite_ScaffoldedDeNovo_contig_6	136654
NorthernBobwhite_SimpleDeNovo_contig_245118	NorthernBobwhite_ScaffoldedDeNovo_contig_6	144595
NorthernBobwhite_SimpleDeNovo_contig_142830	NorthernBobwhite_ScaffoldedDeNovo_contig_6	147548
NorthernBobwhite_SimpleDeNovo_contig_108216	NorthernBobwhite_ScaffoldedDeNovo_contig_6	154495
NorthernBobwhite_SimpleDeNovo_contig_9	NorthernBobwhite_ScaffoldedDeNovo_contig_7	1
NorthernBobwhite_SimpleDeNovo_contig_224209	NorthernBobwhite_ScaffoldedDeNovo_contig_7	4066
NorthernBobwhite_SimpleDeNovo_contig_50666	NorthernBobwhite_ScaffoldedDeNovo_contig_8	1
NorthernBobwhite_SimpleDeNovo_contig_55037	NorthernBobwhite_ScaffoldedDeNovo_contig_8	5280
NorthernBobwhite_SimpleDeNovo_contig_216234	NorthernBobwhite_ScaffoldedDeNovo_contig_8	8145
NorthernBobwhite_SimpleDeNovo_contig_10	NorthernBobwhite_ScaffoldedDeNovo_contig_8	10139
NorthernBobwhite_SimpleDeNovo_contig_135040	NorthernBobwhite_ScaffoldedDeNovo_contig_8	20855
NorthernBobwhite_SimpleDeNovo_contig_269460	NorthernBobwhite_ScaffoldedDeNovo_contig_8	27391
NorthernBobwhite_SimpleDeNovo_contig_69326	NorthernBobwhite_ScaffoldedDeNovo_contig_8	50292
NorthernBobwhite_SimpleDeNovo_contig_60441	NorthernBobwhite_ScaffoldedDeNovo_contig_8	53245
NorthernBobwhite_SimpleDeNovo_contig_172008	NorthernBobwhite_ScaffoldedDeNovo_contig_8	58982
NorthernBobwhite_SimpleDeNovo_contig_172009	NorthernBobwhite_ScaffoldedDeNovo_contig_8	61313
NorthernBobwhite_SimpleDeNovo_contig_274866	NorthernBobwhite_ScaffoldedDeNovo_contig_8	64153
NorthernBobwhite_SimpleDeNovo_contig_215859	NorthernBobwhite_ScaffoldedDeNovo_contig_8	66873
NorthernBobwhite_SimpleDeNovo_contig_11	NorthernBobwhite_ScaffoldedDeNovo_contig_9	1
NorthernBobwhite_SimpleDeNovo_contig_169740	NorthernBobwhite_ScaffoldedDeNovo_contig_10	1
NorthernBobwhite_SimpleDeNovo_contig_13	NorthernBobwhite_ScaffoldedDeNovo_contig_10	2356
NorthernBobwhite_SimpleDeNovo_contig_126987	NorthernBobwhite_ScaffoldedDeNovo_contig_10	9952
NorthernBobwhite_SimpleDeNovo_contig_36099	NorthernBobwhite_ScaffoldedDeNovo_contig_10	11342
NorthernBobwhite_SimpleDeNovo_contig_277797	NorthernBobwhite_ScaffoldedDeNovo_contig_10	18093
NorthernBobwhite_SimpleDeNovo_contig_193791	NorthernBobwhite_ScaffoldedDeNovo_contig_10	19206
NorthernBobwhite_SimpleDeNovo_contig_90824	NorthernBobwhite_ScaffoldedDeNovo_contig_10	20373
NorthernBobwhite_SimpleDeNovo_contig_188695	NorthernBobwhite_ScaffoldedDeNovo_contig_10	27780
NorthernBobwhite_SimpleDeNovo_contig_144617	NorthernBobwhite_ScaffoldedDeNovo_contig_10	34228
NorthernBobwhite_SimpleDeNovo_contig_64108	NorthernBobwhite_ScaffoldedDeNovo_contig_11	7
NorthernBobwhite_SimpleDeNovo_contig_13779	NorthernBobwhite_ScaffoldedDeNovo_contig_11	5353
NorthernBobwhite_SimpleDeNovo_contig_187904	NorthernBobwhite_ScaffoldedDeNovo_contig_11	9173
NorthernBobwhite_SimpleDeNovo_contig_13780	NorthernBobwhite_ScaffoldedDeNovo_contig_11	10767
NorthernBobwhite_SimpleDeNovo_contig_31827	NorthernBobwhite_ScaffoldedDeNovo_contig_11	16001
NorthernBobwhite_SimpleDeNovo_contig_31826	NorthernBobwhite_ScaffoldedDeNovo_contig_11	21188
NorthernBobwhite_SimpleDeNovo_contig_163067	NorthernBobwhite_ScaffoldedDeNovo_contig_11	33970
NorthernBobwhite_SimpleDeNovo_contig_122487	NorthernBobwhite_ScaffoldedDeNovo_contig_11	61262
NorthernBobwhite_SimpleDeNovo_contig_196368	NorthernBobwhite_ScaffoldedDeNovo_contig_11	76080
NorthernBobwhite_SimpleDeNovo_contig_328837	NorthernBobwhite_ScaffoldedDeNovo_contig_11	77932
NorthernBobwhite_SimpleDeNovo_contig_147891	NorthernBobwhite_ScaffoldedDeNovo_contig_11	78538
NorthernBobwhite_SimpleDeNovo_contig_89975	NorthernBobwhite_ScaffoldedDeNovo_contig_11	81056
NorthernBobwhite_SimpleDeNovo_contig_121214	NorthernBobwhite_ScaffoldedDeNovo_contig_11	108428
NorthernBobwhite_SimpleDeNovo_contig_147370	NorthernBobwhite_ScaffoldedDeNovo_contig_11	113102
NorthernBobwhite_SimpleDeNovo_contig_249107	NorthernBobwhite_ScaffoldedDeNovo_contig_11	115441
NorthernBobwhite_SimpleDeNovo_contig_93994	NorthernBobwhite_ScaffoldedDeNovo_contig_11	118030
NorthernBobwhite_SimpleDeNovo_contig_212214	NorthernBobwhite_ScaffoldedDeNovo_contig_12	29202
NorthernBobwhite_SimpleDeNovo_contig_180958	NorthernBobwhite_ScaffoldedDeNovo_contig_12	68742
NorthernBobwhite_SimpleDeNovo_contig_20729	NorthernBobwhite_ScaffoldedDeNovo_contig_12	75061
NorthernBobwhite_SimpleDeNovo_contig_231408	NorthernBobwhite_ScaffoldedDeNovo_contig_13	1
NorthernBobwhite_SimpleDeNovo_contig_23747	NorthernBobwhite_ScaffoldedDeNovo_contig_13	14412
NorthernBobwhite_SimpleDeNovo_contig_27211	NorthernBobwhite_ScaffoldedDeNovo_contig_13	29102
NorthernBobwhite_SimpleDeNovo_contig_292492	NorthernBobwhite_ScaffoldedDeNovo_contig_13	37352
NorthernBobwhite_SimpleDeNovo_contig_172467	NorthernBobwhite_ScaffoldedDeNovo_contig_13	47968
NorthernBobwhite_SimpleDeNovo_contig_126917	NorthernBobwhite_ScaffoldedDeNovo_contig_13	51072
NorthernBobwhite_SimpleDeNovo_contig_17	NorthernBobwhite_ScaffoldedDeNovo_contig_14	1
NorthernBobwhite_SimpleDeNovo_contig_72872	NorthernBobwhite_ScaffoldedDeNovo_contig_14	7668
NorthernBobwhite_SimpleDeNovo_contig_72873	NorthernBobwhite_ScaffoldedDeNovo_contig_14	13259
NorthernBobwhite_SimpleDeNovo_contig_244059	NorthernBobwhite_ScaffoldedDeNovo_contig_14	18371
NorthernBobwhite_SimpleDeNovo_contig_38772	NorthernBobwhite_ScaffoldedDeNovo_contig_14	21507
NorthernBobwhite_SimpleDeNovo_contig_54370	NorthernBobwhite_ScaffoldedDeNovo_contig_14	22802
NorthernBobwhite_SimpleDeNovo_contig_15886	NorthernBobwhite_ScaffoldedDeNovo_contig_14	24974
NorthernBobwhite_SimpleDeNovo_contig_279822	NorthernBobwhite_ScaffoldedDeNovo_contig_14	30628
NorthernBobwhite_SimpleDeNovo_contig_108208	NorthernBobwhite_ScaffoldedDeNovo_contig_14	33306
NorthernBobwhite_SimpleDeNovo_contig_108209	NorthernBobwhite_ScaffoldedDeNovo_contig_14	36091
NorthernBobwhite_SimpleDeNovo_contig_50494	NorthernBobwhite_ScaffoldedDeNovo_contig_14	37944
NorthernBobwhite_SimpleDeNovo_contig_249968	NorthernBobwhite_ScaffoldedDeNovo_contig_14	44712
NorthernBobwhite_SimpleDeNovo_contig_113208	NorthernBobwhite_ScaffoldedDeNovo_contig_14	46508
NorthernBobwhite_SimpleDeNovo_contig_147193	NorthernBobwhite_ScaffoldedDeNovo_contig_14	49485
NorthernBobwhite_SimpleDeNovo_contig_75425	NorthernBobwhite_ScaffoldedDeNovo_contig_15	5224
NorthernBobwhite_SimpleDeNovo_contig_174672	NorthernBobwhite_ScaffoldedDeNovo_contig_15	12624
NorthernBobwhite_SimpleDeNovo_contig_199030	NorthernBobwhite_ScaffoldedDeNovo_contig_15	13676
NorthernBobwhite_SimpleDeNovo_contig_308411	NorthernBobwhite_ScaffoldedDeNovo_contig_15	14475
NorthernBobwhite_SimpleDeNovo_contig_48318	NorthernBobwhite_ScaffoldedDeNovo_contig_15	15060
NorthernBobwhite_SimpleDeNovo_contig_72477	NorthernBobwhite_ScaffoldedDeNovo_contig_15	21467
NorthernBobwhite_SimpleDeNovo_contig_253900	NorthernBobwhite_ScaffoldedDeNovo_contig_15	37562
NorthernBobwhite_SimpleDeNovo_contig_18	NorthernBobwhite_ScaffoldedDeNovo_contig_15	39170
NorthernBobwhite_SimpleDeNovo_contig_118891	NorthernBobwhite_ScaffoldedDeNovo_contig_15	43103
NorthernBobwhite_SimpleDeNovo_contig_185130	NorthernBobwhite_ScaffoldedDeNovo_contig_15	58467
NorthernBobwhite_SimpleDeNovo_contig_138917	NorthernBobwhite_ScaffoldedDeNovo_contig_17	1
NorthernBobwhite_SimpleDeNovo_contig_73418	NorthernBobwhite_ScaffoldedDeNovo_contig_17	5747
NorthernBobwhite_SimpleDeNovo_contig_203586	NorthernBobwhite_ScaffoldedDeNovo_contig_17	13156
NorthernBobwhite_SimpleDeNovo_contig_203587	NorthernBobwhite_ScaffoldedDeNovo_contig_17	14079
NorthernBobwhite_SimpleDeNovo_contig_90542	NorthernBobwhite_ScaffoldedDeNovo_contig_17	17440
NorthernBobwhite_SimpleDeNovo_contig_90543	NorthernBobwhite_ScaffoldedDeNovo_contig_17	20002
NorthernBobwhite_SimpleDeNovo_contig_154984	NorthernBobwhite_ScaffoldedDeNovo_contig_17	23634
NorthernBobwhite_SimpleDeNovo_contig_153719	NorthernBobwhite_ScaffoldedDeNovo_contig_17	32997
NorthernBobwhite_SimpleDeNovo_contig_206413	NorthernBobwhite_ScaffoldedDeNovo_contig_17	37273
NorthernBobwhite_SimpleDeNovo_contig_20	NorthernBobwhite_ScaffoldedDeNovo_contig_17	51855
NorthernBobwhite_SimpleDeNovo_contig_107526	NorthernBobwhite_ScaffoldedDeNovo_contig_18	1
NorthernBobwhite_SimpleDeNovo_contig_180852	NorthernBobwhite_ScaffoldedDeNovo_contig_18	25606
NorthernBobwhite_SimpleDeNovo_contig_208575	NorthernBobwhite_ScaffoldedDeNovo_contig_18	27991
NorthernBobwhite_SimpleDeNovo_contig_43415	NorthernBobwhite_ScaffoldedDeNovo_contig_18	31013
NorthernBobwhite_SimpleDeNovo_contig_156275	NorthernBobwhite_ScaffoldedDeNovo_contig_18	42431
NorthernBobwhite_SimpleDeNovo_contig_67944	NorthernBobwhite_ScaffoldedDeNovo_contig_18	54711
NorthernBobwhite_SimpleDeNovo_contig_67943	NorthernBobwhite_ScaffoldedDeNovo_contig_18	59273
NorthernBobwhite_SimpleDeNovo_contig_128175	NorthernBobwhite_ScaffoldedDeNovo_contig_18	64789
NorthernBobwhite_SimpleDeNovo_contig_27960	NorthernBobwhite_ScaffoldedDeNovo_contig_18	67965
NorthernBobwhite_SimpleDeNovo_contig_27961	NorthernBobwhite_ScaffoldedDeNovo_contig_18	73284
NorthernBobwhite_SimpleDeNovo_contig_191935	NorthernBobwhite_ScaffoldedDeNovo_contig_18	85829
NorthernBobwhite_SimpleDeNovo_contig_42433	NorthernBobwhite_ScaffoldedDeNovo_contig_18	107916
NorthernBobwhite_SimpleDeNovo_contig_227116	NorthernBobwhite_ScaffoldedDeNovo_contig_18	135466
NorthernBobwhite_SimpleDeNovo_contig_8530	NorthernBobwhite_ScaffoldedDeNovo_contig_18	137107
NorthernBobwhite_SimpleDeNovo_contig_12210	NorthernBobwhite_ScaffoldedDeNovo_contig_18	157411
NorthernBobwhite_SimpleDeNovo_contig_177308	NorthernBobwhite_ScaffoldedDeNovo_contig_18	160790
NorthernBobwhite_SimpleDeNovo_contig_52567	NorthernBobwhite_ScaffoldedDeNovo_contig_18	162870
NorthernBobwhite_SimpleDeNovo_contig_186153	NorthernBobwhite_ScaffoldedDeNovo_contig_18	169895
NorthernBobwhite_SimpleDeNovo_contig_87084	NorthernBobwhite_ScaffoldedDeNovo_contig_18	174323
NorthernBobwhite_SimpleDeNovo_contig_23141	NorthernBobwhite_ScaffoldedDeNovo_contig_18	177716
NorthernBobwhite_SimpleDeNovo_contig_234154	NorthernBobwhite_ScaffoldedDeNovo_contig_18	178712
NorthernBobwhite_SimpleDeNovo_contig_148525	NorthernBobwhite_ScaffoldedDeNovo_contig_18	181741
NorthernBobwhite_SimpleDeNovo_contig_22	NorthernBobwhite_ScaffoldedDeNovo_contig_19	1
NorthernBobwhite_SimpleDeNovo_contig_127596	NorthernBobwhite_ScaffoldedDeNovo_contig_20	1
NorthernBobwhite_SimpleDeNovo_contig_136535	NorthernBobwhite_ScaffoldedDeNovo_contig_20	17082
NorthernBobwhite_SimpleDeNovo_contig_110837	NorthernBobwhite_ScaffoldedDeNovo_contig_20	20182
NorthernBobwhite_SimpleDeNovo_contig_139917	NorthernBobwhite_ScaffoldedDeNovo_contig_20	27353
NorthernBobwhite_SimpleDeNovo_contig_135613	NorthernBobwhite_ScaffoldedDeNovo_contig_20	30615
NorthernBobwhite_SimpleDeNovo_contig_23	NorthernBobwhite_ScaffoldedDeNovo_contig_20	40050
NorthernBobwhite_SimpleDeNovo_contig_11458	NorthernBobwhite_ScaffoldedDeNovo_contig_20	41364
NorthernBobwhite_SimpleDeNovo_contig_12048	NorthernBobwhite_ScaffoldedDeNovo_contig_20	43635
NorthernBobwhite_SimpleDeNovo_contig_47264	NorthernBobwhite_ScaffoldedDeNovo_contig_20	47210
NorthernBobwhite_SimpleDeNovo_contig_4589	NorthernBobwhite_ScaffoldedDeNovo_contig_20	51196
NorthernBobwhite_SimpleDeNovo_contig_123148	NorthernBobwhite_ScaffoldedDeNovo_contig_20	58331
NorthernBobwhite_SimpleDeNovo_contig_166498	NorthernBobwhite_ScaffoldedDeNovo_contig_20	60246
NorthernBobwhite_SimpleDeNovo_contig_141169	NorthernBobwhite_ScaffoldedDeNovo_contig_20	73145
NorthernBobwhite_SimpleDeNovo_contig_24	NorthernBobwhite_ScaffoldedDeNovo_contig_21	1
NorthernBobwhite_SimpleDeNovo_contig_51768	NorthernBobwhite_ScaffoldedDeNovo_contig_22	1
NorthernBobwhite_SimpleDeNovo_contig_71248	NorthernBobwhite_ScaffoldedDeNovo_contig_22	12245
NorthernBobwhite_SimpleDeNovo_contig_222385	NorthernBobwhite_ScaffoldedDeNovo_contig_22	15984
NorthernBobwhite_SimpleDeNovo_contig_222384	NorthernBobwhite_ScaffoldedDeNovo_contig_22	18215
NorthernBobwhite_SimpleDeNovo_contig_216773	NorthernBobwhite_ScaffoldedDeNovo_contig_22	20182
NorthernBobwhite_SimpleDeNovo_contig_25	NorthernBobwhite_ScaffoldedDeNovo_contig_22	22739
NorthernBobwhite_SimpleDeNovo_contig_43209	NorthernBobwhite_ScaffoldedDeNovo_contig_23	1
NorthernBobwhite_SimpleDeNovo_contig_256729	NorthernBobwhite_ScaffoldedDeNovo_contig_23	3497
NorthernBobwhite_SimpleDeNovo_contig_280626	NorthernBobwhite_ScaffoldedDeNovo_contig_23	7106
NorthernBobwhite_SimpleDeNovo_contig_1845	NorthernBobwhite_ScaffoldedDeNovo_contig_23	8501
NorthernBobwhite_SimpleDeNovo_contig_1846	NorthernBobwhite_ScaffoldedDeNovo_contig_23	11671
NorthernBobwhite_SimpleDeNovo_contig_11394	NorthernBobwhite_ScaffoldedDeNovo_contig_23	16154
NorthernBobwhite_SimpleDeNovo_contig_11393	NorthernBobwhite_ScaffoldedDeNovo_contig_23	21476
NorthernBobwhite_SimpleDeNovo_contig_143175	NorthernBobwhite_ScaffoldedDeNovo_contig_23	24136
NorthernBobwhite_SimpleDeNovo_contig_83290	NorthernBobwhite_ScaffoldedDeNovo_contig_23	34318
NorthernBobwhite_SimpleDeNovo_contig_113738	NorthernBobwhite_ScaffoldedDeNovo_contig_23	40866
NorthernBobwhite_SimpleDeNovo_contig_320923	NorthernBobwhite_ScaffoldedDeNovo_contig_23	46417
NorthernBobwhite_SimpleDeNovo_contig_230109	NorthernBobwhite_ScaffoldedDeNovo_contig_23	46887
NorthernBobwhite_SimpleDeNovo_contig_264556	NorthernBobwhite_ScaffoldedDeNovo_contig_23	48640
NorthernBobwhite_SimpleDeNovo_contig_331104	NorthernBobwhite_ScaffoldedDeNovo_contig_23	48640
NorthernBobwhite_SimpleDeNovo_contig_114863	NorthernBobwhite_ScaffoldedDeNovo_contig_23	49101
NorthernBobwhite_SimpleDeNovo_contig_253880	NorthernBobwhite_ScaffoldedDeNovo_contig_23	56804
NorthernBobwhite_SimpleDeNovo_contig_271283	NorthernBobwhite_ScaffoldedDeNovo_contig_23	72756
NorthernBobwhite_SimpleDeNovo_contig_236114	NorthernBobwhite_ScaffoldedDeNovo_contig_23	73178
NorthernBobwhite_SimpleDeNovo_contig_34730	NorthernBobwhite_ScaffoldedDeNovo_contig_23	85132
NorthernBobwhite_SimpleDeNovo_contig_169915	NorthernBobwhite_ScaffoldedDeNovo_contig_23	87320
NorthernBobwhite_SimpleDeNovo_contig_213905	NorthernBobwhite_ScaffoldedDeNovo_contig_23	90005
NorthernBobwhite_SimpleDeNovo_contig_52004	NorthernBobwhite_ScaffoldedDeNovo_contig_23	92229
NorthernBobwhite_SimpleDeNovo_contig_123985	NorthernBobwhite_ScaffoldedDeNovo_contig_23	95707
NorthernBobwhite_SimpleDeNovo_contig_166949	NorthernBobwhite_ScaffoldedDeNovo_contig_23	98961
NorthernBobwhite_SimpleDeNovo_contig_274439	NorthernBobwhite_ScaffoldedDeNovo_contig_23	101157
NorthernBobwhite_SimpleDeNovo_contig_266648	NorthernBobwhite_ScaffoldedDeNovo_contig_24	10483
NorthernBobwhite_SimpleDeNovo_contig_186786	NorthernBobwhite_ScaffoldedDeNovo_contig_24	11942
NorthernBobwhite_SimpleDeNovo_contig_224930	NorthernBobwhite_ScaffoldedDeNovo_contig_24	13812
NorthernBobwhite_SimpleDeNovo_contig_86952	NorthernBobwhite_ScaffoldedDeNovo_contig_25	1
NorthernBobwhite_SimpleDeNovo_contig_190200	NorthernBobwhite_ScaffoldedDeNovo_contig_25	3266
NorthernBobwhite_SimpleDeNovo_contig_251729	NorthernBobwhite_ScaffoldedDeNovo_contig_25	7609
NorthernBobwhite_SimpleDeNovo_contig_160815	NorthernBobwhite_ScaffoldedDeNovo_contig_25	8452
NorthernBobwhite_SimpleDeNovo_contig_97061	NorthernBobwhite_ScaffoldedDeNovo_contig_25	10620
NorthernBobwhite_SimpleDeNovo_contig_183123	NorthernBobwhite_ScaffoldedDeNovo_contig_25	17132
NorthernBobwhite_SimpleDeNovo_contig_55631	NorthernBobwhite_ScaffoldedDeNovo_contig_25	23783
NorthernBobwhite_SimpleDeNovo_contig_195287	NorthernBobwhite_ScaffoldedDeNovo_contig_25	29689
NorthernBobwhite_SimpleDeNovo_contig_47170	NorthernBobwhite_ScaffoldedDeNovo_contig_25	31363
NorthernBobwhite_SimpleDeNovo_contig_4336	NorthernBobwhite_ScaffoldedDeNovo_contig_25	34232
NorthernBobwhite_SimpleDeNovo_contig_67090	NorthernBobwhite_ScaffoldedDeNovo_contig_25	38561
NorthernBobwhite_SimpleDeNovo_contig_135446	NorthernBobwhite_ScaffoldedDeNovo_contig_25	40381
NorthernBobwhite_SimpleDeNovo_contig_189898	NorthernBobwhite_ScaffoldedDeNovo_contig_25	43882
NorthernBobwhite_SimpleDeNovo_contig_28846	NorthernBobwhite_ScaffoldedDeNovo_contig_25	55674
NorthernBobwhite_SimpleDeNovo_contig_117959	NorthernBobwhite_ScaffoldedDeNovo_contig_26	1
NorthernBobwhite_SimpleDeNovo_contig_196628	NorthernBobwhite_ScaffoldedDeNovo_contig_26	13328
NorthernBobwhite_SimpleDeNovo_contig_221905	NorthernBobwhite_ScaffoldedDeNovo_contig_26	18306
NorthernBobwhite_SimpleDeNovo_contig_34616	NorthernBobwhite_ScaffoldedDeNovo_contig_26	25902
NorthernBobwhite_SimpleDeNovo_contig_82115	NorthernBobwhite_ScaffoldedDeNovo_contig_26	34559
NorthernBobwhite_SimpleDeNovo_contig_111899	NorthernBobwhite_ScaffoldedDeNovo_contig_26	39483
NorthernBobwhite_SimpleDeNovo_contig_56992	NorthernBobwhite_ScaffoldedDeNovo_contig_26	46748
NorthernBobwhite_SimpleDeNovo_contig_8364	NorthernBobwhite_ScaffoldedDeNovo_contig_26	53985
NorthernBobwhite_SimpleDeNovo_contig_60105	NorthernBobwhite_ScaffoldedDeNovo_contig_26	56378
NorthernBobwhite_SimpleDeNovo_contig_105277	NorthernBobwhite_ScaffoldedDeNovo_contig_26	76828
NorthernBobwhite_SimpleDeNovo_contig_246776	NorthernBobwhite_ScaffoldedDeNovo_contig_26	81295
NorthernBobwhite_SimpleDeNovo_contig_54814	NorthernBobwhite_ScaffoldedDeNovo_contig_26	84780
NorthernBobwhite_SimpleDeNovo_contig_96893	NorthernBobwhite_ScaffoldedDeNovo_contig_26	90089
NorthernBobwhite_SimpleDeNovo_contig_29	NorthernBobwhite_ScaffoldedDeNovo_contig_26	91334
NorthernBobwhite_SimpleDeNovo_contig_227667	NorthernBobwhite_ScaffoldedDeNovo_contig_26	96517
NorthernBobwhite_SimpleDeNovo_contig_257984	NorthernBobwhite_ScaffoldedDeNovo_contig_26	99264
NorthernBobwhite_SimpleDeNovo_contig_225353	NorthernBobwhite_ScaffoldedDeNovo_contig_26	105817
NorthernBobwhite_SimpleDeNovo_contig_172369	NorthernBobwhite_ScaffoldedDeNovo_contig_26	106683
NorthernBobwhite_SimpleDeNovo_contig_246096	NorthernBobwhite_ScaffoldedDeNovo_contig_26	118368
NorthernBobwhite_SimpleDeNovo_contig_30	NorthernBobwhite_ScaffoldedDeNovo_contig_27	1
NorthernBobwhite_SimpleDeNovo_contig_5028	NorthernBobwhite_ScaffoldedDeNovo_contig_28	1
NorthernBobwhite_SimpleDeNovo_contig_230390	NorthernBobwhite_ScaffoldedDeNovo_contig_28	702
NorthernBobwhite_SimpleDeNovo_contig_197953	NorthernBobwhite_ScaffoldedDeNovo_contig_28	792
NorthernBobwhite_SimpleDeNovo_contig_117941	NorthernBobwhite_ScaffoldedDeNovo_contig_29	1
NorthernBobwhite_SimpleDeNovo_contig_117942	NorthernBobwhite_ScaffoldedDeNovo_contig_29	1785
NorthernBobwhite_SimpleDeNovo_contig_182234	NorthernBobwhite_ScaffoldedDeNovo_contig_29	4581
NorthernBobwhite_SimpleDeNovo_contig_102880	NorthernBobwhite_ScaffoldedDeNovo_contig_29	15788
NorthernBobwhite_SimpleDeNovo_contig_118524	NorthernBobwhite_ScaffoldedDeNovo_contig_29	22166
NorthernBobwhite_SimpleDeNovo_contig_229696	NorthernBobwhite_ScaffoldedDeNovo_contig_29	27866
NorthernBobwhite_SimpleDeNovo_contig_172111	NorthernBobwhite_ScaffoldedDeNovo_contig_29	44377
NorthernBobwhite_SimpleDeNovo_contig_200273	NorthernBobwhite_ScaffoldedDeNovo_contig_29	47974
NorthernBobwhite_SimpleDeNovo_contig_68913	NorthernBobwhite_ScaffoldedDeNovo_contig_29	53042
NorthernBobwhite_SimpleDeNovo_contig_4300	NorthernBobwhite_ScaffoldedDeNovo_contig_29	66160
NorthernBobwhite_SimpleDeNovo_contig_169194	NorthernBobwhite_ScaffoldedDeNovo_contig_29	71722
NorthernBobwhite_SimpleDeNovo_contig_195810	NorthernBobwhite_ScaffoldedDeNovo_contig_29	77026
NorthernBobwhite_SimpleDeNovo_contig_34679	NorthernBobwhite_ScaffoldedDeNovo_contig_29	82925
NorthernBobwhite_SimpleDeNovo_contig_244948	NorthernBobwhite_ScaffoldedDeNovo_contig_29	88927
NorthernBobwhite_SimpleDeNovo_contig_264788	NorthernBobwhite_ScaffoldedDeNovo_contig_29	91062
NorthernBobwhite_SimpleDeNovo_contig_300422	NorthernBobwhite_ScaffoldedDeNovo_contig_29	93645
NorthernBobwhite_SimpleDeNovo_contig_238409	NorthernBobwhite_ScaffoldedDeNovo_contig_29	95319
NorthernBobwhite_SimpleDeNovo_contig_224799	NorthernBobwhite_ScaffoldedDeNovo_contig_29	101270
NorthernBobwhite_SimpleDeNovo_contig_233948	NorthernBobwhite_ScaffoldedDeNovo_contig_30	93497
NorthernBobwhite_SimpleDeNovo_contig_24995	NorthernBobwhite_ScaffoldedDeNovo_contig_30	115104
NorthernBobwhite_SimpleDeNovo_contig_190223	NorthernBobwhite_ScaffoldedDeNovo_contig_30	117839
NorthernBobwhite_SimpleDeNovo_contig_21844	NorthernBobwhite_ScaffoldedDeNovo_contig_30	121601
NorthernBobwhite_SimpleDeNovo_contig_241599	NorthernBobwhite_ScaffoldedDeNovo_contig_30	338138
NorthernBobwhite_SimpleDeNovo_contig_34050	NorthernBobwhite_ScaffoldedDeNovo_contig_30	420663
NorthernBobwhite_SimpleDeNovo_contig_106797	NorthernBobwhite_ScaffoldedDeNovo_contig_30	437411
NorthernBobwhite_SimpleDeNovo_contig_162478	NorthernBobwhite_ScaffoldedDeNovo_contig_31	1
NorthernBobwhite_SimpleDeNovo_contig_33	NorthernBobwhite_ScaffoldedDeNovo_contig_31	5301
NorthernBobwhite_SimpleDeNovo_contig_120879	NorthernBobwhite_ScaffoldedDeNovo_contig_31	8923
NorthernBobwhite_SimpleDeNovo_contig_9392	NorthernBobwhite_ScaffoldedDeNovo_contig_31	9957
NorthernBobwhite_SimpleDeNovo_contig_228358	NorthernBobwhite_ScaffoldedDeNovo_contig_32	1
NorthernBobwhite_SimpleDeNovo_contig_131759	NorthernBobwhite_ScaffoldedDeNovo_contig_32	4976
NorthernBobwhite_SimpleDeNovo_contig_113346	NorthernBobwhite_ScaffoldedDeNovo_contig_32	7622
NorthernBobwhite_SimpleDeNovo_contig_205382	NorthernBobwhite_ScaffoldedDeNovo_contig_32	11351
NorthernBobwhite_SimpleDeNovo_contig_137039	NorthernBobwhite_ScaffoldedDeNovo_contig_32	16161
NorthernBobwhite_SimpleDeNovo_contig_137040	NorthernBobwhite_ScaffoldedDeNovo_contig_32	20057
NorthernBobwhite_SimpleDeNovo_contig_34	NorthernBobwhite_ScaffoldedDeNovo_contig_32	23219
NorthernBobwhite_SimpleDeNovo_contig_178546	NorthernBobwhite_ScaffoldedDeNovo_contig_32	26537
NorthernBobwhite_SimpleDeNovo_contig_17990	NorthernBobwhite_ScaffoldedDeNovo_contig_32	28368
NorthernBobwhite_SimpleDeNovo_contig_146581	NorthernBobwhite_ScaffoldedDeNovo_contig_32	33881
NorthernBobwhite_SimpleDeNovo_contig_80463	NorthernBobwhite_ScaffoldedDeNovo_contig_32	36791
NorthernBobwhite_SimpleDeNovo_contig_285075	NorthernBobwhite_ScaffoldedDeNovo_contig_32	42409
NorthernBobwhite_SimpleDeNovo_contig_278878	NorthernBobwhite_ScaffoldedDeNovo_contig_32	46422
NorthernBobwhite_SimpleDeNovo_contig_35	NorthernBobwhite_ScaffoldedDeNovo_contig_33	1
NorthernBobwhite_SimpleDeNovo_contig_90367	NorthernBobwhite_ScaffoldedDeNovo_contig_33	8500
NorthernBobwhite_SimpleDeNovo_contig_150345	NorthernBobwhite_ScaffoldedDeNovo_contig_33	14726
NorthernBobwhite_SimpleDeNovo_contig_81611	NorthernBobwhite_ScaffoldedDeNovo_contig_33	17208
NorthernBobwhite_SimpleDeNovo_contig_78999	NorthernBobwhite_ScaffoldedDeNovo_contig_33	32603
NorthernBobwhite_SimpleDeNovo_contig_91804	NorthernBobwhite_ScaffoldedDeNovo_contig_33	35809
NorthernBobwhite_SimpleDeNovo_contig_50145	NorthernBobwhite_ScaffoldedDeNovo_contig_33	38300
NorthernBobwhite_SimpleDeNovo_contig_278728	NorthernBobwhite_ScaffoldedDeNovo_contig_34	1
NorthernBobwhite_SimpleDeNovo_contig_108124	NorthernBobwhite_ScaffoldedDeNovo_contig_34	894
NorthernBobwhite_SimpleDeNovo_contig_194226	NorthernBobwhite_ScaffoldedDeNovo_contig_34	14511
NorthernBobwhite_SimpleDeNovo_contig_37	NorthernBobwhite_ScaffoldedDeNovo_contig_35	1
NorthernBobwhite_SimpleDeNovo_contig_98179	NorthernBobwhite_ScaffoldedDeNovo_contig_35	2532
NorthernBobwhite_SimpleDeNovo_contig_89360	NorthernBobwhite_ScaffoldedDeNovo_contig_35	4545
NorthernBobwhite_SimpleDeNovo_contig_128051	NorthernBobwhite_ScaffoldedDeNovo_contig_35	6683
NorthernBobwhite_SimpleDeNovo_contig_56435	NorthernBobwhite_ScaffoldedDeNovo_contig_35	14792
NorthernBobwhite_SimpleDeNovo_contig_81433	NorthernBobwhite_ScaffoldedDeNovo_contig_35	22181
NorthernBobwhite_SimpleDeNovo_contig_60588	NorthernBobwhite_ScaffoldedDeNovo_contig_35	28936
NorthernBobwhite_SimpleDeNovo_contig_35251	NorthernBobwhite_ScaffoldedDeNovo_contig_35	32361
NorthernBobwhite_SimpleDeNovo_contig_29560	NorthernBobwhite_ScaffoldedDeNovo_contig_35	38311
NorthernBobwhite_SimpleDeNovo_contig_19909	NorthernBobwhite_ScaffoldedDeNovo_contig_35	54423
NorthernBobwhite_SimpleDeNovo_contig_53566	NorthernBobwhite_ScaffoldedDeNovo_contig_35	59644
NorthernBobwhite_SimpleDeNovo_contig_149298	NorthernBobwhite_ScaffoldedDeNovo_contig_35	65680
NorthernBobwhite_SimpleDeNovo_contig_73820	NorthernBobwhite_ScaffoldedDeNovo_contig_35	70361
NorthernBobwhite_SimpleDeNovo_contig_200907	NorthernBobwhite_ScaffoldedDeNovo_contig_35	75185
NorthernBobwhite_SimpleDeNovo_contig_98386	NorthernBobwhite_ScaffoldedDeNovo_contig_35	77815
NorthernBobwhite_SimpleDeNovo_contig_290195	NorthernBobwhite_ScaffoldedDeNovo_contig_35	84355
NorthernBobwhite_SimpleDeNovo_contig_148142	NorthernBobwhite_ScaffoldedDeNovo_contig_35	94849
NorthernBobwhite_SimpleDeNovo_contig_148141	NorthernBobwhite_ScaffoldedDeNovo_contig_35	97600
NorthernBobwhite_SimpleDeNovo_contig_73160	NorthernBobwhite_ScaffoldedDeNovo_contig_35	105314
NorthernBobwhite_SimpleDeNovo_contig_48960	NorthernBobwhite_ScaffoldedDeNovo_contig_35	140970
NorthernBobwhite_SimpleDeNovo_contig_104537	NorthernBobwhite_ScaffoldedDeNovo_contig_35	148158
NorthernBobwhite_SimpleDeNovo_contig_229926	NorthernBobwhite_ScaffoldedDeNovo_contig_35	150438
NorthernBobwhite_SimpleDeNovo_contig_75208	NorthernBobwhite_ScaffoldedDeNovo_contig_35	151595
NorthernBobwhite_SimpleDeNovo_contig_163459	NorthernBobwhite_ScaffoldedDeNovo_contig_35	168749
NorthernBobwhite_SimpleDeNovo_contig_177896	NorthernBobwhite_ScaffoldedDeNovo_contig_35	172779
NorthernBobwhite_SimpleDeNovo_contig_34075	NorthernBobwhite_ScaffoldedDeNovo_contig_36	1
NorthernBobwhite_SimpleDeNovo_contig_38	NorthernBobwhite_ScaffoldedDeNovo_contig_36	3687
NorthernBobwhite_SimpleDeNovo_contig_127192	NorthernBobwhite_ScaffoldedDeNovo_contig_36	5823
NorthernBobwhite_SimpleDeNovo_contig_165778	NorthernBobwhite_ScaffoldedDeNovo_contig_36	10400
NorthernBobwhite_SimpleDeNovo_contig_105309	NorthernBobwhite_ScaffoldedDeNovo_contig_36	13443
NorthernBobwhite_SimpleDeNovo_contig_50059	NorthernBobwhite_ScaffoldedDeNovo_contig_36	15789
NorthernBobwhite_SimpleDeNovo_contig_23710	NorthernBobwhite_ScaffoldedDeNovo_contig_36	17665
NorthernBobwhite_SimpleDeNovo_contig_23711	NorthernBobwhite_ScaffoldedDeNovo_contig_36	21749
NorthernBobwhite_SimpleDeNovo_contig_70146	NorthernBobwhite_ScaffoldedDeNovo_contig_38	1
NorthernBobwhite_SimpleDeNovo_contig_40	NorthernBobwhite_ScaffoldedDeNovo_contig_38	1269
NorthernBobwhite_SimpleDeNovo_contig_177322	NorthernBobwhite_ScaffoldedDeNovo_contig_39	1
NorthernBobwhite_SimpleDeNovo_contig_127937	NorthernBobwhite_ScaffoldedDeNovo_contig_39	1995
NorthernBobwhite_SimpleDeNovo_contig_212465	NorthernBobwhite_ScaffoldedDeNovo_contig_39	8914
NorthernBobwhite_SimpleDeNovo_contig_112970	NorthernBobwhite_ScaffoldedDeNovo_contig_39	13064
NorthernBobwhite_SimpleDeNovo_contig_224660	NorthernBobwhite_ScaffoldedDeNovo_contig_39	15383
NorthernBobwhite_SimpleDeNovo_contig_232906	NorthernBobwhite_ScaffoldedDeNovo_contig_39	16285
NorthernBobwhite_SimpleDeNovo_contig_106577	NorthernBobwhite_ScaffoldedDeNovo_contig_39	19294
NorthernBobwhite_SimpleDeNovo_contig_64957	NorthernBobwhite_ScaffoldedDeNovo_contig_39	21301
NorthernBobwhite_SimpleDeNovo_contig_194506	NorthernBobwhite_ScaffoldedDeNovo_contig_39	36648
NorthernBobwhite_SimpleDeNovo_contig_206417	NorthernBobwhite_ScaffoldedDeNovo_contig_39	39872
NorthernBobwhite_SimpleDeNovo_contig_34599	NorthernBobwhite_ScaffoldedDeNovo_contig_39	42412
NorthernBobwhite_SimpleDeNovo_contig_95689	NorthernBobwhite_ScaffoldedDeNovo_contig_39	45664
NorthernBobwhite_SimpleDeNovo_contig_160598	NorthernBobwhite_ScaffoldedDeNovo_contig_39	48483
NorthernBobwhite_SimpleDeNovo_contig_189037	NorthernBobwhite_ScaffoldedDeNovo_contig_39	90687
NorthernBobwhite_SimpleDeNovo_contig_189038	NorthernBobwhite_ScaffoldedDeNovo_contig_39	94086
NorthernBobwhite_SimpleDeNovo_contig_231899	NorthernBobwhite_ScaffoldedDeNovo_contig_39	98326
NorthernBobwhite_SimpleDeNovo_contig_13295	NorthernBobwhite_ScaffoldedDeNovo_contig_39	111329
NorthernBobwhite_SimpleDeNovo_contig_198511	NorthernBobwhite_ScaffoldedDeNovo_contig_39	118150
NorthernBobwhite_SimpleDeNovo_contig_129409	NorthernBobwhite_ScaffoldedDeNovo_contig_39	135480
NorthernBobwhite_SimpleDeNovo_contig_119652	NorthernBobwhite_ScaffoldedDeNovo_contig_39	141069
NorthernBobwhite_SimpleDeNovo_contig_119612	NorthernBobwhite_ScaffoldedDeNovo_contig_39	148431
NorthernBobwhite_SimpleDeNovo_contig_127539	NorthernBobwhite_ScaffoldedDeNovo_contig_39	153474
NorthernBobwhite_SimpleDeNovo_contig_37656	NorthernBobwhite_ScaffoldedDeNovo_contig_40	1
NorthernBobwhite_SimpleDeNovo_contig_46	NorthernBobwhite_ScaffoldedDeNovo_contig_40	4614
NorthernBobwhite_SimpleDeNovo_contig_159274	NorthernBobwhite_ScaffoldedDeNovo_contig_40	11540
NorthernBobwhite_SimpleDeNovo_contig_225661	NorthernBobwhite_ScaffoldedDeNovo_contig_41	1
NorthernBobwhite_SimpleDeNovo_contig_229846	NorthernBobwhite_ScaffoldedDeNovo_contig_41	27395
NorthernBobwhite_SimpleDeNovo_contig_138409	NorthernBobwhite_ScaffoldedDeNovo_contig_41	40068
NorthernBobwhite_SimpleDeNovo_contig_288650	NorthernBobwhite_ScaffoldedDeNovo_contig_41	41199
NorthernBobwhite_SimpleDeNovo_contig_47	NorthernBobwhite_ScaffoldedDeNovo_contig_41	43346
NorthernBobwhite_SimpleDeNovo_contig_116160	NorthernBobwhite_ScaffoldedDeNovo_contig_41	48926
NorthernBobwhite_SimpleDeNovo_contig_86	NorthernBobwhite_ScaffoldedDeNovo_contig_43	1
NorthernBobwhite_SimpleDeNovo_contig_87	NorthernBobwhite_ScaffoldedDeNovo_contig_44	1
NorthernBobwhite_SimpleDeNovo_contig_163908	NorthernBobwhite_ScaffoldedDeNovo_contig_44	5377
NorthernBobwhite_SimpleDeNovo_contig_297308	NorthernBobwhite_ScaffoldedDeNovo_contig_45	2618
NorthernBobwhite_SimpleDeNovo_contig_311667	NorthernBobwhite_ScaffoldedDeNovo_contig_45	53456
NorthernBobwhite_SimpleDeNovo_contig_315256	NorthernBobwhite_ScaffoldedDeNovo_contig_45	54714
NorthernBobwhite_SimpleDeNovo_contig_306622	NorthernBobwhite_ScaffoldedDeNovo_contig_45	224805
NorthernBobwhite_SimpleDeNovo_contig_140126	NorthernBobwhite_ScaffoldedDeNovo_contig_45	227063
NorthernBobwhite_SimpleDeNovo_contig_46522	NorthernBobwhite_ScaffoldedDeNovo_contig_45	229511
NorthernBobwhite_SimpleDeNovo_contig_219676	NorthernBobwhite_ScaffoldedDeNovo_contig_45	236549
NorthernBobwhite_SimpleDeNovo_contig_496	NorthernBobwhite_ScaffoldedDeNovo_contig_45	238849
NorthernBobwhite_SimpleDeNovo_contig_71003	NorthernBobwhite_ScaffoldedDeNovo_contig_45	244412
NorthernBobwhite_SimpleDeNovo_contig_230485	NorthernBobwhite_ScaffoldedDeNovo_contig_45	337516
NorthernBobwhite_SimpleDeNovo_contig_72381	NorthernBobwhite_ScaffoldedDeNovo_contig_45	370957
NorthernBobwhite_SimpleDeNovo_contig_39189	NorthernBobwhite_ScaffoldedDeNovo_contig_45	382314
NorthernBobwhite_SimpleDeNovo_contig_236950	NorthernBobwhite_ScaffoldedDeNovo_contig_45	387760
NorthernBobwhite_SimpleDeNovo_contig_254262	NorthernBobwhite_ScaffoldedDeNovo_contig_45	388816
NorthernBobwhite_SimpleDeNovo_contig_186058	NorthernBobwhite_ScaffoldedDeNovo_contig_45	404150
NorthernBobwhite_SimpleDeNovo_contig_258567	NorthernBobwhite_ScaffoldedDeNovo_contig_45	418136
NorthernBobwhite_SimpleDeNovo_contig_88	NorthernBobwhite_ScaffoldedDeNovo_contig_45	461728
NorthernBobwhite_SimpleDeNovo_contig_43493	NorthernBobwhite_ScaffoldedDeNovo_contig_45	466980
NorthernBobwhite_SimpleDeNovo_contig_157599	NorthernBobwhite_ScaffoldedDeNovo_contig_45	468655
NorthernBobwhite_SimpleDeNovo_contig_10211	NorthernBobwhite_ScaffoldedDeNovo_contig_45	479049
NorthernBobwhite_SimpleDeNovo_contig_182277	NorthernBobwhite_ScaffoldedDeNovo_contig_45	508910
NorthernBobwhite_SimpleDeNovo_contig_57708	NorthernBobwhite_ScaffoldedDeNovo_contig_45	516025
NorthernBobwhite_SimpleDeNovo_contig_146553	NorthernBobwhite_ScaffoldedDeNovo_contig_46	20
NorthernBobwhite_SimpleDeNovo_contig_210193	NorthernBobwhite_ScaffoldedDeNovo_contig_46	25034
NorthernBobwhite_SimpleDeNovo_contig_210194	NorthernBobwhite_ScaffoldedDeNovo_contig_46	27384
NorthernBobwhite_SimpleDeNovo_contig_231807	NorthernBobwhite_ScaffoldedDeNovo_contig_46	30082
NorthernBobwhite_SimpleDeNovo_contig_131599	NorthernBobwhite_ScaffoldedDeNovo_contig_46	35221
NorthernBobwhite_SimpleDeNovo_contig_89	NorthernBobwhite_ScaffoldedDeNovo_contig_46	42941
NorthernBobwhite_SimpleDeNovo_contig_88824	NorthernBobwhite_ScaffoldedDeNovo_contig_46	68281
NorthernBobwhite_SimpleDeNovo_contig_256515	NorthernBobwhite_ScaffoldedDeNovo_contig_47	56
NorthernBobwhite_SimpleDeNovo_contig_90	NorthernBobwhite_ScaffoldedDeNovo_contig_47	1553
NorthernBobwhite_SimpleDeNovo_contig_159423	NorthernBobwhite_ScaffoldedDeNovo_contig_47	5835
NorthernBobwhite_SimpleDeNovo_contig_190983	NorthernBobwhite_ScaffoldedDeNovo_contig_47	8845
NorthernBobwhite_SimpleDeNovo_contig_274982	NorthernBobwhite_ScaffoldedDeNovo_contig_48	185
NorthernBobwhite_SimpleDeNovo_contig_308557	NorthernBobwhite_ScaffoldedDeNovo_contig_48	185
NorthernBobwhite_SimpleDeNovo_contig_49323	NorthernBobwhite_ScaffoldedDeNovo_contig_48	9862
NorthernBobwhite_SimpleDeNovo_contig_107789	NorthernBobwhite_ScaffoldedDeNovo_contig_48	12371
NorthernBobwhite_SimpleDeNovo_contig_89886	NorthernBobwhite_ScaffoldedDeNovo_contig_48	31702
NorthernBobwhite_SimpleDeNovo_contig_92	NorthernBobwhite_ScaffoldedDeNovo_contig_49	1
NorthernBobwhite_SimpleDeNovo_contig_118905	NorthernBobwhite_ScaffoldedDeNovo_contig_50	1
NorthernBobwhite_SimpleDeNovo_contig_99053	NorthernBobwhite_ScaffoldedDeNovo_contig_50	17458
NorthernBobwhite_SimpleDeNovo_contig_59	NorthernBobwhite_ScaffoldedDeNovo_contig_51	1
NorthernBobwhite_SimpleDeNovo_contig_37485	NorthernBobwhite_ScaffoldedDeNovo_contig_52	1
NorthernBobwhite_SimpleDeNovo_contig_38968	NorthernBobwhite_ScaffoldedDeNovo_contig_52	4635
NorthernBobwhite_SimpleDeNovo_contig_103561	NorthernBobwhite_ScaffoldedDeNovo_contig_52	12775
NorthernBobwhite_SimpleDeNovo_contig_57056	NorthernBobwhite_ScaffoldedDeNovo_contig_52	15825
NorthernBobwhite_SimpleDeNovo_contig_146558	NorthernBobwhite_ScaffoldedDeNovo_contig_52	21122
NorthernBobwhite_SimpleDeNovo_contig_196806	NorthernBobwhite_ScaffoldedDeNovo_contig_52	23724
NorthernBobwhite_SimpleDeNovo_contig_284922	NorthernBobwhite_ScaffoldedDeNovo_contig_52	26886
NorthernBobwhite_SimpleDeNovo_contig_96659	NorthernBobwhite_ScaffoldedDeNovo_contig_52	28672
NorthernBobwhite_SimpleDeNovo_contig_76668	NorthernBobwhite_ScaffoldedDeNovo_contig_52	37359
NorthernBobwhite_SimpleDeNovo_contig_10803	NorthernBobwhite_ScaffoldedDeNovo_contig_52	39819
NorthernBobwhite_SimpleDeNovo_contig_3504	NorthernBobwhite_ScaffoldedDeNovo_contig_52	42688
NorthernBobwhite_SimpleDeNovo_contig_50117	NorthernBobwhite_ScaffoldedDeNovo_contig_52	49375
NorthernBobwhite_SimpleDeNovo_contig_131209	NorthernBobwhite_ScaffoldedDeNovo_contig_52	54573
NorthernBobwhite_SimpleDeNovo_contig_203029	NorthernBobwhite_ScaffoldedDeNovo_contig_52	57616
NorthernBobwhite_SimpleDeNovo_contig_130129	NorthernBobwhite_ScaffoldedDeNovo_contig_52	60438
NorthernBobwhite_SimpleDeNovo_contig_27031	NorthernBobwhite_ScaffoldedDeNovo_contig_52	87133
NorthernBobwhite_SimpleDeNovo_contig_193265	NorthernBobwhite_ScaffoldedDeNovo_contig_52	94190
NorthernBobwhite_SimpleDeNovo_contig_101483	NorthernBobwhite_ScaffoldedDeNovo_contig_52	96601
NorthernBobwhite_SimpleDeNovo_contig_57008	NorthernBobwhite_ScaffoldedDeNovo_contig_52	103355
NorthernBobwhite_SimpleDeNovo_contig_214735	NorthernBobwhite_ScaffoldedDeNovo_contig_53	1
NorthernBobwhite_SimpleDeNovo_contig_234590	NorthernBobwhite_ScaffoldedDeNovo_contig_53	2518
NorthernBobwhite_SimpleDeNovo_contig_110013	NorthernBobwhite_ScaffoldedDeNovo_contig_53	30259
NorthernBobwhite_SimpleDeNovo_contig_106227	NorthernBobwhite_ScaffoldedDeNovo_contig_53	32246
NorthernBobwhite_SimpleDeNovo_contig_309308	NorthernBobwhite_ScaffoldedDeNovo_contig_53	35425
NorthernBobwhite_SimpleDeNovo_contig_63003	NorthernBobwhite_ScaffoldedDeNovo_contig_53	70265
NorthernBobwhite_SimpleDeNovo_contig_332433	NorthernBobwhite_ScaffoldedDeNovo_contig_53	74455
NorthernBobwhite_SimpleDeNovo_contig_105719	NorthernBobwhite_ScaffoldedDeNovo_contig_53	75942
NorthernBobwhite_SimpleDeNovo_contig_59607	NorthernBobwhite_ScaffoldedDeNovo_contig_53	80260
NorthernBobwhite_SimpleDeNovo_contig_239017	NorthernBobwhite_ScaffoldedDeNovo_contig_53	87806
NorthernBobwhite_SimpleDeNovo_contig_18653	NorthernBobwhite_ScaffoldedDeNovo_contig_53	94660
NorthernBobwhite_SimpleDeNovo_contig_18652	NorthernBobwhite_ScaffoldedDeNovo_contig_53	102906
NorthernBobwhite_SimpleDeNovo_contig_177220	NorthernBobwhite_ScaffoldedDeNovo_contig_53	123179
NorthernBobwhite_SimpleDeNovo_contig_249834	NorthernBobwhite_ScaffoldedDeNovo_contig_53	150910
NorthernBobwhite_SimpleDeNovo_contig_95565	NorthernBobwhite_ScaffoldedDeNovo_contig_53	153301
NorthernBobwhite_SimpleDeNovo_contig_48	NorthernBobwhite_ScaffoldedDeNovo_contig_53	161479
NorthernBobwhite_SimpleDeNovo_contig_162764	NorthernBobwhite_ScaffoldedDeNovo_contig_53	168585
NorthernBobwhite_SimpleDeNovo_contig_49	NorthernBobwhite_ScaffoldedDeNovo_contig_54	1
NorthernBobwhite_SimpleDeNovo_contig_50	NorthernBobwhite_ScaffoldedDeNovo_contig_55	1
NorthernBobwhite_SimpleDeNovo_contig_52	NorthernBobwhite_ScaffoldedDeNovo_contig_56	1
NorthernBobwhite_SimpleDeNovo_contig_51	NorthernBobwhite_ScaffoldedDeNovo_contig_56	3244
NorthernBobwhite_SimpleDeNovo_contig_3063	NorthernBobwhite_ScaffoldedDeNovo_contig_56	5074
NorthernBobwhite_SimpleDeNovo_contig_409	NorthernBobwhite_ScaffoldedDeNovo_contig_57	1
NorthernBobwhite_SimpleDeNovo_contig_120730	NorthernBobwhite_ScaffoldedDeNovo_contig_58	1
NorthernBobwhite_SimpleDeNovo_contig_47976	NorthernBobwhite_ScaffoldedDeNovo_contig_58	2349
NorthernBobwhite_SimpleDeNovo_contig_47975	NorthernBobwhite_ScaffoldedDeNovo_contig_58	4874
NorthernBobwhite_SimpleDeNovo_contig_34169	NorthernBobwhite_ScaffoldedDeNovo_contig_58	8883
NorthernBobwhite_SimpleDeNovo_contig_410	NorthernBobwhite_ScaffoldedDeNovo_contig_58	14673
NorthernBobwhite_SimpleDeNovo_contig_95076	NorthernBobwhite_ScaffoldedDeNovo_contig_58	19753
NorthernBobwhite_SimpleDeNovo_contig_257232	NorthernBobwhite_ScaffoldedDeNovo_contig_58	21787
NorthernBobwhite_SimpleDeNovo_contig_15681	NorthernBobwhite_ScaffoldedDeNovo_contig_60	25183
NorthernBobwhite_SimpleDeNovo_contig_15680	NorthernBobwhite_ScaffoldedDeNovo_contig_60	30946
NorthernBobwhite_SimpleDeNovo_contig_123774	NorthernBobwhite_ScaffoldedDeNovo_contig_60	38525
NorthernBobwhite_SimpleDeNovo_contig_40192	NorthernBobwhite_ScaffoldedDeNovo_contig_60	44301
NorthernBobwhite_SimpleDeNovo_contig_40191	NorthernBobwhite_ScaffoldedDeNovo_contig_60	51739
NorthernBobwhite_SimpleDeNovo_contig_182028	NorthernBobwhite_ScaffoldedDeNovo_contig_60	89339
NorthernBobwhite_SimpleDeNovo_contig_126522	NorthernBobwhite_ScaffoldedDeNovo_contig_61	1
NorthernBobwhite_SimpleDeNovo_contig_197312	NorthernBobwhite_ScaffoldedDeNovo_contig_61	8333
NorthernBobwhite_SimpleDeNovo_contig_109725	NorthernBobwhite_ScaffoldedDeNovo_contig_61	30511
NorthernBobwhite_SimpleDeNovo_contig_121201	NorthernBobwhite_ScaffoldedDeNovo_contig_61	32601
NorthernBobwhite_SimpleDeNovo_contig_11723	NorthernBobwhite_ScaffoldedDeNovo_contig_61	46403
NorthernBobwhite_SimpleDeNovo_contig_67971	NorthernBobwhite_ScaffoldedDeNovo_contig_61	48533
NorthernBobwhite_SimpleDeNovo_contig_73	NorthernBobwhite_ScaffoldedDeNovo_contig_61	50998
NorthernBobwhite_SimpleDeNovo_contig_72	NorthernBobwhite_ScaffoldedDeNovo_contig_61	53247
NorthernBobwhite_SimpleDeNovo_contig_158939	NorthernBobwhite_ScaffoldedDeNovo_contig_61	55982
NorthernBobwhite_SimpleDeNovo_contig_320746	NorthernBobwhite_ScaffoldedDeNovo_contig_61	58640
NorthernBobwhite_SimpleDeNovo_contig_147101	NorthernBobwhite_ScaffoldedDeNovo_contig_61	68326
NorthernBobwhite_SimpleDeNovo_contig_187096	NorthernBobwhite_ScaffoldedDeNovo_contig_61	74141
NorthernBobwhite_SimpleDeNovo_contig_125733	NorthernBobwhite_ScaffoldedDeNovo_contig_61	76113
NorthernBobwhite_SimpleDeNovo_contig_137237	NorthernBobwhite_ScaffoldedDeNovo_contig_61	77967
NorthernBobwhite_SimpleDeNovo_contig_14451	NorthernBobwhite_ScaffoldedDeNovo_contig_61	84312
NorthernBobwhite_SimpleDeNovo_contig_32012	NorthernBobwhite_ScaffoldedDeNovo_contig_61	88369
NorthernBobwhite_SimpleDeNovo_contig_173743	NorthernBobwhite_ScaffoldedDeNovo_contig_61	91746
NorthernBobwhite_SimpleDeNovo_contig_55889	NorthernBobwhite_ScaffoldedDeNovo_contig_61	99136
NorthernBobwhite_SimpleDeNovo_contig_18296	NorthernBobwhite_ScaffoldedDeNovo_contig_61	104930
NorthernBobwhite_SimpleDeNovo_contig_33936	NorthernBobwhite_ScaffoldedDeNovo_contig_61	112906
NorthernBobwhite_SimpleDeNovo_contig_135908	NorthernBobwhite_ScaffoldedDeNovo_contig_61	115772
NorthernBobwhite_SimpleDeNovo_contig_233320	NorthernBobwhite_ScaffoldedDeNovo_contig_61	118451
NorthernBobwhite_SimpleDeNovo_contig_90478	NorthernBobwhite_ScaffoldedDeNovo_contig_61	120250
NorthernBobwhite_SimpleDeNovo_contig_90479	NorthernBobwhite_ScaffoldedDeNovo_contig_61	123758
NorthernBobwhite_SimpleDeNovo_contig_120162	NorthernBobwhite_ScaffoldedDeNovo_contig_61	126371
NorthernBobwhite_SimpleDeNovo_contig_92752	NorthernBobwhite_ScaffoldedDeNovo_contig_61	129108
NorthernBobwhite_SimpleDeNovo_contig_173194	NorthernBobwhite_ScaffoldedDeNovo_contig_61	131680
NorthernBobwhite_SimpleDeNovo_contig_252313	NorthernBobwhite_ScaffoldedDeNovo_contig_61	135019
NorthernBobwhite_SimpleDeNovo_contig_98368	NorthernBobwhite_ScaffoldedDeNovo_contig_61	136151
NorthernBobwhite_SimpleDeNovo_contig_18230	NorthernBobwhite_ScaffoldedDeNovo_contig_61	153505
NorthernBobwhite_SimpleDeNovo_contig_126683	NorthernBobwhite_ScaffoldedDeNovo_contig_61	172706
NorthernBobwhite_SimpleDeNovo_contig_74	NorthernBobwhite_ScaffoldedDeNovo_contig_62	1
NorthernBobwhite_SimpleDeNovo_contig_67825	NorthernBobwhite_ScaffoldedDeNovo_contig_62	8115
NorthernBobwhite_SimpleDeNovo_contig_187269	NorthernBobwhite_ScaffoldedDeNovo_contig_62	10369
NorthernBobwhite_SimpleDeNovo_contig_145026	NorthernBobwhite_ScaffoldedDeNovo_contig_62	12219
NorthernBobwhite_SimpleDeNovo_contig_119397	NorthernBobwhite_ScaffoldedDeNovo_contig_62	14528
NorthernBobwhite_SimpleDeNovo_contig_75	NorthernBobwhite_ScaffoldedDeNovo_contig_63	1
NorthernBobwhite_SimpleDeNovo_contig_77	NorthernBobwhite_ScaffoldedDeNovo_contig_64	8605
NorthernBobwhite_SimpleDeNovo_contig_99782	NorthernBobwhite_ScaffoldedDeNovo_contig_64	12280
NorthernBobwhite_SimpleDeNovo_contig_217531	NorthernBobwhite_ScaffoldedDeNovo_contig_64	13811
NorthernBobwhite_SimpleDeNovo_contig_338372	NorthernBobwhite_ScaffoldedDeNovo_contig_64	13811
NorthernBobwhite_SimpleDeNovo_contig_226033	NorthernBobwhite_ScaffoldedDeNovo_contig_64	14261
NorthernBobwhite_SimpleDeNovo_contig_120591	NorthernBobwhite_ScaffoldedDeNovo_contig_64	16902
NorthernBobwhite_SimpleDeNovo_contig_280703	NorthernBobwhite_ScaffoldedDeNovo_contig_64	24923
NorthernBobwhite_SimpleDeNovo_contig_260238	NorthernBobwhite_ScaffoldedDeNovo_contig_65	1
NorthernBobwhite_SimpleDeNovo_contig_183820	NorthernBobwhite_ScaffoldedDeNovo_contig_65	1915
NorthernBobwhite_SimpleDeNovo_contig_6488	NorthernBobwhite_ScaffoldedDeNovo_contig_65	3578
NorthernBobwhite_SimpleDeNovo_contig_99478	NorthernBobwhite_ScaffoldedDeNovo_contig_65	19190
NorthernBobwhite_SimpleDeNovo_contig_116016	NorthernBobwhite_ScaffoldedDeNovo_contig_65	27401
NorthernBobwhite_SimpleDeNovo_contig_103193	NorthernBobwhite_ScaffoldedDeNovo_contig_65	30928
NorthernBobwhite_SimpleDeNovo_contig_183862	NorthernBobwhite_ScaffoldedDeNovo_contig_65	33694
NorthernBobwhite_SimpleDeNovo_contig_274627	NorthernBobwhite_ScaffoldedDeNovo_contig_65	38295
NorthernBobwhite_SimpleDeNovo_contig_186264	NorthernBobwhite_ScaffoldedDeNovo_contig_65	55737
NorthernBobwhite_SimpleDeNovo_contig_79	NorthernBobwhite_ScaffoldedDeNovo_contig_66	1
NorthernBobwhite_SimpleDeNovo_contig_181684	NorthernBobwhite_ScaffoldedDeNovo_contig_68	1
NorthernBobwhite_SimpleDeNovo_contig_158022	NorthernBobwhite_ScaffoldedDeNovo_contig_68	1011
NorthernBobwhite_SimpleDeNovo_contig_343227	NorthernBobwhite_ScaffoldedDeNovo_contig_68	4655
NorthernBobwhite_SimpleDeNovo_contig_358581	NorthernBobwhite_ScaffoldedDeNovo_contig_68	4655
NorthernBobwhite_SimpleDeNovo_contig_132952	NorthernBobwhite_ScaffoldedDeNovo_contig_68	4946
NorthernBobwhite_SimpleDeNovo_contig_92030	NorthernBobwhite_ScaffoldedDeNovo_contig_68	7147
NorthernBobwhite_SimpleDeNovo_contig_248284	NorthernBobwhite_ScaffoldedDeNovo_contig_68	13134
NorthernBobwhite_SimpleDeNovo_contig_150264	NorthernBobwhite_ScaffoldedDeNovo_contig_68	13619
NorthernBobwhite_SimpleDeNovo_contig_150263	NorthernBobwhite_ScaffoldedDeNovo_contig_68	17610
NorthernBobwhite_SimpleDeNovo_contig_115813	NorthernBobwhite_ScaffoldedDeNovo_contig_68	18978
NorthernBobwhite_SimpleDeNovo_contig_89856	NorthernBobwhite_ScaffoldedDeNovo_contig_68	43587
NorthernBobwhite_SimpleDeNovo_contig_82	NorthernBobwhite_ScaffoldedDeNovo_contig_68	46130
NorthernBobwhite_SimpleDeNovo_contig_81	NorthernBobwhite_ScaffoldedDeNovo_contig_68	47809
NorthernBobwhite_SimpleDeNovo_contig_84	NorthernBobwhite_ScaffoldedDeNovo_contig_69	1
NorthernBobwhite_SimpleDeNovo_contig_83	NorthernBobwhite_ScaffoldedDeNovo_contig_69	3731
NorthernBobwhite_SimpleDeNovo_contig_43936	NorthernBobwhite_ScaffoldedDeNovo_contig_70	1
NorthernBobwhite_SimpleDeNovo_contig_113326	NorthernBobwhite_ScaffoldedDeNovo_contig_70	1806
NorthernBobwhite_SimpleDeNovo_contig_6285	NorthernBobwhite_ScaffoldedDeNovo_contig_70	7979
NorthernBobwhite_SimpleDeNovo_contig_115795	NorthernBobwhite_ScaffoldedDeNovo_contig_70	24952
NorthernBobwhite_SimpleDeNovo_contig_64788	NorthernBobwhite_ScaffoldedDeNovo_contig_70	27702
NorthernBobwhite_SimpleDeNovo_contig_67059	NorthernBobwhite_ScaffoldedDeNovo_contig_70	29601
NorthernBobwhite_SimpleDeNovo_contig_145998	NorthernBobwhite_ScaffoldedDeNovo_contig_70	35649
NorthernBobwhite_SimpleDeNovo_contig_67058	NorthernBobwhite_ScaffoldedDeNovo_contig_70	37189
NorthernBobwhite_SimpleDeNovo_contig_102242	NorthernBobwhite_ScaffoldedDeNovo_contig_70	43039
NorthernBobwhite_SimpleDeNovo_contig_141975	NorthernBobwhite_ScaffoldedDeNovo_contig_70	47511
NorthernBobwhite_SimpleDeNovo_contig_37538	NorthernBobwhite_ScaffoldedDeNovo_contig_70	50763
NorthernBobwhite_SimpleDeNovo_contig_165524	NorthernBobwhite_ScaffoldedDeNovo_contig_71	1
NorthernBobwhite_SimpleDeNovo_contig_154067	NorthernBobwhite_ScaffoldedDeNovo_contig_71	2433
NorthernBobwhite_SimpleDeNovo_contig_131915	NorthernBobwhite_ScaffoldedDeNovo_contig_71	24752
NorthernBobwhite_SimpleDeNovo_contig_224378	NorthernBobwhite_ScaffoldedDeNovo_contig_71	30108
NorthernBobwhite_SimpleDeNovo_contig_239335	NorthernBobwhite_ScaffoldedDeNovo_contig_71	31401
NorthernBobwhite_SimpleDeNovo_contig_19757	NorthernBobwhite_ScaffoldedDeNovo_contig_71	33928
NorthernBobwhite_SimpleDeNovo_contig_130389	NorthernBobwhite_ScaffoldedDeNovo_contig_71	53479
NorthernBobwhite_SimpleDeNovo_contig_225196	NorthernBobwhite_ScaffoldedDeNovo_contig_71	57376
NorthernBobwhite_SimpleDeNovo_contig_262075	NorthernBobwhite_ScaffoldedDeNovo_contig_71	71497
NorthernBobwhite_SimpleDeNovo_contig_143707	NorthernBobwhite_ScaffoldedDeNovo_contig_71	97015
NorthernBobwhite_SimpleDeNovo_contig_143706	NorthernBobwhite_ScaffoldedDeNovo_contig_71	101434
NorthernBobwhite_SimpleDeNovo_contig_187988	NorthernBobwhite_ScaffoldedDeNovo_contig_71	113929
NorthernBobwhite_SimpleDeNovo_contig_191716	NorthernBobwhite_ScaffoldedDeNovo_contig_71	118431
NorthernBobwhite_SimpleDeNovo_contig_207507	NorthernBobwhite_ScaffoldedDeNovo_contig_71	123843
NorthernBobwhite_SimpleDeNovo_contig_94104	NorthernBobwhite_ScaffoldedDeNovo_contig_71	125321
NorthernBobwhite_SimpleDeNovo_contig_123176	NorthernBobwhite_ScaffoldedDeNovo_contig_71	131883
NorthernBobwhite_SimpleDeNovo_contig_252893	NorthernBobwhite_ScaffoldedDeNovo_contig_71	137125
NorthernBobwhite_SimpleDeNovo_contig_335186	NorthernBobwhite_ScaffoldedDeNovo_contig_71	137125
NorthernBobwhite_SimpleDeNovo_contig_8848	NorthernBobwhite_ScaffoldedDeNovo_contig_71	137409
NorthernBobwhite_SimpleDeNovo_contig_102912	NorthernBobwhite_ScaffoldedDeNovo_contig_71	143104
NorthernBobwhite_SimpleDeNovo_contig_206851	NorthernBobwhite_ScaffoldedDeNovo_contig_71	146901
NorthernBobwhite_SimpleDeNovo_contig_87457	NorthernBobwhite_ScaffoldedDeNovo_contig_71	152350
NorthernBobwhite_SimpleDeNovo_contig_286887	NorthernBobwhite_ScaffoldedDeNovo_contig_71	180349
NorthernBobwhite_SimpleDeNovo_contig_111712	NorthernBobwhite_ScaffoldedDeNovo_contig_71	181039
NorthernBobwhite_SimpleDeNovo_contig_111711	NorthernBobwhite_ScaffoldedDeNovo_contig_71	185090
NorthernBobwhite_SimpleDeNovo_contig_205408	NorthernBobwhite_ScaffoldedDeNovo_contig_71	187667
NorthernBobwhite_SimpleDeNovo_contig_175402	NorthernBobwhite_ScaffoldedDeNovo_contig_71	204717
NorthernBobwhite_SimpleDeNovo_contig_42	NorthernBobwhite_ScaffoldedDeNovo_contig_72	1
NorthernBobwhite_SimpleDeNovo_contig_53	NorthernBobwhite_ScaffoldedDeNovo_contig_73	1
NorthernBobwhite_SimpleDeNovo_contig_220147	NorthernBobwhite_ScaffoldedDeNovo_contig_74	1
NorthernBobwhite_SimpleDeNovo_contig_184895	NorthernBobwhite_ScaffoldedDeNovo_contig_74	2434
NorthernBobwhite_SimpleDeNovo_contig_161795	NorthernBobwhite_ScaffoldedDeNovo_contig_74	7650
NorthernBobwhite_SimpleDeNovo_contig_274502	NorthernBobwhite_ScaffoldedDeNovo_contig_74	14338
NorthernBobwhite_SimpleDeNovo_contig_142049	NorthernBobwhite_ScaffoldedDeNovo_contig_74	15862
NorthernBobwhite_SimpleDeNovo_contig_152549	NorthernBobwhite_ScaffoldedDeNovo_contig_74	20686
NorthernBobwhite_SimpleDeNovo_contig_55	NorthernBobwhite_ScaffoldedDeNovo_contig_74	27912
NorthernBobwhite_SimpleDeNovo_contig_54	NorthernBobwhite_ScaffoldedDeNovo_contig_74	30368
NorthernBobwhite_SimpleDeNovo_contig_170999	NorthernBobwhite_ScaffoldedDeNovo_contig_74	36833
NorthernBobwhite_SimpleDeNovo_contig_161391	NorthernBobwhite_ScaffoldedDeNovo_contig_75	1
NorthernBobwhite_SimpleDeNovo_contig_207490	NorthernBobwhite_ScaffoldedDeNovo_contig_75	2039
NorthernBobwhite_SimpleDeNovo_contig_56	NorthernBobwhite_ScaffoldedDeNovo_contig_75	16362
NorthernBobwhite_SimpleDeNovo_contig_247693	NorthernBobwhite_ScaffoldedDeNovo_contig_75	23887
NorthernBobwhite_SimpleDeNovo_contig_419	NorthernBobwhite_ScaffoldedDeNovo_contig_76	1
NorthernBobwhite_SimpleDeNovo_contig_129195	NorthernBobwhite_ScaffoldedDeNovo_contig_77	1
NorthernBobwhite_SimpleDeNovo_contig_156470	NorthernBobwhite_ScaffoldedDeNovo_contig_77	49773
NorthernBobwhite_SimpleDeNovo_contig_93118	NorthernBobwhite_ScaffoldedDeNovo_contig_78	14598
NorthernBobwhite_SimpleDeNovo_contig_198350	NorthernBobwhite_ScaffoldedDeNovo_contig_78	17901
NorthernBobwhite_SimpleDeNovo_contig_173014	NorthernBobwhite_ScaffoldedDeNovo_contig_79	1
NorthernBobwhite_SimpleDeNovo_contig_45842	NorthernBobwhite_ScaffoldedDeNovo_contig_79	22070
NorthernBobwhite_SimpleDeNovo_contig_257389	NorthernBobwhite_ScaffoldedDeNovo_contig_79	24231
NorthernBobwhite_SimpleDeNovo_contig_277963	NorthernBobwhite_ScaffoldedDeNovo_contig_79	24231
NorthernBobwhite_SimpleDeNovo_contig_45843	NorthernBobwhite_ScaffoldedDeNovo_contig_79	24548
NorthernBobwhite_SimpleDeNovo_contig_423	NorthernBobwhite_ScaffoldedDeNovo_contig_79	26862
NorthernBobwhite_SimpleDeNovo_contig_422	NorthernBobwhite_ScaffoldedDeNovo_contig_79	29584
NorthernBobwhite_SimpleDeNovo_contig_145193	NorthernBobwhite_ScaffoldedDeNovo_contig_79	31661
NorthernBobwhite_SimpleDeNovo_contig_123117	NorthernBobwhite_ScaffoldedDeNovo_contig_79	37416
NorthernBobwhite_SimpleDeNovo_contig_166307	NorthernBobwhite_ScaffoldedDeNovo_contig_79	39165
NorthernBobwhite_SimpleDeNovo_contig_186609	NorthernBobwhite_ScaffoldedDeNovo_contig_79	42997
NorthernBobwhite_SimpleDeNovo_contig_38831	NorthernBobwhite_ScaffoldedDeNovo_contig_80	1
NorthernBobwhite_SimpleDeNovo_contig_92703	NorthernBobwhite_ScaffoldedDeNovo_contig_81	1
NorthernBobwhite_SimpleDeNovo_contig_225905	NorthernBobwhite_ScaffoldedDeNovo_contig_81	4658
NorthernBobwhite_SimpleDeNovo_contig_166624	NorthernBobwhite_ScaffoldedDeNovo_contig_81	8380
NorthernBobwhite_SimpleDeNovo_contig_61449	NorthernBobwhite_ScaffoldedDeNovo_contig_81	27189
NorthernBobwhite_SimpleDeNovo_contig_105227	NorthernBobwhite_ScaffoldedDeNovo_contig_81	29507
NorthernBobwhite_SimpleDeNovo_contig_27405	NorthernBobwhite_ScaffoldedDeNovo_contig_81	52162
NorthernBobwhite_SimpleDeNovo_contig_129297	NorthernBobwhite_ScaffoldedDeNovo_contig_81	55368
NorthernBobwhite_SimpleDeNovo_contig_241552	NorthernBobwhite_ScaffoldedDeNovo_contig_81	73622
NorthernBobwhite_SimpleDeNovo_contig_133841	NorthernBobwhite_ScaffoldedDeNovo_contig_81	74106
NorthernBobwhite_SimpleDeNovo_contig_319614	NorthernBobwhite_ScaffoldedDeNovo_contig_81	74526
NorthernBobwhite_SimpleDeNovo_contig_100447	NorthernBobwhite_ScaffoldedDeNovo_contig_81	74812
NorthernBobwhite_SimpleDeNovo_contig_344187	NorthernBobwhite_ScaffoldedDeNovo_contig_81	75512
NorthernBobwhite_SimpleDeNovo_contig_164477	NorthernBobwhite_ScaffoldedDeNovo_contig_81	77992
NorthernBobwhite_SimpleDeNovo_contig_176458	NorthernBobwhite_ScaffoldedDeNovo_contig_81	80497
NorthernBobwhite_SimpleDeNovo_contig_79833	NorthernBobwhite_ScaffoldedDeNovo_contig_81	92544
NorthernBobwhite_SimpleDeNovo_contig_255745	NorthernBobwhite_ScaffoldedDeNovo_contig_81	95831
NorthernBobwhite_SimpleDeNovo_contig_16079	NorthernBobwhite_ScaffoldedDeNovo_contig_81	96449
NorthernBobwhite_SimpleDeNovo_contig_248822	NorthernBobwhite_ScaffoldedDeNovo_contig_81	97646
NorthernBobwhite_SimpleDeNovo_contig_107749	NorthernBobwhite_ScaffoldedDeNovo_contig_81	99382
NorthernBobwhite_SimpleDeNovo_contig_112667	NorthernBobwhite_ScaffoldedDeNovo_contig_82	1
NorthernBobwhite_SimpleDeNovo_contig_99768	NorthernBobwhite_ScaffoldedDeNovo_contig_82	2827
NorthernBobwhite_SimpleDeNovo_contig_83379	NorthernBobwhite_ScaffoldedDeNovo_contig_82	46686
NorthernBobwhite_SimpleDeNovo_contig_208187	NorthernBobwhite_ScaffoldedDeNovo_contig_82	53234
NorthernBobwhite_SimpleDeNovo_contig_80347	NorthernBobwhite_ScaffoldedDeNovo_contig_82	57494
NorthernBobwhite_SimpleDeNovo_contig_221064	NorthernBobwhite_ScaffoldedDeNovo_contig_82	143370
NorthernBobwhite_SimpleDeNovo_contig_189719	NorthernBobwhite_ScaffoldedDeNovo_contig_82	166047
NorthernBobwhite_SimpleDeNovo_contig_124185	NorthernBobwhite_ScaffoldedDeNovo_contig_82	292350
NorthernBobwhite_SimpleDeNovo_contig_71978	NorthernBobwhite_ScaffoldedDeNovo_contig_83	1
NorthernBobwhite_SimpleDeNovo_contig_253578	NorthernBobwhite_ScaffoldedDeNovo_contig_83	15566
NorthernBobwhite_SimpleDeNovo_contig_140495	NorthernBobwhite_ScaffoldedDeNovo_contig_83	18736
NorthernBobwhite_SimpleDeNovo_contig_28892	NorthernBobwhite_ScaffoldedDeNovo_contig_83	26589
NorthernBobwhite_SimpleDeNovo_contig_282033	NorthernBobwhite_ScaffoldedDeNovo_contig_83	65941
NorthernBobwhite_SimpleDeNovo_contig_153562	NorthernBobwhite_ScaffoldedDeNovo_contig_83	87794
NorthernBobwhite_SimpleDeNovo_contig_213351	NorthernBobwhite_ScaffoldedDeNovo_contig_84	10314
NorthernBobwhite_SimpleDeNovo_contig_5455	NorthernBobwhite_ScaffoldedDeNovo_contig_84	13609
NorthernBobwhite_SimpleDeNovo_contig_170390	NorthernBobwhite_ScaffoldedDeNovo_contig_84	17314
NorthernBobwhite_SimpleDeNovo_contig_97581	NorthernBobwhite_ScaffoldedDeNovo_contig_84	18613
NorthernBobwhite_SimpleDeNovo_contig_180175	NorthernBobwhite_ScaffoldedDeNovo_contig_84	34587
NorthernBobwhite_SimpleDeNovo_contig_166803	NorthernBobwhite_ScaffoldedDeNovo_contig_84	39278
NorthernBobwhite_SimpleDeNovo_contig_105372	NorthernBobwhite_ScaffoldedDeNovo_contig_84	41493
NorthernBobwhite_SimpleDeNovo_contig_36264	NorthernBobwhite_ScaffoldedDeNovo_contig_84	43535
NorthernBobwhite_SimpleDeNovo_contig_166019	NorthernBobwhite_ScaffoldedDeNovo_contig_84	48134
NorthernBobwhite_SimpleDeNovo_contig_165862	NorthernBobwhite_ScaffoldedDeNovo_contig_84	49183
NorthernBobwhite_SimpleDeNovo_contig_46632	NorthernBobwhite_ScaffoldedDeNovo_contig_84	51925
NorthernBobwhite_SimpleDeNovo_contig_65	NorthernBobwhite_ScaffoldedDeNovo_contig_84	56894
NorthernBobwhite_SimpleDeNovo_contig_89709	NorthernBobwhite_ScaffoldedDeNovo_contig_84	61584
NorthernBobwhite_SimpleDeNovo_contig_279158	NorthernBobwhite_ScaffoldedDeNovo_contig_84	80380
NorthernBobwhite_SimpleDeNovo_contig_116962	NorthernBobwhite_ScaffoldedDeNovo_contig_85	1
NorthernBobwhite_SimpleDeNovo_contig_101348	NorthernBobwhite_ScaffoldedDeNovo_contig_85	4633
NorthernBobwhite_SimpleDeNovo_contig_228717	NorthernBobwhite_ScaffoldedDeNovo_contig_85	4633
NorthernBobwhite_SimpleDeNovo_contig_67	NorthernBobwhite_ScaffoldedDeNovo_contig_85	5188
NorthernBobwhite_SimpleDeNovo_contig_66	NorthernBobwhite_ScaffoldedDeNovo_contig_85	8487
NorthernBobwhite_SimpleDeNovo_contig_154899	NorthernBobwhite_ScaffoldedDeNovo_contig_85	15029
NorthernBobwhite_SimpleDeNovo_contig_196261	NorthernBobwhite_ScaffoldedDeNovo_contig_85	19268
NorthernBobwhite_SimpleDeNovo_contig_84790	NorthernBobwhite_ScaffoldedDeNovo_contig_85	21286
NorthernBobwhite_SimpleDeNovo_contig_19296	NorthernBobwhite_ScaffoldedDeNovo_contig_85	23852
NorthernBobwhite_SimpleDeNovo_contig_59693	NorthernBobwhite_ScaffoldedDeNovo_contig_85	28885
NorthernBobwhite_SimpleDeNovo_contig_60764	NorthernBobwhite_ScaffoldedDeNovo_contig_85	32293
NorthernBobwhite_SimpleDeNovo_contig_153198	NorthernBobwhite_ScaffoldedDeNovo_contig_85	35569
NorthernBobwhite_SimpleDeNovo_contig_209484	NorthernBobwhite_ScaffoldedDeNovo_contig_86	1
NorthernBobwhite_SimpleDeNovo_contig_43367	NorthernBobwhite_ScaffoldedDeNovo_contig_86	3726
NorthernBobwhite_SimpleDeNovo_contig_237808	NorthernBobwhite_ScaffoldedDeNovo_contig_86	7894
NorthernBobwhite_SimpleDeNovo_contig_155975	NorthernBobwhite_ScaffoldedDeNovo_contig_86	49430
NorthernBobwhite_SimpleDeNovo_contig_224434	NorthernBobwhite_ScaffoldedDeNovo_contig_86	52488
NorthernBobwhite_SimpleDeNovo_contig_99560	NorthernBobwhite_ScaffoldedDeNovo_contig_86	78085
NorthernBobwhite_SimpleDeNovo_contig_38677	NorthernBobwhite_ScaffoldedDeNovo_contig_86	82739
NorthernBobwhite_SimpleDeNovo_contig_8681	NorthernBobwhite_ScaffoldedDeNovo_contig_87	340
NorthernBobwhite_SimpleDeNovo_contig_132414	NorthernBobwhite_ScaffoldedDeNovo_contig_87	3498
NorthernBobwhite_SimpleDeNovo_contig_201099	NorthernBobwhite_ScaffoldedDeNovo_contig_87	7133
NorthernBobwhite_SimpleDeNovo_contig_69	NorthernBobwhite_ScaffoldedDeNovo_contig_87	9871
NorthernBobwhite_SimpleDeNovo_contig_3814	NorthernBobwhite_ScaffoldedDeNovo_contig_88	1
NorthernBobwhite_SimpleDeNovo_contig_89560	NorthernBobwhite_ScaffoldedDeNovo_contig_88	1633
NorthernBobwhite_SimpleDeNovo_contig_70	NorthernBobwhite_ScaffoldedDeNovo_contig_88	5636
NorthernBobwhite_SimpleDeNovo_contig_100852	NorthernBobwhite_ScaffoldedDeNovo_contig_88	6924
NorthernBobwhite_SimpleDeNovo_contig_157195	NorthernBobwhite_ScaffoldedDeNovo_contig_88	10475
NorthernBobwhite_SimpleDeNovo_contig_8080	NorthernBobwhite_ScaffoldedDeNovo_contig_88	12399
NorthernBobwhite_SimpleDeNovo_contig_251585	NorthernBobwhite_ScaffoldedDeNovo_contig_89	1
NorthernBobwhite_SimpleDeNovo_contig_309298	NorthernBobwhite_ScaffoldedDeNovo_contig_89	1581
NorthernBobwhite_SimpleDeNovo_contig_336388	NorthernBobwhite_ScaffoldedDeNovo_contig_89	1582
NorthernBobwhite_SimpleDeNovo_contig_151227	NorthernBobwhite_ScaffoldedDeNovo_contig_89	1912
NorthernBobwhite_SimpleDeNovo_contig_192819	NorthernBobwhite_ScaffoldedDeNovo_contig_89	13661
NorthernBobwhite_SimpleDeNovo_contig_156889	NorthernBobwhite_ScaffoldedDeNovo_contig_89	16552
NorthernBobwhite_SimpleDeNovo_contig_123329	NorthernBobwhite_ScaffoldedDeNovo_contig_89	19759
NorthernBobwhite_SimpleDeNovo_contig_71	NorthernBobwhite_ScaffoldedDeNovo_contig_89	20781
NorthernBobwhite_SimpleDeNovo_contig_237217	NorthernBobwhite_ScaffoldedDeNovo_contig_89	29557
NorthernBobwhite_SimpleDeNovo_contig_229061	NorthernBobwhite_ScaffoldedDeNovo_contig_89	36650
NorthernBobwhite_SimpleDeNovo_contig_141551	NorthernBobwhite_ScaffoldedDeNovo_contig_89	38740
NorthernBobwhite_SimpleDeNovo_contig_148294	NorthernBobwhite_ScaffoldedDeNovo_contig_89	41174
NorthernBobwhite_SimpleDeNovo_contig_8893	NorthernBobwhite_ScaffoldedDeNovo_contig_89	47189
NorthernBobwhite_SimpleDeNovo_contig_217950	NorthernBobwhite_ScaffoldedDeNovo_contig_89	53545
NorthernBobwhite_SimpleDeNovo_contig_299944	NorthernBobwhite_ScaffoldedDeNovo_contig_89	60305
NorthernBobwhite_SimpleDeNovo_contig_161789	NorthernBobwhite_ScaffoldedDeNovo_contig_89	72757
NorthernBobwhite_SimpleDeNovo_contig_40761	NorthernBobwhite_ScaffoldedDeNovo_contig_89	76334
NorthernBobwhite_SimpleDeNovo_contig_52245	NorthernBobwhite_ScaffoldedDeNovo_contig_89	79910
NorthernBobwhite_SimpleDeNovo_contig_84028	NorthernBobwhite_ScaffoldedDeNovo_contig_89	82589
NorthernBobwhite_SimpleDeNovo_contig_139433	NorthernBobwhite_ScaffoldedDeNovo_contig_90	4
NorthernBobwhite_SimpleDeNovo_contig_231768	NorthernBobwhite_ScaffoldedDeNovo_contig_90	7733
NorthernBobwhite_SimpleDeNovo_contig_126099	NorthernBobwhite_ScaffoldedDeNovo_contig_90	9279
NorthernBobwhite_SimpleDeNovo_contig_177706	NorthernBobwhite_ScaffoldedDeNovo_contig_90	12023
NorthernBobwhite_SimpleDeNovo_contig_126992	NorthernBobwhite_ScaffoldedDeNovo_contig_90	16387
NorthernBobwhite_SimpleDeNovo_contig_210357	NorthernBobwhite_ScaffoldedDeNovo_contig_90	20432
NorthernBobwhite_SimpleDeNovo_contig_300703	NorthernBobwhite_ScaffoldedDeNovo_contig_90	45740
NorthernBobwhite_SimpleDeNovo_contig_180018	NorthernBobwhite_ScaffoldedDeNovo_contig_90	47795
NorthernBobwhite_SimpleDeNovo_contig_164740	NorthernBobwhite_ScaffoldedDeNovo_contig_90	49235
NorthernBobwhite_SimpleDeNovo_contig_154703	NorthernBobwhite_ScaffoldedDeNovo_contig_90	110710
NorthernBobwhite_SimpleDeNovo_contig_6074	NorthernBobwhite_ScaffoldedDeNovo_contig_90	114832
NorthernBobwhite_SimpleDeNovo_contig_161070	NorthernBobwhite_ScaffoldedDeNovo_contig_90	130799
NorthernBobwhite_SimpleDeNovo_contig_164631	NorthernBobwhite_ScaffoldedDeNovo_contig_90	133557
NorthernBobwhite_SimpleDeNovo_contig_35279	NorthernBobwhite_ScaffoldedDeNovo_contig_90	135819
NorthernBobwhite_SimpleDeNovo_contig_160574	NorthernBobwhite_ScaffoldedDeNovo_contig_90	137732
NorthernBobwhite_SimpleDeNovo_contig_73379	NorthernBobwhite_ScaffoldedDeNovo_contig_90	140206
NorthernBobwhite_SimpleDeNovo_contig_2738	NorthernBobwhite_ScaffoldedDeNovo_contig_90	142000
NorthernBobwhite_SimpleDeNovo_contig_31061	NorthernBobwhite_ScaffoldedDeNovo_contig_90	148198
NorthernBobwhite_SimpleDeNovo_contig_139496	NorthernBobwhite_ScaffoldedDeNovo_contig_90	152289
NorthernBobwhite_SimpleDeNovo_contig_91573	NorthernBobwhite_ScaffoldedDeNovo_contig_90	156521
NorthernBobwhite_SimpleDeNovo_contig_185942	NorthernBobwhite_ScaffoldedDeNovo_contig_90	159610
NorthernBobwhite_SimpleDeNovo_contig_129810	NorthernBobwhite_ScaffoldedDeNovo_contig_90	164023
NorthernBobwhite_SimpleDeNovo_contig_127483	NorthernBobwhite_ScaffoldedDeNovo_contig_90	167161
NorthernBobwhite_SimpleDeNovo_contig_195724	NorthernBobwhite_ScaffoldedDeNovo_contig_90	168737
NorthernBobwhite_SimpleDeNovo_contig_158855	NorthernBobwhite_ScaffoldedDeNovo_contig_90	175506
NorthernBobwhite_SimpleDeNovo_contig_109711	NorthernBobwhite_ScaffoldedDeNovo_contig_91	1
NorthernBobwhite_SimpleDeNovo_contig_43379	NorthernBobwhite_ScaffoldedDeNovo_contig_91	5573
NorthernBobwhite_SimpleDeNovo_contig_333473	NorthernBobwhite_ScaffoldedDeNovo_contig_91	5573
NorthernBobwhite_SimpleDeNovo_contig_68789	NorthernBobwhite_ScaffoldedDeNovo_contig_91	15970
NorthernBobwhite_SimpleDeNovo_contig_154115	NorthernBobwhite_ScaffoldedDeNovo_contig_91	23307
NorthernBobwhite_SimpleDeNovo_contig_21937	NorthernBobwhite_ScaffoldedDeNovo_contig_91	30875
NorthernBobwhite_SimpleDeNovo_contig_90035	NorthernBobwhite_ScaffoldedDeNovo_contig_91	35083
NorthernBobwhite_SimpleDeNovo_contig_80931	NorthernBobwhite_ScaffoldedDeNovo_contig_91	38570
NorthernBobwhite_SimpleDeNovo_contig_22723	NorthernBobwhite_ScaffoldedDeNovo_contig_91	49637
NorthernBobwhite_SimpleDeNovo_contig_132929	NorthernBobwhite_ScaffoldedDeNovo_contig_91	52927
NorthernBobwhite_SimpleDeNovo_contig_167101	NorthernBobwhite_ScaffoldedDeNovo_contig_91	58301
NorthernBobwhite_SimpleDeNovo_contig_167100	NorthernBobwhite_ScaffoldedDeNovo_contig_91	63329
NorthernBobwhite_SimpleDeNovo_contig_127684	NorthernBobwhite_ScaffoldedDeNovo_contig_91	67284
NorthernBobwhite_SimpleDeNovo_contig_127683	NorthernBobwhite_ScaffoldedDeNovo_contig_91	69386
NorthernBobwhite_SimpleDeNovo_contig_462	NorthernBobwhite_ScaffoldedDeNovo_contig_91	72843
NorthernBobwhite_SimpleDeNovo_contig_165310	NorthernBobwhite_ScaffoldedDeNovo_contig_91	79991
NorthernBobwhite_SimpleDeNovo_contig_173	NorthernBobwhite_ScaffoldedDeNovo_contig_92	1
NorthernBobwhite_SimpleDeNovo_contig_132070	NorthernBobwhite_ScaffoldedDeNovo_contig_93	1
NorthernBobwhite_SimpleDeNovo_contig_175540	NorthernBobwhite_ScaffoldedDeNovo_contig_93	7025
NorthernBobwhite_SimpleDeNovo_contig_149642	NorthernBobwhite_ScaffoldedDeNovo_contig_93	10446
NorthernBobwhite_SimpleDeNovo_contig_151825	NorthernBobwhite_ScaffoldedDeNovo_contig_93	11937
NorthernBobwhite_SimpleDeNovo_contig_104990	NorthernBobwhite_ScaffoldedDeNovo_contig_93	14125
NorthernBobwhite_SimpleDeNovo_contig_243221	NorthernBobwhite_ScaffoldedDeNovo_contig_93	21299
NorthernBobwhite_SimpleDeNovo_contig_51603	NorthernBobwhite_ScaffoldedDeNovo_contig_93	24205
NorthernBobwhite_SimpleDeNovo_contig_244647	NorthernBobwhite_ScaffoldedDeNovo_contig_93	26812
NorthernBobwhite_SimpleDeNovo_contig_31560	NorthernBobwhite_ScaffoldedDeNovo_contig_93	29375
NorthernBobwhite_SimpleDeNovo_contig_146598	NorthernBobwhite_ScaffoldedDeNovo_contig_93	33242
NorthernBobwhite_SimpleDeNovo_contig_74872	NorthernBobwhite_ScaffoldedDeNovo_contig_93	37278
NorthernBobwhite_SimpleDeNovo_contig_84386	NorthernBobwhite_ScaffoldedDeNovo_contig_93	47436
NorthernBobwhite_SimpleDeNovo_contig_78635	NorthernBobwhite_ScaffoldedDeNovo_contig_93	49755
NorthernBobwhite_SimpleDeNovo_contig_98642	NorthernBobwhite_ScaffoldedDeNovo_contig_93	54916
NorthernBobwhite_SimpleDeNovo_contig_31769	NorthernBobwhite_ScaffoldedDeNovo_contig_93	57019
NorthernBobwhite_SimpleDeNovo_contig_31768	NorthernBobwhite_ScaffoldedDeNovo_contig_93	60058
NorthernBobwhite_SimpleDeNovo_contig_54543	NorthernBobwhite_ScaffoldedDeNovo_contig_93	63462
NorthernBobwhite_SimpleDeNovo_contig_54542	NorthernBobwhite_ScaffoldedDeNovo_contig_93	66251
NorthernBobwhite_SimpleDeNovo_contig_135411	NorthernBobwhite_ScaffoldedDeNovo_contig_93	69525
NorthernBobwhite_SimpleDeNovo_contig_99829	NorthernBobwhite_ScaffoldedDeNovo_contig_93	74874
NorthernBobwhite_SimpleDeNovo_contig_170594	NorthernBobwhite_ScaffoldedDeNovo_contig_93	78584
NorthernBobwhite_SimpleDeNovo_contig_179494	NorthernBobwhite_ScaffoldedDeNovo_contig_93	107458
NorthernBobwhite_SimpleDeNovo_contig_84710	NorthernBobwhite_ScaffoldedDeNovo_contig_93	115630
NorthernBobwhite_SimpleDeNovo_contig_174	NorthernBobwhite_ScaffoldedDeNovo_contig_93	123616
NorthernBobwhite_SimpleDeNovo_contig_154749	NorthernBobwhite_ScaffoldedDeNovo_contig_93	130897
NorthernBobwhite_SimpleDeNovo_contig_120102	NorthernBobwhite_ScaffoldedDeNovo_contig_93	132554
NorthernBobwhite_SimpleDeNovo_contig_116799	NorthernBobwhite_ScaffoldedDeNovo_contig_93	139062
NorthernBobwhite_SimpleDeNovo_contig_241994	NorthernBobwhite_ScaffoldedDeNovo_contig_94	1
NorthernBobwhite_SimpleDeNovo_contig_63666	NorthernBobwhite_ScaffoldedDeNovo_contig_94	2514
NorthernBobwhite_SimpleDeNovo_contig_106819	NorthernBobwhite_ScaffoldedDeNovo_contig_94	6974
NorthernBobwhite_SimpleDeNovo_contig_58880	NorthernBobwhite_ScaffoldedDeNovo_contig_94	11022
NorthernBobwhite_SimpleDeNovo_contig_39108	NorthernBobwhite_ScaffoldedDeNovo_contig_94	32900
NorthernBobwhite_SimpleDeNovo_contig_172243	NorthernBobwhite_ScaffoldedDeNovo_contig_94	37532
NorthernBobwhite_SimpleDeNovo_contig_158586	NorthernBobwhite_ScaffoldedDeNovo_contig_94	40423
NorthernBobwhite_SimpleDeNovo_contig_348564	NorthernBobwhite_ScaffoldedDeNovo_contig_94	52843
NorthernBobwhite_SimpleDeNovo_contig_156292	NorthernBobwhite_ScaffoldedDeNovo_contig_94	56714
NorthernBobwhite_SimpleDeNovo_contig_222522	NorthernBobwhite_ScaffoldedDeNovo_contig_94	60654
NorthernBobwhite_SimpleDeNovo_contig_173684	NorthernBobwhite_ScaffoldedDeNovo_contig_94	62988
NorthernBobwhite_SimpleDeNovo_contig_8897	NorthernBobwhite_ScaffoldedDeNovo_contig_94	65700
NorthernBobwhite_SimpleDeNovo_contig_52502	NorthernBobwhite_ScaffoldedDeNovo_contig_94	69962
NorthernBobwhite_SimpleDeNovo_contig_38169	NorthernBobwhite_ScaffoldedDeNovo_contig_94	71144
NorthernBobwhite_SimpleDeNovo_contig_53499	NorthernBobwhite_ScaffoldedDeNovo_contig_94	72170
NorthernBobwhite_SimpleDeNovo_contig_207061	NorthernBobwhite_ScaffoldedDeNovo_contig_94	80045
NorthernBobwhite_SimpleDeNovo_contig_73684	NorthernBobwhite_ScaffoldedDeNovo_contig_94	81737
NorthernBobwhite_SimpleDeNovo_contig_29817	NorthernBobwhite_ScaffoldedDeNovo_contig_94	89595
NorthernBobwhite_SimpleDeNovo_contig_38660	NorthernBobwhite_ScaffoldedDeNovo_contig_95	1
NorthernBobwhite_SimpleDeNovo_contig_94474	NorthernBobwhite_ScaffoldedDeNovo_contig_95	3519
NorthernBobwhite_SimpleDeNovo_contig_94475	NorthernBobwhite_ScaffoldedDeNovo_contig_95	8714
NorthernBobwhite_SimpleDeNovo_contig_14351	NorthernBobwhite_ScaffoldedDeNovo_contig_95	24080
NorthernBobwhite_SimpleDeNovo_contig_177	NorthernBobwhite_ScaffoldedDeNovo_contig_95	38830
NorthernBobwhite_SimpleDeNovo_contig_176	NorthernBobwhite_ScaffoldedDeNovo_contig_95	41071
NorthernBobwhite_SimpleDeNovo_contig_22438	NorthernBobwhite_ScaffoldedDeNovo_contig_96	305
NorthernBobwhite_SimpleDeNovo_contig_133154	NorthernBobwhite_ScaffoldedDeNovo_contig_97	1
NorthernBobwhite_SimpleDeNovo_contig_294315	NorthernBobwhite_ScaffoldedDeNovo_contig_97	2044
NorthernBobwhite_SimpleDeNovo_contig_179	NorthernBobwhite_ScaffoldedDeNovo_contig_98	1
NorthernBobwhite_SimpleDeNovo_contig_293216	NorthernBobwhite_ScaffoldedDeNovo_contig_99	1
NorthernBobwhite_SimpleDeNovo_contig_151702	NorthernBobwhite_ScaffoldedDeNovo_contig_99	3171
NorthernBobwhite_SimpleDeNovo_contig_151701	NorthernBobwhite_ScaffoldedDeNovo_contig_99	5162
NorthernBobwhite_SimpleDeNovo_contig_18763	NorthernBobwhite_ScaffoldedDeNovo_contig_99	22436
NorthernBobwhite_SimpleDeNovo_contig_41913	NorthernBobwhite_ScaffoldedDeNovo_contig_99	42844
NorthernBobwhite_SimpleDeNovo_contig_85589	NorthernBobwhite_ScaffoldedDeNovo_contig_99	53090
NorthernBobwhite_SimpleDeNovo_contig_118266	NorthernBobwhite_ScaffoldedDeNovo_contig_99	60743
NorthernBobwhite_SimpleDeNovo_contig_118265	NorthernBobwhite_ScaffoldedDeNovo_contig_99	63555
NorthernBobwhite_SimpleDeNovo_contig_112308	NorthernBobwhite_ScaffoldedDeNovo_contig_99	65582
NorthernBobwhite_SimpleDeNovo_contig_240591	NorthernBobwhite_ScaffoldedDeNovo_contig_100	1
NorthernBobwhite_SimpleDeNovo_contig_183819	NorthernBobwhite_ScaffoldedDeNovo_contig_100	2500
NorthernBobwhite_SimpleDeNovo_contig_128944	NorthernBobwhite_ScaffoldedDeNovo_contig_100	7735
NorthernBobwhite_SimpleDeNovo_contig_8293	NorthernBobwhite_ScaffoldedDeNovo_contig_100	15896
NorthernBobwhite_SimpleDeNovo_contig_124991	NorthernBobwhite_ScaffoldedDeNovo_contig_100	20051
NorthernBobwhite_SimpleDeNovo_contig_343237	NorthernBobwhite_ScaffoldedDeNovo_contig_100	28359
NorthernBobwhite_SimpleDeNovo_contig_181	NorthernBobwhite_ScaffoldedDeNovo_contig_100	28732
NorthernBobwhite_SimpleDeNovo_contig_212267	NorthernBobwhite_ScaffoldedDeNovo_contig_100	35000
NorthernBobwhite_SimpleDeNovo_contig_57165	NorthernBobwhite_ScaffoldedDeNovo_contig_100	37827
NorthernBobwhite_SimpleDeNovo_contig_132136	NorthernBobwhite_ScaffoldedDeNovo_contig_100	45976
NorthernBobwhite_SimpleDeNovo_contig_124066	NorthernBobwhite_ScaffoldedDeNovo_contig_100	48930
NorthernBobwhite_SimpleDeNovo_contig_109605	NorthernBobwhite_ScaffoldedDeNovo_contig_100	51598
NorthernBobwhite_SimpleDeNovo_contig_291585	NorthernBobwhite_ScaffoldedDeNovo_contig_100	54147
NorthernBobwhite_SimpleDeNovo_contig_104788	NorthernBobwhite_ScaffoldedDeNovo_contig_100	55611
NorthernBobwhite_SimpleDeNovo_contig_140770	NorthernBobwhite_ScaffoldedDeNovo_contig_101	1
NorthernBobwhite_SimpleDeNovo_contig_25119	NorthernBobwhite_ScaffoldedDeNovo_contig_101	1686
NorthernBobwhite_SimpleDeNovo_contig_5894	NorthernBobwhite_ScaffoldedDeNovo_contig_101	5869
NorthernBobwhite_SimpleDeNovo_contig_5895	NorthernBobwhite_ScaffoldedDeNovo_contig_101	11841
NorthernBobwhite_SimpleDeNovo_contig_76900	NorthernBobwhite_ScaffoldedDeNovo_contig_101	16666
NorthernBobwhite_SimpleDeNovo_contig_188557	NorthernBobwhite_ScaffoldedDeNovo_contig_101	24185
NorthernBobwhite_SimpleDeNovo_contig_121318	NorthernBobwhite_ScaffoldedDeNovo_contig_101	28166
NorthernBobwhite_SimpleDeNovo_contig_57223	NorthernBobwhite_ScaffoldedDeNovo_contig_101	31094
NorthernBobwhite_SimpleDeNovo_contig_82004	NorthernBobwhite_ScaffoldedDeNovo_contig_101	51180
NorthernBobwhite_SimpleDeNovo_contig_269187	NorthernBobwhite_ScaffoldedDeNovo_contig_101	55474
NorthernBobwhite_SimpleDeNovo_contig_269188	NorthernBobwhite_ScaffoldedDeNovo_contig_101	55474
NorthernBobwhite_SimpleDeNovo_contig_161269	NorthernBobwhite_ScaffoldedDeNovo_contig_101	55756
NorthernBobwhite_SimpleDeNovo_contig_215270	NorthernBobwhite_ScaffoldedDeNovo_contig_101	81976
NorthernBobwhite_SimpleDeNovo_contig_140635	NorthernBobwhite_ScaffoldedDeNovo_contig_101	83408
NorthernBobwhite_SimpleDeNovo_contig_22243	NorthernBobwhite_ScaffoldedDeNovo_contig_101	87689
NorthernBobwhite_SimpleDeNovo_contig_162239	NorthernBobwhite_ScaffoldedDeNovo_contig_101	104533
NorthernBobwhite_SimpleDeNovo_contig_112214	NorthernBobwhite_ScaffoldedDeNovo_contig_101	105938
NorthernBobwhite_SimpleDeNovo_contig_134147	NorthernBobwhite_ScaffoldedDeNovo_contig_101	107379
NorthernBobwhite_SimpleDeNovo_contig_129564	NorthernBobwhite_ScaffoldedDeNovo_contig_101	111711
NorthernBobwhite_SimpleDeNovo_contig_117863	NorthernBobwhite_ScaffoldedDeNovo_contig_101	116335
NorthernBobwhite_SimpleDeNovo_contig_137166	NorthernBobwhite_ScaffoldedDeNovo_contig_101	121728
NorthernBobwhite_SimpleDeNovo_contig_125613	NorthernBobwhite_ScaffoldedDeNovo_contig_101	125310
NorthernBobwhite_SimpleDeNovo_contig_183	NorthernBobwhite_ScaffoldedDeNovo_contig_102	1
NorthernBobwhite_SimpleDeNovo_contig_199570	NorthernBobwhite_ScaffoldedDeNovo_contig_102	5486
NorthernBobwhite_SimpleDeNovo_contig_144706	NorthernBobwhite_ScaffoldedDeNovo_contig_104	1
NorthernBobwhite_SimpleDeNovo_contig_153834	NorthernBobwhite_ScaffoldedDeNovo_contig_104	22957
NorthernBobwhite_SimpleDeNovo_contig_210708	NorthernBobwhite_ScaffoldedDeNovo_contig_104	27855
NorthernBobwhite_SimpleDeNovo_contig_210709	NorthernBobwhite_ScaffoldedDeNovo_contig_104	31632
NorthernBobwhite_SimpleDeNovo_contig_218950	NorthernBobwhite_ScaffoldedDeNovo_contig_104	33230
NorthernBobwhite_SimpleDeNovo_contig_236879	NorthernBobwhite_ScaffoldedDeNovo_contig_104	33754
NorthernBobwhite_SimpleDeNovo_contig_25871	NorthernBobwhite_ScaffoldedDeNovo_contig_104	43347
NorthernBobwhite_SimpleDeNovo_contig_8340	NorthernBobwhite_ScaffoldedDeNovo_contig_104	49261
NorthernBobwhite_SimpleDeNovo_contig_272902	NorthernBobwhite_ScaffoldedDeNovo_contig_104	50690
NorthernBobwhite_SimpleDeNovo_contig_292330	NorthernBobwhite_ScaffoldedDeNovo_contig_104	51587
NorthernBobwhite_SimpleDeNovo_contig_8339	NorthernBobwhite_ScaffoldedDeNovo_contig_104	51947
NorthernBobwhite_SimpleDeNovo_contig_229123	NorthernBobwhite_ScaffoldedDeNovo_contig_104	65343
NorthernBobwhite_SimpleDeNovo_contig_331868	NorthernBobwhite_ScaffoldedDeNovo_contig_104	68855
NorthernBobwhite_SimpleDeNovo_contig_24283	NorthernBobwhite_ScaffoldedDeNovo_contig_104	69567
NorthernBobwhite_SimpleDeNovo_contig_239047	NorthernBobwhite_ScaffoldedDeNovo_contig_104	79231
NorthernBobwhite_SimpleDeNovo_contig_70307	NorthernBobwhite_ScaffoldedDeNovo_contig_104	81430
NorthernBobwhite_SimpleDeNovo_contig_127	NorthernBobwhite_ScaffoldedDeNovo_contig_105	1
NorthernBobwhite_SimpleDeNovo_contig_237680	NorthernBobwhite_ScaffoldedDeNovo_contig_105	5710
NorthernBobwhite_SimpleDeNovo_contig_158244	NorthernBobwhite_ScaffoldedDeNovo_contig_105	7031
NorthernBobwhite_SimpleDeNovo_contig_249043	NorthernBobwhite_ScaffoldedDeNovo_contig_105	8107
NorthernBobwhite_SimpleDeNovo_contig_252855	NorthernBobwhite_ScaffoldedDeNovo_contig_106	1
NorthernBobwhite_SimpleDeNovo_contig_31004	NorthernBobwhite_ScaffoldedDeNovo_contig_106	8401
NorthernBobwhite_SimpleDeNovo_contig_70278	NorthernBobwhite_ScaffoldedDeNovo_contig_106	20900
NorthernBobwhite_SimpleDeNovo_contig_128716	NorthernBobwhite_ScaffoldedDeNovo_contig_106	23858
NorthernBobwhite_SimpleDeNovo_contig_119656	NorthernBobwhite_ScaffoldedDeNovo_contig_106	47476
NorthernBobwhite_SimpleDeNovo_contig_106424	NorthernBobwhite_ScaffoldedDeNovo_contig_106	50414
NorthernBobwhite_SimpleDeNovo_contig_118752	NorthernBobwhite_ScaffoldedDeNovo_contig_106	57517
NorthernBobwhite_SimpleDeNovo_contig_130309	NorthernBobwhite_ScaffoldedDeNovo_contig_106	69222
NorthernBobwhite_SimpleDeNovo_contig_124083	NorthernBobwhite_ScaffoldedDeNovo_contig_106	70407
NorthernBobwhite_SimpleDeNovo_contig_129	NorthernBobwhite_ScaffoldedDeNovo_contig_107	1
NorthernBobwhite_SimpleDeNovo_contig_130	NorthernBobwhite_ScaffoldedDeNovo_contig_108	1
NorthernBobwhite_SimpleDeNovo_contig_150411	NorthernBobwhite_ScaffoldedDeNovo_contig_108	2567
NorthernBobwhite_SimpleDeNovo_contig_150410	NorthernBobwhite_ScaffoldedDeNovo_contig_108	7904
NorthernBobwhite_SimpleDeNovo_contig_476	NorthernBobwhite_ScaffoldedDeNovo_contig_109	1
NorthernBobwhite_SimpleDeNovo_contig_171659	NorthernBobwhite_ScaffoldedDeNovo_contig_109	22467
NorthernBobwhite_SimpleDeNovo_contig_131	NorthernBobwhite_ScaffoldedDeNovo_contig_109	26446
NorthernBobwhite_SimpleDeNovo_contig_4745	NorthernBobwhite_ScaffoldedDeNovo_contig_109	29659
NorthernBobwhite_SimpleDeNovo_contig_145020	NorthernBobwhite_ScaffoldedDeNovo_contig_109	34860
NorthernBobwhite_SimpleDeNovo_contig_193947	NorthernBobwhite_ScaffoldedDeNovo_contig_109	40314
NorthernBobwhite_SimpleDeNovo_contig_103590	NorthernBobwhite_ScaffoldedDeNovo_contig_109	41648
NorthernBobwhite_SimpleDeNovo_contig_116491	NorthernBobwhite_ScaffoldedDeNovo_contig_109	46559
NorthernBobwhite_SimpleDeNovo_contig_360126	NorthernBobwhite_ScaffoldedDeNovo_contig_109	46559
NorthernBobwhite_SimpleDeNovo_contig_180828	NorthernBobwhite_ScaffoldedDeNovo_contig_109	46850
NorthernBobwhite_SimpleDeNovo_contig_262803	NorthernBobwhite_ScaffoldedDeNovo_contig_109	49580
NorthernBobwhite_SimpleDeNovo_contig_102699	NorthernBobwhite_ScaffoldedDeNovo_contig_109	52008
NorthernBobwhite_SimpleDeNovo_contig_93784	NorthernBobwhite_ScaffoldedDeNovo_contig_109	59573
NorthernBobwhite_SimpleDeNovo_contig_75188	NorthernBobwhite_ScaffoldedDeNovo_contig_109	63386
NorthernBobwhite_SimpleDeNovo_contig_75189	NorthernBobwhite_ScaffoldedDeNovo_contig_109	65146
NorthernBobwhite_SimpleDeNovo_contig_319593	NorthernBobwhite_ScaffoldedDeNovo_contig_109	67643
NorthernBobwhite_SimpleDeNovo_contig_347288	NorthernBobwhite_ScaffoldedDeNovo_contig_109	67643
NorthernBobwhite_SimpleDeNovo_contig_181634	NorthernBobwhite_ScaffoldedDeNovo_contig_109	68034
NorthernBobwhite_SimpleDeNovo_contig_266108	NorthernBobwhite_ScaffoldedDeNovo_contig_109	69324
NorthernBobwhite_SimpleDeNovo_contig_34095	NorthernBobwhite_ScaffoldedDeNovo_contig_109	71087
NorthernBobwhite_SimpleDeNovo_contig_25081	NorthernBobwhite_ScaffoldedDeNovo_contig_109	73985
NorthernBobwhite_SimpleDeNovo_contig_34697	NorthernBobwhite_ScaffoldedDeNovo_contig_109	81848
NorthernBobwhite_SimpleDeNovo_contig_35687	NorthernBobwhite_ScaffoldedDeNovo_contig_109	84865
NorthernBobwhite_SimpleDeNovo_contig_27194	NorthernBobwhite_ScaffoldedDeNovo_contig_110	1
NorthernBobwhite_SimpleDeNovo_contig_126273	NorthernBobwhite_ScaffoldedDeNovo_contig_110	4955
NorthernBobwhite_SimpleDeNovo_contig_147644	NorthernBobwhite_ScaffoldedDeNovo_contig_110	9102
NorthernBobwhite_SimpleDeNovo_contig_133	NorthernBobwhite_ScaffoldedDeNovo_contig_110	23376
NorthernBobwhite_SimpleDeNovo_contig_132	NorthernBobwhite_ScaffoldedDeNovo_contig_110	26286
NorthernBobwhite_SimpleDeNovo_contig_203050	NorthernBobwhite_ScaffoldedDeNovo_contig_110	28262
NorthernBobwhite_SimpleDeNovo_contig_69654	NorthernBobwhite_ScaffoldedDeNovo_contig_110	29789
NorthernBobwhite_SimpleDeNovo_contig_239959	NorthernBobwhite_ScaffoldedDeNovo_contig_110	32769
NorthernBobwhite_SimpleDeNovo_contig_673	NorthernBobwhite_ScaffoldedDeNovo_contig_112	1
NorthernBobwhite_SimpleDeNovo_contig_672	NorthernBobwhite_ScaffoldedDeNovo_contig_112	3648
NorthernBobwhite_SimpleDeNovo_contig_199358	NorthernBobwhite_ScaffoldedDeNovo_contig_112	5891
NorthernBobwhite_SimpleDeNovo_contig_164492	NorthernBobwhite_ScaffoldedDeNovo_contig_112	6935
NorthernBobwhite_SimpleDeNovo_contig_24358	NorthernBobwhite_ScaffoldedDeNovo_contig_112	8622
NorthernBobwhite_SimpleDeNovo_contig_192132	NorthernBobwhite_ScaffoldedDeNovo_contig_112	20486
NorthernBobwhite_SimpleDeNovo_contig_98523	NorthernBobwhite_ScaffoldedDeNovo_contig_112	23072
NorthernBobwhite_SimpleDeNovo_contig_25421	NorthernBobwhite_ScaffoldedDeNovo_contig_112	25846
NorthernBobwhite_SimpleDeNovo_contig_157669	NorthernBobwhite_ScaffoldedDeNovo_contig_112	32445
NorthernBobwhite_SimpleDeNovo_contig_63067	NorthernBobwhite_ScaffoldedDeNovo_contig_112	39633
NorthernBobwhite_SimpleDeNovo_contig_63068	NorthernBobwhite_ScaffoldedDeNovo_contig_112	46548
NorthernBobwhite_SimpleDeNovo_contig_96905	NorthernBobwhite_ScaffoldedDeNovo_contig_112	49654
NorthernBobwhite_SimpleDeNovo_contig_64935	NorthernBobwhite_ScaffoldedDeNovo_contig_112	55590
NorthernBobwhite_SimpleDeNovo_contig_145406	NorthernBobwhite_ScaffoldedDeNovo_contig_112	63049
NorthernBobwhite_SimpleDeNovo_contig_67749	NorthernBobwhite_ScaffoldedDeNovo_contig_112	66731
NorthernBobwhite_SimpleDeNovo_contig_93670	NorthernBobwhite_ScaffoldedDeNovo_contig_112	88325
NorthernBobwhite_SimpleDeNovo_contig_194103	NorthernBobwhite_ScaffoldedDeNovo_contig_112	93630
NorthernBobwhite_SimpleDeNovo_contig_52876	NorthernBobwhite_ScaffoldedDeNovo_contig_112	95900
NorthernBobwhite_SimpleDeNovo_contig_203863	NorthernBobwhite_ScaffoldedDeNovo_contig_112	99284
NorthernBobwhite_SimpleDeNovo_contig_52877	NorthernBobwhite_ScaffoldedDeNovo_contig_112	100797
NorthernBobwhite_SimpleDeNovo_contig_32763	NorthernBobwhite_ScaffoldedDeNovo_contig_112	108730
NorthernBobwhite_SimpleDeNovo_contig_178860	NorthernBobwhite_ScaffoldedDeNovo_contig_112	112627
NorthernBobwhite_SimpleDeNovo_contig_28837	NorthernBobwhite_ScaffoldedDeNovo_contig_112	117228
NorthernBobwhite_SimpleDeNovo_contig_146454	NorthernBobwhite_ScaffoldedDeNovo_contig_112	124810
NorthernBobwhite_SimpleDeNovo_contig_33878	NorthernBobwhite_ScaffoldedDeNovo_contig_112	128353
NorthernBobwhite_SimpleDeNovo_contig_30636	NorthernBobwhite_ScaffoldedDeNovo_contig_112	130490
NorthernBobwhite_SimpleDeNovo_contig_197260	NorthernBobwhite_ScaffoldedDeNovo_contig_112	133035
NorthernBobwhite_SimpleDeNovo_contig_174747	NorthernBobwhite_ScaffoldedDeNovo_contig_112	133918
NorthernBobwhite_SimpleDeNovo_contig_121229	NorthernBobwhite_ScaffoldedDeNovo_contig_112	144460
NorthernBobwhite_SimpleDeNovo_contig_101355	NorthernBobwhite_ScaffoldedDeNovo_contig_112	148468
NorthernBobwhite_SimpleDeNovo_contig_113486	NorthernBobwhite_ScaffoldedDeNovo_contig_112	154881
NorthernBobwhite_SimpleDeNovo_contig_120557	NorthernBobwhite_ScaffoldedDeNovo_contig_112	162017
NorthernBobwhite_SimpleDeNovo_contig_28350	NorthernBobwhite_ScaffoldedDeNovo_contig_112	167179
NorthernBobwhite_SimpleDeNovo_contig_113160	NorthernBobwhite_ScaffoldedDeNovo_contig_112	169296
NorthernBobwhite_SimpleDeNovo_contig_156575	NorthernBobwhite_ScaffoldedDeNovo_contig_112	176941
NorthernBobwhite_SimpleDeNovo_contig_22330	NorthernBobwhite_ScaffoldedDeNovo_contig_112	180430
NorthernBobwhite_SimpleDeNovo_contig_135	NorthernBobwhite_ScaffoldedDeNovo_contig_112	185800
NorthernBobwhite_SimpleDeNovo_contig_73533	NorthernBobwhite_ScaffoldedDeNovo_contig_112	190474
NorthernBobwhite_SimpleDeNovo_contig_304339	NorthernBobwhite_ScaffoldedDeNovo_contig_112	197609
NorthernBobwhite_SimpleDeNovo_contig_291593	NorthernBobwhite_ScaffoldedDeNovo_contig_112	198521
NorthernBobwhite_SimpleDeNovo_contig_152711	NorthernBobwhite_ScaffoldedDeNovo_contig_112	199198
NorthernBobwhite_SimpleDeNovo_contig_141515	NorthernBobwhite_ScaffoldedDeNovo_contig_112	223105
NorthernBobwhite_SimpleDeNovo_contig_21622	NorthernBobwhite_ScaffoldedDeNovo_contig_112	225202
NorthernBobwhite_SimpleDeNovo_contig_60478	NorthernBobwhite_ScaffoldedDeNovo_contig_113	1
NorthernBobwhite_SimpleDeNovo_contig_155647	NorthernBobwhite_ScaffoldedDeNovo_contig_113	4840
NorthernBobwhite_SimpleDeNovo_contig_115519	NorthernBobwhite_ScaffoldedDeNovo_contig_113	8127
NorthernBobwhite_SimpleDeNovo_contig_106	NorthernBobwhite_ScaffoldedDeNovo_contig_113	10405
NorthernBobwhite_SimpleDeNovo_contig_105	NorthernBobwhite_ScaffoldedDeNovo_contig_113	12738
NorthernBobwhite_SimpleDeNovo_contig_301858	NorthernBobwhite_ScaffoldedDeNovo_contig_113	16867
NorthernBobwhite_SimpleDeNovo_contig_355470	NorthernBobwhite_ScaffoldedDeNovo_contig_113	16867
NorthernBobwhite_SimpleDeNovo_contig_113170	NorthernBobwhite_ScaffoldedDeNovo_contig_113	17155
NorthernBobwhite_SimpleDeNovo_contig_24495	NorthernBobwhite_ScaffoldedDeNovo_contig_114	1
NorthernBobwhite_SimpleDeNovo_contig_155206	NorthernBobwhite_ScaffoldedDeNovo_contig_114	4531
NorthernBobwhite_SimpleDeNovo_contig_14764	NorthernBobwhite_ScaffoldedDeNovo_contig_114	7391
NorthernBobwhite_SimpleDeNovo_contig_14763	NorthernBobwhite_ScaffoldedDeNovo_contig_114	9897
NorthernBobwhite_SimpleDeNovo_contig_85315	NorthernBobwhite_ScaffoldedDeNovo_contig_114	21966
NorthernBobwhite_SimpleDeNovo_contig_1726	NorthernBobwhite_ScaffoldedDeNovo_contig_114	43871
NorthernBobwhite_SimpleDeNovo_contig_183765	NorthernBobwhite_ScaffoldedDeNovo_contig_114	61898
NorthernBobwhite_SimpleDeNovo_contig_78236	NorthernBobwhite_ScaffoldedDeNovo_contig_114	76995
NorthernBobwhite_SimpleDeNovo_contig_84069	NorthernBobwhite_ScaffoldedDeNovo_contig_115	1
NorthernBobwhite_SimpleDeNovo_contig_127411	NorthernBobwhite_ScaffoldedDeNovo_contig_115	5036
NorthernBobwhite_SimpleDeNovo_contig_47381	NorthernBobwhite_ScaffoldedDeNovo_contig_115	35846
NorthernBobwhite_SimpleDeNovo_contig_40055	NorthernBobwhite_ScaffoldedDeNovo_contig_115	40020
NorthernBobwhite_SimpleDeNovo_contig_180408	NorthernBobwhite_ScaffoldedDeNovo_contig_115	46886
NorthernBobwhite_SimpleDeNovo_contig_182228	NorthernBobwhite_ScaffoldedDeNovo_contig_115	49046
NorthernBobwhite_SimpleDeNovo_contig_162277	NorthernBobwhite_ScaffoldedDeNovo_contig_115	52849
NorthernBobwhite_SimpleDeNovo_contig_227468	NorthernBobwhite_ScaffoldedDeNovo_contig_115	55249
NorthernBobwhite_SimpleDeNovo_contig_196621	NorthernBobwhite_ScaffoldedDeNovo_contig_115	81315
NorthernBobwhite_SimpleDeNovo_contig_88348	NorthernBobwhite_ScaffoldedDeNovo_contig_115	104833
NorthernBobwhite_SimpleDeNovo_contig_328270	NorthernBobwhite_ScaffoldedDeNovo_contig_115	123751
NorthernBobwhite_SimpleDeNovo_contig_148441	NorthernBobwhite_ScaffoldedDeNovo_contig_116	1
NorthernBobwhite_SimpleDeNovo_contig_16516	NorthernBobwhite_ScaffoldedDeNovo_contig_116	1984
NorthernBobwhite_SimpleDeNovo_contig_49730	NorthernBobwhite_ScaffoldedDeNovo_contig_116	25477
NorthernBobwhite_SimpleDeNovo_contig_109	NorthernBobwhite_ScaffoldedDeNovo_contig_116	29857
NorthernBobwhite_SimpleDeNovo_contig_12700	NorthernBobwhite_ScaffoldedDeNovo_contig_117	1
NorthernBobwhite_SimpleDeNovo_contig_152147	NorthernBobwhite_ScaffoldedDeNovo_contig_117	6035
NorthernBobwhite_SimpleDeNovo_contig_201057	NorthernBobwhite_ScaffoldedDeNovo_contig_117	8772
NorthernBobwhite_SimpleDeNovo_contig_111	NorthernBobwhite_ScaffoldedDeNovo_contig_117	12682
NorthernBobwhite_SimpleDeNovo_contig_110	NorthernBobwhite_ScaffoldedDeNovo_contig_117	17651
NorthernBobwhite_SimpleDeNovo_contig_189759	NorthernBobwhite_ScaffoldedDeNovo_contig_118	1
NorthernBobwhite_SimpleDeNovo_contig_134512	NorthernBobwhite_ScaffoldedDeNovo_contig_118	1735
NorthernBobwhite_SimpleDeNovo_contig_110038	NorthernBobwhite_ScaffoldedDeNovo_contig_118	3929
NorthernBobwhite_SimpleDeNovo_contig_110039	NorthernBobwhite_ScaffoldedDeNovo_contig_118	6353
NorthernBobwhite_SimpleDeNovo_contig_137578	NorthernBobwhite_ScaffoldedDeNovo_contig_118	13704
NorthernBobwhite_SimpleDeNovo_contig_112	NorthernBobwhite_ScaffoldedDeNovo_contig_118	25961
NorthernBobwhite_SimpleDeNovo_contig_139972	NorthernBobwhite_ScaffoldedDeNovo_contig_118	33861
NorthernBobwhite_SimpleDeNovo_contig_197815	NorthernBobwhite_ScaffoldedDeNovo_contig_118	36865
NorthernBobwhite_SimpleDeNovo_contig_146975	NorthernBobwhite_ScaffoldedDeNovo_contig_118	38270
NorthernBobwhite_SimpleDeNovo_contig_74527	NorthernBobwhite_ScaffoldedDeNovo_contig_118	74197
NorthernBobwhite_SimpleDeNovo_contig_323766	NorthernBobwhite_ScaffoldedDeNovo_contig_118	78924
NorthernBobwhite_SimpleDeNovo_contig_357152	NorthernBobwhite_ScaffoldedDeNovo_contig_118	78924
NorthernBobwhite_SimpleDeNovo_contig_263704	NorthernBobwhite_ScaffoldedDeNovo_contig_118	79234
NorthernBobwhite_SimpleDeNovo_contig_287372	NorthernBobwhite_ScaffoldedDeNovo_contig_118	81078
NorthernBobwhite_SimpleDeNovo_contig_128856	NorthernBobwhite_ScaffoldedDeNovo_contig_119	1
NorthernBobwhite_SimpleDeNovo_contig_118276	NorthernBobwhite_ScaffoldedDeNovo_contig_119	4122
NorthernBobwhite_SimpleDeNovo_contig_182864	NorthernBobwhite_ScaffoldedDeNovo_contig_119	8256
NorthernBobwhite_SimpleDeNovo_contig_213568	NorthernBobwhite_ScaffoldedDeNovo_contig_119	11959
NorthernBobwhite_SimpleDeNovo_contig_116607	NorthernBobwhite_ScaffoldedDeNovo_contig_119	24692
NorthernBobwhite_SimpleDeNovo_contig_50419	NorthernBobwhite_ScaffoldedDeNovo_contig_119	25234
NorthernBobwhite_SimpleDeNovo_contig_28986	NorthernBobwhite_ScaffoldedDeNovo_contig_119	29802
NorthernBobwhite_SimpleDeNovo_contig_150139	NorthernBobwhite_ScaffoldedDeNovo_contig_119	34844
NorthernBobwhite_SimpleDeNovo_contig_304565	NorthernBobwhite_ScaffoldedDeNovo_contig_120	610
NorthernBobwhite_SimpleDeNovo_contig_337823	NorthernBobwhite_ScaffoldedDeNovo_contig_120	4039
NorthernBobwhite_SimpleDeNovo_contig_17242	NorthernBobwhite_ScaffoldedDeNovo_contig_120	4497
NorthernBobwhite_SimpleDeNovo_contig_157040	NorthernBobwhite_ScaffoldedDeNovo_contig_120	9848
NorthernBobwhite_SimpleDeNovo_contig_48307	NorthernBobwhite_ScaffoldedDeNovo_contig_120	10973
NorthernBobwhite_SimpleDeNovo_contig_82779	NorthernBobwhite_ScaffoldedDeNovo_contig_120	11649
NorthernBobwhite_SimpleDeNovo_contig_319358	NorthernBobwhite_ScaffoldedDeNovo_contig_120	12680
NorthernBobwhite_SimpleDeNovo_contig_48308	NorthernBobwhite_ScaffoldedDeNovo_contig_120	13418
NorthernBobwhite_SimpleDeNovo_contig_114	NorthernBobwhite_ScaffoldedDeNovo_contig_120	13776
NorthernBobwhite_SimpleDeNovo_contig_169396	NorthernBobwhite_ScaffoldedDeNovo_contig_120	19901
NorthernBobwhite_SimpleDeNovo_contig_216018	NorthernBobwhite_ScaffoldedDeNovo_contig_120	27130
NorthernBobwhite_SimpleDeNovo_contig_104574	NorthernBobwhite_ScaffoldedDeNovo_contig_120	38797
NorthernBobwhite_SimpleDeNovo_contig_35673	NorthernBobwhite_ScaffoldedDeNovo_contig_120	42067
NorthernBobwhite_SimpleDeNovo_contig_239267	NorthernBobwhite_ScaffoldedDeNovo_contig_120	48776
NorthernBobwhite_SimpleDeNovo_contig_50459	NorthernBobwhite_ScaffoldedDeNovo_contig_120	92043
NorthernBobwhite_SimpleDeNovo_contig_136516	NorthernBobwhite_ScaffoldedDeNovo_contig_120	99650
NorthernBobwhite_SimpleDeNovo_contig_93842	NorthernBobwhite_ScaffoldedDeNovo_contig_120	101293
NorthernBobwhite_SimpleDeNovo_contig_140145	NorthernBobwhite_ScaffoldedDeNovo_contig_120	109707
NorthernBobwhite_SimpleDeNovo_contig_115	NorthernBobwhite_ScaffoldedDeNovo_contig_121	1
NorthernBobwhite_SimpleDeNovo_contig_200577	NorthernBobwhite_ScaffoldedDeNovo_contig_122	18538
NorthernBobwhite_SimpleDeNovo_contig_118503	NorthernBobwhite_ScaffoldedDeNovo_contig_122	23551
NorthernBobwhite_SimpleDeNovo_contig_159551	NorthernBobwhite_ScaffoldedDeNovo_contig_122	43207
NorthernBobwhite_SimpleDeNovo_contig_114347	NorthernBobwhite_ScaffoldedDeNovo_contig_122	45818
NorthernBobwhite_SimpleDeNovo_contig_108743	NorthernBobwhite_ScaffoldedDeNovo_contig_122	56322
NorthernBobwhite_SimpleDeNovo_contig_123166	NorthernBobwhite_ScaffoldedDeNovo_contig_122	58471
NorthernBobwhite_SimpleDeNovo_contig_200963	NorthernBobwhite_ScaffoldedDeNovo_contig_123	1
NorthernBobwhite_SimpleDeNovo_contig_1976	NorthernBobwhite_ScaffoldedDeNovo_contig_123	2828
NorthernBobwhite_SimpleDeNovo_contig_91029	NorthernBobwhite_ScaffoldedDeNovo_contig_123	7049
NorthernBobwhite_SimpleDeNovo_contig_91028	NorthernBobwhite_ScaffoldedDeNovo_contig_123	7581
NorthernBobwhite_SimpleDeNovo_contig_108910	NorthernBobwhite_ScaffoldedDeNovo_contig_123	10788
NorthernBobwhite_SimpleDeNovo_contig_237651	NorthernBobwhite_ScaffoldedDeNovo_contig_123	17940
NorthernBobwhite_SimpleDeNovo_contig_43909	NorthernBobwhite_ScaffoldedDeNovo_contig_123	20970
NorthernBobwhite_SimpleDeNovo_contig_177512	NorthernBobwhite_ScaffoldedDeNovo_contig_123	40868
NorthernBobwhite_SimpleDeNovo_contig_26072	NorthernBobwhite_ScaffoldedDeNovo_contig_123	45393
NorthernBobwhite_SimpleDeNovo_contig_32789	NorthernBobwhite_ScaffoldedDeNovo_contig_123	50688
NorthernBobwhite_SimpleDeNovo_contig_113040	NorthernBobwhite_ScaffoldedDeNovo_contig_123	57440
NorthernBobwhite_SimpleDeNovo_contig_4914	NorthernBobwhite_ScaffoldedDeNovo_contig_123	62616
NorthernBobwhite_SimpleDeNovo_contig_167894	NorthernBobwhite_ScaffoldedDeNovo_contig_123	67426
NorthernBobwhite_SimpleDeNovo_contig_4913	NorthernBobwhite_ScaffoldedDeNovo_contig_123	68386
NorthernBobwhite_SimpleDeNovo_contig_50622	NorthernBobwhite_ScaffoldedDeNovo_contig_123	70314
NorthernBobwhite_SimpleDeNovo_contig_117	NorthernBobwhite_ScaffoldedDeNovo_contig_123	75128
NorthernBobwhite_SimpleDeNovo_contig_93441	NorthernBobwhite_ScaffoldedDeNovo_contig_123	78092
NorthernBobwhite_SimpleDeNovo_contig_33723	NorthernBobwhite_ScaffoldedDeNovo_contig_124	1
NorthernBobwhite_SimpleDeNovo_contig_89766	NorthernBobwhite_ScaffoldedDeNovo_contig_124	15822
NorthernBobwhite_SimpleDeNovo_contig_210786	NorthernBobwhite_ScaffoldedDeNovo_contig_124	19287
NorthernBobwhite_SimpleDeNovo_contig_109703	NorthernBobwhite_ScaffoldedDeNovo_contig_124	20812
NorthernBobwhite_SimpleDeNovo_contig_47484	NorthernBobwhite_ScaffoldedDeNovo_contig_124	22618
NorthernBobwhite_SimpleDeNovo_contig_68367	NorthernBobwhite_ScaffoldedDeNovo_contig_124	28915
NorthernBobwhite_SimpleDeNovo_contig_108013	NorthernBobwhite_ScaffoldedDeNovo_contig_124	32188
NorthernBobwhite_SimpleDeNovo_contig_244984	NorthernBobwhite_ScaffoldedDeNovo_contig_124	44744
NorthernBobwhite_SimpleDeNovo_contig_42331	NorthernBobwhite_ScaffoldedDeNovo_contig_124	46233
NorthernBobwhite_SimpleDeNovo_contig_42178	NorthernBobwhite_ScaffoldedDeNovo_contig_124	53513
NorthernBobwhite_SimpleDeNovo_contig_12895	NorthernBobwhite_ScaffoldedDeNovo_contig_124	56520
NorthernBobwhite_SimpleDeNovo_contig_14832	NorthernBobwhite_ScaffoldedDeNovo_contig_124	64529
NorthernBobwhite_SimpleDeNovo_contig_4935	NorthernBobwhite_ScaffoldedDeNovo_contig_124	68103
NorthernBobwhite_SimpleDeNovo_contig_18449	NorthernBobwhite_ScaffoldedDeNovo_contig_124	74849
NorthernBobwhite_SimpleDeNovo_contig_207962	NorthernBobwhite_ScaffoldedDeNovo_contig_124	83063
NorthernBobwhite_SimpleDeNovo_contig_91820	NorthernBobwhite_ScaffoldedDeNovo_contig_124	86265
NorthernBobwhite_SimpleDeNovo_contig_174923	NorthernBobwhite_ScaffoldedDeNovo_contig_124	90278
NorthernBobwhite_SimpleDeNovo_contig_69786	NorthernBobwhite_ScaffoldedDeNovo_contig_124	97609
NorthernBobwhite_SimpleDeNovo_contig_55689	NorthernBobwhite_ScaffoldedDeNovo_contig_124	100645
NorthernBobwhite_SimpleDeNovo_contig_143147	NorthernBobwhite_ScaffoldedDeNovo_contig_124	106604
NorthernBobwhite_SimpleDeNovo_contig_57561	NorthernBobwhite_ScaffoldedDeNovo_contig_124	111303
NorthernBobwhite_SimpleDeNovo_contig_106588	NorthernBobwhite_ScaffoldedDeNovo_contig_124	114332
NorthernBobwhite_SimpleDeNovo_contig_118	NorthernBobwhite_ScaffoldedDeNovo_contig_124	117108
NorthernBobwhite_SimpleDeNovo_contig_83717	NorthernBobwhite_ScaffoldedDeNovo_contig_124	118172
NorthernBobwhite_SimpleDeNovo_contig_150813	NorthernBobwhite_ScaffoldedDeNovo_contig_124	123308
NorthernBobwhite_SimpleDeNovo_contig_369867	NorthernBobwhite_ScaffoldedDeNovo_contig_124	130329
NorthernBobwhite_SimpleDeNovo_contig_130785	NorthernBobwhite_ScaffoldedDeNovo_contig_124	131073
NorthernBobwhite_SimpleDeNovo_contig_85905	NorthernBobwhite_ScaffoldedDeNovo_contig_125	1
NorthernBobwhite_SimpleDeNovo_contig_85904	NorthernBobwhite_ScaffoldedDeNovo_contig_125	1587
NorthernBobwhite_SimpleDeNovo_contig_171872	NorthernBobwhite_ScaffoldedDeNovo_contig_125	5770
NorthernBobwhite_SimpleDeNovo_contig_33220	NorthernBobwhite_ScaffoldedDeNovo_contig_125	11894
NorthernBobwhite_SimpleDeNovo_contig_122881	NorthernBobwhite_ScaffoldedDeNovo_contig_125	33334
NorthernBobwhite_SimpleDeNovo_contig_146102	NorthernBobwhite_ScaffoldedDeNovo_contig_125	35139
NorthernBobwhite_SimpleDeNovo_contig_79190	NorthernBobwhite_ScaffoldedDeNovo_contig_125	40284
NorthernBobwhite_SimpleDeNovo_contig_79191	NorthernBobwhite_ScaffoldedDeNovo_contig_125	42996
NorthernBobwhite_SimpleDeNovo_contig_189298	NorthernBobwhite_ScaffoldedDeNovo_contig_126	1
NorthernBobwhite_SimpleDeNovo_contig_139045	NorthernBobwhite_ScaffoldedDeNovo_contig_126	24193
NorthernBobwhite_SimpleDeNovo_contig_65824	NorthernBobwhite_ScaffoldedDeNovo_contig_126	49443
NorthernBobwhite_SimpleDeNovo_contig_108782	NorthernBobwhite_ScaffoldedDeNovo_contig_126	54574
NorthernBobwhite_SimpleDeNovo_contig_11670	NorthernBobwhite_ScaffoldedDeNovo_contig_127	1
NorthernBobwhite_SimpleDeNovo_contig_261084	NorthernBobwhite_ScaffoldedDeNovo_contig_127	4121
NorthernBobwhite_SimpleDeNovo_contig_239152	NorthernBobwhite_ScaffoldedDeNovo_contig_127	6372
NorthernBobwhite_SimpleDeNovo_contig_36026	NorthernBobwhite_ScaffoldedDeNovo_contig_127	7488
NorthernBobwhite_SimpleDeNovo_contig_153	NorthernBobwhite_ScaffoldedDeNovo_contig_127	10253
NorthernBobwhite_SimpleDeNovo_contig_13703	NorthernBobwhite_ScaffoldedDeNovo_contig_127	14380
NorthernBobwhite_SimpleDeNovo_contig_13704	NorthernBobwhite_ScaffoldedDeNovo_contig_127	18408
NorthernBobwhite_SimpleDeNovo_contig_159024	NorthernBobwhite_ScaffoldedDeNovo_contig_127	19492
NorthernBobwhite_SimpleDeNovo_contig_159420	NorthernBobwhite_ScaffoldedDeNovo_contig_127	24731
NorthernBobwhite_SimpleDeNovo_contig_13933	NorthernBobwhite_ScaffoldedDeNovo_contig_127	27404
NorthernBobwhite_SimpleDeNovo_contig_13934	NorthernBobwhite_ScaffoldedDeNovo_contig_127	28976
NorthernBobwhite_SimpleDeNovo_contig_154	NorthernBobwhite_ScaffoldedDeNovo_contig_128	6431
NorthernBobwhite_SimpleDeNovo_contig_277523	NorthernBobwhite_ScaffoldedDeNovo_contig_129	20081
NorthernBobwhite_SimpleDeNovo_contig_120614	NorthernBobwhite_ScaffoldedDeNovo_contig_129	21391
NorthernBobwhite_SimpleDeNovo_contig_210270	NorthernBobwhite_ScaffoldedDeNovo_contig_129	24570
NorthernBobwhite_SimpleDeNovo_contig_206203	NorthernBobwhite_ScaffoldedDeNovo_contig_129	25377
NorthernBobwhite_SimpleDeNovo_contig_102803	NorthernBobwhite_ScaffoldedDeNovo_contig_129	39841
NorthernBobwhite_SimpleDeNovo_contig_145816	NorthernBobwhite_ScaffoldedDeNovo_contig_129	44057
NorthernBobwhite_SimpleDeNovo_contig_227683	NorthernBobwhite_ScaffoldedDeNovo_contig_129	47071
NorthernBobwhite_SimpleDeNovo_contig_33572	NorthernBobwhite_ScaffoldedDeNovo_contig_129	49740
NorthernBobwhite_SimpleDeNovo_contig_50886	NorthernBobwhite_ScaffoldedDeNovo_contig_129	52781
NorthernBobwhite_SimpleDeNovo_contig_139682	NorthernBobwhite_ScaffoldedDeNovo_contig_129	60717
NorthernBobwhite_SimpleDeNovo_contig_48747	NorthernBobwhite_ScaffoldedDeNovo_contig_129	62921
NorthernBobwhite_SimpleDeNovo_contig_109698	NorthernBobwhite_ScaffoldedDeNovo_contig_129	101566
NorthernBobwhite_SimpleDeNovo_contig_175854	NorthernBobwhite_ScaffoldedDeNovo_contig_129	104959
NorthernBobwhite_SimpleDeNovo_contig_77790	NorthernBobwhite_ScaffoldedDeNovo_contig_129	107373
NorthernBobwhite_SimpleDeNovo_contig_77789	NorthernBobwhite_ScaffoldedDeNovo_contig_129	112896
NorthernBobwhite_SimpleDeNovo_contig_15001	NorthernBobwhite_ScaffoldedDeNovo_contig_129	138223
NorthernBobwhite_SimpleDeNovo_contig_156563	NorthernBobwhite_ScaffoldedDeNovo_contig_129	140582
NorthernBobwhite_SimpleDeNovo_contig_81689	NorthernBobwhite_ScaffoldedDeNovo_contig_129	147317
NorthernBobwhite_SimpleDeNovo_contig_107723	NorthernBobwhite_ScaffoldedDeNovo_contig_129	155310
NorthernBobwhite_SimpleDeNovo_contig_79897	NorthernBobwhite_ScaffoldedDeNovo_contig_129	158726
NorthernBobwhite_SimpleDeNovo_contig_49306	NorthernBobwhite_ScaffoldedDeNovo_contig_129	160785
NorthernBobwhite_SimpleDeNovo_contig_112783	NorthernBobwhite_ScaffoldedDeNovo_contig_129	168803
NorthernBobwhite_SimpleDeNovo_contig_67981	NorthernBobwhite_ScaffoldedDeNovo_contig_129	176759
NorthernBobwhite_SimpleDeNovo_contig_103288	NorthernBobwhite_ScaffoldedDeNovo_contig_129	182499
NorthernBobwhite_SimpleDeNovo_contig_191718	NorthernBobwhite_ScaffoldedDeNovo_contig_129	183562
NorthernBobwhite_SimpleDeNovo_contig_90422	NorthernBobwhite_ScaffoldedDeNovo_contig_129	195043
NorthernBobwhite_SimpleDeNovo_contig_154566	NorthernBobwhite_ScaffoldedDeNovo_contig_129	199759
NorthernBobwhite_SimpleDeNovo_contig_10730	NorthernBobwhite_ScaffoldedDeNovo_contig_129	206489
NorthernBobwhite_SimpleDeNovo_contig_108036	NorthernBobwhite_ScaffoldedDeNovo_contig_129	211900
NorthernBobwhite_SimpleDeNovo_contig_143494	NorthernBobwhite_ScaffoldedDeNovo_contig_129	217452
NorthernBobwhite_SimpleDeNovo_contig_155	NorthernBobwhite_ScaffoldedDeNovo_contig_129	242614
NorthernBobwhite_SimpleDeNovo_contig_59831	NorthernBobwhite_ScaffoldedDeNovo_contig_129	244383
NorthernBobwhite_SimpleDeNovo_contig_34897	NorthernBobwhite_ScaffoldedDeNovo_contig_129	249127
NorthernBobwhite_SimpleDeNovo_contig_230836	NorthernBobwhite_ScaffoldedDeNovo_contig_129	252603
NorthernBobwhite_SimpleDeNovo_contig_124403	NorthernBobwhite_ScaffoldedDeNovo_contig_129	255583
NorthernBobwhite_SimpleDeNovo_contig_148241	NorthernBobwhite_ScaffoldedDeNovo_contig_129	261015
NorthernBobwhite_SimpleDeNovo_contig_212733	NorthernBobwhite_ScaffoldedDeNovo_contig_129	281479
NorthernBobwhite_SimpleDeNovo_contig_259342	NorthernBobwhite_ScaffoldedDeNovo_contig_129	282950
NorthernBobwhite_SimpleDeNovo_contig_102137	NorthernBobwhite_ScaffoldedDeNovo_contig_129	286306
NorthernBobwhite_SimpleDeNovo_contig_31858	NorthernBobwhite_ScaffoldedDeNovo_contig_129	303415
NorthernBobwhite_SimpleDeNovo_contig_159595	NorthernBobwhite_ScaffoldedDeNovo_contig_129	315214
NorthernBobwhite_SimpleDeNovo_contig_88615	NorthernBobwhite_ScaffoldedDeNovo_contig_129	319845
NorthernBobwhite_SimpleDeNovo_contig_32827	NorthernBobwhite_ScaffoldedDeNovo_contig_129	324114
NorthernBobwhite_SimpleDeNovo_contig_12794	NorthernBobwhite_ScaffoldedDeNovo_contig_130	1
NorthernBobwhite_SimpleDeNovo_contig_143279	NorthernBobwhite_ScaffoldedDeNovo_contig_130	6331
NorthernBobwhite_SimpleDeNovo_contig_156	NorthernBobwhite_ScaffoldedDeNovo_contig_130	10740
NorthernBobwhite_SimpleDeNovo_contig_45828	NorthernBobwhite_ScaffoldedDeNovo_contig_130	24245
NorthernBobwhite_SimpleDeNovo_contig_102330	NorthernBobwhite_ScaffoldedDeNovo_contig_130	29736
NorthernBobwhite_SimpleDeNovo_contig_62780	NorthernBobwhite_ScaffoldedDeNovo_contig_130	31855
NorthernBobwhite_SimpleDeNovo_contig_155107	NorthernBobwhite_ScaffoldedDeNovo_contig_131	1
NorthernBobwhite_SimpleDeNovo_contig_154014	NorthernBobwhite_ScaffoldedDeNovo_contig_131	4154
NorthernBobwhite_SimpleDeNovo_contig_116416	NorthernBobwhite_ScaffoldedDeNovo_contig_131	52473
NorthernBobwhite_SimpleDeNovo_contig_29042	NorthernBobwhite_ScaffoldedDeNovo_contig_131	56531
NorthernBobwhite_SimpleDeNovo_contig_58200	NorthernBobwhite_ScaffoldedDeNovo_contig_131	61418
NorthernBobwhite_SimpleDeNovo_contig_82503	NorthernBobwhite_ScaffoldedDeNovo_contig_131	66011
NorthernBobwhite_SimpleDeNovo_contig_160524	NorthernBobwhite_ScaffoldedDeNovo_contig_131	71937
NorthernBobwhite_SimpleDeNovo_contig_13978	NorthernBobwhite_ScaffoldedDeNovo_contig_131	76422
NorthernBobwhite_SimpleDeNovo_contig_79904	NorthernBobwhite_ScaffoldedDeNovo_contig_131	79277
NorthernBobwhite_SimpleDeNovo_contig_259819	NorthernBobwhite_ScaffoldedDeNovo_contig_131	88488
NorthernBobwhite_SimpleDeNovo_contig_142099	NorthernBobwhite_ScaffoldedDeNovo_contig_131	90287
NorthernBobwhite_SimpleDeNovo_contig_157	NorthernBobwhite_ScaffoldedDeNovo_contig_131	95866
NorthernBobwhite_SimpleDeNovo_contig_91994	NorthernBobwhite_ScaffoldedDeNovo_contig_131	101576
NorthernBobwhite_SimpleDeNovo_contig_91993	NorthernBobwhite_ScaffoldedDeNovo_contig_131	104890
NorthernBobwhite_SimpleDeNovo_contig_245663	NorthernBobwhite_ScaffoldedDeNovo_contig_131	115480
NorthernBobwhite_SimpleDeNovo_contig_71828	NorthernBobwhite_ScaffoldedDeNovo_contig_132	1
NorthernBobwhite_SimpleDeNovo_contig_71827	NorthernBobwhite_ScaffoldedDeNovo_contig_132	2807
NorthernBobwhite_SimpleDeNovo_contig_237612	NorthernBobwhite_ScaffoldedDeNovo_contig_132	19459
NorthernBobwhite_SimpleDeNovo_contig_33645	NorthernBobwhite_ScaffoldedDeNovo_contig_132	20564
NorthernBobwhite_SimpleDeNovo_contig_137704	NorthernBobwhite_ScaffoldedDeNovo_contig_132	30116
NorthernBobwhite_SimpleDeNovo_contig_273009	NorthernBobwhite_ScaffoldedDeNovo_contig_132	36868
NorthernBobwhite_SimpleDeNovo_contig_231118	NorthernBobwhite_ScaffoldedDeNovo_contig_132	39845
NorthernBobwhite_SimpleDeNovo_contig_139203	NorthernBobwhite_ScaffoldedDeNovo_contig_132	43271
NorthernBobwhite_SimpleDeNovo_contig_26218	NorthernBobwhite_ScaffoldedDeNovo_contig_132	45410
NorthernBobwhite_SimpleDeNovo_contig_215610	NorthernBobwhite_ScaffoldedDeNovo_contig_132	50462
NorthernBobwhite_SimpleDeNovo_contig_247352	NorthernBobwhite_ScaffoldedDeNovo_contig_132	65482
NorthernBobwhite_SimpleDeNovo_contig_129133	NorthernBobwhite_ScaffoldedDeNovo_contig_132	68595
NorthernBobwhite_SimpleDeNovo_contig_246023	NorthernBobwhite_ScaffoldedDeNovo_contig_132	75172
NorthernBobwhite_SimpleDeNovo_contig_174921	NorthernBobwhite_ScaffoldedDeNovo_contig_133	56263
NorthernBobwhite_SimpleDeNovo_contig_333454	NorthernBobwhite_ScaffoldedDeNovo_contig_133	81477
NorthernBobwhite_SimpleDeNovo_contig_5234	NorthernBobwhite_ScaffoldedDeNovo_contig_133	82254
NorthernBobwhite_SimpleDeNovo_contig_42079	NorthernBobwhite_ScaffoldedDeNovo_contig_133	168300
NorthernBobwhite_SimpleDeNovo_contig_49778	NorthernBobwhite_ScaffoldedDeNovo_contig_134	21326
NorthernBobwhite_SimpleDeNovo_contig_257582	NorthernBobwhite_ScaffoldedDeNovo_contig_134	22723
NorthernBobwhite_SimpleDeNovo_contig_81498	NorthernBobwhite_ScaffoldedDeNovo_contig_134	24160
NorthernBobwhite_SimpleDeNovo_contig_83324	NorthernBobwhite_ScaffoldedDeNovo_contig_134	30262
NorthernBobwhite_SimpleDeNovo_contig_197456	NorthernBobwhite_ScaffoldedDeNovo_contig_134	38562
NorthernBobwhite_SimpleDeNovo_contig_123258	NorthernBobwhite_ScaffoldedDeNovo_contig_134	45224
NorthernBobwhite_SimpleDeNovo_contig_159099	NorthernBobwhite_ScaffoldedDeNovo_contig_134	48319
NorthernBobwhite_SimpleDeNovo_contig_43921	NorthernBobwhite_ScaffoldedDeNovo_contig_134	50610
NorthernBobwhite_SimpleDeNovo_contig_43920	NorthernBobwhite_ScaffoldedDeNovo_contig_134	53855
NorthernBobwhite_SimpleDeNovo_contig_109853	NorthernBobwhite_ScaffoldedDeNovo_contig_134	58620
NorthernBobwhite_SimpleDeNovo_contig_178136	NorthernBobwhite_ScaffoldedDeNovo_contig_134	61121
NorthernBobwhite_SimpleDeNovo_contig_216509	NorthernBobwhite_ScaffoldedDeNovo_contig_134	65932
NorthernBobwhite_SimpleDeNovo_contig_128231	NorthernBobwhite_ScaffoldedDeNovo_contig_134	70169
NorthernBobwhite_SimpleDeNovo_contig_160	NorthernBobwhite_ScaffoldedDeNovo_contig_134	75563
NorthernBobwhite_SimpleDeNovo_contig_106072	NorthernBobwhite_ScaffoldedDeNovo_contig_134	79924
NorthernBobwhite_SimpleDeNovo_contig_208960	NorthernBobwhite_ScaffoldedDeNovo_contig_134	86836
NorthernBobwhite_SimpleDeNovo_contig_251615	NorthernBobwhite_ScaffoldedDeNovo_contig_134	90314
NorthernBobwhite_SimpleDeNovo_contig_196515	NorthernBobwhite_ScaffoldedDeNovo_contig_134	93029
NorthernBobwhite_SimpleDeNovo_contig_187968	NorthernBobwhite_ScaffoldedDeNovo_contig_134	94927
NorthernBobwhite_SimpleDeNovo_contig_188798	NorthernBobwhite_ScaffoldedDeNovo_contig_134	98077
NorthernBobwhite_SimpleDeNovo_contig_244603	NorthernBobwhite_ScaffoldedDeNovo_contig_134	100824
NorthernBobwhite_SimpleDeNovo_contig_129406	NorthernBobwhite_ScaffoldedDeNovo_contig_134	102891
NorthernBobwhite_SimpleDeNovo_contig_83073	NorthernBobwhite_ScaffoldedDeNovo_contig_134	110927
NorthernBobwhite_SimpleDeNovo_contig_167486	NorthernBobwhite_ScaffoldedDeNovo_contig_135	1
NorthernBobwhite_SimpleDeNovo_contig_21421	NorthernBobwhite_ScaffoldedDeNovo_contig_135	7234
NorthernBobwhite_SimpleDeNovo_contig_162	NorthernBobwhite_ScaffoldedDeNovo_contig_136	1
NorthernBobwhite_SimpleDeNovo_contig_185620	NorthernBobwhite_ScaffoldedDeNovo_contig_137	1
NorthernBobwhite_SimpleDeNovo_contig_22839	NorthernBobwhite_ScaffoldedDeNovo_contig_137	2990
NorthernBobwhite_SimpleDeNovo_contig_281772	NorthernBobwhite_ScaffoldedDeNovo_contig_137	6723
NorthernBobwhite_SimpleDeNovo_contig_77566	NorthernBobwhite_ScaffoldedDeNovo_contig_137	8746
NorthernBobwhite_SimpleDeNovo_contig_203704	NorthernBobwhite_ScaffoldedDeNovo_contig_137	11988
NorthernBobwhite_SimpleDeNovo_contig_32983	NorthernBobwhite_ScaffoldedDeNovo_contig_137	13102
NorthernBobwhite_SimpleDeNovo_contig_33167	NorthernBobwhite_ScaffoldedDeNovo_contig_137	17151
NorthernBobwhite_SimpleDeNovo_contig_48818	NorthernBobwhite_ScaffoldedDeNovo_contig_137	31963
NorthernBobwhite_SimpleDeNovo_contig_137183	NorthernBobwhite_ScaffoldedDeNovo_contig_137	37796
NorthernBobwhite_SimpleDeNovo_contig_216675	NorthernBobwhite_ScaffoldedDeNovo_contig_137	40317
NorthernBobwhite_SimpleDeNovo_contig_137184	NorthernBobwhite_ScaffoldedDeNovo_contig_137	42032
NorthernBobwhite_SimpleDeNovo_contig_126844	NorthernBobwhite_ScaffoldedDeNovo_contig_137	43769
NorthernBobwhite_SimpleDeNovo_contig_139734	NorthernBobwhite_ScaffoldedDeNovo_contig_137	50112
NorthernBobwhite_SimpleDeNovo_contig_139733	NorthernBobwhite_ScaffoldedDeNovo_contig_137	53299
NorthernBobwhite_SimpleDeNovo_contig_229075	NorthernBobwhite_ScaffoldedDeNovo_contig_137	56755
NorthernBobwhite_SimpleDeNovo_contig_169873	NorthernBobwhite_ScaffoldedDeNovo_contig_137	59534
NorthernBobwhite_SimpleDeNovo_contig_181601	NorthernBobwhite_ScaffoldedDeNovo_contig_137	73749
NorthernBobwhite_SimpleDeNovo_contig_51389	NorthernBobwhite_ScaffoldedDeNovo_contig_137	79630
NorthernBobwhite_SimpleDeNovo_contig_144201	NorthernBobwhite_ScaffoldedDeNovo_contig_137	93590
NorthernBobwhite_SimpleDeNovo_contig_42259	NorthernBobwhite_ScaffoldedDeNovo_contig_137	96868
NorthernBobwhite_SimpleDeNovo_contig_38154	NorthernBobwhite_ScaffoldedDeNovo_contig_137	105544
NorthernBobwhite_SimpleDeNovo_contig_160504	NorthernBobwhite_ScaffoldedDeNovo_contig_137	113665
NorthernBobwhite_SimpleDeNovo_contig_84485	NorthernBobwhite_ScaffoldedDeNovo_contig_137	118120
NorthernBobwhite_SimpleDeNovo_contig_67038	NorthernBobwhite_ScaffoldedDeNovo_contig_137	120676
NorthernBobwhite_SimpleDeNovo_contig_67037	NorthernBobwhite_ScaffoldedDeNovo_contig_137	126053
NorthernBobwhite_SimpleDeNovo_contig_163	NorthernBobwhite_ScaffoldedDeNovo_contig_137	151677
NorthernBobwhite_SimpleDeNovo_contig_73868	NorthernBobwhite_ScaffoldedDeNovo_contig_139	23482
NorthernBobwhite_SimpleDeNovo_contig_229759	NorthernBobwhite_ScaffoldedDeNovo_contig_139	45762
NorthernBobwhite_SimpleDeNovo_contig_184882	NorthernBobwhite_ScaffoldedDeNovo_contig_139	56569
NorthernBobwhite_SimpleDeNovo_contig_63079	NorthernBobwhite_ScaffoldedDeNovo_contig_139	58424
NorthernBobwhite_SimpleDeNovo_contig_368251	NorthernBobwhite_ScaffoldedDeNovo_contig_140	5180
NorthernBobwhite_SimpleDeNovo_contig_328940	NorthernBobwhite_ScaffoldedDeNovo_contig_140	13077
NorthernBobwhite_SimpleDeNovo_contig_212743	NorthernBobwhite_ScaffoldedDeNovo_contig_141	1
NorthernBobwhite_SimpleDeNovo_contig_30853	NorthernBobwhite_ScaffoldedDeNovo_contig_141	1381
NorthernBobwhite_SimpleDeNovo_contig_30854	NorthernBobwhite_ScaffoldedDeNovo_contig_141	4075
NorthernBobwhite_SimpleDeNovo_contig_55132	NorthernBobwhite_ScaffoldedDeNovo_contig_141	10105
NorthernBobwhite_SimpleDeNovo_contig_94854	NorthernBobwhite_ScaffoldedDeNovo_contig_141	17503
NorthernBobwhite_SimpleDeNovo_contig_82980	NorthernBobwhite_ScaffoldedDeNovo_contig_141	23599
NorthernBobwhite_SimpleDeNovo_contig_94210	NorthernBobwhite_ScaffoldedDeNovo_contig_141	44870
NorthernBobwhite_SimpleDeNovo_contig_77906	NorthernBobwhite_ScaffoldedDeNovo_contig_141	46274
NorthernBobwhite_SimpleDeNovo_contig_247943	NorthernBobwhite_ScaffoldedDeNovo_contig_141	63036
NorthernBobwhite_SimpleDeNovo_contig_137	NorthernBobwhite_ScaffoldedDeNovo_contig_141	64900
NorthernBobwhite_SimpleDeNovo_contig_35589	NorthernBobwhite_ScaffoldedDeNovo_contig_141	71635
NorthernBobwhite_SimpleDeNovo_contig_39974	NorthernBobwhite_ScaffoldedDeNovo_contig_142	1
NorthernBobwhite_SimpleDeNovo_contig_164432	NorthernBobwhite_ScaffoldedDeNovo_contig_142	1433
NorthernBobwhite_SimpleDeNovo_contig_319813	NorthernBobwhite_ScaffoldedDeNovo_contig_142	8009
NorthernBobwhite_SimpleDeNovo_contig_241305	NorthernBobwhite_ScaffoldedDeNovo_contig_142	9388
NorthernBobwhite_SimpleDeNovo_contig_37780	NorthernBobwhite_ScaffoldedDeNovo_contig_142	11328
NorthernBobwhite_SimpleDeNovo_contig_143748	NorthernBobwhite_ScaffoldedDeNovo_contig_142	19110
NorthernBobwhite_SimpleDeNovo_contig_246522	NorthernBobwhite_ScaffoldedDeNovo_contig_142	21746
NorthernBobwhite_SimpleDeNovo_contig_180103	NorthernBobwhite_ScaffoldedDeNovo_contig_142	40609
NorthernBobwhite_SimpleDeNovo_contig_30208	NorthernBobwhite_ScaffoldedDeNovo_contig_142	44127
NorthernBobwhite_SimpleDeNovo_contig_89622	NorthernBobwhite_ScaffoldedDeNovo_contig_142	45902
NorthernBobwhite_SimpleDeNovo_contig_212387	NorthernBobwhite_ScaffoldedDeNovo_contig_142	49258
NorthernBobwhite_SimpleDeNovo_contig_58061	NorthernBobwhite_ScaffoldedDeNovo_contig_142	56229
NorthernBobwhite_SimpleDeNovo_contig_208754	NorthernBobwhite_ScaffoldedDeNovo_contig_142	60459
NorthernBobwhite_SimpleDeNovo_contig_83264	NorthernBobwhite_ScaffoldedDeNovo_contig_142	64952
NorthernBobwhite_SimpleDeNovo_contig_226841	NorthernBobwhite_ScaffoldedDeNovo_contig_142	79847
NorthernBobwhite_SimpleDeNovo_contig_249624	NorthernBobwhite_ScaffoldedDeNovo_contig_142	83824
NorthernBobwhite_SimpleDeNovo_contig_7933	NorthernBobwhite_ScaffoldedDeNovo_contig_142	86466
NorthernBobwhite_SimpleDeNovo_contig_138	NorthernBobwhite_ScaffoldedDeNovo_contig_143	1
NorthernBobwhite_SimpleDeNovo_contig_41127	NorthernBobwhite_ScaffoldedDeNovo_contig_144	1
NorthernBobwhite_SimpleDeNovo_contig_41126	NorthernBobwhite_ScaffoldedDeNovo_contig_144	2529
NorthernBobwhite_SimpleDeNovo_contig_63029	NorthernBobwhite_ScaffoldedDeNovo_contig_144	4347
NorthernBobwhite_SimpleDeNovo_contig_56600	NorthernBobwhite_ScaffoldedDeNovo_contig_144	17060
NorthernBobwhite_SimpleDeNovo_contig_159922	NorthernBobwhite_ScaffoldedDeNovo_contig_144	18678
NorthernBobwhite_SimpleDeNovo_contig_34175	NorthernBobwhite_ScaffoldedDeNovo_contig_144	23145
NorthernBobwhite_SimpleDeNovo_contig_43587	NorthernBobwhite_ScaffoldedDeNovo_contig_144	43041
NorthernBobwhite_SimpleDeNovo_contig_109645	NorthernBobwhite_ScaffoldedDeNovo_contig_144	48081
NorthernBobwhite_SimpleDeNovo_contig_265532	NorthernBobwhite_ScaffoldedDeNovo_contig_144	52937
NorthernBobwhite_SimpleDeNovo_contig_33082	NorthernBobwhite_ScaffoldedDeNovo_contig_144	69429
NorthernBobwhite_SimpleDeNovo_contig_16011	NorthernBobwhite_ScaffoldedDeNovo_contig_144	73380
NorthernBobwhite_SimpleDeNovo_contig_16012	NorthernBobwhite_ScaffoldedDeNovo_contig_144	76745
NorthernBobwhite_SimpleDeNovo_contig_75612	NorthernBobwhite_ScaffoldedDeNovo_contig_144	79267
NorthernBobwhite_SimpleDeNovo_contig_12839	NorthernBobwhite_ScaffoldedDeNovo_contig_144	86722
NorthernBobwhite_SimpleDeNovo_contig_102409	NorthernBobwhite_ScaffoldedDeNovo_contig_144	93345
NorthernBobwhite_SimpleDeNovo_contig_102410	NorthernBobwhite_ScaffoldedDeNovo_contig_144	96296
NorthernBobwhite_SimpleDeNovo_contig_158379	NorthernBobwhite_ScaffoldedDeNovo_contig_144	98786
NorthernBobwhite_SimpleDeNovo_contig_296469	NorthernBobwhite_ScaffoldedDeNovo_contig_144	104473
NorthernBobwhite_SimpleDeNovo_contig_18534	NorthernBobwhite_ScaffoldedDeNovo_contig_144	105572
NorthernBobwhite_SimpleDeNovo_contig_162615	NorthernBobwhite_ScaffoldedDeNovo_contig_144	107677
NorthernBobwhite_SimpleDeNovo_contig_82690	NorthernBobwhite_ScaffoldedDeNovo_contig_144	111459
NorthernBobwhite_SimpleDeNovo_contig_316551	NorthernBobwhite_ScaffoldedDeNovo_contig_145	1
NorthernBobwhite_SimpleDeNovo_contig_152213	NorthernBobwhite_ScaffoldedDeNovo_contig_145	19314
NorthernBobwhite_SimpleDeNovo_contig_91353	NorthernBobwhite_ScaffoldedDeNovo_contig_145	20100
NorthernBobwhite_SimpleDeNovo_contig_172379	NorthernBobwhite_ScaffoldedDeNovo_contig_145	39590
NorthernBobwhite_SimpleDeNovo_contig_192033	NorthernBobwhite_ScaffoldedDeNovo_contig_145	44004
NorthernBobwhite_SimpleDeNovo_contig_192034	NorthernBobwhite_ScaffoldedDeNovo_contig_145	46646
NorthernBobwhite_SimpleDeNovo_contig_101374	NorthernBobwhite_ScaffoldedDeNovo_contig_145	47637
NorthernBobwhite_SimpleDeNovo_contig_131841	NorthernBobwhite_ScaffoldedDeNovo_contig_145	51455
NorthernBobwhite_SimpleDeNovo_contig_5806	NorthernBobwhite_ScaffoldedDeNovo_contig_145	56909
NorthernBobwhite_SimpleDeNovo_contig_65881	NorthernBobwhite_ScaffoldedDeNovo_contig_145	63730
NorthernBobwhite_SimpleDeNovo_contig_141	NorthernBobwhite_ScaffoldedDeNovo_contig_146	1
NorthernBobwhite_SimpleDeNovo_contig_131923	NorthernBobwhite_ScaffoldedDeNovo_contig_146	2727
NorthernBobwhite_SimpleDeNovo_contig_3711	NorthernBobwhite_ScaffoldedDeNovo_contig_147	1
NorthernBobwhite_SimpleDeNovo_contig_128237	NorthernBobwhite_ScaffoldedDeNovo_contig_147	1185
NorthernBobwhite_SimpleDeNovo_contig_77837	NorthernBobwhite_ScaffoldedDeNovo_contig_147	4536
NorthernBobwhite_SimpleDeNovo_contig_210137	NorthernBobwhite_ScaffoldedDeNovo_contig_147	8638
NorthernBobwhite_SimpleDeNovo_contig_10008	NorthernBobwhite_ScaffoldedDeNovo_contig_147	10708
NorthernBobwhite_SimpleDeNovo_contig_67168	NorthernBobwhite_ScaffoldedDeNovo_contig_147	13484
NorthernBobwhite_SimpleDeNovo_contig_91189	NorthernBobwhite_ScaffoldedDeNovo_contig_147	17571
NorthernBobwhite_SimpleDeNovo_contig_248101	NorthernBobwhite_ScaffoldedDeNovo_contig_147	19770
NorthernBobwhite_SimpleDeNovo_contig_243272	NorthernBobwhite_ScaffoldedDeNovo_contig_147	22285
NorthernBobwhite_SimpleDeNovo_contig_243273	NorthernBobwhite_ScaffoldedDeNovo_contig_147	24770
NorthernBobwhite_SimpleDeNovo_contig_211778	NorthernBobwhite_ScaffoldedDeNovo_contig_147	27463
NorthernBobwhite_SimpleDeNovo_contig_87440	NorthernBobwhite_ScaffoldedDeNovo_contig_147	28827
NorthernBobwhite_SimpleDeNovo_contig_37358	NorthernBobwhite_ScaffoldedDeNovo_contig_147	36200
NorthernBobwhite_SimpleDeNovo_contig_84309	NorthernBobwhite_ScaffoldedDeNovo_contig_147	39278
NorthernBobwhite_SimpleDeNovo_contig_125172	NorthernBobwhite_ScaffoldedDeNovo_contig_147	41345
NorthernBobwhite_SimpleDeNovo_contig_307132	NorthernBobwhite_ScaffoldedDeNovo_contig_147	43280
NorthernBobwhite_SimpleDeNovo_contig_106032	NorthernBobwhite_ScaffoldedDeNovo_contig_147	44280
NorthernBobwhite_SimpleDeNovo_contig_154247	NorthernBobwhite_ScaffoldedDeNovo_contig_147	50785
NorthernBobwhite_SimpleDeNovo_contig_173675	NorthernBobwhite_ScaffoldedDeNovo_contig_147	55841
NorthernBobwhite_SimpleDeNovo_contig_92458	NorthernBobwhite_ScaffoldedDeNovo_contig_147	68857
NorthernBobwhite_SimpleDeNovo_contig_22252	NorthernBobwhite_ScaffoldedDeNovo_contig_147	73158
NorthernBobwhite_SimpleDeNovo_contig_37052	NorthernBobwhite_ScaffoldedDeNovo_contig_147	80333
NorthernBobwhite_SimpleDeNovo_contig_257013	NorthernBobwhite_ScaffoldedDeNovo_contig_147	83266
NorthernBobwhite_SimpleDeNovo_contig_185467	NorthernBobwhite_ScaffoldedDeNovo_contig_147	95892
NorthernBobwhite_SimpleDeNovo_contig_168639	NorthernBobwhite_ScaffoldedDeNovo_contig_147	101325
NorthernBobwhite_SimpleDeNovo_contig_142	NorthernBobwhite_ScaffoldedDeNovo_contig_147	104941
NorthernBobwhite_SimpleDeNovo_contig_77978	NorthernBobwhite_ScaffoldedDeNovo_contig_147	106182
NorthernBobwhite_SimpleDeNovo_contig_127127	NorthernBobwhite_ScaffoldedDeNovo_contig_147	111723
NorthernBobwhite_SimpleDeNovo_contig_46506	NorthernBobwhite_ScaffoldedDeNovo_contig_147	130906
NorthernBobwhite_SimpleDeNovo_contig_41669	NorthernBobwhite_ScaffoldedDeNovo_contig_147	133430
NorthernBobwhite_SimpleDeNovo_contig_94307	NorthernBobwhite_ScaffoldedDeNovo_contig_147	142381
NorthernBobwhite_SimpleDeNovo_contig_211406	NorthernBobwhite_ScaffoldedDeNovo_contig_147	145225
NorthernBobwhite_SimpleDeNovo_contig_97771	NorthernBobwhite_ScaffoldedDeNovo_contig_147	145909
NorthernBobwhite_SimpleDeNovo_contig_130020	NorthernBobwhite_ScaffoldedDeNovo_contig_147	147532
NorthernBobwhite_SimpleDeNovo_contig_248575	NorthernBobwhite_ScaffoldedDeNovo_contig_147	152903
NorthernBobwhite_SimpleDeNovo_contig_329802	NorthernBobwhite_ScaffoldedDeNovo_contig_148	13036
NorthernBobwhite_SimpleDeNovo_contig_333225	NorthernBobwhite_ScaffoldedDeNovo_contig_148	13036
NorthernBobwhite_SimpleDeNovo_contig_153584	NorthernBobwhite_ScaffoldedDeNovo_contig_148	13350
NorthernBobwhite_SimpleDeNovo_contig_125445	NorthernBobwhite_ScaffoldedDeNovo_contig_148	32182
NorthernBobwhite_SimpleDeNovo_contig_225390	NorthernBobwhite_ScaffoldedDeNovo_contig_148	34068
NorthernBobwhite_SimpleDeNovo_contig_257731	NorthernBobwhite_ScaffoldedDeNovo_contig_148	39922
NorthernBobwhite_SimpleDeNovo_contig_36574	NorthernBobwhite_ScaffoldedDeNovo_contig_148	55229
NorthernBobwhite_SimpleDeNovo_contig_89788	NorthernBobwhite_ScaffoldedDeNovo_contig_148	59238
NorthernBobwhite_SimpleDeNovo_contig_124230	NorthernBobwhite_ScaffoldedDeNovo_contig_148	63508
NorthernBobwhite_SimpleDeNovo_contig_12237	NorthernBobwhite_ScaffoldedDeNovo_contig_148	66773
NorthernBobwhite_SimpleDeNovo_contig_12024	NorthernBobwhite_ScaffoldedDeNovo_contig_148	73544
NorthernBobwhite_SimpleDeNovo_contig_154795	NorthernBobwhite_ScaffoldedDeNovo_contig_149	1
NorthernBobwhite_SimpleDeNovo_contig_354655	NorthernBobwhite_ScaffoldedDeNovo_contig_149	13979
NorthernBobwhite_SimpleDeNovo_contig_337317	NorthernBobwhite_ScaffoldedDeNovo_contig_149	14328
NorthernBobwhite_SimpleDeNovo_contig_18575	NorthernBobwhite_ScaffoldedDeNovo_contig_149	14752
NorthernBobwhite_SimpleDeNovo_contig_333113	NorthernBobwhite_ScaffoldedDeNovo_contig_149	15286
NorthernBobwhite_SimpleDeNovo_contig_42993	NorthernBobwhite_ScaffoldedDeNovo_contig_150	1
NorthernBobwhite_SimpleDeNovo_contig_50165	NorthernBobwhite_ScaffoldedDeNovo_contig_150	4134
NorthernBobwhite_SimpleDeNovo_contig_158025	NorthernBobwhite_ScaffoldedDeNovo_contig_150	10259
NorthernBobwhite_SimpleDeNovo_contig_194967	NorthernBobwhite_ScaffoldedDeNovo_contig_150	14494
NorthernBobwhite_SimpleDeNovo_contig_156242	NorthernBobwhite_ScaffoldedDeNovo_contig_150	18124
NorthernBobwhite_SimpleDeNovo_contig_145	NorthernBobwhite_ScaffoldedDeNovo_contig_150	29186
NorthernBobwhite_SimpleDeNovo_contig_228220	NorthernBobwhite_ScaffoldedDeNovo_contig_150	34598
NorthernBobwhite_SimpleDeNovo_contig_6615	NorthernBobwhite_ScaffoldedDeNovo_contig_150	36744
NorthernBobwhite_SimpleDeNovo_contig_95568	NorthernBobwhite_ScaffoldedDeNovo_contig_150	53711
NorthernBobwhite_SimpleDeNovo_contig_100850	NorthernBobwhite_ScaffoldedDeNovo_contig_151	1
NorthernBobwhite_SimpleDeNovo_contig_17109	NorthernBobwhite_ScaffoldedDeNovo_contig_151	5616
NorthernBobwhite_SimpleDeNovo_contig_17110	NorthernBobwhite_ScaffoldedDeNovo_contig_151	11842
NorthernBobwhite_SimpleDeNovo_contig_103524	NorthernBobwhite_ScaffoldedDeNovo_contig_151	14510
NorthernBobwhite_SimpleDeNovo_contig_216594	NorthernBobwhite_ScaffoldedDeNovo_contig_151	27686
NorthernBobwhite_SimpleDeNovo_contig_331284	NorthernBobwhite_ScaffoldedDeNovo_contig_151	31172
NorthernBobwhite_SimpleDeNovo_contig_196698	NorthernBobwhite_ScaffoldedDeNovo_contig_151	31684
NorthernBobwhite_SimpleDeNovo_contig_114554	NorthernBobwhite_ScaffoldedDeNovo_contig_151	34326
NorthernBobwhite_SimpleDeNovo_contig_138478	NorthernBobwhite_ScaffoldedDeNovo_contig_151	41003
NorthernBobwhite_SimpleDeNovo_contig_129472	NorthernBobwhite_ScaffoldedDeNovo_contig_151	44182
NorthernBobwhite_SimpleDeNovo_contig_153796	NorthernBobwhite_ScaffoldedDeNovo_contig_151	46801
NorthernBobwhite_SimpleDeNovo_contig_146	NorthernBobwhite_ScaffoldedDeNovo_contig_151	48451
NorthernBobwhite_SimpleDeNovo_contig_38275	NorthernBobwhite_ScaffoldedDeNovo_contig_151	50551
NorthernBobwhite_SimpleDeNovo_contig_281967	NorthernBobwhite_ScaffoldedDeNovo_contig_151	54776
NorthernBobwhite_SimpleDeNovo_contig_300619	NorthernBobwhite_ScaffoldedDeNovo_contig_151	57396
NorthernBobwhite_SimpleDeNovo_contig_228815	NorthernBobwhite_ScaffoldedDeNovo_contig_151	61118
NorthernBobwhite_SimpleDeNovo_contig_66255	NorthernBobwhite_ScaffoldedDeNovo_contig_151	62279
NorthernBobwhite_SimpleDeNovo_contig_130867	NorthernBobwhite_ScaffoldedDeNovo_contig_151	71116
NorthernBobwhite_SimpleDeNovo_contig_200951	NorthernBobwhite_ScaffoldedDeNovo_contig_151	86599
NorthernBobwhite_SimpleDeNovo_contig_177305	NorthernBobwhite_ScaffoldedDeNovo_contig_151	91951
NorthernBobwhite_SimpleDeNovo_contig_301495	NorthernBobwhite_ScaffoldedDeNovo_contig_151	94467
NorthernBobwhite_SimpleDeNovo_contig_22712	NorthernBobwhite_ScaffoldedDeNovo_contig_151	95923
NorthernBobwhite_SimpleDeNovo_contig_18561	NorthernBobwhite_ScaffoldedDeNovo_contig_152	1
NorthernBobwhite_SimpleDeNovo_contig_132570	NorthernBobwhite_ScaffoldedDeNovo_contig_152	4902
NorthernBobwhite_SimpleDeNovo_contig_190539	NorthernBobwhite_ScaffoldedDeNovo_contig_152	8439
NorthernBobwhite_SimpleDeNovo_contig_162795	NorthernBobwhite_ScaffoldedDeNovo_contig_152	15565
NorthernBobwhite_SimpleDeNovo_contig_147	NorthernBobwhite_ScaffoldedDeNovo_contig_152	17796
NorthernBobwhite_SimpleDeNovo_contig_165747	NorthernBobwhite_ScaffoldedDeNovo_contig_153	1
NorthernBobwhite_SimpleDeNovo_contig_189537	NorthernBobwhite_ScaffoldedDeNovo_contig_153	4090
NorthernBobwhite_SimpleDeNovo_contig_179637	NorthernBobwhite_ScaffoldedDeNovo_contig_153	5414
NorthernBobwhite_SimpleDeNovo_contig_267549	NorthernBobwhite_ScaffoldedDeNovo_contig_153	8901
NorthernBobwhite_SimpleDeNovo_contig_40919	NorthernBobwhite_ScaffoldedDeNovo_contig_153	10409
NorthernBobwhite_SimpleDeNovo_contig_148	NorthernBobwhite_ScaffoldedDeNovo_contig_153	21981
NorthernBobwhite_SimpleDeNovo_contig_193169	NorthernBobwhite_ScaffoldedDeNovo_contig_153	27936
NorthernBobwhite_SimpleDeNovo_contig_175926	NorthernBobwhite_ScaffoldedDeNovo_contig_153	30158
NorthernBobwhite_SimpleDeNovo_contig_176770	NorthernBobwhite_ScaffoldedDeNovo_contig_153	34444
NorthernBobwhite_SimpleDeNovo_contig_203733	NorthernBobwhite_ScaffoldedDeNovo_contig_153	36896
NorthernBobwhite_SimpleDeNovo_contig_145010	NorthernBobwhite_ScaffoldedDeNovo_contig_153	39015
NorthernBobwhite_SimpleDeNovo_contig_110852	NorthernBobwhite_ScaffoldedDeNovo_contig_153	43517
NorthernBobwhite_SimpleDeNovo_contig_279704	NorthernBobwhite_ScaffoldedDeNovo_contig_153	57909
NorthernBobwhite_SimpleDeNovo_contig_108270	NorthernBobwhite_ScaffoldedDeNovo_contig_153	61347
NorthernBobwhite_SimpleDeNovo_contig_95446	NorthernBobwhite_ScaffoldedDeNovo_contig_153	66963
NorthernBobwhite_SimpleDeNovo_contig_222567	NorthernBobwhite_ScaffoldedDeNovo_contig_154	1
NorthernBobwhite_SimpleDeNovo_contig_109909	NorthernBobwhite_ScaffoldedDeNovo_contig_154	2440
NorthernBobwhite_SimpleDeNovo_contig_93472	NorthernBobwhite_ScaffoldedDeNovo_contig_154	26360
NorthernBobwhite_SimpleDeNovo_contig_86591	NorthernBobwhite_ScaffoldedDeNovo_contig_155	1
NorthernBobwhite_SimpleDeNovo_contig_97151	NorthernBobwhite_ScaffoldedDeNovo_contig_155	6802
NorthernBobwhite_SimpleDeNovo_contig_150	NorthernBobwhite_ScaffoldedDeNovo_contig_155	11641
NorthernBobwhite_SimpleDeNovo_contig_186735	NorthernBobwhite_ScaffoldedDeNovo_contig_155	14316
NorthernBobwhite_SimpleDeNovo_contig_26228	NorthernBobwhite_ScaffoldedDeNovo_contig_155	18584
NorthernBobwhite_SimpleDeNovo_contig_157336	NorthernBobwhite_ScaffoldedDeNovo_contig_155	21347
NorthernBobwhite_SimpleDeNovo_contig_117665	NorthernBobwhite_ScaffoldedDeNovo_contig_155	22799
NorthernBobwhite_SimpleDeNovo_contig_117666	NorthernBobwhite_ScaffoldedDeNovo_contig_155	24408
NorthernBobwhite_SimpleDeNovo_contig_60609	NorthernBobwhite_ScaffoldedDeNovo_contig_155	31845
NorthernBobwhite_SimpleDeNovo_contig_45614	NorthernBobwhite_ScaffoldedDeNovo_contig_155	36485
NorthernBobwhite_SimpleDeNovo_contig_28415	NorthernBobwhite_ScaffoldedDeNovo_contig_155	38924
NorthernBobwhite_SimpleDeNovo_contig_310047	NorthernBobwhite_ScaffoldedDeNovo_contig_155	42103
NorthernBobwhite_SimpleDeNovo_contig_18616	NorthernBobwhite_ScaffoldedDeNovo_contig_156	869
NorthernBobwhite_SimpleDeNovo_contig_67044	NorthernBobwhite_ScaffoldedDeNovo_contig_156	26687
NorthernBobwhite_SimpleDeNovo_contig_59667	NorthernBobwhite_ScaffoldedDeNovo_contig_156	33294
NorthernBobwhite_SimpleDeNovo_contig_83909	NorthernBobwhite_ScaffoldedDeNovo_contig_156	33560
NorthernBobwhite_SimpleDeNovo_contig_199938	NorthernBobwhite_ScaffoldedDeNovo_contig_157	1
NorthernBobwhite_SimpleDeNovo_contig_148432	NorthernBobwhite_ScaffoldedDeNovo_contig_157	4239
NorthernBobwhite_SimpleDeNovo_contig_103028	NorthernBobwhite_ScaffoldedDeNovo_contig_157	8088
NorthernBobwhite_SimpleDeNovo_contig_205849	NorthernBobwhite_ScaffoldedDeNovo_contig_157	15720
NorthernBobwhite_SimpleDeNovo_contig_205848	NorthernBobwhite_ScaffoldedDeNovo_contig_157	19137
NorthernBobwhite_SimpleDeNovo_contig_83737	NorthernBobwhite_ScaffoldedDeNovo_contig_157	21329
NorthernBobwhite_SimpleDeNovo_contig_126097	NorthernBobwhite_ScaffoldedDeNovo_contig_157	24527
NorthernBobwhite_SimpleDeNovo_contig_75961	NorthernBobwhite_ScaffoldedDeNovo_contig_157	26480
NorthernBobwhite_SimpleDeNovo_contig_75960	NorthernBobwhite_ScaffoldedDeNovo_contig_157	29320
NorthernBobwhite_SimpleDeNovo_contig_79237	NorthernBobwhite_ScaffoldedDeNovo_contig_157	31215
NorthernBobwhite_SimpleDeNovo_contig_162824	NorthernBobwhite_ScaffoldedDeNovo_contig_157	33670
NorthernBobwhite_SimpleDeNovo_contig_32771	NorthernBobwhite_ScaffoldedDeNovo_contig_157	38399
NorthernBobwhite_SimpleDeNovo_contig_277115	NorthernBobwhite_ScaffoldedDeNovo_contig_157	67233
NorthernBobwhite_SimpleDeNovo_contig_73531	NorthernBobwhite_ScaffoldedDeNovo_contig_157	70140
NorthernBobwhite_SimpleDeNovo_contig_1249	NorthernBobwhite_ScaffoldedDeNovo_contig_159	1
NorthernBobwhite_SimpleDeNovo_contig_82618	NorthernBobwhite_ScaffoldedDeNovo_contig_159	4550
NorthernBobwhite_SimpleDeNovo_contig_193	NorthernBobwhite_ScaffoldedDeNovo_contig_159	6731
NorthernBobwhite_SimpleDeNovo_contig_217742	NorthernBobwhite_ScaffoldedDeNovo_contig_160	36524
NorthernBobwhite_SimpleDeNovo_contig_245	NorthernBobwhite_ScaffoldedDeNovo_contig_160	45207
NorthernBobwhite_SimpleDeNovo_contig_247	NorthernBobwhite_ScaffoldedDeNovo_contig_161	1
NorthernBobwhite_SimpleDeNovo_contig_158337	NorthernBobwhite_ScaffoldedDeNovo_contig_161	6163
NorthernBobwhite_SimpleDeNovo_contig_30334	NorthernBobwhite_ScaffoldedDeNovo_contig_161	9499
NorthernBobwhite_SimpleDeNovo_contig_30333	NorthernBobwhite_ScaffoldedDeNovo_contig_161	13202
NorthernBobwhite_SimpleDeNovo_contig_233493	NorthernBobwhite_ScaffoldedDeNovo_contig_161	31943
NorthernBobwhite_SimpleDeNovo_contig_37791	NorthernBobwhite_ScaffoldedDeNovo_contig_161	33254
NorthernBobwhite_SimpleDeNovo_contig_138673	NorthernBobwhite_ScaffoldedDeNovo_contig_161	40656
NorthernBobwhite_SimpleDeNovo_contig_45189	NorthernBobwhite_ScaffoldedDeNovo_contig_161	43447
NorthernBobwhite_SimpleDeNovo_contig_72495	NorthernBobwhite_ScaffoldedDeNovo_contig_161	49917
NorthernBobwhite_SimpleDeNovo_contig_183889	NorthernBobwhite_ScaffoldedDeNovo_contig_161	55012
NorthernBobwhite_SimpleDeNovo_contig_227620	NorthernBobwhite_ScaffoldedDeNovo_contig_161	58881
NorthernBobwhite_SimpleDeNovo_contig_183890	NorthernBobwhite_ScaffoldedDeNovo_contig_161	59973
NorthernBobwhite_SimpleDeNovo_contig_142699	NorthernBobwhite_ScaffoldedDeNovo_contig_161	62427
NorthernBobwhite_SimpleDeNovo_contig_47654	NorthernBobwhite_ScaffoldedDeNovo_contig_162	138686
NorthernBobwhite_SimpleDeNovo_contig_249	NorthernBobwhite_ScaffoldedDeNovo_contig_163	1
NorthernBobwhite_SimpleDeNovo_contig_41965	NorthernBobwhite_ScaffoldedDeNovo_contig_164	1
NorthernBobwhite_SimpleDeNovo_contig_35750	NorthernBobwhite_ScaffoldedDeNovo_contig_164	915
NorthernBobwhite_SimpleDeNovo_contig_244375	NorthernBobwhite_ScaffoldedDeNovo_contig_165	1
NorthernBobwhite_SimpleDeNovo_contig_119004	NorthernBobwhite_ScaffoldedDeNovo_contig_165	2857
NorthernBobwhite_SimpleDeNovo_contig_19819	NorthernBobwhite_ScaffoldedDeNovo_contig_165	55957
NorthernBobwhite_SimpleDeNovo_contig_132454	NorthernBobwhite_ScaffoldedDeNovo_contig_165	74130
NorthernBobwhite_SimpleDeNovo_contig_229597	NorthernBobwhite_ScaffoldedDeNovo_contig_165	87600
NorthernBobwhite_SimpleDeNovo_contig_49517	NorthernBobwhite_ScaffoldedDeNovo_contig_165	90403
NorthernBobwhite_SimpleDeNovo_contig_106729	NorthernBobwhite_ScaffoldedDeNovo_contig_165	101765
NorthernBobwhite_SimpleDeNovo_contig_29231	NorthernBobwhite_ScaffoldedDeNovo_contig_165	119329
NorthernBobwhite_SimpleDeNovo_contig_217567	NorthernBobwhite_ScaffoldedDeNovo_contig_165	126149
NorthernBobwhite_SimpleDeNovo_contig_89067	NorthernBobwhite_ScaffoldedDeNovo_contig_165	127782
NorthernBobwhite_SimpleDeNovo_contig_37140	NorthernBobwhite_ScaffoldedDeNovo_contig_165	157358
NorthernBobwhite_SimpleDeNovo_contig_73064	NorthernBobwhite_ScaffoldedDeNovo_contig_165	162981
NorthernBobwhite_SimpleDeNovo_contig_220341	NorthernBobwhite_ScaffoldedDeNovo_contig_165	164773
NorthernBobwhite_SimpleDeNovo_contig_176973	NorthernBobwhite_ScaffoldedDeNovo_contig_165	185160
NorthernBobwhite_SimpleDeNovo_contig_216771	NorthernBobwhite_ScaffoldedDeNovo_contig_165	188098
NorthernBobwhite_SimpleDeNovo_contig_76557	NorthernBobwhite_ScaffoldedDeNovo_contig_165	188649
NorthernBobwhite_SimpleDeNovo_contig_76558	NorthernBobwhite_ScaffoldedDeNovo_contig_165	192222
NorthernBobwhite_SimpleDeNovo_contig_105799	NorthernBobwhite_ScaffoldedDeNovo_contig_165	209009
NorthernBobwhite_SimpleDeNovo_contig_156196	NorthernBobwhite_ScaffoldedDeNovo_contig_165	214351
NorthernBobwhite_SimpleDeNovo_contig_152032	NorthernBobwhite_ScaffoldedDeNovo_contig_165	217657
NorthernBobwhite_SimpleDeNovo_contig_142829	NorthernBobwhite_ScaffoldedDeNovo_contig_166	1
NorthernBobwhite_SimpleDeNovo_contig_57663	NorthernBobwhite_ScaffoldedDeNovo_contig_166	1412
NorthernBobwhite_SimpleDeNovo_contig_32209	NorthernBobwhite_ScaffoldedDeNovo_contig_166	7731
NorthernBobwhite_SimpleDeNovo_contig_207260	NorthernBobwhite_ScaffoldedDeNovo_contig_166	24215
NorthernBobwhite_SimpleDeNovo_contig_180415	NorthernBobwhite_ScaffoldedDeNovo_contig_166	27831
NorthernBobwhite_SimpleDeNovo_contig_228411	NorthernBobwhite_ScaffoldedDeNovo_contig_166	31798
NorthernBobwhite_SimpleDeNovo_contig_90531	NorthernBobwhite_ScaffoldedDeNovo_contig_166	47151
NorthernBobwhite_SimpleDeNovo_contig_75752	NorthernBobwhite_ScaffoldedDeNovo_contig_166	50797
NorthernBobwhite_SimpleDeNovo_contig_148021	NorthernBobwhite_ScaffoldedDeNovo_contig_166	57054
NorthernBobwhite_SimpleDeNovo_contig_450	NorthernBobwhite_ScaffoldedDeNovo_contig_166	62721
NorthernBobwhite_SimpleDeNovo_contig_251	NorthernBobwhite_ScaffoldedDeNovo_contig_166	70330
NorthernBobwhite_SimpleDeNovo_contig_190495	NorthernBobwhite_ScaffoldedDeNovo_contig_166	72772
NorthernBobwhite_SimpleDeNovo_contig_182992	NorthernBobwhite_ScaffoldedDeNovo_contig_166	76928
NorthernBobwhite_SimpleDeNovo_contig_33328	NorthernBobwhite_ScaffoldedDeNovo_contig_166	79210
NorthernBobwhite_SimpleDeNovo_contig_27952	NorthernBobwhite_ScaffoldedDeNovo_contig_166	82501
NorthernBobwhite_SimpleDeNovo_contig_138248	NorthernBobwhite_ScaffoldedDeNovo_contig_166	86116
NorthernBobwhite_SimpleDeNovo_contig_84878	NorthernBobwhite_ScaffoldedDeNovo_contig_166	87883
NorthernBobwhite_SimpleDeNovo_contig_122879	NorthernBobwhite_ScaffoldedDeNovo_contig_167	1
NorthernBobwhite_SimpleDeNovo_contig_4151	NorthernBobwhite_ScaffoldedDeNovo_contig_167	16870
NorthernBobwhite_SimpleDeNovo_contig_109094	NorthernBobwhite_ScaffoldedDeNovo_contig_167	21777
NorthernBobwhite_SimpleDeNovo_contig_77558	NorthernBobwhite_ScaffoldedDeNovo_contig_167	24849
NorthernBobwhite_SimpleDeNovo_contig_73818	NorthernBobwhite_ScaffoldedDeNovo_contig_167	28698
NorthernBobwhite_SimpleDeNovo_contig_29926	NorthernBobwhite_ScaffoldedDeNovo_contig_167	34061
NorthernBobwhite_SimpleDeNovo_contig_123280	NorthernBobwhite_ScaffoldedDeNovo_contig_167	51043
NorthernBobwhite_SimpleDeNovo_contig_156728	NorthernBobwhite_ScaffoldedDeNovo_contig_167	57225
NorthernBobwhite_SimpleDeNovo_contig_99469	NorthernBobwhite_ScaffoldedDeNovo_contig_167	59608
NorthernBobwhite_SimpleDeNovo_contig_241044	NorthernBobwhite_ScaffoldedDeNovo_contig_167	65995
NorthernBobwhite_SimpleDeNovo_contig_186971	NorthernBobwhite_ScaffoldedDeNovo_contig_167	82049
NorthernBobwhite_SimpleDeNovo_contig_175697	NorthernBobwhite_ScaffoldedDeNovo_contig_167	86516
NorthernBobwhite_SimpleDeNovo_contig_45296	NorthernBobwhite_ScaffoldedDeNovo_contig_167	90443
NorthernBobwhite_SimpleDeNovo_contig_14119	NorthernBobwhite_ScaffoldedDeNovo_contig_167	107651
NorthernBobwhite_SimpleDeNovo_contig_59678	NorthernBobwhite_ScaffoldedDeNovo_contig_167	121855
NorthernBobwhite_SimpleDeNovo_contig_125894	NorthernBobwhite_ScaffoldedDeNovo_contig_167	124984
NorthernBobwhite_SimpleDeNovo_contig_255633	NorthernBobwhite_ScaffoldedDeNovo_contig_167	127646
NorthernBobwhite_SimpleDeNovo_contig_53560	NorthernBobwhite_ScaffoldedDeNovo_contig_167	129174
NorthernBobwhite_SimpleDeNovo_contig_58908	NorthernBobwhite_ScaffoldedDeNovo_contig_167	146171
NorthernBobwhite_SimpleDeNovo_contig_111418	NorthernBobwhite_ScaffoldedDeNovo_contig_168	1
NorthernBobwhite_SimpleDeNovo_contig_210500	NorthernBobwhite_ScaffoldedDeNovo_contig_168	6576
NorthernBobwhite_SimpleDeNovo_contig_138894	NorthernBobwhite_ScaffoldedDeNovo_contig_168	9568
NorthernBobwhite_SimpleDeNovo_contig_138893	NorthernBobwhite_ScaffoldedDeNovo_contig_168	16194
NorthernBobwhite_SimpleDeNovo_contig_269569	NorthernBobwhite_ScaffoldedDeNovo_contig_168	38703
NorthernBobwhite_SimpleDeNovo_contig_124801	NorthernBobwhite_ScaffoldedDeNovo_contig_168	41148
NorthernBobwhite_SimpleDeNovo_contig_68987	NorthernBobwhite_ScaffoldedDeNovo_contig_168	45702
NorthernBobwhite_SimpleDeNovo_contig_68988	NorthernBobwhite_ScaffoldedDeNovo_contig_168	48131
NorthernBobwhite_SimpleDeNovo_contig_50774	NorthernBobwhite_ScaffoldedDeNovo_contig_168	51156
NorthernBobwhite_SimpleDeNovo_contig_90154	NorthernBobwhite_ScaffoldedDeNovo_contig_168	53506
NorthernBobwhite_SimpleDeNovo_contig_90153	NorthernBobwhite_ScaffoldedDeNovo_contig_168	57540
NorthernBobwhite_SimpleDeNovo_contig_229667	NorthernBobwhite_ScaffoldedDeNovo_contig_168	60721
NorthernBobwhite_SimpleDeNovo_contig_249738	NorthernBobwhite_ScaffoldedDeNovo_contig_168	62959
NorthernBobwhite_SimpleDeNovo_contig_157422	NorthernBobwhite_ScaffoldedDeNovo_contig_168	65081
NorthernBobwhite_SimpleDeNovo_contig_114199	NorthernBobwhite_ScaffoldedDeNovo_contig_168	72264
NorthernBobwhite_SimpleDeNovo_contig_237	NorthernBobwhite_ScaffoldedDeNovo_contig_168	75867
NorthernBobwhite_SimpleDeNovo_contig_328188	NorthernBobwhite_ScaffoldedDeNovo_contig_168	78898
NorthernBobwhite_SimpleDeNovo_contig_170909	NorthernBobwhite_ScaffoldedDeNovo_contig_168	83312
NorthernBobwhite_SimpleDeNovo_contig_227814	NorthernBobwhite_ScaffoldedDeNovo_contig_168	84969
NorthernBobwhite_SimpleDeNovo_contig_284934	NorthernBobwhite_ScaffoldedDeNovo_contig_169	1
NorthernBobwhite_SimpleDeNovo_contig_18249	NorthernBobwhite_ScaffoldedDeNovo_contig_169	1539
NorthernBobwhite_SimpleDeNovo_contig_163207	NorthernBobwhite_ScaffoldedDeNovo_contig_169	5140
NorthernBobwhite_SimpleDeNovo_contig_18250	NorthernBobwhite_ScaffoldedDeNovo_contig_169	6842
NorthernBobwhite_SimpleDeNovo_contig_239	NorthernBobwhite_ScaffoldedDeNovo_contig_169	10700
NorthernBobwhite_SimpleDeNovo_contig_238	NorthernBobwhite_ScaffoldedDeNovo_contig_169	19685
NorthernBobwhite_SimpleDeNovo_contig_202647	NorthernBobwhite_ScaffoldedDeNovo_contig_170	14490
NorthernBobwhite_SimpleDeNovo_contig_240	NorthernBobwhite_ScaffoldedDeNovo_contig_170	16911
NorthernBobwhite_SimpleDeNovo_contig_138026	NorthernBobwhite_ScaffoldedDeNovo_contig_170	20735
NorthernBobwhite_SimpleDeNovo_contig_44968	NorthernBobwhite_ScaffoldedDeNovo_contig_170	22833
NorthernBobwhite_SimpleDeNovo_contig_4234	NorthernBobwhite_ScaffoldedDeNovo_contig_170	26739
NorthernBobwhite_SimpleDeNovo_contig_4235	NorthernBobwhite_ScaffoldedDeNovo_contig_170	28494
NorthernBobwhite_SimpleDeNovo_contig_181412	NorthernBobwhite_ScaffoldedDeNovo_contig_170	36873
NorthernBobwhite_SimpleDeNovo_contig_187583	NorthernBobwhite_ScaffoldedDeNovo_contig_170	44934
NorthernBobwhite_SimpleDeNovo_contig_104094	NorthernBobwhite_ScaffoldedDeNovo_contig_170	48605
NorthernBobwhite_SimpleDeNovo_contig_153105	NorthernBobwhite_ScaffoldedDeNovo_contig_170	51131
NorthernBobwhite_SimpleDeNovo_contig_35726	NorthernBobwhite_ScaffoldedDeNovo_contig_173	1
NorthernBobwhite_SimpleDeNovo_contig_104487	NorthernBobwhite_ScaffoldedDeNovo_contig_173	5972
NorthernBobwhite_SimpleDeNovo_contig_166308	NorthernBobwhite_ScaffoldedDeNovo_contig_173	20706
NorthernBobwhite_SimpleDeNovo_contig_104448	NorthernBobwhite_ScaffoldedDeNovo_contig_173	26331
NorthernBobwhite_SimpleDeNovo_contig_104545	NorthernBobwhite_ScaffoldedDeNovo_contig_173	29164
NorthernBobwhite_SimpleDeNovo_contig_22200	NorthernBobwhite_ScaffoldedDeNovo_contig_173	36438
NorthernBobwhite_SimpleDeNovo_contig_210200	NorthernBobwhite_ScaffoldedDeNovo_contig_173	44164
NorthernBobwhite_SimpleDeNovo_contig_243	NorthernBobwhite_ScaffoldedDeNovo_contig_173	46155
NorthernBobwhite_SimpleDeNovo_contig_136879	NorthernBobwhite_ScaffoldedDeNovo_contig_173	53889
NorthernBobwhite_SimpleDeNovo_contig_132299	NorthernBobwhite_ScaffoldedDeNovo_contig_173	56477
NorthernBobwhite_SimpleDeNovo_contig_56537	NorthernBobwhite_ScaffoldedDeNovo_contig_173	69121
NorthernBobwhite_SimpleDeNovo_contig_43047	NorthernBobwhite_ScaffoldedDeNovo_contig_173	72288
NorthernBobwhite_SimpleDeNovo_contig_191694	NorthernBobwhite_ScaffoldedDeNovo_contig_174	1
NorthernBobwhite_SimpleDeNovo_contig_244	NorthernBobwhite_ScaffoldedDeNovo_contig_174	1118
NorthernBobwhite_SimpleDeNovo_contig_41008	NorthernBobwhite_ScaffoldedDeNovo_contig_174	6640
NorthernBobwhite_SimpleDeNovo_contig_42299	NorthernBobwhite_ScaffoldedDeNovo_contig_174	8221
NorthernBobwhite_SimpleDeNovo_contig_45683	NorthernBobwhite_ScaffoldedDeNovo_contig_174	12360
NorthernBobwhite_SimpleDeNovo_contig_130426	NorthernBobwhite_ScaffoldedDeNovo_contig_174	12693
NorthernBobwhite_SimpleDeNovo_contig_286201	NorthernBobwhite_ScaffoldedDeNovo_contig_174	12693
NorthernBobwhite_SimpleDeNovo_contig_42300	NorthernBobwhite_ScaffoldedDeNovo_contig_174	13024
NorthernBobwhite_SimpleDeNovo_contig_49350	NorthernBobwhite_ScaffoldedDeNovo_contig_175	1
NorthernBobwhite_SimpleDeNovo_contig_36353	NorthernBobwhite_ScaffoldedDeNovo_contig_175	17852
NorthernBobwhite_SimpleDeNovo_contig_36354	NorthernBobwhite_ScaffoldedDeNovo_contig_175	22390
NorthernBobwhite_SimpleDeNovo_contig_69230	NorthernBobwhite_ScaffoldedDeNovo_contig_175	51780
NorthernBobwhite_SimpleDeNovo_contig_265416	NorthernBobwhite_ScaffoldedDeNovo_contig_175	56345
NorthernBobwhite_SimpleDeNovo_contig_223453	NorthernBobwhite_ScaffoldedDeNovo_contig_175	79282
NorthernBobwhite_SimpleDeNovo_contig_29346	NorthernBobwhite_ScaffoldedDeNovo_contig_175	91593
NorthernBobwhite_SimpleDeNovo_contig_66345	NorthernBobwhite_ScaffoldedDeNovo_contig_175	99119
NorthernBobwhite_SimpleDeNovo_contig_74359	NorthernBobwhite_ScaffoldedDeNovo_contig_175	104417
NorthernBobwhite_SimpleDeNovo_contig_74358	NorthernBobwhite_ScaffoldedDeNovo_contig_175	109371
NorthernBobwhite_SimpleDeNovo_contig_123531	NorthernBobwhite_ScaffoldedDeNovo_contig_175	112604
NorthernBobwhite_SimpleDeNovo_contig_123211	NorthernBobwhite_ScaffoldedDeNovo_contig_175	126299
NorthernBobwhite_SimpleDeNovo_contig_226	NorthernBobwhite_ScaffoldedDeNovo_contig_175	133487
NorthernBobwhite_SimpleDeNovo_contig_93933	NorthernBobwhite_ScaffoldedDeNovo_contig_175	149612
NorthernBobwhite_SimpleDeNovo_contig_261934	NorthernBobwhite_ScaffoldedDeNovo_contig_175	156508
NorthernBobwhite_SimpleDeNovo_contig_210341	NorthernBobwhite_ScaffoldedDeNovo_contig_175	162418
NorthernBobwhite_SimpleDeNovo_contig_286328	NorthernBobwhite_ScaffoldedDeNovo_contig_176	1
NorthernBobwhite_SimpleDeNovo_contig_87538	NorthernBobwhite_ScaffoldedDeNovo_contig_176	2407
NorthernBobwhite_SimpleDeNovo_contig_196465	NorthernBobwhite_ScaffoldedDeNovo_contig_176	5225
NorthernBobwhite_SimpleDeNovo_contig_36866	NorthernBobwhite_ScaffoldedDeNovo_contig_176	6054
NorthernBobwhite_SimpleDeNovo_contig_227	NorthernBobwhite_ScaffoldedDeNovo_contig_176	14793
NorthernBobwhite_SimpleDeNovo_contig_79674	NorthernBobwhite_ScaffoldedDeNovo_contig_176	19713
NorthernBobwhite_SimpleDeNovo_contig_113575	NorthernBobwhite_ScaffoldedDeNovo_contig_176	22914
NorthernBobwhite_SimpleDeNovo_contig_113576	NorthernBobwhite_ScaffoldedDeNovo_contig_176	25556
NorthernBobwhite_SimpleDeNovo_contig_88724	NorthernBobwhite_ScaffoldedDeNovo_contig_176	28365
NorthernBobwhite_SimpleDeNovo_contig_99580	NorthernBobwhite_ScaffoldedDeNovo_contig_176	33995
NorthernBobwhite_SimpleDeNovo_contig_228	NorthernBobwhite_ScaffoldedDeNovo_contig_177	1
NorthernBobwhite_SimpleDeNovo_contig_125685	NorthernBobwhite_ScaffoldedDeNovo_contig_178	22592
NorthernBobwhite_SimpleDeNovo_contig_61117	NorthernBobwhite_ScaffoldedDeNovo_contig_178	40421
NorthernBobwhite_SimpleDeNovo_contig_119336	NorthernBobwhite_ScaffoldedDeNovo_contig_178	57301
NorthernBobwhite_SimpleDeNovo_contig_230	NorthernBobwhite_ScaffoldedDeNovo_contig_179	1
NorthernBobwhite_SimpleDeNovo_contig_66759	NorthernBobwhite_ScaffoldedDeNovo_contig_179	6113
NorthernBobwhite_SimpleDeNovo_contig_242813	NorthernBobwhite_ScaffoldedDeNovo_contig_179	11316
NorthernBobwhite_SimpleDeNovo_contig_179161	NorthernBobwhite_ScaffoldedDeNovo_contig_179	12461
NorthernBobwhite_SimpleDeNovo_contig_35173	NorthernBobwhite_ScaffoldedDeNovo_contig_179	15964
NorthernBobwhite_SimpleDeNovo_contig_62159	NorthernBobwhite_ScaffoldedDeNovo_contig_179	21358
NorthernBobwhite_SimpleDeNovo_contig_161679	NorthernBobwhite_ScaffoldedDeNovo_contig_179	39257
NorthernBobwhite_SimpleDeNovo_contig_127210	NorthernBobwhite_ScaffoldedDeNovo_contig_179	41255
NorthernBobwhite_SimpleDeNovo_contig_134157	NorthernBobwhite_ScaffoldedDeNovo_contig_179	44326
NorthernBobwhite_SimpleDeNovo_contig_187814	NorthernBobwhite_ScaffoldedDeNovo_contig_179	46889
NorthernBobwhite_SimpleDeNovo_contig_7832	NorthernBobwhite_ScaffoldedDeNovo_contig_180	1145
NorthernBobwhite_SimpleDeNovo_contig_62286	NorthernBobwhite_ScaffoldedDeNovo_contig_180	1640
NorthernBobwhite_SimpleDeNovo_contig_240628	NorthernBobwhite_ScaffoldedDeNovo_contig_181	1
NorthernBobwhite_SimpleDeNovo_contig_135493	NorthernBobwhite_ScaffoldedDeNovo_contig_181	4881
NorthernBobwhite_SimpleDeNovo_contig_41778	NorthernBobwhite_ScaffoldedDeNovo_contig_181	6626
NorthernBobwhite_SimpleDeNovo_contig_78109	NorthernBobwhite_ScaffoldedDeNovo_contig_181	8539
NorthernBobwhite_SimpleDeNovo_contig_35207	NorthernBobwhite_ScaffoldedDeNovo_contig_181	16087
NorthernBobwhite_SimpleDeNovo_contig_169150	NorthernBobwhite_ScaffoldedDeNovo_contig_181	32150
NorthernBobwhite_SimpleDeNovo_contig_266679	NorthernBobwhite_ScaffoldedDeNovo_contig_181	35348
NorthernBobwhite_SimpleDeNovo_contig_53714	NorthernBobwhite_ScaffoldedDeNovo_contig_181	48758
NorthernBobwhite_SimpleDeNovo_contig_177422	NorthernBobwhite_ScaffoldedDeNovo_contig_181	51466
NorthernBobwhite_SimpleDeNovo_contig_298447	NorthernBobwhite_ScaffoldedDeNovo_contig_181	53452
NorthernBobwhite_SimpleDeNovo_contig_210196	NorthernBobwhite_ScaffoldedDeNovo_contig_181	54143
NorthernBobwhite_SimpleDeNovo_contig_356135	NorthernBobwhite_ScaffoldedDeNovo_contig_181	59191
NorthernBobwhite_SimpleDeNovo_contig_372781	NorthernBobwhite_ScaffoldedDeNovo_contig_181	59191
NorthernBobwhite_SimpleDeNovo_contig_82242	NorthernBobwhite_ScaffoldedDeNovo_contig_181	59474
NorthernBobwhite_SimpleDeNovo_contig_203419	NorthernBobwhite_ScaffoldedDeNovo_contig_181	63676
NorthernBobwhite_SimpleDeNovo_contig_161601	NorthernBobwhite_ScaffoldedDeNovo_contig_181	80705
NorthernBobwhite_SimpleDeNovo_contig_107799	NorthernBobwhite_ScaffoldedDeNovo_contig_181	83197
NorthernBobwhite_SimpleDeNovo_contig_113150	NorthernBobwhite_ScaffoldedDeNovo_contig_181	90788
NorthernBobwhite_SimpleDeNovo_contig_26782	NorthernBobwhite_ScaffoldedDeNovo_contig_181	93742
NorthernBobwhite_SimpleDeNovo_contig_35314	NorthernBobwhite_ScaffoldedDeNovo_contig_181	108516
NorthernBobwhite_SimpleDeNovo_contig_56040	NorthernBobwhite_ScaffoldedDeNovo_contig_181	112245
NorthernBobwhite_SimpleDeNovo_contig_291526	NorthernBobwhite_ScaffoldedDeNovo_contig_181	114704
NorthernBobwhite_SimpleDeNovo_contig_232	NorthernBobwhite_ScaffoldedDeNovo_contig_182	1
NorthernBobwhite_SimpleDeNovo_contig_233	NorthernBobwhite_ScaffoldedDeNovo_contig_183	1
NorthernBobwhite_SimpleDeNovo_contig_235	NorthernBobwhite_ScaffoldedDeNovo_contig_184	1
NorthernBobwhite_SimpleDeNovo_contig_262100	NorthernBobwhite_ScaffoldedDeNovo_contig_185	1
NorthernBobwhite_SimpleDeNovo_contig_174946	NorthernBobwhite_ScaffoldedDeNovo_contig_185	1662
NorthernBobwhite_SimpleDeNovo_contig_170	NorthernBobwhite_ScaffoldedDeNovo_contig_185	28711
NorthernBobwhite_SimpleDeNovo_contig_86991	NorthernBobwhite_ScaffoldedDeNovo_contig_185	55831
NorthernBobwhite_SimpleDeNovo_contig_103462	NorthernBobwhite_ScaffoldedDeNovo_contig_185	58622
NorthernBobwhite_SimpleDeNovo_contig_165753	NorthernBobwhite_ScaffoldedDeNovo_contig_185	60448
NorthernBobwhite_SimpleDeNovo_contig_171	NorthernBobwhite_ScaffoldedDeNovo_contig_186	5070
NorthernBobwhite_SimpleDeNovo_contig_39261	NorthernBobwhite_ScaffoldedDeNovo_contig_187	1
NorthernBobwhite_SimpleDeNovo_contig_32764	NorthernBobwhite_ScaffoldedDeNovo_contig_187	1940
NorthernBobwhite_SimpleDeNovo_contig_139647	NorthernBobwhite_ScaffoldedDeNovo_contig_187	16543
NorthernBobwhite_SimpleDeNovo_contig_20526	NorthernBobwhite_ScaffoldedDeNovo_contig_187	22921
NorthernBobwhite_SimpleDeNovo_contig_44086	NorthernBobwhite_ScaffoldedDeNovo_contig_187	44342
NorthernBobwhite_SimpleDeNovo_contig_150359	NorthernBobwhite_ScaffoldedDeNovo_contig_187	50773
NorthernBobwhite_SimpleDeNovo_contig_217646	NorthernBobwhite_ScaffoldedDeNovo_contig_187	52395
NorthernBobwhite_SimpleDeNovo_contig_103713	NorthernBobwhite_ScaffoldedDeNovo_contig_187	77094
NorthernBobwhite_SimpleDeNovo_contig_287839	NorthernBobwhite_ScaffoldedDeNovo_contig_187	82045
NorthernBobwhite_SimpleDeNovo_contig_276	NorthernBobwhite_ScaffoldedDeNovo_contig_188	1
NorthernBobwhite_SimpleDeNovo_contig_3432	NorthernBobwhite_ScaffoldedDeNovo_contig_189	20803
NorthernBobwhite_SimpleDeNovo_contig_230760	NorthernBobwhite_ScaffoldedDeNovo_contig_190	35360
NorthernBobwhite_SimpleDeNovo_contig_116059	NorthernBobwhite_ScaffoldedDeNovo_contig_190	37386
NorthernBobwhite_SimpleDeNovo_contig_61215	NorthernBobwhite_ScaffoldedDeNovo_contig_190	43401
NorthernBobwhite_SimpleDeNovo_contig_142730	NorthernBobwhite_ScaffoldedDeNovo_contig_190	49706
NorthernBobwhite_SimpleDeNovo_contig_16354	NorthernBobwhite_ScaffoldedDeNovo_contig_190	71470
NorthernBobwhite_SimpleDeNovo_contig_5443	NorthernBobwhite_ScaffoldedDeNovo_contig_190	74942
NorthernBobwhite_SimpleDeNovo_contig_5178	NorthernBobwhite_ScaffoldedDeNovo_contig_190	79653
NorthernBobwhite_SimpleDeNovo_contig_109260	NorthernBobwhite_ScaffoldedDeNovo_contig_190	87659
NorthernBobwhite_SimpleDeNovo_contig_137926	NorthernBobwhite_ScaffoldedDeNovo_contig_190	101143
NorthernBobwhite_SimpleDeNovo_contig_278807	NorthernBobwhite_ScaffoldedDeNovo_contig_190	120794
NorthernBobwhite_SimpleDeNovo_contig_132335	NorthernBobwhite_ScaffoldedDeNovo_contig_190	122283
NorthernBobwhite_SimpleDeNovo_contig_84399	NorthernBobwhite_ScaffoldedDeNovo_contig_190	126845
NorthernBobwhite_SimpleDeNovo_contig_11904	NorthernBobwhite_ScaffoldedDeNovo_contig_190	131916
NorthernBobwhite_SimpleDeNovo_contig_173044	NorthernBobwhite_ScaffoldedDeNovo_contig_190	135419
NorthernBobwhite_SimpleDeNovo_contig_143139	NorthernBobwhite_ScaffoldedDeNovo_contig_190	137193
NorthernBobwhite_SimpleDeNovo_contig_75122	NorthernBobwhite_ScaffoldedDeNovo_contig_190	141924
NorthernBobwhite_SimpleDeNovo_contig_5786	NorthernBobwhite_ScaffoldedDeNovo_contig_190	163199
NorthernBobwhite_SimpleDeNovo_contig_120014	NorthernBobwhite_ScaffoldedDeNovo_contig_190	174226
NorthernBobwhite_SimpleDeNovo_contig_204163	NorthernBobwhite_ScaffoldedDeNovo_contig_190	175897
NorthernBobwhite_SimpleDeNovo_contig_59122	NorthernBobwhite_ScaffoldedDeNovo_contig_190	178197
NorthernBobwhite_SimpleDeNovo_contig_12580	NorthernBobwhite_ScaffoldedDeNovo_contig_190	182631
NorthernBobwhite_SimpleDeNovo_contig_134294	NorthernBobwhite_ScaffoldedDeNovo_contig_190	186665
NorthernBobwhite_SimpleDeNovo_contig_215774	NorthernBobwhite_ScaffoldedDeNovo_contig_190	223484
NorthernBobwhite_SimpleDeNovo_contig_244514	NorthernBobwhite_ScaffoldedDeNovo_contig_190	225535
NorthernBobwhite_SimpleDeNovo_contig_42971	NorthernBobwhite_ScaffoldedDeNovo_contig_190	229526
NorthernBobwhite_SimpleDeNovo_contig_164878	NorthernBobwhite_ScaffoldedDeNovo_contig_191	1
NorthernBobwhite_SimpleDeNovo_contig_197809	NorthernBobwhite_ScaffoldedDeNovo_contig_191	6367
NorthernBobwhite_SimpleDeNovo_contig_15783	NorthernBobwhite_ScaffoldedDeNovo_contig_191	8384
NorthernBobwhite_SimpleDeNovo_contig_62091	NorthernBobwhite_ScaffoldedDeNovo_contig_191	11105
NorthernBobwhite_SimpleDeNovo_contig_15782	NorthernBobwhite_ScaffoldedDeNovo_contig_191	12967
NorthernBobwhite_SimpleDeNovo_contig_153537	NorthernBobwhite_ScaffoldedDeNovo_contig_191	18711
NorthernBobwhite_SimpleDeNovo_contig_70186	NorthernBobwhite_ScaffoldedDeNovo_contig_191	21791
NorthernBobwhite_SimpleDeNovo_contig_138363	NorthernBobwhite_ScaffoldedDeNovo_contig_191	24835
NorthernBobwhite_SimpleDeNovo_contig_120	NorthernBobwhite_ScaffoldedDeNovo_contig_191	35412
NorthernBobwhite_SimpleDeNovo_contig_20909	NorthernBobwhite_ScaffoldedDeNovo_contig_191	43094
NorthernBobwhite_SimpleDeNovo_contig_117264	NorthernBobwhite_ScaffoldedDeNovo_contig_192	671
NorthernBobwhite_SimpleDeNovo_contig_109469	NorthernBobwhite_ScaffoldedDeNovo_contig_192	3728
NorthernBobwhite_SimpleDeNovo_contig_256681	NorthernBobwhite_ScaffoldedDeNovo_contig_192	6688
NorthernBobwhite_SimpleDeNovo_contig_131403	NorthernBobwhite_ScaffoldedDeNovo_contig_192	16644
NorthernBobwhite_SimpleDeNovo_contig_238904	NorthernBobwhite_ScaffoldedDeNovo_contig_192	24695
NorthernBobwhite_SimpleDeNovo_contig_122	NorthernBobwhite_ScaffoldedDeNovo_contig_192	26646
NorthernBobwhite_SimpleDeNovo_contig_121	NorthernBobwhite_ScaffoldedDeNovo_contig_192	30938
NorthernBobwhite_SimpleDeNovo_contig_216971	NorthernBobwhite_ScaffoldedDeNovo_contig_192	46639
NorthernBobwhite_SimpleDeNovo_contig_355969	NorthernBobwhite_ScaffoldedDeNovo_contig_193	1
NorthernBobwhite_SimpleDeNovo_contig_129770	NorthernBobwhite_ScaffoldedDeNovo_contig_194	1
NorthernBobwhite_SimpleDeNovo_contig_129771	NorthernBobwhite_ScaffoldedDeNovo_contig_194	1553
NorthernBobwhite_SimpleDeNovo_contig_212789	NorthernBobwhite_ScaffoldedDeNovo_contig_194	5176
NorthernBobwhite_SimpleDeNovo_contig_67775	NorthernBobwhite_ScaffoldedDeNovo_contig_194	8277
NorthernBobwhite_SimpleDeNovo_contig_36244	NorthernBobwhite_ScaffoldedDeNovo_contig_194	14863
NorthernBobwhite_SimpleDeNovo_contig_40056	NorthernBobwhite_ScaffoldedDeNovo_contig_194	18059
NorthernBobwhite_SimpleDeNovo_contig_266632	NorthernBobwhite_ScaffoldedDeNovo_contig_194	22177
NorthernBobwhite_SimpleDeNovo_contig_282390	NorthernBobwhite_ScaffoldedDeNovo_contig_194	24369
NorthernBobwhite_SimpleDeNovo_contig_190543	NorthernBobwhite_ScaffoldedDeNovo_contig_194	28544
NorthernBobwhite_SimpleDeNovo_contig_216714	NorthernBobwhite_ScaffoldedDeNovo_contig_194	36255
NorthernBobwhite_SimpleDeNovo_contig_87609	NorthernBobwhite_ScaffoldedDeNovo_contig_194	51242
NorthernBobwhite_SimpleDeNovo_contig_117719	NorthernBobwhite_ScaffoldedDeNovo_contig_194	58343
NorthernBobwhite_SimpleDeNovo_contig_117718	NorthernBobwhite_ScaffoldedDeNovo_contig_194	66683
NorthernBobwhite_SimpleDeNovo_contig_258043	NorthernBobwhite_ScaffoldedDeNovo_contig_194	69332
NorthernBobwhite_SimpleDeNovo_contig_144710	NorthernBobwhite_ScaffoldedDeNovo_contig_194	86823
NorthernBobwhite_SimpleDeNovo_contig_200219	NorthernBobwhite_ScaffoldedDeNovo_contig_194	98492
NorthernBobwhite_SimpleDeNovo_contig_82468	NorthernBobwhite_ScaffoldedDeNovo_contig_194	104790
NorthernBobwhite_SimpleDeNovo_contig_82469	NorthernBobwhite_ScaffoldedDeNovo_contig_194	107183
NorthernBobwhite_SimpleDeNovo_contig_211983	NorthernBobwhite_ScaffoldedDeNovo_contig_194	113746
NorthernBobwhite_SimpleDeNovo_contig_294193	NorthernBobwhite_ScaffoldedDeNovo_contig_194	118389
NorthernBobwhite_SimpleDeNovo_contig_213659	NorthernBobwhite_ScaffoldedDeNovo_contig_194	120622
NorthernBobwhite_SimpleDeNovo_contig_60260	NorthernBobwhite_ScaffoldedDeNovo_contig_194	124787
NorthernBobwhite_SimpleDeNovo_contig_200	NorthernBobwhite_ScaffoldedDeNovo_contig_195	1
NorthernBobwhite_SimpleDeNovo_contig_146204	NorthernBobwhite_ScaffoldedDeNovo_contig_196	1
NorthernBobwhite_SimpleDeNovo_contig_111317	NorthernBobwhite_ScaffoldedDeNovo_contig_196	1322
NorthernBobwhite_SimpleDeNovo_contig_191776	NorthernBobwhite_ScaffoldedDeNovo_contig_196	3834
NorthernBobwhite_SimpleDeNovo_contig_20737	NorthernBobwhite_ScaffoldedDeNovo_contig_196	6309
NorthernBobwhite_SimpleDeNovo_contig_294778	NorthernBobwhite_ScaffoldedDeNovo_contig_196	12408
NorthernBobwhite_SimpleDeNovo_contig_167971	NorthernBobwhite_ScaffoldedDeNovo_contig_196	15589
NorthernBobwhite_SimpleDeNovo_contig_182629	NorthernBobwhite_ScaffoldedDeNovo_contig_196	21030
NorthernBobwhite_SimpleDeNovo_contig_36452	NorthernBobwhite_ScaffoldedDeNovo_contig_196	26318
NorthernBobwhite_SimpleDeNovo_contig_142748	NorthernBobwhite_ScaffoldedDeNovo_contig_196	37709
NorthernBobwhite_SimpleDeNovo_contig_188778	NorthernBobwhite_ScaffoldedDeNovo_contig_196	39903
NorthernBobwhite_SimpleDeNovo_contig_182196	NorthernBobwhite_ScaffoldedDeNovo_contig_196	44145
NorthernBobwhite_SimpleDeNovo_contig_5845	NorthernBobwhite_ScaffoldedDeNovo_contig_196	46081
NorthernBobwhite_SimpleDeNovo_contig_265039	NorthernBobwhite_ScaffoldedDeNovo_contig_196	51007
NorthernBobwhite_SimpleDeNovo_contig_38066	NorthernBobwhite_ScaffoldedDeNovo_contig_196	68722
NorthernBobwhite_SimpleDeNovo_contig_89010	NorthernBobwhite_ScaffoldedDeNovo_contig_196	85415
NorthernBobwhite_SimpleDeNovo_contig_211899	NorthernBobwhite_ScaffoldedDeNovo_contig_196	102635
NorthernBobwhite_SimpleDeNovo_contig_35564	NorthernBobwhite_ScaffoldedDeNovo_contig_196	106733
NorthernBobwhite_SimpleDeNovo_contig_87123	NorthernBobwhite_ScaffoldedDeNovo_contig_196	113543
NorthernBobwhite_SimpleDeNovo_contig_213428	NorthernBobwhite_ScaffoldedDeNovo_contig_196	118726
NorthernBobwhite_SimpleDeNovo_contig_247524	NorthernBobwhite_ScaffoldedDeNovo_contig_196	120499
NorthernBobwhite_SimpleDeNovo_contig_193152	NorthernBobwhite_ScaffoldedDeNovo_contig_196	122905
NorthernBobwhite_SimpleDeNovo_contig_178835	NorthernBobwhite_ScaffoldedDeNovo_contig_197	1
NorthernBobwhite_SimpleDeNovo_contig_93	NorthernBobwhite_ScaffoldedDeNovo_contig_197	4222
NorthernBobwhite_SimpleDeNovo_contig_155117	NorthernBobwhite_ScaffoldedDeNovo_contig_197	9496
NorthernBobwhite_SimpleDeNovo_contig_41472	NorthernBobwhite_ScaffoldedDeNovo_contig_197	13744
NorthernBobwhite_SimpleDeNovo_contig_172228	NorthernBobwhite_ScaffoldedDeNovo_contig_197	34148
NorthernBobwhite_SimpleDeNovo_contig_26390	NorthernBobwhite_ScaffoldedDeNovo_contig_197	49425
NorthernBobwhite_SimpleDeNovo_contig_123194	NorthernBobwhite_ScaffoldedDeNovo_contig_198	1
NorthernBobwhite_SimpleDeNovo_contig_12860	NorthernBobwhite_ScaffoldedDeNovo_contig_198	14086
NorthernBobwhite_SimpleDeNovo_contig_104526	NorthernBobwhite_ScaffoldedDeNovo_contig_198	17478
NorthernBobwhite_SimpleDeNovo_contig_127974	NorthernBobwhite_ScaffoldedDeNovo_contig_198	20699
NorthernBobwhite_SimpleDeNovo_contig_9536	NorthernBobwhite_ScaffoldedDeNovo_contig_198	33838
NorthernBobwhite_SimpleDeNovo_contig_25385	NorthernBobwhite_ScaffoldedDeNovo_contig_198	36210
NorthernBobwhite_SimpleDeNovo_contig_25384	NorthernBobwhite_ScaffoldedDeNovo_contig_198	38938
NorthernBobwhite_SimpleDeNovo_contig_156311	NorthernBobwhite_ScaffoldedDeNovo_contig_198	40200
NorthernBobwhite_SimpleDeNovo_contig_124019	NorthernBobwhite_ScaffoldedDeNovo_contig_198	45805
NorthernBobwhite_SimpleDeNovo_contig_54508	NorthernBobwhite_ScaffoldedDeNovo_contig_198	47797
NorthernBobwhite_SimpleDeNovo_contig_36486	NorthernBobwhite_ScaffoldedDeNovo_contig_198	50102
NorthernBobwhite_SimpleDeNovo_contig_70427	NorthernBobwhite_ScaffoldedDeNovo_contig_198	51040
NorthernBobwhite_SimpleDeNovo_contig_102412	NorthernBobwhite_ScaffoldedDeNovo_contig_198	56310
NorthernBobwhite_SimpleDeNovo_contig_80728	NorthernBobwhite_ScaffoldedDeNovo_contig_198	58828
NorthernBobwhite_SimpleDeNovo_contig_40445	NorthernBobwhite_ScaffoldedDeNovo_contig_198	62985
NorthernBobwhite_SimpleDeNovo_contig_40444	NorthernBobwhite_ScaffoldedDeNovo_contig_198	67155
NorthernBobwhite_SimpleDeNovo_contig_34122	NorthernBobwhite_ScaffoldedDeNovo_contig_198	74173
NorthernBobwhite_SimpleDeNovo_contig_9107	NorthernBobwhite_ScaffoldedDeNovo_contig_198	79950
NorthernBobwhite_SimpleDeNovo_contig_79370	NorthernBobwhite_ScaffoldedDeNovo_contig_198	87094
NorthernBobwhite_SimpleDeNovo_contig_125557	NorthernBobwhite_ScaffoldedDeNovo_contig_198	91890
NorthernBobwhite_SimpleDeNovo_contig_127820	NorthernBobwhite_ScaffoldedDeNovo_contig_198	94245
NorthernBobwhite_SimpleDeNovo_contig_184846	NorthernBobwhite_ScaffoldedDeNovo_contig_198	99377
NorthernBobwhite_SimpleDeNovo_contig_121217	NorthernBobwhite_ScaffoldedDeNovo_contig_198	100310
NorthernBobwhite_SimpleDeNovo_contig_16388	NorthernBobwhite_ScaffoldedDeNovo_contig_198	106660
NorthernBobwhite_SimpleDeNovo_contig_141935	NorthernBobwhite_ScaffoldedDeNovo_contig_198	120696
NorthernBobwhite_SimpleDeNovo_contig_294455	NorthernBobwhite_ScaffoldedDeNovo_contig_198	122424
NorthernBobwhite_SimpleDeNovo_contig_196891	NorthernBobwhite_ScaffoldedDeNovo_contig_198	123718
NorthernBobwhite_SimpleDeNovo_contig_184674	NorthernBobwhite_ScaffoldedDeNovo_contig_198	126181
NorthernBobwhite_SimpleDeNovo_contig_39627	NorthernBobwhite_ScaffoldedDeNovo_contig_198	130189
NorthernBobwhite_SimpleDeNovo_contig_181228	NorthernBobwhite_ScaffoldedDeNovo_contig_198	137316
NorthernBobwhite_SimpleDeNovo_contig_197447	NorthernBobwhite_ScaffoldedDeNovo_contig_199	1
NorthernBobwhite_SimpleDeNovo_contig_182049	NorthernBobwhite_ScaffoldedDeNovo_contig_199	2089
NorthernBobwhite_SimpleDeNovo_contig_124365	NorthernBobwhite_ScaffoldedDeNovo_contig_199	4222
NorthernBobwhite_SimpleDeNovo_contig_189945	NorthernBobwhite_ScaffoldedDeNovo_contig_199	6130
NorthernBobwhite_SimpleDeNovo_contig_309985	NorthernBobwhite_ScaffoldedDeNovo_contig_199	8527
NorthernBobwhite_SimpleDeNovo_contig_95	NorthernBobwhite_ScaffoldedDeNovo_contig_199	10381
NorthernBobwhite_SimpleDeNovo_contig_150874	NorthernBobwhite_ScaffoldedDeNovo_contig_199	16583
NorthernBobwhite_SimpleDeNovo_contig_51294	NorthernBobwhite_ScaffoldedDeNovo_contig_199	24696
NorthernBobwhite_SimpleDeNovo_contig_189700	NorthernBobwhite_ScaffoldedDeNovo_contig_199	26346
NorthernBobwhite_SimpleDeNovo_contig_308819	NorthernBobwhite_ScaffoldedDeNovo_contig_200	2188
NorthernBobwhite_SimpleDeNovo_contig_225190	NorthernBobwhite_ScaffoldedDeNovo_contig_200	4523
NorthernBobwhite_SimpleDeNovo_contig_139678	NorthernBobwhite_ScaffoldedDeNovo_contig_200	18152
NorthernBobwhite_SimpleDeNovo_contig_139679	NorthernBobwhite_ScaffoldedDeNovo_contig_200	22123
NorthernBobwhite_SimpleDeNovo_contig_120043	NorthernBobwhite_ScaffoldedDeNovo_contig_200	39698
NorthernBobwhite_SimpleDeNovo_contig_267240	NorthernBobwhite_ScaffoldedDeNovo_contig_200	44200
NorthernBobwhite_SimpleDeNovo_contig_72798	NorthernBobwhite_ScaffoldedDeNovo_contig_201	1
NorthernBobwhite_SimpleDeNovo_contig_231061	NorthernBobwhite_ScaffoldedDeNovo_contig_201	5927
NorthernBobwhite_SimpleDeNovo_contig_255019	NorthernBobwhite_ScaffoldedDeNovo_contig_201	31038
NorthernBobwhite_SimpleDeNovo_contig_329319	NorthernBobwhite_ScaffoldedDeNovo_contig_201	32043
NorthernBobwhite_SimpleDeNovo_contig_255754	NorthernBobwhite_ScaffoldedDeNovo_contig_201	32490
NorthernBobwhite_SimpleDeNovo_contig_255753	NorthernBobwhite_ScaffoldedDeNovo_contig_201	32806
NorthernBobwhite_SimpleDeNovo_contig_306329	NorthernBobwhite_ScaffoldedDeNovo_contig_201	33238
NorthernBobwhite_SimpleDeNovo_contig_336448	NorthernBobwhite_ScaffoldedDeNovo_contig_201	33807
NorthernBobwhite_SimpleDeNovo_contig_298671	NorthernBobwhite_ScaffoldedDeNovo_contig_201	34372
NorthernBobwhite_SimpleDeNovo_contig_330200	NorthernBobwhite_ScaffoldedDeNovo_contig_201	35091
NorthernBobwhite_SimpleDeNovo_contig_177682	NorthernBobwhite_ScaffoldedDeNovo_contig_201	35695
NorthernBobwhite_SimpleDeNovo_contig_247013	NorthernBobwhite_ScaffoldedDeNovo_contig_201	36311
NorthernBobwhite_SimpleDeNovo_contig_236251	NorthernBobwhite_ScaffoldedDeNovo_contig_201	36623
NorthernBobwhite_SimpleDeNovo_contig_98	NorthernBobwhite_ScaffoldedDeNovo_contig_201	37602
NorthernBobwhite_SimpleDeNovo_contig_305298	NorthernBobwhite_ScaffoldedDeNovo_contig_201	38842
NorthernBobwhite_SimpleDeNovo_contig_280847	NorthernBobwhite_ScaffoldedDeNovo_contig_201	39328
NorthernBobwhite_SimpleDeNovo_contig_97	NorthernBobwhite_ScaffoldedDeNovo_contig_201	40311
NorthernBobwhite_SimpleDeNovo_contig_256273	NorthernBobwhite_ScaffoldedDeNovo_contig_201	43769
NorthernBobwhite_SimpleDeNovo_contig_101586	NorthernBobwhite_ScaffoldedDeNovo_contig_201	45209
NorthernBobwhite_SimpleDeNovo_contig_101587	NorthernBobwhite_ScaffoldedDeNovo_contig_201	49154
NorthernBobwhite_SimpleDeNovo_contig_144664	NorthernBobwhite_ScaffoldedDeNovo_contig_201	51784
NorthernBobwhite_SimpleDeNovo_contig_30357	NorthernBobwhite_ScaffoldedDeNovo_contig_201	67078
NorthernBobwhite_SimpleDeNovo_contig_205697	NorthernBobwhite_ScaffoldedDeNovo_contig_201	70564
NorthernBobwhite_SimpleDeNovo_contig_152225	NorthernBobwhite_ScaffoldedDeNovo_contig_201	71555
NorthernBobwhite_SimpleDeNovo_contig_205696	NorthernBobwhite_ScaffoldedDeNovo_contig_201	73176
NorthernBobwhite_SimpleDeNovo_contig_196629	NorthernBobwhite_ScaffoldedDeNovo_contig_201	75877
NorthernBobwhite_SimpleDeNovo_contig_44893	NorthernBobwhite_ScaffoldedDeNovo_contig_201	80723
NorthernBobwhite_SimpleDeNovo_contig_208419	NorthernBobwhite_ScaffoldedDeNovo_contig_201	85825
NorthernBobwhite_SimpleDeNovo_contig_25481	NorthernBobwhite_ScaffoldedDeNovo_contig_201	89352
NorthernBobwhite_SimpleDeNovo_contig_63167	NorthernBobwhite_ScaffoldedDeNovo_contig_202	19990
NorthernBobwhite_SimpleDeNovo_contig_99	NorthernBobwhite_ScaffoldedDeNovo_contig_202	26034
NorthernBobwhite_SimpleDeNovo_contig_132633	NorthernBobwhite_ScaffoldedDeNovo_contig_202	29047
NorthernBobwhite_SimpleDeNovo_contig_163033	NorthernBobwhite_ScaffoldedDeNovo_contig_202	33791
NorthernBobwhite_SimpleDeNovo_contig_216996	NorthernBobwhite_ScaffoldedDeNovo_contig_202	41731
NorthernBobwhite_SimpleDeNovo_contig_329839	NorthernBobwhite_ScaffoldedDeNovo_contig_202	49226
NorthernBobwhite_SimpleDeNovo_contig_215971	NorthernBobwhite_ScaffoldedDeNovo_contig_202	50337
NorthernBobwhite_SimpleDeNovo_contig_166680	NorthernBobwhite_ScaffoldedDeNovo_contig_202	54468
NorthernBobwhite_SimpleDeNovo_contig_32616	NorthernBobwhite_ScaffoldedDeNovo_contig_202	62006
NorthernBobwhite_SimpleDeNovo_contig_26499	NorthernBobwhite_ScaffoldedDeNovo_contig_202	64919
NorthernBobwhite_SimpleDeNovo_contig_210293	NorthernBobwhite_ScaffoldedDeNovo_contig_202	71777
NorthernBobwhite_SimpleDeNovo_contig_125653	NorthernBobwhite_ScaffoldedDeNovo_contig_202	74814
NorthernBobwhite_SimpleDeNovo_contig_118177	NorthernBobwhite_ScaffoldedDeNovo_contig_202	87775
NorthernBobwhite_SimpleDeNovo_contig_61427	NorthernBobwhite_ScaffoldedDeNovo_contig_203	8343
NorthernBobwhite_SimpleDeNovo_contig_100	NorthernBobwhite_ScaffoldedDeNovo_contig_203	11280
NorthernBobwhite_SimpleDeNovo_contig_177746	NorthernBobwhite_ScaffoldedDeNovo_contig_203	13200
NorthernBobwhite_SimpleDeNovo_contig_95120	NorthernBobwhite_ScaffoldedDeNovo_contig_204	1
NorthernBobwhite_SimpleDeNovo_contig_214302	NorthernBobwhite_ScaffoldedDeNovo_contig_204	6287
NorthernBobwhite_SimpleDeNovo_contig_101	NorthernBobwhite_ScaffoldedDeNovo_contig_204	11085
NorthernBobwhite_SimpleDeNovo_contig_155009	NorthernBobwhite_ScaffoldedDeNovo_contig_204	18652
NorthernBobwhite_SimpleDeNovo_contig_104023	NorthernBobwhite_ScaffoldedDeNovo_contig_205	9250
NorthernBobwhite_SimpleDeNovo_contig_14044	NorthernBobwhite_ScaffoldedDeNovo_contig_205	13501
NorthernBobwhite_SimpleDeNovo_contig_9933	NorthernBobwhite_ScaffoldedDeNovo_contig_205	33003
NorthernBobwhite_SimpleDeNovo_contig_40288	NorthernBobwhite_ScaffoldedDeNovo_contig_205	37356
NorthernBobwhite_SimpleDeNovo_contig_39557	NorthernBobwhite_ScaffoldedDeNovo_contig_205	41600
NorthernBobwhite_SimpleDeNovo_contig_14309	NorthernBobwhite_ScaffoldedDeNovo_contig_205	44954
NorthernBobwhite_SimpleDeNovo_contig_13800	NorthernBobwhite_ScaffoldedDeNovo_contig_205	69215
NorthernBobwhite_SimpleDeNovo_contig_29072	NorthernBobwhite_ScaffoldedDeNovo_contig_205	76856
NorthernBobwhite_SimpleDeNovo_contig_221875	NorthernBobwhite_ScaffoldedDeNovo_contig_205	81988
NorthernBobwhite_SimpleDeNovo_contig_97618	NorthernBobwhite_ScaffoldedDeNovo_contig_205	83512
NorthernBobwhite_SimpleDeNovo_contig_35826	NorthernBobwhite_ScaffoldedDeNovo_contig_205	86830
NorthernBobwhite_SimpleDeNovo_contig_177708	NorthernBobwhite_ScaffoldedDeNovo_contig_205	92394
NorthernBobwhite_SimpleDeNovo_contig_159116	NorthernBobwhite_ScaffoldedDeNovo_contig_205	93174
NorthernBobwhite_SimpleDeNovo_contig_157526	NorthernBobwhite_ScaffoldedDeNovo_contig_205	113105
NorthernBobwhite_SimpleDeNovo_contig_93249	NorthernBobwhite_ScaffoldedDeNovo_contig_206	1
NorthernBobwhite_SimpleDeNovo_contig_104	NorthernBobwhite_ScaffoldedDeNovo_contig_206	4090
NorthernBobwhite_SimpleDeNovo_contig_50807	NorthernBobwhite_ScaffoldedDeNovo_contig_206	12676
NorthernBobwhite_SimpleDeNovo_contig_143048	NorthernBobwhite_ScaffoldedDeNovo_contig_207	1
NorthernBobwhite_SimpleDeNovo_contig_197160	NorthernBobwhite_ScaffoldedDeNovo_contig_207	5528
NorthernBobwhite_SimpleDeNovo_contig_58094	NorthernBobwhite_ScaffoldedDeNovo_contig_207	6159
NorthernBobwhite_SimpleDeNovo_contig_323960	NorthernBobwhite_ScaffoldedDeNovo_contig_207	10878
NorthernBobwhite_SimpleDeNovo_contig_114468	NorthernBobwhite_ScaffoldedDeNovo_contig_207	11303
NorthernBobwhite_SimpleDeNovo_contig_84892	NorthernBobwhite_ScaffoldedDeNovo_contig_207	12717
NorthernBobwhite_SimpleDeNovo_contig_120177	NorthernBobwhite_ScaffoldedDeNovo_contig_207	19583
NorthernBobwhite_SimpleDeNovo_contig_155909	NorthernBobwhite_ScaffoldedDeNovo_contig_207	54732
NorthernBobwhite_SimpleDeNovo_contig_59631	NorthernBobwhite_ScaffoldedDeNovo_contig_207	56010
NorthernBobwhite_SimpleDeNovo_contig_319768	NorthernBobwhite_ScaffoldedDeNovo_contig_207	73572
NorthernBobwhite_SimpleDeNovo_contig_195676	NorthernBobwhite_ScaffoldedDeNovo_contig_207	74622
NorthernBobwhite_SimpleDeNovo_contig_51735	NorthernBobwhite_ScaffoldedDeNovo_contig_208	1
NorthernBobwhite_SimpleDeNovo_contig_57231	NorthernBobwhite_ScaffoldedDeNovo_contig_208	1212
NorthernBobwhite_SimpleDeNovo_contig_152525	NorthernBobwhite_ScaffoldedDeNovo_contig_208	5988
NorthernBobwhite_SimpleDeNovo_contig_247262	NorthernBobwhite_ScaffoldedDeNovo_contig_208	10931
NorthernBobwhite_SimpleDeNovo_contig_49603	NorthernBobwhite_ScaffoldedDeNovo_contig_208	14745
NorthernBobwhite_SimpleDeNovo_contig_48888	NorthernBobwhite_ScaffoldedDeNovo_contig_208	19668
NorthernBobwhite_SimpleDeNovo_contig_186	NorthernBobwhite_ScaffoldedDeNovo_contig_208	26100
NorthernBobwhite_SimpleDeNovo_contig_185	NorthernBobwhite_ScaffoldedDeNovo_contig_208	29441
NorthernBobwhite_SimpleDeNovo_contig_40463	NorthernBobwhite_ScaffoldedDeNovo_contig_208	33062
NorthernBobwhite_SimpleDeNovo_contig_199442	NorthernBobwhite_ScaffoldedDeNovo_contig_208	37281
NorthernBobwhite_SimpleDeNovo_contig_21067	NorthernBobwhite_ScaffoldedDeNovo_contig_209	1
NorthernBobwhite_SimpleDeNovo_contig_187	NorthernBobwhite_ScaffoldedDeNovo_contig_209	2827
NorthernBobwhite_SimpleDeNovo_contig_230698	NorthernBobwhite_ScaffoldedDeNovo_contig_209	5408
NorthernBobwhite_SimpleDeNovo_contig_188	NorthernBobwhite_ScaffoldedDeNovo_contig_210	20
NorthernBobwhite_SimpleDeNovo_contig_63945	NorthernBobwhite_ScaffoldedDeNovo_contig_210	5441
NorthernBobwhite_SimpleDeNovo_contig_180039	NorthernBobwhite_ScaffoldedDeNovo_contig_210	11265
NorthernBobwhite_SimpleDeNovo_contig_26626	NorthernBobwhite_ScaffoldedDeNovo_contig_210	18422
NorthernBobwhite_SimpleDeNovo_contig_281767	NorthernBobwhite_ScaffoldedDeNovo_contig_210	23188
NorthernBobwhite_SimpleDeNovo_contig_110962	NorthernBobwhite_ScaffoldedDeNovo_contig_211	1488
NorthernBobwhite_SimpleDeNovo_contig_110963	NorthernBobwhite_ScaffoldedDeNovo_contig_211	4467
NorthernBobwhite_SimpleDeNovo_contig_71011	NorthernBobwhite_ScaffoldedDeNovo_contig_212	1
NorthernBobwhite_SimpleDeNovo_contig_176517	NorthernBobwhite_ScaffoldedDeNovo_contig_212	3591
NorthernBobwhite_SimpleDeNovo_contig_312	NorthernBobwhite_ScaffoldedDeNovo_contig_212	7173
NorthernBobwhite_SimpleDeNovo_contig_24332	NorthernBobwhite_ScaffoldedDeNovo_contig_212	12733
NorthernBobwhite_SimpleDeNovo_contig_220715	NorthernBobwhite_ScaffoldedDeNovo_contig_212	21118
NorthernBobwhite_SimpleDeNovo_contig_234097	NorthernBobwhite_ScaffoldedDeNovo_contig_212	25203
NorthernBobwhite_SimpleDeNovo_contig_92559	NorthernBobwhite_ScaffoldedDeNovo_contig_212	28805
NorthernBobwhite_SimpleDeNovo_contig_127381	NorthernBobwhite_ScaffoldedDeNovo_contig_213	217814
NorthernBobwhite_SimpleDeNovo_contig_163705	NorthernBobwhite_ScaffoldedDeNovo_contig_213	219669
NorthernBobwhite_SimpleDeNovo_contig_152078	NorthernBobwhite_ScaffoldedDeNovo_contig_213	237382
NorthernBobwhite_SimpleDeNovo_contig_208793	NorthernBobwhite_ScaffoldedDeNovo_contig_213	239575
NorthernBobwhite_SimpleDeNovo_contig_131288	NorthernBobwhite_ScaffoldedDeNovo_contig_213	276457
NorthernBobwhite_SimpleDeNovo_contig_80659	NorthernBobwhite_ScaffoldedDeNovo_contig_213	281604
NorthernBobwhite_SimpleDeNovo_contig_155449	NorthernBobwhite_ScaffoldedDeNovo_contig_214	1
NorthernBobwhite_SimpleDeNovo_contig_45785	NorthernBobwhite_ScaffoldedDeNovo_contig_214	6968
NorthernBobwhite_SimpleDeNovo_contig_55380	NorthernBobwhite_ScaffoldedDeNovo_contig_214	25036
NorthernBobwhite_SimpleDeNovo_contig_233439	NorthernBobwhite_ScaffoldedDeNovo_contig_214	29018
NorthernBobwhite_SimpleDeNovo_contig_44	NorthernBobwhite_ScaffoldedDeNovo_contig_215	1
NorthernBobwhite_SimpleDeNovo_contig_208844	NorthernBobwhite_ScaffoldedDeNovo_contig_215	5286
NorthernBobwhite_SimpleDeNovo_contig_108636	NorthernBobwhite_ScaffoldedDeNovo_contig_215	8082
NorthernBobwhite_SimpleDeNovo_contig_17056	NorthernBobwhite_ScaffoldedDeNovo_contig_215	13234
NorthernBobwhite_SimpleDeNovo_contig_166	NorthernBobwhite_ScaffoldedDeNovo_contig_216	1
NorthernBobwhite_SimpleDeNovo_contig_167	NorthernBobwhite_ScaffoldedDeNovo_contig_217	1
NorthernBobwhite_SimpleDeNovo_contig_85216	NorthernBobwhite_ScaffoldedDeNovo_contig_218	1
NorthernBobwhite_SimpleDeNovo_contig_63958	NorthernBobwhite_ScaffoldedDeNovo_contig_218	9529
NorthernBobwhite_SimpleDeNovo_contig_168	NorthernBobwhite_ScaffoldedDeNovo_contig_218	11156
NorthernBobwhite_SimpleDeNovo_contig_134941	NorthernBobwhite_ScaffoldedDeNovo_contig_218	14274
NorthernBobwhite_SimpleDeNovo_contig_28715	NorthernBobwhite_ScaffoldedDeNovo_contig_219	1
NorthernBobwhite_SimpleDeNovo_contig_4015	NorthernBobwhite_ScaffoldedDeNovo_contig_219	6379
NorthernBobwhite_SimpleDeNovo_contig_232097	NorthernBobwhite_ScaffoldedDeNovo_contig_219	10622
NorthernBobwhite_SimpleDeNovo_contig_96305	NorthernBobwhite_ScaffoldedDeNovo_contig_219	13164
NorthernBobwhite_SimpleDeNovo_contig_232999	NorthernBobwhite_ScaffoldedDeNovo_contig_219	19445
NorthernBobwhite_SimpleDeNovo_contig_126437	NorthernBobwhite_ScaffoldedDeNovo_contig_219	22824
NorthernBobwhite_SimpleDeNovo_contig_169	NorthernBobwhite_ScaffoldedDeNovo_contig_219	25462
NorthernBobwhite_SimpleDeNovo_contig_100333	NorthernBobwhite_ScaffoldedDeNovo_contig_219	28019
NorthernBobwhite_SimpleDeNovo_contig_176475	NorthernBobwhite_ScaffoldedDeNovo_contig_219	31226
NorthernBobwhite_SimpleDeNovo_contig_179763	NorthernBobwhite_ScaffoldedDeNovo_contig_219	32372
NorthernBobwhite_SimpleDeNovo_contig_73993	NorthernBobwhite_ScaffoldedDeNovo_contig_219	35958
NorthernBobwhite_SimpleDeNovo_contig_125690	NorthernBobwhite_ScaffoldedDeNovo_contig_219	42242
NorthernBobwhite_SimpleDeNovo_contig_47756	NorthernBobwhite_ScaffoldedDeNovo_contig_219	45252
NorthernBobwhite_SimpleDeNovo_contig_279460	NorthernBobwhite_ScaffoldedDeNovo_contig_220	1
NorthernBobwhite_SimpleDeNovo_contig_75743	NorthernBobwhite_ScaffoldedDeNovo_contig_220	20459
NorthernBobwhite_SimpleDeNovo_contig_197363	NorthernBobwhite_ScaffoldedDeNovo_contig_220	23879
NorthernBobwhite_SimpleDeNovo_contig_171189	NorthernBobwhite_ScaffoldedDeNovo_contig_220	27117
NorthernBobwhite_SimpleDeNovo_contig_181233	NorthernBobwhite_ScaffoldedDeNovo_contig_220	29380
NorthernBobwhite_SimpleDeNovo_contig_159736	NorthernBobwhite_ScaffoldedDeNovo_contig_220	33093
NorthernBobwhite_SimpleDeNovo_contig_30030	NorthernBobwhite_ScaffoldedDeNovo_contig_220	37150
NorthernBobwhite_SimpleDeNovo_contig_23196	NorthernBobwhite_ScaffoldedDeNovo_contig_220	41593
NorthernBobwhite_SimpleDeNovo_contig_23197	NorthernBobwhite_ScaffoldedDeNovo_contig_220	47110
NorthernBobwhite_SimpleDeNovo_contig_39365	NorthernBobwhite_ScaffoldedDeNovo_contig_220	50028
NorthernBobwhite_SimpleDeNovo_contig_17354	NorthernBobwhite_ScaffoldedDeNovo_contig_220	61584
NorthernBobwhite_SimpleDeNovo_contig_147141	NorthernBobwhite_ScaffoldedDeNovo_contig_220	63195
NorthernBobwhite_SimpleDeNovo_contig_183476	NorthernBobwhite_ScaffoldedDeNovo_contig_220	68764
NorthernBobwhite_SimpleDeNovo_contig_183582	NorthernBobwhite_ScaffoldedDeNovo_contig_220	70335
NorthernBobwhite_SimpleDeNovo_contig_199208	NorthernBobwhite_ScaffoldedDeNovo_contig_220	73328
NorthernBobwhite_SimpleDeNovo_contig_118744	NorthernBobwhite_ScaffoldedDeNovo_contig_220	75622
NorthernBobwhite_SimpleDeNovo_contig_118743	NorthernBobwhite_ScaffoldedDeNovo_contig_220	80179
NorthernBobwhite_SimpleDeNovo_contig_134518	NorthernBobwhite_ScaffoldedDeNovo_contig_220	94784
NorthernBobwhite_SimpleDeNovo_contig_117598	NorthernBobwhite_ScaffoldedDeNovo_contig_220	96723
NorthernBobwhite_SimpleDeNovo_contig_63811	NorthernBobwhite_ScaffoldedDeNovo_contig_220	99235
NorthernBobwhite_SimpleDeNovo_contig_196300	NorthernBobwhite_ScaffoldedDeNovo_contig_220	103997
NorthernBobwhite_SimpleDeNovo_contig_19421	NorthernBobwhite_ScaffoldedDeNovo_contig_220	106670
NorthernBobwhite_SimpleDeNovo_contig_250084	NorthernBobwhite_ScaffoldedDeNovo_contig_220	111500
NorthernBobwhite_SimpleDeNovo_contig_64216	NorthernBobwhite_ScaffoldedDeNovo_contig_220	113471
NorthernBobwhite_SimpleDeNovo_contig_104435	NorthernBobwhite_ScaffoldedDeNovo_contig_220	120512
NorthernBobwhite_SimpleDeNovo_contig_148939	NorthernBobwhite_ScaffoldedDeNovo_contig_220	123556
NorthernBobwhite_SimpleDeNovo_contig_25695	NorthernBobwhite_ScaffoldedDeNovo_contig_220	126432
NorthernBobwhite_SimpleDeNovo_contig_12783	NorthernBobwhite_ScaffoldedDeNovo_contig_220	127753
NorthernBobwhite_SimpleDeNovo_contig_121503	NorthernBobwhite_ScaffoldedDeNovo_contig_220	132293
NorthernBobwhite_SimpleDeNovo_contig_165394	NorthernBobwhite_ScaffoldedDeNovo_contig_220	135356
NorthernBobwhite_SimpleDeNovo_contig_119731	NorthernBobwhite_ScaffoldedDeNovo_contig_220	138446
NorthernBobwhite_SimpleDeNovo_contig_119730	NorthernBobwhite_ScaffoldedDeNovo_contig_220	140677
NorthernBobwhite_SimpleDeNovo_contig_217718	NorthernBobwhite_ScaffoldedDeNovo_contig_220	145215
NorthernBobwhite_SimpleDeNovo_contig_40524	NorthernBobwhite_ScaffoldedDeNovo_contig_220	150548
NorthernBobwhite_SimpleDeNovo_contig_40525	NorthernBobwhite_ScaffoldedDeNovo_contig_220	153627
NorthernBobwhite_SimpleDeNovo_contig_198422	NorthernBobwhite_ScaffoldedDeNovo_contig_220	165994
NorthernBobwhite_SimpleDeNovo_contig_153852	NorthernBobwhite_ScaffoldedDeNovo_contig_220	169344
NorthernBobwhite_SimpleDeNovo_contig_168005	NorthernBobwhite_ScaffoldedDeNovo_contig_220	171227
NorthernBobwhite_SimpleDeNovo_contig_215107	NorthernBobwhite_ScaffoldedDeNovo_contig_220	174593
NorthernBobwhite_SimpleDeNovo_contig_305063	NorthernBobwhite_ScaffoldedDeNovo_contig_220	176143
NorthernBobwhite_SimpleDeNovo_contig_129973	NorthernBobwhite_ScaffoldedDeNovo_contig_220	177163
NorthernBobwhite_SimpleDeNovo_contig_345016	NorthernBobwhite_ScaffoldedDeNovo_contig_220	183330
NorthernBobwhite_SimpleDeNovo_contig_129974	NorthernBobwhite_ScaffoldedDeNovo_contig_220	184408
NorthernBobwhite_SimpleDeNovo_contig_79238	NorthernBobwhite_ScaffoldedDeNovo_contig_220	204469
NorthernBobwhite_SimpleDeNovo_contig_69968	NorthernBobwhite_ScaffoldedDeNovo_contig_220	213502
NorthernBobwhite_SimpleDeNovo_contig_55982	NorthernBobwhite_ScaffoldedDeNovo_contig_220	226786
NorthernBobwhite_SimpleDeNovo_contig_76870	NorthernBobwhite_ScaffoldedDeNovo_contig_220	229398
NorthernBobwhite_SimpleDeNovo_contig_39927	NorthernBobwhite_ScaffoldedDeNovo_contig_220	236650
NorthernBobwhite_SimpleDeNovo_contig_132609	NorthernBobwhite_ScaffoldedDeNovo_contig_220	244546
NorthernBobwhite_SimpleDeNovo_contig_279	NorthernBobwhite_ScaffoldedDeNovo_contig_220	248901
NorthernBobwhite_SimpleDeNovo_contig_60681	NorthernBobwhite_ScaffoldedDeNovo_contig_220	255765
NorthernBobwhite_SimpleDeNovo_contig_60680	NorthernBobwhite_ScaffoldedDeNovo_contig_220	260128
NorthernBobwhite_SimpleDeNovo_contig_82225	NorthernBobwhite_ScaffoldedDeNovo_contig_220	265145
NorthernBobwhite_SimpleDeNovo_contig_233895	NorthernBobwhite_ScaffoldedDeNovo_contig_221	13396
NorthernBobwhite_SimpleDeNovo_contig_134944	NorthernBobwhite_ScaffoldedDeNovo_contig_222	1
NorthernBobwhite_SimpleDeNovo_contig_123526	NorthernBobwhite_ScaffoldedDeNovo_contig_222	1999
NorthernBobwhite_SimpleDeNovo_contig_290226	NorthernBobwhite_ScaffoldedDeNovo_contig_222	9806
NorthernBobwhite_SimpleDeNovo_contig_214809	NorthernBobwhite_ScaffoldedDeNovo_contig_222	11165
NorthernBobwhite_SimpleDeNovo_contig_214808	NorthernBobwhite_ScaffoldedDeNovo_contig_222	18700
NorthernBobwhite_SimpleDeNovo_contig_223081	NorthernBobwhite_ScaffoldedDeNovo_contig_222	21793
NorthernBobwhite_SimpleDeNovo_contig_55423	NorthernBobwhite_ScaffoldedDeNovo_contig_222	25563
NorthernBobwhite_SimpleDeNovo_contig_281	NorthernBobwhite_ScaffoldedDeNovo_contig_222	31884
NorthernBobwhite_SimpleDeNovo_contig_31209	NorthernBobwhite_ScaffoldedDeNovo_contig_222	39234
NorthernBobwhite_SimpleDeNovo_contig_77980	NorthernBobwhite_ScaffoldedDeNovo_contig_223	1
NorthernBobwhite_SimpleDeNovo_contig_77979	NorthernBobwhite_ScaffoldedDeNovo_contig_223	2771
NorthernBobwhite_SimpleDeNovo_contig_147651	NorthernBobwhite_ScaffoldedDeNovo_contig_223	24265
NorthernBobwhite_SimpleDeNovo_contig_282	NorthernBobwhite_ScaffoldedDeNovo_contig_223	26119
NorthernBobwhite_SimpleDeNovo_contig_141884	NorthernBobwhite_ScaffoldedDeNovo_contig_223	48505
NorthernBobwhite_SimpleDeNovo_contig_130064	NorthernBobwhite_ScaffoldedDeNovo_contig_223	76816
NorthernBobwhite_SimpleDeNovo_contig_184907	NorthernBobwhite_ScaffoldedDeNovo_contig_223	81927
NorthernBobwhite_SimpleDeNovo_contig_253359	NorthernBobwhite_ScaffoldedDeNovo_contig_223	86185
NorthernBobwhite_SimpleDeNovo_contig_35771	NorthernBobwhite_ScaffoldedDeNovo_contig_223	89460
NorthernBobwhite_SimpleDeNovo_contig_81243	NorthernBobwhite_ScaffoldedDeNovo_contig_223	94020
NorthernBobwhite_SimpleDeNovo_contig_169238	NorthernBobwhite_ScaffoldedDeNovo_contig_223	95720
NorthernBobwhite_SimpleDeNovo_contig_79750	NorthernBobwhite_ScaffoldedDeNovo_contig_223	98526
NorthernBobwhite_SimpleDeNovo_contig_290198	NorthernBobwhite_ScaffoldedDeNovo_contig_224	45006
NorthernBobwhite_SimpleDeNovo_contig_326442	NorthernBobwhite_ScaffoldedDeNovo_contig_224	46956
NorthernBobwhite_SimpleDeNovo_contig_84143	NorthernBobwhite_ScaffoldedDeNovo_contig_224	47389
NorthernBobwhite_SimpleDeNovo_contig_275262	NorthernBobwhite_ScaffoldedDeNovo_contig_224	48091
NorthernBobwhite_SimpleDeNovo_contig_188465	NorthernBobwhite_ScaffoldedDeNovo_contig_224	49260
NorthernBobwhite_SimpleDeNovo_contig_71594	NorthernBobwhite_ScaffoldedDeNovo_contig_224	53624
NorthernBobwhite_SimpleDeNovo_contig_171075	NorthernBobwhite_ScaffoldedDeNovo_contig_224	56619
NorthernBobwhite_SimpleDeNovo_contig_268576	NorthernBobwhite_ScaffoldedDeNovo_contig_224	58461
NorthernBobwhite_SimpleDeNovo_contig_145104	NorthernBobwhite_ScaffoldedDeNovo_contig_224	59834
NorthernBobwhite_SimpleDeNovo_contig_63619	NorthernBobwhite_ScaffoldedDeNovo_contig_224	65864
NorthernBobwhite_SimpleDeNovo_contig_63620	NorthernBobwhite_ScaffoldedDeNovo_contig_224	70983
NorthernBobwhite_SimpleDeNovo_contig_160345	NorthernBobwhite_ScaffoldedDeNovo_contig_224	82884
NorthernBobwhite_SimpleDeNovo_contig_66714	NorthernBobwhite_ScaffoldedDeNovo_contig_224	85366
NorthernBobwhite_SimpleDeNovo_contig_47877	NorthernBobwhite_ScaffoldedDeNovo_contig_224	88358
[truncated: 337,922+ more rows]

## Sheet: Sheet1
Naked de novo Contig ID	Scaffolded Contig ID	Naked de novo Contig Start Position
Quail_Naked_DeNovo_contig_199836	Quail_Scaffolded_DeNovo_contig_24	20360
Quail_Naked_DeNovo_contig_224281	Quail_Scaffolded_DeNovo_contig_36	21668
Quail_Naked_DeNovo_contig_149535	Quail_Scaffolded_DeNovo_contig_45	522900
Quail_Naked_DeNovo_contig_250337	Quail_Scaffolded_DeNovo_contig_115	98600
Quail_Naked_DeNovo_contig_191	Quail_Scaffolded_DeNovo_contig_158	1
Quail_Naked_DeNovo_contig_20035	Quail_Scaffolded_DeNovo_contig_164	594
Quail_Naked_DeNovo_contig_287419	Quail_Scaffolded_DeNovo_contig_198	100372
Quail_Naked_DeNovo_contig_243334	Quail_Scaffolded_DeNovo_contig_227	106352
Quail_Naked_DeNovo_contig_175671	Quail_Scaffolded_DeNovo_contig_232	1
Quail_Naked_DeNovo_contig_110644	Quail_Scaffolded_DeNovo_contig_237	28582
Quail_Naked_DeNovo_contig_167118	Quail_Scaffolded_DeNovo_contig_287	104862
Quail_Naked_DeNovo_contig_237503	Quail_Scaffolded_DeNovo_contig_300	40879
Quail_Naked_DeNovo_contig_31808	Quail_Scaffolded_DeNovo_contig_304	1
Quail_Naked_DeNovo_contig_208149	Quail_Scaffolded_DeNovo_contig_330	47777
Quail_Naked_DeNovo_contig_274378	Quail_Scaffolded_DeNovo_contig_376	5339
Quail_Naked_DeNovo_contig_322396	Quail_Scaffolded_DeNovo_contig_376	12005
Quail_Naked_DeNovo_contig_172127	Quail_Scaffolded_DeNovo_contig_422	196061
Quail_Naked_DeNovo_contig_108705	Quail_Scaffolded_DeNovo_contig_466	566
Quail_Naked_DeNovo_contig_33951	Quail_Scaffolded_DeNovo_contig_498	10385
Quail_Naked_DeNovo_contig_25698	Quail_Scaffolded_DeNovo_contig_508	60155
Quail_Naked_DeNovo_contig_144168	Quail_Scaffolded_DeNovo_contig_563	748
Quail_Naked_DeNovo_contig_337716	Quail_Scaffolded_DeNovo_contig_585	151295
Quail_Naked_DeNovo_contig_17820	Quail_Scaffolded_DeNovo_contig_591	296
Quail_Naked_DeNovo_contig_67832	Quail_Scaffolded_DeNovo_contig_610	27479
Quail_Naked_DeNovo_contig_49809	Quail_Scaffolded_DeNovo_contig_713	88
Quail_Naked_DeNovo_contig_182373	Quail_Scaffolded_DeNovo_contig_723	9410
Quail_Naked_DeNovo_contig_239042	Quail_Scaffolded_DeNovo_contig_785	134029
Quail_Naked_DeNovo_contig_233640	Quail_Scaffolded_DeNovo_contig_817	10889
Quail_Naked_DeNovo_contig_232869	Quail_Scaffolded_DeNovo_contig_839	1
Quail_Naked_DeNovo_contig_174230	Quail_Scaffolded_DeNovo_contig_939	1
Quail_Naked_DeNovo_contig_5052	Quail_Scaffolded_DeNovo_contig_946	89
Quail_Naked_DeNovo_contig_78493	Quail_Scaffolded_DeNovo_contig_954	1559
Quail_Naked_DeNovo_contig_38803	Quail_Scaffolded_DeNovo_contig_1091	8497
Quail_Naked_DeNovo_contig_63535	Quail_Scaffolded_DeNovo_contig_1091	8497
Quail_Naked_DeNovo_contig_62053	Quail_Scaffolded_DeNovo_contig_1169	1
Quail_Naked_DeNovo_contig_157699	Quail_Scaffolded_DeNovo_contig_1169	50780
Quail_Naked_DeNovo_contig_1611	Quail_Scaffolded_DeNovo_contig_1170	1
Quail_Naked_DeNovo_contig_163100	Quail_Scaffolded_DeNovo_contig_1210	34783
Quail_Naked_DeNovo_contig_136645	Quail_Scaffolded_DeNovo_contig_1257	71095
Quail_Naked_DeNovo_contig_50188	Quail_Scaffolded_DeNovo_contig_1304	6264
Quail_Naked_DeNovo_contig_186820	Quail_Scaffolded_DeNovo_contig_1305	33079
Quail_Naked_DeNovo_contig_90736	Quail_Scaffolded_DeNovo_contig_1326	4775
Quail_Naked_DeNovo_contig_192074	Quail_Scaffolded_DeNovo_contig_1326	6584
Quail_Naked_DeNovo_contig_232060	Quail_Scaffolded_DeNovo_contig_1374	60891
Quail_Naked_DeNovo_contig_17077	Quail_Scaffolded_DeNovo_contig_1437	306
Quail_Naked_DeNovo_contig_188481	Quail_Scaffolded_DeNovo_contig_1474	5148
Quail_Naked_DeNovo_contig_175937	Quail_Scaffolded_DeNovo_contig_1481	119097
Quail_Naked_DeNovo_contig_291999	Quail_Scaffolded_DeNovo_contig_1484	14729
Quail_Naked_DeNovo_contig_288615	Quail_Scaffolded_DeNovo_contig_1507	5788
Quail_Naked_DeNovo_contig_10222	Quail_Scaffolded_DeNovo_contig_1507	6046
Quail_Naked_DeNovo_contig_350994	Quail_Scaffolded_DeNovo_contig_1511	1
Quail_Naked_DeNovo_contig_219126	Quail_Scaffolded_DeNovo_contig_1545	21554
Quail_Naked_DeNovo_contig_94636	Quail_Scaffolded_DeNovo_contig_1546	12
Quail_Naked_DeNovo_contig_44249	Quail_Scaffolded_DeNovo_contig_1546	2446
Quail_Naked_DeNovo_contig_77622	Quail_Scaffolded_DeNovo_contig_1550	6559
Quail_Naked_DeNovo_contig_287606	Quail_Scaffolded_DeNovo_contig_1550	7590
Quail_Naked_DeNovo_contig_100051	Quail_Scaffolded_DeNovo_contig_1570	30297
Quail_Naked_DeNovo_contig_246350	Quail_Scaffolded_DeNovo_contig_1572	45595
Quail_Naked_DeNovo_contig_158134	Quail_Scaffolded_DeNovo_contig_1655	3014
Quail_Naked_DeNovo_contig_26238	Quail_Scaffolded_DeNovo_contig_1690	194312
Quail_Naked_DeNovo_contig_11662	Quail_Scaffolded_DeNovo_contig_1694	2717
Quail_Naked_DeNovo_contig_175891	Quail_Scaffolded_DeNovo_contig_1701	114212
Quail_Naked_DeNovo_contig_288861	Quail_Scaffolded_DeNovo_contig_1702	146714
Quail_Naked_DeNovo_contig_40243	Quail_Scaffolded_DeNovo_contig_1743	1
Quail_Naked_DeNovo_contig_203629	Quail_Scaffolded_DeNovo_contig_1744	44040
Quail_Naked_DeNovo_contig_132691	Quail_Scaffolded_DeNovo_contig_1750	1
Quail_Naked_DeNovo_contig_39799	Quail_Scaffolded_DeNovo_contig_1787	83
Quail_Naked_DeNovo_contig_244133	Quail_Scaffolded_DeNovo_contig_1800	18831
Quail_Naked_DeNovo_contig_69044	Quail_Scaffolded_DeNovo_contig_1815	4962
Quail_Naked_DeNovo_contig_132116	Quail_Scaffolded_DeNovo_contig_1818	636
Quail_Naked_DeNovo_contig_138697	Quail_Scaffolded_DeNovo_contig_1823	4917
Quail_Naked_DeNovo_contig_50599	Quail_Scaffolded_DeNovo_contig_1838	6805
Quail_Naked_DeNovo_contig_245985	Quail_Scaffolded_DeNovo_contig_1864	61397
Quail_Naked_DeNovo_contig_101816	Quail_Scaffolded_DeNovo_contig_1897	10899
Quail_Naked_DeNovo_contig_216273	Quail_Scaffolded_DeNovo_contig_2034	121200
Quail_Naked_DeNovo_contig_234957	Quail_Scaffolded_DeNovo_contig_2050	40513
Quail_Naked_DeNovo_contig_75296	Quail_Scaffolded_DeNovo_contig_2055	242959
Quail_Naked_DeNovo_contig_68941	Quail_Scaffolded_DeNovo_contig_2097	1
Quail_Naked_DeNovo_contig_3041	Quail_Scaffolded_DeNovo_contig_2097	1651
Quail_Naked_DeNovo_contig_154822	Quail_Scaffolded_DeNovo_contig_2199	5687
Quail_Naked_DeNovo_contig_180985	Quail_Scaffolded_DeNovo_contig_2217	583
Quail_Naked_DeNovo_contig_32503	Quail_Scaffolded_DeNovo_contig_2244	190557
Quail_Naked_DeNovo_contig_69986	Quail_Scaffolded_DeNovo_contig_2337	11869
Quail_Naked_DeNovo_contig_55508	Quail_Scaffolded_DeNovo_contig_2357	1
Quail_Naked_DeNovo_contig_306524	Quail_Scaffolded_DeNovo_contig_2360	37861
Quail_Naked_DeNovo_contig_141522	Quail_Scaffolded_DeNovo_contig_2362	79
Quail_Naked_DeNovo_contig_276824	Quail_Scaffolded_DeNovo_contig_2423	32160
Quail_Naked_DeNovo_contig_232380	Quail_Scaffolded_DeNovo_contig_2434	21576
Quail_Naked_DeNovo_contig_107835	Quail_Scaffolded_DeNovo_contig_2490	134674
Quail_Naked_DeNovo_contig_247012	Quail_Scaffolded_DeNovo_contig_2515	118099
Quail_Naked_DeNovo_contig_84127	Quail_Scaffolded_DeNovo_contig_2517	2888
Quail_Naked_DeNovo_contig_4771	Quail_Scaffolded_DeNovo_contig_2553	3790
Quail_Naked_DeNovo_contig_296617	Quail_Scaffolded_DeNovo_contig_2626	66951
Quail_Naked_DeNovo_contig_293072	Quail_Scaffolded_DeNovo_contig_2639	11887
Quail_Naked_DeNovo_contig_21618	Quail_Scaffolded_DeNovo_contig_2710	109348
Quail_Naked_DeNovo_contig_210109	Quail_Scaffolded_DeNovo_contig_2798	17417
Quail_Naked_DeNovo_contig_340687	Quail_Scaffolded_DeNovo_contig_2831	261373
Quail_Naked_DeNovo_contig_222000	Quail_Scaffolded_DeNovo_contig_2836	18815
Quail_Naked_DeNovo_contig_20858	Quail_Scaffolded_DeNovo_contig_2856	194436
Quail_Naked_DeNovo_contig_169248	Quail_Scaffolded_DeNovo_contig_2947	1813
Quail_Naked_DeNovo_contig_359959	Quail_Scaffolded_DeNovo_contig_3001	10620
Quail_Naked_DeNovo_contig_298060	Quail_Scaffolded_DeNovo_contig_3022	242189
Quail_Naked_DeNovo_contig_158854	Quail_Scaffolded_DeNovo_contig_3040	35879
Quail_Naked_DeNovo_contig_332897	Quail_Scaffolded_DeNovo_contig_3040	35879
Quail_Naked_DeNovo_contig_2824	Quail_Scaffolded_DeNovo_contig_3060	1
Quail_Naked_DeNovo_contig_165811	Quail_Scaffolded_DeNovo_contig_3102	63417
Quail_Naked_DeNovo_contig_5124	Quail_Scaffolded_DeNovo_contig_3107	1
Quail_Naked_DeNovo_contig_314904	Quail_Scaffolded_DeNovo_contig_3127	146367
Quail_Naked_DeNovo_contig_35914	Quail_Scaffolded_DeNovo_contig_3145	11584
Quail_Naked_DeNovo_contig_225636	Quail_Scaffolded_DeNovo_contig_3158	13525
Quail_Naked_DeNovo_contig_50853	Quail_Scaffolded_DeNovo_contig_3179	7591
Quail_Naked_DeNovo_contig_43988	Quail_Scaffolded_DeNovo_contig_3210	1
Quail_Naked_DeNovo_contig_119947	Quail_Scaffolded_DeNovo_contig_3372	83445
Quail_Naked_DeNovo_contig_65972	Quail_Scaffolded_DeNovo_contig_3448	339
Quail_Naked_DeNovo_contig_204246	Quail_Scaffolded_DeNovo_contig_3473	113239
Quail_Naked_DeNovo_contig_3832	Quail_Scaffolded_DeNovo_contig_3491	1
Quail_Naked_DeNovo_contig_280841	Quail_Scaffolded_DeNovo_contig_3517	21427
Quail_Naked_DeNovo_contig_6543	Quail_Scaffolded_DeNovo_contig_3518	2801
Quail_Naked_DeNovo_contig_8037	Quail_Scaffolded_DeNovo_contig_3552	1
Quail_Naked_DeNovo_contig_92977	Quail_Scaffolded_DeNovo_contig_3577	1
Quail_Naked_DeNovo_contig_4247	Quail_Scaffolded_DeNovo_contig_3645	6958
Quail_Naked_DeNovo_contig_2595	Quail_Scaffolded_DeNovo_contig_3849	1
Quail_Naked_DeNovo_contig_136813	Quail_Scaffolded_DeNovo_contig_3854	1037
Quail_Naked_DeNovo_contig_304304	Quail_Scaffolded_DeNovo_contig_3894	104588
Quail_Naked_DeNovo_contig_245303	Quail_Scaffolded_DeNovo_contig_3909	26603
Quail_Naked_DeNovo_contig_243835	Quail_Scaffolded_DeNovo_contig_3924	23002
Quail_Naked_DeNovo_contig_151731	Quail_Scaffolded_DeNovo_contig_4034	1
Quail_Naked_DeNovo_contig_70738	Quail_Scaffolded_DeNovo_contig_4101	3513
Quail_Naked_DeNovo_contig_42764	Quail_Scaffolded_DeNovo_contig_4201	1
Quail_Naked_DeNovo_contig_155130	Quail_Scaffolded_DeNovo_contig_4307	134649
Quail_Naked_DeNovo_contig_306715	Quail_Scaffolded_DeNovo_contig_4309	52013
Quail_Naked_DeNovo_contig_101224	Quail_Scaffolded_DeNovo_contig_4352	30855
Quail_Naked_DeNovo_contig_33509	Quail_Scaffolded_DeNovo_contig_4358	1606
Quail_Naked_DeNovo_contig_276838	Quail_Scaffolded_DeNovo_contig_4424	1
Quail_Naked_DeNovo_contig_293428	Quail_Scaffolded_DeNovo_contig_4642	30923
Quail_Naked_DeNovo_contig_262911	Quail_Scaffolded_DeNovo_contig_4696	108150
Quail_Naked_DeNovo_contig_285111	Quail_Scaffolded_DeNovo_contig_4740	23627
Quail_Naked_DeNovo_contig_247145	Quail_Scaffolded_DeNovo_contig_4764	47590
Quail_Naked_DeNovo_contig_310347	Quail_Scaffolded_DeNovo_contig_4792	159729
Quail_Naked_DeNovo_contig_47268	Quail_Scaffolded_DeNovo_contig_4896	26826
Quail_Naked_DeNovo_contig_59090	Quail_Scaffolded_DeNovo_contig_4899	1
Quail_Naked_DeNovo_contig_157350	Quail_Scaffolded_DeNovo_contig_4911	26430
Quail_Naked_DeNovo_contig_253339	Quail_Scaffolded_DeNovo_contig_5106	12221
Quail_Naked_DeNovo_contig_144341	Quail_Scaffolded_DeNovo_contig_5138	160495
Quail_Naked_DeNovo_contig_91657	Quail_Scaffolded_DeNovo_contig_5175	1
Quail_Naked_DeNovo_contig_182267	Quail_Scaffolded_DeNovo_contig_5187	124465
Quail_Naked_DeNovo_contig_227056	Quail_Scaffolded_DeNovo_contig_5199	1
Quail_Naked_DeNovo_contig_10886	Quail_Scaffolded_DeNovo_contig_5217	300
Quail_Naked_DeNovo_contig_5818	Quail_Scaffolded_DeNovo_contig_5274	25
Quail_Naked_DeNovo_contig_6211	Quail_Scaffolded_DeNovo_contig_5298	1
Quail_Naked_DeNovo_contig_16888	Quail_Scaffolded_DeNovo_contig_5317	2584
Quail_Naked_DeNovo_contig_30897	Quail_Scaffolded_DeNovo_contig_5331	102337
Quail_Naked_DeNovo_contig_272088	Quail_Scaffolded_DeNovo_contig_5349	2997
Quail_Naked_DeNovo_contig_272089	Quail_Scaffolded_DeNovo_contig_5349	3007
Quail_Naked_DeNovo_contig_15232	Quail_Scaffolded_DeNovo_contig_5354	13589
Quail_Naked_DeNovo_contig_22068	Quail_Scaffolded_DeNovo_contig_5440	4354
Quail_Naked_DeNovo_contig_23057	Quail_Scaffolded_DeNovo_contig_5550	6188
Quail_Naked_DeNovo_contig_194366	Quail_Scaffolded_DeNovo_contig_5563	161430
Quail_Naked_DeNovo_contig_227458	Quail_Scaffolded_DeNovo_contig_5572	31374
Quail_Naked_DeNovo_contig_152632	Quail_Scaffolded_DeNovo_contig_5572	44044
Quail_Naked_DeNovo_contig_315976	Quail_Scaffolded_DeNovo_contig_5572	44046
Quail_Naked_DeNovo_contig_323593	Quail_Scaffolded_DeNovo_contig_5572	44047
Quail_Naked_DeNovo_contig_178631	Quail_Scaffolded_DeNovo_contig_5575	175047
Quail_Naked_DeNovo_contig_126260	Quail_Scaffolded_DeNovo_contig_5652	1
Quail_Naked_DeNovo_contig_301658	Quail_Scaffolded_DeNovo_contig_5717	90744
Quail_Naked_DeNovo_contig_92932	Quail_Scaffolded_DeNovo_contig_5871	27581
Quail_Naked_DeNovo_contig_4853	Quail_Scaffolded_DeNovo_contig_5911	1
Quail_Naked_DeNovo_contig_43018	Quail_Scaffolded_DeNovo_contig_5941	656
Quail_Naked_DeNovo_contig_100626	Quail_Scaffolded_DeNovo_contig_5966	48497
Quail_Naked_DeNovo_contig_260753	Quail_Scaffolded_DeNovo_contig_5993	98203
Quail_Naked_DeNovo_contig_251160	Quail_Scaffolded_DeNovo_contig_6041	17117
Quail_Naked_DeNovo_contig_223226	Quail_Scaffolded_DeNovo_contig_6097	44194
Quail_Naked_DeNovo_contig_342862	Quail_Scaffolded_DeNovo_contig_6097	44194
Quail_Naked_DeNovo_contig_139752	Quail_Scaffolded_DeNovo_contig_6128	31090
Quail_Naked_DeNovo_contig_143614	Quail_Scaffolded_DeNovo_contig_6211	800
Quail_Naked_DeNovo_contig_142804	Quail_Scaffolded_DeNovo_contig_6211	1034
Quail_Naked_DeNovo_contig_17829	Quail_Scaffolded_DeNovo_contig_6293	1
Quail_Naked_DeNovo_contig_43203	Quail_Scaffolded_DeNovo_contig_6315	1
Quail_Naked_DeNovo_contig_311266	Quail_Scaffolded_DeNovo_contig_6659	1640
Quail_Naked_DeNovo_contig_49171	Quail_Scaffolded_DeNovo_contig_6665	14188
Quail_Naked_DeNovo_contig_5013	Quail_Scaffolded_DeNovo_contig_6709	79835
Quail_Naked_DeNovo_contig_162345	Quail_Scaffolded_DeNovo_contig_6731	1
Quail_Naked_DeNovo_contig_118789	Quail_Scaffolded_DeNovo_contig_6731	2487
Quail_Naked_DeNovo_contig_156115	Quail_Scaffolded_DeNovo_contig_6819	1
Quail_Naked_DeNovo_contig_11560	Quail_Scaffolded_DeNovo_contig_6868	17909
Quail_Naked_DeNovo_contig_25877	Quail_Scaffolded_DeNovo_contig_6926	95401
Quail_Naked_DeNovo_contig_169512	Quail_Scaffolded_DeNovo_contig_6926	97512
Quail_Naked_DeNovo_contig_55904	Quail_Scaffolded_DeNovo_contig_6927	1
Quail_Naked_DeNovo_contig_339097	Quail_Scaffolded_DeNovo_contig_6935	26560
Quail_Naked_DeNovo_contig_86082	Quail_Scaffolded_DeNovo_contig_6935	26560
Quail_Naked_DeNovo_contig_10283	Quail_Scaffolded_DeNovo_contig_7076	1
Quail_Naked_DeNovo_contig_61112	Quail_Scaffolded_DeNovo_contig_7076	1154
Quail_Naked_DeNovo_contig_15330	Quail_Scaffolded_DeNovo_contig_7134	1
Quail_Naked_DeNovo_contig_112580	Quail_Scaffolded_DeNovo_contig_7158	1
Quail_Naked_DeNovo_contig_5441	Quail_Scaffolded_DeNovo_contig_7262	34783
Quail_Naked_DeNovo_contig_126648	Quail_Scaffolded_DeNovo_contig_7304	82595
Quail_Naked_DeNovo_contig_170868	Quail_Scaffolded_DeNovo_contig_7350	4521
Quail_Naked_DeNovo_contig_58693	Quail_Scaffolded_DeNovo_contig_7351	1
Quail_Naked_DeNovo_contig_116650	Quail_Scaffolded_DeNovo_contig_7512	23092
Quail_Naked_DeNovo_contig_20996	Quail_Scaffolded_DeNovo_contig_7597	1
Quail_Naked_DeNovo_contig_194045	Quail_Scaffolded_DeNovo_contig_7797	67799
Quail_Naked_DeNovo_contig_109509	Quail_Scaffolded_DeNovo_contig_7952	4613
Quail_Naked_DeNovo_contig_10312	Quail_Scaffolded_DeNovo_contig_7963	4
Quail_Naked_DeNovo_contig_243446	Quail_Scaffolded_DeNovo_contig_7987	55088
Quail_Naked_DeNovo_contig_9271	Quail_Scaffolded_DeNovo_contig_8055	1
Quail_Naked_DeNovo_contig_257012	Quail_Scaffolded_DeNovo_contig_8181	193
Quail_Naked_DeNovo_contig_62462	Quail_Scaffolded_DeNovo_contig_8243	2817
Quail_Naked_DeNovo_contig_24700	Quail_Scaffolded_DeNovo_contig_8247	1
Quail_Naked_DeNovo_contig_197294	Quail_Scaffolded_DeNovo_contig_8255	48395
Quail_Naked_DeNovo_contig_325314	Quail_Scaffolded_DeNovo_contig_8307	3570
Quail_Naked_DeNovo_contig_46392	Quail_Scaffolded_DeNovo_contig_8313	1
Quail_Naked_DeNovo_contig_122709	Quail_Scaffolded_DeNovo_contig_8379	24921
Quail_Naked_DeNovo_contig_126562	Quail_Scaffolded_DeNovo_contig_8381	14522
Quail_Naked_DeNovo_contig_22746	Quail_Scaffolded_DeNovo_contig_8563	2815
Quail_Naked_DeNovo_contig_23285	Quail_Scaffolded_DeNovo_contig_8563	9468
Quail_Naked_DeNovo_contig_54544	Quail_Scaffolded_DeNovo_contig_8691	46911
Quail_Naked_DeNovo_contig_107523	Quail_Scaffolded_DeNovo_contig_8702	1
Quail_Naked_DeNovo_contig_107594	Quail_Scaffolded_DeNovo_contig_8702	67332
Quail_Naked_DeNovo_contig_50551	Quail_Scaffolded_DeNovo_contig_8749	91527
Quail_Naked_DeNovo_contig_204005	Quail_Scaffolded_DeNovo_contig_8757	21106
Quail_Naked_DeNovo_contig_157189	Quail_Scaffolded_DeNovo_contig_8903	35311
Quail_Naked_DeNovo_contig_110771	Quail_Scaffolded_DeNovo_contig_8985	7335
Quail_Naked_DeNovo_contig_155889	Quail_Scaffolded_DeNovo_contig_8990	1
Quail_Naked_DeNovo_contig_133991	Quail_Scaffolded_DeNovo_contig_8990	72390
Quail_Naked_DeNovo_contig_249122	Quail_Scaffolded_DeNovo_contig_9102	17247
Quail_Naked_DeNovo_contig_20418	Quail_Scaffolded_DeNovo_contig_9109	1
Quail_Naked_DeNovo_contig_292239	Quail_Scaffolded_DeNovo_contig_9243	1
Quail_Naked_DeNovo_contig_286401	Quail_Scaffolded_DeNovo_contig_9249	35498
Quail_Naked_DeNovo_contig_21084	Quail_Scaffolded_DeNovo_contig_9332	20212
Quail_Naked_DeNovo_contig_141991	Quail_Scaffolded_DeNovo_contig_9369	17381
Quail_Naked_DeNovo_contig_150308	Quail_Scaffolded_DeNovo_contig_9384	19193
Quail_Naked_DeNovo_contig_362330	Quail_Scaffolded_DeNovo_contig_9453	14238
Quail_Naked_DeNovo_contig_268639	Quail_Scaffolded_DeNovo_contig_9547	5858
Quail_Naked_DeNovo_contig_5950	Quail_Scaffolded_DeNovo_contig_9609	1
Quail_Naked_DeNovo_contig_37623	Quail_Scaffolded_DeNovo_contig_9647	43131
Quail_Naked_DeNovo_contig_136041	Quail_Scaffolded_DeNovo_contig_9664	187
Quail_Naked_DeNovo_contig_159860	Quail_Scaffolded_DeNovo_contig_9740	421
Quail_Naked_DeNovo_contig_307202	Quail_Scaffolded_DeNovo_contig_9754	54155
Quail_Naked_DeNovo_contig_371756	Quail_Scaffolded_DeNovo_contig_9754	54480
Quail_Naked_DeNovo_contig_58934	Quail_Scaffolded_DeNovo_contig_9939	10
Quail_Naked_DeNovo_contig_279051	Quail_Scaffolded_DeNovo_contig_9939	157
Quail_Naked_DeNovo_contig_73906	Quail_Scaffolded_DeNovo_contig_9941	1
Quail_Naked_DeNovo_contig_26520	Quail_Scaffolded_DeNovo_contig_9961	1
Quail_Naked_DeNovo_contig_54707	Quail_Scaffolded_DeNovo_contig_10056	1
Quail_Naked_DeNovo_contig_203735	Quail_Scaffolded_DeNovo_contig_10056	34844
Quail_Naked_DeNovo_contig_254569	Quail_Scaffolded_DeNovo_contig_10088	9252
Quail_Naked_DeNovo_contig_23774	Quail_Scaffolded_DeNovo_contig_10224	1
Quail_Naked_DeNovo_contig_64337	Quail_Scaffolded_DeNovo_contig_10276	21002
Quail_Naked_DeNovo_contig_52732	Quail_Scaffolded_DeNovo_contig_10291	1
Quail_Naked_DeNovo_contig_14770	Quail_Scaffolded_DeNovo_contig_10368	35586
Quail_Naked_DeNovo_contig_190099	Quail_Scaffolded_DeNovo_contig_10368	41363
Quail_Naked_DeNovo_contig_124152	Quail_Scaffolded_DeNovo_contig_10388	34066
Quail_Naked_DeNovo_contig_137892	Quail_Scaffolded_DeNovo_contig_10419	13141
Quail_Naked_DeNovo_contig_55819	Quail_Scaffolded_DeNovo_contig_10490	1
Quail_Naked_DeNovo_contig_269909	Quail_Scaffolded_DeNovo_contig_10510	63162
Quail_Naked_DeNovo_contig_300210	Quail_Scaffolded_DeNovo_contig_10514	31388
Quail_Naked_DeNovo_contig_191199	Quail_Scaffolded_DeNovo_contig_10535	4845
Quail_Naked_DeNovo_contig_11755	Quail_Scaffolded_DeNovo_contig_10592	1
Quail_Naked_DeNovo_contig_16718	Quail_Scaffolded_DeNovo_contig_10603	1
Quail_Naked_DeNovo_contig_182917	Quail_Scaffolded_DeNovo_contig_10629	79144
Quail_Naked_DeNovo_contig_316462	Quail_Scaffolded_DeNovo_contig_10699	44109
Quail_Naked_DeNovo_contig_127083	Quail_Scaffolded_DeNovo_contig_10706	33401
Quail_Naked_DeNovo_contig_246944	Quail_Scaffolded_DeNovo_contig_10722	20738
Quail_Naked_DeNovo_contig_197435	Quail_Scaffolded_DeNovo_contig_10751	1
Quail_Naked_DeNovo_contig_22582	Quail_Scaffolded_DeNovo_contig_10760	1
Quail_Naked_DeNovo_contig_22585	Quail_Scaffolded_DeNovo_contig_10763	36811
Quail_Naked_DeNovo_contig_266767	Quail_Scaffolded_DeNovo_contig_10771	14542
Quail_Naked_DeNovo_contig_153116	Quail_Scaffolded_DeNovo_contig_10806	77547
Quail_Naked_DeNovo_contig_147575	Quail_Scaffolded_DeNovo_contig_10824	42441
Quail_Naked_DeNovo_contig_361739	Quail_Scaffolded_DeNovo_contig_10849	78351
Quail_Naked_DeNovo_contig_29665	Quail_Scaffolded_DeNovo_contig_10896	1
Quail_Naked_DeNovo_contig_217039	Quail_Scaffolded_DeNovo_contig_10959	106387
Quail_Naked_DeNovo_contig_50497	Quail_Scaffolded_DeNovo_contig_10986	687
Quail_Naked_DeNovo_contig_192524	Quail_Scaffolded_DeNovo_contig_11019	87847
Quail_Naked_DeNovo_contig_125633	Quail_Scaffolded_DeNovo_contig_11029	47188
Quail_Naked_DeNovo_contig_86276	Quail_Scaffolded_DeNovo_contig_11071	1
Quail_Naked_DeNovo_contig_26001	Quail_Scaffolded_DeNovo_contig_11099	147
Quail_Naked_DeNovo_contig_50315	Quail_Scaffolded_DeNovo_contig_11166	290075
Quail_Naked_DeNovo_contig_98074	Quail_Scaffolded_DeNovo_contig_11187	62774
Quail_Naked_DeNovo_contig_284804	Quail_Scaffolded_DeNovo_contig_11323	13858
Quail_Naked_DeNovo_contig_22634	Quail_Scaffolded_DeNovo_contig_11347	1
Quail_Naked_DeNovo_contig_16823	Quail_Scaffolded_DeNovo_contig_11443	49177
Quail_Naked_DeNovo_contig_179046	Quail_Scaffolded_DeNovo_contig_11496	188539
Quail_Naked_DeNovo_contig_315338	Quail_Scaffolded_DeNovo_contig_11505	7628
Quail_Naked_DeNovo_contig_26759	Quail_Scaffolded_DeNovo_contig_11681	1
Quail_Naked_DeNovo_contig_5430	Quail_Scaffolded_DeNovo_contig_11695	20
Quail_Naked_DeNovo_contig_208722	Quail_Scaffolded_DeNovo_contig_11755	63106
Quail_Naked_DeNovo_contig_98065	Quail_Scaffolded_DeNovo_contig_11756	1
Quail_Naked_DeNovo_contig_99466	Quail_Scaffolded_DeNovo_contig_11832	65700
Quail_Naked_DeNovo_contig_291227	Quail_Scaffolded_DeNovo_contig_11849	22
Quail_Naked_DeNovo_contig_315118	Quail_Scaffolded_DeNovo_contig_11849	22
Quail_Naked_DeNovo_contig_81756	Quail_Scaffolded_DeNovo_contig_11930	4
Quail_Naked_DeNovo_contig_92125	Quail_Scaffolded_DeNovo_contig_11941	1
Quail_Naked_DeNovo_contig_128252	Quail_Scaffolded_DeNovo_contig_11945	31950
Quail_Naked_DeNovo_contig_228916	Quail_Scaffolded_DeNovo_contig_12120	69146
Quail_Naked_DeNovo_contig_17060	Quail_Scaffolded_DeNovo_contig_12183	1
Quail_Naked_DeNovo_contig_146718	Quail_Scaffolded_DeNovo_contig_12345	2663
Quail_Naked_DeNovo_contig_109637	Quail_Scaffolded_DeNovo_contig_12391	18755
Quail_Naked_DeNovo_contig_253037	Quail_Scaffolded_DeNovo_contig_12415	2484
Quail_Naked_DeNovo_contig_236553	Quail_Scaffolded_DeNovo_contig_12450	22613
Quail_Naked_DeNovo_contig_13235	Quail_Scaffolded_DeNovo_contig_12474	1
Quail_Naked_DeNovo_contig_3817	Quail_Scaffolded_DeNovo_contig_12586	2222
Quail_Naked_DeNovo_contig_24118	Quail_Scaffolded_DeNovo_contig_12660	172
Quail_Naked_DeNovo_contig_273224	Quail_Scaffolded_DeNovo_contig_12730	1
Quail_Naked_DeNovo_contig_316207	Quail_Scaffolded_DeNovo_contig_12849	92930
Quail_Naked_DeNovo_contig_44091	Quail_Scaffolded_DeNovo_contig_12854	313
Quail_Naked_DeNovo_contig_143736	Quail_Scaffolded_DeNovo_contig_12894	1
Quail_Naked_DeNovo_contig_29627	Quail_Scaffolded_DeNovo_contig_12915	2112
Quail_Naked_DeNovo_contig_142682	Quail_Scaffolded_DeNovo_contig_12960	900
Quail_Naked_DeNovo_contig_202958	Quail_Scaffolded_DeNovo_contig_12993	749
Quail_Naked_DeNovo_contig_16644	Quail_Scaffolded_DeNovo_contig_13046	17159
Quail_Naked_DeNovo_contig_195222	Quail_Scaffolded_DeNovo_contig_13096	52856
Quail_Naked_DeNovo_contig_32488	Quail_Scaffolded_DeNovo_contig_13127	1
Quail_Naked_DeNovo_contig_261141	Quail_Scaffolded_DeNovo_contig_13128	4358
Quail_Naked_DeNovo_contig_118501	Quail_Scaffolded_DeNovo_contig_13128	60250
Quail_Naked_DeNovo_contig_138427	Quail_Scaffolded_DeNovo_contig_13150	1
Quail_Naked_DeNovo_contig_354167	Quail_Scaffolded_DeNovo_contig_13324	50700
Quail_Naked_DeNovo_contig_366997	Quail_Scaffolded_DeNovo_contig_13324	50700
Quail_Naked_DeNovo_contig_141755	Quail_Scaffolded_DeNovo_contig_13362	26672
Quail_Naked_DeNovo_contig_324126	Quail_Scaffolded_DeNovo_contig_13367	54108
Quail_Naked_DeNovo_contig_21511	Quail_Scaffolded_DeNovo_contig_13392	1
Quail_Naked_DeNovo_contig_19320	Quail_Scaffolded_DeNovo_contig_13434	1
Quail_Naked_DeNovo_contig_70618	Quail_Scaffolded_DeNovo_contig_13502	1
Quail_Naked_DeNovo_contig_49236	Quail_Scaffolded_DeNovo_contig_13542	180
Quail_Naked_DeNovo_contig_53233	Quail_Scaffolded_DeNovo_contig_13564	45281
Quail_Naked_DeNovo_contig_16107	Quail_Scaffolded_DeNovo_contig_13622	1
Quail_Naked_DeNovo_contig_112344	Quail_Scaffolded_DeNovo_contig_13688	13749
Quail_Naked_DeNovo_contig_210988	Quail_Scaffolded_DeNovo_contig_13773	87872
Quail_Naked_DeNovo_contig_214988	Quail_Scaffolded_DeNovo_contig_13850	12069
Quail_Naked_DeNovo_contig_327591	Quail_Scaffolded_DeNovo_contig_13938	10192
Quail_Naked_DeNovo_contig_113057	Quail_Scaffolded_DeNovo_contig_14045	315
Quail_Naked_DeNovo_contig_303224	Quail_Scaffolded_DeNovo_contig_14051	133
Quail_Naked_DeNovo_contig_156383	Quail_Scaffolded_DeNovo_contig_14141	189
Quail_Naked_DeNovo_contig_316292	Quail_Scaffolded_DeNovo_contig_14204	720
Quail_Naked_DeNovo_contig_202320	Quail_Scaffolded_DeNovo_contig_14218	4094
Quail_Naked_DeNovo_contig_156490	Quail_Scaffolded_DeNovo_contig_14431	33257
Quail_Naked_DeNovo_contig_119791	Quail_Scaffolded_DeNovo_contig_14449	1
Quail_Naked_DeNovo_contig_17582	Quail_Scaffolded_DeNovo_contig_14450	66
Quail_Naked_DeNovo_contig_25851	Quail_Scaffolded_DeNovo_contig_14472	24638
Quail_Naked_DeNovo_contig_251719	Quail_Scaffolded_DeNovo_contig_14474	44341
Quail_Naked_DeNovo_contig_112164	Quail_Scaffolded_DeNovo_contig_14514	27822
Quail_Naked_DeNovo_contig_40421	Quail_Scaffolded_DeNovo_contig_14526	36835
Quail_Naked_DeNovo_contig_101134	Quail_Scaffolded_DeNovo_contig_14553	33549
Quail_Naked_DeNovo_contig_293552	Quail_Scaffolded_DeNovo_contig_14626	35736
Quail_Naked_DeNovo_contig_79643	Quail_Scaffolded_DeNovo_contig_14653	43090
Quail_Naked_DeNovo_contig_154865	Quail_Scaffolded_DeNovo_contig_14726	28960
Quail_Naked_DeNovo_contig_20365	Quail_Scaffolded_DeNovo_contig_14746	5814
Quail_Naked_DeNovo_contig_103267	Quail_Scaffolded_DeNovo_contig_14770	23438
Quail_Naked_DeNovo_contig_183197	Quail_Scaffolded_DeNovo_contig_14991	1
Quail_Naked_DeNovo_contig_296033	Quail_Scaffolded_DeNovo_contig_15081	13822
Quail_Naked_DeNovo_contig_126624	Quail_Scaffolded_DeNovo_contig_15104	1
Quail_Naked_DeNovo_contig_183773	Quail_Scaffolded_DeNovo_contig_15113	2404
Quail_Naked_DeNovo_contig_20686	Quail_Scaffolded_DeNovo_contig_15124	1
Quail_Naked_DeNovo_contig_289640	Quail_Scaffolded_DeNovo_contig_15240	21885
Quail_Naked_DeNovo_contig_44535	Quail_Scaffolded_DeNovo_contig_15330	1
Quail_Naked_DeNovo_contig_304719	Quail_Scaffolded_DeNovo_contig_15384	56887
Quail_Naked_DeNovo_contig_38180	Quail_Scaffolded_DeNovo_contig_15410	1
Quail_Naked_DeNovo_contig_159728	Quail_Scaffolded_DeNovo_contig_15514	18675
Quail_Naked_DeNovo_contig_333735	Quail_Scaffolded_DeNovo_contig_15522	44827
Quail_Naked_DeNovo_contig_304919	Quail_Scaffolded_DeNovo_contig_15522	90592
Quail_Naked_DeNovo_contig_11628	Quail_Scaffolded_DeNovo_contig_15523	316
Quail_Naked_DeNovo_contig_17079	Quail_Scaffolded_DeNovo_contig_15593	1
Quail_Naked_DeNovo_contig_102696	Quail_Scaffolded_DeNovo_contig_15660	20165
Quail_Naked_DeNovo_contig_289073	Quail_Scaffolded_DeNovo_contig_15667	66811
Quail_Naked_DeNovo_contig_39137	Quail_Scaffolded_DeNovo_contig_15713	1
Quail_Naked_DeNovo_contig_51677	Quail_Scaffolded_DeNovo_contig_15749	935
Quail_Naked_DeNovo_contig_63196	Quail_Scaffolded_DeNovo_contig_15868	12
Quail_Naked_DeNovo_contig_233556	Quail_Scaffolded_DeNovo_contig_16229	1
Quail_Naked_DeNovo_contig_267985	Quail_Scaffolded_DeNovo_contig_16289	2106
Quail_Naked_DeNovo_contig_87993	Quail_Scaffolded_DeNovo_contig_16297	3449
Quail_Naked_DeNovo_contig_149469	Quail_Scaffolded_DeNovo_contig_16517	31956
Quail_Naked_DeNovo_contig_49705	Quail_Scaffolded_DeNovo_contig_16543	4576
Quail_Naked_DeNovo_contig_267741	Quail_Scaffolded_DeNovo_contig_16620	55
Quail_Naked_DeNovo_contig_263884	Quail_Scaffolded_DeNovo_contig_16667	35854
Quail_Naked_DeNovo_contig_30522	Quail_Scaffolded_DeNovo_contig_16761	1
Quail_Naked_DeNovo_contig_163909	Quail_Scaffolded_DeNovo_contig_16799	1145
Quail_Naked_DeNovo_contig_330830	Quail_Scaffolded_DeNovo_contig_16810	54204
Quail_Naked_DeNovo_contig_47192	Quail_Scaffolded_DeNovo_contig_16883	5792
Quail_Naked_DeNovo_contig_264540	Quail_Scaffolded_DeNovo_contig_16899	156
Quail_Naked_DeNovo_contig_229854	Quail_Scaffolded_DeNovo_contig_16958	31835
Quail_Naked_DeNovo_contig_77499	Quail_Scaffolded_DeNovo_contig_16978	13452
Quail_Naked_DeNovo_contig_308479	Quail_Scaffolded_DeNovo_contig_17031	8890
Quail_Naked_DeNovo_contig_17241	Quail_Scaffolded_DeNovo_contig_17107	12186
Quail_Naked_DeNovo_contig_110106	Quail_Scaffolded_DeNovo_contig_17124	7161
Quail_Naked_DeNovo_contig_188916	Quail_Scaffolded_DeNovo_contig_17188	1
Quail_Naked_DeNovo_contig_21837	Quail_Scaffolded_DeNovo_contig_17244	2636
Quail_Naked_DeNovo_contig_168930	Quail_Scaffolded_DeNovo_contig_17297	15606
Quail_Naked_DeNovo_contig_287814	Quail_Scaffolded_DeNovo_contig_17383	8290
Quail_Naked_DeNovo_contig_183772	Quail_Scaffolded_DeNovo_contig_17389	5029
Quail_Naked_DeNovo_contig_120754	Quail_Scaffolded_DeNovo_contig_17389	5400
Quail_Naked_DeNovo_contig_213343	Quail_Scaffolded_DeNovo_contig_17464	29930
Quail_Naked_DeNovo_contig_226088	Quail_Scaffolded_DeNovo_contig_17548	39270
Quail_Naked_DeNovo_contig_177637	Quail_Scaffolded_DeNovo_contig_17571	80220
Quail_Naked_DeNovo_contig_292148	Quail_Scaffolded_DeNovo_contig_17636	15460
Quail_Naked_DeNovo_contig_327721	Quail_Scaffolded_DeNovo_contig_17846	34573
Quail_Naked_DeNovo_contig_327738	Quail_Scaffolded_DeNovo_contig_17846	34573
Quail_Naked_DeNovo_contig_7091	Quail_Scaffolded_DeNovo_contig_17856	1190
Quail_Naked_DeNovo_contig_90452	Quail_Scaffolded_DeNovo_contig_18129	2739
Quail_Naked_DeNovo_contig_73384	Quail_Scaffolded_DeNovo_contig_18137	2306
Quail_Naked_DeNovo_contig_14353	Quail_Scaffolded_DeNovo_contig_18217	1
Quail_Naked_DeNovo_contig_31397	Quail_Scaffolded_DeNovo_contig_18228	875
Quail_Naked_DeNovo_contig_101806	Quail_Scaffolded_DeNovo_contig_18319	36543
Quail_Naked_DeNovo_contig_293993	Quail_Scaffolded_DeNovo_contig_18376	1
Quail_Naked_DeNovo_contig_370656	Quail_Scaffolded_DeNovo_contig_18376	1
Quail_Naked_DeNovo_contig_267373	Quail_Scaffolded_DeNovo_contig_18488	1
Quail_Naked_DeNovo_contig_120100	Quail_Scaffolded_DeNovo_contig_18502	2242
Quail_Naked_DeNovo_contig_90040	Quail_Scaffolded_DeNovo_contig_18548	37639
Quail_Naked_DeNovo_contig_29777	Quail_Scaffolded_DeNovo_contig_18563	1
Quail_Naked_DeNovo_contig_177022	Quail_Scaffolded_DeNovo_contig_18592	12980
Quail_Naked_DeNovo_contig_92181	Quail_Scaffolded_DeNovo_contig_18784	13297
Quail_Naked_DeNovo_contig_51902	Quail_Scaffolded_DeNovo_contig_18806	1808
Quail_Naked_DeNovo_contig_215253	Quail_Scaffolded_DeNovo_contig_18844	2216
Quail_Naked_DeNovo_contig_99196	Quail_Scaffolded_DeNovo_contig_18866	23806
Quail_Naked_DeNovo_contig_169175	Quail_Scaffolded_DeNovo_contig_18898	1
Quail_Naked_DeNovo_contig_166171	Quail_Scaffolded_DeNovo_contig_18990	31
Quail_Naked_DeNovo_contig_19726	Quail_Scaffolded_DeNovo_contig_19060	1
Quail_Naked_DeNovo_contig_17153	Quail_Scaffolded_DeNovo_contig_19104	1
Quail_Naked_DeNovo_contig_302743	Quail_Scaffolded_DeNovo_contig_19134	1
Quail_Naked_DeNovo_contig_221212	Quail_Scaffolded_DeNovo_contig_19144	17
Quail_Naked_DeNovo_contig_273720	Quail_Scaffolded_DeNovo_contig_19158	15630
Quail_Naked_DeNovo_contig_57460	Quail_Scaffolded_DeNovo_contig_19166	8080
Quail_Naked_DeNovo_contig_36160	Quail_Scaffolded_DeNovo_contig_19262	3619
Quail_Naked_DeNovo_contig_97855	Quail_Scaffolded_DeNovo_contig_19304	1
Quail_Naked_DeNovo_contig_187380	Quail_Scaffolded_DeNovo_contig_19304	17
Quail_Naked_DeNovo_contig_28183	Quail_Scaffolded_DeNovo_contig_19307	1
Quail_Naked_DeNovo_contig_106921	Quail_Scaffolded_DeNovo_contig_19324	315
Quail_Naked_DeNovo_contig_104824	Quail_Scaffolded_DeNovo_contig_19385	62288
Quail_Naked_DeNovo_contig_314596	Quail_Scaffolded_DeNovo_contig_19410	226
Quail_Naked_DeNovo_contig_89499	Quail_Scaffolded_DeNovo_contig_19418	26770
Quail_Naked_DeNovo_contig_361738	Quail_Scaffolded_DeNovo_contig_19460	675
Quail_Naked_DeNovo_contig_288402	Quail_Scaffolded_DeNovo_contig_19535	71484
Quail_Naked_DeNovo_contig_243607	Quail_Scaffolded_DeNovo_contig_19601	30727
Quail_Naked_DeNovo_contig_136751	Quail_Scaffolded_DeNovo_contig_19614	1
Quail_Naked_DeNovo_contig_176735	Quail_Scaffolded_DeNovo_contig_19616	6481
Quail_Naked_DeNovo_contig_355425	Quail_Scaffolded_DeNovo_contig_19661	30663
Quail_Naked_DeNovo_contig_37494	Quail_Scaffolded_DeNovo_contig_19695	1
Quail_Naked_DeNovo_contig_43071	Quail_Scaffolded_DeNovo_contig_20062	1
Quail_Naked_DeNovo_contig_106593	Quail_Scaffolded_DeNovo_contig_20123	21272
Quail_Naked_DeNovo_contig_32723	Quail_Scaffolded_DeNovo_contig_20127	1
Quail_Naked_DeNovo_contig_51493	Quail_Scaffolded_DeNovo_contig_20243	1
Quail_Naked_DeNovo_contig_19835	Quail_Scaffolded_DeNovo_contig_20279	1
Quail_Naked_DeNovo_contig_129649	Quail_Scaffolded_DeNovo_contig_20289	51640
Quail_Naked_DeNovo_contig_34785	Quail_Scaffolded_DeNovo_contig_20476	18
Quail_Naked_DeNovo_contig_180270	Quail_Scaffolded_DeNovo_contig_20545	2019
Quail_Naked_DeNovo_contig_185822	Quail_Scaffolded_DeNovo_contig_20575	125959
Quail_Naked_DeNovo_contig_258898	Quail_Scaffolded_DeNovo_contig_20575	125960
Quail_Naked_DeNovo_contig_76439	Quail_Scaffolded_DeNovo_contig_20591	62930
Quail_Naked_DeNovo_contig_254855	Quail_Scaffolded_DeNovo_contig_20631	10793
Quail_Naked_DeNovo_contig_200757	Quail_Scaffolded_DeNovo_contig_20729	592
Quail_Naked_DeNovo_contig_108016	Quail_Scaffolded_DeNovo_contig_20839	193
Quail_Naked_DeNovo_contig_186839	Quail_Scaffolded_DeNovo_contig_20851	4527
Quail_Naked_DeNovo_contig_241202	Quail_Scaffolded_DeNovo_contig_20979	50706
Quail_Naked_DeNovo_contig_352472	Quail_Scaffolded_DeNovo_contig_21035	37885
Quail_Naked_DeNovo_contig_50528	Quail_Scaffolded_DeNovo_contig_21089	47045
Quail_Naked_DeNovo_contig_141765	Quail_Scaffolded_DeNovo_contig_21093	22603
Quail_Naked_DeNovo_contig_259275	Quail_Scaffolded_DeNovo_contig_21097	21417
Quail_Naked_DeNovo_contig_38111	Quail_Scaffolded_DeNovo_contig_21116	1
Quail_Naked_DeNovo_contig_62871	Quail_Scaffolded_DeNovo_contig_21322	29239
Quail_Naked_DeNovo_contig_215033	Quail_Scaffolded_DeNovo_contig_21347	1
Quail_Naked_DeNovo_contig_10639	Quail_Scaffolded_DeNovo_contig_21393	8833
Quail_Naked_DeNovo_contig_63301	Quail_Scaffolded_DeNovo_contig_21403	13799
Quail_Naked_DeNovo_contig_177867	Quail_Scaffolded_DeNovo_contig_21422	39528
Quail_Naked_DeNovo_contig_113284	Quail_Scaffolded_DeNovo_contig_21446	11083
Quail_Naked_DeNovo_contig_208338	Quail_Scaffolded_DeNovo_contig_21520	22159
Quail_Naked_DeNovo_contig_211882	Quail_Scaffolded_DeNovo_contig_21559	1149
Quail_Naked_DeNovo_contig_54633	Quail_Scaffolded_DeNovo_contig_21569	42
Quail_Naked_DeNovo_contig_105378	Quail_Scaffolded_DeNovo_contig_21591	13888
Quail_Naked_DeNovo_contig_334521	Quail_Scaffolded_DeNovo_contig_21592	23255
Quail_Naked_DeNovo_contig_342821	Quail_Scaffolded_DeNovo_contig_21625	7148
Quail_Naked_DeNovo_contig_141089	Quail_Scaffolded_DeNovo_contig_21648	37153
Quail_Naked_DeNovo_contig_265540	Quail_Scaffolded_DeNovo_contig_21715	1554
Quail_Naked_DeNovo_contig_61343	Quail_Scaffolded_DeNovo_contig_21915	1
Quail_Naked_DeNovo_contig_35757	Quail_Scaffolded_DeNovo_contig_22048	1
Quail_Naked_DeNovo_contig_51448	Quail_Scaffolded_DeNovo_contig_22096	1
Quail_Naked_DeNovo_contig_329363	Quail_Scaffolded_DeNovo_contig_22203	4925
Quail_Naked_DeNovo_contig_64643	Quail_Scaffolded_DeNovo_contig_22249	4714
Quail_Naked_DeNovo_contig_71493	Quail_Scaffolded_DeNovo_contig_22314	24872
Quail_Naked_DeNovo_contig_16403	Quail_Scaffolded_DeNovo_contig_22423	124
Quail_Naked_DeNovo_contig_111214	Quail_Scaffolded_DeNovo_contig_22614	6369
Quail_Naked_DeNovo_contig_21397	Quail_Scaffolded_DeNovo_contig_22623	1
Quail_Naked_DeNovo_contig_38035	Quail_Scaffolded_DeNovo_contig_22654	2582
Quail_Naked_DeNovo_contig_253248	Quail_Scaffolded_DeNovo_contig_22756	4396
Quail_Naked_DeNovo_contig_196833	Quail_Scaffolded_DeNovo_contig_22756	4543
Quail_Naked_DeNovo_contig_360361	Quail_Scaffolded_DeNovo_contig_22760	35582
Quail_Naked_DeNovo_contig_64422	Quail_Scaffolded_DeNovo_contig_22768	1
Quail_Naked_DeNovo_contig_156014	Quail_Scaffolded_DeNovo_contig_22801	1
Quail_Naked_DeNovo_contig_141622	Quail_Scaffolded_DeNovo_contig_22823	1
Quail_Naked_DeNovo_contig_200330	Quail_Scaffolded_DeNovo_contig_22854	12785
Quail_Naked_DeNovo_contig_29249	Quail_Scaffolded_DeNovo_contig_22953	417
Quail_Naked_DeNovo_contig_273184	Quail_Scaffolded_DeNovo_contig_22990	447
Quail_Naked_DeNovo_contig_44182	Quail_Scaffolded_DeNovo_contig_23050	1
Quail_Naked_DeNovo_contig_151515	Quail_Scaffolded_DeNovo_contig_23091	145
Quail_Naked_DeNovo_contig_153310	Quail_Scaffolded_DeNovo_contig_23115	13421
Quail_Naked_DeNovo_contig_51930	Quail_Scaffolded_DeNovo_contig_23285	2844
Quail_Naked_DeNovo_contig_39967	Quail_Scaffolded_DeNovo_contig_23308	3326
Quail_Naked_DeNovo_contig_58802	Quail_Scaffolded_DeNovo_contig_23337	43214
Quail_Naked_DeNovo_contig_142571	Quail_Scaffolded_DeNovo_contig_23448	6196
Quail_Naked_DeNovo_contig_369757	Quail_Scaffolded_DeNovo_contig_23453	11762
Quail_Naked_DeNovo_contig_81774	Quail_Scaffolded_DeNovo_contig_23460	3775
Quail_Naked_DeNovo_contig_242488	Quail_Scaffolded_DeNovo_contig_23565	24757
Quail_Naked_DeNovo_contig_151421	Quail_Scaffolded_DeNovo_contig_23600	46046
Quail_Naked_DeNovo_contig_8307	Quail_Scaffolded_DeNovo_contig_23610	552
Quail_Naked_DeNovo_contig_133358	Quail_Scaffolded_DeNovo_contig_23677	1
Quail_Naked_DeNovo_contig_48145	Quail_Scaffolded_DeNovo_contig_23743	1
Quail_Naked_DeNovo_contig_25952	Quail_Scaffolded_DeNovo_contig_23751	2017
Quail_Naked_DeNovo_contig_182858	Quail_Scaffolded_DeNovo_contig_23757	108438
Quail_Naked_DeNovo_contig_126777	Quail_Scaffolded_DeNovo_contig_23780	476
Quail_Naked_DeNovo_contig_206914	Quail_Scaffolded_DeNovo_contig_23780	543
Quail_Naked_DeNovo_contig_38533	Quail_Scaffolded_DeNovo_contig_23841	1
Quail_Naked_DeNovo_contig_5453	Quail_Scaffolded_DeNovo_contig_23885	9149
Quail_Naked_DeNovo_contig_137914	Quail_Scaffolded_DeNovo_contig_24015	46649
Quail_Naked_DeNovo_contig_67858	Quail_Scaffolded_DeNovo_contig_24022	12770
Quail_Naked_DeNovo_contig_31230	Quail_Scaffolded_DeNovo_contig_24068	1
Quail_Naked_DeNovo_contig_41521	Quail_Scaffolded_DeNovo_contig_24198	1656
Quail_Naked_DeNovo_contig_141996	Quail_Scaffolded_DeNovo_contig_24236	32339
Quail_Naked_DeNovo_contig_48523	Quail_Scaffolded_DeNovo_contig_24260	1
Quail_Naked_DeNovo_contig_41849	Quail_Scaffolded_DeNovo_contig_24358	1
Quail_Naked_DeNovo_contig_90843	Quail_Scaffolded_DeNovo_contig_24386	1
Quail_Naked_DeNovo_contig_279685	Quail_Scaffolded_DeNovo_contig_24403	13103
Quail_Naked_DeNovo_contig_98964	Quail_Scaffolded_DeNovo_contig_24569	1747
Quail_Naked_DeNovo_contig_254699	Quail_Scaffolded_DeNovo_contig_24569	2154
Quail_Naked_DeNovo_contig_110308	Quail_Scaffolded_DeNovo_contig_24601	925
Quail_Naked_DeNovo_contig_40931	Quail_Scaffolded_DeNovo_contig_24601	1278
Quail_Naked_DeNovo_contig_370719	Quail_Scaffolded_DeNovo_contig_24626	1
Quail_Naked_DeNovo_contig_58259	Quail_Scaffolded_DeNovo_contig_24632	1
Quail_Naked_DeNovo_contig_167480	Quail_Scaffolded_DeNovo_contig_24672	4836
Quail_Naked_DeNovo_contig_61440	Quail_Scaffolded_DeNovo_contig_24674	824
Quail_Naked_DeNovo_contig_304943	Quail_Scaffolded_DeNovo_contig_24679	457
Quail_Naked_DeNovo_contig_40242	Quail_Scaffolded_DeNovo_contig_24731	1
Quail_Naked_DeNovo_contig_46160	Quail_Scaffolded_DeNovo_contig_24959	141
Quail_Naked_DeNovo_contig_72550	Quail_Scaffolded_DeNovo_contig_25041	820
Quail_Naked_DeNovo_contig_336625	Quail_Scaffolded_DeNovo_contig_25118	12364
Quail_Naked_DeNovo_contig_341457	Quail_Scaffolded_DeNovo_contig_25170	22124
Quail_Naked_DeNovo_contig_54961	Quail_Scaffolded_DeNovo_contig_25178	753
Quail_Naked_DeNovo_contig_37436	Quail_Scaffolded_DeNovo_contig_25206	23869
Quail_Naked_DeNovo_contig_336129	Quail_Scaffolded_DeNovo_contig_25346	17224
Quail_Naked_DeNovo_contig_35683	Quail_Scaffolded_DeNovo_contig_25408	8305
Quail_Naked_DeNovo_contig_236137	Quail_Scaffolded_DeNovo_contig_25474	68711
Quail_Naked_DeNovo_contig_50467	Quail_Scaffolded_DeNovo_contig_25486	1840
Quail_Naked_DeNovo_contig_77035	Quail_Scaffolded_DeNovo_contig_25489	15149
Quail_Naked_DeNovo_contig_136078	Quail_Scaffolded_DeNovo_contig_25489	15149
Quail_Naked_DeNovo_contig_44879	Quail_Scaffolded_DeNovo_contig_25528	2
Quail_Naked_DeNovo_contig_129563	Quail_Scaffolded_DeNovo_contig_25553	370
Quail_Naked_DeNovo_contig_42319	Quail_Scaffolded_DeNovo_contig_25591	1
Quail_Naked_DeNovo_contig_73443	Quail_Scaffolded_DeNovo_contig_25673	41352
Quail_Naked_DeNovo_contig_81887	Quail_Scaffolded_DeNovo_contig_25685	3766
Quail_Naked_DeNovo_contig_62355	Quail_Scaffolded_DeNovo_contig_25732	20373
Quail_Naked_DeNovo_contig_130725	Quail_Scaffolded_DeNovo_contig_25906	1259
Quail_Naked_DeNovo_contig_57362	Quail_Scaffolded_DeNovo_contig_25914	1
Quail_Naked_DeNovo_contig_262281	Quail_Scaffolded_DeNovo_contig_25919	99422
Quail_Naked_DeNovo_contig_122281	Quail_Scaffolded_DeNovo_contig_26031	93424
Quail_Naked_DeNovo_contig_294858	Quail_Scaffolded_DeNovo_contig_26103	24
Quail_Naked_DeNovo_contig_302131	Quail_Scaffolded_DeNovo_contig_26103	46
Quail_Naked_DeNovo_contig_56649	Quail_Scaffolded_DeNovo_contig_26263	1
Quail_Naked_DeNovo_contig_165884	Quail_Scaffolded_DeNovo_contig_26295	1
Quail_Naked_DeNovo_contig_49620	Quail_Scaffolded_DeNovo_contig_26331	1
Quail_Naked_DeNovo_contig_49397	Quail_Scaffolded_DeNovo_contig_26362	1
Quail_Naked_DeNovo_contig_166414	Quail_Scaffolded_DeNovo_contig_26426	15943
Quail_Naked_DeNovo_contig_59336	Quail_Scaffolded_DeNovo_contig_26436	1
Quail_Naked_DeNovo_contig_150013	Quail_Scaffolded_DeNovo_contig_26517	15409
Quail_Naked_DeNovo_contig_197555	Quail_Scaffolded_DeNovo_contig_26525	1
Quail_Naked_DeNovo_contig_203855	Quail_Scaffolded_DeNovo_contig_26525	1584
Quail_Naked_DeNovo_contig_261019	Quail_Scaffolded_DeNovo_contig_26541	105
Quail_Naked_DeNovo_contig_66555	Quail_Scaffolded_DeNovo_contig_26614	33
Quail_Naked_DeNovo_contig_124197	Quail_Scaffolded_DeNovo_contig_26652	1474
Quail_Naked_DeNovo_contig_120838	Quail_Scaffolded_DeNovo_contig_26711	62094
Quail_Naked_DeNovo_contig_58472	Quail_Scaffolded_DeNovo_contig_26711	64956
Quail_Naked_DeNovo_contig_172364	Quail_Scaffolded_DeNovo_contig_26837	282
Quail_Naked_DeNovo_contig_77751	Quail_Scaffolded_DeNovo_contig_26947	357
Quail_Naked_DeNovo_contig_215087	Quail_Scaffolded_DeNovo_contig_26975	126
Quail_Naked_DeNovo_contig_356692	Quail_Scaffolded_DeNovo_contig_27025	21813
Quail_Naked_DeNovo_contig_57043	Quail_Scaffolded_DeNovo_contig_27117	1
Quail_Naked_DeNovo_contig_125603	Quail_Scaffolded_DeNovo_contig_27333	1
Quail_Naked_DeNovo_contig_303414	Quail_Scaffolded_DeNovo_contig_27553	12426
Quail_Naked_DeNovo_contig_63396	Quail_Scaffolded_DeNovo_contig_27638	1
Quail_Naked_DeNovo_contig_7555	Quail_Scaffolded_DeNovo_contig_27695	198
Quail_Naked_DeNovo_contig_34811	Quail_Scaffolded_DeNovo_contig_27712	370
Quail_Naked_DeNovo_contig_41943	Quail_Scaffolded_DeNovo_contig_27727	1
Quail_Naked_DeNovo_contig_296143	Quail_Scaffolded_DeNovo_contig_27728	35940
Quail_Naked_DeNovo_contig_127183	Quail_Scaffolded_DeNovo_contig_27767	37142
Quail_Naked_DeNovo_contig_199104	Quail_Scaffolded_DeNovo_contig_27804	5535
Quail_Naked_DeNovo_contig_128254	Quail_Scaffolded_DeNovo_contig_27820	586
Quail_Naked_DeNovo_contig_2706	Quail_Scaffolded_DeNovo_contig_27822	479
Quail_Naked_DeNovo_contig_241910	Quail_Scaffolded_DeNovo_contig_27965	727
Quail_Naked_DeNovo_contig_111728	Quail_Scaffolded_DeNovo_contig_28084	5823
Quail_Naked_DeNovo_contig_230361	Quail_Scaffolded_DeNovo_contig_28088	10932
Quail_Naked_DeNovo_contig_29323	Quail_Scaffolded_DeNovo_contig_28297	1
Quail_Naked_DeNovo_contig_58511	Quail_Scaffolded_DeNovo_contig_28432	90321
Quail_Naked_DeNovo_contig_60632	Quail_Scaffolded_DeNovo_contig_28520	1
Quail_Naked_DeNovo_contig_270486	Quail_Scaffolded_DeNovo_contig_28623	1124
Quail_Naked_DeNovo_contig_59860	Quail_Scaffolded_DeNovo_contig_28652	2613
Quail_Naked_DeNovo_contig_302128	Quail_Scaffolded_DeNovo_contig_28721	30548
Quail_Naked_DeNovo_contig_271211	Quail_Scaffolded_DeNovo_contig_28728	2022
Quail_Naked_DeNovo_contig_22978	Quail_Scaffolded_DeNovo_contig_28776	1
Quail_Naked_DeNovo_contig_155405	Quail_Scaffolded_DeNovo_contig_28857	8539
Quail_Naked_DeNovo_contig_70776	Quail_Scaffolded_DeNovo_contig_28918	1
Quail_Naked_DeNovo_contig_37211	Quail_Scaffolded_DeNovo_contig_28953	413
Quail_Naked_DeNovo_contig_144839	Quail_Scaffolded_DeNovo_contig_29129	445
Quail_Naked_DeNovo_contig_100563	Quail_Scaffolded_DeNovo_contig_29196	13
Quail_Naked_DeNovo_contig_93485	Quail_Scaffolded_DeNovo_contig_29290	43276
Quail_Naked_DeNovo_contig_200174	Quail_Scaffolded_DeNovo_contig_29297	1
Quail_Naked_DeNovo_contig_358017	Quail_Scaffolded_DeNovo_contig_29306	25653
Quail_Naked_DeNovo_contig_184466	Quail_Scaffolded_DeNovo_contig_29358	1185
Quail_Naked_DeNovo_contig_84387	Quail_Scaffolded_DeNovo_contig_29367	1
Quail_Naked_DeNovo_contig_67978	Quail_Scaffolded_DeNovo_contig_29452	1
Quail_Naked_DeNovo_contig_3352	Quail_Scaffolded_DeNovo_contig_29464	42552
Quail_Naked_DeNovo_contig_13812	Quail_Scaffolded_DeNovo_contig_29473	2684
Quail_Naked_DeNovo_contig_203958	Quail_Scaffolded_DeNovo_contig_29479	59148
Quail_Naked_DeNovo_contig_298185	Quail_Scaffolded_DeNovo_contig_29656	30
Quail_Naked_DeNovo_contig_190168	Quail_Scaffolded_DeNovo_contig_29826	757
Quail_Naked_DeNovo_contig_184185	Quail_Scaffolded_DeNovo_contig_29989	36189
Quail_Naked_DeNovo_contig_49998	Quail_Scaffolded_DeNovo_contig_30085	1
Quail_Naked_DeNovo_contig_309491	Quail_Scaffolded_DeNovo_contig_30095	57000
Quail_Naked_DeNovo_contig_70525	Quail_Scaffolded_DeNovo_contig_30383	1
Quail_Naked_DeNovo_contig_21161	Quail_Scaffolded_DeNovo_contig_30659	1
Quail_Naked_DeNovo_contig_64307	Quail_Scaffolded_DeNovo_contig_30764	365
Quail_Naked_DeNovo_contig_18344	Quail_Scaffolded_DeNovo_contig_30880	411
Quail_Naked_DeNovo_contig_327714	Quail_Scaffolded_DeNovo_contig_30934	7079
Quail_Naked_DeNovo_contig_100279	Quail_Scaffolded_DeNovo_contig_31063	29754
Quail_Naked_DeNovo_contig_262898	Quail_Scaffolded_DeNovo_contig_31287	1846
Quail_Naked_DeNovo_contig_51067	Quail_Scaffolded_DeNovo_contig_31516	1
Quail_Naked_DeNovo_contig_213437	Quail_Scaffolded_DeNovo_contig_31521	22042
Quail_Naked_DeNovo_contig_250095	Quail_Scaffolded_DeNovo_contig_31625	526
Quail_Naked_DeNovo_contig_75848	Quail_Scaffolded_DeNovo_contig_31700	1
Quail_Naked_DeNovo_contig_202326	Quail_Scaffolded_DeNovo_contig_31763	41393
Quail_Naked_DeNovo_contig_194878	Quail_Scaffolded_DeNovo_contig_31877	6000
Quail_Naked_DeNovo_contig_336785	Quail_Scaffolded_DeNovo_contig_31886	6314
Quail_Naked_DeNovo_contig_151831	Quail_Scaffolded_DeNovo_contig_31909	1
Quail_Naked_DeNovo_contig_281673	Quail_Scaffolded_DeNovo_contig_31910	2035
Quail_Naked_DeNovo_contig_120445	Quail_Scaffolded_DeNovo_contig_31929	1
Quail_Naked_DeNovo_contig_120009	Quail_Scaffolded_DeNovo_contig_32102	8285
Quail_Naked_DeNovo_contig_86830	Quail_Scaffolded_DeNovo_contig_32109	292
Quail_Naked_DeNovo_contig_26514	Quail_Scaffolded_DeNovo_contig_32132	1
Quail_Naked_DeNovo_contig_187151	Quail_Scaffolded_DeNovo_contig_32139	1
Quail_Naked_DeNovo_contig_86498	Quail_Scaffolded_DeNovo_contig_32157	119
Quail_Naked_DeNovo_contig_154964	Quail_Scaffolded_DeNovo_contig_32182	6947
Quail_Naked_DeNovo_contig_297382	Quail_Scaffolded_DeNovo_contig_32256	25589
Quail_Naked_DeNovo_contig_172753	Quail_Scaffolded_DeNovo_contig_32312	40544
Quail_Naked_DeNovo_contig_259611	Quail_Scaffolded_DeNovo_contig_32348	17098
Quail_Naked_DeNovo_contig_46143	Quail_Scaffolded_DeNovo_contig_32388	1
Quail_Naked_DeNovo_contig_85175	Quail_Scaffolded_DeNovo_contig_32419	1
Quail_Naked_DeNovo_contig_80941	Quail_Scaffolded_DeNovo_contig_32456	3012
Quail_Naked_DeNovo_contig_17740	Quail_Scaffolded_DeNovo_contig_32498	1191
Quail_Naked_DeNovo_contig_188970	Quail_Scaffolded_DeNovo_contig_32515	4307
Quail_Naked_DeNovo_contig_70567	Quail_Scaffolded_DeNovo_contig_32517	1
Quail_Naked_DeNovo_contig_161292	Quail_Scaffolded_DeNovo_contig_32543	1
Quail_Naked_DeNovo_contig_76281	Quail_Scaffolded_DeNovo_contig_32556	1
Quail_Naked_DeNovo_contig_95486	Quail_Scaffolded_DeNovo_contig_32703	280
Quail_Naked_DeNovo_contig_37145	Quail_Scaffolded_DeNovo_contig_32796	1
Quail_Naked_DeNovo_contig_149764	Quail_Scaffolded_DeNovo_contig_32798	19626
Quail_Naked_DeNovo_contig_220368	Quail_Scaffolded_DeNovo_contig_32798	19652
Quail_Naked_DeNovo_contig_139238	Quail_Scaffolded_DeNovo_contig_32806	5860
Quail_Naked_DeNovo_contig_194002	Quail_Scaffolded_DeNovo_contig_32836	18099
Quail_Naked_DeNovo_contig_104692	Quail_Scaffolded_DeNovo_contig_32837	33163
Quail_Naked_DeNovo_contig_271651	Quail_Scaffolded_DeNovo_contig_32851	35536
Quail_Naked_DeNovo_contig_69028	Quail_Scaffolded_DeNovo_contig_32881	1
Quail_Naked_DeNovo_contig_284381	Quail_Scaffolded_DeNovo_contig_32913	1
Quail_Naked_DeNovo_contig_291747	Quail_Scaffolded_DeNovo_contig_33161	3822
Quail_Naked_DeNovo_contig_216955	Quail_Scaffolded_DeNovo_contig_33244	1
Quail_Naked_DeNovo_contig_47084	Quail_Scaffolded_DeNovo_contig_33257	1
Quail_Naked_DeNovo_contig_79398	Quail_Scaffolded_DeNovo_contig_33274	1
Quail_Naked_DeNovo_contig_288475	Quail_Scaffolded_DeNovo_contig_33485	25
Quail_Naked_DeNovo_contig_210689	Quail_Scaffolded_DeNovo_contig_33521	7124
Quail_Naked_DeNovo_contig_109335	Quail_Scaffolded_DeNovo_contig_33526	452
Quail_Naked_DeNovo_contig_81412	Quail_Scaffolded_DeNovo_contig_33559	1
Quail_Naked_DeNovo_contig_47677	Quail_Scaffolded_DeNovo_contig_33608	65258
Quail_Naked_DeNovo_contig_70556	Quail_Scaffolded_DeNovo_contig_33661	1
Quail_Naked_DeNovo_contig_33203	Quail_Scaffolded_DeNovo_contig_33708	644
Quail_Naked_DeNovo_contig_166341	Quail_Scaffolded_DeNovo_contig_33716	202
Quail_Naked_DeNovo_contig_66236	Quail_Scaffolded_DeNovo_contig_33860	1
Quail_Naked_DeNovo_contig_253194	Quail_Scaffolded_DeNovo_contig_33871	4042
Quail_Naked_DeNovo_contig_65002	Quail_Scaffolded_DeNovo_contig_33895	1
Quail_Naked_DeNovo_contig_319955	Quail_Scaffolded_DeNovo_contig_34006	99
Quail_Naked_DeNovo_contig_28499	Quail_Scaffolded_DeNovo_contig_34058	286
Quail_Naked_DeNovo_contig_20170	Quail_Scaffolded_DeNovo_contig_34093	1
Quail_Naked_DeNovo_contig_172036	Quail_Scaffolded_DeNovo_contig_34158	592
Quail_Naked_DeNovo_contig_77122	Quail_Scaffolded_DeNovo_contig_34279	1
Quail_Naked_DeNovo_contig_158178	Quail_Scaffolded_DeNovo_contig_34442	1
Quail_Naked_DeNovo_contig_54969	Quail_Scaffolded_DeNovo_contig_34488	47482
Quail_Naked_DeNovo_contig_80983	Quail_Scaffolded_DeNovo_contig_34504	8713
Quail_Naked_DeNovo_contig_275908	Quail_Scaffolded_DeNovo_contig_34548	308
Quail_Naked_DeNovo_contig_50390	Quail_Scaffolded_DeNovo_contig_34566	1
Quail_Naked_DeNovo_contig_67589	Quail_Scaffolded_DeNovo_contig_34596	1
Quail_Naked_DeNovo_contig_26929	Quail_Scaffolded_DeNovo_contig_34600	196
Quail_Naked_DeNovo_contig_70391	Quail_Scaffolded_DeNovo_contig_34721	1
Quail_Naked_DeNovo_contig_278813	Quail_Scaffolded_DeNovo_contig_34975	9885
Quail_Naked_DeNovo_contig_128255	Quail_Scaffolded_DeNovo_contig_34980	1
Quail_Naked_DeNovo_contig_18113	Quail_Scaffolded_DeNovo_contig_34984	1
Quail_Naked_DeNovo_contig_126918	Quail_Scaffolded_DeNovo_contig_35003	705
Quail_Naked_DeNovo_contig_98122	Quail_Scaffolded_DeNovo_contig_35040	1
Quail_Naked_DeNovo_contig_47923	Quail_Scaffolded_DeNovo_contig_35098	1
Quail_Naked_DeNovo_contig_315016	Quail_Scaffolded_DeNovo_contig_35168	9300
Quail_Naked_DeNovo_contig_294459	Quail_Scaffolded_DeNovo_contig_35168	9320
Quail_Naked_DeNovo_contig_230114	Quail_Scaffolded_DeNovo_contig_35213	25535
Quail_Naked_DeNovo_contig_204776	Quail_Scaffolded_DeNovo_contig_35294	114
Quail_Naked_DeNovo_contig_188895	Quail_Scaffolded_DeNovo_contig_35380	1
Quail_Naked_DeNovo_contig_89133	Quail_Scaffolded_DeNovo_contig_35399	1
Quail_Naked_DeNovo_contig_342031	Quail_Scaffolded_DeNovo_contig_35533	561
Quail_Naked_DeNovo_contig_15240	Quail_Scaffolded_DeNovo_contig_35540	2512
Quail_Naked_DeNovo_contig_314830	Quail_Scaffolded_DeNovo_contig_35730	9139
Quail_Naked_DeNovo_contig_183984	Quail_Scaffolded_DeNovo_contig_36083	1
Quail_Naked_DeNovo_contig_45799	Quail_Scaffolded_DeNovo_contig_36335	19734
Quail_Naked_DeNovo_contig_72918	Quail_Scaffolded_DeNovo_contig_36359	1
Quail_Naked_DeNovo_contig_218497	Quail_Scaffolded_DeNovo_contig_36366	204
Quail_Naked_DeNovo_contig_93717	Quail_Scaffolded_DeNovo_contig_36390	1
Quail_Naked_DeNovo_contig_13489	Quail_Scaffolded_DeNovo_contig_36446	23528
Quail_Naked_DeNovo_contig_52898	Quail_Scaffolded_DeNovo_contig_36556	1
Quail_Naked_DeNovo_contig_137567	Quail_Scaffolded_DeNovo_contig_36631	178
Quail_Naked_DeNovo_contig_229521	Quail_Scaffolded_DeNovo_contig_36705	2036
Quail_Naked_DeNovo_contig_63343	Quail_Scaffolded_DeNovo_contig_36714	137
Quail_Naked_DeNovo_contig_46728	Quail_Scaffolded_DeNovo_contig_36738	1
Quail_Naked_DeNovo_contig_46429	Quail_Scaffolded_DeNovo_contig_36738	8481
Quail_Naked_DeNovo_contig_77900	Quail_Scaffolded_DeNovo_contig_36740	121
Quail_Naked_DeNovo_contig_131859	Quail_Scaffolded_DeNovo_contig_36871	12085
Quail_Naked_DeNovo_contig_96681	Quail_Scaffolded_DeNovo_contig_37050	1132
Quail_Naked_DeNovo_contig_26647	Quail_Scaffolded_DeNovo_contig_37062	1
Quail_Naked_DeNovo_contig_64342	Quail_Scaffolded_DeNovo_contig_37175	50
Quail_Naked_DeNovo_contig_223351	Quail_Scaffolded_DeNovo_contig_37190	26368
Quail_Naked_DeNovo_contig_367567	Quail_Scaffolded_DeNovo_contig_37190	26368
Quail_Naked_DeNovo_contig_95431	Quail_Scaffolded_DeNovo_contig_37192	11245
Quail_Naked_DeNovo_contig_193417	Quail_Scaffolded_DeNovo_contig_37488	2171
Quail_Naked_DeNovo_contig_230736	Quail_Scaffolded_DeNovo_contig_37493	7385
Quail_Naked_DeNovo_contig_85947	Quail_Scaffolded_DeNovo_contig_37520	7
Quail_Naked_DeNovo_contig_273668	Quail_Scaffolded_DeNovo_contig_37523	31439
Quail_Naked_DeNovo_contig_328561	Quail_Scaffolded_DeNovo_contig_37523	31439
Quail_Naked_DeNovo_contig_138072	Quail_Scaffolded_DeNovo_contig_37830	11866
Quail_Naked_DeNovo_contig_192516	Quail_Scaffolded_DeNovo_contig_37920	2908
Quail_Naked_DeNovo_contig_311236	Quail_Scaffolded_DeNovo_contig_37937	1
Quail_Naked_DeNovo_contig_83344	Quail_Scaffolded_DeNovo_contig_37973	1
Quail_Naked_DeNovo_contig_115055	Quail_Scaffolded_DeNovo_contig_38008	1
Quail_Naked_DeNovo_contig_291739	Quail_Scaffolded_DeNovo_contig_38039	31693
Quail_Naked_DeNovo_contig_208113	Quail_Scaffolded_DeNovo_contig_38113	563
Quail_Naked_DeNovo_contig_278787	Quail_Scaffolded_DeNovo_contig_38308	1
Quail_Naked_DeNovo_contig_271687	Quail_Scaffolded_DeNovo_contig_38321	22757
Quail_Naked_DeNovo_contig_68853	Quail_Scaffolded_DeNovo_contig_38331	1651
Quail_Naked_DeNovo_contig_232142	Quail_Scaffolded_DeNovo_contig_38469	5429
Quail_Naked_DeNovo_contig_92506	Quail_Scaffolded_DeNovo_contig_38486	1
Quail_Naked_DeNovo_contig_23066	Quail_Scaffolded_DeNovo_contig_38545	35101
Quail_Naked_DeNovo_contig_342953	Quail_Scaffolded_DeNovo_contig_38740	6843
Quail_Naked_DeNovo_contig_7969	Quail_Scaffolded_DeNovo_contig_38948	1
Quail_Naked_DeNovo_contig_141555	Quail_Scaffolded_DeNovo_contig_39092	1
Quail_Naked_DeNovo_contig_15413	Quail_Scaffolded_DeNovo_contig_39422	83
Quail_Naked_DeNovo_contig_297057	Quail_Scaffolded_DeNovo_contig_39434	15292
Quail_Naked_DeNovo_contig_279370	Quail_Scaffolded_DeNovo_contig_39606	574
Quail_Naked_DeNovo_contig_67329	Quail_Scaffolded_DeNovo_contig_39754	1
Quail_Naked_DeNovo_contig_242524	Quail_Scaffolded_DeNovo_contig_39796	2
Quail_Naked_DeNovo_contig_66221	Quail_Scaffolded_DeNovo_contig_39851	1
Quail_Naked_DeNovo_contig_39317	Quail_Scaffolded_DeNovo_contig_40029	1
Quail_Naked_DeNovo_contig_191258	Quail_Scaffolded_DeNovo_contig_40239	850
Quail_Naked_DeNovo_contig_91017	Quail_Scaffolded_DeNovo_contig_40281	1
Quail_Naked_DeNovo_contig_328558	Quail_Scaffolded_DeNovo_contig_40422	93
Quail_Naked_DeNovo_contig_60019	Quail_Scaffolded_DeNovo_contig_40422	186
Quail_Naked_DeNovo_contig_84698	Quail_Scaffolded_DeNovo_contig_40499	1
Quail_Naked_DeNovo_contig_112975	Quail_Scaffolded_DeNovo_contig_40610	67
Quail_Naked_DeNovo_contig_116100	Quail_Scaffolded_DeNovo_contig_40624	1
Quail_Naked_DeNovo_contig_168792	Quail_Scaffolded_DeNovo_contig_40641	5428
Quail_Naked_DeNovo_contig_86530	Quail_Scaffolded_DeNovo_contig_40774	4255
Quail_Naked_DeNovo_contig_166868	Quail_Scaffolded_DeNovo_contig_40892	144
Quail_Naked_DeNovo_contig_262603	Quail_Scaffolded_DeNovo_contig_40896	5
Quail_Naked_DeNovo_contig_67954	Quail_Scaffolded_DeNovo_contig_41000	131
Quail_Naked_DeNovo_contig_140694	Quail_Scaffolded_DeNovo_contig_41204	375
Quail_Naked_DeNovo_contig_202530	Quail_Scaffolded_DeNovo_contig_41646	1
Quail_Naked_DeNovo_contig_78870	Quail_Scaffolded_DeNovo_contig_41739	1
Quail_Naked_DeNovo_contig_121349	Quail_Scaffolded_DeNovo_contig_41752	1
Quail_Naked_DeNovo_contig_140190	Quail_Scaffolded_DeNovo_contig_41758	1
Quail_Naked_DeNovo_contig_292092	Quail_Scaffolded_DeNovo_contig_41800	271
Quail_Naked_DeNovo_contig_101756	Quail_Scaffolded_DeNovo_contig_41945	1
Quail_Naked_DeNovo_contig_66212	Quail_Scaffolded_DeNovo_contig_41958	20126
Quail_Naked_DeNovo_contig_66702	Quail_Scaffolded_DeNovo_contig_41995	1
Quail_Naked_DeNovo_contig_34127	Quail_Scaffolded_DeNovo_contig_42149	343
Quail_Naked_DeNovo_contig_28184	Quail_Scaffolded_DeNovo_contig_42176	7460
Quail_Naked_DeNovo_contig_84105	Quail_Scaffolded_DeNovo_contig_42323	1
Quail_Naked_DeNovo_contig_88924	Quail_Scaffolded_DeNovo_contig_42592	1
Quail_Naked_DeNovo_contig_68439	Quail_Scaffolded_DeNovo_contig_42605	363
Quail_Naked_DeNovo_contig_83188	Quail_Scaffolded_DeNovo_contig_42605	363
Quail_Naked_DeNovo_contig_147732	Quail_Scaffolded_DeNovo_contig_42631	66
Quail_Naked_DeNovo_contig_167383	Quail_Scaffolded_DeNovo_contig_43068	4859
Quail_Naked_DeNovo_contig_38902	Quail_Scaffolded_DeNovo_contig_43327	2328
Quail_Naked_DeNovo_contig_104964	Quail_Scaffolded_DeNovo_contig_43330	1
Quail_Naked_DeNovo_contig_212167	Quail_Scaffolded_DeNovo_contig_43509	855
Quail_Naked_DeNovo_contig_263172	Quail_Scaffolded_DeNovo_contig_43561	55
Quail_Naked_DeNovo_contig_129146	Quail_Scaffolded_DeNovo_contig_43735	817
Quail_Naked_DeNovo_contig_304753	Quail_Scaffolded_DeNovo_contig_43968	17327
Quail_Naked_DeNovo_contig_80491	Quail_Scaffolded_DeNovo_contig_44052	7423
Quail_Naked_DeNovo_contig_115546	Quail_Scaffolded_DeNovo_contig_44231	1
Quail_Naked_DeNovo_contig_47467	Quail_Scaffolded_DeNovo_contig_44296	1
Quail_Naked_DeNovo_contig_310741	Quail_Scaffolded_DeNovo_contig_44527	191
Quail_Naked_DeNovo_contig_137968	Quail_Scaffolded_DeNovo_contig_44672	1
Quail_Naked_DeNovo_contig_94681	Quail_Scaffolded_DeNovo_contig_44844	1
Quail_Naked_DeNovo_contig_313673	Quail_Scaffolded_DeNovo_contig_44887	278
Quail_Naked_DeNovo_contig_125164	Quail_Scaffolded_DeNovo_contig_45002	1
Quail_Naked_DeNovo_contig_123430	Quail_Scaffolded_DeNovo_contig_45089	1
Quail_Naked_DeNovo_contig_90000	Quail_Scaffolded_DeNovo_contig_45089	2527
Quail_Naked_DeNovo_contig_102375	Quail_Scaffolded_DeNovo_contig_45098	1
Quail_Naked_DeNovo_contig_68607	Quail_Scaffolded_DeNovo_contig_45145	45
Quail_Naked_DeNovo_contig_168691	Quail_Scaffolded_DeNovo_contig_45324	565
Quail_Naked_DeNovo_contig_79009	Quail_Scaffolded_DeNovo_contig_45332	1
Quail_Naked_DeNovo_contig_148849	Quail_Scaffolded_DeNovo_contig_45361	43
Quail_Naked_DeNovo_contig_232575	Quail_Scaffolded_DeNovo_contig_45445	18578
Quail_Naked_DeNovo_contig_19543	Quail_Scaffolded_DeNovo_contig_45591	1
Quail_Naked_DeNovo_contig_170503	Quail_Scaffolded_DeNovo_contig_45719	10765
Quail_Naked_DeNovo_contig_113279	Quail_Scaffolded_DeNovo_contig_45765	1
Quail_Naked_DeNovo_contig_84159	Quail_Scaffolded_DeNovo_contig_45815	2392
Quail_Naked_DeNovo_contig_69356	Quail_Scaffolded_DeNovo_contig_45897	1
Quail_Naked_DeNovo_contig_248732	Quail_Scaffolded_DeNovo_contig_46090	49
Quail_Naked_DeNovo_contig_44629	Quail_Scaffolded_DeNovo_contig_46134	1
Quail_Naked_DeNovo_contig_114350	Quail_Scaffolded_DeNovo_contig_46147	1
Quail_Naked_DeNovo_contig_243053	Quail_Scaffolded_DeNovo_contig_46168	451
Quail_Naked_DeNovo_contig_120884	Quail_Scaffolded_DeNovo_contig_46286	1
Quail_Naked_DeNovo_contig_214097	Quail_Scaffolded_DeNovo_contig_46287	2386
Quail_Naked_DeNovo_contig_60679	Quail_Scaffolded_DeNovo_contig_46489	1
Quail_Naked_DeNovo_contig_73152	Quail_Scaffolded_DeNovo_contig_46589	1
Quail_Naked_DeNovo_contig_265564	Quail_Scaffolded_DeNovo_contig_46663	2253
Quail_Naked_DeNovo_contig_105665	Quail_Scaffolded_DeNovo_contig_46850	1
Quail_Naked_DeNovo_contig_185711	Quail_Scaffolded_DeNovo_contig_46881	4824
Quail_Naked_DeNovo_contig_334941	Quail_Scaffolded_DeNovo_contig_47017	1
Quail_Naked_DeNovo_contig_61971	Quail_Scaffolded_DeNovo_contig_47031	1
Quail_Naked_DeNovo_contig_81940	Quail_Scaffolded_DeNovo_contig_47102	1
Quail_Naked_DeNovo_contig_177123	Quail_Scaffolded_DeNovo_contig_47138	1348
Quail_Naked_DeNovo_contig_121355	Quail_Scaffolded_DeNovo_contig_47160	1
Quail_Naked_DeNovo_contig_18075	Quail_Scaffolded_DeNovo_contig_47209	1
Quail_Naked_DeNovo_contig_59657	Quail_Scaffolded_DeNovo_contig_47220	632
Quail_Naked_DeNovo_contig_114076	Quail_Scaffolded_DeNovo_contig_47284	1
Quail_Naked_DeNovo_contig_148932	Quail_Scaffolded_DeNovo_contig_47380	26305
Quail_Naked_DeNovo_contig_123416	Quail_Scaffolded_DeNovo_contig_47423	2907
Quail_Naked_DeNovo_contig_83209	Quail_Scaffolded_DeNovo_contig_47516	73
Quail_Naked_DeNovo_contig_134766	Quail_Scaffolded_DeNovo_contig_47732	1
Quail_Naked_DeNovo_contig_243010	Quail_Scaffolded_DeNovo_contig_47792	234
Quail_Naked_DeNovo_contig_16406	Quail_Scaffolded_DeNovo_contig_47933	1
Quail_Naked_DeNovo_contig_222578	Quail_Scaffolded_DeNovo_contig_47963	1
Quail_Naked_DeNovo_contig_36052	Quail_Scaffolded_DeNovo_contig_48023	1
Quail_Naked_DeNovo_contig_65493	Quail_Scaffolded_DeNovo_contig_48125	1
Quail_Naked_DeNovo_contig_189888	Quail_Scaffolded_DeNovo_contig_48164	2670
Quail_Naked_DeNovo_contig_7537	Quail_Scaffolded_DeNovo_contig_48256	1
Quail_Naked_DeNovo_contig_6565	Quail_Scaffolded_DeNovo_contig_48303	45
Quail_Naked_DeNovo_contig_79966	Quail_Scaffolded_DeNovo_contig_48375	764
Quail_Naked_DeNovo_contig_33613	Quail_Scaffolded_DeNovo_contig_48444	72
Quail_Naked_DeNovo_contig_228776	Quail_Scaffolded_DeNovo_contig_48647	5210
Quail_Naked_DeNovo_contig_352912	Quail_Scaffolded_DeNovo_contig_48772	1
Quail_Naked_DeNovo_contig_195955	Quail_Scaffolded_DeNovo_contig_49010	3376
Quail_Naked_DeNovo_contig_282071	Quail_Scaffolded_DeNovo_contig_49010	3376
Quail_Naked_DeNovo_contig_169937	Quail_Scaffolded_DeNovo_contig_49152	2477
Quail_Naked_DeNovo_contig_63212	Quail_Scaffolded_DeNovo_contig_49152	4863
Quail_Naked_DeNovo_contig_175657	Quail_Scaffolded_DeNovo_contig_49240	4689
Quail_Naked_DeNovo_contig_41495	Quail_Scaffolded_DeNovo_contig_49336	489
Quail_Naked_DeNovo_contig_305479	Quail_Scaffolded_DeNovo_contig_49366	5290
Quail_Naked_DeNovo_contig_245275	Quail_Scaffolded_DeNovo_contig_49392	754
Quail_Naked_DeNovo_contig_173605	Quail_Scaffolded_DeNovo_contig_49420	1
Quail_Naked_DeNovo_contig_2291	Quail_Scaffolded_DeNovo_contig_49544	1
Quail_Naked_DeNovo_contig_141878	Quail_Scaffolded_DeNovo_contig_49666	207
Quail_Naked_DeNovo_contig_217386	Quail_Scaffolded_DeNovo_contig_49755	85
Quail_Naked_DeNovo_contig_80990	Quail_Scaffolded_DeNovo_contig_49991	1
Quail_Naked_DeNovo_contig_85114	Quail_Scaffolded_DeNovo_contig_50504	1
Quail_Naked_DeNovo_contig_33895	Quail_Scaffolded_DeNovo_contig_50523	1
Quail_Naked_DeNovo_contig_83145	Quail_Scaffolded_DeNovo_contig_50555	4859
Quail_Naked_DeNovo_contig_62222	Quail_Scaffolded_DeNovo_contig_50711	1
Quail_Naked_DeNovo_contig_138727	Quail_Scaffolded_DeNovo_contig_50722	1
Quail_Naked_DeNovo_contig_142297	Quail_Scaffolded_DeNovo_contig_50748	196
Quail_Naked_DeNovo_contig_71390	Quail_Scaffolded_DeNovo_contig_50801	1
Quail_Naked_DeNovo_contig_257096	Quail_Scaffolded_DeNovo_contig_50961	1
Quail_Naked_DeNovo_contig_126533	Quail_Scaffolded_DeNovo_contig_50995	1
Quail_Naked_DeNovo_contig_232747	Quail_Scaffolded_DeNovo_contig_51176	2
Quail_Naked_DeNovo_contig_121322	Quail_Scaffolded_DeNovo_contig_51263	176
Quail_Naked_DeNovo_contig_141793	Quail_Scaffolded_DeNovo_contig_51440	1
Quail_Naked_DeNovo_contig_249863	Quail_Scaffolded_DeNovo_contig_51558	12
Quail_Naked_DeNovo_contig_124789	Quail_Scaffolded_DeNovo_contig_51828	1
Quail_Naked_DeNovo_contig_142348	Quail_Scaffolded_DeNovo_contig_51940	1
Quail_Naked_DeNovo_contig_143396	Quail_Scaffolded_DeNovo_contig_52310	1
Quail_Naked_DeNovo_contig_74473	Quail_Scaffolded_DeNovo_contig_52322	1
Quail_Naked_DeNovo_contig_167238	Quail_Scaffolded_DeNovo_contig_52502	5504
Quail_Naked_DeNovo_contig_235534	Quail_Scaffolded_DeNovo_contig_52533	18
Quail_Naked_DeNovo_contig_50258	Quail_Scaffolded_DeNovo_contig_52668	5113
Quail_Naked_DeNovo_contig_93068	Quail_Scaffolded_DeNovo_contig_52718	1
Quail_Naked_DeNovo_contig_116443	Quail_Scaffolded_DeNovo_contig_52911	1
Quail_Naked_DeNovo_contig_78005	Quail_Scaffolded_DeNovo_contig_53017	1
Quail_Naked_DeNovo_contig_134709	Quail_Scaffolded_DeNovo_contig_53094	1
Quail_Naked_DeNovo_contig_133002	Quail_Scaffolded_DeNovo_contig_53448	1
Quail_Naked_DeNovo_contig_42773	Quail_Scaffolded_DeNovo_contig_53502	1
Quail_Naked_DeNovo_contig_247287	Quail_Scaffolded_DeNovo_contig_53502	477
Quail_Naked_DeNovo_contig_160173	Quail_Scaffolded_DeNovo_contig_53780	277
Quail_Naked_DeNovo_contig_127754	Quail_Scaffolded_DeNovo_contig_53815	1
Quail_Naked_DeNovo_contig_1306	Quail_Scaffolded_DeNovo_contig_53845	7962
Quail_Naked_DeNovo_contig_81271	Quail_Scaffolded_DeNovo_contig_53860	1
Quail_Naked_DeNovo_contig_169216	Quail_Scaffolded_DeNovo_contig_54157	83
Quail_Naked_DeNovo_contig_144641	Quail_Scaffolded_DeNovo_contig_54201	1
Quail_Naked_DeNovo_contig_139702	Quail_Scaffolded_DeNovo_contig_54203	1
Quail_Naked_DeNovo_contig_27262	Quail_Scaffolded_DeNovo_contig_54257	45
Quail_Naked_DeNovo_contig_71109	Quail_Scaffolded_DeNovo_contig_54257	45
Quail_Naked_DeNovo_contig_147915	Quail_Scaffolded_DeNovo_contig_54586	1
Quail_Naked_DeNovo_contig_13225	Quail_Scaffolded_DeNovo_contig_54722	2526
Quail_Naked_DeNovo_contig_2381	Quail_Scaffolded_DeNovo_contig_54873	1
Quail_Naked_DeNovo_contig_50889	Quail_Scaffolded_DeNovo_contig_54890	1
Quail_Naked_DeNovo_contig_262484	Quail_Scaffolded_DeNovo_contig_54942	12093
Quail_Naked_DeNovo_contig_141571	Quail_Scaffolded_DeNovo_contig_55107	1
Quail_Naked_DeNovo_contig_45592	Quail_Scaffolded_DeNovo_contig_55251	1
Quail_Naked_DeNovo_contig_265017	Quail_Scaffolded_DeNovo_contig_55285	185
Quail_Naked_DeNovo_contig_23041	Quail_Scaffolded_DeNovo_contig_55359	1
Quail_Naked_DeNovo_contig_135221	Quail_Scaffolded_DeNovo_contig_55389	1
Quail_Naked_DeNovo_contig_146203	Quail_Scaffolded_DeNovo_contig_55778	718
Quail_Naked_DeNovo_contig_98041	Quail_Scaffolded_DeNovo_contig_55878	6161
Quail_Naked_DeNovo_contig_137341	Quail_Scaffolded_DeNovo_contig_55886	1
Quail_Naked_DeNovo_contig_243516	Quail_Scaffolded_DeNovo_contig_55886	204
Quail_Naked_DeNovo_contig_120523	Quail_Scaffolded_DeNovo_contig_56094	1
Quail_Naked_DeNovo_contig_120524	Quail_Scaffolded_DeNovo_contig_56094	4339
Quail_Naked_DeNovo_contig_129383	Quail_Scaffolded_DeNovo_contig_56103	1370
Quail_Naked_DeNovo_contig_118556	Quail_Scaffolded_DeNovo_contig_56302	1
Quail_Naked_DeNovo_contig_149153	Quail_Scaffolded_DeNovo_contig_56359	1
Quail_Naked_DeNovo_contig_153369	Quail_Scaffolded_DeNovo_contig_56361	1
Quail_Naked_DeNovo_contig_44936	Quail_Scaffolded_DeNovo_contig_56406	133
Quail_Naked_DeNovo_contig_39628	Quail_Scaffolded_DeNovo_contig_56406	133
Quail_Naked_DeNovo_contig_134666	Quail_Scaffolded_DeNovo_contig_56409	1
Quail_Naked_DeNovo_contig_149040	Quail_Scaffolded_DeNovo_contig_56423	1
Quail_Naked_DeNovo_contig_149306	Quail_Scaffolded_DeNovo_contig_56496	1
Quail_Naked_DeNovo_contig_17492	Quail_Scaffolded_DeNovo_contig_56575	165
Quail_Naked_DeNovo_contig_204358	Quail_Scaffolded_DeNovo_contig_56634	788
Quail_Naked_DeNovo_contig_208121	Quail_Scaffolded_DeNovo_contig_56686	1650
Quail_Naked_DeNovo_contig_254235	Quail_Scaffolded_DeNovo_contig_56719	472
Quail_Naked_DeNovo_contig_340280	Quail_Scaffolded_DeNovo_contig_56743	24
Quail_Naked_DeNovo_contig_107281	Quail_Scaffolded_DeNovo_contig_56743	83
Quail_Naked_DeNovo_contig_152581	Quail_Scaffolded_DeNovo_contig_57019	1
Quail_Naked_DeNovo_contig_15568	Quail_Scaffolded_DeNovo_contig_57098	1
Quail_Naked_DeNovo_contig_143659	Quail_Scaffolded_DeNovo_contig_57319	1
Quail_Naked_DeNovo_contig_134935	Quail_Scaffolded_DeNovo_contig_57324	1
Quail_Naked_DeNovo_contig_130082	Quail_Scaffolded_DeNovo_contig_57567	1
Quail_Naked_DeNovo_contig_83330	Quail_Scaffolded_DeNovo_contig_57793	1
Quail_Naked_DeNovo_contig_230900	Quail_Scaffolded_DeNovo_contig_57976	447
Quail_Naked_DeNovo_contig_114238	Quail_Scaffolded_DeNovo_contig_58065	1
Quail_Naked_DeNovo_contig_3928	Quail_Scaffolded_DeNovo_contig_58108	1
Quail_Naked_DeNovo_contig_60165	Quail_Scaffolded_DeNovo_contig_58145	1
Quail_Naked_DeNovo_contig_170556	Quail_Scaffolded_DeNovo_contig_58232	1
Quail_Naked_DeNovo_contig_120758	Quail_Scaffolded_DeNovo_contig_58399	1
Quail_Naked_DeNovo_contig_72548	Quail_Scaffolded_DeNovo_contig_58409	1
Quail_Naked_DeNovo_contig_110965	Quail_Scaffolded_DeNovo_contig_58543	1
Quail_Naked_DeNovo_contig_128510	Quail_Scaffolded_DeNovo_contig_58589	1
Quail_Naked_DeNovo_contig_130099	Quail_Scaffolded_DeNovo_contig_58653	1
Quail_Naked_DeNovo_contig_62924	Quail_Scaffolded_DeNovo_contig_58657	147
Quail_Naked_DeNovo_contig_154070	Quail_Scaffolded_DeNovo_contig_58692	1
Quail_Naked_DeNovo_contig_303519	Quail_Scaffolded_DeNovo_contig_58766	7768
Quail_Naked_DeNovo_contig_170027	Quail_Scaffolded_DeNovo_contig_58795	1
Quail_Naked_DeNovo_contig_298727	Quail_Scaffolded_DeNovo_contig_59198	566
Quail_Naked_DeNovo_contig_182278	Quail_Scaffolded_DeNovo_contig_59207	4302
Quail_Naked_DeNovo_contig_184440	Quail_Scaffolded_DeNovo_contig_59406	1
Quail_Naked_DeNovo_contig_257781	Quail_Scaffolded_DeNovo_contig_59487	750
Quail_Naked_DeNovo_contig_331641	Quail_Scaffolded_DeNovo_contig_59590	2706
Quail_Naked_DeNovo_contig_123440	Quail_Scaffolded_DeNovo_contig_59594	1
Quail_Naked_DeNovo_contig_36494	Quail_Scaffolded_DeNovo_contig_59905	1
Quail_Naked_DeNovo_contig_158480	Quail_Scaffolded_DeNovo_contig_59977	1
Quail_Naked_DeNovo_contig_60962	Quail_Scaffolded_DeNovo_contig_59987	414
Quail_Naked_DeNovo_contig_82067	Quail_Scaffolded_DeNovo_contig_59987	645
Quail_Naked_DeNovo_contig_223294	Quail_Scaffolded_DeNovo_contig_60083	1200
Quail_Naked_DeNovo_contig_236452	Quail_Scaffolded_DeNovo_contig_60276	645
Quail_Naked_DeNovo_contig_135577	Quail_Scaffolded_DeNovo_contig_60302	1
Quail_Naked_DeNovo_contig_110547	Quail_Scaffolded_DeNovo_contig_60376	1
Quail_Naked_DeNovo_contig_161863	Quail_Scaffolded_DeNovo_contig_60477	223
Quail_Naked_DeNovo_contig_143613	Quail_Scaffolded_DeNovo_contig_60609	1
Quail_Naked_DeNovo_contig_91344	Quail_Scaffolded_DeNovo_contig_60656	1
Quail_Naked_DeNovo_contig_208915	Quail_Scaffolded_DeNovo_contig_60661	762
Quail_Naked_DeNovo_contig_26459	Quail_Scaffolded_DeNovo_contig_60705	6644
Quail_Naked_DeNovo_contig_102780	Quail_Scaffolded_DeNovo_contig_60746	1
Quail_Naked_DeNovo_contig_166668	Quail_Scaffolded_DeNovo_contig_60759	418
Quail_Naked_DeNovo_contig_95924	Quail_Scaffolded_DeNovo_contig_60820	1
Quail_Naked_DeNovo_contig_115281	Quail_Scaffolded_DeNovo_contig_60965	1
Quail_Naked_DeNovo_contig_241397	Quail_Scaffolded_DeNovo_contig_60973	8
Quail_Naked_DeNovo_contig_164096	Quail_Scaffolded_DeNovo_contig_61528	1
Quail_Naked_DeNovo_contig_94455	Quail_Scaffolded_DeNovo_contig_61554	1
Quail_Naked_DeNovo_contig_73589	Quail_Scaffolded_DeNovo_contig_61590	1
Quail_Naked_DeNovo_contig_287617	Quail_Scaffolded_DeNovo_contig_61729	16
Quail_Naked_DeNovo_contig_29109	Quail_Scaffolded_DeNovo_contig_62005	20
Quail_Naked_DeNovo_contig_120264	Quail_Scaffolded_DeNovo_contig_62010	1
Quail_Naked_DeNovo_contig_148790	Quail_Scaffolded_DeNovo_contig_62100	1
Quail_Naked_DeNovo_contig_79715	Quail_Scaffolded_DeNovo_contig_62121	1
Quail_Naked_DeNovo_contig_84719	Quail_Scaffolded_DeNovo_contig_62123	1
Quail_Naked_DeNovo_contig_121007	Quail_Scaffolded_DeNovo_contig_62132	212
Quail_Naked_DeNovo_contig_109190	Quail_Scaffolded_DeNovo_contig_62207	1
Quail_Naked_DeNovo_contig_26845	Quail_Scaffolded_DeNovo_contig_62510	1
Quail_Naked_DeNovo_contig_119882	Quail_Scaffolded_DeNovo_contig_62512	1
Quail_Naked_DeNovo_contig_171470	Quail_Scaffolded_DeNovo_contig_62748	2650
Quail_Naked_DeNovo_contig_152560	Quail_Scaffolded_DeNovo_contig_62806	4873
Quail_Naked_DeNovo_contig_151066	Quail_Scaffolded_DeNovo_contig_62812	1
Quail_Naked_DeNovo_contig_112049	Quail_Scaffolded_DeNovo_contig_62882	1
Quail_Naked_DeNovo_contig_11989	Quail_Scaffolded_DeNovo_contig_62949	16
Quail_Naked_DeNovo_contig_219674	Quail_Scaffolded_DeNovo_contig_63029	7687
Quail_Naked_DeNovo_contig_146329	Quail_Scaffolded_DeNovo_contig_63035	12764
Quail_Naked_DeNovo_contig_75686	Quail_Scaffolded_DeNovo_contig_63115	1
Quail_Naked_DeNovo_contig_63641	Quail_Scaffolded_DeNovo_contig_63133	2003
Quail_Naked_DeNovo_contig_35285	Quail_Scaffolded_DeNovo_contig_63180	280
Quail_Naked_DeNovo_contig_188674	Quail_Scaffolded_DeNovo_contig_63184	1
Quail_Naked_DeNovo_contig_342542	Quail_Scaffolded_DeNovo_contig_63285	1
Quail_Naked_DeNovo_contig_150076	Quail_Scaffolded_DeNovo_contig_63500	3
Quail_Naked_DeNovo_contig_286237	Quail_Scaffolded_DeNovo_contig_63781	329
Quail_Naked_DeNovo_contig_176175	Quail_Scaffolded_DeNovo_contig_63802	44
Quail_Naked_DeNovo_contig_189124	Quail_Scaffolded_DeNovo_contig_63822	313
Quail_Naked_DeNovo_contig_72987	Quail_Scaffolded_DeNovo_contig_64008	1
Quail_Naked_DeNovo_contig_129291	Quail_Scaffolded_DeNovo_contig_64038	1
Quail_Naked_DeNovo_contig_59464	Quail_Scaffolded_DeNovo_contig_64039	1
Quail_Naked_DeNovo_contig_9199	Quail_Scaffolded_DeNovo_contig_64140	396
Quail_Naked_DeNovo_contig_218491	Quail_Scaffolded_DeNovo_contig_64230	1
Quail_Naked_DeNovo_contig_171858	Quail_Scaffolded_DeNovo_contig_64245	79
Quail_Naked_DeNovo_contig_133255	Quail_Scaffolded_DeNovo_contig_64359	172
Quail_Naked_DeNovo_contig_182499	Quail_Scaffolded_DeNovo_contig_64494	1
Quail_Naked_DeNovo_contig_236230	Quail_Scaffolded_DeNovo_contig_64741	2903
Quail_Naked_DeNovo_contig_26225	Quail_Scaffolded_DeNovo_contig_64913	110
Quail_Naked_DeNovo_contig_175712	Quail_Scaffolded_DeNovo_contig_65038	1
Quail_Naked_DeNovo_contig_295287	Quail_Scaffolded_DeNovo_contig_65084	13716
Quail_Naked_DeNovo_contig_173005	Quail_Scaffolded_DeNovo_contig_65254	1
Quail_Naked_DeNovo_contig_112105	Quail_Scaffolded_DeNovo_contig_65312	239
Quail_Naked_DeNovo_contig_16500	Quail_Scaffolded_DeNovo_contig_65509	1
Quail_Naked_DeNovo_contig_120347	Quail_Scaffolded_DeNovo_contig_65610	1
Quail_Naked_DeNovo_contig_148815	Quail_Scaffolded_DeNovo_contig_65659	572
Quail_Naked_DeNovo_contig_157294	Quail_Scaffolded_DeNovo_contig_65715	1
Quail_Naked_DeNovo_contig_163915	Quail_Scaffolded_DeNovo_contig_65777	1
Quail_Naked_DeNovo_contig_164820	Quail_Scaffolded_DeNovo_contig_65786	106
Quail_Naked_DeNovo_contig_128317	Quail_Scaffolded_DeNovo_contig_65991	1
Quail_Naked_DeNovo_contig_164801	Quail_Scaffolded_DeNovo_contig_66262	1
Quail_Naked_DeNovo_contig_181215	Quail_Scaffolded_DeNovo_contig_66404	1
Quail_Naked_DeNovo_contig_184920	Quail_Scaffolded_DeNovo_contig_66834	453
Quail_Naked_DeNovo_contig_258540	Quail_Scaffolded_DeNovo_contig_66834	579
Quail_Naked_DeNovo_contig_217482	Quail_Scaffolded_DeNovo_contig_66834	584
Quail_Naked_DeNovo_contig_71335	Quail_Scaffolded_DeNovo_contig_66914	1
Quail_Naked_DeNovo_contig_151926	Quail_Scaffolded_DeNovo_contig_66916	2516
Quail_Naked_DeNovo_contig_189800	Quail_Scaffolded_DeNovo_contig_67057	1
Quail_Naked_DeNovo_contig_132888	Quail_Scaffolded_DeNovo_contig_67103	1
Quail_Naked_DeNovo_contig_159182	Quail_Scaffolded_DeNovo_contig_67122	1
Quail_Naked_DeNovo_contig_251772	Quail_Scaffolded_DeNovo_contig_67210	12954
Quail_Naked_DeNovo_contig_183726	Quail_Scaffolded_DeNovo_contig_67302	70
Quail_Naked_DeNovo_contig_120097	Quail_Scaffolded_DeNovo_contig_67459	5664
Quail_Naked_DeNovo_contig_52565	Quail_Scaffolded_DeNovo_contig_67524	1
Quail_Naked_DeNovo_contig_47418	Quail_Scaffolded_DeNovo_contig_67602	405
Quail_Naked_DeNovo_contig_167216	Quail_Scaffolded_DeNovo_contig_67736	1
Quail_Naked_DeNovo_contig_306326	Quail_Scaffolded_DeNovo_contig_67761	238
Quail_Naked_DeNovo_contig_73498	Quail_Scaffolded_DeNovo_contig_67794	2138
Quail_Naked_DeNovo_contig_26069	Quail_Scaffolded_DeNovo_contig_67801	336
Quail_Naked_DeNovo_contig_167823	Quail_Scaffolded_DeNovo_contig_67895	1
Quail_Naked_DeNovo_contig_146960	Quail_Scaffolded_DeNovo_contig_68102	4883
Quail_Naked_DeNovo_contig_168831	Quail_Scaffolded_DeNovo_contig_68108	1
Quail_Naked_DeNovo_contig_134555	Quail_Scaffolded_DeNovo_contig_68126	1301
Quail_Naked_DeNovo_contig_53251	Quail_Scaffolded_DeNovo_contig_68451	3091
Quail_Naked_DeNovo_contig_329374	Quail_Scaffolded_DeNovo_contig_68701	7348
Quail_Naked_DeNovo_contig_295283	Quail_Scaffolded_DeNovo_contig_68906	1
Quail_Naked_DeNovo_contig_26101	Quail_Scaffolded_DeNovo_contig_68970	1
Quail_Naked_DeNovo_contig_139594	Quail_Scaffolded_DeNovo_contig_69034	1
Quail_Naked_DeNovo_contig_6210	Quail_Scaffolded_DeNovo_contig_69052	1
Quail_Naked_DeNovo_contig_98073	Quail_Scaffolded_DeNovo_contig_69086	986
Quail_Naked_DeNovo_contig_161495	Quail_Scaffolded_DeNovo_contig_69140	1
Quail_Naked_DeNovo_contig_166370	Quail_Scaffolded_DeNovo_contig_69142	1
Quail_Naked_DeNovo_contig_156525	Quail_Scaffolded_DeNovo_contig_69165	1
Quail_Naked_DeNovo_contig_267191	Quail_Scaffolded_DeNovo_contig_69181	158
Quail_Naked_DeNovo_contig_79399	Quail_Scaffolded_DeNovo_contig_69235	1
Quail_Naked_DeNovo_contig_96555	Quail_Scaffolded_DeNovo_contig_69427	1
Quail_Naked_DeNovo_contig_126406	Quail_Scaffolded_DeNovo_contig_69454	1
Quail_Naked_DeNovo_contig_45463	Quail_Scaffolded_DeNovo_contig_69767	357
Quail_Naked_DeNovo_contig_8244	Quail_Scaffolded_DeNovo_contig_69913	1
Quail_Naked_DeNovo_contig_59269	Quail_Scaffolded_DeNovo_contig_70099	19
Quail_Naked_DeNovo_contig_48767	Quail_Scaffolded_DeNovo_contig_70288	1
Quail_Naked_DeNovo_contig_55697	Quail_Scaffolded_DeNovo_contig_70711	37
Quail_Naked_DeNovo_contig_140019	Quail_Scaffolded_DeNovo_contig_71120	1
Quail_Naked_DeNovo_contig_138869	Quail_Scaffolded_DeNovo_contig_71249	6216
Quail_Naked_DeNovo_contig_170714	Quail_Scaffolded_DeNovo_contig_71259	1
Quail_Naked_DeNovo_contig_97708	Quail_Scaffolded_DeNovo_contig_71383	1
Quail_Naked_DeNovo_contig_200779	Quail_Scaffolded_DeNovo_contig_71393	96
Quail_Naked_DeNovo_contig_196776	Quail_Scaffolded_DeNovo_contig_71485	9036
Quail_Naked_DeNovo_contig_147306	Quail_Scaffolded_DeNovo_contig_71523	181
Quail_Naked_DeNovo_contig_72574	Quail_Scaffolded_DeNovo_contig_71681	1
Quail_Naked_DeNovo_contig_235481	Quail_Scaffolded_DeNovo_contig_71752	92
Quail_Naked_DeNovo_contig_45919	Quail_Scaffolded_DeNovo_contig_72416	1
Quail_Naked_DeNovo_contig_143051	Quail_Scaffolded_DeNovo_contig_72450	1
Quail_Naked_DeNovo_contig_43530	Quail_Scaffolded_DeNovo_contig_72575	18813
Quail_Naked_DeNovo_contig_177607	Quail_Scaffolded_DeNovo_contig_72672	1
Quail_Naked_DeNovo_contig_33191	Quail_Scaffolded_DeNovo_contig_73301	5107
Quail_Naked_DeNovo_contig_29642	Quail_Scaffolded_DeNovo_contig_73491	1
Quail_Naked_DeNovo_contig_304667	Quail_Scaffolded_DeNovo_contig_73579	5544
Quail_Naked_DeNovo_contig_162411	Quail_Scaffolded_DeNovo_contig_73732	13
Quail_Naked_DeNovo_contig_118880	Quail_Scaffolded_DeNovo_contig_73842	1
Quail_Naked_DeNovo_contig_309323	Quail_Scaffolded_DeNovo_contig_73951	532
Quail_Naked_DeNovo_contig_200767	Quail_Scaffolded_DeNovo_contig_74091	1
Quail_Naked_DeNovo_contig_264165	Quail_Scaffolded_DeNovo_contig_74105	1
Quail_Naked_DeNovo_contig_163149	Quail_Scaffolded_DeNovo_contig_74230	1
Quail_Naked_DeNovo_contig_118561	Quail_Scaffolded_DeNovo_contig_74304	1
Quail_Naked_DeNovo_contig_145993	Quail_Scaffolded_DeNovo_contig_74322	1
Quail_Naked_DeNovo_contig_165263	Quail_Scaffolded_DeNovo_contig_74369	5345
Quail_Naked_DeNovo_contig_146502	Quail_Scaffolded_DeNovo_contig_74547	1
Quail_Naked_DeNovo_contig_166674	Quail_Scaffolded_DeNovo_contig_74555	1
Quail_Naked_DeNovo_contig_42409	Quail_Scaffolded_DeNovo_contig_74722	394
Quail_Naked_DeNovo_contig_101519	Quail_Scaffolded_DeNovo_contig_74748	753
Quail_Naked_DeNovo_contig_131334	Quail_Scaffolded_DeNovo_contig_74792	1
Quail_Naked_DeNovo_contig_137799	Quail_Scaffolded_DeNovo_contig_74819	117
Quail_Naked_DeNovo_contig_174530	Quail_Scaffolded_DeNovo_contig_75067	1
Quail_Naked_DeNovo_contig_176684	Quail_Scaffolded_DeNovo_contig_75338	1
Quail_Naked_DeNovo_contig_12669	Quail_Scaffolded_DeNovo_contig_75345	1
Quail_Naked_DeNovo_contig_170900	Quail_Scaffolded_DeNovo_contig_75563	1
Quail_Naked_DeNovo_contig_309061	Quail_Scaffolded_DeNovo_contig_75816	272
Quail_Naked_DeNovo_contig_62430	Quail_Scaffolded_DeNovo_contig_75844	1
Quail_Naked_DeNovo_contig_32949	Quail_Scaffolded_DeNovo_contig_75930	1
Quail_Naked_DeNovo_contig_172314	Quail_Scaffolded_DeNovo_contig_75997	1
Quail_Naked_DeNovo_contig_292233	Quail_Scaffolded_DeNovo_contig_76052	1
Quail_Naked_DeNovo_contig_252967	Quail_Scaffolded_DeNovo_contig_76052	26
Quail_Naked_DeNovo_contig_74783	Quail_Scaffolded_DeNovo_contig_76110	334
Quail_Naked_DeNovo_contig_7567	Quail_Scaffolded_DeNovo_contig_76205	1
Quail_Naked_DeNovo_contig_149378	Quail_Scaffolded_DeNovo_contig_76338	1
Quail_Naked_DeNovo_contig_331085	Quail_Scaffolded_DeNovo_contig_76458	1
Quail_Naked_DeNovo_contig_176551	Quail_Scaffolded_DeNovo_contig_76539	605
Quail_Naked_DeNovo_contig_201090	Quail_Scaffolded_DeNovo_contig_76699	1
Quail_Naked_DeNovo_contig_174551	Quail_Scaffolded_DeNovo_contig_76712	155
Quail_Naked_DeNovo_contig_57877	Quail_Scaffolded_DeNovo_contig_76924	112
Quail_Naked_DeNovo_contig_27548	Quail_Scaffolded_DeNovo_contig_76949	7120
Quail_Naked_DeNovo_contig_148841	Quail_Scaffolded_DeNovo_contig_77028	357
Quail_Naked_DeNovo_contig_115883	Quail_Scaffolded_DeNovo_contig_77034	274
Quail_Naked_DeNovo_contig_65696	Quail_Scaffolded_DeNovo_contig_77040	1
Quail_Naked_DeNovo_contig_120154	Quail_Scaffolded_DeNovo_contig_77102	1
Quail_Naked_DeNovo_contig_328613	Quail_Scaffolded_DeNovo_contig_77345	184
Quail_Naked_DeNovo_contig_155576	Quail_Scaffolded_DeNovo_contig_77461	664
Quail_Naked_DeNovo_contig_182911	Quail_Scaffolded_DeNovo_contig_77813	1
Quail_Naked_DeNovo_contig_18985	Quail_Scaffolded_DeNovo_contig_77815	1
Quail_Naked_DeNovo_contig_213966	Quail_Scaffolded_DeNovo_contig_77831	1
Quail_Naked_DeNovo_contig_56939	Quail_Scaffolded_DeNovo_contig_78087	1
Quail_Naked_DeNovo_contig_185264	Quail_Scaffolded_DeNovo_contig_78514	1
Quail_Naked_DeNovo_contig_300330	Quail_Scaffolded_DeNovo_contig_78645	1
Quail_Naked_DeNovo_contig_244068	Quail_Scaffolded_DeNovo_contig_78805	1217
Quail_Naked_DeNovo_contig_196110	Quail_Scaffolded_DeNovo_contig_79058	1
Quail_Naked_DeNovo_contig_31830	Quail_Scaffolded_DeNovo_contig_79081	1
Quail_Naked_DeNovo_contig_199582	Quail_Scaffolded_DeNovo_contig_79097	1
Quail_Naked_DeNovo_contig_343799	Quail_Scaffolded_DeNovo_contig_79097	1
Quail_Naked_DeNovo_contig_118582	Quail_Scaffolded_DeNovo_contig_79178	1
Quail_Naked_DeNovo_contig_178314	Quail_Scaffolded_DeNovo_contig_79325	1
Quail_Naked_DeNovo_contig_76938	Quail_Scaffolded_DeNovo_contig_79519	7
Quail_Naked_DeNovo_contig_31029	Quail_Scaffolded_DeNovo_contig_79626	1
Quail_Naked_DeNovo_contig_179127	Quail_Scaffolded_DeNovo_contig_79720	1
Quail_Naked_DeNovo_contig_156616	Quail_Scaffolded_DeNovo_contig_79981	1
Quail_Naked_DeNovo_contig_159265	Quail_Scaffolded_DeNovo_contig_80029	1
Quail_Naked_DeNovo_contig_38560	Quail_Scaffolded_DeNovo_contig_80302	1
Quail_Naked_DeNovo_contig_154588	Quail_Scaffolded_DeNovo_contig_80595	1
Quail_Naked_DeNovo_contig_350706	Quail_Scaffolded_DeNovo_contig_81013	52
Quail_Naked_DeNovo_contig_197335	Quail_Scaffolded_DeNovo_contig_81200	23
Quail_Naked_DeNovo_contig_138660	Quail_Scaffolded_DeNovo_contig_81242	1
Quail_Naked_DeNovo_contig_217179	Quail_Scaffolded_DeNovo_contig_81297	2125
Quail_Naked_DeNovo_contig_198225	Quail_Scaffolded_DeNovo_contig_81501	1
Quail_Naked_DeNovo_contig_138544	Quail_Scaffolded_DeNovo_contig_81677	380
Quail_Naked_DeNovo_contig_143272	Quail_Scaffolded_DeNovo_contig_81813	2425
Quail_Naked_DeNovo_contig_31293	Quail_Scaffolded_DeNovo_contig_82022	278
Quail_Naked_DeNovo_contig_183897	Quail_Scaffolded_DeNovo_contig_82446	345
Quail_Naked_DeNovo_contig_168239	Quail_Scaffolded_DeNovo_contig_82457	1
Quail_Naked_DeNovo_contig_140826	Quail_Scaffolded_DeNovo_contig_82507	1
Quail_Naked_DeNovo_contig_220732	Quail_Scaffolded_DeNovo_contig_82546	253
Quail_Naked_DeNovo_contig_7114	Quail_Scaffolded_DeNovo_contig_82814	1
Quail_Naked_DeNovo_contig_282294	Quail_Scaffolded_DeNovo_contig_83040	237
Quail_Naked_DeNovo_contig_134689	Quail_Scaffolded_DeNovo_contig_83526	1
Quail_Naked_DeNovo_contig_197320	Quail_Scaffolded_DeNovo_contig_83592	449
Quail_Naked_DeNovo_contig_235876	Quail_Scaffolded_DeNovo_contig_83779	1263
Quail_Naked_DeNovo_contig_205794	Quail_Scaffolded_DeNovo_contig_83962	1
Quail_Naked_DeNovo_contig_145260	Quail_Scaffolded_DeNovo_contig_84154	1
Quail_Naked_DeNovo_contig_113853	Quail_Scaffolded_DeNovo_contig_84213	1
Quail_Naked_DeNovo_contig_191767	Quail_Scaffolded_DeNovo_contig_84231	1
Quail_Naked_DeNovo_contig_168089	Quail_Scaffolded_DeNovo_contig_84443	81
Quail_Naked_DeNovo_contig_305997	Quail_Scaffolded_DeNovo_contig_84470	1
Quail_Naked_DeNovo_contig_210489	Quail_Scaffolded_DeNovo_contig_84537	1
Quail_Naked_DeNovo_contig_259951	Quail_Scaffolded_DeNovo_contig_84711	1515
Quail_Naked_DeNovo_contig_204128	Quail_Scaffolded_DeNovo_contig_84790	1
Quail_Naked_DeNovo_contig_195334	Quail_Scaffolded_DeNovo_contig_84844	1
Quail_Naked_DeNovo_contig_120685	Quail_Scaffolded_DeNovo_contig_84963	1
Quail_Naked_DeNovo_contig_135893	Quail_Scaffolded_DeNovo_contig_85012	1
Quail_Naked_DeNovo_contig_134864	Quail_Scaffolded_DeNovo_contig_85134	1
Quail_Naked_DeNovo_contig_209937	Quail_Scaffolded_DeNovo_contig_85263	5273
Quail_Naked_DeNovo_contig_280527	Quail_Scaffolded_DeNovo_contig_85416	347
Quail_Naked_DeNovo_contig_24699	Quail_Scaffolded_DeNovo_contig_85440	1
Quail_Naked_DeNovo_contig_312986	Quail_Scaffolded_DeNovo_contig_85448	1
Quail_Naked_DeNovo_contig_208242	Quail_Scaffolded_DeNovo_contig_85453	1
Quail_Naked_DeNovo_contig_44429	Quail_Scaffolded_DeNovo_contig_85534	1
Quail_Naked_DeNovo_contig_168861	Quail_Scaffolded_DeNovo_contig_85731	1
Quail_Naked_DeNovo_contig_204288	Quail_Scaffolded_DeNovo_contig_85898	1
Quail_Naked_DeNovo_contig_174504	Quail_Scaffolded_DeNovo_contig_85945	1
Quail_Naked_DeNovo_contig_105748	Quail_Scaffolded_DeNovo_contig_86260	136
Quail_Naked_DeNovo_contig_261357	Quail_Scaffolded_DeNovo_contig_86487	2
Quail_Naked_DeNovo_contig_261358	Quail_Scaffolded_DeNovo_contig_86487	2
Quail_Naked_DeNovo_contig_106165	Quail_Scaffolded_DeNovo_contig_86564	1
Quail_Naked_DeNovo_contig_39396	Quail_Scaffolded_DeNovo_contig_86653	1
Quail_Naked_DeNovo_contig_27259	Quail_Scaffolded_DeNovo_contig_86679	1
Quail_Naked_DeNovo_contig_143840	Quail_Scaffolded_DeNovo_contig_86717	1
Quail_Naked_DeNovo_contig_101792	Quail_Scaffolded_DeNovo_contig_86789	1
Quail_Naked_DeNovo_contig_109245	Quail_Scaffolded_DeNovo_contig_86793	1
Quail_Naked_DeNovo_contig_141578	Quail_Scaffolded_DeNovo_contig_86938	296
Quail_Naked_DeNovo_contig_208459	Quail_Scaffolded_DeNovo_contig_87331	1
Quail_Naked_DeNovo_contig_210552	Quail_Scaffolded_DeNovo_contig_87581	1
Quail_Naked_DeNovo_contig_133566	Quail_Scaffolded_DeNovo_contig_87629	991
Quail_Naked_DeNovo_contig_171978	Quail_Scaffolded_DeNovo_contig_87637	1
Quail_Naked_DeNovo_contig_174462	Quail_Scaffolded_DeNovo_contig_88464	1
Quail_Naked_DeNovo_contig_200784	Quail_Scaffolded_DeNovo_contig_88468	38
Quail_Naked_DeNovo_contig_173348	Quail_Scaffolded_DeNovo_contig_88475	1
Quail_Naked_DeNovo_contig_205511	Quail_Scaffolded_DeNovo_contig_88597	216
Quail_Naked_DeNovo_contig_132007	Quail_Scaffolded_DeNovo_contig_88792	1
Quail_Naked_DeNovo_contig_210222	Quail_Scaffolded_DeNovo_contig_88880	1
Quail_Naked_DeNovo_contig_82258	Quail_Scaffolded_DeNovo_contig_89200	1
Quail_Naked_DeNovo_contig_215406	Quail_Scaffolded_DeNovo_contig_89405	5027
Quail_Naked_DeNovo_contig_70296	Quail_Scaffolded_DeNovo_contig_89619	1
Quail_Naked_DeNovo_contig_187697	Quail_Scaffolded_DeNovo_contig_89710	304
Quail_Naked_DeNovo_contig_101981	Quail_Scaffolded_DeNovo_contig_89921	1
Quail_Naked_DeNovo_contig_314228	Quail_Scaffolded_DeNovo_contig_90025	673
Quail_Naked_DeNovo_contig_303183	Quail_Scaffolded_DeNovo_contig_90100	1350
Quail_Naked_DeNovo_contig_64412	Quail_Scaffolded_DeNovo_contig_90258	2038
Quail_Naked_DeNovo_contig_137259	Quail_Scaffolded_DeNovo_contig_90534	272
Quail_Naked_DeNovo_contig_209344	Quail_Scaffolded_DeNovo_contig_90762	1
Quail_Naked_DeNovo_contig_162967	Quail_Scaffolded_DeNovo_contig_90845	1
Quail_Naked_DeNovo_contig_93114	Quail_Scaffolded_DeNovo_contig_90849	1
Quail_Naked_DeNovo_contig_215897	Quail_Scaffolded_DeNovo_contig_91326	1
Quail_Naked_DeNovo_contig_103974	Quail_Scaffolded_DeNovo_contig_91442	1
Quail_Naked_DeNovo_contig_248526	Quail_Scaffolded_DeNovo_contig_91533	28
Quail_Naked_DeNovo_contig_188663	Quail_Scaffolded_DeNovo_contig_91609	1
Quail_Naked_DeNovo_contig_346076	Quail_Scaffolded_DeNovo_contig_91630	68
Quail_Naked_DeNovo_contig_90209	Quail_Scaffolded_DeNovo_contig_91646	1
Quail_Naked_DeNovo_contig_182381	Quail_Scaffolded_DeNovo_contig_92002	143
Quail_Naked_DeNovo_contig_121809	Quail_Scaffolded_DeNovo_contig_92037	1
Quail_Naked_DeNovo_contig_48827	Quail_Scaffolded_DeNovo_contig_92084	1
Quail_Naked_DeNovo_contig_304633	Quail_Scaffolded_DeNovo_contig_92169	1
Quail_Naked_DeNovo_contig_89834	Quail_Scaffolded_DeNovo_contig_92353	1
Quail_Naked_DeNovo_contig_94255	Quail_Scaffolded_DeNovo_contig_92431	1
Quail_Naked_DeNovo_contig_217808	Quail_Scaffolded_DeNovo_contig_92469	1
Quail_Naked_DeNovo_contig_38082	Quail_Scaffolded_DeNovo_contig_92546	1
Quail_Naked_DeNovo_contig_26678	Quail_Scaffolded_DeNovo_contig_92772	515
Quail_Naked_DeNovo_contig_156664	Quail_Scaffolded_DeNovo_contig_92775	439
Quail_Naked_DeNovo_contig_72623	Quail_Scaffolded_DeNovo_contig_92865	1
Quail_Naked_DeNovo_contig_46229	Quail_Scaffolded_DeNovo_contig_92926	28
Quail_Naked_DeNovo_contig_212436	Quail_Scaffolded_DeNovo_contig_92995	275
Quail_Naked_DeNovo_contig_250851	Quail_Scaffolded_DeNovo_contig_93040	2665
Quail_Naked_DeNovo_contig_147741	Quail_Scaffolded_DeNovo_contig_93246	1
Quail_Naked_DeNovo_contig_159480	Quail_Scaffolded_DeNovo_contig_93722	1
Quail_Naked_DeNovo_contig_146174	Quail_Scaffolded_DeNovo_contig_93738	1
Quail_Naked_DeNovo_contig_201598	Quail_Scaffolded_DeNovo_contig_93813	1
Quail_Naked_DeNovo_contig_46449	Quail_Scaffolded_DeNovo_contig_94004	1
Quail_Naked_DeNovo_contig_215223	Quail_Scaffolded_DeNovo_contig_94214	389
Quail_Naked_DeNovo_contig_264308	Quail_Scaffolded_DeNovo_contig_94444	674
Quail_Naked_DeNovo_contig_127898	Quail_Scaffolded_DeNovo_contig_94617	1
Quail_Naked_DeNovo_contig_49729	Quail_Scaffolded_DeNovo_contig_94711	1
Quail_Naked_DeNovo_contig_225865	Quail_Scaffolded_DeNovo_contig_94821	1
Quail_Naked_DeNovo_contig_222957	Quail_Scaffolded_DeNovo_contig_95273	1
Quail_Naked_DeNovo_contig_213502	Quail_Scaffolded_DeNovo_contig_95434	1
Quail_Naked_DeNovo_contig_153800	Quail_Scaffolded_DeNovo_contig_95545	273
Quail_Naked_DeNovo_contig_159645	Quail_Scaffolded_DeNovo_contig_95778	4768
Quail_Naked_DeNovo_contig_295239	Quail_Scaffolded_DeNovo_contig_96003	1
Quail_Naked_DeNovo_contig_166099	Quail_Scaffolded_DeNovo_contig_96163	1
Quail_Naked_DeNovo_contig_200381	Quail_Scaffolded_DeNovo_contig_96430	1
Quail_Naked_DeNovo_contig_144971	Quail_Scaffolded_DeNovo_contig_96516	1
Quail_Naked_DeNovo_contig_60916	Quail_Scaffolded_DeNovo_contig_96928	1
Quail_Naked_DeNovo_contig_217889	Quail_Scaffolded_DeNovo_contig_97291	1
Quail_Naked_DeNovo_contig_169761	Quail_Scaffolded_DeNovo_contig_97294	59
Quail_Naked_DeNovo_contig_208907	Quail_Scaffolded_DeNovo_contig_97315	776
Quail_Naked_DeNovo_contig_90916	Quail_Scaffolded_DeNovo_contig_98621	1
Quail_Naked_DeNovo_contig_306165	Quail_Scaffolded_DeNovo_contig_98678	251
Quail_Naked_DeNovo_contig_219381	Quail_Scaffolded_DeNovo_contig_98764	463
Quail_Naked_DeNovo_contig_339988	Quail_Scaffolded_DeNovo_contig_99080	3603
Quail_Naked_DeNovo_contig_204650	Quail_Scaffolded_DeNovo_contig_99300	1
Quail_Naked_DeNovo_contig_206847	Quail_Scaffolded_DeNovo_contig_99456	1
Quail_Naked_DeNovo_contig_92524	Quail_Scaffolded_DeNovo_contig_99723	1
Quail_Naked_DeNovo_contig_26236	Quail_Scaffolded_DeNovo_contig_100085	6164
Quail_Naked_DeNovo_contig_124919	Quail_Scaffolded_DeNovo_contig_100658	2554
Quail_Naked_DeNovo_contig_114277	Quail_Scaffolded_DeNovo_contig_100674	308
Quail_Naked_DeNovo_contig_202872	Quail_Scaffolded_DeNovo_contig_100689	4124
Quail_Naked_DeNovo_contig_233209	Quail_Scaffolded_DeNovo_contig_100716	1
Quail_Naked_DeNovo_contig_234860	Quail_Scaffolded_DeNovo_contig_100778	1
Quail_Naked_DeNovo_contig_143721	Quail_Scaffolded_DeNovo_contig_100807	330
Quail_Naked_DeNovo_contig_300294	Quail_Scaffolded_DeNovo_contig_100813	634
Quail_Naked_DeNovo_contig_90280	Quail_Scaffolded_DeNovo_contig_100833	1
Quail_Naked_DeNovo_contig_131370	Quail_Scaffolded_DeNovo_contig_100898	1
Quail_Naked_DeNovo_contig_214359	Quail_Scaffolded_DeNovo_contig_100926	2420
Quail_Naked_DeNovo_contig_73239	Quail_Scaffolded_DeNovo_contig_100982	2721
Quail_Naked_DeNovo_contig_130975	Quail_Scaffolded_DeNovo_contig_101069	1
Quail_Naked_DeNovo_contig_15233	Quail_Scaffolded_DeNovo_contig_101134	1
Quail_Naked_DeNovo_contig_89835	Quail_Scaffolded_DeNovo_contig_101483	1
Quail_Naked_DeNovo_contig_170612	Quail_Scaffolded_DeNovo_contig_101530	1
Quail_Naked_DeNovo_contig_179444	Quail_Scaffolded_DeNovo_contig_101664	1
Quail_Naked_DeNovo_contig_188813	Quail_Scaffolded_DeNovo_contig_101976	1
Quail_Naked_DeNovo_contig_203685	Quail_Scaffolded_DeNovo_contig_102014	1
Quail_Naked_DeNovo_contig_213601	Quail_Scaffolded_DeNovo_contig_102061	1
Quail_Naked_DeNovo_contig_225532	Quail_Scaffolded_DeNovo_contig_102234	1
Quail_Naked_DeNovo_contig_337843	Quail_Scaffolded_DeNovo_contig_102359	33
Quail_Naked_DeNovo_contig_41220	Quail_Scaffolded_DeNovo_contig_102401	1
Quail_Naked_DeNovo_contig_166834	Quail_Scaffolded_DeNovo_contig_102555	233
Quail_Naked_DeNovo_contig_214916	Quail_Scaffolded_DeNovo_contig_102615	1
Quail_Naked_DeNovo_contig_213415	Quail_Scaffolded_DeNovo_contig_103065	296
Quail_Naked_DeNovo_contig_218574	Quail_Scaffolded_DeNovo_contig_103138	86
Quail_Naked_DeNovo_contig_230506	Quail_Scaffolded_DeNovo_contig_103248	1
Quail_Naked_DeNovo_contig_277730	Quail_Scaffolded_DeNovo_contig_103818	200
Quail_Naked_DeNovo_contig_227245	Quail_Scaffolded_DeNovo_contig_103904	27
Quail_Naked_DeNovo_contig_197244	Quail_Scaffolded_DeNovo_contig_104516	1
Quail_Naked_DeNovo_contig_199911	Quail_Scaffolded_DeNovo_contig_104595	527
Quail_Naked_DeNovo_contig_82767	Quail_Scaffolded_DeNovo_contig_104786	153
Quail_Naked_DeNovo_contig_247348	Quail_Scaffolded_DeNovo_contig_104847	1
Quail_Naked_DeNovo_contig_184320	Quail_Scaffolded_DeNovo_contig_104859	1
Quail_Naked_DeNovo_contig_218810	Quail_Scaffolded_DeNovo_contig_104870	1
Quail_Naked_DeNovo_contig_233522	Quail_Scaffolded_DeNovo_contig_104999	1
Quail_Naked_DeNovo_contig_91981	Quail_Scaffolded_DeNovo_contig_105032	1
Quail_Naked_DeNovo_contig_29541	Quail_Scaffolded_DeNovo_contig_105218	1
Quail_Naked_DeNovo_contig_82880	Quail_Scaffolded_DeNovo_contig_105263	1
Quail_Naked_DeNovo_contig_218401	Quail_Scaffolded_DeNovo_contig_105265	1
Quail_Naked_DeNovo_contig_181361	Quail_Scaffolded_DeNovo_contig_105287	1
Quail_Naked_DeNovo_contig_236215	Quail_Scaffolded_DeNovo_contig_105826	1
Quail_Naked_DeNovo_contig_61616	Quail_Scaffolded_DeNovo_contig_106254	1
Quail_Naked_DeNovo_contig_236569	Quail_Scaffolded_DeNovo_contig_106889	1
Quail_Naked_DeNovo_contig_219907	Quail_Scaffolded_DeNovo_contig_106909	1
Quail_Naked_DeNovo_contig_71795	Quail_Scaffolded_DeNovo_contig_107128	1
Quail_Naked_DeNovo_contig_80681	Quail_Scaffolded_DeNovo_contig_107174	1
Quail_Naked_DeNovo_contig_120486	Quail_Scaffolded_DeNovo_contig_107200	42
Quail_Naked_DeNovo_contig_75341	Quail_Scaffolded_DeNovo_contig_107280	1
Quail_Naked_DeNovo_contig_13539	Quail_Scaffolded_DeNovo_contig_107323	1
Quail_Naked_DeNovo_contig_176435	Quail_Scaffolded_DeNovo_contig_107421	1
Quail_Naked_DeNovo_contig_235642	Quail_Scaffolded_DeNovo_contig_107496	119
Quail_Naked_DeNovo_contig_172991	Quail_Scaffolded_DeNovo_contig_107599	1
Quail_Naked_DeNovo_contig_134710	Quail_Scaffolded_DeNovo_contig_107724	1
Quail_Naked_DeNovo_contig_244950	Quail_Scaffolded_DeNovo_contig_107809	1
Quail_Naked_DeNovo_contig_165203	Quail_Scaffolded_DeNovo_contig_107956	1
Quail_Naked_DeNovo_contig_144560	Quail_Scaffolded_DeNovo_contig_107966	178
Quail_Naked_DeNovo_contig_194631	Quail_Scaffolded_DeNovo_contig_107969	1
Quail_Naked_DeNovo_contig_369136	Quail_Scaffolded_DeNovo_contig_107995	9
Quail_Naked_DeNovo_contig_274314	Quail_Scaffolded_DeNovo_contig_108042	67
Quail_Naked_DeNovo_contig_117622	Quail_Scaffolded_DeNovo_contig_108457	1
Quail_Naked_DeNovo_contig_156560	Quail_Scaffolded_DeNovo_contig_108470	1
Quail_Naked_DeNovo_contig_333143	Quail_Scaffolded_DeNovo_contig_108485	27
Quail_Naked_DeNovo_contig_66569	Quail_Scaffolded_DeNovo_contig_108586	106
Quail_Naked_DeNovo_contig_246870	Quail_Scaffolded_DeNovo_contig_108589	1
Quail_Naked_DeNovo_contig_48182	Quail_Scaffolded_DeNovo_contig_108700	32
Quail_Naked_DeNovo_contig_43	Quail_Scaffolded_DeNovo_contig_108744	1
Quail_Naked_DeNovo_contig_230813	Quail_Scaffolded_DeNovo_contig_108788	1
Quail_Naked_DeNovo_contig_133827	Quail_Scaffolded_DeNovo_contig_108846	1
Quail_Naked_DeNovo_contig_230082	Quail_Scaffolded_DeNovo_contig_108876	1
Quail_Naked_DeNovo_contig_236621	Quail_Scaffolded_DeNovo_contig_108905	1
Quail_Naked_DeNovo_contig_191127	Quail_Scaffolded_DeNovo_contig_109014	220
Quail_Naked_DeNovo_contig_234117	Quail_Scaffolded_DeNovo_contig_109034	1
Quail_Naked_DeNovo_contig_191387	Quail_Scaffolded_DeNovo_contig_109081	2305
Quail_Naked_DeNovo_contig_117801	Quail_Scaffolded_DeNovo_contig_109234	1
Quail_Naked_DeNovo_contig_243548	Quail_Scaffolded_DeNovo_contig_109646	396
Quail_Naked_DeNovo_contig_22522	Quail_Scaffolded_DeNovo_contig_109667	306
Quail_Naked_DeNovo_contig_254638	Quail_Scaffolded_DeNovo_contig_110212	1
Quail_Naked_DeNovo_contig_81166	Quail_Scaffolded_DeNovo_contig_110971	1
Quail_Naked_DeNovo_contig_117685	Quail_Scaffolded_DeNovo_contig_111011	1
Quail_Naked_DeNovo_contig_239864	Quail_Scaffolded_DeNovo_contig_111035	657
Quail_Naked_DeNovo_contig_99240	Quail_Scaffolded_DeNovo_contig_111410	285
Quail_Naked_DeNovo_contig_169118	Quail_Scaffolded_DeNovo_contig_111717	2340
Quail_Naked_DeNovo_contig_223938	Quail_Scaffolded_DeNovo_contig_112154	1
Quail_Naked_DeNovo_contig_209246	Quail_Scaffolded_DeNovo_contig_112353	1
Quail_Naked_DeNovo_contig_244786	Quail_Scaffolded_DeNovo_contig_112653	1
Quail_Naked_DeNovo_contig_169755	Quail_Scaffolded_DeNovo_contig_112743	183
Quail_Naked_DeNovo_contig_247289	Quail_Scaffolded_DeNovo_contig_112779	1
Quail_Naked_DeNovo_contig_187260	Quail_Scaffolded_DeNovo_contig_112849	1
Quail_Naked_DeNovo_contig_359122	Quail_Scaffolded_DeNovo_contig_112922	318
Quail_Naked_DeNovo_contig_57873	Quail_Scaffolded_DeNovo_contig_113257	113
Quail_Naked_DeNovo_contig_266689	Quail_Scaffolded_DeNovo_contig_113283	400
Quail_Naked_DeNovo_contig_268052	Quail_Scaffolded_DeNovo_contig_113394	1
Quail_Naked_DeNovo_contig_211786	Quail_Scaffolded_DeNovo_contig_113622	176
Quail_Naked_DeNovo_contig_338951	Quail_Scaffolded_DeNovo_contig_113866	119
Quail_Naked_DeNovo_contig_269098	Quail_Scaffolded_DeNovo_contig_114139	1
Quail_Naked_DeNovo_contig_162247	Quail_Scaffolded_DeNovo_contig_114314	445
Quail_Naked_DeNovo_contig_225718	Quail_Scaffolded_DeNovo_contig_114392	1
Quail_Naked_DeNovo_contig_74606	Quail_Scaffolded_DeNovo_contig_114392	2989
Quail_Naked_DeNovo_contig_185814	Quail_Scaffolded_DeNovo_contig_114463	1
Quail_Naked_DeNovo_contig_251103	Quail_Scaffolded_DeNovo_contig_114558	1
Quail_Naked_DeNovo_contig_81632	Quail_Scaffolded_DeNovo_contig_114719	1
Quail_Naked_DeNovo_contig_86120	Quail_Scaffolded_DeNovo_contig_114874	1
Quail_Naked_DeNovo_contig_52725	Quail_Scaffolded_DeNovo_contig_115045	1
Quail_Naked_DeNovo_contig_110292	Quail_Scaffolded_DeNovo_contig_115070	1
Quail_Naked_DeNovo_contig_96388	Quail_Scaffolded_DeNovo_contig_115110	1
Quail_Naked_DeNovo_contig_40902	Quail_Scaffolded_DeNovo_contig_115403	1
Quail_Naked_DeNovo_contig_33964	Quail_Scaffolded_DeNovo_contig_115436	1
Quail_Naked_DeNovo_contig_162535	Quail_Scaffolded_DeNovo_contig_115863	1
Quail_Naked_DeNovo_contig_139827	Quail_Scaffolded_DeNovo_contig_115905	1
Quail_Naked_DeNovo_contig_95367	Quail_Scaffolded_DeNovo_contig_116236	868
Quail_Naked_DeNovo_contig_187530	Quail_Scaffolded_DeNovo_contig_116425	1
Quail_Naked_DeNovo_contig_191938	Quail_Scaffolded_DeNovo_contig_116507	1
Quail_Naked_DeNovo_contig_330040	Quail_Scaffolded_DeNovo_contig_116735	1
Quail_Naked_DeNovo_contig_65029	Quail_Scaffolded_DeNovo_contig_116810	1
Quail_Naked_DeNovo_contig_256649	Quail_Scaffolded_DeNovo_contig_117060	1
Quail_Naked_DeNovo_contig_165514	Quail_Scaffolded_DeNovo_contig_117154	5425
Quail_Naked_DeNovo_contig_80139	Quail_Scaffolded_DeNovo_contig_117211	346
Quail_Naked_DeNovo_contig_167805	Quail_Scaffolded_DeNovo_contig_117451	1
Quail_Naked_DeNovo_contig_77862	Quail_Scaffolded_DeNovo_contig_117867	1
Quail_Naked_DeNovo_contig_247189	Quail_Scaffolded_DeNovo_contig_117896	1
Quail_Naked_DeNovo_contig_328644	Quail_Scaffolded_DeNovo_contig_117926	26
Quail_Naked_DeNovo_contig_222080	Quail_Scaffolded_DeNovo_contig_117934	318
Quail_Naked_DeNovo_contig_153402	Quail_Scaffolded_DeNovo_contig_117963	1
Quail_Naked_DeNovo_contig_241151	Quail_Scaffolded_DeNovo_contig_118332	325
Quail_Naked_DeNovo_contig_161388	Quail_Scaffolded_DeNovo_contig_118394	1
Quail_Naked_DeNovo_contig_221726	Quail_Scaffolded_DeNovo_contig_118580	1
Quail_Naked_DeNovo_contig_59691	Quail_Scaffolded_DeNovo_contig_118628	1
Quail_Naked_DeNovo_contig_128743	Quail_Scaffolded_DeNovo_contig_119077	1
Quail_Naked_DeNovo_contig_250445	Quail_Scaffolded_DeNovo_contig_119152	1
Quail_Naked_DeNovo_contig_337482	Quail_Scaffolded_DeNovo_contig_119247	374
Quail_Naked_DeNovo_contig_139400	Quail_Scaffolded_DeNovo_contig_119333	1
Quail_Naked_DeNovo_contig_72862	Quail_Scaffolded_DeNovo_contig_119402	119
Quail_Naked_DeNovo_contig_202258	Quail_Scaffolded_DeNovo_contig_119582	1
Quail_Naked_DeNovo_contig_262755	Quail_Scaffolded_DeNovo_contig_119909	1
Quail_Naked_DeNovo_contig_346781	Quail_Scaffolded_DeNovo_contig_119973	1
Quail_Naked_DeNovo_contig_216412	Quail_Scaffolded_DeNovo_contig_120003	1
Quail_Naked_DeNovo_contig_257677	Quail_Scaffolded_DeNovo_contig_120082	1
Quail_Naked_DeNovo_contig_92092	Quail_Scaffolded_DeNovo_contig_120138	304
Quail_Naked_DeNovo_contig_175235	Quail_Scaffolded_DeNovo_contig_120189	1
Quail_Naked_DeNovo_contig_166059	Quail_Scaffolded_DeNovo_contig_120203	283
Quail_Naked_DeNovo_contig_157745	Quail_Scaffolded_DeNovo_contig_120208	350
Quail_Naked_DeNovo_contig_181950	Quail_Scaffolded_DeNovo_contig_120313	34
Quail_Naked_DeNovo_contig_252304	Quail_Scaffolded_DeNovo_contig_120706	1
Quail_Naked_DeNovo_contig_89084	Quail_Scaffolded_DeNovo_contig_120749	1
Quail_Naked_DeNovo_contig_166861	Quail_Scaffolded_DeNovo_contig_121152	1
Quail_Naked_DeNovo_contig_179373	Quail_Scaffolded_DeNovo_contig_121394	97
Quail_Naked_DeNovo_contig_156872	Quail_Scaffolded_DeNovo_contig_121571	1
Quail_Naked_DeNovo_contig_120336	Quail_Scaffolded_DeNovo_contig_121624	1
Quail_Naked_DeNovo_contig_168675	Quail_Scaffolded_DeNovo_contig_122138	1
Quail_Naked_DeNovo_contig_191511	Quail_Scaffolded_DeNovo_contig_122735	1
Quail_Naked_DeNovo_contig_74419	Quail_Scaffolded_DeNovo_contig_122952	94
Quail_Naked_DeNovo_contig_236273	Quail_Scaffolded_DeNovo_contig_123028	310
Quail_Naked_DeNovo_contig_143405	Quail_Scaffolded_DeNovo_contig_123080	4818
Quail_Naked_DeNovo_contig_127929	Quail_Scaffolded_DeNovo_contig_123182	1
Quail_Naked_DeNovo_contig_68756	Quail_Scaffolded_DeNovo_contig_124128	219
Quail_Naked_DeNovo_contig_193300	Quail_Scaffolded_DeNovo_contig_124197	90
Quail_Naked_DeNovo_contig_77801	Quail_Scaffolded_DeNovo_contig_124216	1
Quail_Naked_DeNovo_contig_233731	Quail_Scaffolded_DeNovo_contig_124354	1
Quail_Naked_DeNovo_contig_262663	Quail_Scaffolded_DeNovo_contig_124399	1
Quail_Naked_DeNovo_contig_260202	Quail_Scaffolded_DeNovo_contig_124519	1
Quail_Naked_DeNovo_contig_158342	Quail_Scaffolded_DeNovo_contig_124650	1
Quail_Naked_DeNovo_contig_268692	Quail_Scaffolded_DeNovo_contig_124786	1
Quail_Naked_DeNovo_contig_177106	Quail_Scaffolded_DeNovo_contig_124831	1
Quail_Naked_DeNovo_contig_69308	Quail_Scaffolded_DeNovo_contig_124878	1
Quail_Naked_DeNovo_contig_214446	Quail_Scaffolded_DeNovo_contig_124878	3141
Quail_Naked_DeNovo_contig_91165	Quail_Scaffolded_DeNovo_contig_124918	1
Quail_Naked_DeNovo_contig_139106	Quail_Scaffolded_DeNovo_contig_125003	1
Quail_Naked_DeNovo_contig_264950	Quail_Scaffolded_DeNovo_contig_125021	1
Quail_Naked_DeNovo_contig_281275	Quail_Scaffolded_DeNovo_contig_125028	15
Quail_Naked_DeNovo_contig_262860	Quail_Scaffolded_DeNovo_contig_125044	1
Quail_Naked_DeNovo_contig_207246	Quail_Scaffolded_DeNovo_contig_125134	1
Quail_Naked_DeNovo_contig_287032	Quail_Scaffolded_DeNovo_contig_125134	1
Quail_Naked_DeNovo_contig_167932	Quail_Scaffolded_DeNovo_contig_125138	1
Quail_Naked_DeNovo_contig_266884	Quail_Scaffolded_DeNovo_contig_125144	31
Quail_Naked_DeNovo_contig_109621	Quail_Scaffolded_DeNovo_contig_125146	1
Quail_Naked_DeNovo_contig_126246	Quail_Scaffolded_DeNovo_contig_125237	1
Quail_Naked_DeNovo_contig_261697	Quail_Scaffolded_DeNovo_contig_125784	1
Quail_Naked_DeNovo_contig_126555	Quail_Scaffolded_DeNovo_contig_125925	1
Quail_Naked_DeNovo_contig_336130	Quail_Scaffolded_DeNovo_contig_126042	5322
Quail_Naked_DeNovo_contig_276343	Quail_Scaffolded_DeNovo_contig_126133	512
Quail_Naked_DeNovo_contig_331596	Quail_Scaffolded_DeNovo_contig_126193	5077
Quail_Naked_DeNovo_contig_229595	Quail_Scaffolded_DeNovo_contig_126194	1
Quail_Naked_DeNovo_contig_82964	Quail_Scaffolded_DeNovo_contig_126377	1
Quail_Naked_DeNovo_contig_185635	Quail_Scaffolded_DeNovo_contig_126648	1
Quail_Naked_DeNovo_contig_204546	Quail_Scaffolded_DeNovo_contig_126768	1
Quail_Naked_DeNovo_contig_146330	Quail_Scaffolded_DeNovo_contig_127038	1
Quail_Naked_DeNovo_contig_145140	Quail_Scaffolded_DeNovo_contig_127204	1
Quail_Naked_DeNovo_contig_42844	Quail_Scaffolded_DeNovo_contig_127263	1
Quail_Naked_DeNovo_contig_278937	Quail_Scaffolded_DeNovo_contig_127332	1
Quail_Naked_DeNovo_contig_264209	Quail_Scaffolded_DeNovo_contig_127488	151
Quail_Naked_DeNovo_contig_194560	Quail_Scaffolded_DeNovo_contig_127509	1
Quail_Naked_DeNovo_contig_77624	Quail_Scaffolded_DeNovo_contig_127515	1
Quail_Naked_DeNovo_contig_8135	Quail_Scaffolded_DeNovo_contig_127672	1
Quail_Naked_DeNovo_contig_232260	Quail_Scaffolded_DeNovo_contig_127714	2744
Quail_Naked_DeNovo_contig_131497	Quail_Scaffolded_DeNovo_contig_127823	2183
Quail_Naked_DeNovo_contig_323087	Quail_Scaffolded_DeNovo_contig_128225	428
Quail_Naked_DeNovo_contig_18493	Quail_Scaffolded_DeNovo_contig_128425	1
Quail_Naked_DeNovo_contig_169053	Quail_Scaffolded_DeNovo_contig_128665	1
Quail_Naked_DeNovo_contig_123474	Quail_Scaffolded_DeNovo_contig_128833	1
Quail_Naked_DeNovo_contig_181323	Quail_Scaffolded_DeNovo_contig_128870	1
Quail_Naked_DeNovo_contig_65998	Quail_Scaffolded_DeNovo_contig_129426	1966
Quail_Naked_DeNovo_contig_20314	Quail_Scaffolded_DeNovo_contig_129575	1
Quail_Naked_DeNovo_contig_47004	Quail_Scaffolded_DeNovo_contig_130304	7
Quail_Naked_DeNovo_contig_165299	Quail_Scaffolded_DeNovo_contig_130347	1
Quail_Naked_DeNovo_contig_47675	Quail_Scaffolded_DeNovo_contig_130410	1519
Quail_Naked_DeNovo_contig_47674	Quail_Scaffolded_DeNovo_contig_130410	7469
Quail_Naked_DeNovo_contig_108717	Quail_Scaffolded_DeNovo_contig_130419	1
Quail_Naked_DeNovo_contig_234592	Quail_Scaffolded_DeNovo_contig_130472	1
Quail_Naked_DeNovo_contig_257574	Quail_Scaffolded_DeNovo_contig_130472	118
Quail_Naked_DeNovo_contig_180084	Quail_Scaffolded_DeNovo_contig_130539	1
Quail_Naked_DeNovo_contig_239466	Quail_Scaffolded_DeNovo_contig_130582	1
Quail_Naked_DeNovo_contig_179998	Quail_Scaffolded_DeNovo_contig_130592	168
Quail_Naked_DeNovo_contig_41960	Quail_Scaffolded_DeNovo_contig_130927	1
Quail_Naked_DeNovo_contig_192898	Quail_Scaffolded_DeNovo_contig_131137	1
Quail_Naked_DeNovo_contig_89191	Quail_Scaffolded_DeNovo_contig_132207	1
Quail_Naked_DeNovo_contig_231368	Quail_Scaffolded_DeNovo_contig_132265	115
Quail_Naked_DeNovo_contig_233256	Quail_Scaffolded_DeNovo_contig_132336	1
Quail_Naked_DeNovo_contig_146769	Quail_Scaffolded_DeNovo_contig_132393	1
Quail_Naked_DeNovo_contig_266576	Quail_Scaffolded_DeNovo_contig_132466	1
Quail_Naked_DeNovo_contig_25650	Quail_Scaffolded_DeNovo_contig_132843	1
Quail_Naked_DeNovo_contig_142208	Quail_Scaffolded_DeNovo_contig_132853	11
Quail_Naked_DeNovo_contig_18718	Quail_Scaffolded_DeNovo_contig_132868	1
Quail_Naked_DeNovo_contig_56076	Quail_Scaffolded_DeNovo_contig_133064	131
Quail_Naked_DeNovo_contig_23991	Quail_Scaffolded_DeNovo_contig_133181	1
Quail_Naked_DeNovo_contig_112225	Quail_Scaffolded_DeNovo_contig_133391	1
Quail_Naked_DeNovo_contig_133828	Quail_Scaffolded_DeNovo_contig_133505	1
Quail_Naked_DeNovo_contig_212328	Quail_Scaffolded_DeNovo_contig_133789	1
Quail_Naked_DeNovo_contig_279197	Quail_Scaffolded_DeNovo_contig_133805	1
Quail_Naked_DeNovo_contig_119192	Quail_Scaffolded_DeNovo_contig_133891	1
Quail_Naked_DeNovo_contig_184081	Quail_Scaffolded_DeNovo_contig_133902	1
Quail_Naked_DeNovo_contig_344558	Quail_Scaffolded_DeNovo_contig_134085	14
Quail_Naked_DeNovo_contig_4180	Quail_Scaffolded_DeNovo_contig_134196	1
Quail_Naked_DeNovo_contig_172182	Quail_Scaffolded_DeNovo_contig_134270	1
Quail_Naked_DeNovo_contig_154494	Quail_Scaffolded_DeNovo_contig_134329	1
Quail_Naked_DeNovo_contig_64009	Quail_Scaffolded_DeNovo_contig_134441	1
Quail_Naked_DeNovo_contig_242304	Quail_Scaffolded_DeNovo_contig_134563	1
Quail_Naked_DeNovo_contig_270279	Quail_Scaffolded_DeNovo_contig_134670	3
Quail_Naked_DeNovo_contig_267878	Quail_Scaffolded_DeNovo_contig_134696	1
Quail_Naked_DeNovo_contig_305822	Quail_Scaffolded_DeNovo_contig_134889	188
Quail_Naked_DeNovo_contig_52463	Quail_Scaffolded_DeNovo_contig_134943	672
Quail_Naked_DeNovo_contig_253577	Quail_Scaffolded_DeNovo_contig_135298	1
Quail_Naked_DeNovo_contig_276335	Quail_Scaffolded_DeNovo_contig_135423	1
Quail_Naked_DeNovo_contig_283418	Quail_Scaffolded_DeNovo_contig_135584	1
Quail_Naked_DeNovo_contig_238340	Quail_Scaffolded_DeNovo_contig_135626	1
Quail_Naked_DeNovo_contig_188189	Quail_Scaffolded_DeNovo_contig_135639	1
Quail_Naked_DeNovo_contig_56955	Quail_Scaffolded_DeNovo_contig_135763	1
Quail_Naked_DeNovo_contig_132910	Quail_Scaffolded_DeNovo_contig_135781	37
Quail_Naked_DeNovo_contig_279798	Quail_Scaffolded_DeNovo_contig_135784	1
Quail_Naked_DeNovo_contig_245610	Quail_Scaffolded_DeNovo_contig_135846	1
Quail_Naked_DeNovo_contig_255877	Quail_Scaffolded_DeNovo_contig_136221	1
Quail_Naked_DeNovo_contig_84061	Quail_Scaffolded_DeNovo_contig_136336	1
Quail_Naked_DeNovo_contig_172943	Quail_Scaffolded_DeNovo_contig_136348	1
Quail_Naked_DeNovo_contig_121774	Quail_Scaffolded_DeNovo_contig_136501	1
Quail_Naked_DeNovo_contig_69859	Quail_Scaffolded_DeNovo_contig_136631	1
Quail_Naked_DeNovo_contig_258270	Quail_Scaffolded_DeNovo_contig_136836	1
Quail_Naked_DeNovo_contig_172187	Quail_Scaffolded_DeNovo_contig_137132	1
Quail_Naked_DeNovo_contig_272742	Quail_Scaffolded_DeNovo_contig_137144	1
Quail_Naked_DeNovo_contig_135891	Quail_Scaffolded_DeNovo_contig_137290	1
Quail_Naked_DeNovo_contig_242787	Quail_Scaffolded_DeNovo_contig_137423	1
Quail_Naked_DeNovo_contig_252035	Quail_Scaffolded_DeNovo_contig_137427	1
Quail_Naked_DeNovo_contig_65331	Quail_Scaffolded_DeNovo_contig_137763	1
Quail_Naked_DeNovo_contig_285814	Quail_Scaffolded_DeNovo_contig_137792	1
Quail_Naked_DeNovo_contig_219405	Quail_Scaffolded_DeNovo_contig_138194	1
Quail_Naked_DeNovo_contig_273003	Quail_Scaffolded_DeNovo_contig_138225	1
Quail_Naked_DeNovo_contig_274471	Quail_Scaffolded_DeNovo_contig_138863	1
Quail_Naked_DeNovo_contig_252852	Quail_Scaffolded_DeNovo_contig_138983	1
Quail_Naked_DeNovo_contig_225582	Quail_Scaffolded_DeNovo_contig_139281	450
Quail_Naked_DeNovo_contig_284165	Quail_Scaffolded_DeNovo_contig_140017	1
Quail_Naked_DeNovo_contig_285010	Quail_Scaffolded_DeNovo_contig_140137	1
Quail_Naked_DeNovo_contig_266834	Quail_Scaffolded_DeNovo_contig_140148	1
Quail_Naked_DeNovo_contig_177016	Quail_Scaffolded_DeNovo_contig_140196	1
Quail_Naked_DeNovo_contig_220568	Quail_Scaffolded_DeNovo_contig_140320	1
Quail_Naked_DeNovo_contig_285941	Quail_Scaffolded_DeNovo_contig_140444	43
Quail_Naked_DeNovo_contig_197611	Quail_Scaffolded_DeNovo_contig_140803	29
Quail_Naked_DeNovo_contig_331108	Quail_Scaffolded_DeNovo_contig_140812	1
Quail_Naked_DeNovo_contig_203752	Quail_Scaffolded_DeNovo_contig_140882	1
Quail_Naked_DeNovo_contig_294353	Quail_Scaffolded_DeNovo_contig_141035	404
Quail_Naked_DeNovo_contig_111262	Quail_Scaffolded_DeNovo_contig_141561	1
Quail_Naked_DeNovo_contig_219306	Quail_Scaffolded_DeNovo_contig_141580	1
Quail_Naked_DeNovo_contig_83038	Quail_Scaffolded_DeNovo_contig_141596	33
Quail_Naked_DeNovo_contig_268512	Quail_Scaffolded_DeNovo_contig_141665	1
Quail_Naked_DeNovo_contig_240861	Quail_Scaffolded_DeNovo_contig_142515	1
Quail_Naked_DeNovo_contig_40819	Quail_Scaffolded_DeNovo_contig_142741	1
Quail_Naked_DeNovo_contig_268849	Quail_Scaffolded_DeNovo_contig_142860	119
Quail_Naked_DeNovo_contig_212637	Quail_Scaffolded_DeNovo_contig_142932	1
Quail_Naked_DeNovo_contig_208467	Quail_Scaffolded_DeNovo_contig_143060	4
Quail_Naked_DeNovo_contig_193190	Quail_Scaffolded_DeNovo_contig_143446	1
Quail_Naked_DeNovo_contig_276921	Quail_Scaffolded_DeNovo_contig_143467	1
Quail_Naked_DeNovo_contig_295327	Quail_Scaffolded_DeNovo_contig_143916	72
Quail_Naked_DeNovo_contig_128638	Quail_Scaffolded_DeNovo_contig_144146	1
Quail_Naked_DeNovo_contig_134302	Quail_Scaffolded_DeNovo_contig_144275	68
Quail_Naked_DeNovo_contig_289121	Quail_Scaffolded_DeNovo_contig_144282	1
Quail_Naked_DeNovo_contig_53504	Quail_Scaffolded_DeNovo_contig_144412	41
Quail_Naked_DeNovo_contig_261706	Quail_Scaffolded_DeNovo_contig_144658	1
Quail_Naked_DeNovo_contig_34128	Quail_Scaffolded_DeNovo_contig_144671	5520
Quail_Naked_DeNovo_contig_257951	Quail_Scaffolded_DeNovo_contig_144738	1
Quail_Naked_DeNovo_contig_182810	Quail_Scaffolded_DeNovo_contig_144860	4
Quail_Naked_DeNovo_contig_278791	Quail_Scaffolded_DeNovo_contig_144962	1
Quail_Naked_DeNovo_contig_289159	Quail_Scaffolded_DeNovo_contig_145371	1
Quail_Naked_DeNovo_contig_226731	Quail_Scaffolded_DeNovo_contig_145457	1
Quail_Naked_DeNovo_contig_163907	Quail_Scaffolded_DeNovo_contig_145569	1
Quail_Naked_DeNovo_contig_118250	Quail_Scaffolded_DeNovo_contig_145731	1
Quail_Naked_DeNovo_contig_213657	Quail_Scaffolded_DeNovo_contig_145813	274
Quail_Naked_DeNovo_contig_20020	Quail_Scaffolded_DeNovo_contig_145857	1
Quail_Naked_DeNovo_contig_284687	Quail_Scaffolded_DeNovo_contig_146256	1
Quail_Naked_DeNovo_contig_279719	Quail_Scaffolded_DeNovo_contig_146258	1
Quail_Naked_DeNovo_contig_231977	Quail_Scaffolded_DeNovo_contig_146287	1
Quail_Naked_DeNovo_contig_262756	Quail_Scaffolded_DeNovo_contig_146331	1
Quail_Naked_DeNovo_contig_174431	Quail_Scaffolded_DeNovo_contig_146495	1
Quail_Naked_DeNovo_contig_227433	Quail_Scaffolded_DeNovo_contig_146796	38
Quail_Naked_DeNovo_contig_293408	Quail_Scaffolded_DeNovo_contig_146908	1
Quail_Naked_DeNovo_contig_80981	Quail_Scaffolded_DeNovo_contig_146994	5642
Quail_Naked_DeNovo_contig_233921	Quail_Scaffolded_DeNovo_contig_147079	221
Quail_Naked_DeNovo_contig_92606	Quail_Scaffolded_DeNovo_contig_147109	1
Quail_Naked_DeNovo_contig_12627	Quail_Scaffolded_DeNovo_contig_147187	1
Quail_Naked_DeNovo_contig_163942	Quail_Scaffolded_DeNovo_contig_147253	1
Quail_Naked_DeNovo_contig_69990	Quail_Scaffolded_DeNovo_contig_147422	1
Quail_Naked_DeNovo_contig_151196	Quail_Scaffolded_DeNovo_contig_147558	1
Quail_Naked_DeNovo_contig_265103	Quail_Scaffolded_DeNovo_contig_147563	193
Quail_Naked_DeNovo_contig_294746	Quail_Scaffolded_DeNovo_contig_147585	1
Quail_Naked_DeNovo_contig_124863	Quail_Scaffolded_DeNovo_contig_147918	1
Quail_Naked_DeNovo_contig_207753	Quail_Scaffolded_DeNovo_contig_148097	4744
Quail_Naked_DeNovo_contig_210403	Quail_Scaffolded_DeNovo_contig_148240	1
Quail_Naked_DeNovo_contig_275363	Quail_Scaffolded_DeNovo_contig_148342	1
Quail_Naked_DeNovo_contig_8361	Quail_Scaffolded_DeNovo_contig_148523	1
Quail_Naked_DeNovo_contig_8308	Quail_Scaffolded_DeNovo_contig_148661	1
Quail_Naked_DeNovo_contig_131462	Quail_Scaffolded_DeNovo_contig_148813	2408
Quail_Naked_DeNovo_contig_220380	Quail_Scaffolded_DeNovo_contig_149013	1
Quail_Naked_DeNovo_contig_266634	Quail_Scaffolded_DeNovo_contig_149066	1
Quail_Naked_DeNovo_contig_14785	Quail_Scaffolded_DeNovo_contig_149174	1
Quail_Naked_DeNovo_contig_232950	Quail_Scaffolded_DeNovo_contig_149182	1
Quail_Naked_DeNovo_contig_264446	Quail_Scaffolded_DeNovo_contig_149312	1
Quail_Naked_DeNovo_contig_289670	Quail_Scaffolded_DeNovo_contig_149524	1
Quail_Naked_DeNovo_contig_143643	Quail_Scaffolded_DeNovo_contig_149558	1
Quail_Naked_DeNovo_contig_171575	Quail_Scaffolded_DeNovo_contig_149690	1
Quail_Naked_DeNovo_contig_242877	Quail_Scaffolded_DeNovo_contig_149890	1
Quail_Naked_DeNovo_contig_240678	Quail_Scaffolded_DeNovo_contig_150143	1
Quail_Naked_DeNovo_contig_232977	Quail_Scaffolded_DeNovo_contig_150316	1
Quail_Naked_DeNovo_contig_245499	Quail_Scaffolded_DeNovo_contig_150369	1
Quail_Naked_DeNovo_contig_302144	Quail_Scaffolded_DeNovo_contig_150538	1
Quail_Naked_DeNovo_contig_172459	Quail_Scaffolded_DeNovo_contig_150688	1
Quail_Naked_DeNovo_contig_63411	Quail_Scaffolded_DeNovo_contig_150709	74
Quail_Naked_DeNovo_contig_103116	Quail_Scaffolded_DeNovo_contig_151087	1
Quail_Naked_DeNovo_contig_294037	Quail_Scaffolded_DeNovo_contig_151147	1
Quail_Naked_DeNovo_contig_243300	Quail_Scaffolded_DeNovo_contig_151170	1
Quail_Naked_DeNovo_contig_166963	Quail_Scaffolded_DeNovo_contig_151391	1
Quail_Naked_DeNovo_contig_244271	Quail_Scaffolded_DeNovo_contig_151446	1
Quail_Naked_DeNovo_contig_229235	Quail_Scaffolded_DeNovo_contig_151468	264
Quail_Naked_DeNovo_contig_24105	Quail_Scaffolded_DeNovo_contig_151533	1
Quail_Naked_DeNovo_contig_62478	Quail_Scaffolded_DeNovo_contig_151614	205
Quail_Naked_DeNovo_contig_61674	Quail_Scaffolded_DeNovo_contig_151745	1
Quail_Naked_DeNovo_contig_169228	Quail_Scaffolded_DeNovo_contig_151802	1
Quail_Naked_DeNovo_contig_35171	Quail_Scaffolded_DeNovo_contig_152048	1
Quail_Naked_DeNovo_contig_85521	Quail_Scaffolded_DeNovo_contig_152162	1
Quail_Naked_DeNovo_contig_151608	Quail_Scaffolded_DeNovo_contig_152282	2188
Quail_Naked_DeNovo_contig_38063	Quail_Scaffolded_DeNovo_contig_152374	1
Quail_Naked_DeNovo_contig_193423	Quail_Scaffolded_DeNovo_contig_152416	1
Quail_Naked_DeNovo_contig_289404	Quail_Scaffolded_DeNovo_contig_152468	1
Quail_Naked_DeNovo_contig_268971	Quail_Scaffolded_DeNovo_contig_152479	1
Quail_Naked_DeNovo_contig_321540	Quail_Scaffolded_DeNovo_contig_152554	1
Quail_Naked_DeNovo_contig_19842	Quail_Scaffolded_DeNovo_contig_152575	22
Quail_Naked_DeNovo_contig_270458	Quail_Scaffolded_DeNovo_contig_152575	26
Quail_Naked_DeNovo_contig_223592	Quail_Scaffolded_DeNovo_contig_152706	1
Quail_Naked_DeNovo_contig_286822	Quail_Scaffolded_DeNovo_contig_152770	1
Quail_Naked_DeNovo_contig_226059	Quail_Scaffolded_DeNovo_contig_152857	1
Quail_Naked_DeNovo_contig_258294	Quail_Scaffolded_DeNovo_contig_152946	135
Quail_Naked_DeNovo_contig_185052	Quail_Scaffolded_DeNovo_contig_153005	1
Quail_Naked_DeNovo_contig_218695	Quail_Scaffolded_DeNovo_contig_153439	1
Quail_Naked_DeNovo_contig_19751	Quail_Scaffolded_DeNovo_contig_153457	1
Quail_Naked_DeNovo_contig_339608	Quail_Scaffolded_DeNovo_contig_153490	1
Quail_Naked_DeNovo_contig_188561	Quail_Scaffolded_DeNovo_contig_153583	1
Quail_Naked_DeNovo_contig_260015	Quail_Scaffolded_DeNovo_contig_153647	1
Quail_Naked_DeNovo_contig_197708	Quail_Scaffolded_DeNovo_contig_153700	1
Quail_Naked_DeNovo_contig_305531	Quail_Scaffolded_DeNovo_contig_153809	1
Quail_Naked_DeNovo_contig_253220	Quail_Scaffolded_DeNovo_contig_154207	1
Quail_Naked_DeNovo_contig_224384	Quail_Scaffolded_DeNovo_contig_154341	1
Quail_Naked_DeNovo_contig_152898	Quail_Scaffolded_DeNovo_contig_154372	1
Quail_Naked_DeNovo_contig_184557	Quail_Scaffolded_DeNovo_contig_154382	1
Quail_Naked_DeNovo_contig_227185	Quail_Scaffolded_DeNovo_contig_154408	541
Quail_Naked_DeNovo_contig_248687	Quail_Scaffolded_DeNovo_contig_154814	1
Quail_Naked_DeNovo_contig_71460	Quail_Scaffolded_DeNovo_contig_155103	1
Quail_Naked_DeNovo_contig_176638	Quail_Scaffolded_DeNovo_contig_155214	1
Quail_Naked_DeNovo_contig_216383	Quail_Scaffolded_DeNovo_contig_155259	1
Quail_Naked_DeNovo_contig_48524	Quail_Scaffolded_DeNovo_contig_155322	1
Quail_Naked_DeNovo_contig_283876	Quail_Scaffolded_DeNovo_contig_155390	1
Quail_Naked_DeNovo_contig_343628	Quail_Scaffolded_DeNovo_contig_155399	33
Quail_Naked_DeNovo_contig_69882	Quail_Scaffolded_DeNovo_contig_155901	197
Quail_Naked_DeNovo_contig_243483	Quail_Scaffolded_DeNovo_contig_156493	1
Quail_Naked_DeNovo_contig_315374	Quail_Scaffolded_DeNovo_contig_156524	526
Quail_Naked_DeNovo_contig_300475	Quail_Scaffolded_DeNovo_contig_156648	1
Quail_Naked_DeNovo_contig_124487	Quail_Scaffolded_DeNovo_contig_156842	1
Quail_Naked_DeNovo_contig_41218	Quail_Scaffolded_DeNovo_contig_157257	1
Quail_Naked_DeNovo_contig_108441	Quail_Scaffolded_DeNovo_contig_157706	1
Quail_Naked_DeNovo_contig_328079	Quail_Scaffolded_DeNovo_contig_157807	13
Quail_Naked_DeNovo_contig_271684	Quail_Scaffolded_DeNovo_contig_157836	78
Quail_Naked_DeNovo_contig_252409	Quail_Scaffolded_DeNovo_contig_157838	1
Quail_Naked_DeNovo_contig_52694	Quail_Scaffolded_DeNovo_contig_158173	1
Quail_Naked_DeNovo_contig_192857	Quail_Scaffolded_DeNovo_contig_158694	1
Quail_Naked_DeNovo_contig_308757	Quail_Scaffolded_DeNovo_contig_158746	1
Quail_Naked_DeNovo_contig_171779	Quail_Scaffolded_DeNovo_contig_159197	1
Quail_Naked_DeNovo_contig_220759	Quail_Scaffolded_DeNovo_contig_159261	1
Quail_Naked_DeNovo_contig_186139	Quail_Scaffolded_DeNovo_contig_159573	1
Quail_Naked_DeNovo_contig_223296	Quail_Scaffolded_DeNovo_contig_159633	147
Quail_Naked_DeNovo_contig_97007	Quail_Scaffolded_DeNovo_contig_160079	1
Quail_Naked_DeNovo_contig_203228	Quail_Scaffolded_DeNovo_contig_160319	1
Quail_Naked_DeNovo_contig_268293	Quail_Scaffolded_DeNovo_contig_160510	1
Quail_Naked_DeNovo_contig_96426	Quail_Scaffolded_DeNovo_contig_161829	1
Quail_Naked_DeNovo_contig_192486	Quail_Scaffolded_DeNovo_contig_161850	1
Quail_Naked_DeNovo_contig_249112	Quail_Scaffolded_DeNovo_contig_162049	1
Quail_Naked_DeNovo_contig_191534	Quail_Scaffolded_DeNovo_contig_162073	1
Quail_Naked_DeNovo_contig_255771	Quail_Scaffolded_DeNovo_contig_162123	1
Quail_Naked_DeNovo_contig_44619	Quail_Scaffolded_DeNovo_contig_162366	1
Quail_Naked_DeNovo_contig_244200	Quail_Scaffolded_DeNovo_contig_162775	1
Quail_Naked_DeNovo_contig_222825	Quail_Scaffolded_DeNovo_contig_162826	1
Quail_Naked_DeNovo_contig_244484	Quail_Scaffolded_DeNovo_contig_162967	1
Quail_Naked_DeNovo_contig_150657	Quail_Scaffolded_DeNovo_contig_163160	1
Quail_Naked_DeNovo_contig_168296	Quail_Scaffolded_DeNovo_contig_163178	1
Quail_Naked_DeNovo_contig_353580	Quail_Scaffolded_DeNovo_contig_163571	283
Quail_Naked_DeNovo_contig_262582	Quail_Scaffolded_DeNovo_contig_164300	1
Quail_Naked_DeNovo_contig_296418	Quail_Scaffolded_DeNovo_contig_164406	1
Quail_Naked_DeNovo_contig_236551	Quail_Scaffolded_DeNovo_contig_165002	1
Quail_Naked_DeNovo_contig_154203	Quail_Scaffolded_DeNovo_contig_165188	1
Quail_Naked_DeNovo_contig_266126	Quail_Scaffolded_DeNovo_contig_165388	1
Quail_Naked_DeNovo_contig_185777	Quail_Scaffolded_DeNovo_contig_165552	1
Quail_Naked_DeNovo_contig_282301	Quail_Scaffolded_DeNovo_contig_165982	247
Quail_Naked_DeNovo_contig_310591	Quail_Scaffolded_DeNovo_contig_165994	246
Quail_Naked_DeNovo_contig_203293	Quail_Scaffolded_DeNovo_contig_166212	1
Quail_Naked_DeNovo_contig_230222	Quail_Scaffolded_DeNovo_contig_166325	1
Quail_Naked_DeNovo_contig_3398	Quail_Scaffolded_DeNovo_contig_166501	16
Quail_Naked_DeNovo_contig_300628	Quail_Scaffolded_DeNovo_contig_166655	1
Quail_Naked_DeNovo_contig_238927	Quail_Scaffolded_DeNovo_contig_166761	1
Quail_Naked_DeNovo_contig_257916	Quail_Scaffolded_DeNovo_contig_166800	1
Quail_Naked_DeNovo_contig_268191	Quail_Scaffolded_DeNovo_contig_166917	1
Quail_Naked_DeNovo_contig_269467	Quail_Scaffolded_DeNovo_contig_166970	282
Quail_Naked_DeNovo_contig_336317	Quail_Scaffolded_DeNovo_contig_166970	306
Quail_Naked_DeNovo_contig_148747	Quail_Scaffolded_DeNovo_contig_166993	1
Quail_Naked_DeNovo_contig_262601	Quail_Scaffolded_DeNovo_contig_167028	1
Quail_Naked_DeNovo_contig_109565	Quail_Scaffolded_DeNovo_contig_167314	1
Quail_Naked_DeNovo_contig_315297	Quail_Scaffolded_DeNovo_contig_168050	1
Quail_Naked_DeNovo_contig_242631	Quail_Scaffolded_DeNovo_contig_168170	1
Quail_Naked_DeNovo_contig_239683	Quail_Scaffolded_DeNovo_contig_168279	1
Quail_Naked_DeNovo_contig_275092	Quail_Scaffolded_DeNovo_contig_168416	1
Quail_Naked_DeNovo_contig_185643	Quail_Scaffolded_DeNovo_contig_168463	1
Quail_Naked_DeNovo_contig_124192	Quail_Scaffolded_DeNovo_contig_168670	1
Quail_Naked_DeNovo_contig_274906	Quail_Scaffolded_DeNovo_contig_168695	2692
Quail_Naked_DeNovo_contig_311188	Quail_Scaffolded_DeNovo_contig_168755	1
Quail_Naked_DeNovo_contig_105119	Quail_Scaffolded_DeNovo_contig_168950	1
Quail_Naked_DeNovo_contig_123144	Quail_Scaffolded_DeNovo_contig_169168	1
Quail_Naked_DeNovo_contig_231872	Quail_Scaffolded_DeNovo_contig_169169	1
Quail_Naked_DeNovo_contig_133600	Quail_Scaffolded_DeNovo_contig_169253	1
Quail_Naked_DeNovo_contig_77623	Quail_Scaffolded_DeNovo_contig_169287	1
Quail_Naked_DeNovo_contig_154256	Quail_Scaffolded_DeNovo_contig_169337	1
Quail_Naked_DeNovo_contig_151311	Quail_Scaffolded_DeNovo_contig_169571	1
Quail_Naked_DeNovo_contig_160196	Quail_Scaffolded_DeNovo_contig_169702	1
Quail_Naked_DeNovo_contig_221408	Quail_Scaffolded_DeNovo_contig_169792	1
Quail_Naked_DeNovo_contig_276634	Quail_Scaffolded_DeNovo_contig_170066	1
Quail_Naked_DeNovo_contig_213019	Quail_Scaffolded_DeNovo_contig_170116	1
Quail_Naked_DeNovo_contig_320190	Quail_Scaffolded_DeNovo_contig_170136	1
Quail_Naked_DeNovo_contig_219965	Quail_Scaffolded_DeNovo_contig_170559	1
Quail_Naked_DeNovo_contig_327378	Quail_Scaffolded_DeNovo_contig_170712	1
Quail_Naked_DeNovo_contig_196874	Quail_Scaffolded_DeNovo_contig_171034	1
Quail_Naked_DeNovo_contig_130751	Quail_Scaffolded_DeNovo_contig_171141	1
Quail_Naked_DeNovo_contig_265639	Quail_Scaffolded_DeNovo_contig_171327	1
Quail_Naked_DeNovo_contig_108817	Quail_Scaffolded_DeNovo_contig_171409	1
Quail_Naked_DeNovo_contig_7474	Quail_Scaffolded_DeNovo_contig_171832	1
Quail_Naked_DeNovo_contig_17423	Quail_Scaffolded_DeNovo_contig_171962	1
Quail_Naked_DeNovo_contig_164561	Quail_Scaffolded_DeNovo_contig_172077	1
Quail_Naked_DeNovo_contig_240116	Quail_Scaffolded_DeNovo_contig_172160	358
Quail_Naked_DeNovo_contig_20448	Quail_Scaffolded_DeNovo_contig_172524	1
Quail_Naked_DeNovo_contig_288151	Quail_Scaffolded_DeNovo_contig_172670	1
Quail_Naked_DeNovo_contig_141373	Quail_Scaffolded_DeNovo_contig_172888	1
Quail_Naked_DeNovo_contig_314703	Quail_Scaffolded_DeNovo_contig_173505	1
Quail_Naked_DeNovo_contig_364969	Quail_Scaffolded_DeNovo_contig_173591	161
Quail_Naked_DeNovo_contig_115263	Quail_Scaffolded_DeNovo_contig_173630	1
Quail_Naked_DeNovo_contig_120885	Quail_Scaffolded_DeNovo_contig_173824	1
Quail_Naked_DeNovo_contig_238028	Quail_Scaffolded_DeNovo_contig_174086	1
Quail_Naked_DeNovo_contig_195774	Quail_Scaffolded_DeNovo_contig_174240	1
Quail_Naked_DeNovo_contig_246569	Quail_Scaffolded_DeNovo_contig_174761	1
Quail_Naked_DeNovo_contig_205792	Quail_Scaffolded_DeNovo_contig_174778	1
Quail_Naked_DeNovo_contig_242783	Quail_Scaffolded_DeNovo_contig_174884	249
Quail_Naked_DeNovo_contig_69992	Quail_Scaffolded_DeNovo_contig_175000	1
Quail_Naked_DeNovo_contig_284166	Quail_Scaffolded_DeNovo_contig_175133	1
Quail_Naked_DeNovo_contig_247889	Quail_Scaffolded_DeNovo_contig_175327	5214
Quail_Naked_DeNovo_contig_295082	Quail_Scaffolded_DeNovo_contig_175452	1
Quail_Naked_DeNovo_contig_300697	Quail_Scaffolded_DeNovo_contig_175615	1
Quail_Naked_DeNovo_contig_171199	Quail_Scaffolded_DeNovo_contig_175842	1
Quail_Naked_DeNovo_contig_340469	Quail_Scaffolded_DeNovo_contig_175856	1
Quail_Naked_DeNovo_contig_329956	Quail_Scaffolded_DeNovo_contig_178151	1
Quail_Naked_DeNovo_contig_84972	Quail_Scaffolded_DeNovo_contig_178602	1
Quail_Naked_DeNovo_contig_13758	Quail_Scaffolded_DeNovo_contig_178650	1
Quail_Naked_DeNovo_contig_94012	Quail_Scaffolded_DeNovo_contig_178988	1
Quail_Naked_DeNovo_contig_280553	Quail_Scaffolded_DeNovo_contig_179069	1
Quail_Naked_DeNovo_contig_330624	Quail_Scaffolded_DeNovo_contig_179873	1
Quail_Naked_DeNovo_contig_246161	Quail_Scaffolded_DeNovo_contig_180078	1
Quail_Naked_DeNovo_contig_284652	Quail_Scaffolded_DeNovo_contig_180338	11
Quail_Naked_DeNovo_contig_149931	Quail_Scaffolded_DeNovo_contig_180431	1
Quail_Naked_DeNovo_contig_232376	Quail_Scaffolded_DeNovo_contig_180486	1
Quail_Naked_DeNovo_contig_278841	Quail_Scaffolded_DeNovo_contig_180775	1
Quail_Naked_DeNovo_contig_205212	Quail_Scaffolded_DeNovo_contig_181036	1
Quail_Naked_DeNovo_contig_236872	Quail_Scaffolded_DeNovo_contig_181262	1
Quail_Naked_DeNovo_contig_321008	Quail_Scaffolded_DeNovo_contig_181679	1
Quail_Naked_DeNovo_contig_63764	Quail_Scaffolded_DeNovo_contig_181783	483
Quail_Naked_DeNovo_contig_272170	Quail_Scaffolded_DeNovo_contig_181946	1
Quail_Naked_DeNovo_contig_152310	Quail_Scaffolded_DeNovo_contig_182018	1
Quail_Naked_DeNovo_contig_316190	Quail_Scaffolded_DeNovo_contig_182151	1
Quail_Naked_DeNovo_contig_278191	Quail_Scaffolded_DeNovo_contig_182468	1
Quail_Naked_DeNovo_contig_27257	Quail_Scaffolded_DeNovo_contig_182481	1
Quail_Naked_DeNovo_contig_341144	Quail_Scaffolded_DeNovo_contig_182742	1
Quail_Naked_DeNovo_contig_49465	Quail_Scaffolded_DeNovo_contig_182934	1
Quail_Naked_DeNovo_contig_292830	Quail_Scaffolded_DeNovo_contig_183018	1
Quail_Naked_DeNovo_contig_132149	Quail_Scaffolded_DeNovo_contig_183379	1
Quail_Naked_DeNovo_contig_279550	Quail_Scaffolded_DeNovo_contig_183419	1
Quail_Naked_DeNovo_contig_335349	Quail_Scaffolded_DeNovo_contig_183848	1
Quail_Naked_DeNovo_contig_122329	Quail_Scaffolded_DeNovo_contig_183957	1
Quail_Naked_DeNovo_contig_202735	Quail_Scaffolded_DeNovo_contig_184212	2594
Quail_Naked_DeNovo_contig_127625	Quail_Scaffolded_DeNovo_contig_184277	1
Quail_Naked_DeNovo_contig_116187	Quail_Scaffolded_DeNovo_contig_184359	1
Quail_Naked_DeNovo_contig_339806	Quail_Scaffolded_DeNovo_contig_184631	879
Quail_Naked_DeNovo_contig_88311	Quail_Scaffolded_DeNovo_contig_184828	1
Quail_Naked_DeNovo_contig_203115	Quail_Scaffolded_DeNovo_contig_185014	1
Quail_Naked_DeNovo_contig_275774	Quail_Scaffolded_DeNovo_contig_185058	1
Quail_Naked_DeNovo_contig_207996	Quail_Scaffolded_DeNovo_contig_185278	1
Quail_Naked_DeNovo_contig_10615	Quail_Scaffolded_DeNovo_contig_185922	1
Quail_Naked_DeNovo_contig_345468	Quail_Scaffolded_DeNovo_contig_186184	2139
Quail_Naked_DeNovo_contig_224796	Quail_Scaffolded_DeNovo_contig_186256	1
Quail_Naked_DeNovo_contig_154616	Quail_Scaffolded_DeNovo_contig_186465	1
Quail_Naked_DeNovo_contig_111332	Quail_Scaffolded_DeNovo_contig_186565	1
Quail_Naked_DeNovo_contig_338782	Quail_Scaffolded_DeNovo_contig_186723	1
Quail_Naked_DeNovo_contig_154643	Quail_Scaffolded_DeNovo_contig_187601	1
Quail_Naked_DeNovo_contig_99837	Quail_Scaffolded_DeNovo_contig_187686	1
Quail_Naked_DeNovo_contig_229520	Quail_Scaffolded_DeNovo_contig_188057	1
Quail_Naked_DeNovo_contig_314983	Quail_Scaffolded_DeNovo_contig_188745	1
Quail_Naked_DeNovo_contig_284668	Quail_Scaffolded_DeNovo_contig_188979	1
Quail_Naked_DeNovo_contig_338688	Quail_Scaffolded_DeNovo_contig_189191	1
Quail_Naked_DeNovo_contig_156145	Quail_Scaffolded_DeNovo_contig_189411	137
Quail_Naked_DeNovo_contig_160004	Quail_Scaffolded_DeNovo_contig_189826	1
Quail_Naked_DeNovo_contig_125899	Quail_Scaffolded_DeNovo_contig_189872	1
Quail_Naked_DeNovo_contig_341933	Quail_Scaffolded_DeNovo_contig_190192	1
Quail_Naked_DeNovo_contig_201868	Quail_Scaffolded_DeNovo_contig_190236	1
Quail_Naked_DeNovo_contig_42843	Quail_Scaffolded_DeNovo_contig_190466	1
Quail_Naked_DeNovo_contig_278559	Quail_Scaffolded_DeNovo_contig_190544	1
Quail_Naked_DeNovo_contig_175359	Quail_Scaffolded_DeNovo_contig_190993	1
Quail_Naked_DeNovo_contig_343834	Quail_Scaffolded_DeNovo_contig_191385	1
Quail_Naked_DeNovo_contig_335485	Quail_Scaffolded_DeNovo_contig_191854	1
Quail_Naked_DeNovo_contig_301655	Quail_Scaffolded_DeNovo_contig_192385	1
Quail_Naked_DeNovo_contig_255022	Quail_Scaffolded_DeNovo_contig_192420	1
Quail_Naked_DeNovo_contig_293143	Quail_Scaffolded_DeNovo_contig_192607	1
Quail_Naked_DeNovo_contig_300622	Quail_Scaffolded_DeNovo_contig_192715	1
Quail_Naked_DeNovo_contig_344646	Quail_Scaffolded_DeNovo_contig_192813	1
Quail_Naked_DeNovo_contig_9427	Quail_Scaffolded_DeNovo_contig_193040	1
Quail_Naked_DeNovo_contig_369344	Quail_Scaffolded_DeNovo_contig_193278	1
Quail_Naked_DeNovo_contig_187344	Quail_Scaffolded_DeNovo_contig_193820	1
Quail_Naked_DeNovo_contig_336718	Quail_Scaffolded_DeNovo_contig_193855	1
Quail_Naked_DeNovo_contig_320652	Quail_Scaffolded_DeNovo_contig_194033	1
Quail_Naked_DeNovo_contig_369115	Quail_Scaffolded_DeNovo_contig_194302	167
Quail_Naked_DeNovo_contig_307107	Quail_Scaffolded_DeNovo_contig_194387	1
Quail_Naked_DeNovo_contig_230302	Quail_Scaffolded_DeNovo_contig_194413	1
Quail_Naked_DeNovo_contig_346156	Quail_Scaffolded_DeNovo_contig_194451	1
Quail_Naked_DeNovo_contig_200930	Quail_Scaffolded_DeNovo_contig_195015	125
Quail_Naked_DeNovo_contig_239735	Quail_Scaffolded_DeNovo_contig_195195	1
Quail_Naked_DeNovo_contig_266496	Quail_Scaffolded_DeNovo_contig_195473	1
Quail_Naked_DeNovo_contig_184564	Quail_Scaffolded_DeNovo_contig_195543	1
Quail_Naked_DeNovo_contig_227378	Quail_Scaffolded_DeNovo_contig_195717	1
Quail_Naked_DeNovo_contig_189858	Quail_Scaffolded_DeNovo_contig_196104	1
Quail_Naked_DeNovo_contig_270433	Quail_Scaffolded_DeNovo_contig_196209	1
Quail_Naked_DeNovo_contig_242396	Quail_Scaffolded_DeNovo_contig_196457	1
Quail_Naked_DeNovo_contig_337597	Quail_Scaffolded_DeNovo_contig_196847	1
Quail_Naked_DeNovo_contig_101566	Quail_Scaffolded_DeNovo_contig_197512	1
Quail_Naked_DeNovo_contig_128162	Quail_Scaffolded_DeNovo_contig_197614	1
Quail_Naked_DeNovo_contig_249828	Quail_Scaffolded_DeNovo_contig_197914	1
Quail_Naked_DeNovo_contig_225459	Quail_Scaffolded_DeNovo_contig_198205	1
Quail_Naked_DeNovo_contig_139502	Quail_Scaffolded_DeNovo_contig_198390	1
Quail_Naked_DeNovo_contig_31347	Quail_Scaffolded_DeNovo_contig_198547	1
Quail_Naked_DeNovo_contig_258970	Quail_Scaffolded_DeNovo_contig_198843	1
Quail_Naked_DeNovo_contig_61424	Quail_Scaffolded_DeNovo_contig_198850	1
Quail_Naked_DeNovo_contig_250648	Quail_Scaffolded_DeNovo_contig_199339	1
Quail_Naked_DeNovo_contig_32193	Quail_Scaffolded_DeNovo_contig_199458	8
Quail_Naked_DeNovo_contig_38523	Quail_Scaffolded_DeNovo_contig_199561	1
Quail_Naked_DeNovo_contig_170719	Quail_Scaffolded_DeNovo_contig_199667	1
Quail_Naked_DeNovo_contig_251158	Quail_Scaffolded_DeNovo_contig_199981	1
Quail_Naked_DeNovo_contig_62199	Quail_Scaffolded_DeNovo_contig_200485	1
Quail_Naked_DeNovo_contig_24845	Quail_Scaffolded_DeNovo_contig_200957	1
Quail_Naked_DeNovo_contig_256169	Quail_Scaffolded_DeNovo_contig_201800	1
Quail_Naked_DeNovo_contig_184682	Quail_Scaffolded_DeNovo_contig_202160	1
Quail_Naked_DeNovo_contig_347592	Quail_Scaffolded_DeNovo_contig_202192	1
Quail_Naked_DeNovo_contig_265478	Quail_Scaffolded_DeNovo_contig_202410	1
Quail_Naked_DeNovo_contig_199108	Quail_Scaffolded_DeNovo_contig_203105	1
Quail_Naked_DeNovo_contig_176008	Quail_Scaffolded_DeNovo_contig_203404	1
Quail_Naked_DeNovo_contig_170856	Quail_Scaffolded_DeNovo_contig_203450	1
Quail_Naked_DeNovo_contig_295227	Quail_Scaffolded_DeNovo_contig_203866	1
Quail_Naked_DeNovo_contig_293258	Quail_Scaffolded_DeNovo_contig_205350	1
Quail_Naked_DeNovo_contig_356174	Quail_Scaffolded_DeNovo_contig_205633	193
Quail_Naked_DeNovo_contig_188029	Quail_Scaffolded_DeNovo_contig_205745	1
Quail_Naked_DeNovo_contig_88263	Quail_Scaffolded_DeNovo_contig_206707	1
Quail_Naked_DeNovo_contig_275693	Quail_Scaffolded_DeNovo_contig_207271	1
Quail_Naked_DeNovo_contig_243523	Quail_Scaffolded_DeNovo_contig_207709	1
Quail_Naked_DeNovo_contig_238512	Quail_Scaffolded_DeNovo_contig_207912	1
Quail_Naked_DeNovo_contig_214287	Quail_Scaffolded_DeNovo_contig_208103	1
Quail_Naked_DeNovo_contig_306539	Quail_Scaffolded_DeNovo_contig_208677	1
Quail_Naked_DeNovo_contig_362531	Quail_Scaffolded_DeNovo_contig_209069	1
Quail_Naked_DeNovo_contig_94133	Quail_Scaffolded_DeNovo_contig_209283	1
Quail_Naked_DeNovo_contig_285630	Quail_Scaffolded_DeNovo_contig_210044	1
Quail_Naked_DeNovo_contig_316219	Quail_Scaffolded_DeNovo_contig_210600	1
Quail_Naked_DeNovo_contig_277695	Quail_Scaffolded_DeNovo_contig_210677	1
Quail_Naked_DeNovo_contig_205788	Quail_Scaffolded_DeNovo_contig_210847	1
Quail_Naked_DeNovo_contig_271650	Quail_Scaffolded_DeNovo_contig_211749	1
Quail_Naked_DeNovo_contig_327821	Quail_Scaffolded_DeNovo_contig_213041	1
Quail_Naked_DeNovo_contig_184319	Quail_Scaffolded_DeNovo_contig_213440	1
Quail_Naked_DeNovo_contig_368247	Quail_Scaffolded_DeNovo_contig_213653	1
Quail_Naked_DeNovo_contig_331989	Quail_Scaffolded_DeNovo_contig_215097	1
Quail_Naked_DeNovo_contig_210929	Quail_Scaffolded_DeNovo_contig_215305	1
Quail_Naked_DeNovo_contig_294539	Quail_Scaffolded_DeNovo_contig_216222	1
Quail_Naked_DeNovo_contig_302477	Quail_Scaffolded_DeNovo_contig_216936	1
Quail_Naked_DeNovo_contig_287190	Quail_Scaffolded_DeNovo_contig_218068	1
Quail_Naked_DeNovo_contig_255523	Quail_Scaffolded_DeNovo_contig_219194	1
Quail_Naked_DeNovo_contig_21943	Quail_Scaffolded_DeNovo_contig_219402	1
Quail_Naked_DeNovo_contig_316228	Quail_Scaffolded_DeNovo_contig_219822	1
