# Supplementary material for: A Draft De Novo Genome Assembly for the Northern Bobwhite (Colinus virginianus) Reveals Evidence for a Rapid Decline in Effective Population Size Beginning in the Late Pleistocene
Source: PLoS One. 2014 Mar 12;9(3):e90240. doi: 10.1371/journal.pone.0090240 (PMC3951200; doi:10.1371/journal.pone.0090240)
Supplement: Table S2 — NB1.0 Comparative Genome Aligment to Chicken (S2a) and Zebra Finch (S2b). (XLSX) [file pone.0090240.s002.xlsx]

## Sheet: Chicken 4.0
Table S2-A NB1.0 Comparative Genome Aligment to Chicken
Query	Hit/Subject Chromosome (Gallus gallus 4.0)	% Identity	Align Length	Mismatches	Gaps	q-start	q-end	hit-start	hit-end	evalue	bitscore	Total hits	Single or Multi Chromosome
NorthernBobwhite_SimpleDeNovo_contig_316037	gi|358485511|ref|NC_006088.3_GGA1|	82.35	51	8	1	4	54	11661	11612	0.001	48.2	76	M
NorthernBobwhite_SimpleDeNovo_contig_147059	gi|358485511|ref|NC_006088.3_GGA1|	87.68	203	22	1	86	285	31323	31121	1e-64	251	1	S
NorthernBobwhite_SimpleDeNovo_contig_301543	gi|358485511|ref|NC_006088.3_GGA1|	77.7	148	24	3	367	507	32699	32554	4e-23	113	1	S
NorthernBobwhite_SimpleDeNovo_contig_325010	gi|358485511|ref|NC_006088.3_GGA1|	75.68	148	27	4	363	503	32699	32554	1e-17	95.1	1	S
NorthernBobwhite_SimpleDeNovo_contig_147058	gi|358485511|ref|NC_006088.3_GGA1|	74.42	563	110	8	1	552	33382	33921	7e-98	361	1	S
NorthernBobwhite_SimpleDeNovo_contig_55684	gi|358485511|ref|NC_006088.3_GGA1|	85.57	298	40	1	330	624	34648	34351	8e-92	342	1	S
NorthernBobwhite_SimpleDeNovo_contig_301542	gi|358485511|ref|NC_006088.3_GGA1|	81.9	652	82	5	1	632	35922	36557	0	654	1	S
NorthernBobwhite_SimpleDeNovo_contig_224634	gi|358485511|ref|NC_006088.3_GGA1|	70.31	458	118	9	113	557	37225	36773	1e-45	188	110	M
NorthernBobwhite_SimpleDeNovo_contig_166210	gi|358485511|ref|NC_006088.3_GGA1|	78.37	564	100	4	1	564	37256	36715	2e-130	470	298	M
NorthernBobwhite_SimpleDeNovo_contig_95808	gi|358485511|ref|NC_006088.3_GGA1|	76.6	1406	208	22	37	1363	44536	43173	0	1063	1	S
NorthernBobwhite_SimpleDeNovo_contig_255441	gi|358485511|ref|NC_006088.3_GGA1|	78.16	412	60	11	3	386	45901	46310	5e-84	315	1	S
NorthernBobwhite_SimpleDeNovo_contig_56560	gi|358485511|ref|NC_006088.3_GGA1|	74.89	1418	236	33	1	1324	45924	44533	0	911	1	S
NorthernBobwhite_SimpleDeNovo_contig_8313	gi|358485511|ref|NC_006088.3_GGA1|	76.49	1510	266	22	1	1463	49509	48042	0	1104	2	S
NorthernBobwhite_SimpleDeNovo_contig_247859	gi|358485511|ref|NC_006088.3_GGA1|	74.55	224	45	2	110	332	49697	49485	4e-34	149	18	M
NorthernBobwhite_SimpleDeNovo_contig_8314	gi|358485511|ref|NC_006088.3_GGA1|	79.22	2507	386	33	1	2400	50510	52988	0	2145	1	S
NorthernBobwhite_SimpleDeNovo_contig_184194	gi|358485511|ref|NC_006088.3_GGA1|	79.72	217	32	5	1	212	53205	52996	7e-44	181	858	M
NorthernBobwhite_SimpleDeNovo_contig_272596	gi|358485511|ref|NC_006088.3_GGA1|	78.94	1054	171	9	523	1567	54192	53181	0	906	2	S
NorthernBobwhite_SimpleDeNovo_contig_97230	gi|358485511|ref|NC_006088.3_GGA1|	81.81	797	94	12	128	887	56268	55486	0	776	1	S
NorthernBobwhite_SimpleDeNovo_contig_280729	gi|358485511|ref|NC_006088.3_GGA1|	85.13	390	56	1	3	390	56672	56283	2e-121	439	1	S
NorthernBobwhite_SimpleDeNovo_contig_25645	gi|358485511|ref|NC_006088.3_GGA1|	89.61	5455	534	8	2	5426	56925	62376	0	7276	2493	M
NorthernBobwhite_SimpleDeNovo_contig_36903	gi|358485511|ref|NC_006088.3_GGA1|	78.26	667	109	5	809	1457	67676	67028	4e-157	560	3	S
NorthernBobwhite_SimpleDeNovo_contig_307273	gi|358485511|ref|NC_006088.3_GGA1|	75.98	508	102	6	5	501	69431	68933	1e-96	358	2	S
NorthernBobwhite_SimpleDeNovo_contig_225840	gi|358485511|ref|NC_006088.3_GGA1|	82.33	928	135	5	2049	2965	70507	69598	0	939	3	S
NorthernBobwhite_SimpleDeNovo_contig_249483	gi|358485511|ref|NC_006088.3_GGA1|	78.16	174	28	3	25	198	72845	72682	1e-30	138	1	S
NorthernBobwhite_SimpleDeNovo_contig_220329	gi|358485511|ref|NC_006088.3_GGA1|	81.12	429	62	7	246	658	72962	73387	3e-107	394	2	S
NorthernBobwhite_SimpleDeNovo_contig_184752	gi|358485511|ref|NC_006088.3_GGA1|	76.94	1132	185	13	36	1119	76069	74966	0	875	2	S
NorthernBobwhite_SimpleDeNovo_contig_315535	gi|358485511|ref|NC_006088.3_GGA1|	76.71	219	46	3	86	299	76135	76353	3e-36	156	195	M
NorthernBobwhite_SimpleDeNovo_contig_184753	gi|358485511|ref|NC_006088.3_GGA1|	80.05	887	139	11	1043	1911	77817	78683	0	787	44	M
NorthernBobwhite_SimpleDeNovo_contig_185717	gi|358485511|ref|NC_006088.3_GGA1|	86.71	173	22	1	767	939	79179	79008	2e-50	205	738	M
NorthernBobwhite_SimpleDeNovo_contig_122101	gi|358485511|ref|NC_006088.3_GGA1|	75.23	1768	277	35	1	1657	80445	82162	0	1202	36	M
NorthernBobwhite_SimpleDeNovo_contig_249031	gi|358485511|ref|NC_006088.3_GGA1|	71.79	468	72	10	1	457	80470	80052	4e-67	259	4	S
NorthernBobwhite_SimpleDeNovo_contig_248979	gi|358485511|ref|NC_006088.3_GGA1|	73.14	700	112	11	1	676	80470	79823	1e-119	434	19	M
NorthernBobwhite_SimpleDeNovo_contig_249032	gi|358485511|ref|NC_006088.3_GGA1|	73.69	498	104	11	3	480	82750	83240	5e-74	282	1	S
NorthernBobwhite_SimpleDeNovo_contig_309724	gi|358485511|ref|NC_006088.3_GGA1|	70	370	83	9	115	462	83227	82864	5e-35	152	1	S
NorthernBobwhite_SimpleDeNovo_contig_99542	gi|358485511|ref|NC_006088.3_GGA1|	79.27	1529	183	25	374	1828	83254	84722	0	1337	1	S
NorthernBobwhite_SimpleDeNovo_contig_199371	gi|358485511|ref|NC_006088.3_GGA1|	67.4	273	78	3	83	349	85903	85636	1e-15	87.8	2	S
NorthernBobwhite_SimpleDeNovo_contig_16158	gi|358485511|ref|NC_006088.3_GGA1|	76.81	1272	190	17	1	1242	86142	84946	0	982	1	S
NorthernBobwhite_SimpleDeNovo_contig_136775	gi|358485511|ref|NC_006088.3_GGA1|	80.26	2021	281	20	1	1939	86347	88331	0	1862	20	S
NorthernBobwhite_SimpleDeNovo_contig_81259	gi|358485511|ref|NC_006088.3_GGA1|	76.95	243	46	3	113	354	94793	94560	1e-43	181	447	M
NorthernBobwhite_SimpleDeNovo_contig_225016	gi|358485511|ref|NC_006088.3_GGA1|	81.58	467	80	4	225	689	95539	95077	3e-122	443	1	S
NorthernBobwhite_SimpleDeNovo_contig_252694	gi|358485511|ref|NC_006088.3_GGA1|	72.61	752	139	9	1	692	96032	96776	7e-124	448	1	S
NorthernBobwhite_SimpleDeNovo_contig_303963	gi|358485511|ref|NC_006088.3_GGA1|	83.52	273	38	2	1	267	96940	97211	6e-76	288	1	S
NorthernBobwhite_SimpleDeNovo_contig_180597	gi|358485511|ref|NC_006088.3_GGA1|	78.29	760	137	10	443	1176	98241	97484	2e-171	607	3	S
NorthernBobwhite_SimpleDeNovo_contig_149311	gi|358485511|ref|NC_006088.3_GGA1|	75.74	1381	256	22	2288	3602	100634	99267	0	953	4	S
NorthernBobwhite_SimpleDeNovo_contig_220652	gi|358485511|ref|NC_006088.3_GGA1|	81.17	685	85	7	3	677	105247	104597	0	663	1	S
NorthernBobwhite_SimpleDeNovo_contig_241416	gi|358485511|ref|NC_006088.3_GGA1|	78.72	376	44	9	21	362	106128	106501	2e-82	309	1	S
NorthernBobwhite_SimpleDeNovo_contig_134935	gi|358485511|ref|NC_006088.3_GGA1|	90.16	122	9	1	49	167	106519	106640	2e-38	165	2967	M
NorthernBobwhite_SimpleDeNovo_contig_97781	gi|358485511|ref|NC_006088.3_GGA1|	72.84	891	138	21	275	1073	107550	106672	9e-144	515	1	S
NorthernBobwhite_SimpleDeNovo_contig_144901	gi|358485511|ref|NC_006088.3_GGA1|	73.92	487	67	11	165	607	110574	111044	1e-82	311	1	S
NorthernBobwhite_SimpleDeNovo_contig_97780	gi|358485511|ref|NC_006088.3_GGA1|	78.27	2734	346	47	404	3047	110719	108144	0	2264	2	S
NorthernBobwhite_SimpleDeNovo_contig_184558	gi|358485511|ref|NC_006088.3_GGA1|	87.88	33	4	0	1259	1291	110962	110930	0.22	42.8	17	M
NorthernBobwhite_SimpleDeNovo_contig_52685	gi|358485511|ref|NC_006088.3_GGA1|	73.41	361	71	7	3	353	111406	111061	1e-52	210	1	S
NorthernBobwhite_SimpleDeNovo_contig_87691	gi|358485511|ref|NC_006088.3_GGA1|	80.36	280	45	5	1	273	111692	111968	6e-63	244	1	S
NorthernBobwhite_SimpleDeNovo_contig_235145	gi|358485511|ref|NC_006088.3_GGA1|	81.19	319	54	2	1	313	111902	111584	3e-80	302	1	S
NorthernBobwhite_SimpleDeNovo_contig_96837	gi|358485511|ref|NC_006088.3_GGA1|	80.67	238	45	1	154	391	112804	112568	3e-55	219	1	S
NorthernBobwhite_SimpleDeNovo_contig_4853	gi|358485511|ref|NC_006088.3_GGA1|	73.97	991	178	17	405	1373	112815	111883	4e-175	619	3	S
NorthernBobwhite_SimpleDeNovo_contig_3005	gi|358485511|ref|NC_006088.3_GGA1|	74.68	616	123	10	1499	2107	113081	113670	2e-106	392	3	M
NorthernBobwhite_SimpleDeNovo_contig_2321	gi|358485511|ref|NC_006088.3_GGA1|	74.02	612	131	12	259	862	113211	113802	2e-96	358	1	S
NorthernBobwhite_SimpleDeNovo_contig_324062	gi|358485511|ref|NC_006088.3_GGA1|	73.29	146	25	4	57	188	113284	113429	2e-13	82.4	1	S
NorthernBobwhite_SimpleDeNovo_contig_57369	gi|358485511|ref|NC_006088.3_GGA1|	85.47	1383	156	9	232	1581	115393	116763	0	1588	1	S
NorthernBobwhite_SimpleDeNovo_contig_151859	gi|358485511|ref|NC_006088.3_GGA1|	87.83	378	42	1	1	374	117189	116812	9e-132	473	1	S
NorthernBobwhite_SimpleDeNovo_contig_115097	gi|358485511|ref|NC_006088.3_GGA1|	81.85	1592	208	19	4	1577	118963	117435	0	1555	1	S
NorthernBobwhite_SimpleDeNovo_contig_119608	gi|358485511|ref|NC_006088.3_GGA1|	73.49	166	32	1	1	154	122910	123075	3e-21	107	1	S
NorthernBobwhite_SimpleDeNovo_contig_26739	gi|358485511|ref|NC_006088.3_GGA1|	77.89	805	126	5	3	769	122932	122142	0	673	2	S
NorthernBobwhite_SimpleDeNovo_contig_79067	gi|358485511|ref|NC_006088.3_GGA1|	80.59	237	38	2	234	468	123140	122910	4e-55	219	1	S
NorthernBobwhite_SimpleDeNovo_contig_44770	gi|358485511|ref|NC_006088.3_GGA1|	81.37	424	64	3	2	418	125072	125487	7e-112	408	69	M
NorthernBobwhite_SimpleDeNovo_contig_273978	gi|358485511|ref|NC_006088.3_GGA1|	79.53	298	45	3	2	284	125175	125471	1e-68	264	5	S
NorthernBobwhite_SimpleDeNovo_contig_193766	gi|358485511|ref|NC_006088.3_GGA1|	79.8	297	45	6	2	294	125188	125473	5e-65	251	68	M
NorthernBobwhite_SimpleDeNovo_contig_188518	gi|358485511|ref|NC_006088.3_GGA1|	69.93	143	34	4	146	280	125664	125523	6e-06	55.4	483	M
NorthernBobwhite_SimpleDeNovo_contig_188519	gi|358485511|ref|NC_006088.3_GGA1|	79.21	529	89	11	242	766	127670	128181	2e-117	428	2	S
NorthernBobwhite_SimpleDeNovo_contig_200530	gi|358485511|ref|NC_006088.3_GGA1|	77.29	938	124	17	6	895	129949	129053	0	735	1	S
NorthernBobwhite_SimpleDeNovo_contig_139105	gi|358485511|ref|NC_006088.3_GGA1|	77.13	258	38	3	231	487	132098	132335	2e-50	205	3	S
NorthernBobwhite_SimpleDeNovo_contig_139104	gi|358485511|ref|NC_006088.3_GGA1|	87.11	287	28	3	578	855	133406	133120	4e-93	347	1	S
NorthernBobwhite_SimpleDeNovo_contig_87081	gi|358485511|ref|NC_006088.3_GGA1|	69.48	521	91	19	108	612	134577	135045	5e-49	199	1	S
NorthernBobwhite_SimpleDeNovo_contig_130369	gi|358485511|ref|NC_006088.3_GGA1|	69.88	986	181	26	323	1222	136532	135577	4e-117	426	1	S
NorthernBobwhite_SimpleDeNovo_contig_144783	gi|358485511|ref|NC_006088.3_GGA1|	70.62	177	40	7	143	308	137028	137203	1e-08	64.4	26	M
NorthernBobwhite_SimpleDeNovo_contig_135804	gi|358485511|ref|NC_006088.3_GGA1|	73.26	374	65	7	7	370	137356	137008	7e-57	224	1	S
NorthernBobwhite_SimpleDeNovo_contig_36715	gi|358485511|ref|NC_006088.3_GGA1|	76.01	3193	413	54	1551	4481	140448	137347	0	2379	3	S
NorthernBobwhite_SimpleDeNovo_contig_256211	gi|358485511|ref|NC_006088.3_GGA1|	83.1	846	111	6	1	831	142408	143236	0	883	2	S
NorthernBobwhite_SimpleDeNovo_contig_187609	gi|358485511|ref|NC_006088.3_GGA1|	79.16	1118	150	11	8	1072	144027	145114	0	991	1	S
NorthernBobwhite_SimpleDeNovo_contig_229054	gi|358485511|ref|NC_006088.3_GGA1|	80.41	929	117	7	778	1654	146811	147726	0	883	818	M
NorthernBobwhite_SimpleDeNovo_contig_13093	gi|358485511|ref|NC_006088.3_GGA1|	81.72	815	122	5	3	796	148529	149337	0	800	1	S
NorthernBobwhite_SimpleDeNovo_contig_267445	gi|358485511|ref|NC_006088.3_GGA1|	77.78	63	11	1	122	184	149519	149578	0.0003	50	4	M
NorthernBobwhite_SimpleDeNovo_contig_338054	gi|358485511|ref|NC_006088.3_GGA1|	81.65	109	20	0	293	401	149574	149466	2e-21	107	7	S
NorthernBobwhite_SimpleDeNovo_contig_352474	gi|358485511|ref|NC_006088.3_GGA1|	77.59	116	26	0	301	416	149581	149466	3e-17	93.3	6	S
NorthernBobwhite_SimpleDeNovo_contig_223596	gi|358485511|ref|NC_006088.3_GGA1|	81.38	1740	228	19	143	1835	150827	152517	0	1678	1	S
NorthernBobwhite_SimpleDeNovo_contig_79882	gi|358485511|ref|NC_006088.3_GGA1|	85.31	1266	152	12	10	1244	156654	155392	0	1422	4	S
NorthernBobwhite_SimpleDeNovo_contig_50704	gi|358485511|ref|NC_006088.3_GGA1|	68.13	568	78	11	11	529	156964	157477	8e-65	251	2	S
NorthernBobwhite_SimpleDeNovo_contig_187371	gi|358485511|ref|NC_006088.3_GGA1|	75.07	690	95	19	1	645	157905	158562	1e-125	453	1	S
NorthernBobwhite_SimpleDeNovo_contig_248630	gi|358485511|ref|NC_006088.3_GGA1|	93.33	30	2	0	1825	1854	158706	158677	0.034	46.4	6	M
NorthernBobwhite_SimpleDeNovo_contig_130287	gi|358485511|ref|NC_006088.3_GGA1|	85.86	403	49	2	628	1022	159770	160172	1e-129	468	2	S
NorthernBobwhite_SimpleDeNovo_contig_210717	gi|358485511|ref|NC_006088.3_GGA1|	89.04	73	8	0	429	501	162204	162132	5e-18	96.9	3	M
NorthernBobwhite_SimpleDeNovo_contig_127823	gi|358485511|ref|NC_006088.3_GGA1|	84.06	458	58	2	2	456	163535	163090	2e-140	502	1	S
NorthernBobwhite_SimpleDeNovo_contig_283414	gi|358485511|ref|NC_006088.3_GGA1|	72.29	83	20	1	499	581	163600	163679	0.033	44.6	97	M
NorthernBobwhite_SimpleDeNovo_contig_146805	gi|358485511|ref|NC_006088.3_GGA1|	85.31	456	40	6	437	876	164572	164128	6e-145	518	397	M
NorthernBobwhite_SimpleDeNovo_contig_113986	gi|358485511|ref|NC_006088.3_GGA1|	85.76	1461	180	5	3085	4529	169648	171096	0	1700	5	S
NorthernBobwhite_SimpleDeNovo_contig_167324	gi|358485511|ref|NC_006088.3_GGA1|	81.39	2885	357	36	2	2785	171776	174581	0	2782	55	M
NorthernBobwhite_SimpleDeNovo_contig_48613	gi|358485511|ref|NC_006088.3_GGA1|	83.72	2384	303	22	5003	7343	180168	177827	0	2527	7	S
NorthernBobwhite_SimpleDeNovo_contig_11186	gi|358485511|ref|NC_006088.3_GGA1|	92.68	41	3	0	6327	6367	180239	180199	6e-06	60.8	536	M
NorthernBobwhite_SimpleDeNovo_contig_243090	gi|358485511|ref|NC_006088.3_GGA1|	80.39	51	9	1	69	118	183667	183617	0.012	44.6	12	M
NorthernBobwhite_SimpleDeNovo_contig_129776	gi|358485511|ref|NC_006088.3_GGA1|	79.9	204	41	0	49	252	186010	186213	4e-44	183	4	M
NorthernBobwhite_SimpleDeNovo_contig_27489	gi|358485511|ref|NC_006088.3_GGA1|	85.16	1314	159	12	66	1368	189730	188442	0	1469	4	S
NorthernBobwhite_SimpleDeNovo_contig_116155	gi|358485511|ref|NC_006088.3_GGA1|	80.39	1336	179	18	584	1861	192667	191357	0	1222	2	S
NorthernBobwhite_SimpleDeNovo_contig_222543	gi|358485511|ref|NC_006088.3_GGA1|	86.27	743	89	2	1	730	194291	193549	0	883	1	S
NorthernBobwhite_SimpleDeNovo_contig_72231	gi|358485511|ref|NC_006088.3_GGA1|	82.92	5136	639	51	1	4960	194419	199492	0	5294	2	S
NorthernBobwhite_SimpleDeNovo_contig_107451	gi|358485511|ref|NC_006088.3_GGA1|	85.84	113	15	1	624	736	201635	201746	9e-28	129	1	S
NorthernBobwhite_SimpleDeNovo_contig_189086	gi|358485511|ref|NC_006088.3_GGA1|	79.82	342	63	3	1130	1467	202147	201808	2e-78	298	1	S
NorthernBobwhite_SimpleDeNovo_contig_19590	gi|358485511|ref|NC_006088.3_GGA1|	79.1	1139	151	12	1655	2752	205316	204224	0	1005	381	M
NorthernBobwhite_SimpleDeNovo_contig_131355	gi|358485511|ref|NC_006088.3_GGA1|	77.65	4502	718	53	1138	5492	214146	209786	0	3604	4	S
NorthernBobwhite_SimpleDeNovo_contig_117690	gi|358485511|ref|NC_006088.3_GGA1|	82.58	2566	312	32	2423	4879	217968	220507	0	2590	3	S
NorthernBobwhite_SimpleDeNovo_contig_324490	gi|358485511|ref|NC_006088.3_GGA1|	79.95	374	65	6	9	381	221882	222246	4e-85	318	1	S
NorthernBobwhite_SimpleDeNovo_contig_101056	gi|358485511|ref|NC_006088.3_GGA1|	81.13	1436	199	18	1194	2573	225900	224481	0	1352	5	S
NorthernBobwhite_SimpleDeNovo_contig_191655	gi|358485511|ref|NC_006088.3_GGA1|	82.27	908	143	3	99	1006	227966	227077	0	915	1	S
NorthernBobwhite_SimpleDeNovo_contig_264803	gi|358485511|ref|NC_006088.3_GGA1|	79.28	304	49	3	107	399	228321	228021	1e-68	264	1	S
NorthernBobwhite_SimpleDeNovo_contig_4218	gi|358485511|ref|NC_006088.3_GGA1|	86.36	990	115	10	1648	2634	231067	232039	0	1150	2	S
NorthernBobwhite_SimpleDeNovo_contig_199400	gi|358485511|ref|NC_006088.3_GGA1|	81.87	386	57	4	586	958	232943	233328	2e-101	374	2	S
NorthernBobwhite_SimpleDeNovo_contig_114051	gi|358485511|ref|NC_006088.3_GGA1|	82.04	735	95	8	6	715	234070	233348	0	728	1	S
NorthernBobwhite_SimpleDeNovo_contig_187236	gi|358485511|ref|NC_006088.3_GGA1|	78.33	300	63	2	1	299	234129	234427	7e-62	241	1	S
NorthernBobwhite_SimpleDeNovo_contig_49657	gi|358485511|ref|NC_006088.3_GGA1|	83.94	797	108	6	414	1205	235129	235910	0	852	2	S
NorthernBobwhite_SimpleDeNovo_contig_335599	gi|358485511|ref|NC_006088.3_GGA1|	82.08	173	31	0	13	185	236231	236403	3e-41	172	2	S
NorthernBobwhite_SimpleDeNovo_contig_29872	gi|358485511|ref|NC_006088.3_GGA1|	79.57	3334	472	46	1	3241	236430	239647	0	2924	1	S
NorthernBobwhite_SimpleDeNovo_contig_228207	gi|358485511|ref|NC_006088.3_GGA1|	83.57	1522	208	17	2	1506	242416	240920	0	1579	1	S
NorthernBobwhite_SimpleDeNovo_contig_173817	gi|358485511|ref|NC_006088.3_GGA1|	79.28	1453	202	24	1	1403	244027	242624	0	1245	1	S
NorthernBobwhite_SimpleDeNovo_contig_132185	gi|358485511|ref|NC_006088.3_GGA1|	75.4	1569	270	25	86	1559	245908	244361	0	1081	1	S
NorthernBobwhite_SimpleDeNovo_contig_272081	gi|358485511|ref|NC_006088.3_GGA1|	87.5	336	40	1	1	336	247541	247874	6e-114	414	1	S
NorthernBobwhite_SimpleDeNovo_contig_4415	gi|358485511|ref|NC_006088.3_GGA1|	82.89	976	119	14	403	1336	248172	249141	0	987	3	S
NorthernBobwhite_SimpleDeNovo_contig_179906	gi|358485511|ref|NC_006088.3_GGA1|	80.51	1678	205	11	562	2209	253056	251471	0	1613	2	S
NorthernBobwhite_SimpleDeNovo_contig_237211	gi|358485511|ref|NC_006088.3_GGA1|	83.84	198	19	2	3	199	254463	254278	3e-54	215	1	S
NorthernBobwhite_SimpleDeNovo_contig_302034	gi|358485511|ref|NC_006088.3_GGA1|	83.49	327	43	2	1	317	254792	254467	7e-94	347	1	S
NorthernBobwhite_SimpleDeNovo_contig_264612	gi|358485511|ref|NC_006088.3_GGA1|	77.08	96	18	1	1	92	256009	256104	3e-11	73.4	1	S
NorthernBobwhite_SimpleDeNovo_contig_28583	gi|358485511|ref|NC_006088.3_GGA1|	73.49	298	55	7	1	279	256009	256301	6e-41	172	1	S
NorthernBobwhite_SimpleDeNovo_contig_210962	gi|358485511|ref|NC_006088.3_GGA1|	72.24	915	109	13	1	809	256034	255159	6e-163	578	1	S
NorthernBobwhite_SimpleDeNovo_contig_28582	gi|358485511|ref|NC_006088.3_GGA1|	76.51	843	130	10	649	1430	257136	256301	0	645	2	S
NorthernBobwhite_SimpleDeNovo_contig_178380	gi|358485511|ref|NC_006088.3_GGA1|	84.57	1102	149	6	32	1130	257743	258826	0	1213	1	S
NorthernBobwhite_SimpleDeNovo_contig_74222	gi|358485511|ref|NC_006088.3_GGA1|	74.97	2333	289	36	4594	6829	262796	264930	0	1678	8	S
NorthernBobwhite_SimpleDeNovo_contig_94904	gi|358485511|ref|NC_006088.3_GGA1|	77.77	1399	214	34	11	1330	269805	268425	0	1056	8	M
NorthernBobwhite_SimpleDeNovo_contig_259463	gi|358485511|ref|NC_006088.3_GGA1|	74.68	703	86	19	324	1000	271726	271090	5e-128	462	2	S
NorthernBobwhite_SimpleDeNovo_contig_169273	gi|358485511|ref|NC_006088.3_GGA1|	82.1	1000	165	7	1	988	272613	273610	0	978	1	S
NorthernBobwhite_SimpleDeNovo_contig_129519	gi|358485511|ref|NC_006088.3_GGA1|	73.96	1079	178	20	1	1012	273635	274677	0	682	1	S
NorthernBobwhite_SimpleDeNovo_contig_106331	gi|358485511|ref|NC_006088.3_GGA1|	82.74	1188	162	11	48	1195	277146	275962	0	1207	1	S
NorthernBobwhite_SimpleDeNovo_contig_106330	gi|358485511|ref|NC_006088.3_GGA1|	75.1	1458	236	22	530	1925	278294	279686	0	1009	2	S
NorthernBobwhite_SimpleDeNovo_contig_277817	gi|358485511|ref|NC_006088.3_GGA1|	89.67	600	56	5	451	1046	279940	280537	0	785	1	S
NorthernBobwhite_SimpleDeNovo_contig_263124	gi|358485511|ref|NC_006088.3_GGA1|	83.54	1057	150	7	8	1052	280819	281863	0	1112	1	S
NorthernBobwhite_SimpleDeNovo_contig_171986	gi|358485511|ref|NC_006088.3_GGA1|	81.78	1158	163	16	14	1151	283076	281947	0	1108	1	S
NorthernBobwhite_SimpleDeNovo_contig_179238	gi|358485511|ref|NC_006088.3_GGA1|	81.67	180	29	1	268	447	283088	283263	6e-42	176	18	S
NorthernBobwhite_SimpleDeNovo_contig_206741	gi|358485511|ref|NC_006088.3_GGA1|	81.87	182	27	1	285	466	283088	283263	1e-43	181	17	S
NorthernBobwhite_SimpleDeNovo_contig_206742	gi|358485511|ref|NC_006088.3_GGA1|	88.16	304	33	2	1	301	283537	283234	1e-103	379	1	S
NorthernBobwhite_SimpleDeNovo_contig_131731	gi|358485511|ref|NC_006088.3_GGA1|	76.23	551	74	10	1	541	283649	284152	2e-112	410	3	M
NorthernBobwhite_SimpleDeNovo_contig_211209	gi|358485511|ref|NC_006088.3_GGA1|	81.14	859	115	17	383	1206	284155	285001	0	785	1	S
NorthernBobwhite_SimpleDeNovo_contig_21831	gi|358485511|ref|NC_006088.3_GGA1|	79.18	269	44	5	1	266	285155	285414	8e-56	221	1	S
NorthernBobwhite_SimpleDeNovo_contig_344910	gi|358485511|ref|NC_006088.3_GGA1|	80.62	227	34	4	75	300	285414	285197	2e-50	203	973	M
NorthernBobwhite_SimpleDeNovo_contig_72063	gi|358485511|ref|NC_006088.3_GGA1|	76.54	503	77	9	13	501	286523	286048	3e-101	372	1	S
NorthernBobwhite_SimpleDeNovo_contig_30452	gi|358485511|ref|NC_006088.3_GGA1|	77.93	4092	570	56	27	3951	286535	290460	0	3357	4	S
NorthernBobwhite_SimpleDeNovo_contig_361087	gi|358485511|ref|NC_006088.3_GGA1|	85	40	5	1	112	150	290111	290150	0.045	42.8	43	M
NorthernBobwhite_SimpleDeNovo_contig_258214	gi|358485511|ref|NC_006088.3_GGA1|	71.04	221	56	8	1	214	290669	290450	1e-13	82.4	2	S
NorthernBobwhite_SimpleDeNovo_contig_258213	gi|358485511|ref|NC_006088.3_GGA1|	69.44	144	41	3	10	150	290669	290526	0.0002	51.8	22	M
NorthernBobwhite_SimpleDeNovo_contig_62393	gi|358485511|ref|NC_006088.3_GGA1|	76.5	715	98	12	891	1554	293118	293813	1e-151	542	2	S
NorthernBobwhite_SimpleDeNovo_contig_176272	gi|358485511|ref|NC_006088.3_GGA1|	84.99	706	82	3	1082	1764	296569	295865	0	803	226	M
NorthernBobwhite_SimpleDeNovo_contig_197512	gi|358485511|ref|NC_006088.3_GGA1|	81.68	262	41	2	57	311	298255	298516	2e-65	253	1	S
NorthernBobwhite_SimpleDeNovo_contig_65640	gi|358485511|ref|NC_006088.3_GGA1|	81.1	2069	218	28	2843	4797	301060	299051	0	1999	476	M
NorthernBobwhite_SimpleDeNovo_contig_305051	gi|358485511|ref|NC_006088.3_GGA1|	77.36	296	59	1	81	368	306511	306806	4e-60	235	5	M
NorthernBobwhite_SimpleDeNovo_contig_199397	gi|358485511|ref|NC_006088.3_GGA1|	76.27	1319	205	26	835	2084	306550	305271	0	948	2	S
NorthernBobwhite_SimpleDeNovo_contig_308952	gi|358485511|ref|NC_006088.3_GGA1|	78.21	280	57	4	26	304	306643	306919	3e-54	215	1	S
NorthernBobwhite_SimpleDeNovo_contig_183752	gi|358485511|ref|NC_006088.3_GGA1|	82.93	205	33	1	5	209	306901	306699	2e-52	210	1	S
NorthernBobwhite_SimpleDeNovo_contig_22232	gi|358485511|ref|NC_006088.3_GGA1|	80.96	898	104	15	1039	1893	308606	307733	0	841	3	S
NorthernBobwhite_SimpleDeNovo_contig_22233	gi|358485511|ref|NC_006088.3_GGA1|	77.5	2116	301	35	17	2042	310211	312241	0	1671	1	S
NorthernBobwhite_SimpleDeNovo_contig_11468	gi|358485511|ref|NC_006088.3_GGA1|	76.68	2376	353	35	5853	8050	320195	322547	0	1811	10	M
NorthernBobwhite_SimpleDeNovo_contig_79749	gi|358485511|ref|NC_006088.3_GGA1|	78.13	1271	176	25	100	1303	322871	324106	0	1018	1	S
NorthernBobwhite_SimpleDeNovo_contig_51330	gi|358485511|ref|NC_006088.3_GGA1|	81.74	1205	168	12	1	1186	324216	325387	0	1175	1	S
NorthernBobwhite_SimpleDeNovo_contig_204696	gi|358485511|ref|NC_006088.3_GGA1|	77.68	1129	151	16	554	1590	326179	327298	0	919	2	S
NorthernBobwhite_SimpleDeNovo_contig_123068	gi|358485511|ref|NC_006088.3_GGA1|	74.37	593	105	12	52	608	327952	327371	5e-101	372	1	S
NorthernBobwhite_SimpleDeNovo_contig_328165	gi|358485511|ref|NC_006088.3_GGA1|	74.27	171	32	5	127	295	328241	328081	6e-19	98.7	1	S
NorthernBobwhite_SimpleDeNovo_contig_258366	gi|358485511|ref|NC_006088.3_GGA1|	73.13	402	58	14	115	483	328849	328465	1e-55	221	2	S
NorthernBobwhite_SimpleDeNovo_contig_148526	gi|358485511|ref|NC_006088.3_GGA1|	72.69	1091	170	16	95	1111	330184	329148	0	668	1	S
NorthernBobwhite_SimpleDeNovo_contig_148527	gi|358485511|ref|NC_006088.3_GGA1|	74.62	1119	188	24	11	1037	330395	331509	0	717	1	S
NorthernBobwhite_SimpleDeNovo_contig_9668	gi|358485511|ref|NC_006088.3_GGA1|	68.65	1359	239	30	1	1179	333082	331731	3e-158	563	1	S
NorthernBobwhite_SimpleDeNovo_contig_191548	gi|358485511|ref|NC_006088.3_GGA1|	84.29	401	46	3	1	400	333681	333297	7e-122	441	1	S
NorthernBobwhite_SimpleDeNovo_contig_9669	gi|358485511|ref|NC_006088.3_GGA1|	84.56	667	71	11	8	646	333833	334495	0	719	2	S
NorthernBobwhite_SimpleDeNovo_contig_371276	gi|358485511|ref|NC_006088.3_GGA1|	88.89	36	3	1	672	706	339352	339317	0.027	44.6	67	M
NorthernBobwhite_SimpleDeNovo_contig_172881	gi|358485511|ref|NC_006088.3_GGA1|	72.94	1445	255	34	629	1982	340133	338734	0	812	4	S
NorthernBobwhite_SimpleDeNovo_contig_34223	gi|358485511|ref|NC_006088.3_GGA1|	83.5	600	97	1	1	600	342568	341971	3e-179	634	16	M
NorthernBobwhite_SimpleDeNovo_contig_162246	gi|358485511|ref|NC_006088.3_GGA1|	73.7	1403	268	21	3071	4391	344217	342834	0	863	4	S
NorthernBobwhite_SimpleDeNovo_contig_111505	gi|358485511|ref|NC_006088.3_GGA1|	80.13	312	50	3	2	305	349340	349647	8e-74	280	1	S
NorthernBobwhite_SimpleDeNovo_contig_205792	gi|358485511|ref|NC_006088.3_GGA1|	78.2	344	52	5	522	859	350783	351109	3e-73	280	1	S
NorthernBobwhite_SimpleDeNovo_contig_189452	gi|358485511|ref|NC_006088.3_GGA1|	79.41	136	16	3	19	152	351667	351792	2e-24	116	1	S
NorthernBobwhite_SimpleDeNovo_contig_182650	gi|358485511|ref|NC_006088.3_GGA1|	80.88	136	14	3	19	152	351667	351792	4e-27	125	1	S
NorthernBobwhite_SimpleDeNovo_contig_182649	gi|358485511|ref|NC_006088.3_GGA1|	75.2	1379	235	22	1	1299	354142	352791	0	942	1	S
NorthernBobwhite_SimpleDeNovo_contig_218231	gi|358485511|ref|NC_006088.3_GGA1|	75.91	303	57	7	3	297	354626	354920	7e-50	201	1	S
NorthernBobwhite_SimpleDeNovo_contig_97013	gi|358485511|ref|NC_006088.3_GGA1|	74.95	515	94	7	1	487	357498	356991	1e-93	347	1	S
NorthernBobwhite_SimpleDeNovo_contig_113593	gi|358485511|ref|NC_006088.3_GGA1|	77.15	871	141	19	1615	2438	358458	357599	0	641	3	S
NorthernBobwhite_SimpleDeNovo_contig_177316	gi|358485511|ref|NC_006088.3_GGA1|	70.37	405	73	9	718	1103	359571	359947	1e-46	192	1565	M
NorthernBobwhite_SimpleDeNovo_contig_273977	gi|358485511|ref|NC_006088.3_GGA1|	85.82	134	18	1	420	552	359806	359939	6e-35	152	1660	M
NorthernBobwhite_SimpleDeNovo_contig_366940	gi|358485511|ref|NC_006088.3_GGA1|	70.35	199	29	6	71	266	360667	360838	3e-17	93.3	2	S
NorthernBobwhite_SimpleDeNovo_contig_335235	gi|358485511|ref|NC_006088.3_GGA1|	92.25	284	20	1	123	404	361545	361828	1e-112	410	1	S
NorthernBobwhite_SimpleDeNovo_contig_247782	gi|358485511|ref|NC_006088.3_GGA1|	72.55	153	25	8	52	204	362518	362653	4e-09	66.2	11	M
NorthernBobwhite_SimpleDeNovo_contig_153057	gi|358485511|ref|NC_006088.3_GGA1|	68.28	372	72	7	5	345	364957	365313	1e-33	149	1	S
NorthernBobwhite_SimpleDeNovo_contig_107348	gi|358485511|ref|NC_006088.3_GGA1|	74.05	289	51	9	374	640	366508	366794	1e-38	165	957	M
NorthernBobwhite_SimpleDeNovo_contig_160649	gi|358485511|ref|NC_006088.3_GGA1|	70	720	133	24	204	847	367475	366763	1e-76	291	1	S
NorthernBobwhite_SimpleDeNovo_contig_56355	gi|358485511|ref|NC_006088.3_GGA1|	77.94	417	79	6	16	421	368881	369295	2e-85	322	1	S
NorthernBobwhite_SimpleDeNovo_contig_69429	gi|358485511|ref|NC_006088.3_GGA1|	73.99	469	76	14	613	1058	371039	370594	1e-71	275	1	S
NorthernBobwhite_SimpleDeNovo_contig_262264	gi|358485511|ref|NC_006088.3_GGA1|	80.04	486	88	6	574	1051	372554	372070	1e-115	421	410	M
NorthernBobwhite_SimpleDeNovo_contig_208235	gi|358485511|ref|NC_006088.3_GGA1|	68.36	354	71	13	523	853	374173	373838	8e-23	113	5	S
NorthernBobwhite_SimpleDeNovo_contig_75214	gi|358485511|ref|NC_006088.3_GGA1|	72.8	669	143	14	7	643	375272	375933	9e-97	358	18	S
NorthernBobwhite_SimpleDeNovo_contig_230667	gi|358485511|ref|NC_006088.3_GGA1|	69.02	1036	185	32	2	921	376965	377980	4e-109	399	1	S
NorthernBobwhite_SimpleDeNovo_contig_52458	gi|358485511|ref|NC_006088.3_GGA1|	80.04	486	58	7	969	1443	379572	380029	6e-122	443	5	M
NorthernBobwhite_SimpleDeNovo_contig_297092	gi|358485511|ref|NC_006088.3_GGA1|	79.34	242	40	3	1086	1322	383385	383149	7e-51	206	1	S
NorthernBobwhite_SimpleDeNovo_contig_103451	gi|358485511|ref|NC_006088.3_GGA1|	70.18	882	182	19	1	803	386350	385471	5e-107	392	2	M
NorthernBobwhite_SimpleDeNovo_contig_6226	gi|358485511|ref|NC_006088.3_GGA1|	66.12	850	169	29	1	761	386602	387421	1e-52	212	1	S
NorthernBobwhite_SimpleDeNovo_contig_356046	gi|358485511|ref|NC_006088.3_GGA1|	84.92	325	38	7	240	558	387544	387863	2e-92	343	1	S
NorthernBobwhite_SimpleDeNovo_contig_261657	gi|358485511|ref|NC_006088.3_GGA1|	82.22	45	8	0	392	436	409130	409174	0.005	46.4	23	M
NorthernBobwhite_SimpleDeNovo_contig_64892	gi|358485511|ref|NC_006088.3_GGA1|	77.47	324	53	5	6	314	409314	408996	4e-65	251	36	M
NorthernBobwhite_SimpleDeNovo_contig_292721	gi|358485511|ref|NC_006088.3_GGA1|	74.22	322	55	13	3	305	409325	409013	9e-42	174	180	M
NorthernBobwhite_SimpleDeNovo_contig_298642	gi|358485511|ref|NC_006088.3_GGA1|	93.33	30	2	0	1	30	410712	410741	0.003	46.4	103	M
NorthernBobwhite_SimpleDeNovo_contig_294550	gi|358485511|ref|NC_006088.3_GGA1|	74.45	227	48	3	113	334	411359	411138	2e-32	143	93	M
NorthernBobwhite_SimpleDeNovo_contig_288820	gi|358485511|ref|NC_006088.3_GGA1|	85.21	534	79	0	25	558	420776	421309	9e-172	607	1	S
NorthernBobwhite_SimpleDeNovo_contig_110722	gi|358485511|ref|NC_006088.3_GGA1|	70.54	336	51	8	95	384	425231	425564	2e-39	167	307	M
NorthernBobwhite_SimpleDeNovo_contig_212299	gi|358485511|ref|NC_006088.3_GGA1|	80.61	428	75	2	101	520	426461	426034	3e-108	396	47	M
NorthernBobwhite_SimpleDeNovo_contig_197771	gi|358485511|ref|NC_006088.3_GGA1|	73.71	483	72	11	43	496	426921	427377	5e-79	298	1	S
NorthernBobwhite_SimpleDeNovo_contig_16751	gi|358485511|ref|NC_006088.3_GGA1|	72.58	248	50	6	11	241	428391	428145	4e-28	131	9	M
NorthernBobwhite_SimpleDeNovo_contig_16750	gi|358485511|ref|NC_006088.3_GGA1|	91.85	1509	92	7	2075	3564	431415	432911	0	2163	5	S
NorthernBobwhite_SimpleDeNovo_contig_74352	gi|358485511|ref|NC_006088.3_GGA1|	83.8	1858	165	21	636	2365	436553	438402	0	2022	3	S
NorthernBobwhite_SimpleDeNovo_contig_274829	gi|358485511|ref|NC_006088.3_GGA1|	84.43	488	69	3	24	506	440325	440810	1e-148	531	2	S
NorthernBobwhite_SimpleDeNovo_contig_17839	gi|358485511|ref|NC_006088.3_GGA1|	82.69	2334	281	21	2105	4337	444729	442418	0	2405	4	S
NorthernBobwhite_SimpleDeNovo_contig_307460	gi|358485511|ref|NC_006088.3_GGA1|	85.16	748	67	10	1	726	446961	447686	0	843	1	S
NorthernBobwhite_SimpleDeNovo_contig_164658	gi|358485511|ref|NC_006088.3_GGA1|	80.02	1131	141	15	5	1056	449523	448399	0	1031	1	S
NorthernBobwhite_SimpleDeNovo_contig_164659	gi|358485511|ref|NC_006088.3_GGA1|	79.63	707	98	11	15	692	449532	450221	2e-174	618	305	M
NorthernBobwhite_SimpleDeNovo_contig_189526	gi|358485511|ref|NC_006088.3_GGA1|	76.25	160	26	4	372	525	453400	453247	2e-22	111	1	S
NorthernBobwhite_SimpleDeNovo_contig_60539	gi|358485511|ref|NC_006088.3_GGA1|	73.2	403	82	11	1030	1420	455890	455502	6e-53	214	2	S
NorthernBobwhite_SimpleDeNovo_contig_192800	gi|358485511|ref|NC_006088.3_GGA1|	77.53	178	28	5	8	181	462471	462302	8e-28	129	1	S
NorthernBobwhite_SimpleDeNovo_contig_140275	gi|358485511|ref|NC_006088.3_GGA1|	77.98	913	132	19	335	1228	468084	468946	0	717	1	S
NorthernBobwhite_SimpleDeNovo_contig_139402	gi|358485511|ref|NC_006088.3_GGA1|	85.23	149	18	4	75	221	468970	469116	3e-36	156	3	S
NorthernBobwhite_SimpleDeNovo_contig_230562	gi|358485511|ref|NC_006088.3_GGA1|	83.33	54	9	0	312	365	470432	470485	4e-06	57.2	461	M
NorthernBobwhite_SimpleDeNovo_contig_8669	gi|358485511|ref|NC_006088.3_GGA1|	77.5	160	36	0	1	160	471840	471999	2e-27	127	43	M
NorthernBobwhite_SimpleDeNovo_contig_279594	gi|358485511|ref|NC_006088.3_GGA1|	76.35	334	65	8	159	481	472112	471782	3e-56	223	5	S
NorthernBobwhite_SimpleDeNovo_contig_21398	gi|358485511|ref|NC_006088.3_GGA1|	70.24	1744	258	42	1843	3392	475864	474188	0	852	9	S
NorthernBobwhite_SimpleDeNovo_contig_93951	gi|358485511|ref|NC_006088.3_GGA1|	76.1	1301	193	22	26	1253	478332	479587	0	951	1	S
NorthernBobwhite_SimpleDeNovo_contig_29683	gi|358485511|ref|NC_006088.3_GGA1|	73.94	894	128	23	658	1463	480534	481410	1e-154	553	3	S
NorthernBobwhite_SimpleDeNovo_contig_222351	gi|358485511|ref|NC_006088.3_GGA1|	73.05	167	22	8	387	530	484347	484513	5e-14	84.2	2	M
NorthernBobwhite_SimpleDeNovo_contig_18950	gi|358485511|ref|NC_006088.3_GGA1|	78.16	1172	160	16	2317	3401	487375	488537	0	975	296	M
NorthernBobwhite_SimpleDeNovo_contig_296022	gi|358485511|ref|NC_006088.3_GGA1|	83.83	402	64	1	1	401	488756	489157	3e-118	428	180	M
NorthernBobwhite_SimpleDeNovo_contig_208680	gi|358485511|ref|NC_006088.3_GGA1|	77.88	330	55	6	2	329	488822	488509	4e-66	255	60	M
NorthernBobwhite_SimpleDeNovo_contig_232468	gi|358485511|ref|NC_006088.3_GGA1|	79.34	334	52	5	257	575	489411	489080	1e-74	284	5	M
NorthernBobwhite_SimpleDeNovo_contig_138136	gi|358485511|ref|NC_006088.3_GGA1|	85.39	746	89	8	1645	2371	490898	490154	0	836	3	S
NorthernBobwhite_SimpleDeNovo_contig_24235	gi|358485511|ref|NC_006088.3_GGA1|	72.97	2264	314	48	1117	3202	499428	497285	0	1377	2640	M
NorthernBobwhite_SimpleDeNovo_contig_301242	gi|358485511|ref|NC_006088.3_GGA1|	79.33	445	70	8	12	449	500830	500401	3e-101	372	1	S
NorthernBobwhite_SimpleDeNovo_contig_313733	gi|358485511|ref|NC_006088.3_GGA1|	80.05	762	102	9	84	800	501011	501767	0	693	1	S
NorthernBobwhite_SimpleDeNovo_contig_46578	gi|358485511|ref|NC_006088.3_GGA1|	93.97	282	17	0	1113	1394	502640	502359	1e-118	432	3	S
NorthernBobwhite_SimpleDeNovo_contig_318577	gi|358485511|ref|NC_006088.3_GGA1|	79	600	79	11	29	599	503718	504299	7e-142	508	864	M
NorthernBobwhite_SimpleDeNovo_contig_46362	gi|358485511|ref|NC_006088.3_GGA1|	73.11	502	62	9	1	431	504389	504888	4e-86	322	1	S
NorthernBobwhite_SimpleDeNovo_contig_214466	gi|358485511|ref|NC_006088.3_GGA1|	78.65	665	78	11	25	626	505018	505681	1e-159	567	1	S
NorthernBobwhite_SimpleDeNovo_contig_184760	gi|358485511|ref|NC_006088.3_GGA1|	84.21	975	105	10	1485	2420	508756	507792	0	1063	3	S
NorthernBobwhite_SimpleDeNovo_contig_231162	gi|358485511|ref|NC_006088.3_GGA1|	82.16	241	34	3	161	395	509983	510220	5e-60	235	1	S
NorthernBobwhite_SimpleDeNovo_contig_97472	gi|358485511|ref|NC_006088.3_GGA1|	82.16	241	34	3	59	293	510220	509983	5e-60	235	1	S
NorthernBobwhite_SimpleDeNovo_contig_10805	gi|358485511|ref|NC_006088.3_GGA1|	82.37	1384	155	20	841	2165	511053	512406	0	1386	9	M
NorthernBobwhite_SimpleDeNovo_contig_253338	gi|358485511|ref|NC_006088.3_GGA1|	81.35	665	85	10	432	1064	519933	520590	2e-178	630	2	S
NorthernBobwhite_SimpleDeNovo_contig_145314	gi|358485511|ref|NC_006088.3_GGA1|	75.66	1709	295	32	120	1776	520502	522141	0	1171	260	M
NorthernBobwhite_SimpleDeNovo_contig_162926	gi|358485511|ref|NC_006088.3_GGA1|	74.55	994	112	21	229	1110	522624	523588	0	684	54	M
NorthernBobwhite_SimpleDeNovo_contig_132985	gi|358485511|ref|NC_006088.3_GGA1|	73.23	523	62	17	154	609	526740	526229	8e-81	306	1	S
NorthernBobwhite_SimpleDeNovo_contig_292548	gi|358485511|ref|NC_006088.3_GGA1|	89.83	295	21	4	3	293	528422	528133	8e-106	387	1	S
NorthernBobwhite_SimpleDeNovo_contig_234871	gi|358485511|ref|NC_006088.3_GGA1|	75.72	346	63	3	12	337	532475	532819	5e-65	251	4	S
NorthernBobwhite_SimpleDeNovo_contig_300223	gi|358485511|ref|NC_006088.3_GGA1|	71.81	376	90	4	3	363	532944	532570	1e-48	197	19	M
NorthernBobwhite_SimpleDeNovo_contig_246051	gi|358485511|ref|NC_006088.3_GGA1|	74.08	490	95	4	29	513	533110	532648	5e-86	322	4	S
NorthernBobwhite_SimpleDeNovo_contig_235199	gi|358485511|ref|NC_006088.3_GGA1|	74.12	85	13	4	6	86	533309	533388	0.11	44.6	30	M
NorthernBobwhite_SimpleDeNovo_contig_254010	gi|358485511|ref|NC_006088.3_GGA1|	85	40	6	0	1705	1744	533344	533383	0.02	46.4	54	M
NorthernBobwhite_SimpleDeNovo_contig_138503	gi|358485511|ref|NC_006088.3_GGA1|	93.33	30	2	0	286	315	533351	533380	0.003	46.4	377	M
NorthernBobwhite_SimpleDeNovo_contig_293528	gi|358485511|ref|NC_006088.3_GGA1|	92.31	39	1	2	952	989	533363	533400	0.005	50	88	M
NorthernBobwhite_SimpleDeNovo_contig_212707	gi|358485511|ref|NC_006088.3_GGA1|	79.17	528	69	13	158	679	533501	533993	4e-120	435	1	S
NorthernBobwhite_SimpleDeNovo_contig_298736	gi|358485511|ref|NC_006088.3_GGA1|	89.97	349	29	3	59	406	536708	536365	5e-129	464	1	S
NorthernBobwhite_SimpleDeNovo_contig_103003	gi|358485511|ref|NC_006088.3_GGA1|	85.9	610	64	6	194	784	536966	537572	0	706	1	S
NorthernBobwhite_SimpleDeNovo_contig_150183	gi|358485511|ref|NC_006088.3_GGA1|	81.94	753	108	11	2	746	539112	539844	0	720	1	S
NorthernBobwhite_SimpleDeNovo_contig_256993	gi|358485511|ref|NC_006088.3_GGA1|	78.36	804	84	14	119	847	539902	540690	0	684	1	S
NorthernBobwhite_SimpleDeNovo_contig_261850	gi|358485511|ref|NC_006088.3_GGA1|	84.93	1699	153	17	8	1629	542445	540773	0	1927	2	S
NorthernBobwhite_SimpleDeNovo_contig_162793	gi|358485511|ref|NC_006088.3_GGA1|	86.13	375	33	6	46	415	542678	543038	3e-119	432	1	S
NorthernBobwhite_SimpleDeNovo_contig_167948	gi|358485511|ref|NC_006088.3_GGA1|	84.31	2709	286	24	100	2756	546833	544212	0	2987	2	S
NorthernBobwhite_SimpleDeNovo_contig_18311	gi|358485511|ref|NC_006088.3_GGA1|	82.38	2264	211	23	708	2800	549459	547213	0	2351	2	S
NorthernBobwhite_SimpleDeNovo_contig_152315	gi|358485511|ref|NC_006088.3_GGA1|	85.75	435	45	3	2	421	550319	550751	5e-142	508	1	S
NorthernBobwhite_SimpleDeNovo_contig_98861	gi|358485511|ref|NC_006088.3_GGA1|	80.1	613	73	11	2	573	551516	550912	6e-155	551	1	S
NorthernBobwhite_SimpleDeNovo_contig_87468	gi|358485511|ref|NC_006088.3_GGA1|	79.4	1801	192	27	31	1681	554408	552637	0	1615	2	S
NorthernBobwhite_SimpleDeNovo_contig_87467	gi|358485511|ref|NC_006088.3_GGA1|	81.64	1400	165	16	1	1336	554635	556006	0	1377	7	M
NorthernBobwhite_SimpleDeNovo_contig_185275	gi|358485511|ref|NC_006088.3_GGA1|	88.67	353	26	5	6	357	556351	556690	1e-123	446	1	S
NorthernBobwhite_SimpleDeNovo_contig_66586	gi|358485511|ref|NC_006088.3_GGA1|	83.82	1347	165	14	664	1991	557814	559126	0	1431	5	M
NorthernBobwhite_SimpleDeNovo_contig_33365	gi|358485511|ref|NC_006088.3_GGA1|	80.28	355	44	3	1	335	562260	561912	8e-90	334	1	S
NorthernBobwhite_SimpleDeNovo_contig_47394	gi|358485511|ref|NC_006088.3_GGA1|	78.19	2421	337	29	940	3242	564768	562421	0	2028	29	M
NorthernBobwhite_SimpleDeNovo_contig_114521	gi|358485511|ref|NC_006088.3_GGA1|	86.3	1124	109	10	498	1592	567525	568632	0	1328	3	S
NorthernBobwhite_SimpleDeNovo_contig_98860	gi|358485511|ref|NC_006088.3_GGA1|	78.98	723	72	19	1	689	569549	570225	4e-171	605	48	M
NorthernBobwhite_SimpleDeNovo_contig_136198	gi|358485511|ref|NC_006088.3_GGA1|	79.29	1304	156	15	7	1200	571927	570628	0	1169	1	S
NorthernBobwhite_SimpleDeNovo_contig_91693	gi|358485511|ref|NC_006088.3_GGA1|	90.91	33	2	1	901	933	573107	573138	0.22	42.8	7	M
NorthernBobwhite_SimpleDeNovo_contig_269264	gi|358485511|ref|NC_006088.3_GGA1|	87.46	558	43	8	170	715	573135	572593	0	679	1	S
NorthernBobwhite_SimpleDeNovo_contig_177197	gi|358485511|ref|NC_006088.3_GGA1|	82.11	408	52	5	273	667	574535	574136	6e-110	403	2	S
NorthernBobwhite_SimpleDeNovo_contig_274350	gi|358485511|ref|NC_006088.3_GGA1|	73.42	395	67	6	4	361	576207	575814	2e-63	246	4	M
NorthernBobwhite_SimpleDeNovo_contig_274351	gi|358485511|ref|NC_006088.3_GGA1|	73.67	395	66	6	4	361	576207	575814	5e-65	251	5	M
NorthernBobwhite_SimpleDeNovo_contig_128744	gi|358485511|ref|NC_006088.3_GGA1|	78.06	2206	302	29	23	2087	577884	575720	0	1829	37	M
NorthernBobwhite_SimpleDeNovo_contig_218552	gi|358485511|ref|NC_006088.3_GGA1|	74.03	593	80	14	1030	1552	578636	578048	6e-103	379	4	S
NorthernBobwhite_SimpleDeNovo_contig_288380	gi|358485511|ref|NC_006088.3_GGA1|	80.37	698	64	7	49	701	581668	582337	0	675	1	S
NorthernBobwhite_SimpleDeNovo_contig_98402	gi|358485511|ref|NC_006088.3_GGA1|	77.6	1107	139	18	1611	2656	585224	584166	0	895	2	S
NorthernBobwhite_SimpleDeNovo_contig_100006	gi|358485511|ref|NC_006088.3_GGA1|	76.4	322	43	9	29	326	586210	586522	2e-57	228	3994	M
NorthernBobwhite_SimpleDeNovo_contig_228941	gi|358485511|ref|NC_006088.3_GGA1|	72.07	179	27	5	47	204	587343	587519	2e-18	96.9	1	S
NorthernBobwhite_SimpleDeNovo_contig_98401	gi|358485511|ref|NC_006088.3_GGA1|	86.87	198	20	4	773	965	588246	588442	2e-57	228	1	S
NorthernBobwhite_SimpleDeNovo_contig_145086	gi|358485511|ref|NC_006088.3_GGA1|	70.46	887	109	25	337	1080	588999	589875	1e-122	444	1	S
NorthernBobwhite_SimpleDeNovo_contig_94463	gi|358485511|ref|NC_006088.3_GGA1|	77.72	1140	139	18	307	1374	591164	590068	0	933	33	M
NorthernBobwhite_SimpleDeNovo_contig_223605	gi|358485511|ref|NC_006088.3_GGA1|	84.62	39	6	0	163	201	597380	597418	0.016	44.6	9	M
NorthernBobwhite_SimpleDeNovo_contig_320702	gi|358485511|ref|NC_006088.3_GGA1|	70.57	1094	184	31	95	1089	597614	596560	5e-141	506	1	S
NorthernBobwhite_SimpleDeNovo_contig_112291	gi|358485511|ref|NC_006088.3_GGA1|	77.03	1032	104	22	210	1118	602772	601751	0	814	1	S
NorthernBobwhite_SimpleDeNovo_contig_34812	gi|358485511|ref|NC_006088.3_GGA1|	76.95	2009	185	35	1	1843	606042	604146	0	1629	3	S
NorthernBobwhite_SimpleDeNovo_contig_240645	gi|358485511|ref|NC_006088.3_GGA1|	77.3	141	19	5	187	320	608628	608762	2e-19	100	1	S
NorthernBobwhite_SimpleDeNovo_contig_331887	gi|358485511|ref|NC_006088.3_GGA1|	90.62	32	2	1	91	122	610157	610127	0.15	41	22	M
NorthernBobwhite_SimpleDeNovo_contig_139776	gi|358485511|ref|NC_006088.3_GGA1|	81.31	781	111	8	32	784	610351	611124	0	746	1	S
NorthernBobwhite_SimpleDeNovo_contig_101556	gi|358485511|ref|NC_006088.3_GGA1|	75.06	2013	249	40	1	1800	616140	614168	0	1415	2	S
NorthernBobwhite_SimpleDeNovo_contig_101847	gi|358485511|ref|NC_006088.3_GGA1|	77.1	1157	126	17	233	1307	616857	617956	0	940	1	S
NorthernBobwhite_SimpleDeNovo_contig_226021	gi|358485511|ref|NC_006088.3_GGA1|	84.54	207	29	2	105	310	618227	618023	2e-56	223	1	S
NorthernBobwhite_SimpleDeNovo_contig_214459	gi|358485511|ref|NC_006088.3_GGA1|	86.77	499	66	0	1	499	618990	618492	1e-170	603	1	S
NorthernBobwhite_SimpleDeNovo_contig_305966	gi|358485511|ref|NC_006088.3_GGA1|	69.02	184	39	7	270	443	619895	620070	2e-07	60.8	6	M
NorthernBobwhite_SimpleDeNovo_contig_263343	gi|358485511|ref|NC_006088.3_GGA1|	72.79	1349	261	28	21	1332	622318	623597	0	747	2	S
NorthernBobwhite_SimpleDeNovo_contig_244745	gi|358485511|ref|NC_006088.3_GGA1|	74.61	453	49	6	5	393	626408	625958	1e-88	331	1	S
NorthernBobwhite_SimpleDeNovo_contig_299223	gi|358485511|ref|NC_006088.3_GGA1|	89.47	323	27	3	1	318	627695	628015	1e-116	423	1	S
NorthernBobwhite_SimpleDeNovo_contig_232823	gi|358485511|ref|NC_006088.3_GGA1|	72.38	315	44	17	1	300	627989	628275	7e-31	138	11	S
NorthernBobwhite_SimpleDeNovo_contig_203937	gi|358485511|ref|NC_006088.3_GGA1|	69.51	223	42	15	77	286	629227	629436	0.0001	51.8	68	M
NorthernBobwhite_SimpleDeNovo_contig_120383	gi|358485511|ref|NC_006088.3_GGA1|	69.61	181	29	12	59	232	629239	629400	0.002	48.2	61	M
NorthernBobwhite_SimpleDeNovo_contig_258950	gi|358485511|ref|NC_006088.3_GGA1|	81.33	466	63	11	1	461	630240	629794	1e-115	421	2	S
NorthernBobwhite_SimpleDeNovo_contig_249749	gi|358485511|ref|NC_006088.3_GGA1|	67.29	376	67	19	122	481	631600	631935	7e-16	89.7	1	S
NorthernBobwhite_SimpleDeNovo_contig_161110	gi|358485511|ref|NC_006088.3_GGA1|	66.17	337	55	20	2	322	631647	631940	3e-06	57.2	11	M
NorthernBobwhite_SimpleDeNovo_contig_270328	gi|358485511|ref|NC_006088.3_GGA1|	69.66	145	35	4	99	236	631742	631600	2e-05	53.6	12	M
NorthernBobwhite_SimpleDeNovo_contig_212126	gi|358485511|ref|NC_006088.3_GGA1|	69.65	425	82	14	3	398	631915	631509	6e-39	165	5	S
NorthernBobwhite_SimpleDeNovo_contig_317441	gi|358485511|ref|NC_006088.3_GGA1|	75.36	414	68	8	1	389	632882	632478	4e-74	282	1	S
NorthernBobwhite_SimpleDeNovo_contig_278542	gi|358485511|ref|NC_006088.3_GGA1|	72.32	383	67	11	22	391	633213	632857	3e-49	199	1	S
NorthernBobwhite_SimpleDeNovo_contig_327824	gi|358485511|ref|NC_006088.3_GGA1|	77.62	478	52	5	1	477	633596	634019	1e-111	407	1	S
NorthernBobwhite_SimpleDeNovo_contig_86009	gi|358485511|ref|NC_006088.3_GGA1|	73.4	2410	309	57	1	2169	636983	634665	0	1499	2	S
NorthernBobwhite_SimpleDeNovo_contig_42368	gi|358485511|ref|NC_006088.3_GGA1|	77.07	894	108	21	160	1012	637393	638230	0	681	1	S
NorthernBobwhite_SimpleDeNovo_contig_338977	gi|358485511|ref|NC_006088.3_GGA1|	90.62	32	3	0	1148	1179	637722	637691	0.068	44.6	15	M
NorthernBobwhite_SimpleDeNovo_contig_100976	gi|358485511|ref|NC_006088.3_GGA1|	78.64	1568	231	30	1	1529	642245	640743	0	1276	3	S
NorthernBobwhite_SimpleDeNovo_contig_42361	gi|358485511|ref|NC_006088.3_GGA1|	84	750	91	10	384	1121	643829	643097	0	792	2	S
NorthernBobwhite_SimpleDeNovo_contig_342198	gi|358485511|ref|NC_006088.3_GGA1|	80.56	324	40	7	1	305	644801	645120	2e-76	289	1	S
NorthernBobwhite_SimpleDeNovo_contig_138140	gi|358485511|ref|NC_006088.3_GGA1|	79.67	1264	186	16	1	1239	645188	646405	0	1113	1	S
NorthernBobwhite_SimpleDeNovo_contig_59111	gi|358485511|ref|NC_006088.3_GGA1|	84.31	1447	206	6	2018	3448	648309	646868	0	1579	4	S
NorthernBobwhite_SimpleDeNovo_contig_59110	gi|358485511|ref|NC_006088.3_GGA1|	71.08	204	27	6	33	207	650732	650932	2e-20	104	1	S
NorthernBobwhite_SimpleDeNovo_contig_352205	gi|358485511|ref|NC_006088.3_GGA1|	86.27	51	5	2	833	882	653483	653532	9e-05	53.6	40	M
NorthernBobwhite_SimpleDeNovo_contig_193670	gi|358485511|ref|NC_006088.3_GGA1|	73.29	1258	192	29	208	1382	653939	652743	0	753	2	S
NorthernBobwhite_SimpleDeNovo_contig_186867	gi|358485511|ref|NC_006088.3_GGA1|	71.21	448	67	14	2	436	654726	655124	4e-55	219	1	S
NorthernBobwhite_SimpleDeNovo_contig_200830	gi|358485511|ref|NC_006088.3_GGA1|	71.64	275	61	14	59	326	654786	655050	2e-18	96.9	6	M
NorthernBobwhite_SimpleDeNovo_contig_335303	gi|358485511|ref|NC_006088.3_GGA1|	73.84	344	73	14	64	400	654786	655119	2e-39	167	10	S
NorthernBobwhite_SimpleDeNovo_contig_320810	gi|358485511|ref|NC_006088.3_GGA1|	74.05	370	70	20	3	364	654893	655244	5e-40	168	8	S
NorthernBobwhite_SimpleDeNovo_contig_255104	gi|358485511|ref|NC_006088.3_GGA1|	70.47	359	67	16	68	419	655237	654911	4e-29	132	6	S
NorthernBobwhite_SimpleDeNovo_contig_2981	gi|358485511|ref|NC_006088.3_GGA1|	82.37	2507	224	31	2	2312	659146	661630	0	2585	3	S
NorthernBobwhite_SimpleDeNovo_contig_77529	gi|358485511|ref|NC_006088.3_GGA1|	81.33	841	93	24	1	808	659180	658371	0	758	1	S
NorthernBobwhite_SimpleDeNovo_contig_327208	gi|358485511|ref|NC_006088.3_GGA1|	72.68	421	105	2	1	421	662586	662996	1e-61	241	17	M
NorthernBobwhite_SimpleDeNovo_contig_327471	gi|358485511|ref|NC_006088.3_GGA1|	72.8	397	87	8	28	410	662987	662598	5e-53	212	2	M
NorthernBobwhite_SimpleDeNovo_contig_214240	gi|358485511|ref|NC_006088.3_GGA1|	72.51	411	77	9	214	609	662995	662606	1e-56	224	5	M
NorthernBobwhite_SimpleDeNovo_contig_327209	gi|358485511|ref|NC_006088.3_GGA1|	73.39	466	109	5	9	472	663034	662582	2e-71	273	31	M
NorthernBobwhite_SimpleDeNovo_contig_282876	gi|358485511|ref|NC_006088.3_GGA1|	82.27	784	109	7	483	1240	667939	668718	0	783	2	S
NorthernBobwhite_SimpleDeNovo_contig_25630	gi|358485511|ref|NC_006088.3_GGA1|	84.38	2100	272	23	1	2081	668855	670917	0	2255	168	M
NorthernBobwhite_SimpleDeNovo_contig_87173	gi|358485511|ref|NC_006088.3_GGA1|	85.97	1319	129	9	1533	2802	672429	671118	0	1555	2	S
NorthernBobwhite_SimpleDeNovo_contig_160716	gi|358485511|ref|NC_006088.3_GGA1|	79.89	189	31	3	3	188	674296	674480	2e-38	163	2	S
NorthernBobwhite_SimpleDeNovo_contig_173432	gi|358485511|ref|NC_006088.3_GGA1|	82.58	574	86	6	1	570	675199	675762	7e-161	571	1	S
NorthernBobwhite_SimpleDeNovo_contig_87654	gi|358485511|ref|NC_006088.3_GGA1|	76.14	528	94	9	374	895	676050	676551	6e-101	372	1	S
NorthernBobwhite_SimpleDeNovo_contig_210787	gi|358485511|ref|NC_006088.3_GGA1|	80.1	206	38	1	4	206	676496	676701	5e-45	185	6	S
NorthernBobwhite_SimpleDeNovo_contig_285335	gi|358485511|ref|NC_006088.3_GGA1|	80.58	206	37	1	4	206	676496	676701	1e-46	190	6	S
NorthernBobwhite_SimpleDeNovo_contig_280617	gi|358485511|ref|NC_006088.3_GGA1|	86.5	326	35	3	1	317	676770	677095	3e-105	385	1	S
NorthernBobwhite_SimpleDeNovo_contig_81432	gi|358485511|ref|NC_006088.3_GGA1|	80.3	3335	406	42	1	3199	680500	677281	0	3090	1	S
NorthernBobwhite_SimpleDeNovo_contig_222563	gi|358485511|ref|NC_006088.3_GGA1|	82.5	577	73	5	3	570	681365	680808	2e-166	589	1	S
NorthernBobwhite_SimpleDeNovo_contig_29408	gi|358485511|ref|NC_006088.3_GGA1|	77.55	1840	218	21	1	1745	681579	683318	0	1537	4	S
NorthernBobwhite_SimpleDeNovo_contig_134289	gi|358485511|ref|NC_006088.3_GGA1|	82.06	1951	255	19	1472	3341	688215	690151	0	1941	2	S
NorthernBobwhite_SimpleDeNovo_contig_200494	gi|358485511|ref|NC_006088.3_GGA1|	85.41	1809	186	18	1	1755	690376	692160	0	2062	1	S
NorthernBobwhite_SimpleDeNovo_contig_200493	gi|358485511|ref|NC_006088.3_GGA1|	77.75	1357	182	18	150	1404	693663	692325	0	1113	1	S
NorthernBobwhite_SimpleDeNovo_contig_269565	gi|358485511|ref|NC_006088.3_GGA1|	80.76	868	115	11	13	844	694669	695520	0	810	1	S
NorthernBobwhite_SimpleDeNovo_contig_96450	gi|358485511|ref|NC_006088.3_GGA1|	84.93	491	54	2	568	1058	696518	696988	7e-158	562	2	S
NorthernBobwhite_SimpleDeNovo_contig_109712	gi|358485511|ref|NC_006088.3_GGA1|	78.96	808	109	9	1	758	698511	697715	0	706	2	S
NorthernBobwhite_SimpleDeNovo_contig_72130	gi|358485511|ref|NC_006088.3_GGA1|	83.12	557	78	5	542	1084	699496	700050	4e-161	572	2	S
NorthernBobwhite_SimpleDeNovo_contig_57754	gi|358485511|ref|NC_006088.3_GGA1|	76.84	544	81	7	376	888	701758	701229	3e-116	423	2	S
NorthernBobwhite_SimpleDeNovo_contig_200918	gi|358485511|ref|NC_006088.3_GGA1|	78.95	285	46	7	890	1167	705268	704991	2e-56	224	3	S
NorthernBobwhite_SimpleDeNovo_contig_40238	gi|358485511|ref|NC_006088.3_GGA1|	83.26	3458	373	33	2	3287	706312	702889	0	3663	604	M
NorthernBobwhite_SimpleDeNovo_contig_182204	gi|358485511|ref|NC_006088.3_GGA1|	78.98	1679	200	23	1	1541	706724	708387	0	1471	1	S
NorthernBobwhite_SimpleDeNovo_contig_163107	gi|358485511|ref|NC_006088.3_GGA1|	84.31	835	81	16	1	804	708764	709579	0	888	2	S
NorthernBobwhite_SimpleDeNovo_contig_173396	gi|358485511|ref|NC_006088.3_GGA1|	68.67	150	30	6	103	244	708785	708645	0.001	48.2	23	M
NorthernBobwhite_SimpleDeNovo_contig_325672	gi|358485511|ref|NC_006088.3_GGA1|	77.45	306	30	6	11	297	710359	710074	1e-64	250	1	S
NorthernBobwhite_SimpleDeNovo_contig_103873	gi|358485511|ref|NC_006088.3_GGA1|	81.43	1034	112	20	956	1942	712327	713327	0	982	2	S
NorthernBobwhite_SimpleDeNovo_contig_86920	gi|358485511|ref|NC_006088.3_GGA1|	84.76	1595	163	11	1	1585	714953	713429	0	1804	1	S
NorthernBobwhite_SimpleDeNovo_contig_86919	gi|358485511|ref|NC_006088.3_GGA1|	85.68	810	92	11	1	802	715028	715821	0	910	1	S
NorthernBobwhite_SimpleDeNovo_contig_361010	gi|358485511|ref|NC_006088.3_GGA1|	89.57	326	25	2	1	317	717804	718129	6e-120	434	1	S
NorthernBobwhite_SimpleDeNovo_contig_236574	gi|358485511|ref|NC_006088.3_GGA1|	86.92	749	71	9	1	730	717829	717089	0	893	3	S
NorthernBobwhite_SimpleDeNovo_contig_214950	gi|358485511|ref|NC_006088.3_GGA1|	85.9	2751	275	30	1	2687	718104	720805	0	3178	1	S
NorthernBobwhite_SimpleDeNovo_contig_315677	gi|358485511|ref|NC_006088.3_GGA1|	88.04	326	30	2	1	317	718129	717804	2e-113	412	1	S
NorthernBobwhite_SimpleDeNovo_contig_278894	gi|358485511|ref|NC_006088.3_GGA1|	69.44	216	41	12	2888	3096	721097	720900	2e-06	60.8	21	M
NorthernBobwhite_SimpleDeNovo_contig_41116	gi|358485511|ref|NC_006088.3_GGA1|	82.75	8510	990	93	1	8184	729288	720931	0	8740	2	M
NorthernBobwhite_SimpleDeNovo_contig_146426	gi|358485511|ref|NC_006088.3_GGA1|	83.65	1297	139	9	1697	2925	733771	735062	0	1409	2	S
NorthernBobwhite_SimpleDeNovo_contig_210343	gi|358485511|ref|NC_006088.3_GGA1|	83.13	1310	145	15	1560	2796	736535	735229	0	1368	3	S
NorthernBobwhite_SimpleDeNovo_contig_212104	gi|358485511|ref|NC_006088.3_GGA1|	78.49	2008	229	38	21	1948	738672	740556	0	1685	2	S
NorthernBobwhite_SimpleDeNovo_contig_290308	gi|358485511|ref|NC_006088.3_GGA1|	79.95	379	51	8	1	365	742561	742928	8e-88	327	1	S
NorthernBobwhite_SimpleDeNovo_contig_236543	gi|358485511|ref|NC_006088.3_GGA1|	78.99	395	59	6	3	376	742907	743298	3e-89	333	1	S
NorthernBobwhite_SimpleDeNovo_contig_267140	gi|358485511|ref|NC_006088.3_GGA1|	79.16	403	47	8	158	534	743298	742907	4e-93	345	1	S
NorthernBobwhite_SimpleDeNovo_contig_291904	gi|358485511|ref|NC_006088.3_GGA1|	80.57	211	15	4	24	208	744588	744378	8e-50	201	1	S
NorthernBobwhite_SimpleDeNovo_contig_326927	gi|358485511|ref|NC_006088.3_GGA1|	100	22	0	0	805	826	745833	745854	0.5	41	8	M
NorthernBobwhite_SimpleDeNovo_contig_241172	gi|358485511|ref|NC_006088.3_GGA1|	65.93	857	138	33	1	728	745979	745148	6e-55	219	1	S
NorthernBobwhite_SimpleDeNovo_contig_333440	gi|358485511|ref|NC_006088.3_GGA1|	76.76	611	104	7	1	585	746154	746752	8e-129	464	1	S
NorthernBobwhite_SimpleDeNovo_contig_279606	gi|358485511|ref|NC_006088.3_GGA1|	72.39	297	64	5	10	297	746699	746412	2e-37	159	3	S
NorthernBobwhite_SimpleDeNovo_contig_241171	gi|358485511|ref|NC_006088.3_GGA1|	82.7	3086	386	37	1606	4606	748468	751490	0	3124	2	S
NorthernBobwhite_SimpleDeNovo_contig_314749	gi|358485511|ref|NC_006088.3_GGA1|	86.11	36	3	1	337	370	754034	753999	0.24	41	20	M
NorthernBobwhite_SimpleDeNovo_contig_27144	gi|358485511|ref|NC_006088.3_GGA1|	82.86	5041	550	54	5622	10450	759923	754985	0	5236	4	S
NorthernBobwhite_SimpleDeNovo_contig_126777	gi|358485511|ref|NC_006088.3_GGA1|	86.67	30	4	0	253	282	764576	764605	1.6	37.4	10	M
NorthernBobwhite_SimpleDeNovo_contig_57350	gi|358485511|ref|NC_006088.3_GGA1|	92.25	413	31	1	84	495	767378	767790	4e-169	598	1	S
NorthernBobwhite_SimpleDeNovo_contig_234718	gi|358485511|ref|NC_006088.3_GGA1|	85.63	898	104	9	92	976	767380	766495	0	1020	1	S
NorthernBobwhite_SimpleDeNovo_contig_23314	gi|358485511|ref|NC_006088.3_GGA1|	81.79	3651	428	44	6	3563	772679	769173	0	3602	2	S
NorthernBobwhite_SimpleDeNovo_contig_102751	gi|358485511|ref|NC_006088.3_GGA1|	86.53	2976	302	30	1	2930	775678	772756	0	3514	1	S
NorthernBobwhite_SimpleDeNovo_contig_249248	gi|358485511|ref|NC_006088.3_GGA1|	87.18	39	4	1	167	204	779744	779706	0.02	44.6	28	M
NorthernBobwhite_SimpleDeNovo_contig_10284	gi|358485511|ref|NC_006088.3_GGA1|	85.51	5709	525	61	1	5553	781445	775883	0	6565	1	S
NorthernBobwhite_SimpleDeNovo_contig_10285	gi|358485511|ref|NC_006088.3_GGA1|	91.19	2021	159	8	2	2014	781810	783819	0	2823	1	S
NorthernBobwhite_SimpleDeNovo_contig_299738	gi|358485511|ref|NC_006088.3_GGA1|	79.1	421	46	8	1	385	781834	781420	3e-99	365	1	S
NorthernBobwhite_SimpleDeNovo_contig_355343	gi|358485511|ref|NC_006088.3_GGA1|	81	421	38	8	1	385	781834	781420	5e-110	401	1	S
NorthernBobwhite_SimpleDeNovo_contig_309819	gi|358485511|ref|NC_006088.3_GGA1|	88.95	362	36	2	20	381	784053	784410	4e-130	468	1	S
NorthernBobwhite_SimpleDeNovo_contig_208021	gi|358485511|ref|NC_006088.3_GGA1|	80.86	1964	247	27	3	1924	784449	786325	0	1842	1	S
NorthernBobwhite_SimpleDeNovo_contig_212172	gi|358485511|ref|NC_006088.3_GGA1|	83.5	1236	159	17	75	1276	787827	786603	0	1274	1	S
NorthernBobwhite_SimpleDeNovo_contig_9328	gi|358485511|ref|NC_006088.3_GGA1|	86.53	1693	183	13	230	1900	787828	789497	0	2008	2	S
NorthernBobwhite_SimpleDeNovo_contig_10597	gi|358485511|ref|NC_006088.3_GGA1|	84.7	575	57	7	1	551	790505	791072	0	637	1	S
NorthernBobwhite_SimpleDeNovo_contig_100807	gi|358485511|ref|NC_006088.3_GGA1|	75.68	148	26	3	5	150	791145	791284	2e-18	100	1	S
NorthernBobwhite_SimpleDeNovo_contig_263171	gi|358485511|ref|NC_006088.3_GGA1|	82.27	344	30	5	1	330	792129	791803	6e-95	351	1	S
NorthernBobwhite_SimpleDeNovo_contig_161099	gi|358485511|ref|NC_006088.3_GGA1|	88.68	486	41	4	14	496	792434	792908	1e-176	623	1	S
NorthernBobwhite_SimpleDeNovo_contig_229349	gi|358485511|ref|NC_006088.3_GGA1|	82.28	1778	221	21	1	1715	795456	793710	0	1777	2	S
NorthernBobwhite_SimpleDeNovo_contig_197140	gi|358485511|ref|NC_006088.3_GGA1|	76.23	2608	336	63	31	2488	795683	798156	0	1880	3	M
NorthernBobwhite_SimpleDeNovo_contig_58945	gi|358485511|ref|NC_006088.3_GGA1|	75.64	2730	376	54	164	2656	804890	802213	0	1943	4	S
NorthernBobwhite_SimpleDeNovo_contig_215109	gi|358485511|ref|NC_006088.3_GGA1|	78.92	925	122	14	1	882	805243	806137	0	792	1	S
NorthernBobwhite_SimpleDeNovo_contig_55011	gi|358485511|ref|NC_006088.3_GGA1|	86.2	297	37	3	812	1106	806401	806695	1e-91	342	1	S
NorthernBobwhite_SimpleDeNovo_contig_58946	gi|358485511|ref|NC_006088.3_GGA1|	81.46	507	50	11	1	486	806670	807153	8e-134	480	1	S
NorthernBobwhite_SimpleDeNovo_contig_355833	gi|358485511|ref|NC_006088.3_GGA1|	79.94	309	39	6	2	310	806955	806670	4e-71	271	1	S
NorthernBobwhite_SimpleDeNovo_contig_251108	gi|358485511|ref|NC_006088.3_GGA1|	97.76	313	7	0	4	316	807154	807466	9e-150	533	1	S
NorthernBobwhite_SimpleDeNovo_contig_123350	gi|358485511|ref|NC_006088.3_GGA1|	90	30	3	0	324	353	808469	808440	0.17	41	17	M
NorthernBobwhite_SimpleDeNovo_contig_37803	gi|358485511|ref|NC_006088.3_GGA1|	82.49	4221	371	77	3816	7860	811508	807480	0	4266	3	S
NorthernBobwhite_SimpleDeNovo_contig_138888	gi|358485511|ref|NC_006088.3_GGA1|	83.26	3836	457	46	1	3734	814793	818545	0	3983	1	S
NorthernBobwhite_SimpleDeNovo_contig_238072	gi|358485511|ref|NC_006088.3_GGA1|	84.95	392	48	5	9	397	818554	818937	3e-118	428	1	S
NorthernBobwhite_SimpleDeNovo_contig_238071	gi|358485511|ref|NC_006088.3_GGA1|	83.93	392	52	5	9	397	818554	818937	9e-113	410	1	S
NorthernBobwhite_SimpleDeNovo_contig_362412	gi|358485511|ref|NC_006088.3_GGA1|	88.74	373	36	3	1	373	819156	819522	3e-132	475	1	S
NorthernBobwhite_SimpleDeNovo_contig_76723	gi|358485511|ref|NC_006088.3_GGA1|	84.34	7714	796	81	2	7408	819505	827113	0	8471	5	S
NorthernBobwhite_SimpleDeNovo_contig_265249	gi|358485511|ref|NC_006088.3_GGA1|	89.3	374	33	2	8	381	819522	819156	3e-137	491	1	S
NorthernBobwhite_SimpleDeNovo_contig_53508	gi|358485511|ref|NC_006088.3_GGA1|	88.46	1256	117	7	331	1582	831343	832574	0	1606	4	S
NorthernBobwhite_SimpleDeNovo_contig_66269	gi|358485511|ref|NC_006088.3_GGA1|	79.7	5217	680	80	4188	9127	838580	843694	0	4616	3	S
NorthernBobwhite_SimpleDeNovo_contig_265142	gi|358485511|ref|NC_006088.3_GGA1|	79.71	1109	112	22	3	1053	845213	846266	0	989	1	S
NorthernBobwhite_SimpleDeNovo_contig_257660	gi|358485511|ref|NC_006088.3_GGA1|	78.65	89	13	3	25	108	847908	847995	2e-09	68	172	M
NorthernBobwhite_SimpleDeNovo_contig_259082	gi|358485511|ref|NC_006088.3_GGA1|	78.18	55	11	1	497	550	849083	849137	0.073	42.8	17	M
NorthernBobwhite_SimpleDeNovo_contig_46348	gi|358485511|ref|NC_006088.3_GGA1|	85.31	7282	736	74	1735	8802	856626	849465	0	8276	4	S
NorthernBobwhite_SimpleDeNovo_contig_244339	gi|358485511|ref|NC_006088.3_GGA1|	73.88	601	69	16	2	528	858615	858029	2e-104	383	1	S
NorthernBobwhite_SimpleDeNovo_contig_136092	gi|358485511|ref|NC_006088.3_GGA1|	74.42	430	61	8	1	382	858669	859097	7e-76	288	1	S
NorthernBobwhite_SimpleDeNovo_contig_59854	gi|358485511|ref|NC_006088.3_GGA1|	79.57	2486	291	38	7348	9707	870621	873015	0	2217	7	S
NorthernBobwhite_SimpleDeNovo_contig_59853	gi|358485511|ref|NC_006088.3_GGA1|	75.52	384	57	11	2	379	873517	873165	2e-65	253	1	S
NorthernBobwhite_SimpleDeNovo_contig_269743	gi|358485511|ref|NC_006088.3_GGA1|	85.71	42	6	0	580	621	873721	873762	0.0006	50	111	M
NorthernBobwhite_SimpleDeNovo_contig_219867	gi|358485511|ref|NC_006088.3_GGA1|	77.08	349	49	7	3	324	874855	874511	2e-69	266	1	S
NorthernBobwhite_SimpleDeNovo_contig_182625	gi|358485511|ref|NC_006088.3_GGA1|	81.55	2634	311	43	3	2517	874952	877529	0	2524	1	S
NorthernBobwhite_SimpleDeNovo_contig_272768	gi|358485511|ref|NC_006088.3_GGA1|	93.27	416	27	1	7	422	877776	878190	3e-176	621	1	S
NorthernBobwhite_SimpleDeNovo_contig_50262	gi|358485511|ref|NC_006088.3_GGA1|	84.46	3172	352	27	811	3903	881426	878317	0	3503	2	S
NorthernBobwhite_SimpleDeNovo_contig_216433	gi|358485511|ref|NC_006088.3_GGA1|	73.71	795	117	26	34	749	882626	883407	1e-126	457	9	S
NorthernBobwhite_SimpleDeNovo_contig_50261	gi|358485511|ref|NC_006088.3_GGA1|	78.55	979	140	19	282	1221	884328	885275	0	796	1	S
NorthernBobwhite_SimpleDeNovo_contig_202821	gi|358485511|ref|NC_006088.3_GGA1|	87.02	917	92	6	1	914	887160	886268	0	1115	2	S
NorthernBobwhite_SimpleDeNovo_contig_137825	gi|358485511|ref|NC_006088.3_GGA1|	83.43	863	104	10	117	942	888033	887173	0	902	1	S
NorthernBobwhite_SimpleDeNovo_contig_41782	gi|358485511|ref|NC_006088.3_GGA1|	84.12	2544	300	29	2627	5096	890872	893385	0	2729	4	S
NorthernBobwhite_SimpleDeNovo_contig_154041	gi|358485511|ref|NC_006088.3_GGA1|	82.93	41	5	1	199	239	896374	896412	0.18	41	32	M
NorthernBobwhite_SimpleDeNovo_contig_353746	gi|358485511|ref|NC_006088.3_GGA1|	75.74	272	44	6	80	346	897903	897649	2e-45	187	3361	M
NorthernBobwhite_SimpleDeNovo_contig_223400	gi|358485511|ref|NC_006088.3_GGA1|	79.51	283	44	5	14	286	898377	898099	3e-61	239	1	S
NorthernBobwhite_SimpleDeNovo_contig_223402	gi|358485511|ref|NC_006088.3_GGA1|	79.15	283	44	6	14	285	898377	898099	4e-59	232	1	S
NorthernBobwhite_SimpleDeNovo_contig_8654	gi|358485511|ref|NC_006088.3_GGA1|	84.03	3269	373	37	1013	4176	899320	902544	0	3510	5	S
NorthernBobwhite_SimpleDeNovo_contig_184276	gi|358485511|ref|NC_006088.3_GGA1|	83.47	865	98	9	217	1054	907078	906232	0	915	2	S
NorthernBobwhite_SimpleDeNovo_contig_173744	gi|358485511|ref|NC_006088.3_GGA1|	84.82	1904	219	10	1529	3364	908722	910623	0	2149	3	S
NorthernBobwhite_SimpleDeNovo_contig_68349	gi|358485511|ref|NC_006088.3_GGA1|	81.71	1487	173	22	1	1433	910569	912010	0	1445	1	S
NorthernBobwhite_SimpleDeNovo_contig_24865	gi|358485511|ref|NC_006088.3_GGA1|	84.8	2394	242	13	3960	6300	914690	912366	0	2727	4	S
NorthernBobwhite_SimpleDeNovo_contig_7226	gi|358485511|ref|NC_006088.3_GGA1|	79.98	2488	348	35	7826	10213	926892	929329	0	2219	303	M
NorthernBobwhite_SimpleDeNovo_contig_354396	gi|358485511|ref|NC_006088.3_GGA1|	82.63	714	92	16	25	721	930302	929604	0	686	1	S
NorthernBobwhite_SimpleDeNovo_contig_45068	gi|358485511|ref|NC_006088.3_GGA1|	69.65	491	74	15	15	438	930811	930329	2e-53	214	1	S
NorthernBobwhite_SimpleDeNovo_contig_115023	gi|358485511|ref|NC_006088.3_GGA1|	89.28	569	49	5	5	564	930902	931467	0	740	1	S
NorthernBobwhite_SimpleDeNovo_contig_254969	gi|358485511|ref|NC_006088.3_GGA1|	83.66	563	61	7	1	553	932128	931587	5e-169	598	1	S
NorthernBobwhite_SimpleDeNovo_contig_76751	gi|358485511|ref|NC_006088.3_GGA1|	87.03	4311	415	44	3779	8024	937519	933288	0	5185	5	S
NorthernBobwhite_SimpleDeNovo_contig_303457	gi|358485511|ref|NC_006088.3_GGA1|	71.33	143	35	3	5875	6014	941974	941835	9e-08	66.2	20	M
NorthernBobwhite_SimpleDeNovo_contig_131727	gi|358485511|ref|NC_006088.3_GGA1|	83.18	1992	207	26	1288	3210	943251	945183	0	2080	94	M
NorthernBobwhite_SimpleDeNovo_contig_256040	gi|358485511|ref|NC_006088.3_GGA1|	82.54	315	42	4	1	308	950696	951004	4e-84	315	1	S
NorthernBobwhite_SimpleDeNovo_contig_256039	gi|358485511|ref|NC_006088.3_GGA1|	81.99	311	44	4	1	301	950696	951004	3e-80	302	1	S
NorthernBobwhite_SimpleDeNovo_contig_168825	gi|358485511|ref|NC_006088.3_GGA1|	83.14	421	50	2	4	403	950718	950298	1e-124	450	1	S
NorthernBobwhite_SimpleDeNovo_contig_66039	gi|358485511|ref|NC_006088.3_GGA1|	80.14	589	82	10	871	1449	951667	951104	8e-146	522	2	S
NorthernBobwhite_SimpleDeNovo_contig_267915	gi|358485511|ref|NC_006088.3_GGA1|	76.22	328	40	8	61	378	952740	952441	3e-61	239	1	S
NorthernBobwhite_SimpleDeNovo_contig_316704	gi|358485511|ref|NC_006088.3_GGA1|	83.97	312	47	2	1	309	953020	953331	5e-89	331	67	M
NorthernBobwhite_SimpleDeNovo_contig_271921	gi|358485511|ref|NC_006088.3_GGA1|	83.27	771	95	14	15	777	954753	955497	0	776	1	S
NorthernBobwhite_SimpleDeNovo_contig_236893	gi|358485511|ref|NC_006088.3_GGA1|	83.54	328	44	6	384	707	955830	956151	1e-88	331	1	S
NorthernBobwhite_SimpleDeNovo_contig_136628	gi|358485511|ref|NC_006088.3_GGA1|	75.43	822	128	10	1	774	957210	956415	8e-168	594	1	S
NorthernBobwhite_SimpleDeNovo_contig_136627	gi|358485511|ref|NC_006088.3_GGA1|	79.72	2810	385	38	789	3449	958330	961103	0	2493	2	S
NorthernBobwhite_SimpleDeNovo_contig_333371	gi|358485511|ref|NC_006088.3_GGA1|	86.05	43	5	1	175	217	961883	961842	0.001	48.2	464	M
NorthernBobwhite_SimpleDeNovo_contig_53004	gi|358485511|ref|NC_006088.3_GGA1|	80.12	6891	894	96	4191	10725	966220	972990	0	6248	2	S
NorthernBobwhite_SimpleDeNovo_contig_34936	gi|358485511|ref|NC_006088.3_GGA1|	84.49	1328	161	11	925	2215	973787	975106	0	1458	4	S
NorthernBobwhite_SimpleDeNovo_contig_80487	gi|358485511|ref|NC_006088.3_GGA1|	86.39	1976	224	11	4589	6538	981971	983927	0	2342	144	M
NorthernBobwhite_SimpleDeNovo_contig_80486	gi|358485511|ref|NC_006088.3_GGA1|	85.21	534	62	5	1	530	985767	985247	1e-169	600	1	S
NorthernBobwhite_SimpleDeNovo_contig_162260	gi|358485511|ref|NC_006088.3_GGA1|	81.8	1099	111	6	279	1324	987226	988288	0	1133	2	S
NorthernBobwhite_SimpleDeNovo_contig_102854	gi|358485511|ref|NC_006088.3_GGA1|	83.16	2435	282	22	5	2346	993378	990979	0	2571	3	S
NorthernBobwhite_SimpleDeNovo_contig_336927	gi|358485511|ref|NC_006088.3_GGA1|	74.35	425	68	9	1	420	994094	994482	7e-71	271	1	S
NorthernBobwhite_SimpleDeNovo_contig_191736	gi|358485511|ref|NC_006088.3_GGA1|	86.1	633	85	1	12	641	994108	993476	0	744	1	S
NorthernBobwhite_SimpleDeNovo_contig_118454	gi|358485511|ref|NC_006088.3_GGA1|	70.01	697	138	16	293	940	995470	994796	2e-81	307	1	S
NorthernBobwhite_SimpleDeNovo_contig_286163	gi|358485511|ref|NC_006088.3_GGA1|	86.15	563	62	6	1	556	996263	995710	0	652	1	S
NorthernBobwhite_SimpleDeNovo_contig_178187	gi|358485511|ref|NC_006088.3_GGA1|	75.06	453	71	6	1	413	996989	996539	5e-85	318	146	M
NorthernBobwhite_SimpleDeNovo_contig_282575	gi|358485511|ref|NC_006088.3_GGA1|	82.4	642	68	11	7	628	998201	997585	0	639	1	S
NorthernBobwhite_SimpleDeNovo_contig_182890	gi|358485511|ref|NC_006088.3_GGA1|	81.87	1677	191	20	1445	3050	999863	998229	0	1665	6445	M
NorthernBobwhite_SimpleDeNovo_contig_182891	gi|358485511|ref|NC_006088.3_GGA1|	80.76	1050	122	15	4	1031	1001218	1002209	0	987	1	S
NorthernBobwhite_SimpleDeNovo_contig_196570	gi|358485511|ref|NC_006088.3_GGA1|	88.09	470	44	7	1	461	1003130	1002664	4e-162	574	1	S
NorthernBobwhite_SimpleDeNovo_contig_22837	gi|358485511|ref|NC_006088.3_GGA1|	85	3540	347	46	1	3421	1007149	1003675	0	3948	1	S
NorthernBobwhite_SimpleDeNovo_contig_80258	gi|358485511|ref|NC_006088.3_GGA1|	85.86	2419	246	27	1	2368	1007307	1009680	0	2785	3	S
NorthernBobwhite_SimpleDeNovo_contig_245298	gi|358485511|ref|NC_006088.3_GGA1|	73.89	452	80	7	62	502	1014765	1014341	3e-75	286	1	S
NorthernBobwhite_SimpleDeNovo_contig_64100	gi|358485511|ref|NC_006088.3_GGA1|	74.42	3209	418	72	570	3533	1018365	1015315	0	2125	1	S
NorthernBobwhite_SimpleDeNovo_contig_151024	gi|358485511|ref|NC_006088.3_GGA1|	77.45	1973	223	31	86	1853	1018963	1020918	0	1613	3	S
NorthernBobwhite_SimpleDeNovo_contig_96413	gi|358485511|ref|NC_006088.3_GGA1|	89.8	1363	62	16	2332	3680	1027741	1026442	0	1829	17	M
NorthernBobwhite_SimpleDeNovo_contig_23506	gi|358485511|ref|NC_006088.3_GGA1|	81.25	5260	592	46	6433	11399	1035977	1030819	0	5189	2151	M
NorthernBobwhite_SimpleDeNovo_contig_47551	gi|358485511|ref|NC_006088.3_GGA1|	82.99	2281	249	35	3412	5580	1046157	1043904	0	2333	5	S
NorthernBobwhite_SimpleDeNovo_contig_47550	gi|358485511|ref|NC_006088.3_GGA1|	82.46	2583	315	41	3006	5527	1053282	1055787	0	2556	5	S
NorthernBobwhite_SimpleDeNovo_contig_228172	gi|358485511|ref|NC_006088.3_GGA1|	77.96	1175	156	17	1	1102	1057003	1058147	0	967	1	S
NorthernBobwhite_SimpleDeNovo_contig_29821	gi|358485511|ref|NC_006088.3_GGA1|	74.12	1082	130	18	5	946	1058584	1059655	0	744	7	S
NorthernBobwhite_SimpleDeNovo_contig_330572	gi|358485511|ref|NC_006088.3_GGA1|	73.49	464	88	6	7	470	1060208	1060636	9e-76	288	8	S
NorthernBobwhite_SimpleDeNovo_contig_143152	gi|358485511|ref|NC_006088.3_GGA1|	82.67	404	52	5	1	400	1062144	1062533	1e-111	407	1	S
NorthernBobwhite_SimpleDeNovo_contig_143151	gi|358485511|ref|NC_006088.3_GGA1|	81.76	466	66	5	12	471	1062596	1062144	4e-125	452	1	S
NorthernBobwhite_SimpleDeNovo_contig_106698	gi|358485511|ref|NC_006088.3_GGA1|	79.31	2194	282	33	301	2416	1062869	1064968	0	1918	2	M
NorthernBobwhite_SimpleDeNovo_contig_315710	gi|358485511|ref|NC_006088.3_GGA1|	85.75	449	50	4	3	446	1065053	1065492	3e-144	517	1	S
NorthernBobwhite_SimpleDeNovo_contig_245074	gi|358485511|ref|NC_006088.3_GGA1|	74.17	333	50	6	168	469	1065493	1065820	4e-55	219	1	S
NorthernBobwhite_SimpleDeNovo_contig_328906	gi|358485511|ref|NC_006088.3_GGA1|	84.01	319	44	2	18	329	1065930	1066248	2e-92	343	2	S
NorthernBobwhite_SimpleDeNovo_contig_316058	gi|358485511|ref|NC_006088.3_GGA1|	73.21	280	61	6	125	402	1067582	1067849	4e-35	152	5	S
NorthernBobwhite_SimpleDeNovo_contig_163242	gi|358485511|ref|NC_006088.3_GGA1|	70.32	401	92	15	15	407	1068041	1067660	2e-32	143	5	S
NorthernBobwhite_SimpleDeNovo_contig_227456	gi|358485511|ref|NC_006088.3_GGA1|	76.18	1709	229	37	1	1585	1070805	1069151	0	1242	1	S
NorthernBobwhite_SimpleDeNovo_contig_145824	gi|358485511|ref|NC_006088.3_GGA1|	84.43	1336	155	15	18	1318	1073902	1072585	0	1452	2	S
NorthernBobwhite_SimpleDeNovo_contig_88643	gi|358485511|ref|NC_006088.3_GGA1|	94.14	290	17	0	46	335	1074783	1074494	1e-123	446	1	S
NorthernBobwhite_SimpleDeNovo_contig_88642	gi|358485511|ref|NC_006088.3_GGA1|	82.65	1764	194	26	66	1752	1077641	1079369	0	1786	3	S
NorthernBobwhite_SimpleDeNovo_contig_103724	gi|358485511|ref|NC_006088.3_GGA1|	79.22	1160	116	17	1	1127	1083472	1082405	0	1041	1	S
NorthernBobwhite_SimpleDeNovo_contig_31825	gi|358485511|ref|NC_006088.3_GGA1|	73.41	267	71	0	562	828	1084979	1084713	4e-36	161	2	M
NorthernBobwhite_SimpleDeNovo_contig_3807	gi|358485511|ref|NC_006088.3_GGA1|	85.07	1902	192	19	223	2073	1085260	1083400	0	2147	1	S
NorthernBobwhite_SimpleDeNovo_contig_322139	gi|358485511|ref|NC_006088.3_GGA1|	75.63	398	55	10	13	384	1085410	1085791	2e-71	273	1	S
NorthernBobwhite_SimpleDeNovo_contig_3806	gi|358485511|ref|NC_006088.3_GGA1|	77.15	337	44	8	13	332	1085410	1085730	7e-66	255	3	S
NorthernBobwhite_SimpleDeNovo_contig_47470	gi|358485511|ref|NC_006088.3_GGA1|	80.07	1370	153	19	1238	2515	1087365	1086024	0	1263	2	S
NorthernBobwhite_SimpleDeNovo_contig_47471	gi|358485511|ref|NC_006088.3_GGA1|	80.08	1255	137	23	1	1177	1088883	1090102	0	1135	1	S
NorthernBobwhite_SimpleDeNovo_contig_224656	gi|358485511|ref|NC_006088.3_GGA1|	85.49	944	87	11	664	1587	1090866	1091779	0	1081	2	S
NorthernBobwhite_SimpleDeNovo_contig_93552	gi|358485511|ref|NC_006088.3_GGA1|	86.38	5455	508	44	8	5256	1091862	1097287	0	6502	3	S
NorthernBobwhite_SimpleDeNovo_contig_138375	gi|358485511|ref|NC_006088.3_GGA1|	76.25	80	14	2	482	559	1099531	1099607	1e-05	55.4	77	M
NorthernBobwhite_SimpleDeNovo_contig_225300	gi|358485511|ref|NC_006088.3_GGA1|	84.75	59	7	2	532	590	1099605	1099549	2e-06	59	131	M
NorthernBobwhite_SimpleDeNovo_contig_240444	gi|358485511|ref|NC_006088.3_GGA1|	81.19	1366	156	18	1	1284	1100795	1102141	0	1315	1	S
NorthernBobwhite_SimpleDeNovo_contig_136526	gi|358485511|ref|NC_006088.3_GGA1|	87.47	6411	547	51	1	6286	1102362	1108641	0	7943	2	S
NorthernBobwhite_SimpleDeNovo_contig_109161	gi|358485511|ref|NC_006088.3_GGA1|	92.31	26	2	0	324	349	1115526	1115501	0.57	39.2	9	M
NorthernBobwhite_SimpleDeNovo_contig_34068	gi|358485511|ref|NC_006088.3_GGA1|	86.11	7273	685	68	14	7107	1126765	1119639	0	8549	5	M
NorthernBobwhite_SimpleDeNovo_contig_276875	gi|358485511|ref|NC_006088.3_GGA1|	85.66	760	66	7	44	774	1126852	1127597	0	886	1	S
NorthernBobwhite_SimpleDeNovo_contig_166578	gi|358485511|ref|NC_006088.3_GGA1|	84.37	2501	267	34	1	2404	1127749	1130222	0	2706	1	S
NorthernBobwhite_SimpleDeNovo_contig_73427	gi|358485511|ref|NC_006088.3_GGA1|	87.17	787	60	10	1620	2387	1132925	1133689	0	957	3	S
NorthernBobwhite_SimpleDeNovo_contig_243795	gi|358485511|ref|NC_006088.3_GGA1|	84.77	3539	330	38	288	3748	1133914	1137321	0	3970	2	S
NorthernBobwhite_SimpleDeNovo_contig_250757	gi|358485511|ref|NC_006088.3_GGA1|	79.76	2540	326	43	148	2579	1137979	1140438	0	2239	2	S
NorthernBobwhite_SimpleDeNovo_contig_2983	gi|358485511|ref|NC_006088.3_GGA1|	85.9	5511	567	49	1	5428	1142442	1147825	0	6405	3	S
NorthernBobwhite_SimpleDeNovo_contig_109974	gi|358485511|ref|NC_006088.3_GGA1|	85.02	901	108	11	10	897	1150429	1149543	0	991	1	S
NorthernBobwhite_SimpleDeNovo_contig_209025	gi|358485511|ref|NC_006088.3_GGA1|	86.07	359	43	2	4	362	1151525	1151174	2e-115	419	1	S
NorthernBobwhite_SimpleDeNovo_contig_290088	gi|358485511|ref|NC_006088.3_GGA1|	97.25	363	9	1	1	363	1151754	1152115	6e-172	607	1	S
NorthernBobwhite_SimpleDeNovo_contig_150037	gi|358485511|ref|NC_006088.3_GGA1|	96.95	328	10	0	1	328	1154665	1154338	5e-154	547	9	M
NorthernBobwhite_SimpleDeNovo_contig_219964	gi|358485511|ref|NC_006088.3_GGA1|	96.82	440	14	0	1	440	1154790	1155229	0	731	12	M
NorthernBobwhite_SimpleDeNovo_contig_215020	gi|358485511|ref|NC_006088.3_GGA1|	83.86	1456	157	18	699	2120	1156681	1155270	0	1555	2	S
NorthernBobwhite_SimpleDeNovo_contig_21978	gi|358485511|ref|NC_006088.3_GGA1|	83.08	1336	175	14	1	1327	1158612	1157319	0	1373	1	S
NorthernBobwhite_SimpleDeNovo_contig_39076	gi|358485511|ref|NC_006088.3_GGA1|	81.63	3973	531	37	1	3871	1164076	1160201	0	3887	2	S
NorthernBobwhite_SimpleDeNovo_contig_275935	gi|358485511|ref|NC_006088.3_GGA1|	85.57	714	70	5	1	682	1164152	1164864	0	830	1	S
NorthernBobwhite_SimpleDeNovo_contig_268523	gi|358485511|ref|NC_006088.3_GGA1|	82	411	62	5	1	401	1165019	1165427	2e-108	396	1	S
NorthernBobwhite_SimpleDeNovo_contig_5534	gi|358485511|ref|NC_006088.3_GGA1|	84.42	3345	365	37	4	3248	1165579	1168867	0	3658	3	S
NorthernBobwhite_SimpleDeNovo_contig_284095	gi|358485511|ref|NC_006088.3_GGA1|	78.1	411	73	4	2	397	1171166	1170758	2e-89	333	1	S
NorthernBobwhite_SimpleDeNovo_contig_284096	gi|358485511|ref|NC_006088.3_GGA1|	81.27	411	71	3	2	408	1171166	1170758	1e-105	387	1	S
NorthernBobwhite_SimpleDeNovo_contig_201125	gi|358485511|ref|NC_006088.3_GGA1|	88.24	34	4	0	1677	1710	1173942	1173975	0.13	44.6	10	M
NorthernBobwhite_SimpleDeNovo_contig_45541	gi|358485511|ref|NC_006088.3_GGA1|	84.41	4202	478	31	2847	6917	1175297	1171142	0	4644	2	S
NorthernBobwhite_SimpleDeNovo_contig_60820	gi|358485511|ref|NC_006088.3_GGA1|	80.59	1597	182	18	1	1486	1178342	1179921	0	1517	1	S
NorthernBobwhite_SimpleDeNovo_contig_44352	gi|358485511|ref|NC_006088.3_GGA1|	87.15	3355	353	24	11	3314	1179925	1183252	0	4069	2	S
NorthernBobwhite_SimpleDeNovo_contig_69117	gi|358485511|ref|NC_006088.3_GGA1|	82.57	1916	271	21	1	1869	1184722	1186621	0	1939	515	M
NorthernBobwhite_SimpleDeNovo_contig_358246	gi|358485511|ref|NC_006088.3_GGA1|	74.02	408	41	8	1	389	1188612	1188973	1e-73	280	10521	M
NorthernBobwhite_SimpleDeNovo_contig_249975	gi|358485511|ref|NC_006088.3_GGA1|	83.44	815	87	11	8	808	1188630	1187850	0	856	2	S
NorthernBobwhite_SimpleDeNovo_contig_325732	gi|358485511|ref|NC_006088.3_GGA1|	74.15	410	41	8	1	391	1188975	1188612	9e-75	284	10561	M
NorthernBobwhite_SimpleDeNovo_contig_145678	gi|358485511|ref|NC_006088.3_GGA1|	84.36	1253	146	12	3	1212	1189244	1190489	0	1368	1	S
NorthernBobwhite_SimpleDeNovo_contig_363773	gi|358485511|ref|NC_006088.3_GGA1|	79.06	339	37	4	1	305	1191825	1192163	7e-81	304	1	S
NorthernBobwhite_SimpleDeNovo_contig_208531	gi|358485511|ref|NC_006088.3_GGA1|	85.84	1017	106	7	3	1005	1191848	1190856	0	1187	1	S
NorthernBobwhite_SimpleDeNovo_contig_225049	gi|358485511|ref|NC_006088.3_GGA1|	84.54	485	53	3	1	463	1192309	1191825	7e-153	544	1	S
NorthernBobwhite_SimpleDeNovo_contig_118548	gi|358485511|ref|NC_006088.3_GGA1|	85.95	2577	289	15	1	2523	1193265	1195822	0	3014	1	S
NorthernBobwhite_SimpleDeNovo_contig_325294	gi|358485511|ref|NC_006088.3_GGA1|	88.58	578	56	6	3	575	1196684	1196112	0	728	1	S
NorthernBobwhite_SimpleDeNovo_contig_282806	gi|358485511|ref|NC_006088.3_GGA1|	81.74	597	82	6	3	579	1197219	1197808	1e-164	583	1713	M
NorthernBobwhite_SimpleDeNovo_contig_160449	gi|358485511|ref|NC_006088.3_GGA1|	79.64	447	81	4	1	442	1197884	1198325	1e-105	387	1	S
NorthernBobwhite_SimpleDeNovo_contig_160448	gi|358485511|ref|NC_006088.3_GGA1|	81.77	532	60	5	2	507	1198841	1198321	1e-149	533	1	S
NorthernBobwhite_SimpleDeNovo_contig_213739	gi|358485511|ref|NC_006088.3_GGA1|	84.74	1343	139	8	1	1297	1200181	1198859	0	1521	1	S
NorthernBobwhite_SimpleDeNovo_contig_6492	gi|358485511|ref|NC_006088.3_GGA1|	84.53	7486	876	64	3509	10806	1203432	1210823	0	8246	3	M
NorthernBobwhite_SimpleDeNovo_contig_227320	gi|358485511|ref|NC_006088.3_GGA1|	78.83	392	54	6	5	367	1210802	1211193	2e-89	333	1	S
NorthernBobwhite_SimpleDeNovo_contig_292642	gi|358485511|ref|NC_006088.3_GGA1|	79.34	392	52	6	5	367	1210802	1211193	4e-92	342	1	S
NorthernBobwhite_SimpleDeNovo_contig_232749	gi|358485511|ref|NC_006088.3_GGA1|	85.43	652	74	5	12	644	1211190	1211839	0	744	1	S
NorthernBobwhite_SimpleDeNovo_contig_29954	gi|358485511|ref|NC_006088.3_GGA1|	83.75	3434	362	28	1	3380	1211937	1215228	0	3728	1	S
NorthernBobwhite_SimpleDeNovo_contig_329139	gi|358485511|ref|NC_006088.3_GGA1|	72.13	122	25	6	606	720	1215521	1215640	0.006	48.2	16	M
NorthernBobwhite_SimpleDeNovo_contig_266272	gi|358485511|ref|NC_006088.3_GGA1|	79.64	329	44	6	2	312	1216430	1216107	2e-75	286	1	S
NorthernBobwhite_SimpleDeNovo_contig_103282	gi|358485511|ref|NC_006088.3_GGA1|	85.72	1345	166	6	1	1327	1219872	1218536	0	1557	2	S
NorthernBobwhite_SimpleDeNovo_contig_103283	gi|358485511|ref|NC_006088.3_GGA1|	82.56	1118	139	12	5	1111	1219959	1221031	0	1133	1	S
NorthernBobwhite_SimpleDeNovo_contig_73858	gi|358485511|ref|NC_006088.3_GGA1|	82.95	1273	155	15	1084	2312	1222179	1223433	0	1306	3	S
NorthernBobwhite_SimpleDeNovo_contig_182837	gi|358485511|ref|NC_006088.3_GGA1|	84.02	2028	237	16	783	2752	1224417	1226415	0	2203	3	S
NorthernBobwhite_SimpleDeNovo_contig_73206	gi|358485511|ref|NC_006088.3_GGA1|	83.06	3471	385	37	5	3357	1232102	1228717	0	3626	1	S
NorthernBobwhite_SimpleDeNovo_contig_163795	gi|358485511|ref|NC_006088.3_GGA1|	81.43	1863	277	14	1205	3030	1235331	1233501	0	1799	20	M
NorthernBobwhite_SimpleDeNovo_contig_35934	gi|358485511|ref|NC_006088.3_GGA1|	84.6	2344	241	21	1501	3781	1237527	1239813	0	2614	4	S
NorthernBobwhite_SimpleDeNovo_contig_260118	gi|358485511|ref|NC_006088.3_GGA1|	83.52	358	50	3	127	475	1239810	1240167	8e-102	374	1	S
NorthernBobwhite_SimpleDeNovo_contig_58488	gi|358485511|ref|NC_006088.3_GGA1|	84.81	362	51	2	127	484	1239810	1240171	2e-109	399	1	S
NorthernBobwhite_SimpleDeNovo_contig_143094	gi|358485511|ref|NC_006088.3_GGA1|	82.46	1636	190	12	1754	3310	1241766	1240149	0	1691	2	S
NorthernBobwhite_SimpleDeNovo_contig_143032	gi|358485511|ref|NC_006088.3_GGA1|	83.24	525	68	4	1	521	1243074	1243582	6e-155	551	1	S
NorthernBobwhite_SimpleDeNovo_contig_278377	gi|358485511|ref|NC_006088.3_GGA1|	83.58	615	81	4	1	611	1243672	1243074	0	654	1	S
NorthernBobwhite_SimpleDeNovo_contig_205868	gi|358485511|ref|NC_006088.3_GGA1|	84.54	692	83	4	1126	1804	1245202	1244522	0	769	4	S
NorthernBobwhite_SimpleDeNovo_contig_25177	gi|358485511|ref|NC_006088.3_GGA1|	86.32	950	120	2	1	940	1247655	1246706	0	1128	1	S
NorthernBobwhite_SimpleDeNovo_contig_205869	gi|358485511|ref|NC_006088.3_GGA1|	85.29	435	38	4	1	418	1247947	1248372	4e-140	502	2	S
NorthernBobwhite_SimpleDeNovo_contig_25176	gi|358485511|ref|NC_006088.3_GGA1|	88.8	509	53	2	1	505	1249137	1249645	0	655	1	S
NorthernBobwhite_SimpleDeNovo_contig_181166	gi|358485511|ref|NC_006088.3_GGA1|	86.7	4007	388	36	1	3934	1249802	1253736	0	4792	1	S
NorthernBobwhite_SimpleDeNovo_contig_39985	gi|358485511|ref|NC_006088.3_GGA1|	86.61	1979	195	14	1327	3248	1257644	1255679	0	2374	4	S
NorthernBobwhite_SimpleDeNovo_contig_71731	gi|358485511|ref|NC_006088.3_GGA1|	85.86	3861	359	31	29	3788	1258804	1262578	0	4531	1	S
NorthernBobwhite_SimpleDeNovo_contig_231981	gi|358485511|ref|NC_006088.3_GGA1|	77.81	374	70	3	8	368	1263037	1263410	4e-79	298	1	S
NorthernBobwhite_SimpleDeNovo_contig_335956	gi|358485511|ref|NC_006088.3_GGA1|	77.31	379	70	4	8	375	1263037	1263410	2e-77	293	1	S
NorthernBobwhite_SimpleDeNovo_contig_96323	gi|358485511|ref|NC_006088.3_GGA1|	83.05	2436	307	29	728	3141	1265986	1263635	0	2502	4553	M
NorthernBobwhite_SimpleDeNovo_contig_84583	gi|358485511|ref|NC_006088.3_GGA1|	80.57	247	35	1	12	258	1266498	1266265	1e-60	237	1	S
NorthernBobwhite_SimpleDeNovo_contig_84584	gi|358485511|ref|NC_006088.3_GGA1|	78.54	247	40	1	12	258	1266498	1266265	1e-53	214	1	S
NorthernBobwhite_SimpleDeNovo_contig_89406	gi|358485511|ref|NC_006088.3_GGA1|	83.03	3034	361	28	12	2928	1266583	1269579	0	3162	1	S
NorthernBobwhite_SimpleDeNovo_contig_151933	gi|358485511|ref|NC_006088.3_GGA1|	84.62	3876	484	40	3	3808	1270022	1273855	0	4224	11	M
NorthernBobwhite_SimpleDeNovo_contig_281265	gi|358485511|ref|NC_006088.3_GGA1|	80.7	342	40	4	2	321	1270044	1269707	2e-87	325	1	S
NorthernBobwhite_SimpleDeNovo_contig_302047	gi|358485511|ref|NC_006088.3_GGA1|	85.38	342	46	2	2	343	1270044	1269707	9e-106	387	1	S
NorthernBobwhite_SimpleDeNovo_contig_252489	gi|358485511|ref|NC_006088.3_GGA1|	87.16	1480	131	11	144	1568	1277282	1278757	0	1817	1	S
NorthernBobwhite_SimpleDeNovo_contig_257640	gi|358485511|ref|NC_006088.3_GGA1|	87.23	1880	193	7	1	1847	1278907	1280772	0	2320	1	S
NorthernBobwhite_SimpleDeNovo_contig_144627	gi|358485511|ref|NC_006088.3_GGA1|	83.77	1731	216	13	1007	2692	1283136	1281426	0	1855	2303	M
NorthernBobwhite_SimpleDeNovo_contig_74734	gi|358485511|ref|NC_006088.3_GGA1|	84.75	1095	133	8	1	1062	1284407	1283314	0	1216	1	S
NorthernBobwhite_SimpleDeNovo_contig_144626	gi|358485511|ref|NC_006088.3_GGA1|	86.3	1467	145	11	1	1446	1284465	1285896	0	1741	1	S
NorthernBobwhite_SimpleDeNovo_contig_166850	gi|358485511|ref|NC_006088.3_GGA1|	85.51	1284	110	10	2460	3686	1289254	1290518	0	1501	5093	M
NorthernBobwhite_SimpleDeNovo_contig_69032	gi|358485511|ref|NC_006088.3_GGA1|	83.36	559	69	6	486	1035	1292996	1292453	3e-164	583	3444	M
NorthernBobwhite_SimpleDeNovo_contig_233137	gi|358485511|ref|NC_006088.3_GGA1|	84.66	652	77	5	1275	1912	1294983	1294341	0	724	4	S
NorthernBobwhite_SimpleDeNovo_contig_24082	gi|358485511|ref|NC_006088.3_GGA1|	79.29	1067	125	11	1361	2342	1298787	1299842	0	966	3	S
NorthernBobwhite_SimpleDeNovo_contig_101773	gi|358485511|ref|NC_006088.3_GGA1|	78.77	1267	109	22	2	1121	1303075	1301822	0	1117	3	S
NorthernBobwhite_SimpleDeNovo_contig_62643	gi|358485511|ref|NC_006088.3_GGA1|	88.03	610	44	8	12	612	1303121	1303710	0	762	1	S
NorthernBobwhite_SimpleDeNovo_contig_31625	gi|358485511|ref|NC_006088.3_GGA1|	74.04	2061	298	45	835	2713	1307226	1305221	0	1315	3	S
NorthernBobwhite_SimpleDeNovo_contig_254345	gi|358485511|ref|NC_006088.3_GGA1|	86.42	729	80	4	1	712	1308916	1309642	0	868	1	S
NorthernBobwhite_SimpleDeNovo_contig_34452	gi|358485511|ref|NC_006088.3_GGA1|	82.49	5751	743	67	1	5591	1310464	1316110	0	5768	1111	M
NorthernBobwhite_SimpleDeNovo_contig_67173	gi|358485511|ref|NC_006088.3_GGA1|	88.24	34	3	1	309	341	1315310	1315343	0.15	41	192	M
NorthernBobwhite_SimpleDeNovo_contig_210186	gi|358485511|ref|NC_006088.3_GGA1|	86.45	2990	298	23	3	2914	1320130	1317170	0	3559	84	M
NorthernBobwhite_SimpleDeNovo_contig_238651	gi|358485511|ref|NC_006088.3_GGA1|	84.59	1272	115	15	547	1764	1321599	1322843	0	1416	2	S
NorthernBobwhite_SimpleDeNovo_contig_262959	gi|358485511|ref|NC_006088.3_GGA1|	84.94	591	67	7	2	573	1322951	1323538	0	654	1	S
NorthernBobwhite_SimpleDeNovo_contig_8941	gi|358485511|ref|NC_006088.3_GGA1|	84.49	1612	204	13	65	1657	1323942	1325526	0	1763	59	M
NorthernBobwhite_SimpleDeNovo_contig_166204	gi|358485511|ref|NC_006088.3_GGA1|	87.65	3279	272	30	1	3218	1325585	1328791	0	4073	1	S
NorthernBobwhite_SimpleDeNovo_contig_245923	gi|358485511|ref|NC_006088.3_GGA1|	80	255	37	3	113	353	1329164	1328910	2e-58	230	3	M
NorthernBobwhite_SimpleDeNovo_contig_224043	gi|358485511|ref|NC_006088.3_GGA1|	89.8	3481	287	14	3	3449	1329689	1333135	0	4675	1	S
NorthernBobwhite_SimpleDeNovo_contig_238205	gi|358485511|ref|NC_006088.3_GGA1|	84.33	2208	236	20	1	2120	1333272	1335457	0	2432	1	S
NorthernBobwhite_SimpleDeNovo_contig_271883	gi|358485511|ref|NC_006088.3_GGA1|	85.22	758	87	3	1	735	1335640	1336395	0	872	2	S
NorthernBobwhite_SimpleDeNovo_contig_308210	gi|358485511|ref|NC_006088.3_GGA1|	92.69	342	17	2	2	336	1337696	1337356	2e-140	502	1	S
NorthernBobwhite_SimpleDeNovo_contig_319095	gi|358485511|ref|NC_006088.3_GGA1|	94.75	305	16	0	1	305	1338021	1338325	2e-133	479	1	S
NorthernBobwhite_SimpleDeNovo_contig_319094	gi|358485511|ref|NC_006088.3_GGA1|	92.54	429	30	1	1	429	1338726	1338300	7e-178	627	1	S
NorthernBobwhite_SimpleDeNovo_contig_272228	gi|358485511|ref|NC_006088.3_GGA1|	96.83	379	10	2	1	377	1339773	1340151	8e-177	623	1	S
NorthernBobwhite_SimpleDeNovo_contig_89309	gi|358485511|ref|NC_006088.3_GGA1|	89.36	6063	477	31	18	5974	1340733	1346733	0	8038	2	S
NorthernBobwhite_SimpleDeNovo_contig_174574	gi|358485511|ref|NC_006088.3_GGA1|	84.66	2366	251	18	3	2299	1350621	1352943	0	2650	1	S
NorthernBobwhite_SimpleDeNovo_contig_233923	gi|358485511|ref|NC_006088.3_GGA1|	86.57	1527	143	13	1	1508	1353012	1354495	0	1828	2	S
NorthernBobwhite_SimpleDeNovo_contig_228782	gi|358485511|ref|NC_006088.3_GGA1|	94.44	36	2	0	523	558	1356680	1356645	8e-06	57.2	241	M
NorthernBobwhite_SimpleDeNovo_contig_101366	gi|358485511|ref|NC_006088.3_GGA1|	87.43	1878	166	11	2096	3940	1357205	1355365	0	2336	2	S
NorthernBobwhite_SimpleDeNovo_contig_223468	gi|358485511|ref|NC_006088.3_GGA1|	88.89	36	2	2	8	43	1358637	1358604	0.16	41	35	M
NorthernBobwhite_SimpleDeNovo_contig_145065	gi|358485511|ref|NC_006088.3_GGA1|	87.71	1579	176	5	69	1633	1361131	1359557	0	1966	1	S
NorthernBobwhite_SimpleDeNovo_contig_145066	gi|358485511|ref|NC_006088.3_GGA1|	77.41	2072	276	34	19	1939	1361547	1363577	0	1647	62	M
NorthernBobwhite_SimpleDeNovo_contig_21303	gi|358485511|ref|NC_006088.3_GGA1|	87	1807	193	13	1	1781	1365437	1363647	0	2179	1	S
NorthernBobwhite_SimpleDeNovo_contig_309845	gi|358485511|ref|NC_006088.3_GGA1|	81.67	540	65	7	3	511	1366027	1365491	6e-148	527	1	S
NorthernBobwhite_SimpleDeNovo_contig_202960	gi|358485511|ref|NC_006088.3_GGA1|	96	25	1	0	217	241	1366101	1366077	0.23	41	11	M
NorthernBobwhite_SimpleDeNovo_contig_5979	gi|358485511|ref|NC_006088.3_GGA1|	84.84	2849	251	31	803	3585	1369287	1366554	0	3214	2	S
NorthernBobwhite_SimpleDeNovo_contig_5978	gi|358485511|ref|NC_006088.3_GGA1|	88.93	533	51	4	1	530	1370247	1370774	0	684	1	S
NorthernBobwhite_SimpleDeNovo_contig_218203	gi|358485511|ref|NC_006088.3_GGA1|	85.06	1560	112	17	1	1483	1370995	1372510	0	1795	1	S
NorthernBobwhite_SimpleDeNovo_contig_13050	gi|358485511|ref|NC_006088.3_GGA1|	86.68	4152	358	40	1	4040	1382324	1378256	0	4991	1365	M
NorthernBobwhite_SimpleDeNovo_contig_18140	gi|358485511|ref|NC_006088.3_GGA1|	85.92	1634	160	17	1446	3042	1383793	1385393	0	1896	1558	M
NorthernBobwhite_SimpleDeNovo_contig_78983	gi|358485511|ref|NC_006088.3_GGA1|	82.39	653	85	6	1369	2000	1388790	1389433	0	659	7779	M
NorthernBobwhite_SimpleDeNovo_contig_226817	gi|358485511|ref|NC_006088.3_GGA1|	89.72	1196	103	8	1	1184	1390867	1389680	0	1584	1	S
NorthernBobwhite_SimpleDeNovo_contig_90788	gi|358485511|ref|NC_006088.3_GGA1|	90.31	795	69	6	19	809	1390987	1391777	0	1067	1	S
NorthernBobwhite_SimpleDeNovo_contig_263882	gi|358485511|ref|NC_006088.3_GGA1|	79.8	1005	118	15	1	966	1392829	1391871	0	906	1	S
NorthernBobwhite_SimpleDeNovo_contig_50961	gi|358485511|ref|NC_006088.3_GGA1|	85.89	1354	145	12	52	1375	1396374	1395037	0	1568	3	S
NorthernBobwhite_SimpleDeNovo_contig_127369	gi|358485511|ref|NC_006088.3_GGA1|	84.65	4580	524	47	4751	9203	1401728	1406255	0	5039	610	M
NorthernBobwhite_SimpleDeNovo_contig_99966	gi|358485511|ref|NC_006088.3_GGA1|	77.51	378	53	7	36	388	1407022	1406652	2e-78	297	1	S
NorthernBobwhite_SimpleDeNovo_contig_284713	gi|358485511|ref|NC_006088.3_GGA1|	90.12	1215	106	7	25	1230	1408318	1407109	0	1631	1	S
NorthernBobwhite_SimpleDeNovo_contig_99967	gi|358485511|ref|NC_006088.3_GGA1|	89.29	878	80	4	1	865	1408467	1409343	0	1155	36	M
NorthernBobwhite_SimpleDeNovo_contig_334251	gi|358485511|ref|NC_006088.3_GGA1|	82.29	367	53	4	1	358	1409321	1409684	4e-98	361	1	S
NorthernBobwhite_SimpleDeNovo_contig_340063	gi|358485511|ref|NC_006088.3_GGA1|	80.43	368	59	4	1	359	1409321	1409684	2e-89	333	1	S
NorthernBobwhite_SimpleDeNovo_contig_174140	gi|358485511|ref|NC_006088.3_GGA1|	84.53	2249	248	36	1	2187	1412343	1410133	0	2415	2	S
NorthernBobwhite_SimpleDeNovo_contig_72263	gi|358485511|ref|NC_006088.3_GGA1|	85.98	3666	365	31	2809	6403	1416036	1412449	0	4289	71	M
NorthernBobwhite_SimpleDeNovo_contig_22167	gi|358485511|ref|NC_006088.3_GGA1|	88.35	1829	155	13	585	2386	1419831	1418034	0	2333	2	S
NorthernBobwhite_SimpleDeNovo_contig_22169	gi|358485511|ref|NC_006088.3_GGA1|	82.4	392	52	4	1	379	1420708	1421095	7e-108	394	1	S
NorthernBobwhite_SimpleDeNovo_contig_22168	gi|358485511|ref|NC_006088.3_GGA1|	84.44	392	49	3	1	384	1420708	1421095	1e-118	430	1	S
NorthernBobwhite_SimpleDeNovo_contig_739	gi|358485511|ref|NC_006088.3_GGA1|	87.32	3053	285	23	36	3028	1424083	1421073	0	3750	1	S
NorthernBobwhite_SimpleDeNovo_contig_152602	gi|358485511|ref|NC_006088.3_GGA1|	85.5	1076	132	8	1	1064	1426490	1425427	0	1223	3	S
NorthernBobwhite_SimpleDeNovo_contig_217193	gi|358485511|ref|NC_006088.3_GGA1|	83.5	309	42	4	1	304	1426814	1427118	3e-85	318	1	S
NorthernBobwhite_SimpleDeNovo_contig_167692	gi|358485511|ref|NC_006088.3_GGA1|	85.23	325	33	3	1	325	1426839	1426530	7e-101	370	1	S
NorthernBobwhite_SimpleDeNovo_contig_12399	gi|358485511|ref|NC_006088.3_GGA1|	85.05	8743	928	91	4578	13056	1435723	1427096	0	9806	4	M
NorthernBobwhite_SimpleDeNovo_contig_47055	gi|358485511|ref|NC_006088.3_GGA1|	87.57	539	58	4	1	532	1440233	1440769	0	661	1	S
NorthernBobwhite_SimpleDeNovo_contig_108837	gi|358485511|ref|NC_006088.3_GGA1|	91.63	454	30	1	1	454	1441173	1441618	0	650	20	M
NorthernBobwhite_SimpleDeNovo_contig_107138	gi|358485511|ref|NC_006088.3_GGA1|	89.3	1149	108	4	2	1141	1442605	1443747	0	1514	2	S
NorthernBobwhite_SimpleDeNovo_contig_168460	gi|358485511|ref|NC_006088.3_GGA1|	80.89	403	58	5	5	398	1446107	1445715	7e-102	374	1	S
NorthernBobwhite_SimpleDeNovo_contig_46686	gi|358485511|ref|NC_006088.3_GGA1|	86.71	3010	290	22	740	3698	1450914	1447964	0	3626	3	S
NorthernBobwhite_SimpleDeNovo_contig_46685	gi|358485511|ref|NC_006088.3_GGA1|	85.26	1838	217	16	25	1834	1451568	1453379	0	2069	6	M
NorthernBobwhite_SimpleDeNovo_contig_56011	gi|358485511|ref|NC_006088.3_GGA1|	87.09	364	46	1	1	363	1464014	1464377	9e-122	441	1	S
NorthernBobwhite_SimpleDeNovo_contig_281562	gi|358485511|ref|NC_006088.3_GGA1|	94.08	338	18	2	1	337	1464585	1464921	9e-144	513	1	S
NorthernBobwhite_SimpleDeNovo_contig_72210	gi|358485511|ref|NC_006088.3_GGA1|	87.89	1734	134	15	1267	2955	1466502	1468204	0	2181	3	S
NorthernBobwhite_SimpleDeNovo_contig_42365	gi|358485511|ref|NC_006088.3_GGA1|	88.78	1854	179	11	611	2460	1471741	1469913	0	2383	4956	M
NorthernBobwhite_SimpleDeNovo_contig_101867	gi|358485511|ref|NC_006088.3_GGA1|	89.78	1125	99	7	5	1118	1472932	1474051	0	1494	1	S
NorthernBobwhite_SimpleDeNovo_contig_48160	gi|358485511|ref|NC_006088.3_GGA1|	86.04	2270	239	20	1	2221	1476584	1474344	0	2645	1	S
NorthernBobwhite_SimpleDeNovo_contig_22874	gi|358485511|ref|NC_006088.3_GGA1|	83.64	2903	314	29	1	2828	1479474	1476658	0	3108	1	S
NorthernBobwhite_SimpleDeNovo_contig_181247	gi|358485511|ref|NC_006088.3_GGA1|	86.99	1045	97	8	748	1792	1480542	1479537	0	1270	2	S
NorthernBobwhite_SimpleDeNovo_contig_197501	gi|358485511|ref|NC_006088.3_GGA1|	87.86	1219	135	5	862	2074	1483383	1482172	0	1521	1398	M
NorthernBobwhite_SimpleDeNovo_contig_64946	gi|358485511|ref|NC_006088.3_GGA1|	84.69	490	62	6	58	545	1489998	1490476	5e-149	531	1	S
NorthernBobwhite_SimpleDeNovo_contig_27770	gi|358485511|ref|NC_006088.3_GGA1|	85	3434	401	29	70	3447	1490001	1486626	0	3844	226	M
NorthernBobwhite_SimpleDeNovo_contig_265111	gi|358485511|ref|NC_006088.3_GGA1|	76.87	441	47	7	2	388	1490458	1490897	6e-96	354	1	S
NorthernBobwhite_SimpleDeNovo_contig_209429	gi|358485511|ref|NC_006088.3_GGA1|	75.39	386	42	6	27	359	1490837	1490452	2e-76	289	1	S
NorthernBobwhite_SimpleDeNovo_contig_24449	gi|358485511|ref|NC_006088.3_GGA1|	85.44	721	81	3	556	1256	1491608	1490892	0	836	2	S
NorthernBobwhite_SimpleDeNovo_contig_357300	gi|358485511|ref|NC_006088.3_GGA1|	78.24	363	66	4	7	361	1492329	1492686	2e-77	293	1	S
NorthernBobwhite_SimpleDeNovo_contig_40181	gi|358485511|ref|NC_006088.3_GGA1|	87.82	731	70	4	1	726	1493477	1492761	0	917	1	S
NorthernBobwhite_SimpleDeNovo_contig_24448	gi|358485511|ref|NC_006088.3_GGA1|	84.42	2445	238	26	2	2338	1493975	1496384	0	2704	1	S
NorthernBobwhite_SimpleDeNovo_contig_119200	gi|358485511|ref|NC_006088.3_GGA1|	84.03	313	44	1	1	307	1493999	1493687	1e-91	340	1	S
NorthernBobwhite_SimpleDeNovo_contig_170804	gi|358485511|ref|NC_006088.3_GGA1|	84.03	313	44	1	1	307	1493999	1493687	1e-91	340	1	S
NorthernBobwhite_SimpleDeNovo_contig_170805	gi|358485511|ref|NC_006088.3_GGA1|	85.45	2921	306	25	84	2953	1496464	1499316	0	3346	2	S
NorthernBobwhite_SimpleDeNovo_contig_10673	gi|358485511|ref|NC_006088.3_GGA1|	92.4	1815	127	7	260	2071	1505607	1503801	0	2630	2	S
NorthernBobwhite_SimpleDeNovo_contig_273904	gi|358485511|ref|NC_006088.3_GGA1|	82.92	644	65	8	3	641	1508011	1508614	0	670	1	S
NorthernBobwhite_SimpleDeNovo_contig_273905	gi|358485511|ref|NC_006088.3_GGA1|	89.9	1426	96	11	12	1407	1508013	1506606	0	1916	1	S
NorthernBobwhite_SimpleDeNovo_contig_79334	gi|358485511|ref|NC_006088.3_GGA1|	88.32	1096	114	5	35	1128	1508618	1509701	0	1389	2	S
NorthernBobwhite_SimpleDeNovo_contig_121228	gi|358485511|ref|NC_006088.3_GGA1|	82.57	2312	284	24	1	2232	1510903	1513175	0	2352	11	M
NorthernBobwhite_SimpleDeNovo_contig_277683	gi|358485511|ref|NC_006088.3_GGA1|	83.65	1975	244	17	1	1904	1513485	1515451	0	2100	1	S
NorthernBobwhite_SimpleDeNovo_contig_48321	gi|358485511|ref|NC_006088.3_GGA1|	86.01	2701	290	21	630	3318	1518964	1516340	0	3151	939	M
NorthernBobwhite_SimpleDeNovo_contig_221200	gi|358485511|ref|NC_006088.3_GGA1|	85.92	277	37	1	6	280	1520333	1520609	3e-86	322	1	S
NorthernBobwhite_SimpleDeNovo_contig_339462	gi|358485511|ref|NC_006088.3_GGA1|	83.83	266	35	4	64	323	1520667	1520930	4e-72	275	2	M
NorthernBobwhite_SimpleDeNovo_contig_358998	gi|358485511|ref|NC_006088.3_GGA1|	85.07	268	32	4	56	317	1520667	1520932	2e-77	293	11	M
NorthernBobwhite_SimpleDeNovo_contig_81598	gi|358485511|ref|NC_006088.3_GGA1|	84.01	5198	624	65	1	5073	1529022	1523907	0	5521	3	S
NorthernBobwhite_SimpleDeNovo_contig_369651	gi|358485511|ref|NC_006088.3_GGA1|	74.12	340	56	4	7	323	1529337	1529007	5e-58	228	1	S
NorthernBobwhite_SimpleDeNovo_contig_361983	gi|358485511|ref|NC_006088.3_GGA1|	74.41	340	55	4	7	323	1529337	1529007	4e-59	232	1	S
NorthernBobwhite_SimpleDeNovo_contig_137400	gi|358485511|ref|NC_006088.3_GGA1|	80.25	2826	399	43	1	2740	1533467	1530715	0	2531	3	S
NorthernBobwhite_SimpleDeNovo_contig_102582	gi|358485511|ref|NC_006088.3_GGA1|	88.05	887	95	5	8	888	1534458	1533577	0	1110	1	S
NorthernBobwhite_SimpleDeNovo_contig_326796	gi|358485511|ref|NC_006088.3_GGA1|	80.51	195	29	3	78	269	1534489	1534677	3e-42	176	67	M
NorthernBobwhite_SimpleDeNovo_contig_347261	gi|358485511|ref|NC_006088.3_GGA1|	81.03	195	28	3	78	269	1534489	1534677	2e-43	179	55	M
NorthernBobwhite_SimpleDeNovo_contig_40127	gi|358485511|ref|NC_006088.3_GGA1|	86.44	6216	649	54	6	6149	1534848	1540941	0	7340	8516	M
NorthernBobwhite_SimpleDeNovo_contig_114616	gi|358485511|ref|NC_006088.3_GGA1|	84.5	1922	214	22	3	1887	1542664	1544538	0	2100	1	S
NorthernBobwhite_SimpleDeNovo_contig_76778	gi|358485511|ref|NC_006088.3_GGA1|	82.63	1094	117	12	7	1072	1544603	1545651	0	1128	1	S
NorthernBobwhite_SimpleDeNovo_contig_163261	gi|358485511|ref|NC_006088.3_GGA1|	81.2	399	50	7	1	386	1546431	1546817	2e-101	372	1	S
NorthernBobwhite_SimpleDeNovo_contig_31414	gi|358485511|ref|NC_006088.3_GGA1|	85.09	5783	617	53	3160	8755	1553296	1547572	0	6525	3	S
NorthernBobwhite_SimpleDeNovo_contig_276279	gi|358485511|ref|NC_006088.3_GGA1|	83.33	840	113	9	19	844	1556987	1556161	0	868	1	S
NorthernBobwhite_SimpleDeNovo_contig_31415	gi|358485511|ref|NC_006088.3_GGA1|	86.84	2166	240	17	2	2147	1557572	1559712	0	2585	3	S
NorthernBobwhite_SimpleDeNovo_contig_254994	gi|358485511|ref|NC_006088.3_GGA1|	84.33	536	58	6	1	530	1560873	1561388	3e-165	585	1	S
NorthernBobwhite_SimpleDeNovo_contig_254995	gi|358485511|ref|NC_006088.3_GGA1|	85.01	527	61	6	1	520	1560873	1561388	9e-165	583	1	S
NorthernBobwhite_SimpleDeNovo_contig_284286	gi|358485511|ref|NC_006088.3_GGA1|	87.51	1305	124	6	8	1282	1562658	1561363	0	1627	1	S
NorthernBobwhite_SimpleDeNovo_contig_190181	gi|358485511|ref|NC_006088.3_GGA1|	92.55	94	7	0	12	105	1562926	1563019	7e-31	138	2	S
NorthernBobwhite_SimpleDeNovo_contig_168564	gi|358485511|ref|NC_006088.3_GGA1|	81.29	278	39	3	4	273	1563415	1563143	2e-69	266	1	S
NorthernBobwhite_SimpleDeNovo_contig_293936	gi|358485511|ref|NC_006088.3_GGA1|	82.31	277	37	3	5	273	1563415	1563143	1e-72	277	1	S
NorthernBobwhite_SimpleDeNovo_contig_128811	gi|358485511|ref|NC_006088.3_GGA1|	89.03	1595	120	10	62	1626	1563896	1565465	0	2093	1	S
NorthernBobwhite_SimpleDeNovo_contig_168565	gi|358485511|ref|NC_006088.3_GGA1|	85.3	2783	313	25	1	2731	1566287	1569025	0	3149	1	S
NorthernBobwhite_SimpleDeNovo_contig_262599	gi|358485511|ref|NC_006088.3_GGA1|	86.22	254	32	3	1	251	1566312	1566059	2e-76	289	1	S
NorthernBobwhite_SimpleDeNovo_contig_352237	gi|358485511|ref|NC_006088.3_GGA1|	86.61	254	31	3	1	251	1566312	1566059	4e-78	295	1	S
NorthernBobwhite_SimpleDeNovo_contig_223255	gi|358485511|ref|NC_006088.3_GGA1|	83.6	433	52	9	6	424	1569440	1569867	9e-121	437	1	S
NorthernBobwhite_SimpleDeNovo_contig_220222	gi|358485511|ref|NC_006088.3_GGA1|	85.53	3352	358	25	291	3565	1570561	1573862	0	3860	2	S
NorthernBobwhite_SimpleDeNovo_contig_176467	gi|358485511|ref|NC_006088.3_GGA1|	90	520	46	2	1	514	1574443	1573924	0	700	1	S
NorthernBobwhite_SimpleDeNovo_contig_32738	gi|358485511|ref|NC_006088.3_GGA1|	87.59	1386	131	12	1	1371	1578588	1577229	0	1707	2	S
NorthernBobwhite_SimpleDeNovo_contig_157895	gi|358485511|ref|NC_006088.3_GGA1|	82.18	1229	138	21	3	1191	1578650	1579837	0	1207	12	M
NorthernBobwhite_SimpleDeNovo_contig_317061	gi|358485511|ref|NC_006088.3_GGA1|	84.62	156	23	1	1	155	1640378	1640533	1e-40	170	68	M
NorthernBobwhite_SimpleDeNovo_contig_131997	gi|358485511|ref|NC_006088.3_GGA1|	66.67	300	86	4	40	326	1641593	1641891	4e-15	86	3	M
NorthernBobwhite_SimpleDeNovo_contig_222164	gi|358485511|ref|NC_006088.3_GGA1|	68.8	343	81	11	6	329	1641930	1641595	1e-22	111	4	M
NorthernBobwhite_SimpleDeNovo_contig_202314	gi|358485511|ref|NC_006088.3_GGA1|	84.98	213	29	1	1	210	1650128	1650340	3e-61	239	1	S
NorthernBobwhite_SimpleDeNovo_contig_27204	gi|358485511|ref|NC_006088.3_GGA1|	84.21	6516	761	71	1	6379	1650153	1643769	0	7034	2156	M
NorthernBobwhite_SimpleDeNovo_contig_296143	gi|358485511|ref|NC_006088.3_GGA1|	84.04	213	31	1	145	354	1650340	1650128	2e-58	230	1	S
NorthernBobwhite_SimpleDeNovo_contig_31363	gi|358485511|ref|NC_006088.3_GGA1|	81.15	1586	178	22	3	1509	1652050	1650507	0	1523	1	S
NorthernBobwhite_SimpleDeNovo_contig_171932	gi|358485511|ref|NC_006088.3_GGA1|	83.1	1201	111	10	1374	2569	1655145	1654032	0	1288	4	S
NorthernBobwhite_SimpleDeNovo_contig_278548	gi|358485511|ref|NC_006088.3_GGA1|	86.47	207	25	2	251	454	1656578	1656372	1e-61	241	1	S
NorthernBobwhite_SimpleDeNovo_contig_349271	gi|358485511|ref|NC_006088.3_GGA1|	86.47	207	25	2	161	364	1656578	1656372	9e-62	241	1	S
NorthernBobwhite_SimpleDeNovo_contig_171933	gi|358485511|ref|NC_006088.3_GGA1|	88.67	1006	89	5	951	1934	1658296	1659298	0	1301	2	S
NorthernBobwhite_SimpleDeNovo_contig_176443	gi|358485511|ref|NC_006088.3_GGA1|	84.57	3034	336	34	1	3007	1662261	1659333	0	3328	2	M
NorthernBobwhite_SimpleDeNovo_contig_269516	gi|358485511|ref|NC_006088.3_GGA1|	85.57	1213	131	15	239	1424	1665600	1664405	0	1371	4	S
NorthernBobwhite_SimpleDeNovo_contig_197700	gi|358485511|ref|NC_006088.3_GGA1|	84.77	4387	465	45	1892	6151	1670684	1666374	0	4893	12	M
NorthernBobwhite_SimpleDeNovo_contig_265975	gi|358485511|ref|NC_006088.3_GGA1|	85.49	965	102	11	3	946	1674541	1673594	0	1094	2	S
NorthernBobwhite_SimpleDeNovo_contig_98693	gi|358485511|ref|NC_006088.3_GGA1|	82.82	326	53	2	33	357	1675431	1675754	5e-88	329	1	S
NorthernBobwhite_SimpleDeNovo_contig_218516	gi|358485511|ref|NC_006088.3_GGA1|	90.99	832	52	5	38	846	1675432	1674601	0	1160	1	S
NorthernBobwhite_SimpleDeNovo_contig_194630	gi|358485511|ref|NC_006088.3_GGA1|	87.58	451	51	2	3	453	1677094	1676649	2e-156	556	1	S
NorthernBobwhite_SimpleDeNovo_contig_338286	gi|358485511|ref|NC_006088.3_GGA1|	84.62	429	57	3	1	424	1679632	1680056	3e-131	471	2	S
NorthernBobwhite_SimpleDeNovo_contig_330795	gi|358485511|ref|NC_006088.3_GGA1|	84.58	428	60	3	1	427	1679634	1680056	1e-129	466	2	S
NorthernBobwhite_SimpleDeNovo_contig_55567	gi|358485511|ref|NC_006088.3_GGA1|	81.31	856	112	13	1	822	1679642	1678801	0	807	658	M
NorthernBobwhite_SimpleDeNovo_contig_110150	gi|358485511|ref|NC_006088.3_GGA1|	85.5	1828	219	17	1	1810	1682194	1680395	0	2067	2	S
NorthernBobwhite_SimpleDeNovo_contig_32924	gi|358485511|ref|NC_006088.3_GGA1|	86.85	2198	221	11	2248	4389	1686636	1684451	0	2673	4	S
NorthernBobwhite_SimpleDeNovo_contig_346512	gi|358485511|ref|NC_006088.3_GGA1|	75.66	567	75	12	15	519	1689820	1690385	3e-110	403	1	S
NorthernBobwhite_SimpleDeNovo_contig_31295	gi|358485511|ref|NC_006088.3_GGA1|	85.34	1978	208	18	1833	3755	1696064	1694114	0	2253	5041	M
NorthernBobwhite_SimpleDeNovo_contig_126124	gi|358485511|ref|NC_006088.3_GGA1|	87.23	188	23	1	488	674	1698951	1698764	1e-57	228	1	S
NorthernBobwhite_SimpleDeNovo_contig_116392	gi|358485511|ref|NC_006088.3_GGA1|	76.76	185	21	2	1	184	1699399	1699236	1e-34	150	1	S
NorthernBobwhite_SimpleDeNovo_contig_40054	gi|358485511|ref|NC_006088.3_GGA1|	88.78	1212	107	10	2188	3393	1700562	1699374	0	1553	4	S
NorthernBobwhite_SimpleDeNovo_contig_129141	gi|358485511|ref|NC_006088.3_GGA1|	85.19	54	8	0	566	619	1701522	1701575	2e-07	62.6	379	M
NorthernBobwhite_SimpleDeNovo_contig_366606	gi|358485511|ref|NC_006088.3_GGA1|	87.8	41	5	0	418	458	1701570	1701530	0.0001	51.8	27	M
NorthernBobwhite_SimpleDeNovo_contig_373457	gi|358485511|ref|NC_006088.3_GGA1|	93.1	29	2	0	173	201	1701584	1701556	0.012	44.6	104	M
NorthernBobwhite_SimpleDeNovo_contig_162621	gi|358485511|ref|NC_006088.3_GGA1|	86.78	2072	193	27	3	2036	1706775	1704747	0	2453	1	S
NorthernBobwhite_SimpleDeNovo_contig_162620	gi|358485511|ref|NC_006088.3_GGA1|	78.84	1290	186	19	1	1243	1706947	1708196	0	1088	5189	M
NorthernBobwhite_SimpleDeNovo_contig_156656	gi|358485511|ref|NC_006088.3_GGA1|	84.33	3159	353	35	177	3259	1709596	1712688	0	3436	1	S
NorthernBobwhite_SimpleDeNovo_contig_263522	gi|358485511|ref|NC_006088.3_GGA1|	78.22	675	108	11	292	948	1713430	1712777	2e-151	540	2	S
NorthernBobwhite_SimpleDeNovo_contig_162413	gi|358485511|ref|NC_006088.3_GGA1|	88.62	3024	274	24	999	3970	1717458	1714453	0	3858	2	S
NorthernBobwhite_SimpleDeNovo_contig_25726	gi|358485511|ref|NC_006088.3_GGA1|	85.6	1528	173	10	2320	3839	1720613	1719125	0	1761	7064	M
NorthernBobwhite_SimpleDeNovo_contig_63501	gi|358485511|ref|NC_006088.3_GGA1|	86.45	4229	393	31	4	4158	1728117	1723995	0	5066	2	S
NorthernBobwhite_SimpleDeNovo_contig_37587	gi|358485511|ref|NC_006088.3_GGA1|	86.39	2755	305	23	4	2717	1731137	1728412	0	3238	1	S
NorthernBobwhite_SimpleDeNovo_contig_94364	gi|358485511|ref|NC_006088.3_GGA1|	86.41	206	24	3	86	289	1731537	1731740	3e-60	235	1	S
NorthernBobwhite_SimpleDeNovo_contig_24345	gi|358485511|ref|NC_006088.3_GGA1|	84.44	4845	517	51	1	4729	1731835	1736558	0	5323	1	S
NorthernBobwhite_SimpleDeNovo_contig_291190	gi|358485511|ref|NC_006088.3_GGA1|	78.07	383	70	5	1	371	1736535	1736915	3e-80	302	1	S
NorthernBobwhite_SimpleDeNovo_contig_291191	gi|358485511|ref|NC_006088.3_GGA1|	78.07	383	70	5	1	371	1736535	1736915	3e-80	302	1	S
NorthernBobwhite_SimpleDeNovo_contig_104436	gi|358485511|ref|NC_006088.3_GGA1|	83.01	1183	161	15	1	1172	1738434	1737281	0	1196	1	S
NorthernBobwhite_SimpleDeNovo_contig_29348	gi|358485511|ref|NC_006088.3_GGA1|	86.24	2173	216	21	1271	3381	1740305	1742456	0	2551	6	M
NorthernBobwhite_SimpleDeNovo_contig_344940	gi|358485511|ref|NC_006088.3_GGA1|	78.03	173	25	3	237	398	1745328	1745498	3e-31	140	1	S
NorthernBobwhite_SimpleDeNovo_contig_115447	gi|358485511|ref|NC_006088.3_GGA1|	91.63	430	34	1	1	428	1746938	1747367	6e-173	610	1	S
NorthernBobwhite_SimpleDeNovo_contig_138165	gi|358485511|ref|NC_006088.3_GGA1|	86.17	629	67	5	221	848	1749431	1750040	0	738	1747	M
NorthernBobwhite_SimpleDeNovo_contig_316319	gi|358485511|ref|NC_006088.3_GGA1|	74.94	439	51	5	1	382	1750491	1750055	1e-87	327	1	S
NorthernBobwhite_SimpleDeNovo_contig_66979	gi|358485511|ref|NC_006088.3_GGA1|	84.72	1073	114	18	1	1064	1750799	1751830	0	1160	102	M
NorthernBobwhite_SimpleDeNovo_contig_49733	gi|358485511|ref|NC_006088.3_GGA1|	82.27	2442	305	27	849	3235	1755337	1752969	0	2446	2	S
NorthernBobwhite_SimpleDeNovo_contig_205400	gi|358485511|ref|NC_006088.3_GGA1|	84.25	438	54	4	1	432	1757506	1757934	3e-132	475	1	S
NorthernBobwhite_SimpleDeNovo_contig_153421	gi|358485511|ref|NC_006088.3_GGA1|	87.13	746	77	9	1	737	1758771	1758036	0	890	1	S
NorthernBobwhite_SimpleDeNovo_contig_255936	gi|358485511|ref|NC_006088.3_GGA1|	82.81	256	40	3	165	418	1758986	1759239	2e-65	253	75	M
NorthernBobwhite_SimpleDeNovo_contig_75760	gi|358485511|ref|NC_006088.3_GGA1|	82.34	3013	383	40	5	2925	1762246	1759291	0	2989	1	S
NorthernBobwhite_SimpleDeNovo_contig_234867	gi|358485511|ref|NC_006088.3_GGA1|	87.7	919	96	4	1	903	1762497	1763414	0	1146	1	S
NorthernBobwhite_SimpleDeNovo_contig_4869	gi|358485511|ref|NC_006088.3_GGA1|	79.96	1901	255	23	1	1820	1765454	1763599	0	1721	1	S
NorthernBobwhite_SimpleDeNovo_contig_207347	gi|358485511|ref|NC_006088.3_GGA1|	82.95	862	110	10	81	927	1766494	1765655	0	881	1	S
NorthernBobwhite_SimpleDeNovo_contig_4870	gi|358485511|ref|NC_006088.3_GGA1|	83.96	1771	174	18	1	1746	1766706	1768391	0	1932	2	S
NorthernBobwhite_SimpleDeNovo_contig_261131	gi|358485511|ref|NC_006088.3_GGA1|	88.19	711	59	8	1	705	1772240	1772931	0	890	2	S
NorthernBobwhite_SimpleDeNovo_contig_173648	gi|358485511|ref|NC_006088.3_GGA1|	84.49	361	39	4	2	349	1774922	1775278	2e-108	396	1	S
NorthernBobwhite_SimpleDeNovo_contig_173649	gi|358485511|ref|NC_006088.3_GGA1|	86.43	361	36	4	2	353	1774922	1775278	4e-117	425	1	S
NorthernBobwhite_SimpleDeNovo_contig_241094	gi|358485511|ref|NC_006088.3_GGA1|	84.77	1149	150	11	1	1133	1774946	1773807	0	1256	1	S
NorthernBobwhite_SimpleDeNovo_contig_116421	gi|358485511|ref|NC_006088.3_GGA1|	81.55	1827	215	17	856	2604	1776573	1778355	0	1810	2	S
NorthernBobwhite_SimpleDeNovo_contig_153128	gi|358485511|ref|NC_006088.3_GGA1|	86.84	1656	178	12	2	1635	1778395	1780032	0	1986	1	S
NorthernBobwhite_SimpleDeNovo_contig_342177	gi|358485511|ref|NC_006088.3_GGA1|	81.99	483	48	7	1	453	1780007	1780480	2e-134	482	1	S
NorthernBobwhite_SimpleDeNovo_contig_237722	gi|358485511|ref|NC_006088.3_GGA1|	68.15	540	83	11	1	470	1780455	1780975	2e-58	230	352	M
NorthernBobwhite_SimpleDeNovo_contig_318393	gi|358485511|ref|NC_006088.3_GGA1|	82.19	483	47	7	1	453	1780480	1780007	5e-136	488	1	S
NorthernBobwhite_SimpleDeNovo_contig_157785	gi|358485511|ref|NC_006088.3_GGA1|	84.19	759	93	12	320	1061	1781838	1782586	0	798	2	S
NorthernBobwhite_SimpleDeNovo_contig_321344	gi|358485511|ref|NC_006088.3_GGA1|	81.29	326	28	9	1	321	1782561	1782858	4e-80	302	1	S
NorthernBobwhite_SimpleDeNovo_contig_271010	gi|358485511|ref|NC_006088.3_GGA1|	82.39	318	31	7	138	450	1782858	1782561	2e-83	313	1	S
NorthernBobwhite_SimpleDeNovo_contig_109598	gi|358485511|ref|NC_006088.3_GGA1|	80.75	1740	227	29	1	1680	1784033	1785724	0	1595	1	S
NorthernBobwhite_SimpleDeNovo_contig_206939	gi|358485511|ref|NC_006088.3_GGA1|	82.73	2757	333	33	1809	4461	1787305	1790022	0	2807	2	S
NorthernBobwhite_SimpleDeNovo_contig_206940	gi|358485511|ref|NC_006088.3_GGA1|	84.91	212	28	1	104	311	1790209	1789998	9e-61	237	1	S
NorthernBobwhite_SimpleDeNovo_contig_6102	gi|358485511|ref|NC_006088.3_GGA1|	89.84	2304	215	10	1551	3847	1792410	1794701	0	3072	24	M
NorthernBobwhite_SimpleDeNovo_contig_145034	gi|358485511|ref|NC_006088.3_GGA1|	84.88	2685	264	32	1943	4515	1800817	1798163	0	2996	2	S
NorthernBobwhite_SimpleDeNovo_contig_109021	gi|358485511|ref|NC_006088.3_GGA1|	80.56	1327	174	12	1	1253	1806072	1804756	0	1252	2	S
NorthernBobwhite_SimpleDeNovo_contig_14207	gi|358485511|ref|NC_006088.3_GGA1|	79.85	2848	363	33	5953	8633	1814350	1817153	0	2590	9659	M
NorthernBobwhite_SimpleDeNovo_contig_147561	gi|358485511|ref|NC_006088.3_GGA1|	78.1	977	177	11	1	948	1820879	1819911	0	791	2	M
NorthernBobwhite_SimpleDeNovo_contig_37526	gi|358485511|ref|NC_006088.3_GGA1|	83.17	1895	218	21	1456	3295	1826305	1824457	0	1975	8955	M
NorthernBobwhite_SimpleDeNovo_contig_273316	gi|358485511|ref|NC_006088.3_GGA1|	81.63	49	7	1	768	816	1832938	1832984	0.01	46.4	70	M
NorthernBobwhite_SimpleDeNovo_contig_54755	gi|358485511|ref|NC_006088.3_GGA1|	80.99	142	27	0	150	291	1839287	1839146	9e-30	134	64	M
NorthernBobwhite_SimpleDeNovo_contig_91105	gi|358485511|ref|NC_006088.3_GGA1|	71.18	406	98	7	3	392	1840209	1840611	2e-46	190	32	M
NorthernBobwhite_SimpleDeNovo_contig_119025	gi|358485511|ref|NC_006088.3_GGA1|	80.44	1789	294	14	792	2567	1843197	1841452	0	1636	367	M
NorthernBobwhite_SimpleDeNovo_contig_16887	gi|358485511|ref|NC_006088.3_GGA1|	84.85	3788	395	42	637	4296	1847405	1843669	0	4215	2	S
NorthernBobwhite_SimpleDeNovo_contig_134187	gi|358485511|ref|NC_006088.3_GGA1|	82.47	502	79	4	503	998	1849649	1850147	1e-138	499	5512	M
NorthernBobwhite_SimpleDeNovo_contig_124081	gi|358485511|ref|NC_006088.3_GGA1|	82.37	1645	182	18	159	1725	1851437	1853051	0	1676	2	S
NorthernBobwhite_SimpleDeNovo_contig_31230	gi|358485511|ref|NC_006088.3_GGA1|	67.95	933	230	17	3	876	1856679	1855757	4e-85	320	16	M
NorthernBobwhite_SimpleDeNovo_contig_201784	gi|358485511|ref|NC_006088.3_GGA1|	71.82	330	73	2	10	330	1858426	1858108	5e-45	185	54	M
NorthernBobwhite_SimpleDeNovo_contig_148730	gi|358485511|ref|NC_006088.3_GGA1|	85.62	6565	709	54	874	7266	1878365	1871864	0	7551	2	S
NorthernBobwhite_SimpleDeNovo_contig_249387	gi|358485511|ref|NC_006088.3_GGA1|	85.29	1074	115	12	1	1044	1881218	1880158	0	1209	1	S
NorthernBobwhite_SimpleDeNovo_contig_105528	gi|358485511|ref|NC_006088.3_GGA1|	82.77	354	47	2	153	498	1881618	1881271	1e-99	367	1	S
NorthernBobwhite_SimpleDeNovo_contig_106950	gi|358485511|ref|NC_006088.3_GGA1|	77.81	338	33	8	3	334	1882113	1881812	1e-71	273	1	S
NorthernBobwhite_SimpleDeNovo_contig_226929	gi|358485511|ref|NC_006088.3_GGA1|	78.17	339	30	9	3	334	1882113	1881812	1e-72	277	1	S
NorthernBobwhite_SimpleDeNovo_contig_241189	gi|358485511|ref|NC_006088.3_GGA1|	86.03	594	68	4	294	881	1882766	1883350	0	693	1	S
NorthernBobwhite_SimpleDeNovo_contig_22048	gi|358485511|ref|NC_006088.3_GGA1|	83.15	1881	219	19	1	1814	1886721	1884872	0	1966	225	M
NorthernBobwhite_SimpleDeNovo_contig_89681	gi|358485511|ref|NC_006088.3_GGA1|	85.3	7932	871	76	2	7823	1894651	1886905	0	8971	8019	M
NorthernBobwhite_SimpleDeNovo_contig_61248	gi|358485511|ref|NC_006088.3_GGA1|	86.46	2039	197	9	38	2047	1896883	1894895	0	2464	1	S
NorthernBobwhite_SimpleDeNovo_contig_44073	gi|358485511|ref|NC_006088.3_GGA1|	88.64	845	86	5	5	842	1896994	1897835	0	1077	1	S
NorthernBobwhite_SimpleDeNovo_contig_116235	gi|358485511|ref|NC_006088.3_GGA1|	87.2	1836	168	18	10	1799	1898443	1900257	0	2232	3	S
NorthernBobwhite_SimpleDeNovo_contig_230711	gi|358485511|ref|NC_006088.3_GGA1|	88.37	2374	232	14	352	2698	1903018	1905374	0	3014	8	M
NorthernBobwhite_SimpleDeNovo_contig_230427	gi|358485511|ref|NC_006088.3_GGA1|	77.17	898	109	11	635	1459	1907202	1908076	0	733	2	S
NorthernBobwhite_SimpleDeNovo_contig_15858	gi|358485511|ref|NC_006088.3_GGA1|	80.44	4709	631	66	1690	6251	1910250	1914815	0	4304	655	M
NorthernBobwhite_SimpleDeNovo_contig_71701	gi|358485511|ref|NC_006088.3_GGA1|	89.72	895	87	1	61	950	1916186	1917080	0	1200	1	S
NorthernBobwhite_SimpleDeNovo_contig_289864	gi|358485511|ref|NC_006088.3_GGA1|	70.55	343	68	4	3	345	1917057	1917366	3e-42	176	7778	M
NorthernBobwhite_SimpleDeNovo_contig_350612	gi|358485511|ref|NC_006088.3_GGA1|	70.57	350	68	7	1	348	1917373	1917057	2e-39	167	4836	M
NorthernBobwhite_SimpleDeNovo_contig_311604	gi|358485511|ref|NC_006088.3_GGA1|	76.79	405	63	8	3	404	1917729	1917353	4e-79	298	1	S
NorthernBobwhite_SimpleDeNovo_contig_298345	gi|358485511|ref|NC_006088.3_GGA1|	81.03	870	117	11	1	845	1917846	1918692	0	820	1	S
NorthernBobwhite_SimpleDeNovo_contig_253172	gi|358485511|ref|NC_006088.3_GGA1|	81.79	379	46	4	1	368	1918757	1919123	2e-102	376	1	S
NorthernBobwhite_SimpleDeNovo_contig_211491	gi|358485511|ref|NC_006088.3_GGA1|	87.85	1621	142	15	587	2199	1921098	1919525	0	2017	2	S
NorthernBobwhite_SimpleDeNovo_contig_266354	gi|358485511|ref|NC_006088.3_GGA1|	81.1	582	92	5	3	580	1922626	1922059	2e-156	556	1239	M
NorthernBobwhite_SimpleDeNovo_contig_134539	gi|358485511|ref|NC_006088.3_GGA1|	80.8	1911	261	33	2	1855	1922682	1924543	0	1739	1	S
NorthernBobwhite_SimpleDeNovo_contig_233837	gi|358485511|ref|NC_006088.3_GGA1|	80.5	923	115	18	2	883	1924694	1925592	0	830	1	S
NorthernBobwhite_SimpleDeNovo_contig_89236	gi|358485511|ref|NC_006088.3_GGA1|	79.44	608	68	19	2	572	1926194	1925607	4e-139	499	1	S
NorthernBobwhite_SimpleDeNovo_contig_221509	gi|358485511|ref|NC_006088.3_GGA1|	80.26	228	33	6	32	249	1926416	1926191	3e-47	192	354	M
NorthernBobwhite_SimpleDeNovo_contig_33921	gi|358485511|ref|NC_006088.3_GGA1|	81.48	2322	246	37	2762	4970	1929308	1931558	0	2248	1525	M
NorthernBobwhite_SimpleDeNovo_contig_96082	gi|358485511|ref|NC_006088.3_GGA1|	84.18	2326	224	29	12	2229	1931612	1933901	0	2535	1	S
NorthernBobwhite_SimpleDeNovo_contig_205368	gi|358485511|ref|NC_006088.3_GGA1|	81.15	1995	242	37	1	1929	1937817	1935891	0	1856	3	S
NorthernBobwhite_SimpleDeNovo_contig_214605	gi|358485511|ref|NC_006088.3_GGA1|	78.02	1174	144	23	3	1144	1937929	1939020	0	953	2	S
NorthernBobwhite_SimpleDeNovo_contig_316187	gi|358485511|ref|NC_006088.3_GGA1|	82.82	291	35	3	78	366	1939994	1939717	1e-79	300	1	S
NorthernBobwhite_SimpleDeNovo_contig_359567	gi|358485511|ref|NC_006088.3_GGA1|	82.99	288	37	4	78	363	1939994	1939717	6e-77	291	1	S
NorthernBobwhite_SimpleDeNovo_contig_217383	gi|358485511|ref|NC_006088.3_GGA1|	84.45	1338	148	12	2	1332	1940207	1941491	0	1476	1	S
NorthernBobwhite_SimpleDeNovo_contig_279773	gi|358485511|ref|NC_006088.3_GGA1|	85.68	440	56	3	10	444	1941978	1942415	2e-140	502	1	S
NorthernBobwhite_SimpleDeNovo_contig_316732	gi|358485511|ref|NC_006088.3_GGA1|	86.39	441	52	4	10	445	1941978	1942415	3e-144	515	1	S
NorthernBobwhite_SimpleDeNovo_contig_140040	gi|358485511|ref|NC_006088.3_GGA1|	86.26	313	40	3	491	801	1942701	1942390	3e-97	360	1	S
NorthernBobwhite_SimpleDeNovo_contig_140039	gi|358485511|ref|NC_006088.3_GGA1|	84.69	2384	274	26	2101	4424	1976526	1978878	0	2619	667	M
NorthernBobwhite_SimpleDeNovo_contig_341925	gi|358485511|ref|NC_006088.3_GGA1|	77.21	294	45	4	159	446	1979130	1978853	2e-58	230	2	S
NorthernBobwhite_SimpleDeNovo_contig_97229	gi|358485511|ref|NC_006088.3_GGA1|	77.89	294	40	3	249	533	1979130	1978853	3e-63	246	2	S
NorthernBobwhite_SimpleDeNovo_contig_165475	gi|358485511|ref|NC_006088.3_GGA1|	84.91	2260	258	27	1547	3743	1982758	1980519	0	2491	357	M
NorthernBobwhite_SimpleDeNovo_contig_338992	gi|358485511|ref|NC_006088.3_GGA1|	84.59	370	47	5	1	365	1985394	1985758	5e-109	398	1	S
NorthernBobwhite_SimpleDeNovo_contig_212990	gi|358485511|ref|NC_006088.3_GGA1|	88.57	1408	134	13	3220	4619	1987258	1985870	0	1779	4	S
NorthernBobwhite_SimpleDeNovo_contig_119019	gi|358485511|ref|NC_006088.3_GGA1|	85.67	6568	696	69	1776	8222	1997591	1991148	0	7512	2206	M
NorthernBobwhite_SimpleDeNovo_contig_81211	gi|358485511|ref|NC_006088.3_GGA1|	81.82	759	114	7	1	743	2001580	2000830	0	737	2238	M
NorthernBobwhite_SimpleDeNovo_contig_246815	gi|358485511|ref|NC_006088.3_GGA1|	79.33	745	112	12	297	1014	2001608	2002337	1e-179	634	1319	M
NorthernBobwhite_SimpleDeNovo_contig_252950	gi|358485511|ref|NC_006088.3_GGA1|	86.72	2040	212	21	236	2248	2004411	2002404	0	2415	1	S
NorthernBobwhite_SimpleDeNovo_contig_65761	gi|358485511|ref|NC_006088.3_GGA1|	88.45	3609	315	24	135	3699	2004575	2008125	0	4612	126	M
NorthernBobwhite_SimpleDeNovo_contig_276714	gi|358485511|ref|NC_006088.3_GGA1|	79.92	533	55	10	20	503	2008120	2008649	8e-134	480	1	S
NorthernBobwhite_SimpleDeNovo_contig_331595	gi|358485511|ref|NC_006088.3_GGA1|	91.18	34	3	0	1	34	2008469	2008436	0.001	48.2	154	M
NorthernBobwhite_SimpleDeNovo_contig_33775	gi|358485511|ref|NC_006088.3_GGA1|	86.2	2711	254	26	3	2668	2011585	2008950	0	3195	1	S
NorthernBobwhite_SimpleDeNovo_contig_246332	gi|358485511|ref|NC_006088.3_GGA1|	84.38	384	47	3	96	470	2012227	2011848	7e-116	421	1	S
NorthernBobwhite_SimpleDeNovo_contig_94483	gi|358485511|ref|NC_006088.3_GGA1|	88.16	473	46	3	580	1042	2013428	2013900	3e-168	596	333	M
NorthernBobwhite_SimpleDeNovo_contig_286520	gi|358485511|ref|NC_006088.3_GGA1|	89.86	355	27	3	1	349	2014682	2014331	8e-132	473	1	S
NorthernBobwhite_SimpleDeNovo_contig_129760	gi|358485511|ref|NC_006088.3_GGA1|	75.61	451	82	9	20	451	2016310	2015869	3e-82	309	7174	M
NorthernBobwhite_SimpleDeNovo_contig_1776	gi|358485511|ref|NC_006088.3_GGA1|	83.75	1415	146	8	3136	4503	2019120	2020497	0	1555	4	S
NorthernBobwhite_SimpleDeNovo_contig_247960	gi|358485511|ref|NC_006088.3_GGA1|	89.92	516	41	2	1	505	2020567	2021082	0	697	2	S
NorthernBobwhite_SimpleDeNovo_contig_228334	gi|358485511|ref|NC_006088.3_GGA1|	86.2	1942	183	20	2032	3919	2024594	2022684	0	2280	4	S
NorthernBobwhite_SimpleDeNovo_contig_294869	gi|358485511|ref|NC_006088.3_GGA1|	77.89	398	53	7	1	366	2027218	2027612	4e-86	322	1	S
NorthernBobwhite_SimpleDeNovo_contig_265412	gi|358485511|ref|NC_006088.3_GGA1|	85	40	6	0	9	48	2028806	2028767	0.008	46.4	230	M
NorthernBobwhite_SimpleDeNovo_contig_272377	gi|358485511|ref|NC_006088.3_GGA1|	82.46	1676	215	25	1	1634	2029625	2027987	0	1656	1	S
NorthernBobwhite_SimpleDeNovo_contig_242152	gi|358485511|ref|NC_006088.3_GGA1|	85.03	1570	166	13	1	1523	2031564	2030017	0	1775	1	S
NorthernBobwhite_SimpleDeNovo_contig_102924	gi|358485511|ref|NC_006088.3_GGA1|	85.91	440	44	4	3	437	2032354	2031928	1e-143	513	1	S
NorthernBobwhite_SimpleDeNovo_contig_158239	gi|358485511|ref|NC_006088.3_GGA1|	87	1146	120	13	1	1134	2033460	2032332	0	1362	1	S
NorthernBobwhite_SimpleDeNovo_contig_102925	gi|358485511|ref|NC_006088.3_GGA1|	90.27	3976	307	20	3425	7361	2037854	2041788	0	5407	7	S
NorthernBobwhite_SimpleDeNovo_contig_267325	gi|358485511|ref|NC_006088.3_GGA1|	76.89	1220	146	16	419	1546	2050360	2051535	0	980	2	S
NorthernBobwhite_SimpleDeNovo_contig_80673	gi|358485511|ref|NC_006088.3_GGA1|	89.51	572	44	4	1	557	2051744	2052314	0	758	14	M
NorthernBobwhite_SimpleDeNovo_contig_253953	gi|358485511|ref|NC_006088.3_GGA1|	86.99	899	112	3	3	900	2054428	2053534	0	1085	1	S
NorthernBobwhite_SimpleDeNovo_contig_35772	gi|358485511|ref|NC_006088.3_GGA1|	86.76	2975	306	20	2595	5499	2058016	2060972	0	3579	4	S
NorthernBobwhite_SimpleDeNovo_contig_166927	gi|358485511|ref|NC_006088.3_GGA1|	84.74	439	62	3	633	1067	2061586	2061149	2e-133	480	2	S
NorthernBobwhite_SimpleDeNovo_contig_104153	gi|358485511|ref|NC_006088.3_GGA1|	87.66	2317	232	13	3633	5939	2067062	2069334	0	2879	3	S
NorthernBobwhite_SimpleDeNovo_contig_36419	gi|358485511|ref|NC_006088.3_GGA1|	85.6	1104	129	10	2629	3706	2072316	2073415	0	1256	7	M
NorthernBobwhite_SimpleDeNovo_contig_100999	gi|358485511|ref|NC_006088.3_GGA1|	88.88	1097	102	6	8	1097	2074607	2075690	0	1420	1	S
NorthernBobwhite_SimpleDeNovo_contig_116718	gi|358485511|ref|NC_006088.3_GGA1|	83.25	955	133	5	3	936	2076650	2075702	0	1003	2	M
NorthernBobwhite_SimpleDeNovo_contig_116717	gi|358485511|ref|NC_006088.3_GGA1|	90.13	5979	463	31	14631	20542	2092168	2098086	0	8098	3107	M
NorthernBobwhite_SimpleDeNovo_contig_77439	gi|358485511|ref|NC_006088.3_GGA1|	86.82	4591	388	38	1	4469	2098519	2103014	0	5577	56	M
NorthernBobwhite_SimpleDeNovo_contig_249451	gi|358485511|ref|NC_006088.3_GGA1|	81.46	329	49	4	1	318	2098544	2098217	5e-83	311	1	S
NorthernBobwhite_SimpleDeNovo_contig_76929	gi|358485511|ref|NC_006088.3_GGA1|	87.96	1005	56	9	145	1085	2105265	2104262	0	1285	1	S
NorthernBobwhite_SimpleDeNovo_contig_76930	gi|358485511|ref|NC_006088.3_GGA1|	87.53	946	91	5	488	1407	2105623	2106567	0	1177	2	S
NorthernBobwhite_SimpleDeNovo_contig_67709	gi|358485511|ref|NC_006088.3_GGA1|	85.17	5187	595	45	1	5084	2107279	2112394	0	5842	3677	M
NorthernBobwhite_SimpleDeNovo_contig_342167	gi|358485511|ref|NC_006088.3_GGA1|	96.3	27	1	0	3	29	2121377	2121403	0.013	44.6	26	M
NorthernBobwhite_SimpleDeNovo_contig_330917	gi|358485511|ref|NC_006088.3_GGA1|	91.12	383	34	0	1	383	2122520	2122138	3e-151	538	1	S
NorthernBobwhite_SimpleDeNovo_contig_19594	gi|358485511|ref|NC_006088.3_GGA1|	88.55	3023	302	16	1	2994	2125790	2122783	0	3860	1	S
NorthernBobwhite_SimpleDeNovo_contig_159573	gi|358485511|ref|NC_006088.3_GGA1|	89.77	929	72	5	451	1378	2126919	2126013	0	1245	2	S
NorthernBobwhite_SimpleDeNovo_contig_327299	gi|358485511|ref|NC_006088.3_GGA1|	84.62	78	12	0	256	333	2127465	2127542	2e-15	87.8	10	M
NorthernBobwhite_SimpleDeNovo_contig_68600	gi|358485511|ref|NC_006088.3_GGA1|	88.65	1542	157	5	1	1527	2129753	2128215	0	1986	1	S
NorthernBobwhite_SimpleDeNovo_contig_5640	gi|358485511|ref|NC_006088.3_GGA1|	87.48	4330	351	41	425	4619	2130508	2134781	0	5353	483	M
NorthernBobwhite_SimpleDeNovo_contig_27399	gi|358485511|ref|NC_006088.3_GGA1|	86.35	1451	166	11	117	1538	2135214	2136661	0	1703	369	M
NorthernBobwhite_SimpleDeNovo_contig_117945	gi|358485511|ref|NC_006088.3_GGA1|	83.03	3035	349	38	1	2952	2139727	2136776	0	3130	1	S
NorthernBobwhite_SimpleDeNovo_contig_117944	gi|358485511|ref|NC_006088.3_GGA1|	90.76	1039	85	4	15	1052	2139741	2140769	0	1433	1	S
NorthernBobwhite_SimpleDeNovo_contig_280925	gi|358485511|ref|NC_006088.3_GGA1|	85.22	460	55	4	5	457	2141230	2140777	1e-144	517	1	S
NorthernBobwhite_SimpleDeNovo_contig_255314	gi|358485511|ref|NC_006088.3_GGA1|	90.02	1393	111	5	806	2195	2142651	2141284	0	1889	603	M
NorthernBobwhite_SimpleDeNovo_contig_255345	gi|358485511|ref|NC_006088.3_GGA1|	89.63	405	26	2	4	395	2146202	2145801	5e-154	547	1	S
NorthernBobwhite_SimpleDeNovo_contig_145265	gi|358485511|ref|NC_006088.3_GGA1|	93.02	1075	62	4	3	1076	2147294	2148356	0	1595	1	S
NorthernBobwhite_SimpleDeNovo_contig_145264	gi|358485511|ref|NC_006088.3_GGA1|	84.62	338	34	2	1	320	2148667	2148330	1e-104	383	1	S
NorthernBobwhite_SimpleDeNovo_contig_235937	gi|358485511|ref|NC_006088.3_GGA1|	85.21	338	32	2	1	320	2148667	2148330	2e-107	392	1	S
NorthernBobwhite_SimpleDeNovo_contig_86602	gi|358485511|ref|NC_006088.3_GGA1|	84.83	6172	644	55	491	6460	2154723	2148642	0	6926	2	S
NorthernBobwhite_SimpleDeNovo_contig_250878	gi|358485511|ref|NC_006088.3_GGA1|	82.01	328	55	2	1	328	2155639	2155316	1e-85	320	1	S
NorthernBobwhite_SimpleDeNovo_contig_250879	gi|358485511|ref|NC_006088.3_GGA1|	80.06	336	43	3	1	324	2155639	2155316	2e-83	313	1	S
NorthernBobwhite_SimpleDeNovo_contig_58540	gi|358485511|ref|NC_006088.3_GGA1|	81.84	2792	312	26	2642	5260	2158383	2155614	0	2809	3	S
NorthernBobwhite_SimpleDeNovo_contig_1625	gi|358485511|ref|NC_006088.3_GGA1|	91.62	1706	118	4	1	1688	2161082	2162780	0	2437	2	S
NorthernBobwhite_SimpleDeNovo_contig_17078	gi|358485511|ref|NC_006088.3_GGA1|	87.79	5789	530	41	8157	13885	2170451	2164780	0	7227	14	M
NorthernBobwhite_SimpleDeNovo_contig_241399	gi|358485511|ref|NC_006088.3_GGA1|	89.59	2113	159	11	1	2075	2179260	2181349	0	2825	1	S
NorthernBobwhite_SimpleDeNovo_contig_365209	gi|358485511|ref|NC_006088.3_GGA1|	80.57	350	58	2	1	348	2184280	2183939	3e-87	325	68	M
NorthernBobwhite_SimpleDeNovo_contig_365208	gi|358485511|ref|NC_006088.3_GGA1|	79.71	350	60	3	1	347	2184280	2183939	7e-82	307	57	M
NorthernBobwhite_SimpleDeNovo_contig_111781	gi|358485511|ref|NC_006088.3_GGA1|	82.46	3974	516	38	3207	7056	2186269	2182353	0	4017	296	M
NorthernBobwhite_SimpleDeNovo_contig_111782	gi|358485511|ref|NC_006088.3_GGA1|	82.29	830	106	12	1	805	2189577	2190390	0	818	404	M
NorthernBobwhite_SimpleDeNovo_contig_144685	gi|358485511|ref|NC_006088.3_GGA1|	89.57	1428	114	11	311	1726	2191324	2192728	0	1885	1	S
NorthernBobwhite_SimpleDeNovo_contig_174402	gi|358485511|ref|NC_006088.3_GGA1|	83.52	1754	201	23	1	1707	2193031	2194743	0	1837	1	S
NorthernBobwhite_SimpleDeNovo_contig_273102	gi|358485511|ref|NC_006088.3_GGA1|	83.94	741	96	6	2	740	2194771	2195490	0	794	1	S
NorthernBobwhite_SimpleDeNovo_contig_161137	gi|358485511|ref|NC_006088.3_GGA1|	80.62	1125	147	17	127	1194	2196995	2195885	0	1034	1	S
NorthernBobwhite_SimpleDeNovo_contig_191947	gi|358485511|ref|NC_006088.3_GGA1|	90.2	347	18	5	1	333	2199116	2199460	4e-129	464	1	S
NorthernBobwhite_SimpleDeNovo_contig_295544	gi|358485511|ref|NC_006088.3_GGA1|	77.55	49	11	0	366	414	2200601	2200553	1.4	39.2	5	M
NorthernBobwhite_SimpleDeNovo_contig_309314	gi|358485511|ref|NC_006088.3_GGA1|	88.87	683	32	8	7	672	2200616	2199961	0	893	1	S
NorthernBobwhite_SimpleDeNovo_contig_186609	gi|358485511|ref|NC_006088.3_GGA1|	87.17	3553	272	36	586	4072	2204047	2200613	0	4356	2	S
NorthernBobwhite_SimpleDeNovo_contig_166307	gi|358485511|ref|NC_006088.3_GGA1|	86.68	3507	361	28	1	3463	2209349	2205905	0	4188	2	S
NorthernBobwhite_SimpleDeNovo_contig_123117	gi|358485511|ref|NC_006088.3_GGA1|	88.77	1942	178	11	1	1916	2211444	2209517	0	2506	1	S
NorthernBobwhite_SimpleDeNovo_contig_238596	gi|358485511|ref|NC_006088.3_GGA1|	92.38	341	21	2	3	343	2211504	2211839	8e-138	493	1	S
NorthernBobwhite_SimpleDeNovo_contig_150178	gi|358485511|ref|NC_006088.3_GGA1|	84.48	902	97	8	1	864	2212109	2213005	0	998	1	S
NorthernBobwhite_SimpleDeNovo_contig_145192	gi|358485511|ref|NC_006088.3_GGA1|	82.6	339	40	4	1	338	2212134	2211814	3e-93	345	1	S
NorthernBobwhite_SimpleDeNovo_contig_145191	gi|358485511|ref|NC_006088.3_GGA1|	84.89	331	39	3	1	330	2212134	2211814	2e-100	369	1	S
NorthernBobwhite_SimpleDeNovo_contig_145193	gi|358485511|ref|NC_006088.3_GGA1|	87.14	1718	169	15	83	1773	2213236	2214928	0	2082	2	S
NorthernBobwhite_SimpleDeNovo_contig_303508	gi|358485511|ref|NC_006088.3_GGA1|	93.1	29	2	0	703	731	2213309	2213281	0.055	44.6	134	M
NorthernBobwhite_SimpleDeNovo_contig_422	gi|358485511|ref|NC_006088.3_GGA1|	88.55	1746	154	14	6	1730	2217821	2216101	0	2226	1	S
NorthernBobwhite_SimpleDeNovo_contig_423	gi|358485511|ref|NC_006088.3_GGA1|	85.02	2564	299	24	1	2496	2217917	2220463	0	2861	65	M
NorthernBobwhite_SimpleDeNovo_contig_45843	gi|358485511|ref|NC_006088.3_GGA1|	83.45	1909	159	22	212	2056	2222403	2220588	0	2060	1	S
NorthernBobwhite_SimpleDeNovo_contig_45842	gi|358485511|ref|NC_006088.3_GGA1|	88.05	2076	221	10	123	2187	2222429	2224488	0	2605	3	S
NorthernBobwhite_SimpleDeNovo_contig_338202	gi|358485511|ref|NC_006088.3_GGA1|	93.94	33	1	1	206	237	2230074	2230042	0.001	48.2	149	M
NorthernBobwhite_SimpleDeNovo_contig_29804	gi|358485511|ref|NC_006088.3_GGA1|	88	10247	862	60	11	10063	2236053	2225981	0	13000	656	M
NorthernBobwhite_SimpleDeNovo_contig_50987	gi|358485511|ref|NC_006088.3_GGA1|	86.67	2595	265	20	5537	8088	2242036	2244592	0	3103	5343	M
NorthernBobwhite_SimpleDeNovo_contig_237120	gi|358485511|ref|NC_006088.3_GGA1|	84.24	552	68	3	496	1031	2245747	2245199	4e-171	607	2	S
NorthernBobwhite_SimpleDeNovo_contig_22520	gi|358485511|ref|NC_006088.3_GGA1|	86.48	5679	579	48	1	5581	2252244	2246657	0	6733	1	S
NorthernBobwhite_SimpleDeNovo_contig_200536	gi|358485511|ref|NC_006088.3_GGA1|	86.19	3041	333	22	1	3012	2252413	2255395	0	3570	1	S
NorthernBobwhite_SimpleDeNovo_contig_108828	gi|358485511|ref|NC_006088.3_GGA1|	89	3764	330	25	36	3725	2259245	2255492	0	4884	1	S
NorthernBobwhite_SimpleDeNovo_contig_98935	gi|358485511|ref|NC_006088.3_GGA1|	80.12	1358	183	14	622	1950	2260680	2261979	0	1247	2	S
NorthernBobwhite_SimpleDeNovo_contig_107305	gi|358485511|ref|NC_006088.3_GGA1|	88.23	2056	193	20	1	2037	2262599	2264624	0	2571	1	S
NorthernBobwhite_SimpleDeNovo_contig_151951	gi|358485511|ref|NC_006088.3_GGA1|	83.5	297	45	3	1	293	2262624	2262328	2e-81	306	1	S
NorthernBobwhite_SimpleDeNovo_contig_285388	gi|358485511|ref|NC_006088.3_GGA1|	83.5	297	45	3	1	293	2262624	2262328	2e-81	306	2	M
NorthernBobwhite_SimpleDeNovo_contig_69342	gi|358485511|ref|NC_006088.3_GGA1|	83.28	634	85	5	1	620	2265476	2264850	0	663	1	S
NorthernBobwhite_SimpleDeNovo_contig_248642	gi|358485511|ref|NC_006088.3_GGA1|	88.46	468	41	4	100	562	2266086	2265627	6e-168	594	1	S
NorthernBobwhite_SimpleDeNovo_contig_69066	gi|358485511|ref|NC_006088.3_GGA1|	82.56	7219	870	83	1	6943	2274396	2267291	0	7319	483	M
NorthernBobwhite_SimpleDeNovo_contig_69067	gi|358485511|ref|NC_006088.3_GGA1|	90.87	1347	115	5	1	1341	2274491	2275835	0	1860	2	S
NorthernBobwhite_SimpleDeNovo_contig_235844	gi|358485511|ref|NC_006088.3_GGA1|	89.55	670	69	1	460	1129	2277905	2277237	0	890	1	S
NorthernBobwhite_SimpleDeNovo_contig_184894	gi|358485511|ref|NC_006088.3_GGA1|	78.29	152	26	3	173	318	2280271	2280421	7e-25	118	3777	M
NorthernBobwhite_SimpleDeNovo_contig_37517	gi|358485511|ref|NC_006088.3_GGA1|	85.25	2292	272	18	2	2268	2280419	2278169	0	2589	4161	M
NorthernBobwhite_SimpleDeNovo_contig_37518	gi|358485511|ref|NC_006088.3_GGA1|	85.61	3905	402	31	772	4551	2280548	2284417	0	4513	5966	M
NorthernBobwhite_SimpleDeNovo_contig_277863	gi|358485511|ref|NC_006088.3_GGA1|	85.8	1732	164	19	1	1666	2289521	2287806	0	2003	3	S
NorthernBobwhite_SimpleDeNovo_contig_210151	gi|358485511|ref|NC_006088.3_GGA1|	82.73	388	60	3	1	388	2291437	2291817	8e-107	390	49	M
NorthernBobwhite_SimpleDeNovo_contig_210150	gi|358485511|ref|NC_006088.3_GGA1|	83.51	388	57	3	1	388	2291437	2291817	4e-111	405	35	M
NorthernBobwhite_SimpleDeNovo_contig_6306	gi|358485511|ref|NC_006088.3_GGA1|	84.6	1597	155	12	1	1573	2291462	2289933	0	1799	2	S
NorthernBobwhite_SimpleDeNovo_contig_6307	gi|358485511|ref|NC_006088.3_GGA1|	88.38	2926	285	19	36	2933	2294691	2291793	0	3709	1	S
NorthernBobwhite_SimpleDeNovo_contig_5578	gi|358485511|ref|NC_006088.3_GGA1|	87	7295	745	54	1	7179	2302303	2295096	0	8821	113	M
NorthernBobwhite_SimpleDeNovo_contig_213849	gi|358485511|ref|NC_006088.3_GGA1|	90.88	329	23	3	1	323	2303034	2302707	2e-125	452	1	S
NorthernBobwhite_SimpleDeNovo_contig_27850	gi|358485511|ref|NC_006088.3_GGA1|	86.04	4677	484	30	7895	12448	2309973	2305343	0	5508	717	M
NorthernBobwhite_SimpleDeNovo_contig_122618	gi|358485511|ref|NC_006088.3_GGA1|	82.05	780	86	6	1	729	2319800	2319024	0	798	177	M
NorthernBobwhite_SimpleDeNovo_contig_137205	gi|358485511|ref|NC_006088.3_GGA1|	86.48	2714	253	22	1	2626	2323111	2320424	0	3243	1	S
NorthernBobwhite_SimpleDeNovo_contig_339231	gi|358485511|ref|NC_006088.3_GGA1|	88.27	307	32	2	1	304	2323346	2323651	8e-106	387	1	S
NorthernBobwhite_SimpleDeNovo_contig_51999	gi|358485511|ref|NC_006088.3_GGA1|	85.52	2009	226	22	1	1969	2325920	2323937	0	2280	137	M
NorthernBobwhite_SimpleDeNovo_contig_58813	gi|358485511|ref|NC_006088.3_GGA1|	91.68	974	66	4	419	1390	2326548	2327508	0	1388	3	S
NorthernBobwhite_SimpleDeNovo_contig_159950	gi|358485511|ref|NC_006088.3_GGA1|	82.65	1988	189	21	11	1902	2329574	2327647	0	2076	1	S
NorthernBobwhite_SimpleDeNovo_contig_161291	gi|358485511|ref|NC_006088.3_GGA1|	96	25	1	0	636	660	2330232	2330256	0.31	41	3	M
NorthernBobwhite_SimpleDeNovo_contig_121617	gi|358485511|ref|NC_006088.3_GGA1|	92.59	27	2	0	1423	1449	2330259	2330233	0.69	41	10	M
NorthernBobwhite_SimpleDeNovo_contig_125019	gi|358485511|ref|NC_006088.3_GGA1|	88.64	5494	449	37	2	5397	2334997	2329581	0	7086	2	S
NorthernBobwhite_SimpleDeNovo_contig_125018	gi|358485511|ref|NC_006088.3_GGA1|	89.57	719	71	3	4	721	2335063	2335778	0	949	3	S
NorthernBobwhite_SimpleDeNovo_contig_188717	gi|358485511|ref|NC_006088.3_GGA1|	82.21	562	60	4	4	537	2337448	2337997	3e-164	581	1	S
NorthernBobwhite_SimpleDeNovo_contig_130763	gi|358485511|ref|NC_006088.3_GGA1|	88.92	2039	178	11	1066	3090	2340182	2338178	0	2652	2	S
NorthernBobwhite_SimpleDeNovo_contig_91364	gi|358485511|ref|NC_006088.3_GGA1|	87.71	3142	265	22	1	3058	2352672	2349568	0	3936	3	S
NorthernBobwhite_SimpleDeNovo_contig_184008	gi|358485511|ref|NC_006088.3_GGA1|	87.96	673	64	3	1	656	2352684	2353356	0	850	1	S
NorthernBobwhite_SimpleDeNovo_contig_165209	gi|358485511|ref|NC_006088.3_GGA1|	88.18	2285	229	15	2	2258	2356071	2353800	0	2874	1	S
NorthernBobwhite_SimpleDeNovo_contig_234339	gi|358485511|ref|NC_006088.3_GGA1|	90.85	481	42	2	7	486	2360422	2360901	0	663	1	S
NorthernBobwhite_SimpleDeNovo_contig_125985	gi|358485511|ref|NC_006088.3_GGA1|	85.79	2287	225	18	3	2210	2360434	2358169	0	2668	2	S
NorthernBobwhite_SimpleDeNovo_contig_134314	gi|358485511|ref|NC_006088.3_GGA1|	91.1	977	59	5	12	968	2361153	2362121	0	1373	1	S
NorthernBobwhite_SimpleDeNovo_contig_134315	gi|358485511|ref|NC_006088.3_GGA1|	91.62	394	32	1	3	395	2362535	2362142	3e-157	558	1	S
NorthernBobwhite_SimpleDeNovo_contig_312384	gi|358485511|ref|NC_006088.3_GGA1|	90.1	869	64	4	3	859	2363546	2362688	0	1182	1	S
NorthernBobwhite_SimpleDeNovo_contig_243902	gi|358485511|ref|NC_006088.3_GGA1|	95.79	380	16	0	1	380	2363760	2364139	4e-174	614	1	S
NorthernBobwhite_SimpleDeNovo_contig_81639	gi|358485511|ref|NC_006088.3_GGA1|	88.56	3216	307	19	4229	7407	2370302	2373493	0	4111	1056	M
NorthernBobwhite_SimpleDeNovo_contig_255586	gi|358485511|ref|NC_006088.3_GGA1|	81.36	118	21	1	1	118	2370979	2371095	2e-22	111	115	M
NorthernBobwhite_SimpleDeNovo_contig_9498	gi|358485511|ref|NC_006088.3_GGA1|	88.12	4006	359	17	1	3921	2373462	2377435	0	5108	4873	M
NorthernBobwhite_SimpleDeNovo_contig_236687	gi|358485511|ref|NC_006088.3_GGA1|	94.6	1000	53	1	2	1000	2378672	2377673	0	1557	1	S
NorthernBobwhite_SimpleDeNovo_contig_196893	gi|358485511|ref|NC_006088.3_GGA1|	89.47	171	18	0	6	176	2378749	2378919	7e-58	228	1	S
NorthernBobwhite_SimpleDeNovo_contig_220473	gi|358485511|ref|NC_006088.3_GGA1|	88.59	1437	141	9	1	1419	2379393	2380824	0	1833	2	S
NorthernBobwhite_SimpleDeNovo_contig_183688	gi|358485511|ref|NC_006088.3_GGA1|	85.02	1469	148	17	3	1423	2381850	2383294	0	1645	1	S
NorthernBobwhite_SimpleDeNovo_contig_198598	gi|358485511|ref|NC_006088.3_GGA1|	85.24	1978	209	17	5	1929	2383365	2385312	0	2250	1	S
NorthernBobwhite_SimpleDeNovo_contig_56373	gi|358485511|ref|NC_006088.3_GGA1|	87.49	2047	210	17	3191	5207	2389344	2391374	0	2502	3	S
NorthernBobwhite_SimpleDeNovo_contig_277313	gi|358485511|ref|NC_006088.3_GGA1|	78.88	251	34	3	1	245	2391754	2391991	1e-54	217	1	S
NorthernBobwhite_SimpleDeNovo_contig_277312	gi|358485511|ref|NC_006088.3_GGA1|	79.28	251	33	3	1	245	2391754	2391991	2e-56	223	1	S
NorthernBobwhite_SimpleDeNovo_contig_30851	gi|358485511|ref|NC_006088.3_GGA1|	88.5	3808	321	27	24	3776	2395768	2392023	0	4877	1	S
NorthernBobwhite_SimpleDeNovo_contig_170671	gi|358485511|ref|NC_006088.3_GGA1|	88.18	1641	169	10	11	1642	2395911	2397535	0	2062	1	S
NorthernBobwhite_SimpleDeNovo_contig_192312	gi|358485511|ref|NC_006088.3_GGA1|	83.82	2076	285	15	1019	3075	2399986	2397943	0	2208	241	M
NorthernBobwhite_SimpleDeNovo_contig_221070	gi|358485511|ref|NC_006088.3_GGA1|	89.02	1075	87	11	1	1069	2401310	2402359	0	1386	1	S
NorthernBobwhite_SimpleDeNovo_contig_277915	gi|358485511|ref|NC_006088.3_GGA1|	83.53	510	82	2	2	511	2402501	2403008	4e-150	535	4703	M
NorthernBobwhite_SimpleDeNovo_contig_135376	gi|358485511|ref|NC_006088.3_GGA1|	90.94	530	40	4	540	1066	2403987	2403463	0	729	3	S
NorthernBobwhite_SimpleDeNovo_contig_222125	gi|358485511|ref|NC_006088.3_GGA1|	81.17	563	79	6	1	546	2405008	2404456	5e-150	535	1	S
NorthernBobwhite_SimpleDeNovo_contig_135375	gi|358485511|ref|NC_006088.3_GGA1|	87.74	1305	126	12	367	1647	2405125	2406419	0	1609	1	S
NorthernBobwhite_SimpleDeNovo_contig_195337	gi|358485511|ref|NC_006088.3_GGA1|	83.26	1422	182	14	1	1390	2408931	2407534	0	1480	2	S
NorthernBobwhite_SimpleDeNovo_contig_240128	gi|358485511|ref|NC_006088.3_GGA1|	83.15	1157	113	16	1	1113	2410215	2409097	0	1209	1	S
NorthernBobwhite_SimpleDeNovo_contig_169769	gi|358485511|ref|NC_006088.3_GGA1|	82.02	356	45	4	33	376	2410491	2410839	2e-95	352	1	S
NorthernBobwhite_SimpleDeNovo_contig_46037	gi|358485511|ref|NC_006088.3_GGA1|	85.98	2703	315	18	109	2798	2412564	2415215	0	3142	1	S
NorthernBobwhite_SimpleDeNovo_contig_166788	gi|358485511|ref|NC_006088.3_GGA1|	86.94	3201	321	25	1	3145	2418461	2415302	0	3864	1	S
NorthernBobwhite_SimpleDeNovo_contig_20101	gi|358485511|ref|NC_006088.3_GGA1|	83.02	2609	333	21	1555	4125	2424290	2421754	0	2713	4	S
NorthernBobwhite_SimpleDeNovo_contig_43277	gi|358485511|ref|NC_006088.3_GGA1|	85.25	8486	926	76	1	8270	2426601	2434976	0	9620	16	M
NorthernBobwhite_SimpleDeNovo_contig_320095	gi|358485511|ref|NC_006088.3_GGA1|	85.37	41	3	1	5	45	2426619	2426582	0.004	46.4	67	M
NorthernBobwhite_SimpleDeNovo_contig_146026	gi|358485511|ref|NC_006088.3_GGA1|	89.33	1584	128	12	1	1555	2442247	2440676	0	2078	1	S
NorthernBobwhite_SimpleDeNovo_contig_146025	gi|358485511|ref|NC_006088.3_GGA1|	83.69	1827	223	24	1	1775	2442344	2444147	0	1911	2	S
NorthernBobwhite_SimpleDeNovo_contig_229320	gi|358485511|ref|NC_006088.3_GGA1|	87.49	1375	122	13	1986	3320	2447230	2448594	0	1691	13	M
NorthernBobwhite_SimpleDeNovo_contig_372657	gi|358485511|ref|NC_006088.3_GGA1|	96.43	28	1	0	304	331	2447666	2447639	0.003	46.4	700	M
NorthernBobwhite_SimpleDeNovo_contig_188485	gi|358485511|ref|NC_006088.3_GGA1|	92.51	601	44	1	1	600	2450599	2451199	0	877	1	S
NorthernBobwhite_SimpleDeNovo_contig_146229	gi|358485511|ref|NC_006088.3_GGA1|	86.72	1913	191	12	1943	3836	2453195	2451327	0	2307	3	S
NorthernBobwhite_SimpleDeNovo_contig_295517	gi|358485511|ref|NC_006088.3_GGA1|	78.76	193	26	3	180	362	2454448	2454635	5e-40	168	117	M
NorthernBobwhite_SimpleDeNovo_contig_277479	gi|358485511|ref|NC_006088.3_GGA1|	82.99	194	24	2	1	190	2454635	2454447	8e-50	201	3369	M
NorthernBobwhite_SimpleDeNovo_contig_126779	gi|358485511|ref|NC_006088.3_GGA1|	77.73	431	64	10	8	415	2457309	2457730	3e-88	329	1	S
NorthernBobwhite_SimpleDeNovo_contig_126778	gi|358485511|ref|NC_006088.3_GGA1|	87.94	2720	263	19	6	2668	2457321	2454610	0	3400	1	S
NorthernBobwhite_SimpleDeNovo_contig_231448	gi|358485511|ref|NC_006088.3_GGA1|	78.13	407	61	7	4	388	2457730	2457330	9e-88	327	1	S
NorthernBobwhite_SimpleDeNovo_contig_153368	gi|358485511|ref|NC_006088.3_GGA1|	86.29	2174	202	14	1	2135	2462163	2460047	0	2607	2	S
NorthernBobwhite_SimpleDeNovo_contig_109553	gi|358485511|ref|NC_006088.3_GGA1|	86.17	1070	115	9	1090	2127	2463284	2462216	0	1252	2	S
NorthernBobwhite_SimpleDeNovo_contig_50502	gi|358485511|ref|NC_006088.3_GGA1|	84.36	5945	634	50	3	5758	2464286	2470123	0	6578	2	S
NorthernBobwhite_SimpleDeNovo_contig_165843	gi|358485511|ref|NC_006088.3_GGA1|	87.1	31	4	0	579	609	2474067	2474097	1.2	39.2	11	M
NorthernBobwhite_SimpleDeNovo_contig_187841	gi|358485511|ref|NC_006088.3_GGA1|	83.05	2797	281	24	1	2640	2475830	2473070	0	2973	1	S
NorthernBobwhite_SimpleDeNovo_contig_187840	gi|358485511|ref|NC_006088.3_GGA1|	88.71	691	60	2	20	694	2476048	2476736	0	902	1	S
NorthernBobwhite_SimpleDeNovo_contig_57124	gi|358485511|ref|NC_006088.3_GGA1|	89.25	3349	290	21	1	3300	2476817	2480144	0	4385	6	M
NorthernBobwhite_SimpleDeNovo_contig_107018	gi|358485511|ref|NC_006088.3_GGA1|	86.8	1758	217	7	1633	3375	2482157	2480400	0	2107	3	M
NorthernBobwhite_SimpleDeNovo_contig_116141	gi|358485511|ref|NC_006088.3_GGA1|	88.35	1322	117	8	462	1775	2483646	2484938	0	1687	20	M
NorthernBobwhite_SimpleDeNovo_contig_138485	gi|358485511|ref|NC_006088.3_GGA1|	90.4	1573	111	9	1	1544	2485612	2487173	0	2152	529	M
NorthernBobwhite_SimpleDeNovo_contig_89511	gi|358485511|ref|NC_006088.3_GGA1|	85.49	1654	195	8	1	1629	2491611	2489978	0	1905	1	S
NorthernBobwhite_SimpleDeNovo_contig_89510	gi|358485511|ref|NC_006088.3_GGA1|	89.87	2933	225	13	1	2900	2491702	2494595	0	3957	1	S
NorthernBobwhite_SimpleDeNovo_contig_188585	gi|358485511|ref|NC_006088.3_GGA1|	86.21	1769	133	18	122	1863	2496411	2494727	0	2109	1	S
NorthernBobwhite_SimpleDeNovo_contig_188586	gi|358485511|ref|NC_006088.3_GGA1|	89.91	2032	167	12	1078	3080	2497893	2499915	0	2720	2	S
NorthernBobwhite_SimpleDeNovo_contig_24994	gi|358485511|ref|NC_006088.3_GGA1|	86.27	1551	150	15	1	1540	2501498	2500000	0	1826	1	S
NorthernBobwhite_SimpleDeNovo_contig_24993	gi|358485511|ref|NC_006088.3_GGA1|	88.61	3047	261	23	1	2997	2501654	2504664	0	3905	1	S
NorthernBobwhite_SimpleDeNovo_contig_293166	gi|358485511|ref|NC_006088.3_GGA1|	85.1	671	79	6	2	652	2505518	2504849	0	751	1	S
NorthernBobwhite_SimpleDeNovo_contig_194152	gi|358485511|ref|NC_006088.3_GGA1|	89.02	346	36	2	1	345	2505840	2505496	1e-123	446	1	S
NorthernBobwhite_SimpleDeNovo_contig_304185	gi|358485511|ref|NC_006088.3_GGA1|	87.03	347	35	4	1	339	2505840	2505496	6e-114	414	1	S
NorthernBobwhite_SimpleDeNovo_contig_308475	gi|358485511|ref|NC_006088.3_GGA1|	79.86	442	70	5	1	423	2506256	2505815	9e-107	390	1	S
NorthernBobwhite_SimpleDeNovo_contig_308186	gi|358485511|ref|NC_006088.3_GGA1|	87.1	31	4	0	221	251	2509433	2509463	0.52	39.2	6	M
NorthernBobwhite_SimpleDeNovo_contig_48274	gi|358485511|ref|NC_006088.3_GGA1|	87.88	5881	542	50	1	5781	2512243	2506434	0	7321	1	S
NorthernBobwhite_SimpleDeNovo_contig_46320	gi|358485511|ref|NC_006088.3_GGA1|	87.25	4987	459	34	5929	10793	2517261	2512330	0	6132	1217	M
NorthernBobwhite_SimpleDeNovo_contig_132566	gi|358485511|ref|NC_006088.3_GGA1|	88.69	548	59	1	1	545	2524446	2524993	0	708	2	S
NorthernBobwhite_SimpleDeNovo_contig_336852	gi|358485511|ref|NC_006088.3_GGA1|	81.99	372	52	6	1	364	2524471	2524107	2e-96	356	1	S
NorthernBobwhite_SimpleDeNovo_contig_342626	gi|358485511|ref|NC_006088.3_GGA1|	76.88	372	55	7	1	348	2524471	2524107	1e-73	280	1	S
NorthernBobwhite_SimpleDeNovo_contig_13673	gi|358485511|ref|NC_006088.3_GGA1|	89.66	3878	315	23	1	3834	2525342	2529177	0	5160	2	S
NorthernBobwhite_SimpleDeNovo_contig_16651	gi|358485511|ref|NC_006088.3_GGA1|	86.25	4595	479	35	1	4516	2529842	2534362	0	5418	3206	M
NorthernBobwhite_SimpleDeNovo_contig_362991	gi|358485511|ref|NC_006088.3_GGA1|	84.44	45	5	1	318	362	2531002	2530960	0.001	48.2	259	M
NorthernBobwhite_SimpleDeNovo_contig_287576	gi|358485511|ref|NC_006088.3_GGA1|	81.67	431	56	5	1	428	2534337	2534747	2e-115	419	1	S
NorthernBobwhite_SimpleDeNovo_contig_287575	gi|358485511|ref|NC_006088.3_GGA1|	85.18	425	48	5	1	424	2534337	2534747	1e-131	473	1	S
NorthernBobwhite_SimpleDeNovo_contig_62881	gi|358485511|ref|NC_006088.3_GGA1|	87.85	2255	241	13	1	2242	2534722	2536956	0	2803	2	S
NorthernBobwhite_SimpleDeNovo_contig_43621	gi|358485511|ref|NC_006088.3_GGA1|	90.37	4664	356	21	1	4618	2540081	2544697	0	6376	1	S
NorthernBobwhite_SimpleDeNovo_contig_54972	gi|358485511|ref|NC_006088.3_GGA1|	87.3	6904	681	46	938	7725	2545897	2552720	0	8466	5	M
NorthernBobwhite_SimpleDeNovo_contig_42929	gi|358485511|ref|NC_006088.3_GGA1|	88.45	2070	177	16	1	2037	2557132	2555092	0	2639	2	S
NorthernBobwhite_SimpleDeNovo_contig_42928	gi|358485511|ref|NC_006088.3_GGA1|	85.25	488	60	3	18	502	2557639	2558117	2e-155	553	1	S
NorthernBobwhite_SimpleDeNovo_contig_179152	gi|358485511|ref|NC_006088.3_GGA1|	87.56	386	48	0	1	386	2558654	2558269	6e-134	480	1	S
NorthernBobwhite_SimpleDeNovo_contig_120561	gi|358485511|ref|NC_006088.3_GGA1|	85.55	3293	376	17	1702	4964	2560615	2563837	0	3806	2	S
NorthernBobwhite_SimpleDeNovo_contig_15012	gi|358485511|ref|NC_006088.3_GGA1|	90.34	4348	341	21	220	4498	2564557	2568894	0	5925	51	M
NorthernBobwhite_SimpleDeNovo_contig_74718	gi|358485511|ref|NC_006088.3_GGA1|	85.94	1792	179	14	344	2133	2582059	2583779	0	2098	1	S
NorthernBobwhite_SimpleDeNovo_contig_210344	gi|358485511|ref|NC_006088.3_GGA1|	86.36	1914	219	18	2	1889	2585985	2584088	0	2232	1	S
NorthernBobwhite_SimpleDeNovo_contig_82814	gi|358485511|ref|NC_006088.3_GGA1|	89.68	2666	242	9	1	2644	2586359	2589013	0	3557	3	S
NorthernBobwhite_SimpleDeNovo_contig_66873	gi|358485511|ref|NC_006088.3_GGA1|	84.69	1594	186	13	2926	4475	2593456	2595035	0	1768	4	S
NorthernBobwhite_SimpleDeNovo_contig_30681	gi|358485511|ref|NC_006088.3_GGA1|	85.9	2908	281	20	3	2827	2595203	2598064	0	3422	1	S
NorthernBobwhite_SimpleDeNovo_contig_277883	gi|358485511|ref|NC_006088.3_GGA1|	82.38	1867	218	16	115	1907	2599927	2598098	0	1912	1	S
NorthernBobwhite_SimpleDeNovo_contig_191263	gi|358485511|ref|NC_006088.3_GGA1|	86.93	2326	243	21	1	2289	2602704	2600403	0	2785	1	S
NorthernBobwhite_SimpleDeNovo_contig_47020	gi|358485511|ref|NC_006088.3_GGA1|	87.01	5019	497	38	1247	6171	2614509	2609552	0	6080	36	M
NorthernBobwhite_SimpleDeNovo_contig_66876	gi|358485511|ref|NC_006088.3_GGA1|	85.04	1424	157	12	1	1378	2616055	2617468	0	1604	4	M
NorthernBobwhite_SimpleDeNovo_contig_85807	gi|358485511|ref|NC_006088.3_GGA1|	86.03	3064	313	28	1198	4189	2621150	2618130	0	3573	51	M
NorthernBobwhite_SimpleDeNovo_contig_66337	gi|358485511|ref|NC_006088.3_GGA1|	87.82	5747	527	49	1	5620	2622451	2628151	0	7144	1	S
NorthernBobwhite_SimpleDeNovo_contig_270018	gi|358485511|ref|NC_006088.3_GGA1|	87.34	1746	149	13	396	2087	2628343	2630070	0	2159	1	S
NorthernBobwhite_SimpleDeNovo_contig_160634	gi|358485511|ref|NC_006088.3_GGA1|	86.7	5414	497	38	1	5288	2630140	2635456	0	6547	3	M
NorthernBobwhite_SimpleDeNovo_contig_203813	gi|358485511|ref|NC_006088.3_GGA1|	91.33	2065	122	12	2	2025	2638482	2636434	0	2915	8	M
NorthernBobwhite_SimpleDeNovo_contig_203812	gi|358485511|ref|NC_006088.3_GGA1|	85.28	2262	268	21	2521	4765	2638968	2641181	0	2563	9571	M
NorthernBobwhite_SimpleDeNovo_contig_105201	gi|358485511|ref|NC_006088.3_GGA1|	86.47	946	93	7	698	1612	2643485	2642544	0	1130	5458	M
NorthernBobwhite_SimpleDeNovo_contig_25892	gi|358485511|ref|NC_006088.3_GGA1|	87.85	11072	874	104	1	10871	2643567	2654368	0	13860	1	S
NorthernBobwhite_SimpleDeNovo_contig_56332	gi|358485511|ref|NC_006088.3_GGA1|	93.75	32	2	0	3052	3083	2649224	2649193	0.004	50	74	M
NorthernBobwhite_SimpleDeNovo_contig_349322	gi|358485511|ref|NC_006088.3_GGA1|	85.51	345	38	4	8	340	2654353	2654697	9e-107	390	1	S
NorthernBobwhite_SimpleDeNovo_contig_180101	gi|358485511|ref|NC_006088.3_GGA1|	84.93	345	45	3	69	406	2654697	2654353	5e-104	381	1	S
NorthernBobwhite_SimpleDeNovo_contig_29192	gi|358485511|ref|NC_006088.3_GGA1|	84.81	2561	305	17	1169	3687	2656030	2658548	0	2865	2	S
NorthernBobwhite_SimpleDeNovo_contig_98044	gi|358485511|ref|NC_006088.3_GGA1|	84.32	6816	737	49	32	6615	2658580	2665295	0	7551	4	M
NorthernBobwhite_SimpleDeNovo_contig_98156	gi|358485511|ref|NC_006088.3_GGA1|	87.51	2539	241	20	1	2502	2665314	2667813	0	3128	1	S
NorthernBobwhite_SimpleDeNovo_contig_199961	gi|358485511|ref|NC_006088.3_GGA1|	84.05	1931	230	15	822	2729	2668620	2670495	0	2096	4769	M
NorthernBobwhite_SimpleDeNovo_contig_129112	gi|358485511|ref|NC_006088.3_GGA1|	84.75	4740	523	45	2	4603	2671177	2675854	0	5267	1	S
NorthernBobwhite_SimpleDeNovo_contig_197545	gi|358485511|ref|NC_006088.3_GGA1|	81.68	1889	219	15	3	1769	2675924	2677807	0	1894	9	M
NorthernBobwhite_SimpleDeNovo_contig_136001	gi|358485511|ref|NC_006088.3_GGA1|	88.95	3085	258	15	3969	6996	2683035	2679977	0	4033	5	S
NorthernBobwhite_SimpleDeNovo_contig_175731	gi|358485511|ref|NC_006088.3_GGA1|	88.06	2228	217	11	7	2212	2691049	2688849	0	2814	2	S
NorthernBobwhite_SimpleDeNovo_contig_192427	gi|358485511|ref|NC_006088.3_GGA1|	82.18	1117	118	14	1	1060	2691214	2692306	0	1128	1	S
NorthernBobwhite_SimpleDeNovo_contig_227591	gi|358485511|ref|NC_006088.3_GGA1|	83.45	2199	273	22	117	2255	2692327	2694494	0	2307	1	S
NorthernBobwhite_SimpleDeNovo_contig_151315	gi|358485511|ref|NC_006088.3_GGA1|	79.88	338	43	5	8	323	2694808	2694474	8e-81	304	3	M
NorthernBobwhite_SimpleDeNovo_contig_151314	gi|358485511|ref|NC_006088.3_GGA1|	86.38	1630	187	14	1	1608	2694874	2696490	0	1907	733	M
NorthernBobwhite_SimpleDeNovo_contig_350284	gi|358485511|ref|NC_006088.3_GGA1|	85.12	168	22	1	5	169	2698148	2697981	4e-46	188	2705	M
NorthernBobwhite_SimpleDeNovo_contig_194274	gi|358485511|ref|NC_006088.3_GGA1|	80.85	872	135	11	306	1161	2699301	2698446	0	800	199	M
NorthernBobwhite_SimpleDeNovo_contig_292393	gi|358485511|ref|NC_006088.3_GGA1|	89.12	340	32	2	1	339	2700959	2700624	1e-122	443	1	S
NorthernBobwhite_SimpleDeNovo_contig_129606	gi|358485511|ref|NC_006088.3_GGA1|	82.75	1084	139	16	7	1054	2702472	2701401	0	1083	1	S
NorthernBobwhite_SimpleDeNovo_contig_120005	gi|358485511|ref|NC_006088.3_GGA1|	81.67	2340	315	23	3	2244	2708562	2706239	0	2286	1054	M
NorthernBobwhite_SimpleDeNovo_contig_102579	gi|358485511|ref|NC_006088.3_GGA1|	85.97	2830	262	25	1097	3856	2709844	2712608	0	3323	3986	M
NorthernBobwhite_SimpleDeNovo_contig_174695	gi|358485511|ref|NC_006088.3_GGA1|	87.95	2133	190	13	1	2109	2716013	2713924	0	2690	1	S
NorthernBobwhite_SimpleDeNovo_contig_166280	gi|358485511|ref|NC_006088.3_GGA1|	82.95	440	61	4	674	1107	2716506	2716075	3e-124	450	1	S
NorthernBobwhite_SimpleDeNovo_contig_174694	gi|358485511|ref|NC_006088.3_GGA1|	84.82	494	70	4	1	490	2716762	2717254	9e-152	540	1	S
NorthernBobwhite_SimpleDeNovo_contig_355241	gi|358485511|ref|NC_006088.3_GGA1|	82.96	487	60	3	3	467	2716765	2717250	4e-143	511	1	S
NorthernBobwhite_SimpleDeNovo_contig_365541	gi|358485511|ref|NC_006088.3_GGA1|	84.86	449	40	3	2	424	2717233	2717679	3e-144	515	1	S
NorthernBobwhite_SimpleDeNovo_contig_6341	gi|358485511|ref|NC_006088.3_GGA1|	86.05	1656	138	12	3	1576	2719449	2717805	0	1975	1	S
NorthernBobwhite_SimpleDeNovo_contig_97612	gi|358485511|ref|NC_006088.3_GGA1|	87.18	39	4	1	292	329	2726728	2726690	0.015	44.6	710	M
NorthernBobwhite_SimpleDeNovo_contig_37845	gi|358485511|ref|NC_006088.3_GGA1|	85.75	6002	651	45	56	5959	2730697	2724802	0	6951	3	S
NorthernBobwhite_SimpleDeNovo_contig_289961	gi|358485511|ref|NC_006088.3_GGA1|	89.07	247	13	7	179	412	2731136	2730891	3e-81	306	1	S
NorthernBobwhite_SimpleDeNovo_contig_275050	gi|358485511|ref|NC_006088.3_GGA1|	90.08	786	63	6	14	786	2731884	2732667	0	1052	1	S
NorthernBobwhite_SimpleDeNovo_contig_122436	gi|358485511|ref|NC_006088.3_GGA1|	70.27	962	218	8	68	964	2744347	2745305	8e-131	471	11	M
NorthernBobwhite_SimpleDeNovo_contig_361621	gi|358485511|ref|NC_006088.3_GGA1|	77.97	59	12	1	106	164	2759621	2759678	0.012	44.6	14	M
NorthernBobwhite_SimpleDeNovo_contig_51886	gi|358485511|ref|NC_006088.3_GGA1|	85.95	2868	294	19	1	2792	2763936	2761102	0	3368	148	M
NorthernBobwhite_SimpleDeNovo_contig_208007	gi|358485511|ref|NC_006088.3_GGA1|	87.11	1707	181	9	11	1701	2764369	2766052	0	2082	1	S
NorthernBobwhite_SimpleDeNovo_contig_46342	gi|358485511|ref|NC_006088.3_GGA1|	79.23	390	45	9	4	364	2766433	2766815	7e-89	331	1	S
NorthernBobwhite_SimpleDeNovo_contig_218050	gi|358485511|ref|NC_006088.3_GGA1|	81.04	1340	173	19	1	1285	2768127	2766814	0	1260	8	M
NorthernBobwhite_SimpleDeNovo_contig_143661	gi|358485511|ref|NC_006088.3_GGA1|	83.19	5497	627	49	1908	7218	2773656	2768271	0	5804	2	S
NorthernBobwhite_SimpleDeNovo_contig_143660	gi|358485511|ref|NC_006088.3_GGA1|	87.01	2840	300	20	1049	3831	2776642	2779469	0	3431	2	S
NorthernBobwhite_SimpleDeNovo_contig_198749	gi|358485511|ref|NC_006088.3_GGA1|	89.96	946	85	4	1041	1986	2781434	2782369	0	1269	2	S
NorthernBobwhite_SimpleDeNovo_contig_300244	gi|358485511|ref|NC_006088.3_GGA1|	84.71	314	29	4	1	295	2783201	2782888	3e-94	349	1	S
NorthernBobwhite_SimpleDeNovo_contig_200731	gi|358485511|ref|NC_006088.3_GGA1|	87.36	2286	224	14	3	2257	2785433	2783182	0	2816	1	S
NorthernBobwhite_SimpleDeNovo_contig_325348	gi|358485511|ref|NC_006088.3_GGA1|	78.85	780	86	9	1	748	2785507	2786239	0	693	1	S
NorthernBobwhite_SimpleDeNovo_contig_324696	gi|358485511|ref|NC_006088.3_GGA1|	92.86	28	2	0	1184	1211	2786858	2786831	0.25	42.8	17	M
NorthernBobwhite_SimpleDeNovo_contig_156339	gi|358485511|ref|NC_006088.3_GGA1|	83.71	1774	164	26	1	1679	2788041	2786298	0	1893	1	S
NorthernBobwhite_SimpleDeNovo_contig_149733	gi|358485511|ref|NC_006088.3_GGA1|	85.21	1704	179	13	1	1685	2790498	2788849	0	1945	2	S
NorthernBobwhite_SimpleDeNovo_contig_149734	gi|358485511|ref|NC_006088.3_GGA1|	81.61	5607	645	60	1	5367	2790585	2796045	0	5541	4	M
NorthernBobwhite_SimpleDeNovo_contig_307488	gi|358485511|ref|NC_006088.3_GGA1|	82.98	47	5	1	285	331	2794157	2794200	0.002	48.2	28	M
NorthernBobwhite_SimpleDeNovo_contig_225636	gi|358485511|ref|NC_006088.3_GGA1|	80.08	251	34	2	213	448	2798063	2798312	2e-59	233	2	M
NorthernBobwhite_SimpleDeNovo_contig_262232	gi|358485511|ref|NC_006088.3_GGA1|	89.47	38	4	0	5441	5478	2798311	2798348	0.002	51.8	160	M
NorthernBobwhite_SimpleDeNovo_contig_133055	gi|358485511|ref|NC_006088.3_GGA1|	84.14	3058	343	27	740	3696	2803412	2800396	0	3335	2895	M
NorthernBobwhite_SimpleDeNovo_contig_306013	gi|358485511|ref|NC_006088.3_GGA1|	92.92	452	28	2	1	449	2804307	2804757	0	666	1	S
NorthernBobwhite_SimpleDeNovo_contig_166668	gi|358485511|ref|NC_006088.3_GGA1|	87.07	1036	121	4	416	1438	2805850	2806885	0	1258	2	S
NorthernBobwhite_SimpleDeNovo_contig_333131	gi|358485511|ref|NC_006088.3_GGA1|	92.92	113	8	0	1	113	2807120	2807008	5e-40	168	1	S
NorthernBobwhite_SimpleDeNovo_contig_3042	gi|358485511|ref|NC_006088.3_GGA1|	85.32	2371	278	12	24	2353	2809542	2807201	0	2717	1	S
NorthernBobwhite_SimpleDeNovo_contig_3043	gi|358485511|ref|NC_006088.3_GGA1|	88.28	2953	298	14	1614	4556	2810526	2813440	0	3746	6238	M
NorthernBobwhite_SimpleDeNovo_contig_120765	gi|358485511|ref|NC_006088.3_GGA1|	86.64	494	56	5	1	492	2814104	2813619	1e-163	580	1	S
NorthernBobwhite_SimpleDeNovo_contig_29614	gi|358485511|ref|NC_006088.3_GGA1|	83.86	1667	186	9	1	1598	2815771	2814119	0	1828	6	M
NorthernBobwhite_SimpleDeNovo_contig_30290	gi|358485511|ref|NC_006088.3_GGA1|	76.93	789	115	14	7	763	2816032	2816785	2e-169	600	1	S
NorthernBobwhite_SimpleDeNovo_contig_202608	gi|358485511|ref|NC_006088.3_GGA1|	86.31	811	100	7	1	805	2817647	2816842	0	940	1	S
NorthernBobwhite_SimpleDeNovo_contig_201780	gi|358485511|ref|NC_006088.3_GGA1|	84.96	1217	126	12	1874	3047	2820487	2821689	0	1368	3	S
NorthernBobwhite_SimpleDeNovo_contig_222129	gi|358485511|ref|NC_006088.3_GGA1|	83.48	587	71	7	1	564	2821730	2822313	6e-174	614	1	S
NorthernBobwhite_SimpleDeNovo_contig_103405	gi|358485511|ref|NC_006088.3_GGA1|	86.44	1733	194	17	780	2487	2826367	2824651	0	2026	40	M
NorthernBobwhite_SimpleDeNovo_contig_22391	gi|358485511|ref|NC_006088.3_GGA1|	83.54	3877	405	39	5	3738	2834460	2830674	0	4150	2	S
NorthernBobwhite_SimpleDeNovo_contig_22392	gi|358485511|ref|NC_006088.3_GGA1|	87.64	5129	479	46	5522	10557	2840911	2845977	0	6323	3	S
NorthernBobwhite_SimpleDeNovo_contig_196161	gi|358485511|ref|NC_006088.3_GGA1|	77.96	313	48	5	20	331	2846930	2847222	2e-64	250	16	M
NorthernBobwhite_SimpleDeNovo_contig_196159	gi|358485511|ref|NC_006088.3_GGA1|	79.35	310	46	3	20	328	2846930	2847222	1e-71	273	51	M
NorthernBobwhite_SimpleDeNovo_contig_181150	gi|358485511|ref|NC_006088.3_GGA1|	88.55	978	92	7	43	1008	2848166	2847197	0	1245	1	S
NorthernBobwhite_SimpleDeNovo_contig_278075	gi|358485511|ref|NC_006088.3_GGA1|	82.19	629	82	7	1	619	2848209	2848817	4e-177	625	3696	M
NorthernBobwhite_SimpleDeNovo_contig_86982	gi|358485511|ref|NC_006088.3_GGA1|	90.5	1947	157	9	1558	3480	2850895	2848953	0	2663	2	S
NorthernBobwhite_SimpleDeNovo_contig_86983	gi|358485511|ref|NC_006088.3_GGA1|	82.23	2346	304	28	648	2934	2852643	2854934	0	2327	3	S
NorthernBobwhite_SimpleDeNovo_contig_192419	gi|358485511|ref|NC_006088.3_GGA1|	85.32	3686	417	27	880	4476	2855945	2859595	0	4199	2207	M
NorthernBobwhite_SimpleDeNovo_contig_199931	gi|358485511|ref|NC_006088.3_GGA1|	89.39	1084	94	7	1	1065	2864819	2863738	0	1424	3	S
NorthernBobwhite_SimpleDeNovo_contig_123637	gi|358485511|ref|NC_006088.3_GGA1|	87.01	3688	400	21	1	3616	2868628	2864948	0	4468	1	S
NorthernBobwhite_SimpleDeNovo_contig_90418	gi|358485511|ref|NC_006088.3_GGA1|	84.9	927	121	8	1	916	2868819	2869737	0	1021	1	S
NorthernBobwhite_SimpleDeNovo_contig_11984	gi|358485511|ref|NC_006088.3_GGA1|	87.67	1387	135	12	1415	2778	2872204	2870831	0	1709	3	S
NorthernBobwhite_SimpleDeNovo_contig_11985	gi|358485511|ref|NC_006088.3_GGA1|	85.63	3667	419	33	3	3605	2873871	2877493	0	4186	2276	M
NorthernBobwhite_SimpleDeNovo_contig_95888	gi|358485511|ref|NC_006088.3_GGA1|	85.71	35	5	0	90	124	2875656	2875690	0.24	41	21	M
NorthernBobwhite_SimpleDeNovo_contig_69135	gi|358485511|ref|NC_006088.3_GGA1|	83.88	2085	231	18	1	2009	2880956	2883011	0	2277	1	S
NorthernBobwhite_SimpleDeNovo_contig_298132	gi|358485511|ref|NC_006088.3_GGA1|	84.83	811	93	8	48	840	2883515	2884313	0	899	1	S
NorthernBobwhite_SimpleDeNovo_contig_116723	gi|358485511|ref|NC_006088.3_GGA1|	88.02	1536	160	8	264	1790	2885949	2884429	0	1927	1	S
NorthernBobwhite_SimpleDeNovo_contig_116722	gi|358485511|ref|NC_006088.3_GGA1|	81.82	3228	385	37	2	3076	2886086	2889264	0	3191	1	S
NorthernBobwhite_SimpleDeNovo_contig_68117	gi|358485511|ref|NC_006088.3_GGA1|	82.21	2574	272	29	11	2467	2889482	2891986	0	2614	4400	M
NorthernBobwhite_SimpleDeNovo_contig_207742	gi|358485511|ref|NC_006088.3_GGA1|	90.59	563	45	5	271	828	2891994	2892553	0	762	17882	M
NorthernBobwhite_SimpleDeNovo_contig_343225	gi|358485511|ref|NC_006088.3_GGA1|	78.32	226	40	3	49	266	2898851	2898627	6e-44	181	799	M
NorthernBobwhite_SimpleDeNovo_contig_311887	gi|358485511|ref|NC_006088.3_GGA1|	77.43	226	42	3	57	274	2898851	2898627	3e-41	172	1012	M
NorthernBobwhite_SimpleDeNovo_contig_14605	gi|358485511|ref|NC_006088.3_GGA1|	85.85	4459	469	31	1	4386	2899225	2903594	0	5204	3444	M
NorthernBobwhite_SimpleDeNovo_contig_167806	gi|358485511|ref|NC_006088.3_GGA1|	88.89	36	4	0	36070	36105	2902814	2902779	0.15	48.2	20	M
NorthernBobwhite_SimpleDeNovo_contig_241294	gi|358485511|ref|NC_006088.3_GGA1|	79.92	239	42	5	6	243	2903635	2903868	2e-48	197	9101	M
NorthernBobwhite_SimpleDeNovo_contig_333046	gi|358485511|ref|NC_006088.3_GGA1|	78.79	198	24	4	86	273	2903833	2903644	2e-39	167	12185	M
NorthernBobwhite_SimpleDeNovo_contig_160348	gi|358485511|ref|NC_006088.3_GGA1|	83.26	233	34	3	724	955	2903877	2903649	1e-59	235	6	M
NorthernBobwhite_SimpleDeNovo_contig_278869	gi|358485511|ref|NC_006088.3_GGA1|	81.53	157	27	1	18	172	2909980	2909824	1e-34	150	6405	M
NorthernBobwhite_SimpleDeNovo_contig_76662	gi|358485511|ref|NC_006088.3_GGA1|	86.17	1056	106	7	885	1913	2912320	2913362	0	1251	2	S
NorthernBobwhite_SimpleDeNovo_contig_107160	gi|358485511|ref|NC_006088.3_GGA1|	88.41	604	63	3	1	602	2913608	2914206	0	767	1216	M
NorthernBobwhite_SimpleDeNovo_contig_294046	gi|358485511|ref|NC_006088.3_GGA1|	90.15	1167	102	7	2	1162	2916176	2915017	0	1566	1	S
NorthernBobwhite_SimpleDeNovo_contig_209367	gi|358485511|ref|NC_006088.3_GGA1|	88.84	2984	293	12	14	2987	2916314	2919267	0	3862	6	M
NorthernBobwhite_SimpleDeNovo_contig_60673	gi|358485511|ref|NC_006088.3_GGA1|	85.4	3506	366	37	1238	4620	2925931	2922449	0	3979	3	S
NorthernBobwhite_SimpleDeNovo_contig_230951	gi|358485511|ref|NC_006088.3_GGA1|	86.3	2459	262	19	1	2392	2927155	2929605	0	2897	1	S
NorthernBobwhite_SimpleDeNovo_contig_82502	gi|358485511|ref|NC_006088.3_GGA1|	84.09	3255	364	33	148	3308	2930176	2933370	0	3525	2	S
NorthernBobwhite_SimpleDeNovo_contig_302464	gi|358485511|ref|NC_006088.3_GGA1|	83.94	990	132	8	6	981	2934320	2935296	0	1058	1	S
NorthernBobwhite_SimpleDeNovo_contig_198238	gi|358485511|ref|NC_006088.3_GGA1|	82.33	549	74	5	1	536	2936367	2936905	6e-155	551	1	S
NorthernBobwhite_SimpleDeNovo_contig_244923	gi|358485511|ref|NC_006088.3_GGA1|	78.3	424	60	5	194	594	2936779	2936365	3e-96	356	1	S
NorthernBobwhite_SimpleDeNovo_contig_249008	gi|358485511|ref|NC_006088.3_GGA1|	85.71	175	18	6	185	355	2937265	2937436	2e-44	183	1	S
NorthernBobwhite_SimpleDeNovo_contig_249007	gi|358485511|ref|NC_006088.3_GGA1|	77.74	647	76	9	1	579	2938057	2937411	4e-151	538	1	S
NorthernBobwhite_SimpleDeNovo_contig_118942	gi|358485511|ref|NC_006088.3_GGA1|	89.89	1256	104	9	1	1247	2938290	2939531	0	1673	1	S
NorthernBobwhite_SimpleDeNovo_contig_177825	gi|358485511|ref|NC_006088.3_GGA1|	85.38	595	65	4	1	594	2939670	2940243	0	682	1275	M
NorthernBobwhite_SimpleDeNovo_contig_21168	gi|358485511|ref|NC_006088.3_GGA1|	86.05	1068	110	7	1	1042	2940302	2941356	0	1258	2	S
NorthernBobwhite_SimpleDeNovo_contig_327939	gi|358485511|ref|NC_006088.3_GGA1|	80.89	293	41	2	1	293	2941647	2941370	9e-74	280	1	S
NorthernBobwhite_SimpleDeNovo_contig_339676	gi|358485511|ref|NC_006088.3_GGA1|	80.46	302	44	2	1	302	2941656	2941370	7e-75	284	1	S
NorthernBobwhite_SimpleDeNovo_contig_78160	gi|358485511|ref|NC_006088.3_GGA1|	85.34	1071	127	11	1	1059	2942839	2941787	0	1202	1	S
NorthernBobwhite_SimpleDeNovo_contig_44705	gi|358485511|ref|NC_006088.3_GGA1|	86.69	2931	306	20	1314	4169	2945827	2942906	0	3514	2	S
NorthernBobwhite_SimpleDeNovo_contig_44704	gi|358485511|ref|NC_006088.3_GGA1|	86.41	1729	201	12	1	1704	2947590	2949309	0	2035	1	S
NorthernBobwhite_SimpleDeNovo_contig_123340	gi|358485511|ref|NC_006088.3_GGA1|	84.71	1583	159	9	1	1583	2950450	2951949	0	1799	1	S
NorthernBobwhite_SimpleDeNovo_contig_217796	gi|358485511|ref|NC_006088.3_GGA1|	84.98	619	81	4	128	736	2952615	2953231	0	690	1	S
NorthernBobwhite_SimpleDeNovo_contig_84977	gi|358485511|ref|NC_006088.3_GGA1|	83.49	4826	577	51	1600	6288	2960405	2955663	0	5079	84	M
NorthernBobwhite_SimpleDeNovo_contig_68441	gi|358485511|ref|NC_006088.3_GGA1|	87.24	4106	421	29	27	4065	2965622	2961553	0	5005	1	S
NorthernBobwhite_SimpleDeNovo_contig_154254	gi|358485511|ref|NC_006088.3_GGA1|	85.79	3928	429	40	18	3866	2970872	2966995	0	4504	2	S
NorthernBobwhite_SimpleDeNovo_contig_154255	gi|358485511|ref|NC_006088.3_GGA1|	86.66	2969	279	27	95	2979	2970888	2973823	0	3553	2952	M
NorthernBobwhite_SimpleDeNovo_contig_72899	gi|358485511|ref|NC_006088.3_GGA1|	84.3	2095	222	29	5	2028	2976167	2974109	0	2260	1	S
NorthernBobwhite_SimpleDeNovo_contig_72898	gi|358485511|ref|NC_006088.3_GGA1|	86.6	5240	528	40	1	5165	2976243	2981383	0	6262	2	S
NorthernBobwhite_SimpleDeNovo_contig_267061	gi|358485511|ref|NC_006088.3_GGA1|	86.14	1335	146	10	1	1315	2982379	2983694	0	1564	1	S
NorthernBobwhite_SimpleDeNovo_contig_261303	gi|358485511|ref|NC_006088.3_GGA1|	82.45	2251	292	22	1	2176	2984192	2986414	0	2273	2	S
NorthernBobwhite_SimpleDeNovo_contig_128094	gi|358485511|ref|NC_006088.3_GGA1|	83.72	6462	791	59	5409	11655	2992609	2999024	0	6881	1552	M
NorthernBobwhite_SimpleDeNovo_contig_278280	gi|358485511|ref|NC_006088.3_GGA1|	83.88	639	81	3	1	620	2999759	2999124	0	695	1	S
NorthernBobwhite_SimpleDeNovo_contig_111907	gi|358485511|ref|NC_006088.3_GGA1|	85.71	2506	282	21	1	2460	3002362	2999887	0	2879	1	S
NorthernBobwhite_SimpleDeNovo_contig_111906	gi|358485511|ref|NC_006088.3_GGA1|	86.29	3334	353	20	1	3246	3002488	3005805	0	3956	1	S
NorthernBobwhite_SimpleDeNovo_contig_177338	gi|358485511|ref|NC_006088.3_GGA1|	86.9	1862	206	14	6	1851	3009654	3007815	0	2230	3	S
NorthernBobwhite_SimpleDeNovo_contig_226878	gi|358485511|ref|NC_006088.3_GGA1|	83.48	799	77	12	1	778	3009781	3010545	0	841	2	S
NorthernBobwhite_SimpleDeNovo_contig_182541	gi|358485511|ref|NC_006088.3_GGA1|	87.29	1306	113	10	1	1260	3012422	3011124	0	1609	1	S
NorthernBobwhite_SimpleDeNovo_contig_241234	gi|358485511|ref|NC_006088.3_GGA1|	74.67	1137	210	12	283	1378	3012639	3013738	0	769	1	S
NorthernBobwhite_SimpleDeNovo_contig_182542	gi|358485511|ref|NC_006088.3_GGA1|	82.85	956	129	6	3	936	3013837	3014779	0	989	2	S
NorthernBobwhite_SimpleDeNovo_contig_60669	gi|358485511|ref|NC_006088.3_GGA1|	81.27	1570	217	11	834	2332	3017284	3015721	0	1526	2	S
NorthernBobwhite_SimpleDeNovo_contig_148139	gi|358485511|ref|NC_006088.3_GGA1|	86.74	1305	142	7	1270	2570	3020390	3021667	0	1570	5	M
NorthernBobwhite_SimpleDeNovo_contig_369283	gi|358485511|ref|NC_006088.3_GGA1|	100	21	0	0	581	601	3023951	3023971	1	39.2	1	S
NorthernBobwhite_SimpleDeNovo_contig_194483	gi|358485511|ref|NC_006088.3_GGA1|	88.52	1952	157	21	1	1918	3025181	3023263	0	2477	1	S
NorthernBobwhite_SimpleDeNovo_contig_234726	gi|358485511|ref|NC_006088.3_GGA1|	83.6	994	109	15	1	965	3027497	3028465	0	1040	1	S
NorthernBobwhite_SimpleDeNovo_contig_93658	gi|358485511|ref|NC_006088.3_GGA1|	83.62	2210	239	18	5	2136	3027508	3025344	0	2383	1	S
NorthernBobwhite_SimpleDeNovo_contig_309701	gi|358485511|ref|NC_006088.3_GGA1|	80.16	761	79	12	1	708	3029478	3028737	0	702	1	S
NorthernBobwhite_SimpleDeNovo_contig_28405	gi|358485511|ref|NC_006088.3_GGA1|	81.68	1681	202	20	1190	2799	3031642	3033287	0	1649	2	S
NorthernBobwhite_SimpleDeNovo_contig_122222	gi|358485511|ref|NC_006088.3_GGA1|	89.08	3222	234	27	5	3158	3038813	3035642	0	4208	3	S
NorthernBobwhite_SimpleDeNovo_contig_158759	gi|358485511|ref|NC_006088.3_GGA1|	85.17	2731	316	29	2	2671	3038968	3041670	0	3048	3	S
NorthernBobwhite_SimpleDeNovo_contig_205861	gi|358485511|ref|NC_006088.3_GGA1|	82.4	1227	158	16	1142	2345	3046939	3045748	0	1220	2	S
NorthernBobwhite_SimpleDeNovo_contig_117789	gi|358485511|ref|NC_006088.3_GGA1|	86.2	2514	266	32	1578	4043	3050647	3048167	0	2899	2	S
NorthernBobwhite_SimpleDeNovo_contig_281840	gi|358485511|ref|NC_006088.3_GGA1|	91.34	127	11	0	97	223	3052884	3053010	2e-43	179	5642	M
NorthernBobwhite_SimpleDeNovo_contig_301396	gi|358485511|ref|NC_006088.3_GGA1|	77.15	337	52	5	5	321	3053086	3052755	1e-67	260	48	M
NorthernBobwhite_SimpleDeNovo_contig_322873	gi|358485511|ref|NC_006088.3_GGA1|	79.04	334	48	4	5	318	3053086	3052755	2e-76	289	154	M
NorthernBobwhite_SimpleDeNovo_contig_274220	gi|358485511|ref|NC_006088.3_GGA1|	88.98	245	27	0	14	258	3053100	3052856	2e-85	320	978	M
NorthernBobwhite_SimpleDeNovo_contig_117790	gi|358485511|ref|NC_006088.3_GGA1|	80.71	819	109	15	142	919	3053559	3054369	0	742	166	M
NorthernBobwhite_SimpleDeNovo_contig_331982	gi|358485511|ref|NC_006088.3_GGA1|	84.1	346	34	4	2	330	3054436	3054777	4e-103	378	1	S
NorthernBobwhite_SimpleDeNovo_contig_262086	gi|358485511|ref|NC_006088.3_GGA1|	80.36	443	81	1	1	443	3054753	3055189	6e-112	408	2	S
NorthernBobwhite_SimpleDeNovo_contig_262085	gi|358485511|ref|NC_006088.3_GGA1|	81.63	441	77	1	289	729	3055189	3054753	2e-118	430	2	S
NorthernBobwhite_SimpleDeNovo_contig_184892	gi|358485511|ref|NC_006088.3_GGA1|	82.64	2068	247	27	79	2111	3057721	3055731	0	2091	1	S
NorthernBobwhite_SimpleDeNovo_contig_201221	gi|358485511|ref|NC_006088.3_GGA1|	78.5	307	46	4	172	459	3058329	3058024	2e-66	257	2	S
NorthernBobwhite_SimpleDeNovo_contig_348737	gi|358485511|ref|NC_006088.3_GGA1|	78.21	78	14	2	948	1024	3058334	3058409	2e-06	59	139	M
NorthernBobwhite_SimpleDeNovo_contig_364599	gi|358485511|ref|NC_006088.3_GGA1|	85.42	48	6	1	185	231	3058389	3058342	0.0001	51.8	24	M
NorthernBobwhite_SimpleDeNovo_contig_316697	gi|358485511|ref|NC_006088.3_GGA1|	77.46	71	13	2	221	291	3058453	3058386	0.0005	50	35	M
NorthernBobwhite_SimpleDeNovo_contig_209376	gi|358485511|ref|NC_006088.3_GGA1|	84.1	195	30	1	259	453	3058470	3058663	7e-52	208	1	S
NorthernBobwhite_SimpleDeNovo_contig_98045	gi|358485511|ref|NC_006088.3_GGA1|	82.65	4593	590	63	1	4460	3063158	3058640	0	4592	27	M
NorthernBobwhite_SimpleDeNovo_contig_203948	gi|358485511|ref|NC_006088.3_GGA1|	84.97	479	59	5	147	619	3063639	3063168	2e-148	529	1	S
NorthernBobwhite_SimpleDeNovo_contig_192489	gi|358485511|ref|NC_006088.3_GGA1|	84.82	1008	98	13	1	994	3064671	3063705	0	1119	1	S
NorthernBobwhite_SimpleDeNovo_contig_162607	gi|358485511|ref|NC_006088.3_GGA1|	88.51	3124	283	28	1625	4727	3070051	3066983	0	3957	4	S
NorthernBobwhite_SimpleDeNovo_contig_91629	gi|358485511|ref|NC_006088.3_GGA1|	83.85	3090	383	23	1651	4657	3074650	3077706	0	3324	4	S
NorthernBobwhite_SimpleDeNovo_contig_250260	gi|358485511|ref|NC_006088.3_GGA1|	82.9	579	78	6	108	677	3083146	3083712	8e-167	590	1	S
NorthernBobwhite_SimpleDeNovo_contig_138780	gi|358485511|ref|NC_006088.3_GGA1|	84.67	7665	820	85	7883	15319	3096401	3088864	0	8462	8299	M
NorthernBobwhite_SimpleDeNovo_contig_135522	gi|358485511|ref|NC_006088.3_GGA1|	85.61	2002	200	23	2	1945	3106244	3104273	0	2287	1	S
NorthernBobwhite_SimpleDeNovo_contig_176908	gi|358485511|ref|NC_006088.3_GGA1|	85.02	881	116	8	855	1727	3107098	3107970	0	973	2	S
NorthernBobwhite_SimpleDeNovo_contig_14976	gi|358485511|ref|NC_006088.3_GGA1|	84.74	4973	550	58	1	4867	3108056	3112925	0	5474	2	S
NorthernBobwhite_SimpleDeNovo_contig_210643	gi|358485511|ref|NC_006088.3_GGA1|	84.81	1573	179	19	289	1820	3115277	3116830	0	1728	1	S
NorthernBobwhite_SimpleDeNovo_contig_358461	gi|358485511|ref|NC_006088.3_GGA1|	80.58	345	39	9	1	343	3116985	3117303	2e-81	306	1	S
NorthernBobwhite_SimpleDeNovo_contig_166017	gi|358485511|ref|NC_006088.3_GGA1|	79.22	717	102	10	913	1591	3118112	3117405	4e-175	619	4009	M
NorthernBobwhite_SimpleDeNovo_contig_166018	gi|358485511|ref|NC_006088.3_GGA1|	80.91	3085	376	48	1	3002	3118572	3121526	0	2884	1	S
NorthernBobwhite_SimpleDeNovo_contig_57536	gi|358485511|ref|NC_006088.3_GGA1|	86.36	1298	139	12	380	1652	3123536	3122252	0	1523	2	S
NorthernBobwhite_SimpleDeNovo_contig_27671	gi|358485511|ref|NC_006088.3_GGA1|	78.83	4984	683	77	1540	6318	3128625	3123809	0	4221	3	S
NorthernBobwhite_SimpleDeNovo_contig_242028	gi|358485511|ref|NC_006088.3_GGA1|	80.34	1185	147	19	366	1513	3132000	3133135	0	1079	1	S
NorthernBobwhite_SimpleDeNovo_contig_108698	gi|358485511|ref|NC_006088.3_GGA1|	82.27	643	87	10	1	622	3133398	3134034	4e-177	625	1	S
NorthernBobwhite_SimpleDeNovo_contig_253529	gi|358485511|ref|NC_006088.3_GGA1|	72.52	393	54	8	24	404	3134510	3134160	4e-60	235	1	S
NorthernBobwhite_SimpleDeNovo_contig_250659	gi|358485511|ref|NC_006088.3_GGA1|	69.53	791	95	24	208	875	3134714	3135481	3e-98	363	1	S
NorthernBobwhite_SimpleDeNovo_contig_93847	gi|358485511|ref|NC_006088.3_GGA1|	85.66	2573	288	19	700	3219	3138443	3135899	0	2964	2	S
NorthernBobwhite_SimpleDeNovo_contig_60176	gi|358485511|ref|NC_006088.3_GGA1|	88.8	7162	633	40	3	7054	3146490	3139388	0	9272	1	S
NorthernBobwhite_SimpleDeNovo_contig_235811	gi|358485511|ref|NC_006088.3_GGA1|	87.67	219	23	1	420	638	3147408	3147194	4e-71	273	216	M
NorthernBobwhite_SimpleDeNovo_contig_289958	gi|358485511|ref|NC_006088.3_GGA1|	84.25	273	35	4	66	336	3148012	3148278	6e-76	288	89	M
NorthernBobwhite_SimpleDeNovo_contig_22251	gi|358485511|ref|NC_006088.3_GGA1|	92.18	2007	139	6	1	1994	3150443	3148442	0	2908	1	S
NorthernBobwhite_SimpleDeNovo_contig_223777	gi|358485511|ref|NC_006088.3_GGA1|	88.04	669	75	3	1	666	3151404	3150738	0	838	1	S
NorthernBobwhite_SimpleDeNovo_contig_216366	gi|358485511|ref|NC_006088.3_GGA1|	90	540	47	3	3	537	3152374	3151837	0	724	2	S
NorthernBobwhite_SimpleDeNovo_contig_52505	gi|358485511|ref|NC_006088.3_GGA1|	85.41	3530	321	32	1	3391	3152478	3155952	0	4075	1	S
NorthernBobwhite_SimpleDeNovo_contig_145509	gi|358485511|ref|NC_006088.3_GGA1|	86.72	625	68	7	5	623	3156004	3156619	0	735	2	S
NorthernBobwhite_SimpleDeNovo_contig_104042	gi|358485511|ref|NC_006088.3_GGA1|	84.62	2452	236	20	2095	4459	3159586	3157189	0	2760	11	M
NorthernBobwhite_SimpleDeNovo_contig_48617	gi|358485511|ref|NC_006088.3_GGA1|	84.97	346	44	4	1	342	3162206	3162547	1e-103	379	1	S
NorthernBobwhite_SimpleDeNovo_contig_13324	gi|358485511|ref|NC_006088.3_GGA1|	83.69	1760	197	13	8	1707	3164339	3162610	0	1903	1	S
NorthernBobwhite_SimpleDeNovo_contig_288555	gi|358485511|ref|NC_006088.3_GGA1|	72.41	203	32	3	3	195	3164533	3164345	5e-26	122	87	M
NorthernBobwhite_SimpleDeNovo_contig_363388	gi|358485511|ref|NC_006088.3_GGA1|	72.41	203	32	3	3	195	3164533	3164345	5e-26	122	40	M
NorthernBobwhite_SimpleDeNovo_contig_7185	gi|358485511|ref|NC_006088.3_GGA1|	86.53	1760	188	10	1	1723	3166462	3164715	0	2105	31	M
NorthernBobwhite_SimpleDeNovo_contig_7184	gi|358485511|ref|NC_006088.3_GGA1|	83.52	1930	196	17	344	2160	3167566	3169486	0	2080	2	S
NorthernBobwhite_SimpleDeNovo_contig_260251	gi|358485511|ref|NC_006088.3_GGA1|	77.47	577	75	3	1	576	3169631	3170153	5e-137	491	1	S
NorthernBobwhite_SimpleDeNovo_contig_209633	gi|358485511|ref|NC_006088.3_GGA1|	85.96	2443	257	25	2280	4647	3173463	3171032	0	2834	24	M
NorthernBobwhite_SimpleDeNovo_contig_343290	gi|358485511|ref|NC_006088.3_GGA1|	90	30	3	0	479	508	3176385	3176414	0.38	41	17	M
NorthernBobwhite_SimpleDeNovo_contig_71903	gi|358485511|ref|NC_006088.3_GGA1|	84.79	1289	150	6	5	1279	3176472	3177728	0	1456	1	S
NorthernBobwhite_SimpleDeNovo_contig_366534	gi|358485511|ref|NC_006088.3_GGA1|	86.32	307	32	1	10	306	3178348	3178042	2e-100	369	1	S
NorthernBobwhite_SimpleDeNovo_contig_164793	gi|358485511|ref|NC_006088.3_GGA1|	88.13	2417	205	13	1	2348	3178387	3180790	0	3081	2	S
NorthernBobwhite_SimpleDeNovo_contig_179309	gi|358485511|ref|NC_006088.3_GGA1|	87.64	1052	114	8	749	1794	3182525	3181484	0	1290	9113	M
NorthernBobwhite_SimpleDeNovo_contig_207093	gi|358485511|ref|NC_006088.3_GGA1|	77.54	285	60	2	21	301	3183272	3183556	7e-56	221	11	M
NorthernBobwhite_SimpleDeNovo_contig_179677	gi|358485511|ref|NC_006088.3_GGA1|	81.09	238	45	0	74	311	3183274	3183511	2e-57	226	48	M
NorthernBobwhite_SimpleDeNovo_contig_29164	gi|358485511|ref|NC_006088.3_GGA1|	87.8	1688	166	11	3	1668	3186009	3184340	0	2102	2	S
NorthernBobwhite_SimpleDeNovo_contig_121174	gi|358485511|ref|NC_006088.3_GGA1|	87.84	6974	600	42	2070	8927	3188730	3195571	0	8789	728	M
NorthernBobwhite_SimpleDeNovo_contig_237098	gi|358485511|ref|NC_006088.3_GGA1|	83.17	1818	161	13	1	1755	3198169	3196434	0	1972	1	S
NorthernBobwhite_SimpleDeNovo_contig_201893	gi|358485511|ref|NC_006088.3_GGA1|	80.42	996	125	17	181	1117	3200419	3199435	0	904	27	M
NorthernBobwhite_SimpleDeNovo_contig_14162	gi|358485511|ref|NC_006088.3_GGA1|	89.29	868	83	4	69	928	3200438	3201303	0	1137	1	S
NorthernBobwhite_SimpleDeNovo_contig_206121	gi|358485511|ref|NC_006088.3_GGA1|	80.84	574	63	5	1	528	3201357	3201929	1e-157	560	1	S
NorthernBobwhite_SimpleDeNovo_contig_230878	gi|358485511|ref|NC_006088.3_GGA1|	100	23	0	0	239	261	3204473	3204451	0.04	42.8	49	M
NorthernBobwhite_SimpleDeNovo_contig_181858	gi|358485511|ref|NC_006088.3_GGA1|	84.44	45	5	1	241	285	3206375	3206333	0.001	48.2	79	M
NorthernBobwhite_SimpleDeNovo_contig_26783	gi|358485511|ref|NC_006088.3_GGA1|	85.37	4423	485	46	117	4442	3206525	3202168	0	4998	1	S
NorthernBobwhite_SimpleDeNovo_contig_294371	gi|358485511|ref|NC_006088.3_GGA1|	82.31	407	30	7	1	389	3206733	3207115	2e-114	416	1	S
NorthernBobwhite_SimpleDeNovo_contig_370530	gi|358485511|ref|NC_006088.3_GGA1|	88.89	36	4	0	180	215	3208359	3208324	0.001	48.2	74	M
NorthernBobwhite_SimpleDeNovo_contig_31497	gi|358485511|ref|NC_006088.3_GGA1|	74.09	3354	504	81	282	3358	3210642	3213907	0	2094	2	S
NorthernBobwhite_SimpleDeNovo_contig_153215	gi|358485511|ref|NC_006088.3_GGA1|	76.04	2333	323	48	151	2297	3214886	3217168	0	1683	1	S
NorthernBobwhite_SimpleDeNovo_contig_95951	gi|358485511|ref|NC_006088.3_GGA1|	78.4	8187	1230	139	2	7824	3217369	3225381	0	6652	3	S
NorthernBobwhite_SimpleDeNovo_contig_323627	gi|358485511|ref|NC_006088.3_GGA1|	82.13	621	83	9	27	640	3229877	3229278	4e-171	605	1	S
NorthernBobwhite_SimpleDeNovo_contig_360581	gi|358485511|ref|NC_006088.3_GGA1|	77.33	419	65	7	28	417	3229903	3230320	1e-86	324	1	S
NorthernBobwhite_SimpleDeNovo_contig_255152	gi|358485511|ref|NC_006088.3_GGA1|	78.52	419	63	6	1	393	3230320	3229903	1e-93	347	1	S
NorthernBobwhite_SimpleDeNovo_contig_118918	gi|358485511|ref|NC_006088.3_GGA1|	74.31	1055	179	13	1028	2018	3231321	3230295	0	706	2	S
NorthernBobwhite_SimpleDeNovo_contig_118917	gi|358485511|ref|NC_006088.3_GGA1|	80.33	1510	217	22	1	1495	3232257	3233701	0	1357	1	S
NorthernBobwhite_SimpleDeNovo_contig_73386	gi|358485511|ref|NC_006088.3_GGA1|	83.93	224	30	4	49	269	3234590	3234810	2e-58	230	1	S
NorthernBobwhite_SimpleDeNovo_contig_87269	gi|358485511|ref|NC_006088.3_GGA1|	76.89	1177	167	25	1	1108	3236097	3234957	0	879	1	S
NorthernBobwhite_SimpleDeNovo_contig_122013	gi|358485511|ref|NC_006088.3_GGA1|	75.94	2290	317	48	9	2104	3236165	3238414	0	1640	891	M
NorthernBobwhite_SimpleDeNovo_contig_211415	gi|358485511|ref|NC_006088.3_GGA1|	81.77	384	48	4	1	368	3242261	3241884	2e-103	379	1	S
NorthernBobwhite_SimpleDeNovo_contig_176427	gi|358485511|ref|NC_006088.3_GGA1|	82.18	2160	237	35	1	2083	3242368	3244456	0	2136	1	S
NorthernBobwhite_SimpleDeNovo_contig_281672	gi|358485511|ref|NC_006088.3_GGA1|	85.29	34	5	0	279	312	3242404	3242371	0.77	39.2	22	M
NorthernBobwhite_SimpleDeNovo_contig_255734	gi|358485511|ref|NC_006088.3_GGA1|	78.1	1475	199	22	409	1807	3247324	3245898	0	1216	3	S
NorthernBobwhite_SimpleDeNovo_contig_279161	gi|358485511|ref|NC_006088.3_GGA1|	76.81	414	61	5	1	379	3248218	3248631	1e-86	324	1	S
NorthernBobwhite_SimpleDeNovo_contig_279160	gi|358485511|ref|NC_006088.3_GGA1|	76.57	414	62	5	1	379	3248218	3248631	4e-85	318	1	S
NorthernBobwhite_SimpleDeNovo_contig_132344	gi|358485511|ref|NC_006088.3_GGA1|	78.51	4458	623	79	1	4304	3248606	3252882	0	3667	5	S
NorthernBobwhite_SimpleDeNovo_contig_145444	gi|358485511|ref|NC_006088.3_GGA1|	82.26	327	48	4	1	318	3256148	3256473	1e-85	320	1	S
NorthernBobwhite_SimpleDeNovo_contig_244365	gi|358485511|ref|NC_006088.3_GGA1|	82.94	1020	129	13	1	1011	3256448	3257431	0	1038	1	S
NorthernBobwhite_SimpleDeNovo_contig_363372	gi|358485511|ref|NC_006088.3_GGA1|	82.52	326	48	3	1	317	3256473	3256148	2e-87	325	1	S
NorthernBobwhite_SimpleDeNovo_contig_34926	gi|358485511|ref|NC_006088.3_GGA1|	84.14	1721	211	27	1796	3489	3259543	3257858	0	1808	224	M
NorthernBobwhite_SimpleDeNovo_contig_272718	gi|358485511|ref|NC_006088.3_GGA1|	83.71	307	41	4	17	318	3261964	3261662	4e-85	318	1	S
NorthernBobwhite_SimpleDeNovo_contig_203009	gi|358485511|ref|NC_006088.3_GGA1|	83.28	2285	271	31	768	3006	3264462	3262243	0	2360	2	S
NorthernBobwhite_SimpleDeNovo_contig_27401	gi|358485511|ref|NC_006088.3_GGA1|	82.28	2703	322	50	12	2654	3265684	3268289	0	2632	2	S
NorthernBobwhite_SimpleDeNovo_contig_27400	gi|358485511|ref|NC_006088.3_GGA1|	79.28	1829	234	27	1240	2960	3271197	3269406	0	1599	3	S
NorthernBobwhite_SimpleDeNovo_contig_161491	gi|358485511|ref|NC_006088.3_GGA1|	82.65	2248	299	35	6	2190	3272782	3275001	0	2221	1	S
NorthernBobwhite_SimpleDeNovo_contig_57026	gi|358485511|ref|NC_006088.3_GGA1|	83.15	1751	203	21	3	1713	3276829	3275131	0	1817	1	S
NorthernBobwhite_SimpleDeNovo_contig_29599	gi|358485511|ref|NC_006088.3_GGA1|	80.21	3845	501	64	12	3698	3280826	3277084	0	3449	1	S
NorthernBobwhite_SimpleDeNovo_contig_270658	gi|358485511|ref|NC_006088.3_GGA1|	81.86	408	64	5	2	402	3285789	3286193	3e-106	389	1	S
NorthernBobwhite_SimpleDeNovo_contig_54121	gi|358485511|ref|NC_006088.3_GGA1|	84.07	4965	547	60	3	4790	3285811	3280914	0	5337	1	S
NorthernBobwhite_SimpleDeNovo_contig_344816	gi|358485511|ref|NC_006088.3_GGA1|	82.6	408	58	5	2	399	3286193	3285789	4e-111	405	1	S
NorthernBobwhite_SimpleDeNovo_contig_54120	gi|358485511|ref|NC_006088.3_GGA1|	82.99	4497	542	40	1472	5832	3287849	3292258	0	4682	2	S
NorthernBobwhite_SimpleDeNovo_contig_285130	gi|358485511|ref|NC_006088.3_GGA1|	85.54	484	57	4	5	487	3292409	3292880	5e-155	551	1	S
NorthernBobwhite_SimpleDeNovo_contig_267373	gi|358485511|ref|NC_006088.3_GGA1|	85.58	1671	175	11	47	1660	3292907	3294568	0	1938	1	S
NorthernBobwhite_SimpleDeNovo_contig_57529	gi|358485511|ref|NC_006088.3_GGA1|	77.75	1173	184	19	10	1149	3295688	3294560	0	922	1	S
NorthernBobwhite_SimpleDeNovo_contig_42390	gi|358485511|ref|NC_006088.3_GGA1|	84.01	6886	754	82	1	6679	3295803	3302548	0	7398	1	S
NorthernBobwhite_SimpleDeNovo_contig_131385	gi|358485511|ref|NC_006088.3_GGA1|	78.35	1945	287	28	423	2275	3304520	3302618	0	1604	38	M
NorthernBobwhite_SimpleDeNovo_contig_131386	gi|358485511|ref|NC_006088.3_GGA1|	80.87	920	123	13	1	891	3305019	3305914	0	856	1	S
NorthernBobwhite_SimpleDeNovo_contig_176927	gi|358485511|ref|NC_006088.3_GGA1|	83.95	1589	152	20	1	1508	3307551	3305985	0	1719	1	S
NorthernBobwhite_SimpleDeNovo_contig_5924	gi|358485511|ref|NC_006088.3_GGA1|	81.8	6312	809	93	1	6071	3307658	3313870	0	6091	1946	M
NorthernBobwhite_SimpleDeNovo_contig_178316	gi|358485511|ref|NC_006088.3_GGA1|	87.55	1028	108	9	150	1170	3313940	3314954	0	1254	1	S
NorthernBobwhite_SimpleDeNovo_contig_137703	gi|358485511|ref|NC_006088.3_GGA1|	80.14	3273	442	49	490	3618	3318273	3315065	0	2938	2	S
NorthernBobwhite_SimpleDeNovo_contig_332940	gi|358485511|ref|NC_006088.3_GGA1|	78.82	321	63	4	6	325	3320643	3320959	3e-67	259	1	S
NorthernBobwhite_SimpleDeNovo_contig_348410	gi|358485511|ref|NC_006088.3_GGA1|	78.72	390	73	5	4	393	3320959	3320580	1e-85	320	1	S
NorthernBobwhite_SimpleDeNovo_contig_211291	gi|358485511|ref|NC_006088.3_GGA1|	83.3	2006	254	16	1	1945	3323420	3321435	0	2109	2	S
NorthernBobwhite_SimpleDeNovo_contig_32587	gi|358485511|ref|NC_006088.3_GGA1|	86.79	3013	289	25	2764	5717	3326889	3329851	0	3626	3	S
NorthernBobwhite_SimpleDeNovo_contig_259773	gi|358485511|ref|NC_006088.3_GGA1|	87.96	1246	124	7	3	1229	3331096	3329858	0	1563	1	S
NorthernBobwhite_SimpleDeNovo_contig_141309	gi|358485511|ref|NC_006088.3_GGA1|	83.11	894	125	9	478	1352	3333050	3332164	0	915	3	M
NorthernBobwhite_SimpleDeNovo_contig_141308	gi|358485511|ref|NC_006088.3_GGA1|	81.57	1601	207	18	727	2268	3335433	3337004	0	1555	55	M
NorthernBobwhite_SimpleDeNovo_contig_152930	gi|358485511|ref|NC_006088.3_GGA1|	87.65	340	25	4	11	335	3336989	3337326	4e-116	421	1	S
NorthernBobwhite_SimpleDeNovo_contig_344354	gi|358485511|ref|NC_006088.3_GGA1|	87.61	339	26	3	1	324	3337326	3336989	1e-116	423	1	S
NorthernBobwhite_SimpleDeNovo_contig_114057	gi|358485511|ref|NC_006088.3_GGA1|	87.89	1049	108	7	3	1041	3337368	3338407	0	1305	1	S
NorthernBobwhite_SimpleDeNovo_contig_19682	gi|358485511|ref|NC_006088.3_GGA1|	80.89	1915	191	22	1007	2757	3340924	3339021	0	1862	2	S
NorthernBobwhite_SimpleDeNovo_contig_144427	gi|358485511|ref|NC_006088.3_GGA1|	83.23	1491	161	15	1210	2622	3344123	3342644	0	1575	2	S
NorthernBobwhite_SimpleDeNovo_contig_308218	gi|358485511|ref|NC_006088.3_GGA1|	84.89	364	47	4	3	361	3345579	3345939	5e-109	398	1	S
NorthernBobwhite_SimpleDeNovo_contig_37737	gi|358485511|ref|NC_006088.3_GGA1|	85.44	364	42	6	3	358	3345579	3345939	4e-110	401	1	S
NorthernBobwhite_SimpleDeNovo_contig_217728	gi|358485511|ref|NC_006088.3_GGA1|	86.31	884	102	11	523	1395	3347672	3348547	0	1016	2	S
NorthernBobwhite_SimpleDeNovo_contig_138282	gi|358485511|ref|NC_006088.3_GGA1|	83.52	2639	293	27	1341	3872	3349836	3352439	0	2805	2	S
NorthernBobwhite_SimpleDeNovo_contig_216556	gi|358485511|ref|NC_006088.3_GGA1|	82.67	1529	169	14	1	1444	3352816	3354333	0	1586	1	S
NorthernBobwhite_SimpleDeNovo_contig_259643	gi|358485511|ref|NC_006088.3_GGA1|	80.71	451	67	3	1	439	3356007	3356449	2e-117	426	1	S
NorthernBobwhite_SimpleDeNovo_contig_10449	gi|358485511|ref|NC_006088.3_GGA1|	83.89	1688	196	12	16	1697	3356017	3354400	0	1833	1	S
NorthernBobwhite_SimpleDeNovo_contig_240190	gi|358485511|ref|NC_006088.3_GGA1|	84.23	945	96	5	318	1234	3357354	3356435	0	1058	96	M
NorthernBobwhite_SimpleDeNovo_contig_10448	gi|358485511|ref|NC_006088.3_GGA1|	86.55	3027	347	17	769	3775	3358125	3361111	0	3602	2	S
NorthernBobwhite_SimpleDeNovo_contig_28589	gi|358485511|ref|NC_006088.3_GGA1|	84.88	913	101	7	30	908	3361296	3362205	0	1027	1	S
NorthernBobwhite_SimpleDeNovo_contig_304596	gi|358485511|ref|NC_006088.3_GGA1|	88.59	333	38	0	1	333	3362180	3362512	8e-119	430	1	S
NorthernBobwhite_SimpleDeNovo_contig_304726	gi|358485511|ref|NC_006088.3_GGA1|	88.89	333	37	0	1	333	3362512	3362180	7e-120	434	1	S
NorthernBobwhite_SimpleDeNovo_contig_22180	gi|358485511|ref|NC_006088.3_GGA1|	82.8	2448	287	26	408	2755	3362558	3364971	0	2520	1	S
NorthernBobwhite_SimpleDeNovo_contig_223492	gi|358485511|ref|NC_006088.3_GGA1|	86.49	1569	154	12	414	1929	3365402	3366965	0	1873	1	S
NorthernBobwhite_SimpleDeNovo_contig_231524	gi|358485511|ref|NC_006088.3_GGA1|	87.07	2884	250	20	2	2809	3371258	3368422	0	3541	1	S
NorthernBobwhite_SimpleDeNovo_contig_122862	gi|358485511|ref|NC_006088.3_GGA1|	86.25	2037	219	17	3067	5067	3371831	3373842	0	2390	523	M
NorthernBobwhite_SimpleDeNovo_contig_364926	gi|358485511|ref|NC_006088.3_GGA1|	80.39	51	9	1	126	175	3375578	3375528	0.011	44.6	20	M
NorthernBobwhite_SimpleDeNovo_contig_161630	gi|358485511|ref|NC_006088.3_GGA1|	84.53	362	36	5	315	667	3376205	3376555	4e-108	396	1	S
NorthernBobwhite_SimpleDeNovo_contig_28737	gi|358485511|ref|NC_006088.3_GGA1|	87.19	7083	714	49	1	6959	3383892	3376879	0	8637	477	M
NorthernBobwhite_SimpleDeNovo_contig_130039	gi|358485511|ref|NC_006088.3_GGA1|	84.19	1107	142	7	1	1098	3384994	3383912	0	1205	2	M
NorthernBobwhite_SimpleDeNovo_contig_284403	gi|358485511|ref|NC_006088.3_GGA1|	83.52	449	57	5	1	435	3385584	3385139	1e-130	470	1	S
NorthernBobwhite_SimpleDeNovo_contig_6657	gi|358485511|ref|NC_006088.3_GGA1|	84.18	2997	329	26	5	2908	3389880	3386936	0	3281	2313	M
NorthernBobwhite_SimpleDeNovo_contig_296018	gi|358485511|ref|NC_006088.3_GGA1|	86.76	627	71	2	1	617	3390791	3390167	0	758	1	S
NorthernBobwhite_SimpleDeNovo_contig_246345	gi|358485511|ref|NC_006088.3_GGA1|	86.13	4087	430	33	21	4071	3394892	3390907	0	4789	1	S
NorthernBobwhite_SimpleDeNovo_contig_281893	gi|358485511|ref|NC_006088.3_GGA1|	88.24	391	39	4	6	390	3395297	3394908	2e-135	486	1	S
NorthernBobwhite_SimpleDeNovo_contig_194404	gi|358485511|ref|NC_006088.3_GGA1|	80.5	400	49	4	1	371	3396036	3395637	5e-103	378	1	S
NorthernBobwhite_SimpleDeNovo_contig_241034	gi|358485511|ref|NC_006088.3_GGA1|	88.25	315	28	4	4	314	3396080	3396389	2e-107	392	1	S
NorthernBobwhite_SimpleDeNovo_contig_309409	gi|358485511|ref|NC_006088.3_GGA1|	87.25	306	30	4	1	302	3396389	3396089	7e-100	367	1	S
NorthernBobwhite_SimpleDeNovo_contig_23889	gi|358485511|ref|NC_006088.3_GGA1|	84.4	8863	1017	86	3591	12196	3399503	3408256	0	9690	558	M
NorthernBobwhite_SimpleDeNovo_contig_103539	gi|358485511|ref|NC_006088.3_GGA1|	90.93	1180	92	5	11	1176	3408922	3410100	0	1636	3	S
NorthernBobwhite_SimpleDeNovo_contig_78330	gi|358485511|ref|NC_006088.3_GGA1|	76.58	3066	449	57	3393	6256	3414582	3411584	0	2278	6	S
NorthernBobwhite_SimpleDeNovo_contig_369814	gi|358485511|ref|NC_006088.3_GGA1|	79.77	435	71	7	28	452	3417356	3417783	3e-101	372	1	S
NorthernBobwhite_SimpleDeNovo_contig_342813	gi|358485511|ref|NC_006088.3_GGA1|	82.8	378	54	4	37	404	3417731	3417355	5e-104	381	1	S
NorthernBobwhite_SimpleDeNovo_contig_91513	gi|358485511|ref|NC_006088.3_GGA1|	83.1	11243	1179	148	123	10932	3417837	3428791	0	11690	1	S
NorthernBobwhite_SimpleDeNovo_contig_45492	gi|358485511|ref|NC_006088.3_GGA1|	79.76	840	99	13	1084	1869	3429912	3429090	0	755	3	S
NorthernBobwhite_SimpleDeNovo_contig_60010	gi|358485511|ref|NC_006088.3_GGA1|	80.69	751	90	7	3	699	3431966	3431217	0	719	1	S
NorthernBobwhite_SimpleDeNovo_contig_224959	gi|358485511|ref|NC_006088.3_GGA1|	85.78	640	51	9	1	618	3432015	3432636	0	740	1	S
NorthernBobwhite_SimpleDeNovo_contig_60011	gi|358485511|ref|NC_006088.3_GGA1|	85.53	2226	214	19	687	2873	3434255	3436411	0	2574	3	S
NorthernBobwhite_SimpleDeNovo_contig_89080	gi|358485511|ref|NC_006088.3_GGA1|	84.49	1077	124	10	1	1050	3437751	3438811	0	1184	1	S
NorthernBobwhite_SimpleDeNovo_contig_312756	gi|358485511|ref|NC_006088.3_GGA1|	83.33	48	6	2	366	412	3438205	3438251	0.021	44.6	34	M
NorthernBobwhite_SimpleDeNovo_contig_69402	gi|358485511|ref|NC_006088.3_GGA1|	84.61	1995	192	19	1	1892	3441255	3439273	0	2232	1	S
NorthernBobwhite_SimpleDeNovo_contig_55592	gi|358485511|ref|NC_006088.3_GGA1|	85.02	2938	302	32	8	2846	3444239	3441341	0	3296	2	S
NorthernBobwhite_SimpleDeNovo_contig_76144	gi|358485511|ref|NC_006088.3_GGA1|	85.03	2852	339	21	1	2807	3445056	3447864	0	3220	1	S
NorthernBobwhite_SimpleDeNovo_contig_256023	gi|358485511|ref|NC_006088.3_GGA1|	87.97	349	41	1	1	349	3447844	3448191	6e-121	437	1	S
NorthernBobwhite_SimpleDeNovo_contig_215864	gi|358485511|ref|NC_006088.3_GGA1|	88.25	349	40	1	1	349	3448191	3447844	5e-122	441	1	S
NorthernBobwhite_SimpleDeNovo_contig_67719	gi|358485511|ref|NC_006088.3_GGA1|	87.34	2835	255	26	1	2781	3451520	3448736	0	3470	2	S
NorthernBobwhite_SimpleDeNovo_contig_154948	gi|358485511|ref|NC_006088.3_GGA1|	84.5	2264	257	28	588	2788	3452572	3454804	0	2459	3	S
NorthernBobwhite_SimpleDeNovo_contig_257893	gi|358485511|ref|NC_006088.3_GGA1|	77.78	63	10	2	267	329	3454859	3454917	0.003	46.4	486	M
NorthernBobwhite_SimpleDeNovo_contig_10404	gi|358485511|ref|NC_006088.3_GGA1|	75.71	1630	200	44	5	1529	3456104	3457642	0	1133	3	S
NorthernBobwhite_SimpleDeNovo_contig_229283	gi|358485511|ref|NC_006088.3_GGA1|	84.35	556	60	8	1	554	3459701	3460231	1e-169	600	1	S
NorthernBobwhite_SimpleDeNovo_contig_313128	gi|358485511|ref|NC_006088.3_GGA1|	81.38	349	51	4	1	349	3459701	3459367	6e-89	331	29	M
NorthernBobwhite_SimpleDeNovo_contig_74556	gi|358485511|ref|NC_006088.3_GGA1|	84.46	1654	205	11	3	1621	3461233	3462869	0	1822	1	S
NorthernBobwhite_SimpleDeNovo_contig_75469	gi|358485511|ref|NC_006088.3_GGA1|	85	4728	471	53	74	4707	3463000	3467583	0	5306	2	S
NorthernBobwhite_SimpleDeNovo_contig_163161	gi|358485511|ref|NC_006088.3_GGA1|	85.51	138	20	0	628	765	3468499	3468362	5e-37	159	4	M
NorthernBobwhite_SimpleDeNovo_contig_152294	gi|358485511|ref|NC_006088.3_GGA1|	85.84	3290	335	48	11	3227	3472621	3469390	0	3734	14	M
NorthernBobwhite_SimpleDeNovo_contig_104058	gi|358485511|ref|NC_006088.3_GGA1|	80.72	4456	520	75	1	4297	3472639	3476914	0	4131	1	S
NorthernBobwhite_SimpleDeNovo_contig_372405	gi|358485511|ref|NC_006088.3_GGA1|	92.86	28	2	0	126	153	3476991	3476964	0.052	42.8	22	M
NorthernBobwhite_SimpleDeNovo_contig_349095	gi|358485511|ref|NC_006088.3_GGA1|	82.3	322	36	5	1	316	3477043	3477349	1e-85	320	1	S
NorthernBobwhite_SimpleDeNovo_contig_284099	gi|358485511|ref|NC_006088.3_GGA1|	69.66	89	26	1	338	426	3480356	3480269	8.2	35.6	1	S
NorthernBobwhite_SimpleDeNovo_contig_53258	gi|358485511|ref|NC_006088.3_GGA1|	86.43	6502	679	48	9309	15674	3489857	3483423	0	7716	491	M
NorthernBobwhite_SimpleDeNovo_contig_162784	gi|358485511|ref|NC_006088.3_GGA1|	84.44	3637	372	34	180	3711	3505025	3501478	0	4030	6	M
NorthernBobwhite_SimpleDeNovo_contig_81525	gi|358485511|ref|NC_006088.3_GGA1|	84.99	4703	459	40	716	5268	3514035	3509430	0	5341	4	S
NorthernBobwhite_SimpleDeNovo_contig_151126	gi|358485511|ref|NC_006088.3_GGA1|	86.9	1282	137	12	884	2159	3516117	3517373	0	1528	2	S
NorthernBobwhite_SimpleDeNovo_contig_29405	gi|358485511|ref|NC_006088.3_GGA1|	84.96	1602	191	14	12	1606	3519501	3517943	0	1784	2	S
NorthernBobwhite_SimpleDeNovo_contig_340680	gi|358485511|ref|NC_006088.3_GGA1|	90.21	337	31	2	55	391	3519604	3519938	3e-125	452	6	M
NorthernBobwhite_SimpleDeNovo_contig_352478	gi|358485511|ref|NC_006088.3_GGA1|	89.35	310	32	1	1	310	3519630	3519938	9e-112	407	1	S
NorthernBobwhite_SimpleDeNovo_contig_147265	gi|358485511|ref|NC_006088.3_GGA1|	85.42	1413	157	10	1	1387	3521303	3519914	0	1618	1572	M
NorthernBobwhite_SimpleDeNovo_contig_233894	gi|358485511|ref|NC_006088.3_GGA1|	87.78	1555	154	9	1	1536	3521429	3522966	0	1939	1	S
NorthernBobwhite_SimpleDeNovo_contig_205905	gi|358485511|ref|NC_006088.3_GGA1|	85.86	2030	221	14	1	1977	3524500	3526516	0	2363	1	S
NorthernBobwhite_SimpleDeNovo_contig_205906	gi|358485511|ref|NC_006088.3_GGA1|	83.08	928	112	9	1	917	3524525	3523632	0	966	1	S
NorthernBobwhite_SimpleDeNovo_contig_304372	gi|358485511|ref|NC_006088.3_GGA1|	81.69	437	43	3	1	436	3524525	3524125	4e-124	448	1	S
NorthernBobwhite_SimpleDeNovo_contig_166033	gi|358485511|ref|NC_006088.3_GGA1|	87.61	2252	201	17	2022	4226	3528904	3526684	0	2798	131	M
NorthernBobwhite_SimpleDeNovo_contig_172617	gi|358485511|ref|NC_006088.3_GGA1|	85.54	1397	159	11	1721	3100	3533484	3534854	0	1599	4	M
NorthernBobwhite_SimpleDeNovo_contig_222378	gi|358485511|ref|NC_006088.3_GGA1|	84.53	4442	511	35	1	4346	3535505	3539866	0	4915	854	M
NorthernBobwhite_SimpleDeNovo_contig_255308	gi|358485511|ref|NC_006088.3_GGA1|	74.73	467	93	9	1	448	3539781	3540241	2e-77	293	177	M
NorthernBobwhite_SimpleDeNovo_contig_255307	gi|358485511|ref|NC_006088.3_GGA1|	74.57	464	94	8	1	445	3539783	3540241	7e-77	291	141	M
NorthernBobwhite_SimpleDeNovo_contig_167196	gi|358485511|ref|NC_006088.3_GGA1|	79.42	685	125	2	1235	1904	3539787	3540470	1e-170	605	2554	M
NorthernBobwhite_SimpleDeNovo_contig_286614	gi|358485511|ref|NC_006088.3_GGA1|	74.51	459	74	9	72	490	3539935	3540390	4e-81	306	356	M
NorthernBobwhite_SimpleDeNovo_contig_63609	gi|358485511|ref|NC_006088.3_GGA1|	81.12	498	87	5	1	495	3539953	3540446	1e-131	473	713	M
NorthernBobwhite_SimpleDeNovo_contig_86284	gi|358485511|ref|NC_006088.3_GGA1|	85.04	568	83	1	9	576	3540005	3540570	0	639	3482	M
NorthernBobwhite_SimpleDeNovo_contig_291218	gi|358485511|ref|NC_006088.3_GGA1|	79.88	512	91	1	125	624	3540093	3540604	2e-129	466	2135	M
NorthernBobwhite_SimpleDeNovo_contig_345709	gi|358485511|ref|NC_006088.3_GGA1|	75.33	454	88	5	5	434	3540108	3540561	2e-83	313	536	M
NorthernBobwhite_SimpleDeNovo_contig_168351	gi|358485511|ref|NC_006088.3_GGA1|	83.5	406	63	2	1	406	3540111	3540512	7e-117	425	1854	M
NorthernBobwhite_SimpleDeNovo_contig_266699	gi|358485511|ref|NC_006088.3_GGA1|	74.93	363	76	7	13	368	3540241	3539887	2e-57	226	13	M
NorthernBobwhite_SimpleDeNovo_contig_137262	gi|358485511|ref|NC_006088.3_GGA1|	76.2	664	134	9	6	654	3540479	3539825	3e-129	466	1253	M
NorthernBobwhite_SimpleDeNovo_contig_101704	gi|358485511|ref|NC_006088.3_GGA1|	77.78	792	136	9	4	760	3540515	3539729	3e-180	636	2123	M
NorthernBobwhite_SimpleDeNovo_contig_161650	gi|358485511|ref|NC_006088.3_GGA1|	80.49	369	61	2	3	360	3540558	3540190	4e-92	342	1289	M
NorthernBobwhite_SimpleDeNovo_contig_21618	gi|358485511|ref|NC_006088.3_GGA1|	90.07	141	14	0	44	184	3540839	3540979	4e-47	192	13325	M
NorthernBobwhite_SimpleDeNovo_contig_194626	gi|358485511|ref|NC_006088.3_GGA1|	78.22	808	130	6	1	764	3540981	3540176	0	679	2511	M
NorthernBobwhite_SimpleDeNovo_contig_152700	gi|358485511|ref|NC_006088.3_GGA1|	81.37	1712	194	15	693	2321	3545088	3543419	0	1694	2599	M
NorthernBobwhite_SimpleDeNovo_contig_152701	gi|358485511|ref|NC_006088.3_GGA1|	83.21	2466	268	26	274	2662	3545093	3547489	0	2617	1	S
NorthernBobwhite_SimpleDeNovo_contig_201377	gi|358485511|ref|NC_006088.3_GGA1|	85.65	2181	246	12	2	2142	3547594	3549747	0	2535	32	M
NorthernBobwhite_SimpleDeNovo_contig_169911	gi|358485511|ref|NC_006088.3_GGA1|	86.58	1468	132	16	16	1424	3551962	3550501	0	1746	1	S
NorthernBobwhite_SimpleDeNovo_contig_169910	gi|358485511|ref|NC_006088.3_GGA1|	84.09	3149	339	30	83	3146	3552107	3555178	0	3431	22	M
NorthernBobwhite_SimpleDeNovo_contig_151656	gi|358485511|ref|NC_006088.3_GGA1|	87.9	124	15	0	310	433	3555892	3555769	4e-36	156	655	M
NorthernBobwhite_SimpleDeNovo_contig_346137	gi|358485511|ref|NC_006088.3_GGA1|	87.9	124	15	0	296	419	3555892	3555769	3e-36	156	357	M
NorthernBobwhite_SimpleDeNovo_contig_241288	gi|358485511|ref|NC_006088.3_GGA1|	83.73	762	103	5	32	787	3561462	3562208	0	812	4	S
NorthernBobwhite_SimpleDeNovo_contig_238760	gi|358485511|ref|NC_006088.3_GGA1|	89.16	83	7	1	308	388	3564288	3564370	1e-21	107	1	S
NorthernBobwhite_SimpleDeNovo_contig_238761	gi|358485511|ref|NC_006088.3_GGA1|	86.64	756	88	5	396	1150	3565223	3564480	0	897	1	S
NorthernBobwhite_SimpleDeNovo_contig_307531	gi|358485511|ref|NC_006088.3_GGA1|	82.49	417	63	5	149	557	3565229	3565643	1e-112	410	2663	M
NorthernBobwhite_SimpleDeNovo_contig_162031	gi|358485511|ref|NC_006088.3_GGA1|	86.06	4526	493	34	1	4432	3565618	3570099	0	5303	712	M
NorthernBobwhite_SimpleDeNovo_contig_285307	gi|358485511|ref|NC_006088.3_GGA1|	82.65	415	62	5	3	410	3565640	3565229	1e-112	410	2317	M
NorthernBobwhite_SimpleDeNovo_contig_318913	gi|358485511|ref|NC_006088.3_GGA1|	76.11	339	49	3	1	307	3570074	3570412	2e-68	262	1	S
NorthernBobwhite_SimpleDeNovo_contig_313085	gi|358485511|ref|NC_006088.3_GGA1|	74.35	538	78	8	6	488	3570606	3570074	1e-99	367	1	S
NorthernBobwhite_SimpleDeNovo_contig_6972	gi|358485511|ref|NC_006088.3_GGA1|	85.94	1863	217	13	34	1858	3580099	3578244	0	2161	3	S
NorthernBobwhite_SimpleDeNovo_contig_314558	gi|358485511|ref|NC_006088.3_GGA1|	83.17	808	97	11	165	948	3580896	3580104	0	830	13	M
NorthernBobwhite_SimpleDeNovo_contig_201818	gi|358485511|ref|NC_006088.3_GGA1|	82.94	1694	180	23	1	1626	3581017	3582669	0	1746	1	S
NorthernBobwhite_SimpleDeNovo_contig_27977	gi|358485511|ref|NC_006088.3_GGA1|	86.9	2633	261	20	2844	5445	3586057	3588636	0	3178	3	S
NorthernBobwhite_SimpleDeNovo_contig_16380	gi|358485511|ref|NC_006088.3_GGA1|	85.9	8742	946	83	9	8579	3588695	3597320	0	10090	5486	M
NorthernBobwhite_SimpleDeNovo_contig_72598	gi|358485511|ref|NC_006088.3_GGA1|	80.56	288	56	0	403	690	3590993	3590706	3e-69	268	162	M
NorthernBobwhite_SimpleDeNovo_contig_302122	gi|358485511|ref|NC_006088.3_GGA1|	91.4	93	6	1	1	91	3597681	3597773	4e-28	129	1642	M
NorthernBobwhite_SimpleDeNovo_contig_229767	gi|358485511|ref|NC_006088.3_GGA1|	90.48	126	12	0	2	127	3597787	3597662	1e-41	174	4856	M
NorthernBobwhite_SimpleDeNovo_contig_273547	gi|358485511|ref|NC_006088.3_GGA1|	86.96	184	24	0	180	363	3597825	3597642	7e-57	224	16	M
NorthernBobwhite_SimpleDeNovo_contig_106622	gi|358485511|ref|NC_006088.3_GGA1|	86.17	1323	160	8	27	1341	3601933	3600626	0	1546	1	S
NorthernBobwhite_SimpleDeNovo_contig_174323	gi|358485511|ref|NC_006088.3_GGA1|	80.35	341	52	6	1	337	3602498	3602169	1e-79	300	1	S
NorthernBobwhite_SimpleDeNovo_contig_188852	gi|358485511|ref|NC_006088.3_GGA1|	84.24	1193	145	9	660	1830	3603818	3602647	0	1303	2	S
NorthernBobwhite_SimpleDeNovo_contig_18816	gi|358485511|ref|NC_006088.3_GGA1|	83.29	1652	221	20	2321	3928	3606015	3607655	0	1694	230	M
NorthernBobwhite_SimpleDeNovo_contig_271395	gi|358485511|ref|NC_006088.3_GGA1|	82.22	180	31	1	156	334	3608055	3607876	1e-42	178	8035	M
NorthernBobwhite_SimpleDeNovo_contig_23909	gi|358485511|ref|NC_006088.3_GGA1|	84.67	2094	220	18	564	2601	3612157	3610109	0	2340	4	S
NorthernBobwhite_SimpleDeNovo_contig_23908	gi|358485511|ref|NC_006088.3_GGA1|	78.65	1227	147	15	9	1127	3613134	3614353	0	1068	1	S
NorthernBobwhite_SimpleDeNovo_contig_264786	gi|358485511|ref|NC_006088.3_GGA1|	88.89	36	3	1	1234	1269	3615913	3615879	0.055	44.6	23	M
NorthernBobwhite_SimpleDeNovo_contig_198383	gi|358485511|ref|NC_006088.3_GGA1|	91.57	534	31	3	800	1333	3616298	3616817	0	760	3	S
NorthernBobwhite_SimpleDeNovo_contig_215660	gi|358485511|ref|NC_006088.3_GGA1|	81.74	586	79	7	1	560	3617563	3616980	2e-160	569	1	S
NorthernBobwhite_SimpleDeNovo_contig_230479	gi|358485511|ref|NC_006088.3_GGA1|	80.85	731	89	9	214	896	3619161	3618434	0	693	1030	M
NorthernBobwhite_SimpleDeNovo_contig_230478	gi|358485511|ref|NC_006088.3_GGA1|	84.42	321	30	2	1	304	3621593	3621276	9e-99	363	1	S
NorthernBobwhite_SimpleDeNovo_contig_11731	gi|358485511|ref|NC_006088.3_GGA1|	86.07	1464	156	15	1	1433	3623014	3621568	0	1696	1	S
NorthernBobwhite_SimpleDeNovo_contig_298549	gi|358485511|ref|NC_006088.3_GGA1|	83.83	1750	207	13	13	1699	3623531	3625267	0	1891	326	M
NorthernBobwhite_SimpleDeNovo_contig_164051	gi|358485511|ref|NC_006088.3_GGA1|	85.05	107	16	0	101	207	3633823	3633929	1e-25	122	2625	M
NorthernBobwhite_SimpleDeNovo_contig_212075	gi|358485511|ref|NC_006088.3_GGA1|	82.42	694	78	8	2	654	3634191	3634881	0	706	1	S
NorthernBobwhite_SimpleDeNovo_contig_79822	gi|358485511|ref|NC_006088.3_GGA1|	83.56	1594	170	16	1	1550	3634215	3632670	0	1705	12	M
NorthernBobwhite_SimpleDeNovo_contig_294180	gi|358485511|ref|NC_006088.3_GGA1|	80.72	612	74	8	1	571	3634799	3634191	2e-162	576	1	S
NorthernBobwhite_SimpleDeNovo_contig_79823	gi|358485511|ref|NC_006088.3_GGA1|	83.17	5513	675	58	1	5389	3635029	3640412	0	5725	1	S
NorthernBobwhite_SimpleDeNovo_contig_101868	gi|358485511|ref|NC_006088.3_GGA1|	81.83	3544	499	36	1	3466	3643963	3640487	0	3456	8	M
NorthernBobwhite_SimpleDeNovo_contig_189049	gi|358485511|ref|NC_006088.3_GGA1|	79	419	72	4	22	426	3644480	3644064	2e-96	356	1	S
NorthernBobwhite_SimpleDeNovo_contig_23136	gi|358485511|ref|NC_006088.3_GGA1|	82.67	2106	274	21	4469	6499	3646605	3644516	0	2140	77	M
NorthernBobwhite_SimpleDeNovo_contig_1810	gi|358485511|ref|NC_006088.3_GGA1|	84.91	232	30	2	1	227	3653302	3653533	1e-66	257	4	M
NorthernBobwhite_SimpleDeNovo_contig_55055	gi|358485511|ref|NC_006088.3_GGA1|	86.11	1152	120	9	1	1128	3654666	3653531	0	1352	1	S
NorthernBobwhite_SimpleDeNovo_contig_150371	gi|358485511|ref|NC_006088.3_GGA1|	86.43	973	104	5	1	958	3656166	3655207	0	1162	4	M
NorthernBobwhite_SimpleDeNovo_contig_198686	gi|358485511|ref|NC_006088.3_GGA1|	85.44	879	103	8	1	861	3656225	3657096	0	994	2	M
NorthernBobwhite_SimpleDeNovo_contig_102952	gi|358485511|ref|NC_006088.3_GGA1|	88.17	803	79	7	1	791	3658715	3657917	0	1003	2	S
NorthernBobwhite_SimpleDeNovo_contig_301525	gi|358485511|ref|NC_006088.3_GGA1|	84.94	538	68	4	1	531	3659158	3658627	1e-169	600	1	S
NorthernBobwhite_SimpleDeNovo_contig_163338	gi|358485511|ref|NC_006088.3_GGA1|	82.93	955	127	11	1	920	3660446	3659493	0	982	5344	M
NorthernBobwhite_SimpleDeNovo_contig_186763	gi|358485511|ref|NC_006088.3_GGA1|	85.35	3461	349	30	183	3566	3663963	3660584	0	3970	644	M
NorthernBobwhite_SimpleDeNovo_contig_283664	gi|358485511|ref|NC_006088.3_GGA1|	84.25	381	49	1	106	486	3664330	3663961	2e-116	423	1	S
NorthernBobwhite_SimpleDeNovo_contig_155470	gi|358485511|ref|NC_006088.3_GGA1|	86.96	782	75	6	1	758	3665362	3664584	0	948	1	S
NorthernBobwhite_SimpleDeNovo_contig_96364	gi|358485511|ref|NC_006088.3_GGA1|	84.36	5146	629	46	5016	10032	3671974	3677072	0	5602	50	M
NorthernBobwhite_SimpleDeNovo_contig_131404	gi|358485511|ref|NC_006088.3_GGA1|	76.67	60	14	0	205	264	3675886	3675827	0.003	46.4	65	M
NorthernBobwhite_SimpleDeNovo_contig_2216	gi|358485511|ref|NC_006088.3_GGA1|	85.67	4593	543	40	11854	16382	3684954	3680413	0	5240	6057	M
NorthernBobwhite_SimpleDeNovo_contig_87942	gi|358485511|ref|NC_006088.3_GGA1|	85.54	3666	406	23	136	3699	3698633	3702276	0	4230	3493	M
NorthernBobwhite_SimpleDeNovo_contig_123884	gi|358485511|ref|NC_006088.3_GGA1|	87.68	1185	122	5	179	1342	3711752	3710571	0	1478	2	S
NorthernBobwhite_SimpleDeNovo_contig_60684	gi|358485511|ref|NC_006088.3_GGA1|	85.51	4225	445	43	1332	5455	3719812	3715654	0	4818	855	M
NorthernBobwhite_SimpleDeNovo_contig_348952	gi|358485511|ref|NC_006088.3_GGA1|	96.43	28	1	0	315	342	3725847	3725874	0.004	46.4	21	M
NorthernBobwhite_SimpleDeNovo_contig_59593	gi|358485511|ref|NC_006088.3_GGA1|	85.45	4818	523	38	6	4721	3726472	3721731	0	5517	1	S
NorthernBobwhite_SimpleDeNovo_contig_201555	gi|358485511|ref|NC_006088.3_GGA1|	88.61	553	63	0	1	553	3727079	3726527	0	713	1	S
NorthernBobwhite_SimpleDeNovo_contig_352706	gi|358485511|ref|NC_006088.3_GGA1|	94.25	313	15	1	2	314	3727390	3727081	1e-134	482	1	S
NorthernBobwhite_SimpleDeNovo_contig_303029	gi|358485511|ref|NC_006088.3_GGA1|	80.53	113	17	4	14	121	3729028	3729140	1e-16	91.5	1	S
NorthernBobwhite_SimpleDeNovo_contig_212341	gi|358485511|ref|NC_006088.3_GGA1|	86.63	516	49	6	1	509	3729893	3729391	7e-173	610	1	S
NorthernBobwhite_SimpleDeNovo_contig_178645	gi|358485511|ref|NC_006088.3_GGA1|	83.5	3533	354	29	3	3338	3730473	3733973	0	3819	1	S
NorthernBobwhite_SimpleDeNovo_contig_242683	gi|358485511|ref|NC_006088.3_GGA1|	93.68	443	25	2	2	442	3730488	3730047	0	666	1	S
NorthernBobwhite_SimpleDeNovo_contig_363545	gi|358485511|ref|NC_006088.3_GGA1|	82.49	337	37	4	2	326	3734777	3734451	9e-93	343	1	S
NorthernBobwhite_SimpleDeNovo_contig_189317	gi|358485511|ref|NC_006088.3_GGA1|	89.41	1851	160	13	1244	3075	3736779	3734946	0	2428	3	M
NorthernBobwhite_SimpleDeNovo_contig_201369	gi|358485511|ref|NC_006088.3_GGA1|	84.48	1940	181	21	1328	3198	3739952	3741840	0	2156	3	S
NorthernBobwhite_SimpleDeNovo_contig_177307	gi|358485511|ref|NC_006088.3_GGA1|	83.69	331	49	2	1	328	3744516	3744188	3e-94	349	1	S
NorthernBobwhite_SimpleDeNovo_contig_251263	gi|358485511|ref|NC_006088.3_GGA1|	89.01	1219	106	9	1	1197	3744572	3745784	0	1579	1	S
NorthernBobwhite_SimpleDeNovo_contig_67195	gi|358485511|ref|NC_006088.3_GGA1|	83.64	2207	258	29	674	2807	3747964	3745788	0	2315	2	S
NorthernBobwhite_SimpleDeNovo_contig_1389	gi|358485511|ref|NC_006088.3_GGA1|	84.63	3136	323	31	1305	4355	3750040	3753101	0	3499	5216	M
NorthernBobwhite_SimpleDeNovo_contig_150814	gi|358485511|ref|NC_006088.3_GGA1|	84.24	5597	623	45	621	6131	3755549	3760972	0	6148	1692	M
NorthernBobwhite_SimpleDeNovo_contig_227969	gi|358485511|ref|NC_006088.3_GGA1|	87.78	1767	170	12	1	1741	3762500	3764246	0	2201	1	S
NorthernBobwhite_SimpleDeNovo_contig_96449	gi|358485511|ref|NC_006088.3_GGA1|	86.78	1846	174	17	3113	4907	3766470	3764644	0	2215	2	S
NorthernBobwhite_SimpleDeNovo_contig_245970	gi|358485511|ref|NC_006088.3_GGA1|	71.68	784	162	21	2	761	3769407	3768660	5e-101	372	618	M
NorthernBobwhite_SimpleDeNovo_contig_91924	gi|358485511|ref|NC_006088.3_GGA1|	78.81	604	112	5	929	1530	3774354	3774943	3e-140	504	3	S
NorthernBobwhite_SimpleDeNovo_contig_20716	gi|358485511|ref|NC_006088.3_GGA1|	75.71	704	105	9	533	1174	3777093	3777792	1e-144	518	25	M
NorthernBobwhite_SimpleDeNovo_contig_99757	gi|358485511|ref|NC_006088.3_GGA1|	75.41	488	108	7	1	482	3778926	3779407	6e-85	318	1	S
NorthernBobwhite_SimpleDeNovo_contig_7400	gi|358485511|ref|NC_006088.3_GGA1|	84.04	376	46	6	392	757	3782881	3783252	1e-107	394	2	S
NorthernBobwhite_SimpleDeNovo_contig_213166	gi|358485511|ref|NC_006088.3_GGA1|	82.23	197	26	3	157	353	3782881	3783068	4e-47	192	2	S
NorthernBobwhite_SimpleDeNovo_contig_134929	gi|358485511|ref|NC_006088.3_GGA1|	82.1	1961	264	16	272	2157	3786960	3785012	0	1961	1	S
NorthernBobwhite_SimpleDeNovo_contig_23154	gi|358485511|ref|NC_006088.3_GGA1|	85.95	3510	344	29	2438	5863	3795912	3792468	0	4111	7102	M
NorthernBobwhite_SimpleDeNovo_contig_165138	gi|358485511|ref|NC_006088.3_GGA1|	82.77	296	50	1	5	299	3798148	3797853	9e-80	300	1	S
NorthernBobwhite_SimpleDeNovo_contig_62142	gi|358485511|ref|NC_006088.3_GGA1|	85.5	869	92	7	576	1419	3798402	3799261	0	998	5	M
NorthernBobwhite_SimpleDeNovo_contig_73809	gi|358485511|ref|NC_006088.3_GGA1|	85.87	1790	194	15	3571	5312	3802111	3800333	0	2073	7102	M
NorthernBobwhite_SimpleDeNovo_contig_59691	gi|358485511|ref|NC_006088.3_GGA1|	86.71	1716	188	13	5	1689	3806199	3807905	0	2053	2	S
NorthernBobwhite_SimpleDeNovo_contig_42523	gi|358485511|ref|NC_006088.3_GGA1|	84.09	1257	145	10	8	1229	3810972	3809736	0	1370	2	S
NorthernBobwhite_SimpleDeNovo_contig_42522	gi|358485511|ref|NC_006088.3_GGA1|	85.43	2808	285	33	3166	5899	3813148	3815905	0	3184	4	M
NorthernBobwhite_SimpleDeNovo_contig_210006	gi|358485511|ref|NC_006088.3_GGA1|	74.44	90	17	2	5961	6044	3818046	3818135	0.0003	55.4	153	M
NorthernBobwhite_SimpleDeNovo_contig_260215	gi|358485511|ref|NC_006088.3_GGA1|	83.33	54	7	1	724	775	3818050	3818103	0.0001	55.4	74	M
NorthernBobwhite_SimpleDeNovo_contig_368611	gi|358485511|ref|NC_006088.3_GGA1|	87.18	39	5	0	156	194	3818071	3818109	0.001	48.2	325	M
NorthernBobwhite_SimpleDeNovo_contig_371387	gi|358485511|ref|NC_006088.3_GGA1|	93.1	29	2	0	339	367	3818080	3818052	0.014	44.6	242	M
NorthernBobwhite_SimpleDeNovo_contig_351278	gi|358485511|ref|NC_006088.3_GGA1|	83.67	49	8	0	1095	1143	3818094	3818046	9e-05	53.6	66	M
NorthernBobwhite_SimpleDeNovo_contig_293576	gi|358485511|ref|NC_006088.3_GGA1|	75	92	20	2	315	405	3818136	3818047	5e-06	57.2	62	M
NorthernBobwhite_SimpleDeNovo_contig_24571	gi|358485511|ref|NC_006088.3_GGA1|	84.64	1934	193	27	1	1858	3819413	3817508	0	2122	2	S
NorthernBobwhite_SimpleDeNovo_contig_24570	gi|358485511|ref|NC_006088.3_GGA1|	83.89	1850	209	23	1	1775	3819417	3821252	0	1970	3	M
NorthernBobwhite_SimpleDeNovo_contig_217461	gi|358485511|ref|NC_006088.3_GGA1|	83.34	1915	260	17	1	1882	3825031	3823143	0	1992	1	S
NorthernBobwhite_SimpleDeNovo_contig_275826	gi|358485511|ref|NC_006088.3_GGA1|	83.26	478	58	8	1	462	3826020	3825549	2e-135	486	1	S
NorthernBobwhite_SimpleDeNovo_contig_275827	gi|358485511|ref|NC_006088.3_GGA1|	84.52	478	56	8	1	466	3826020	3825549	2e-142	509	1	S
NorthernBobwhite_SimpleDeNovo_contig_18225	gi|358485511|ref|NC_006088.3_GGA1|	90.21	562	49	2	1	559	3826553	3825995	0	762	1	S
NorthernBobwhite_SimpleDeNovo_contig_77553	gi|358485511|ref|NC_006088.3_GGA1|	85.26	3541	370	22	481	3937	3827364	3830836	0	4071	17	M
NorthernBobwhite_SimpleDeNovo_contig_362809	gi|358485511|ref|NC_006088.3_GGA1|	83.78	37	3	1	157	190	3830367	3830403	0.5	39.2	3	M
NorthernBobwhite_SimpleDeNovo_contig_187095	gi|358485511|ref|NC_006088.3_GGA1|	85.47	6509	684	64	3	6340	3831981	3838398	0	7422	2	S
NorthernBobwhite_SimpleDeNovo_contig_314306	gi|358485511|ref|NC_006088.3_GGA1|	84.05	351	46	3	1	341	3841236	3841586	2e-102	376	1	S
NorthernBobwhite_SimpleDeNovo_contig_104512	gi|358485511|ref|NC_006088.3_GGA1|	85.55	1529	167	13	2	1495	3841260	3839751	0	1752	1	S
NorthernBobwhite_SimpleDeNovo_contig_224354	gi|358485511|ref|NC_006088.3_GGA1|	79.06	635	81	7	305	909	3842176	3841564	6e-158	562	2	S
NorthernBobwhite_SimpleDeNovo_contig_104513	gi|358485511|ref|NC_006088.3_GGA1|	84.88	1541	169	19	1	1486	3842797	3844328	0	1701	1	S
NorthernBobwhite_SimpleDeNovo_contig_224355	gi|358485511|ref|NC_006088.3_GGA1|	80.05	812	88	12	2	757	3844571	3845364	0	747	1	S
NorthernBobwhite_SimpleDeNovo_contig_346406	gi|358485511|ref|NC_006088.3_GGA1|	81.32	423	53	5	1	398	3851012	3851433	3e-112	408	1	S
NorthernBobwhite_SimpleDeNovo_contig_3046	gi|358485511|ref|NC_006088.3_GGA1|	87.58	3970	435	25	1	3923	3851037	3847079	0	4877	2	S
NorthernBobwhite_SimpleDeNovo_contig_321255	gi|358485511|ref|NC_006088.3_GGA1|	81.8	423	51	5	7	404	3851433	3851012	6e-115	417	1	S
NorthernBobwhite_SimpleDeNovo_contig_111029	gi|358485511|ref|NC_006088.3_GGA1|	87.7	2334	202	21	1	2289	3853707	3851414	0	2897	1	S
NorthernBobwhite_SimpleDeNovo_contig_111030	gi|358485511|ref|NC_006088.3_GGA1|	83.2	7422	833	91	8	7196	3853744	3860984	0	7726	3	M
NorthernBobwhite_SimpleDeNovo_contig_329603	gi|358485511|ref|NC_006088.3_GGA1|	94.34	106	6	0	1	106	3868292	3868397	5e-39	165	1	S
NorthernBobwhite_SimpleDeNovo_contig_9431	gi|358485511|ref|NC_006088.3_GGA1|	82.43	814	108	10	1	804	3868317	3867529	0	810	4093	M
NorthernBobwhite_SimpleDeNovo_contig_341080	gi|358485511|ref|NC_006088.3_GGA1|	95.28	106	5	0	220	325	3868397	3868292	4e-40	168	1	S
NorthernBobwhite_SimpleDeNovo_contig_152326	gi|358485511|ref|NC_006088.3_GGA1|	80.79	3945	475	42	1	3721	3872291	3868406	0	3763	1	S
NorthernBobwhite_SimpleDeNovo_contig_293326	gi|358485511|ref|NC_006088.3_GGA1|	100	27	0	0	135	161	3872601	3872627	0.0004	50	94	M
NorthernBobwhite_SimpleDeNovo_contig_233207	gi|358485511|ref|NC_006088.3_GGA1|	72.54	397	47	2	1	397	3873561	3873227	6e-71	271	1	S
NorthernBobwhite_SimpleDeNovo_contig_245731	gi|358485511|ref|NC_006088.3_GGA1|	72.54	397	47	2	1	397	3873561	3873227	6e-71	271	1	S
NorthernBobwhite_SimpleDeNovo_contig_217030	gi|358485511|ref|NC_006088.3_GGA1|	84.25	3524	418	35	1335	4773	3875500	3878971	0	3819	7302	M
NorthernBobwhite_SimpleDeNovo_contig_104065	gi|358485511|ref|NC_006088.3_GGA1|	74.9	247	49	7	6	243	3876249	3876007	4e-33	147	2505	M
NorthernBobwhite_SimpleDeNovo_contig_234785	gi|358485511|ref|NC_006088.3_GGA1|	82.79	4405	508	51	1	4312	3879008	3883255	0	4522	1	S
NorthernBobwhite_SimpleDeNovo_contig_303807	gi|358485511|ref|NC_006088.3_GGA1|	98.29	585	10	0	4	588	3883242	3883826	0	1011	1	S
NorthernBobwhite_SimpleDeNovo_contig_68804	gi|358485511|ref|NC_006088.3_GGA1|	83.49	3410	387	44	811	4086	3887577	3884210	0	3571	3	M
NorthernBobwhite_SimpleDeNovo_contig_301481	gi|358485511|ref|NC_006088.3_GGA1|	87.91	1456	148	16	2	1440	3889551	3888107	0	1786	1	S
NorthernBobwhite_SimpleDeNovo_contig_197288	gi|358485511|ref|NC_006088.3_GGA1|	82.15	1098	133	11	1	1038	3889762	3890856	0	1104	1	S
NorthernBobwhite_SimpleDeNovo_contig_305876	gi|358485511|ref|NC_006088.3_GGA1|	83.21	554	78	7	1	546	3890923	3891469	3e-158	562	1	S
NorthernBobwhite_SimpleDeNovo_contig_188529	gi|358485511|ref|NC_006088.3_GGA1|	77.43	443	57	8	3	415	3893885	3893456	8e-95	351	1	S
NorthernBobwhite_SimpleDeNovo_contig_124047	gi|358485511|ref|NC_006088.3_GGA1|	77.71	507	75	6	1	475	3894599	3894099	4e-113	412	1	S
NorthernBobwhite_SimpleDeNovo_contig_188530	gi|358485511|ref|NC_006088.3_GGA1|	83.52	2912	329	36	1	2823	3894650	3897499	0	3061	1	S
NorthernBobwhite_SimpleDeNovo_contig_312315	gi|358485511|ref|NC_006088.3_GGA1|	84.4	391	43	4	14	386	3897488	3897878	3e-118	428	1	S
NorthernBobwhite_SimpleDeNovo_contig_360375	gi|358485511|ref|NC_006088.3_GGA1|	84.96	399	43	6	14	403	3897488	3897878	7e-121	437	1	S
NorthernBobwhite_SimpleDeNovo_contig_60950	gi|358485511|ref|NC_006088.3_GGA1|	84.2	3443	434	32	764	4141	3898194	3901591	0	3712	532	M
NorthernBobwhite_SimpleDeNovo_contig_131311	gi|358485511|ref|NC_006088.3_GGA1|	93.08	665	41	5	613	1273	3902490	3903153	0	975	2	S
NorthernBobwhite_SimpleDeNovo_contig_364496	gi|358485511|ref|NC_006088.3_GGA1|	85.67	342	44	2	3	344	3905431	3905767	2e-107	392	1	S
NorthernBobwhite_SimpleDeNovo_contig_180720	gi|358485511|ref|NC_006088.3_GGA1|	79.68	2126	302	35	4	2041	3905451	3903368	0	1846	1	S
NorthernBobwhite_SimpleDeNovo_contig_350604	gi|358485511|ref|NC_006088.3_GGA1|	86.09	345	40	2	1	345	3905767	3905431	3e-111	405	1	S
NorthernBobwhite_SimpleDeNovo_contig_359629	gi|358485511|ref|NC_006088.3_GGA1|	81.43	210	27	2	6	208	3906303	3906507	6e-51	205	1	S
NorthernBobwhite_SimpleDeNovo_contig_352792	gi|358485511|ref|NC_006088.3_GGA1|	90.78	586	42	4	2	580	3906322	3905742	0	807	1	S
NorthernBobwhite_SimpleDeNovo_contig_228683	gi|358485511|ref|NC_006088.3_GGA1|	76.67	210	24	3	154	343	3906507	3906303	2e-39	167	2	S
NorthernBobwhite_SimpleDeNovo_contig_113199	gi|358485511|ref|NC_006088.3_GGA1|	82.87	572	65	9	8	563	3906871	3907425	1e-163	580	6	M
NorthernBobwhite_SimpleDeNovo_contig_152124	gi|358485511|ref|NC_006088.3_GGA1|	89.59	1652	150	12	1	1645	3909207	3907571	0	2170	1	S
NorthernBobwhite_SimpleDeNovo_contig_205558	gi|358485511|ref|NC_006088.3_GGA1|	82.14	655	101	9	2	653	3909348	3909989	3e-178	628	1	S
NorthernBobwhite_SimpleDeNovo_contig_126001	gi|358485511|ref|NC_006088.3_GGA1|	82.57	4401	584	36	1045	5333	3910972	3915301	0	4482	16	M
NorthernBobwhite_SimpleDeNovo_contig_243030	gi|358485511|ref|NC_006088.3_GGA1|	89.43	861	74	4	148	994	3915703	3916560	0	1141	1	S
NorthernBobwhite_SimpleDeNovo_contig_6219	gi|358485511|ref|NC_006088.3_GGA1|	83.96	5511	653	55	4913	10259	3922124	3916681	0	5914	252	M
NorthernBobwhite_SimpleDeNovo_contig_369589	gi|358485511|ref|NC_006088.3_GGA1|	90.91	33	3	0	82	114	3927744	3927776	0.006	46.4	767	M
NorthernBobwhite_SimpleDeNovo_contig_120175	gi|358485511|ref|NC_006088.3_GGA1|	81.59	1901	245	29	11	1839	3930068	3928201	0	1815	3	S
NorthernBobwhite_SimpleDeNovo_contig_112740	gi|358485511|ref|NC_006088.3_GGA1|	79.17	2040	231	37	2	1910	3932885	3930909	0	1772	2	S
NorthernBobwhite_SimpleDeNovo_contig_131155	gi|358485511|ref|NC_006088.3_GGA1|	76.41	479	67	19	1	447	3965614	3965150	9e-83	311	1	S
NorthernBobwhite_SimpleDeNovo_contig_99025	gi|358485511|ref|NC_006088.3_GGA1|	84.42	1836	208	19	86	1876	3966591	3968393	0	2006	3	M
NorthernBobwhite_SimpleDeNovo_contig_109486	gi|358485511|ref|NC_006088.3_GGA1|	86.85	2494	268	18	1	2452	3969029	3971504	0	2993	126	M
NorthernBobwhite_SimpleDeNovo_contig_304258	gi|358485511|ref|NC_006088.3_GGA1|	83.2	488	60	7	1	481	3973900	3974372	3e-139	499	1	S
NorthernBobwhite_SimpleDeNovo_contig_304259	gi|358485511|ref|NC_006088.3_GGA1|	83.54	486	62	4	1	481	3974372	3973900	4e-144	515	1	S
NorthernBobwhite_SimpleDeNovo_contig_237519	gi|358485511|ref|NC_006088.3_GGA1|	86.7	872	86	11	489	1342	3975206	3974347	0	1027	2	S
NorthernBobwhite_SimpleDeNovo_contig_262475	gi|358485511|ref|NC_006088.3_GGA1|	82.63	783	116	8	237	1009	3977272	3976500	0	782	9	M
NorthernBobwhite_SimpleDeNovo_contig_90532	gi|358485511|ref|NC_006088.3_GGA1|	76.25	320	60	2	170	477	3979638	3979323	1e-61	241	59	M
NorthernBobwhite_SimpleDeNovo_contig_33286	gi|358485511|ref|NC_006088.3_GGA1|	84.81	1909	236	13	1	1859	4009226	4007322	0	2125	49	M
NorthernBobwhite_SimpleDeNovo_contig_135640	gi|358485511|ref|NC_006088.3_GGA1|	77.68	578	101	11	4	555	4009332	4009907	1e-120	437	207	M
NorthernBobwhite_SimpleDeNovo_contig_260069	gi|358485511|ref|NC_006088.3_GGA1|	77.45	714	106	6	5	669	4009944	4009237	4e-165	585	327	M
NorthernBobwhite_SimpleDeNovo_contig_21098	gi|358485511|ref|NC_006088.3_GGA1|	82.83	466	49	4	1	435	4012043	4012508	1e-136	489	1	S
NorthernBobwhite_SimpleDeNovo_contig_243649	gi|358485511|ref|NC_006088.3_GGA1|	86.5	326	37	5	1	326	4012483	4012801	5e-102	374	1	S
NorthernBobwhite_SimpleDeNovo_contig_352567	gi|358485511|ref|NC_006088.3_GGA1|	87.35	324	36	4	1	324	4012483	4012801	8e-106	387	1	S
NorthernBobwhite_SimpleDeNovo_contig_82639	gi|358485511|ref|NC_006088.3_GGA1|	80.35	1445	178	20	1	1352	4012777	4014208	0	1332	2	S
NorthernBobwhite_SimpleDeNovo_contig_95793	gi|358485511|ref|NC_006088.3_GGA1|	86.33	900	79	9	488	1377	4015955	4016820	0	1068	3	S
NorthernBobwhite_SimpleDeNovo_contig_151172	gi|358485511|ref|NC_006088.3_GGA1|	75.43	411	45	10	110	468	4017590	4017996	8e-77	291	1	S
NorthernBobwhite_SimpleDeNovo_contig_151173	gi|358485511|ref|NC_006088.3_GGA1|	86.37	499	59	6	257	753	4018546	4018055	8e-162	574	1	S
NorthernBobwhite_SimpleDeNovo_contig_150056	gi|358485511|ref|NC_006088.3_GGA1|	78.39	833	128	16	2445	3241	4020239	4021055	0	666	17	M
NorthernBobwhite_SimpleDeNovo_contig_4479	gi|358485511|ref|NC_006088.3_GGA1|	78.64	5563	728	101	44	5356	4026456	4021104	0	4635	3	M
NorthernBobwhite_SimpleDeNovo_contig_213367	gi|358485511|ref|NC_006088.3_GGA1|	80.91	1168	147	18	77	1205	4027120	4028250	0	1088	1	S
NorthernBobwhite_SimpleDeNovo_contig_351687	gi|358485511|ref|NC_006088.3_GGA1|	82.1	715	102	11	14	711	4027120	4026415	0	686	1	S
NorthernBobwhite_SimpleDeNovo_contig_359027	gi|358485511|ref|NC_006088.3_GGA1|	80.63	351	41	4	1	327	4028578	4028231	2e-89	333	1	S
NorthernBobwhite_SimpleDeNovo_contig_363096	gi|358485511|ref|NC_006088.3_GGA1|	79.89	353	40	6	1	327	4028578	4028231	4e-85	318	1	S
NorthernBobwhite_SimpleDeNovo_contig_73335	gi|358485511|ref|NC_006088.3_GGA1|	82.08	4927	610	68	4048	8770	4036286	4031429	0	4845	3	S
NorthernBobwhite_SimpleDeNovo_contig_251594	gi|358485511|ref|NC_006088.3_GGA1|	79.45	579	81	10	1	545	4040313	4040887	1e-138	497	2	M
NorthernBobwhite_SimpleDeNovo_contig_251595	gi|358485511|ref|NC_006088.3_GGA1|	77.89	579	90	9	1	545	4040313	4040887	8e-128	461	1	S
NorthernBobwhite_SimpleDeNovo_contig_179207	gi|358485511|ref|NC_006088.3_GGA1|	81.86	2216	265	28	1	2153	4040862	4043003	0	2181	1	S
NorthernBobwhite_SimpleDeNovo_contig_59629	gi|358485511|ref|NC_006088.3_GGA1|	86.5	674	63	7	5	665	4044294	4043636	0	800	1	S
NorthernBobwhite_SimpleDeNovo_contig_220291	gi|358485511|ref|NC_006088.3_GGA1|	79.65	904	120	20	435	1301	4045277	4046153	0	769	2	S
NorthernBobwhite_SimpleDeNovo_contig_59630	gi|358485511|ref|NC_006088.3_GGA1|	85.39	1684	158	13	1	1623	4046263	4047919	0	1948	1	S
NorthernBobwhite_SimpleDeNovo_contig_14057	gi|358485511|ref|NC_006088.3_GGA1|	86.28	7230	707	68	701	7742	4049256	4056388	0	8516	2	S
NorthernBobwhite_SimpleDeNovo_contig_67594	gi|358485511|ref|NC_006088.3_GGA1|	84.37	4838	488	51	2570	7217	4061136	4056377	0	5328	66	M
NorthernBobwhite_SimpleDeNovo_contig_43653	gi|358485511|ref|NC_006088.3_GGA1|	85.63	1037	100	11	1	1003	4063557	4064578	0	1193	2	S
NorthernBobwhite_SimpleDeNovo_contig_17717	gi|358485511|ref|NC_006088.3_GGA1|	85.44	5466	587	48	2	5340	4071047	4065664	0	6253	3163	M
NorthernBobwhite_SimpleDeNovo_contig_139215	gi|358485511|ref|NC_006088.3_GGA1|	85.43	549	46	4	357	871	4071768	4071220	0	643	2	S
NorthernBobwhite_SimpleDeNovo_contig_188224	gi|358485511|ref|NC_006088.3_GGA1|	87.56	434	41	5	2	435	4072324	4072744	2e-148	529	1	S
NorthernBobwhite_SimpleDeNovo_contig_188223	gi|358485511|ref|NC_006088.3_GGA1|	86.87	434	44	5	33	466	4072744	4072324	4e-144	515	1	S
NorthernBobwhite_SimpleDeNovo_contig_190161	gi|358485511|ref|NC_006088.3_GGA1|	86.93	2471	243	16	161	2597	4075227	4072803	0	3000	1	S
NorthernBobwhite_SimpleDeNovo_contig_202985	gi|358485511|ref|NC_006088.3_GGA1|	88.4	1828	184	9	358	2168	4077988	4076172	0	2325	3	S
NorthernBobwhite_SimpleDeNovo_contig_170502	gi|358485511|ref|NC_006088.3_GGA1|	87.02	1371	150	7	22	1375	4080722	4079363	0	1663	2	S
NorthernBobwhite_SimpleDeNovo_contig_53687	gi|358485511|ref|NC_006088.3_GGA1|	83.35	2325	257	23	15	2272	4082976	4080715	0	2462	574	M
NorthernBobwhite_SimpleDeNovo_contig_251364	gi|358485511|ref|NC_006088.3_GGA1|	86.44	2014	188	15	2	1975	4085259	4083291	0	2410	4	M
NorthernBobwhite_SimpleDeNovo_contig_127765	gi|358485511|ref|NC_006088.3_GGA1|	85.39	1307	135	17	812	2087	4087390	4086109	0	1471	3	S
NorthernBobwhite_SimpleDeNovo_contig_54240	gi|358485511|ref|NC_006088.3_GGA1|	86.62	1532	174	11	1	1507	4093377	4091852	0	1817	3	S
NorthernBobwhite_SimpleDeNovo_contig_54239	gi|358485511|ref|NC_006088.3_GGA1|	83.19	3409	361	41	1	3267	4093707	4097045	0	3571	1	S
NorthernBobwhite_SimpleDeNovo_contig_180134	gi|358485511|ref|NC_006088.3_GGA1|	84.98	1132	138	9	4	1128	4099302	4098196	0	1263	1258	M
NorthernBobwhite_SimpleDeNovo_contig_182438	gi|358485511|ref|NC_006088.3_GGA1|	83.68	1446	178	18	3	1419	4100779	4099363	0	1516	1	S
NorthernBobwhite_SimpleDeNovo_contig_135381	gi|358485511|ref|NC_006088.3_GGA1|	84.76	3583	391	31	4	3492	4101460	4104981	0	4001	1	S
NorthernBobwhite_SimpleDeNovo_contig_363224	gi|358485511|ref|NC_006088.3_GGA1|	87.65	170	20	1	1	170	4105296	4105128	5e-52	208	1	S
NorthernBobwhite_SimpleDeNovo_contig_33207	gi|358485511|ref|NC_006088.3_GGA1|	84.76	4770	495	39	349	4954	4111081	4106380	0	5359	3	S
NorthernBobwhite_SimpleDeNovo_contig_50260	gi|358485511|ref|NC_006088.3_GGA1|	85.58	2011	204	18	3	1952	4113698	4111713	0	2316	1	S
NorthernBobwhite_SimpleDeNovo_contig_103058	gi|358485511|ref|NC_006088.3_GGA1|	86.13	4918	472	46	1	4784	4113755	4118596	0	5777	1	S
NorthernBobwhite_SimpleDeNovo_contig_206228	gi|358485511|ref|NC_006088.3_GGA1|	82.06	4448	494	47	1	4213	4118672	4123050	0	4486	1	S
NorthernBobwhite_SimpleDeNovo_contig_298908	gi|358485511|ref|NC_006088.3_GGA1|	80.6	536	63	9	1	497	4123260	4123793	4e-138	495	1	S
NorthernBobwhite_SimpleDeNovo_contig_262673	gi|358485511|ref|NC_006088.3_GGA1|	77.53	316	61	5	1	309	4123768	4124080	1e-60	237	1	S
NorthernBobwhite_SimpleDeNovo_contig_262672	gi|358485511|ref|NC_006088.3_GGA1|	79.3	314	56	4	1	307	4123768	4124079	7e-69	264	1	S
NorthernBobwhite_SimpleDeNovo_contig_151908	gi|358485511|ref|NC_006088.3_GGA1|	81.08	3367	418	47	4	3198	4131049	4127730	0	3186	5	M
NorthernBobwhite_SimpleDeNovo_contig_229361	gi|358485511|ref|NC_006088.3_GGA1|	78.76	739	83	6	268	990	4131857	4132537	0	664	5758	M
NorthernBobwhite_SimpleDeNovo_contig_234509	gi|358485511|ref|NC_006088.3_GGA1|	88.26	511	44	3	98	598	4133005	4133509	0	652	1	S
NorthernBobwhite_SimpleDeNovo_contig_32077	gi|358485511|ref|NC_006088.3_GGA1|	85.94	2126	217	26	1	2068	4133579	4135680	0	2443	1	S
NorthernBobwhite_SimpleDeNovo_contig_267443	gi|358485511|ref|NC_006088.3_GGA1|	84.62	221	22	3	1	214	4136620	4136835	2e-62	242	1	S
NorthernBobwhite_SimpleDeNovo_contig_325690	gi|358485511|ref|NC_006088.3_GGA1|	84.3	223	21	3	1	216	4136620	4136835	7e-63	244	1	S
NorthernBobwhite_SimpleDeNovo_contig_71096	gi|358485511|ref|NC_006088.3_GGA1|	83.61	4601	517	41	1	4432	4142000	4137468	0	4928	1	S
NorthernBobwhite_SimpleDeNovo_contig_87855	gi|358485511|ref|NC_006088.3_GGA1|	74.12	1422	217	25	1091	2390	4143645	4142253	0	930	3	S
NorthernBobwhite_SimpleDeNovo_contig_37022	gi|358485511|ref|NC_006088.3_GGA1|	85.96	57	8	0	71724	71780	4144319	4144263	6e-07	68	83	M
NorthernBobwhite_SimpleDeNovo_contig_109366	gi|358485511|ref|NC_006088.3_GGA1|	87.18	991	103	11	1253	2233	4147438	4148414	0	1187	4	S
NorthernBobwhite_SimpleDeNovo_contig_26646	gi|358485511|ref|NC_006088.3_GGA1|	83.16	2405	298	37	1952	4300	4151823	4149470	0	2441	3	S
NorthernBobwhite_SimpleDeNovo_contig_174934	gi|358485511|ref|NC_006088.3_GGA1|	77.19	2126	310	35	987	2976	4155843	4153757	0	1647	2	S
NorthernBobwhite_SimpleDeNovo_contig_180493	gi|358485511|ref|NC_006088.3_GGA1|	82.34	1772	183	16	5	1661	4157384	4159140	0	1829	14	M
NorthernBobwhite_SimpleDeNovo_contig_236711	gi|358485511|ref|NC_006088.3_GGA1|	84.21	133	20	1	1	132	4159401	4159269	8e-32	141	1	S
NorthernBobwhite_SimpleDeNovo_contig_130428	gi|358485511|ref|NC_006088.3_GGA1|	82.34	368	48	4	472	831	4159680	4160038	6e-100	369	2	S
NorthernBobwhite_SimpleDeNovo_contig_261217	gi|358485511|ref|NC_006088.3_GGA1|	83.12	871	96	9	3	849	4161361	4160518	0	913	1	S
NorthernBobwhite_SimpleDeNovo_contig_191864	gi|358485511|ref|NC_006088.3_GGA1|	85.89	567	77	3	188	753	4161880	4162444	0	652	2048	M
NorthernBobwhite_SimpleDeNovo_contig_210553	gi|358485511|ref|NC_006088.3_GGA1|	83.75	6007	733	70	1	5850	4162513	4168433	0	6336	1	S
NorthernBobwhite_SimpleDeNovo_contig_81464	gi|358485511|ref|NC_006088.3_GGA1|	86.12	3443	308	41	1	3387	4171760	4168432	0	4022	1	S
NorthernBobwhite_SimpleDeNovo_contig_8644	gi|358485511|ref|NC_006088.3_GGA1|	90.05	3147	227	26	1609	4710	4175262	4172157	0	4224	2	S
NorthernBobwhite_SimpleDeNovo_contig_8643	gi|358485511|ref|NC_006088.3_GGA1|	85.44	1800	189	15	1	1753	4177220	4178993	0	2064	2	S
NorthernBobwhite_SimpleDeNovo_contig_1257	gi|358485511|ref|NC_006088.3_GGA1|	79.34	3296	457	55	2064	5225	4182935	4186140	0	2828	2	S
NorthernBobwhite_SimpleDeNovo_contig_301090	gi|358485511|ref|NC_006088.3_GGA1|	73.54	325	35	6	40	345	4186456	4186164	1e-54	217	1	S
NorthernBobwhite_SimpleDeNovo_contig_367700	gi|358485511|ref|NC_006088.3_GGA1|	88.89	36	4	0	39	74	4186590	4186625	0.002	48.2	25	M
NorthernBobwhite_SimpleDeNovo_contig_250618	gi|358485511|ref|NC_006088.3_GGA1|	84.03	576	75	4	1	562	4191985	4192557	4e-176	621	1	S
NorthernBobwhite_SimpleDeNovo_contig_250619	gi|358485511|ref|NC_006088.3_GGA1|	82.29	576	76	5	1	553	4191985	4192557	1e-163	580	1	S
NorthernBobwhite_SimpleDeNovo_contig_103755	gi|358485511|ref|NC_006088.3_GGA1|	90.74	5627	394	41	1	5579	4192010	4186463	0	7728	5022	M
NorthernBobwhite_SimpleDeNovo_contig_202669	gi|358485511|ref|NC_006088.3_GGA1|	83.27	2379	298	31	553	2874	4193178	4195513	0	2446	2	S
NorthernBobwhite_SimpleDeNovo_contig_207984	gi|358485511|ref|NC_006088.3_GGA1|	87.37	5200	485	39	2	5090	4200764	4195626	0	6396	2	M
NorthernBobwhite_SimpleDeNovo_contig_164594	gi|358485511|ref|NC_006088.3_GGA1|	90.44	1130	88	5	2	1116	4201987	4200863	0	1546	1	S
NorthernBobwhite_SimpleDeNovo_contig_207053	gi|358485511|ref|NC_006088.3_GGA1|	85.21	994	96	11	3	952	4202104	4203090	0	1126	1	S
NorthernBobwhite_SimpleDeNovo_contig_64040	gi|358485511|ref|NC_006088.3_GGA1|	82.32	2144	267	23	1	2084	4203292	4205383	0	2156	8	M
NorthernBobwhite_SimpleDeNovo_contig_296528	gi|358485511|ref|NC_006088.3_GGA1|	81.97	61	7	3	162	218	4208842	4208782	0.0003	51.8	143	M
NorthernBobwhite_SimpleDeNovo_contig_41140	gi|358485511|ref|NC_006088.3_GGA1|	87.14	1540	148	13	1	1515	4211831	4210317	0	1871	2	S
NorthernBobwhite_SimpleDeNovo_contig_41141	gi|358485511|ref|NC_006088.3_GGA1|	86.97	4697	428	40	1269	5857	4212989	4217609	0	5698	2	S
NorthernBobwhite_SimpleDeNovo_contig_167124	gi|358485511|ref|NC_006088.3_GGA1|	90.83	1592	121	8	833	2406	4218946	4220530	0	2199	2	S
NorthernBobwhite_SimpleDeNovo_contig_223954	gi|358485511|ref|NC_006088.3_GGA1|	83.47	1216	143	10	684	1855	4221734	4220533	0	1294	2	S
NorthernBobwhite_SimpleDeNovo_contig_293160	gi|358485511|ref|NC_006088.3_GGA1|	83.27	526	56	10	9	509	4222914	4223432	2e-150	536	1	S
NorthernBobwhite_SimpleDeNovo_contig_52539	gi|358485511|ref|NC_006088.3_GGA1|	87.31	3097	253	33	1302	4316	4226500	4223462	0	3791	3	S
NorthernBobwhite_SimpleDeNovo_contig_52347	gi|358485511|ref|NC_006088.3_GGA1|	85.75	5424	513	51	1	5276	4228228	4233539	0	6302	2	M
NorthernBobwhite_SimpleDeNovo_contig_181919	gi|358485511|ref|NC_006088.3_GGA1|	90.68	987	79	4	2	988	4233682	4234655	0	1359	1	S
NorthernBobwhite_SimpleDeNovo_contig_345046	gi|358485511|ref|NC_006088.3_GGA1|	81.67	60	7	3	354	411	4239480	4239537	0.0004	50	124	M
NorthernBobwhite_SimpleDeNovo_contig_164637	gi|358485511|ref|NC_006088.3_GGA1|	93.02	5188	265	30	4	5130	4240232	4235081	0	7676	1	S
NorthernBobwhite_SimpleDeNovo_contig_142267	gi|358485511|ref|NC_006088.3_GGA1|	90.14	2454	167	13	2	2404	4240318	4242747	0	3344	3	S
NorthernBobwhite_SimpleDeNovo_contig_316418	gi|358485511|ref|NC_006088.3_GGA1|	74.77	111	18	4	1483	1592	4242744	4242845	2e-08	66.2	44	M
NorthernBobwhite_SimpleDeNovo_contig_372315	gi|358485511|ref|NC_006088.3_GGA1|	72.73	154	29	5	240	388	4242750	4242895	8e-13	78.8	1	S
NorthernBobwhite_SimpleDeNovo_contig_30554	gi|358485511|ref|NC_006088.3_GGA1|	72.5	160	25	8	1064	1206	4242750	4242907	1e-09	71.6	114	M
NorthernBobwhite_SimpleDeNovo_contig_361223	gi|358485511|ref|NC_006088.3_GGA1|	75.53	94	14	2	1339	1423	4242750	4242843	2e-08	66.2	86	M
NorthernBobwhite_SimpleDeNovo_contig_320442	gi|358485511|ref|NC_006088.3_GGA1|	70.47	193	41	6	1275	1451	4242751	4242943	3e-12	78.8	2	M
NorthernBobwhite_SimpleDeNovo_contig_163216	gi|358485511|ref|NC_006088.3_GGA1|	78.21	78	12	3	554	628	4242751	4242826	1e-05	55.4	150	M
NorthernBobwhite_SimpleDeNovo_contig_101809	gi|358485511|ref|NC_006088.3_GGA1|	80.49	82	12	3	408	485	4242751	4242832	6e-08	66.2	171	M
NorthernBobwhite_SimpleDeNovo_contig_336063	gi|358485511|ref|NC_006088.3_GGA1|	72.92	96	24	1	163	258	4242751	4242844	4e-05	53.6	128	M
NorthernBobwhite_SimpleDeNovo_contig_345997	gi|358485511|ref|NC_006088.3_GGA1|	75.36	207	35	9	573	772	4242752	4242949	2e-24	118	6	M
NorthernBobwhite_SimpleDeNovo_contig_117846	gi|358485511|ref|NC_006088.3_GGA1|	68.79	173	34	8	1646	1809	4242753	4242914	0.0005	51.8	13	M
NorthernBobwhite_SimpleDeNovo_contig_155315	gi|358485511|ref|NC_006088.3_GGA1|	73.45	113	27	3	1536	1647	4242753	4242863	4e-06	59	179	M
NorthernBobwhite_SimpleDeNovo_contig_322444	gi|358485511|ref|NC_006088.3_GGA1|	73.53	170	36	7	1932	2097	4242755	4242919	1e-12	80.6	1	S
NorthernBobwhite_SimpleDeNovo_contig_100897	gi|358485511|ref|NC_006088.3_GGA1|	73.21	112	17	3	1996	2094	4242755	4242866	4e-08	66.2	80	M
NorthernBobwhite_SimpleDeNovo_contig_302908	gi|358485511|ref|NC_006088.3_GGA1|	81.48	81	10	2	33	113	4242757	4242832	8e-12	75.2	1	S
NorthernBobwhite_SimpleDeNovo_contig_370089	gi|358485511|ref|NC_006088.3_GGA1|	73.12	93	14	3	566	657	4242758	4242840	0.0002	51.8	94	M
NorthernBobwhite_SimpleDeNovo_contig_174174	gi|358485511|ref|NC_006088.3_GGA1|	75.23	109	23	2	85	190	4242760	4242867	9e-10	69.8	128	M
NorthernBobwhite_SimpleDeNovo_contig_277835	gi|358485511|ref|NC_006088.3_GGA1|	77.22	79	14	1	1076	1150	4242765	4242843	6e-07	60.8	187	M
NorthernBobwhite_SimpleDeNovo_contig_344861	gi|358485511|ref|NC_006088.3_GGA1|	88.89	36	4	0	136	171	4242783	4242818	0.001	48.2	74	M
NorthernBobwhite_SimpleDeNovo_contig_372395	gi|358485511|ref|NC_006088.3_GGA1|	93.75	32	2	0	1	32	4242784	4242753	0.0006	50	63	M
NorthernBobwhite_SimpleDeNovo_contig_371963	gi|358485511|ref|NC_006088.3_GGA1|	75.95	79	12	3	306	377	4242785	4242863	0.0003	50	78	M
NorthernBobwhite_SimpleDeNovo_contig_310093	gi|358485511|ref|NC_006088.3_GGA1|	72.61	157	31	5	126	273	4242788	4242941	7e-12	78.8	508	M
NorthernBobwhite_SimpleDeNovo_contig_228966	gi|358485511|ref|NC_006088.3_GGA1|	72.47	178	31	7	1068	1245	4242789	4242948	3e-14	86	2	M
NorthernBobwhite_SimpleDeNovo_contig_335921	gi|358485511|ref|NC_006088.3_GGA1|	77.68	112	19	4	575	686	4242790	4242895	4e-12	77	2	M
NorthernBobwhite_SimpleDeNovo_contig_351359	gi|358485511|ref|NC_006088.3_GGA1|	69.68	155	31	7	151	297	4242790	4242936	0.0002	51.8	126	M
NorthernBobwhite_SimpleDeNovo_contig_363822	gi|358485511|ref|NC_006088.3_GGA1|	81.48	54	9	1	1	54	4242813	4242761	0.0003	50	493	M
NorthernBobwhite_SimpleDeNovo_contig_334778	gi|358485511|ref|NC_006088.3_GGA1|	74.07	108	24	2	480	587	4242816	4242919	8e-08	64.4	235	M
NorthernBobwhite_SimpleDeNovo_contig_367900	gi|358485511|ref|NC_006088.3_GGA1|	80.65	62	8	2	245	305	4242825	4242767	3e-05	53.6	490	M
NorthernBobwhite_SimpleDeNovo_contig_243660	gi|358485511|ref|NC_006088.3_GGA1|	75	96	18	2	1	96	4242846	4242757	3e-07	62.6	27	M
NorthernBobwhite_SimpleDeNovo_contig_48232	gi|358485511|ref|NC_006088.3_GGA1|	81.97	61	9	1	21646	21706	4242846	4242788	4e-05	59	385	M
NorthernBobwhite_SimpleDeNovo_contig_99506	gi|358485511|ref|NC_006088.3_GGA1|	81.82	66	6	1	1	66	4242846	4242787	2e-08	66.2	42	M
NorthernBobwhite_SimpleDeNovo_contig_135617	gi|358485511|ref|NC_006088.3_GGA1|	82.26	62	7	1	257	318	4242847	4242790	1e-07	62.6	54	M
NorthernBobwhite_SimpleDeNovo_contig_92024	gi|358485511|ref|NC_006088.3_GGA1|	78.95	76	14	1	3723	3796	4242847	4242772	2e-06	62.6	173	M
NorthernBobwhite_SimpleDeNovo_contig_150137	gi|358485511|ref|NC_006088.3_GGA1|	89.83	59	6	0	1771	1829	4242848	4242790	1e-11	80.6	2	S
NorthernBobwhite_SimpleDeNovo_contig_372146	gi|358485511|ref|NC_006088.3_GGA1|	75.89	112	22	3	1	107	4242864	4242753	1e-10	71.6	71	M
NorthernBobwhite_SimpleDeNovo_contig_171640	gi|358485511|ref|NC_006088.3_GGA1|	78.64	103	16	2	1643	1739	4242891	4242789	1e-13	84.2	1	S
NorthernBobwhite_SimpleDeNovo_contig_142424	gi|358485511|ref|NC_006088.3_GGA1|	73.87	111	15	3	433	538	4242892	4242791	7e-10	69.8	261	M
NorthernBobwhite_SimpleDeNovo_contig_325574	gi|358485511|ref|NC_006088.3_GGA1|	72.97	148	32	5	1094	1236	4242895	4242751	4e-10	71.6	164	M
NorthernBobwhite_SimpleDeNovo_contig_356257	gi|358485511|ref|NC_006088.3_GGA1|	76.86	121	22	4	141	260	4242905	4242790	3e-13	80.6	2	M
NorthernBobwhite_SimpleDeNovo_contig_200225	gi|358485511|ref|NC_006088.3_GGA1|	73.64	129	19	4	305	419	4242917	4242790	2e-11	75.2	1	S
NorthernBobwhite_SimpleDeNovo_contig_160650	gi|358485511|ref|NC_006088.3_GGA1|	74.47	141	24	5	631	764	4242919	4242784	2e-12	80.6	1	S
NorthernBobwhite_SimpleDeNovo_contig_368127	gi|358485511|ref|NC_006088.3_GGA1|	84.91	53	5	1	1	50	4242919	4242867	5e-07	59	37	M
NorthernBobwhite_SimpleDeNovo_contig_179566	gi|358485511|ref|NC_006088.3_GGA1|	69.23	143	24	5	540	677	4242920	4242793	4e-05	55.4	140	M
NorthernBobwhite_SimpleDeNovo_contig_277336	gi|358485511|ref|NC_006088.3_GGA1|	75	156	23	6	1523	1663	4242933	4242779	4e-16	93.3	3	M
NorthernBobwhite_SimpleDeNovo_contig_281000	gi|358485511|ref|NC_006088.3_GGA1|	77.12	153	20	7	50	199	4242941	4242801	2e-18	100	6	M
NorthernBobwhite_SimpleDeNovo_contig_307586	gi|358485511|ref|NC_006088.3_GGA1|	69.28	153	33	5	745	890	4242941	4242796	2e-08	66.2	43	M
NorthernBobwhite_SimpleDeNovo_contig_335651	gi|358485511|ref|NC_006088.3_GGA1|	71.03	214	36	9	2483	2684	4242949	4242750	3e-15	89.7	1	S
NorthernBobwhite_SimpleDeNovo_contig_129753	gi|358485511|ref|NC_006088.3_GGA1|	84.6	1643	210	13	1	1607	4245343	4246978	0	1802	1	S
NorthernBobwhite_SimpleDeNovo_contig_194641	gi|358485511|ref|NC_006088.3_GGA1|	84.2	753	93	8	4	742	4247835	4247095	0	809	1	S
NorthernBobwhite_SimpleDeNovo_contig_159106	gi|358485511|ref|NC_006088.3_GGA1|	86.38	6066	577	62	1	5902	4247894	4253874	0	7160	1	S
NorthernBobwhite_SimpleDeNovo_contig_161123	gi|358485511|ref|NC_006088.3_GGA1|	79.71	69	11	1	988	1056	4249222	4249287	7e-07	60.8	1837	M
NorthernBobwhite_SimpleDeNovo_contig_237683	gi|358485511|ref|NC_006088.3_GGA1|	82.09	67	12	0	4029	4095	4249227	4249293	1e-08	68	364	M
NorthernBobwhite_SimpleDeNovo_contig_256186	gi|358485511|ref|NC_006088.3_GGA1|	80	60	12	0	2625	2684	4249232	4249291	0.0001	55.4	56	M
NorthernBobwhite_SimpleDeNovo_contig_316565	gi|358485511|ref|NC_006088.3_GGA1|	76.71	73	15	1	94	166	4249244	4249314	3e-05	53.6	1	S
NorthernBobwhite_SimpleDeNovo_contig_148156	gi|358485511|ref|NC_006088.3_GGA1|	80.77	52	6	2	80	131	4249248	4249295	0.036	44.6	25	M
NorthernBobwhite_SimpleDeNovo_contig_294389	gi|358485511|ref|NC_006088.3_GGA1|	95	40	2	0	598	637	4249254	4249293	3e-08	64.4	98	M
NorthernBobwhite_SimpleDeNovo_contig_318949	gi|358485511|ref|NC_006088.3_GGA1|	92.31	39	3	0	207	245	4249255	4249293	3e-06	57.2	52	M
NorthernBobwhite_SimpleDeNovo_contig_285960	gi|358485511|ref|NC_006088.3_GGA1|	89.47	38	4	0	683	720	4249261	4249298	0.0002	51.8	48	M
NorthernBobwhite_SimpleDeNovo_contig_355278	gi|358485511|ref|NC_006088.3_GGA1|	93.94	33	2	0	1	33	4249265	4249233	8e-05	51.8	2360	M
NorthernBobwhite_SimpleDeNovo_contig_196659	gi|358485511|ref|NC_006088.3_GGA1|	86.79	53	6	1	577	628	4249293	4249241	2e-06	60.8	93	M
NorthernBobwhite_SimpleDeNovo_contig_337597	gi|358485511|ref|NC_006088.3_GGA1|	94.59	37	2	0	180	216	4249293	4249257	2e-06	59	31	M
NorthernBobwhite_SimpleDeNovo_contig_359908	gi|358485511|ref|NC_006088.3_GGA1|	89.47	38	4	0	110	147	4249293	4249256	8e-05	51.8	412	M
NorthernBobwhite_SimpleDeNovo_contig_156722	gi|358485511|ref|NC_006088.3_GGA1|	86.21	58	8	0	9825	9882	4249308	4249251	2e-08	69.8	331	M
NorthernBobwhite_SimpleDeNovo_contig_243166	gi|358485511|ref|NC_006088.3_GGA1|	93.94	33	2	0	3	35	4249314	4249282	0.0002	51.8	125	M
NorthernBobwhite_SimpleDeNovo_contig_372775	gi|358485511|ref|NC_006088.3_GGA1|	78.33	60	11	1	84	143	4249314	4249257	0.001	48.2	65	M
NorthernBobwhite_SimpleDeNovo_contig_297901	gi|358485511|ref|NC_006088.3_GGA1|	85.71	336	42	1	18	353	4254430	4254759	8e-107	390	1	S
NorthernBobwhite_SimpleDeNovo_contig_137241	gi|358485511|ref|NC_006088.3_GGA1|	89.92	4057	304	24	2	3993	4258775	4254759	0	5460	1	S
NorthernBobwhite_SimpleDeNovo_contig_137242	gi|358485511|ref|NC_006088.3_GGA1|	88.22	3575	267	32	3	3464	4259120	4262653	0	4543	1	S
NorthernBobwhite_SimpleDeNovo_contig_256323	gi|358485511|ref|NC_006088.3_GGA1|	77.4	407	50	3	1	379	4259143	4258751	1e-92	343	1	S
NorthernBobwhite_SimpleDeNovo_contig_369281	gi|358485511|ref|NC_006088.3_GGA1|	79.01	405	45	3	1	377	4259143	4258751	8e-101	370	1	S
NorthernBobwhite_SimpleDeNovo_contig_142269	gi|358485511|ref|NC_006088.3_GGA1|	89.58	7402	516	57	47	7339	4270019	4262764	0	9845	1	S
NorthernBobwhite_SimpleDeNovo_contig_230559	gi|358485511|ref|NC_006088.3_GGA1|	83.25	627	70	8	6	605	4270293	4270911	0	654	1	S
NorthernBobwhite_SimpleDeNovo_contig_159516	gi|358485511|ref|NC_006088.3_GGA1|	82.42	364	56	3	2	358	4270887	4271249	4e-98	361	1	S
NorthernBobwhite_SimpleDeNovo_contig_159517	gi|358485511|ref|NC_006088.3_GGA1|	82.14	364	57	3	1	357	4271249	4270887	5e-97	358	1	S
NorthernBobwhite_SimpleDeNovo_contig_24119	gi|358485511|ref|NC_006088.3_GGA1|	87.72	6701	652	41	164	6749	4277868	4271224	0	8343	1	S
NorthernBobwhite_SimpleDeNovo_contig_226018	gi|358485511|ref|NC_006088.3_GGA1|	86.7	970	87	9	1	958	4278313	4279252	0	1166	1	S
NorthernBobwhite_SimpleDeNovo_contig_231429	gi|358485511|ref|NC_006088.3_GGA1|	66.74	433	62	10	1	354	4279963	4279534	1e-37	161	2228	M
NorthernBobwhite_SimpleDeNovo_contig_33349	gi|358485511|ref|NC_006088.3_GGA1|	81.31	2392	247	29	976	3239	4282257	4279938	0	2349	1	S
NorthernBobwhite_SimpleDeNovo_contig_260537	gi|358485511|ref|NC_006088.3_GGA1|	82.54	1964	192	33	1	1871	4283394	4285299	0	1983	1	S
NorthernBobwhite_SimpleDeNovo_contig_278232	gi|358485511|ref|NC_006088.3_GGA1|	95.01	621	28	3	9	628	4285842	4286460	0	969	1	S
NorthernBobwhite_SimpleDeNovo_contig_211763	gi|358485511|ref|NC_006088.3_GGA1|	88.44	346	20	2	1	329	4289561	4289219	7e-126	453	1	S
NorthernBobwhite_SimpleDeNovo_contig_270789	gi|358485511|ref|NC_006088.3_GGA1|	76.66	587	92	11	64	635	4290152	4289596	5e-119	432	1	S
NorthernBobwhite_SimpleDeNovo_contig_269751	gi|358485511|ref|NC_006088.3_GGA1|	77.88	217	27	4	43	259	4290208	4290403	3e-42	176	1	S
NorthernBobwhite_SimpleDeNovo_contig_367743	gi|358485511|ref|NC_006088.3_GGA1|	85.15	532	42	8	1	516	4293015	4292505	3e-170	601	1	S
NorthernBobwhite_SimpleDeNovo_contig_191674	gi|358485511|ref|NC_006088.3_GGA1|	75.29	781	85	19	1	710	4293752	4293009	8e-155	551	1	S
NorthernBobwhite_SimpleDeNovo_contig_154809	gi|358485511|ref|NC_006088.3_GGA1|	76.03	1452	194	33	33	1378	4294073	4295476	0	1040	1	S
NorthernBobwhite_SimpleDeNovo_contig_369847	gi|358485511|ref|NC_006088.3_GGA1|	85.14	296	25	6	13	292	4295554	4295846	2e-87	325	1	S
NorthernBobwhite_SimpleDeNovo_contig_292496	gi|358485511|ref|NC_006088.3_GGA1|	77.91	516	46	10	17	490	4296382	4296871	1e-119	434	1	S
NorthernBobwhite_SimpleDeNovo_contig_196468	gi|358485511|ref|NC_006088.3_GGA1|	87.81	919	41	13	741	1635	4297675	4298546	0	1159	2	S
NorthernBobwhite_SimpleDeNovo_contig_322512	gi|358485511|ref|NC_006088.3_GGA1|	89.2	1352	107	14	37	1368	4299957	4298625	0	1752	1	S
NorthernBobwhite_SimpleDeNovo_contig_12385	gi|358485511|ref|NC_006088.3_GGA1|	88.42	1736	121	8	1	1660	4300087	4301818	0	2260	1	S
NorthernBobwhite_SimpleDeNovo_contig_44898	gi|358485511|ref|NC_006088.3_GGA1|	84.27	2346	261	26	1	2286	4302069	4304366	0	2547	1	S
NorthernBobwhite_SimpleDeNovo_contig_101590	gi|358485511|ref|NC_006088.3_GGA1|	89.26	5995	435	38	1	5898	4304523	4310405	0	7925	1	S
NorthernBobwhite_SimpleDeNovo_contig_178319	gi|358485511|ref|NC_006088.3_GGA1|	81.24	1754	204	20	3	1715	4310604	4312273	0	1703	1	S
NorthernBobwhite_SimpleDeNovo_contig_208238	gi|358485511|ref|NC_006088.3_GGA1|	84.85	2099	209	15	1	2040	4314412	4312364	0	2383	1	S
NorthernBobwhite_SimpleDeNovo_contig_119197	gi|358485511|ref|NC_006088.3_GGA1|	88.69	4263	324	52	1	4170	4318827	4314630	0	5424	1	S
NorthernBobwhite_SimpleDeNovo_contig_124611	gi|358485511|ref|NC_006088.3_GGA1|	87.25	353	36	2	1	344	4319319	4318967	7e-120	434	1	S
NorthernBobwhite_SimpleDeNovo_contig_310612	gi|358485511|ref|NC_006088.3_GGA1|	83.06	679	83	10	3	663	4319472	4320136	0	690	1	S
NorthernBobwhite_SimpleDeNovo_contig_343154	gi|358485511|ref|NC_006088.3_GGA1|	83.28	293	38	4	2	291	4319852	4320136	9e-80	300	1	S
NorthernBobwhite_SimpleDeNovo_contig_124612	gi|358485511|ref|NC_006088.3_GGA1|	84.55	2770	345	26	2863	5574	4322909	4325653	0	3023	3	S
NorthernBobwhite_SimpleDeNovo_contig_325584	gi|358485511|ref|NC_006088.3_GGA1|	88.04	418	45	4	10	425	4326327	4325913	3e-144	515	1	S
NorthernBobwhite_SimpleDeNovo_contig_305323	gi|358485511|ref|NC_006088.3_GGA1|	87.43	1058	93	9	24	1053	4326452	4327497	0	1305	1	S
NorthernBobwhite_SimpleDeNovo_contig_349001	gi|358485511|ref|NC_006088.3_GGA1|	86.53	438	45	3	3	437	4328193	4328619	7e-147	524	1	S
NorthernBobwhite_SimpleDeNovo_contig_193930	gi|358485511|ref|NC_006088.3_GGA1|	89.85	2227	168	13	10	2203	4328823	4331024	0	2991	1	S
NorthernBobwhite_SimpleDeNovo_contig_55267	gi|358485511|ref|NC_006088.3_GGA1|	88.94	7588	642	39	9291	16720	4338644	4331096	0	9903	110	M
NorthernBobwhite_SimpleDeNovo_contig_233258	gi|358485511|ref|NC_006088.3_GGA1|	81.66	398	59	5	1	393	4348086	4348474	2e-103	379	1	S
NorthernBobwhite_SimpleDeNovo_contig_44871	gi|358485511|ref|NC_006088.3_GGA1|	87.71	4143	350	38	1	4034	4352778	4348686	0	5149	1	S
NorthernBobwhite_SimpleDeNovo_contig_44872	gi|358485511|ref|NC_006088.3_GGA1|	84.4	2032	200	22	1712	3643	4354612	4356626	0	2242	3	S
NorthernBobwhite_SimpleDeNovo_contig_125475	gi|358485511|ref|NC_006088.3_GGA1|	87.93	1533	158	10	420	1939	4357524	4359042	0	1911	1206	M
NorthernBobwhite_SimpleDeNovo_contig_1128	gi|358485511|ref|NC_006088.3_GGA1|	88.47	6565	527	43	3	6456	4359595	4366040	0	8441	1	S
NorthernBobwhite_SimpleDeNovo_contig_353363	gi|358485511|ref|NC_006088.3_GGA1|	83.33	342	41	4	1	326	4366015	4366356	1e-96	356	1	S
NorthernBobwhite_SimpleDeNovo_contig_286063	gi|358485511|ref|NC_006088.3_GGA1|	81.52	341	47	4	8	332	4366356	4366016	7e-88	327	1	S
NorthernBobwhite_SimpleDeNovo_contig_45820	gi|358485511|ref|NC_006088.3_GGA1|	86.88	1601	175	11	2350	3926	4367929	4366340	0	1923	12	M
NorthernBobwhite_SimpleDeNovo_contig_374187	gi|358485511|ref|NC_006088.3_GGA1|	96	25	1	0	224	248	4369572	4369548	0.13	41	14	M
NorthernBobwhite_SimpleDeNovo_contig_320320	gi|358485511|ref|NC_006088.3_GGA1|	83.52	449	74	0	1	449	4370345	4370793	9e-133	477	1	S
NorthernBobwhite_SimpleDeNovo_contig_19797	gi|358485511|ref|NC_006088.3_GGA1|	87.76	4886	404	32	9	4731	4370782	4375636	0	6147	1	S
NorthernBobwhite_SimpleDeNovo_contig_180503	gi|358485511|ref|NC_006088.3_GGA1|	83.3	455	76	0	1	455	4370799	4370345	3e-133	479	1	S
NorthernBobwhite_SimpleDeNovo_contig_219600	gi|358485511|ref|NC_006088.3_GGA1|	86.74	3792	378	30	1	3735	4375704	4379427	0	4549	1	S
NorthernBobwhite_SimpleDeNovo_contig_274882	gi|358485511|ref|NC_006088.3_GGA1|	80.7	57	6	1	1079	1130	4378654	4378598	0.0002	53.6	45	M
NorthernBobwhite_SimpleDeNovo_contig_229674	gi|358485511|ref|NC_006088.3_GGA1|	86.27	488	53	7	1	481	4379447	4379927	1e-157	560	1	S
NorthernBobwhite_SimpleDeNovo_contig_167300	gi|358485511|ref|NC_006088.3_GGA1|	86.49	1503	167	10	1042	2514	4383165	4381669	0	1783	3	S
NorthernBobwhite_SimpleDeNovo_contig_167301	gi|358485511|ref|NC_006088.3_GGA1|	82.08	1194	153	15	1	1163	4384765	4385928	0	1177	775	M
NorthernBobwhite_SimpleDeNovo_contig_229407	gi|358485511|ref|NC_006088.3_GGA1|	88.73	843	76	2	1	832	4386510	4387344	0	1101	1	S
NorthernBobwhite_SimpleDeNovo_contig_282286	gi|358485511|ref|NC_006088.3_GGA1|	86.26	393	45	3	1	388	4386535	4386147	6e-128	461	1	S
NorthernBobwhite_SimpleDeNovo_contig_282287	gi|358485511|ref|NC_006088.3_GGA1|	83.12	391	46	4	1	373	4386535	4386147	3e-112	408	1	S
NorthernBobwhite_SimpleDeNovo_contig_25123	gi|358485511|ref|NC_006088.3_GGA1|	87.01	7398	712	53	388	7614	4389440	4396759	0	8994	3506	M
NorthernBobwhite_SimpleDeNovo_contig_357495	gi|358485511|ref|NC_006088.3_GGA1|	88.57	35	4	0	67	101	4393205	4393239	0.003	46.4	168	M
NorthernBobwhite_SimpleDeNovo_contig_215758	gi|358485511|ref|NC_006088.3_GGA1|	90.43	345	31	1	1	345	4400313	4400655	3e-131	471	1	S
NorthernBobwhite_SimpleDeNovo_contig_258502	gi|358485511|ref|NC_006088.3_GGA1|	94.54	659	29	4	1	653	4400330	4399673	0	1014	1	S
NorthernBobwhite_SimpleDeNovo_contig_67790	gi|358485511|ref|NC_006088.3_GGA1|	89.76	4512	328	31	1	4424	4400858	4405323	0	6035	1	S
NorthernBobwhite_SimpleDeNovo_contig_356994	gi|358485511|ref|NC_006088.3_GGA1|	82.22	45	8	0	664	708	4405705	4405749	0.009	46.4	10	M
NorthernBobwhite_SimpleDeNovo_contig_40910	gi|358485511|ref|NC_006088.3_GGA1|	86.89	61	6	1	7069	7129	4405705	4405763	2e-09	71.6	101	M
NorthernBobwhite_SimpleDeNovo_contig_201559	gi|358485511|ref|NC_006088.3_GGA1|	79.37	63	11	1	179	239	4405710	4405772	3e-05	53.6	73	M
NorthernBobwhite_SimpleDeNovo_contig_374010	gi|358485511|ref|NC_006088.3_GGA1|	87.23	47	5	1	1	47	4405744	4405699	1e-05	55.4	48	M
NorthernBobwhite_SimpleDeNovo_contig_186968	gi|358485511|ref|NC_006088.3_GGA1|	92.86	42	3	0	2	43	4405749	4405708	1e-06	62.6	233	M
NorthernBobwhite_SimpleDeNovo_contig_334022	gi|358485511|ref|NC_006088.3_GGA1|	77.94	68	8	3	34	101	4405758	4405698	0.001	48.2	27	M
NorthernBobwhite_SimpleDeNovo_contig_269241	gi|358485511|ref|NC_006088.3_GGA1|	91.3	46	4	0	29	74	4405761	4405716	3e-08	66.2	572	M
NorthernBobwhite_SimpleDeNovo_contig_306269	gi|358485511|ref|NC_006088.3_GGA1|	80.43	46	9	0	1052	1097	4405764	4405719	0.16	42.8	30	M
NorthernBobwhite_SimpleDeNovo_contig_220409	gi|358485511|ref|NC_006088.3_GGA1|	86.02	1695	165	13	1	1678	4407378	4405739	0	1995	1	S
NorthernBobwhite_SimpleDeNovo_contig_263551	gi|358485511|ref|NC_006088.3_GGA1|	78.15	444	64	4	32	445	4407793	4407353	2e-102	376	1	S
NorthernBobwhite_SimpleDeNovo_contig_294014	gi|358485511|ref|NC_006088.3_GGA1|	78.83	444	61	5	31	444	4407793	4407353	4e-105	385	1	S
NorthernBobwhite_SimpleDeNovo_contig_64720	gi|358485511|ref|NC_006088.3_GGA1|	85.47	1548	173	13	133	1652	4409550	4408027	0	1766	1	S
NorthernBobwhite_SimpleDeNovo_contig_36996	gi|358485511|ref|NC_006088.3_GGA1|	85.86	6611	736	58	2618	9115	4411818	4418342	0	7625	7614	M
NorthernBobwhite_SimpleDeNovo_contig_204425	gi|358485511|ref|NC_006088.3_GGA1|	84.06	1763	207	12	195	1899	4423913	4425659	0	1925	1	S
NorthernBobwhite_SimpleDeNovo_contig_167413	gi|358485511|ref|NC_006088.3_GGA1|	84.88	688	98	4	3	685	4426483	4425797	0	760	1	S
NorthernBobwhite_SimpleDeNovo_contig_136709	gi|358485511|ref|NC_006088.3_GGA1|	86.14	2049	200	23	1	2001	4428913	4426901	0	2387	1	S
NorthernBobwhite_SimpleDeNovo_contig_59009	gi|358485511|ref|NC_006088.3_GGA1|	84.42	8042	861	71	52	7850	4436846	4428954	0	8888	1209	M
NorthernBobwhite_SimpleDeNovo_contig_80856	gi|358485511|ref|NC_006088.3_GGA1|	85.16	15851	1768	137	1	15504	4438630	4454243	0	17890	929	M
NorthernBobwhite_SimpleDeNovo_contig_73433	gi|358485511|ref|NC_006088.3_GGA1|	81.5	3660	459	43	48	3577	4457030	4460601	0	3559	4	M
NorthernBobwhite_SimpleDeNovo_contig_281027	gi|358485511|ref|NC_006088.3_GGA1|	77.72	395	35	3	1	344	4464065	4463673	7e-95	351	1	S
NorthernBobwhite_SimpleDeNovo_contig_182786	gi|358485511|ref|NC_006088.3_GGA1|	85.39	1862	183	17	4	1810	4464184	4466011	0	2136	1	S
NorthernBobwhite_SimpleDeNovo_contig_315352	gi|358485511|ref|NC_006088.3_GGA1|	68.78	221	53	9	1266	1478	4466361	4466573	3e-07	62.6	98	M
NorthernBobwhite_SimpleDeNovo_contig_277800	gi|358485511|ref|NC_006088.3_GGA1|	82.76	1137	141	15	142	1239	4466473	4467593	0	1150	1	S
NorthernBobwhite_SimpleDeNovo_contig_350000	gi|358485511|ref|NC_006088.3_GGA1|	88.18	440	46	2	1	437	4467838	4468274	1e-156	556	1	S
NorthernBobwhite_SimpleDeNovo_contig_89235	gi|358485511|ref|NC_006088.3_GGA1|	85.24	4491	438	43	2230	6580	4470359	4474764	0	5119	830	M
NorthernBobwhite_SimpleDeNovo_contig_60974	gi|358485511|ref|NC_006088.3_GGA1|	82.23	12166	1413	144	1	11689	4477341	4489234	0	12220	52	M
NorthernBobwhite_SimpleDeNovo_contig_312755	gi|358485511|ref|NC_006088.3_GGA1|	79.71	69	10	3	200	266	4486935	4486869	0.0003	51.8	120	M
NorthernBobwhite_SimpleDeNovo_contig_262458	gi|358485511|ref|NC_006088.3_GGA1|	93.55	31	2	0	405	435	4487345	4487315	0.001	48.2	24	M
NorthernBobwhite_SimpleDeNovo_contig_15740	gi|358485511|ref|NC_006088.3_GGA1|	87.64	2289	212	18	1	2225	4498461	4496180	0	2836	2	M
NorthernBobwhite_SimpleDeNovo_contig_15741	gi|358485511|ref|NC_006088.3_GGA1|	85.41	6532	764	51	262	6693	4499083	4505525	0	7423	4	S
NorthernBobwhite_SimpleDeNovo_contig_357772	gi|358485511|ref|NC_006088.3_GGA1|	96.55	29	1	0	1	29	4501139	4501167	0.004	48.2	80	M
NorthernBobwhite_SimpleDeNovo_contig_57440	gi|358485511|ref|NC_006088.3_GGA1|	87.5	5745	509	51	5003	10638	4513350	4507706	0	7083	4077	M
NorthernBobwhite_SimpleDeNovo_contig_300199	gi|358485511|ref|NC_006088.3_GGA1|	96.15	26	1	0	529	554	4523243	4523268	0.14	42.8	47	M
NorthernBobwhite_SimpleDeNovo_contig_93721	gi|358485511|ref|NC_006088.3_GGA1|	88.06	5126	439	36	1	5020	4523842	4518784	0	6478	1	S
NorthernBobwhite_SimpleDeNovo_contig_93627	gi|358485511|ref|NC_006088.3_GGA1|	89.86	3550	288	13	454	3957	4527544	4524021	0	4785	2	S
NorthernBobwhite_SimpleDeNovo_contig_182829	gi|358485511|ref|NC_006088.3_GGA1|	87.67	1411	135	9	1220	2602	4529869	4528470	0	1755	2	S
NorthernBobwhite_SimpleDeNovo_contig_18246	gi|358485511|ref|NC_006088.3_GGA1|	87.34	8913	796	70	8169	16908	4540476	4531723	0	10970	3513	M
NorthernBobwhite_SimpleDeNovo_contig_253216	gi|358485511|ref|NC_006088.3_GGA1|	87.27	1665	163	17	1	1634	4552125	4550479	0	2015	1	S
NorthernBobwhite_SimpleDeNovo_contig_140652	gi|358485511|ref|NC_006088.3_GGA1|	85.16	2709	246	25	435	3079	4554931	4552315	0	3101	3	M
NorthernBobwhite_SimpleDeNovo_contig_291491	gi|358485511|ref|NC_006088.3_GGA1|	89.43	2071	187	8	1	2059	4555378	4557428	0	2740	2	M
NorthernBobwhite_SimpleDeNovo_contig_258278	gi|358485511|ref|NC_006088.3_GGA1|	87.47	415	45	4	1	408	4557632	4558046	2e-140	502	1	S
NorthernBobwhite_SimpleDeNovo_contig_49895	gi|358485511|ref|NC_006088.3_GGA1|	87.86	4532	373	34	1	4415	4565574	4561103	0	5699	2	S
NorthernBobwhite_SimpleDeNovo_contig_13128	gi|358485511|ref|NC_006088.3_GGA1|	85.98	4830	445	42	11957	16687	4578192	4582888	0	5678	5842	M
NorthernBobwhite_SimpleDeNovo_contig_153705	gi|358485511|ref|NC_006088.3_GGA1|	83.23	3959	525	42	1609	5489	4593009	4589112	0	4082	1786	M
NorthernBobwhite_SimpleDeNovo_contig_87912	gi|358485511|ref|NC_006088.3_GGA1|	84.82	5486	605	53	179	5542	4594482	4599861	0	6105	1	S
NorthernBobwhite_SimpleDeNovo_contig_150752	gi|358485511|ref|NC_006088.3_GGA1|	84.24	4335	504	45	945	5163	4601590	4605861	0	4697	1032	M
NorthernBobwhite_SimpleDeNovo_contig_94303	gi|358485511|ref|NC_006088.3_GGA1|	87.13	3622	358	22	314	3849	4610428	4614027	0	4430	358	M
NorthernBobwhite_SimpleDeNovo_contig_261527	gi|358485511|ref|NC_006088.3_GGA1|	84.71	255	38	1	89	342	4614507	4614761	1e-73	280	377	M
NorthernBobwhite_SimpleDeNovo_contig_256087	gi|358485511|ref|NC_006088.3_GGA1|	78.79	613	90	5	84	679	4614991	4615580	2e-149	533	127	M
NorthernBobwhite_SimpleDeNovo_contig_212480	gi|358485511|ref|NC_006088.3_GGA1|	91.63	2018	121	13	1	1983	4617510	4615506	0	2863	1	S
NorthernBobwhite_SimpleDeNovo_contig_43893	gi|358485511|ref|NC_006088.3_GGA1|	84.72	386	42	2	1	370	4618044	4617660	6e-121	437	1	S
NorthernBobwhite_SimpleDeNovo_contig_251827	gi|358485511|ref|NC_006088.3_GGA1|	82.91	357	49	1	1	345	4618182	4618538	2e-102	376	4	S
NorthernBobwhite_SimpleDeNovo_contig_194462	gi|358485511|ref|NC_006088.3_GGA1|	87.98	1955	195	12	7	1924	4620899	4622850	0	2448	1	S
NorthernBobwhite_SimpleDeNovo_contig_120490	gi|358485511|ref|NC_006088.3_GGA1|	90.75	1016	90	1	14	1025	4620905	4619890	0	1407	588	M
NorthernBobwhite_SimpleDeNovo_contig_126120	gi|358485511|ref|NC_006088.3_GGA1|	88.89	36	4	0	1958	1993	4623525	4623490	0.013	48.2	15	M
NorthernBobwhite_SimpleDeNovo_contig_344646	gi|358485511|ref|NC_006088.3_GGA1|	83.51	643	83	6	1	631	4623577	4622946	0	675	1	S
NorthernBobwhite_SimpleDeNovo_contig_141814	gi|358485511|ref|NC_006088.3_GGA1|	83.56	2768	367	21	1	2709	4626834	4624096	0	2926	56	M
NorthernBobwhite_SimpleDeNovo_contig_141815	gi|358485511|ref|NC_006088.3_GGA1|	82	2155	246	26	1341	3409	4628291	4630389	0	2149	3	S
NorthernBobwhite_SimpleDeNovo_contig_288951	gi|358485511|ref|NC_006088.3_GGA1|	87.68	414	42	3	60	468	4630605	4631014	4e-143	511	1	S
NorthernBobwhite_SimpleDeNovo_contig_313920	gi|358485511|ref|NC_006088.3_GGA1|	86.96	644	71	3	1	634	4631014	4630374	0	782	1	S
NorthernBobwhite_SimpleDeNovo_contig_301690	gi|358485511|ref|NC_006088.3_GGA1|	84.91	1140	94	11	23	1108	4632113	4630998	0	1301	1	S
NorthernBobwhite_SimpleDeNovo_contig_98306	gi|358485511|ref|NC_006088.3_GGA1|	85.85	4510	465	45	1	4402	4636768	4632324	0	5211	218	M
NorthernBobwhite_SimpleDeNovo_contig_129228	gi|358485511|ref|NC_006088.3_GGA1|	84.18	1997	231	18	1	1940	4639737	4637769	0	2172	2	S
NorthernBobwhite_SimpleDeNovo_contig_336640	gi|358485511|ref|NC_006088.3_GGA1|	84.48	612	68	5	1	589	4640602	4639995	0	677	1	S
NorthernBobwhite_SimpleDeNovo_contig_264227	gi|358485511|ref|NC_006088.3_GGA1|	80.95	63	10	2	1	61	4640721	4640783	6e-05	53.6	59	M
NorthernBobwhite_SimpleDeNovo_contig_319006	gi|358485511|ref|NC_006088.3_GGA1|	77.19	57	13	0	165	221	4640761	4640705	0.041	44.6	36	M
NorthernBobwhite_SimpleDeNovo_contig_371825	gi|358485511|ref|NC_006088.3_GGA1|	71.07	121	24	5	144	254	4640791	4640672	0.001	48.2	170	M
NorthernBobwhite_SimpleDeNovo_contig_98342	gi|358485511|ref|NC_006088.3_GGA1|	85.63	3208	330	31	197	3331	4641758	4644907	0	3685	2	S
NorthernBobwhite_SimpleDeNovo_contig_163500	gi|358485511|ref|NC_006088.3_GGA1|	85.26	2714	280	30	731	3375	4645328	4647990	0	3065	6	M
NorthernBobwhite_SimpleDeNovo_contig_344505	gi|358485511|ref|NC_006088.3_GGA1|	89.66	29	3	0	229	257	4646532	4646560	0.56	39.2	48	M
NorthernBobwhite_SimpleDeNovo_contig_261536	gi|358485511|ref|NC_006088.3_GGA1|	84.94	6442	757	45	84	6396	4657146	4650789	0	7234	2	M
NorthernBobwhite_SimpleDeNovo_contig_157360	gi|358485511|ref|NC_006088.3_GGA1|	88.77	7875	672	59	1	7762	4665305	4657530	0	10140	1	S
NorthernBobwhite_SimpleDeNovo_contig_202452	gi|358485511|ref|NC_006088.3_GGA1|	84.75	3265	382	27	1853	5014	4667705	4670956	0	3626	1715	M
NorthernBobwhite_SimpleDeNovo_contig_37493	gi|358485511|ref|NC_006088.3_GGA1|	84.37	710	78	5	604	1280	4672896	4672187	0	787	30	M
NorthernBobwhite_SimpleDeNovo_contig_314976	gi|358485511|ref|NC_006088.3_GGA1|	85.12	598	68	10	9	588	4673545	4674139	0	652	1	S
NorthernBobwhite_SimpleDeNovo_contig_130179	gi|358485511|ref|NC_006088.3_GGA1|	83.04	2241	252	23	1813	3955	4676472	4674262	0	2340	2267	M
NorthernBobwhite_SimpleDeNovo_contig_85142	gi|358485511|ref|NC_006088.3_GGA1|	87.56	9207	859	74	1833	10863	4680670	4689766	0	11370	56	M
NorthernBobwhite_SimpleDeNovo_contig_79048	gi|358485511|ref|NC_006088.3_GGA1|	83.55	4122	503	46	27	4059	4695412	4691377	0	4327	2	S
NorthernBobwhite_SimpleDeNovo_contig_254855	gi|358485511|ref|NC_006088.3_GGA1|	72.96	196	44	6	1	187	4695615	4695420	2e-18	96.9	1	S
NorthernBobwhite_SimpleDeNovo_contig_370514	gi|358485511|ref|NC_006088.3_GGA1|	84.57	324	47	2	2	325	4696290	4696610	2e-95	352	1	S
NorthernBobwhite_SimpleDeNovo_contig_312396	gi|358485511|ref|NC_006088.3_GGA1|	84.21	304	45	2	19	319	4697655	4697352	3e-87	325	1	S
NorthernBobwhite_SimpleDeNovo_contig_46400	gi|358485511|ref|NC_006088.3_GGA1|	86.33	3175	338	26	2	3119	4698628	4701763	0	3739	2	S
NorthernBobwhite_SimpleDeNovo_contig_102216	gi|358485511|ref|NC_006088.3_GGA1|	81.77	1651	157	22	1	1602	4708892	4707337	0	1651	2	S
NorthernBobwhite_SimpleDeNovo_contig_204288	gi|358485511|ref|NC_006088.3_GGA1|	85	800	105	9	198	984	4709188	4709985	0	875	2	S
NorthernBobwhite_SimpleDeNovo_contig_337759	gi|358485511|ref|NC_006088.3_GGA1|	80	70	12	1	1131	1200	4709994	4710061	7e-07	60.8	671	M
NorthernBobwhite_SimpleDeNovo_contig_10020	gi|358485511|ref|NC_006088.3_GGA1|	85.4	12722	1341	133	12695	25052	4723244	4710676	0	14430	10514	M
NorthernBobwhite_SimpleDeNovo_contig_113907	gi|358485511|ref|NC_006088.3_GGA1|	82.35	827	115	12	360	1167	4738123	4738937	0	807	2	S
NorthernBobwhite_SimpleDeNovo_contig_180171	gi|358485511|ref|NC_006088.3_GGA1|	75.6	623	73	15	1	560	4739518	4738912	2e-122	443	405	M
NorthernBobwhite_SimpleDeNovo_contig_340346	gi|358485511|ref|NC_006088.3_GGA1|	76.73	623	70	14	1	564	4739518	4738912	4e-132	475	902	M
NorthernBobwhite_SimpleDeNovo_contig_292758	gi|358485511|ref|NC_006088.3_GGA1|	80	585	70	6	1	544	4740071	4739493	9e-153	544	1	S
NorthernBobwhite_SimpleDeNovo_contig_140689	gi|358485511|ref|NC_006088.3_GGA1|	83.87	1705	156	20	1392	3014	4741874	4740207	0	1853	2	S
NorthernBobwhite_SimpleDeNovo_contig_353586	gi|358485511|ref|NC_006088.3_GGA1|	84.26	305	39	4	2	301	4743937	4743637	8e-87	324	1	S
NorthernBobwhite_SimpleDeNovo_contig_353585	gi|358485511|ref|NC_006088.3_GGA1|	84.49	303	41	2	2	300	4743937	4743637	5e-89	331	1	S
NorthernBobwhite_SimpleDeNovo_contig_77481	gi|358485511|ref|NC_006088.3_GGA1|	86.56	3185	306	26	339	3430	4756699	4753544	0	3808	241	M
NorthernBobwhite_SimpleDeNovo_contig_130394	gi|358485511|ref|NC_006088.3_GGA1|	84.42	3973	455	45	723	4601	4765621	4761719	0	4320	3	S
NorthernBobwhite_SimpleDeNovo_contig_27161	gi|358485511|ref|NC_006088.3_GGA1|	83.82	1428	169	15	175	1556	4767589	4766178	0	1523	1223	M
NorthernBobwhite_SimpleDeNovo_contig_27160	gi|358485511|ref|NC_006088.3_GGA1|	83.56	16505	1865	177	3136	19111	4770775	4786959	0	17500	2	S
NorthernBobwhite_SimpleDeNovo_contig_227721	gi|358485511|ref|NC_006088.3_GGA1|	84.95	2505	247	21	1	2390	4787140	4789629	0	2841	1	S
NorthernBobwhite_SimpleDeNovo_contig_121865	gi|358485511|ref|NC_006088.3_GGA1|	84.41	8929	932	101	2754	11335	4798529	4789714	0	9786	23	M
NorthernBobwhite_SimpleDeNovo_contig_333083	gi|358485511|ref|NC_006088.3_GGA1|	76.05	334	45	6	1	314	4801547	4801865	2e-63	246	1	S
NorthernBobwhite_SimpleDeNovo_contig_205867	gi|358485511|ref|NC_006088.3_GGA1|	85.68	3275	352	30	1	3187	4802079	4805324	0	3763	43	M
NorthernBobwhite_SimpleDeNovo_contig_273581	gi|358485511|ref|NC_006088.3_GGA1|	86.97	1036	107	7	1	1012	4805692	4806723	0	1260	1	S
NorthernBobwhite_SimpleDeNovo_contig_254355	gi|358485511|ref|NC_006088.3_GGA1|	91.67	444	25	4	1	436	4806697	4807136	7e-178	627	1	S
NorthernBobwhite_SimpleDeNovo_contig_73712	gi|358485511|ref|NC_006088.3_GGA1|	87.08	9012	844	90	1	8788	4807132	4816047	0	10890	1	S
NorthernBobwhite_SimpleDeNovo_contig_133963	gi|358485511|ref|NC_006088.3_GGA1|	92.39	2155	129	11	1	2143	4818446	4816315	0	3130	1	S
NorthernBobwhite_SimpleDeNovo_contig_45813	gi|358485511|ref|NC_006088.3_GGA1|	87.22	6159	623	43	1	6065	4818605	4824693	0	7514	4	S
NorthernBobwhite_SimpleDeNovo_contig_320539	gi|358485511|ref|NC_006088.3_GGA1|	85	40	6	0	283	322	4831182	4831221	0.005	46.4	1565	M
NorthernBobwhite_SimpleDeNovo_contig_371828	gi|358485511|ref|NC_006088.3_GGA1|	84.21	38	6	0	332	369	4834982	4834945	0.069	42.8	14	M
NorthernBobwhite_SimpleDeNovo_contig_65499	gi|358485511|ref|NC_006088.3_GGA1|	75.83	906	117	16	44	908	4836082	4836926	0	666	1	S
NorthernBobwhite_SimpleDeNovo_contig_31845	gi|358485511|ref|NC_006088.3_GGA1|	87.21	2033	198	19	256	2274	4837023	4839007	0	2464	1	S
NorthernBobwhite_SimpleDeNovo_contig_174218	gi|358485511|ref|NC_006088.3_GGA1|	80.2	904	109	13	1	880	4840476	4839619	0	829	1	S
NorthernBobwhite_SimpleDeNovo_contig_31001	gi|358485511|ref|NC_006088.3_GGA1|	84.96	5307	589	52	1	5194	4840991	4846201	0	5927	882	M
NorthernBobwhite_SimpleDeNovo_contig_142760	gi|358485511|ref|NC_006088.3_GGA1|	86.04	2127	207	24	1	2063	4854327	4852227	0	2470	1	S
NorthernBobwhite_SimpleDeNovo_contig_58684	gi|358485511|ref|NC_006088.3_GGA1|	85.03	6311	660	72	1	6143	4854370	4860563	0	7054	1	S
NorthernBobwhite_SimpleDeNovo_contig_50038	gi|358485511|ref|NC_006088.3_GGA1|	84.53	3388	402	39	1750	5058	4863927	4860583	0	3681	2	S
NorthernBobwhite_SimpleDeNovo_contig_275255	gi|358485511|ref|NC_006088.3_GGA1|	83.51	1213	128	12	95	1280	4866252	4867419	0	1297	925	M
NorthernBobwhite_SimpleDeNovo_contig_181161	gi|358485511|ref|NC_006088.3_GGA1|	84.14	6407	722	53	37	6283	4867549	4873821	0	7000	58	M
NorthernBobwhite_SimpleDeNovo_contig_61101	gi|358485511|ref|NC_006088.3_GGA1|	90.39	2872	192	18	1	2790	4877127	4874258	0	3930	123	M
NorthernBobwhite_SimpleDeNovo_contig_132773	gi|358485511|ref|NC_006088.3_GGA1|	85.61	6184	629	54	13	6028	4877160	4883250	0	7131	1	S
NorthernBobwhite_SimpleDeNovo_contig_251352	gi|358485511|ref|NC_006088.3_GGA1|	88.8	1714	134	10	2	1696	4883322	4884996	0	2233	1	S
NorthernBobwhite_SimpleDeNovo_contig_92681	gi|358485511|ref|NC_006088.3_GGA1|	82.89	2951	344	32	20	2858	4887940	4885039	0	3047	1	S
NorthernBobwhite_SimpleDeNovo_contig_5602	gi|358485511|ref|NC_006088.3_GGA1|	86.88	4369	439	36	1	4305	4887992	4892290	0	5254	2	S
NorthernBobwhite_SimpleDeNovo_contig_166398	gi|358485511|ref|NC_006088.3_GGA1|	82.24	2602	233	34	1	2430	4895865	4893321	0	2663	1	S
NorthernBobwhite_SimpleDeNovo_contig_249494	gi|358485511|ref|NC_006088.3_GGA1|	84.35	4320	494	41	2167	6381	4898334	4902576	0	4722	2	S
NorthernBobwhite_SimpleDeNovo_contig_147899	gi|358485511|ref|NC_006088.3_GGA1|	79.66	2626	347	33	1	2514	4903187	4905737	0	2349	1	S
NorthernBobwhite_SimpleDeNovo_contig_147900	gi|358485511|ref|NC_006088.3_GGA1|	73.99	419	55	3	1	370	4903212	4902799	1e-79	300	1	S
NorthernBobwhite_SimpleDeNovo_contig_147901	gi|358485511|ref|NC_006088.3_GGA1|	78.87	620	77	3	1	571	4903212	4902598	1e-158	563	1	S
NorthernBobwhite_SimpleDeNovo_contig_244350	gi|358485511|ref|NC_006088.3_GGA1|	77.87	750	99	14	2	697	4906636	4905900	5e-170	601	1	S
NorthernBobwhite_SimpleDeNovo_contig_26537	gi|358485511|ref|NC_006088.3_GGA1|	83.34	3854	514	37	1225	5031	4907408	4911180	0	4004	3510	M
NorthernBobwhite_SimpleDeNovo_contig_85818	gi|358485511|ref|NC_006088.3_GGA1|	78.95	1701	232	17	18	1624	4918310	4916642	0	1490	107	M
NorthernBobwhite_SimpleDeNovo_contig_12740	gi|358485511|ref|NC_006088.3_GGA1|	81.04	5274	672	60	1	5119	4925081	4919981	0	5029	35	M
NorthernBobwhite_SimpleDeNovo_contig_73869	gi|358485511|ref|NC_006088.3_GGA1|	80.87	4590	553	58	11	4372	4929555	4925063	0	4351	1	S
NorthernBobwhite_SimpleDeNovo_contig_107566	gi|358485511|ref|NC_006088.3_GGA1|	90.8	337	31	0	20	356	4929697	4930033	6e-130	468	2	S
NorthernBobwhite_SimpleDeNovo_contig_322239	gi|358485511|ref|NC_006088.3_GGA1|	78.08	479	91	5	123	589	4930857	4931333	7e-104	381	1578	M
NorthernBobwhite_SimpleDeNovo_contig_261006	gi|358485511|ref|NC_006088.3_GGA1|	77.02	470	95	5	105	562	4930865	4931333	1e-94	351	1167	M
NorthernBobwhite_SimpleDeNovo_contig_73870	gi|358485511|ref|NC_006088.3_GGA1|	81.87	342	41	4	31	352	4932194	4932534	4e-91	338	1	S
NorthernBobwhite_SimpleDeNovo_contig_92112	gi|358485511|ref|NC_006088.3_GGA1|	81.13	4108	527	54	542	4526	4933150	4937132	0	3894	4	S
NorthernBobwhite_SimpleDeNovo_contig_276262	gi|358485511|ref|NC_006088.3_GGA1|	86.63	793	80	3	5	771	4939408	4938616	0	962	2	S
NorthernBobwhite_SimpleDeNovo_contig_254157	gi|358485511|ref|NC_006088.3_GGA1|	86.89	366	42	3	1	360	4940252	4939887	2e-120	435	1	S
NorthernBobwhite_SimpleDeNovo_contig_339656	gi|358485511|ref|NC_006088.3_GGA1|	73.96	192	32	10	6	189	4940495	4940676	8e-17	93.3	7	M
NorthernBobwhite_SimpleDeNovo_contig_47327	gi|358485511|ref|NC_006088.3_GGA1|	82.54	4199	498	44	160	4208	4944842	4940729	0	4282	1	S
NorthernBobwhite_SimpleDeNovo_contig_16761	gi|358485511|ref|NC_006088.3_GGA1|	84.7	1516	181	13	6	1488	4947287	4948784	0	1676	1	S
NorthernBobwhite_SimpleDeNovo_contig_287761	gi|358485511|ref|NC_006088.3_GGA1|	87.54	329	34	1	162	483	4949389	4949717	1e-112	410	1	S
NorthernBobwhite_SimpleDeNovo_contig_331089	gi|358485511|ref|NC_006088.3_GGA1|	85.41	329	31	2	333	644	4949389	4949717	2e-104	383	2	S
NorthernBobwhite_SimpleDeNovo_contig_275632	gi|358485511|ref|NC_006088.3_GGA1|	86.13	310	38	2	1	307	4949692	4949999	3e-98	361	1	S
NorthernBobwhite_SimpleDeNovo_contig_353146	gi|358485511|ref|NC_006088.3_GGA1|	85.53	864	115	5	2	858	4951009	4950149	0	982	1	S
NorthernBobwhite_SimpleDeNovo_contig_46373	gi|358485511|ref|NC_006088.3_GGA1|	85.15	4746	544	34	5449	10087	4957221	4952530	0	5373	4	S
NorthernBobwhite_SimpleDeNovo_contig_53657	gi|358485511|ref|NC_006088.3_GGA1|	78.8	1684	216	27	5	1635	4964304	4962709	0	1433	1	S
NorthernBobwhite_SimpleDeNovo_contig_2004	gi|358485511|ref|NC_006088.3_GGA1|	84.68	2135	234	27	1211	3291	4969842	4967747	0	2338	2799	M
NorthernBobwhite_SimpleDeNovo_contig_194704	gi|358485511|ref|NC_006088.3_GGA1|	92.31	26	2	0	44	69	4970115	4970140	0.52	39.2	7	M
NorthernBobwhite_SimpleDeNovo_contig_169583	gi|358485511|ref|NC_006088.3_GGA1|	82.47	776	96	11	2	741	4975859	4976630	0	773	1	S
NorthernBobwhite_SimpleDeNovo_contig_275614	gi|358485511|ref|NC_006088.3_GGA1|	83.37	493	61	5	2	479	4975859	4976345	1e-144	517	1	S
NorthernBobwhite_SimpleDeNovo_contig_169493	gi|358485511|ref|NC_006088.3_GGA1|	84.46	3514	437	36	3	3460	4975881	4972421	0	3811	1	S
NorthernBobwhite_SimpleDeNovo_contig_359236	gi|358485511|ref|NC_006088.3_GGA1|	70.57	350	45	6	1	338	4977113	4976810	4e-47	192	1	S
NorthernBobwhite_SimpleDeNovo_contig_341634	gi|358485511|ref|NC_006088.3_GGA1|	81.07	486	73	3	9	475	4977429	4977914	2e-129	466	1	S
NorthernBobwhite_SimpleDeNovo_contig_354122	gi|358485511|ref|NC_006088.3_GGA1|	77.78	360	48	4	1	329	4977446	4977088	1e-79	300	1	S
NorthernBobwhite_SimpleDeNovo_contig_354123	gi|358485511|ref|NC_006088.3_GGA1|	77.5	360	56	3	1	336	4977446	4977088	1e-77	293	1	S
NorthernBobwhite_SimpleDeNovo_contig_327973	gi|358485511|ref|NC_006088.3_GGA1|	75.49	506	73	8	1	459	4977889	4978390	1e-98	363	1	S
NorthernBobwhite_SimpleDeNovo_contig_268724	gi|358485511|ref|NC_006088.3_GGA1|	74.7	506	71	9	1	453	4977889	4978390	1e-93	347	1	S
NorthernBobwhite_SimpleDeNovo_contig_211859	gi|358485511|ref|NC_006088.3_GGA1|	84.26	4498	532	57	1	4410	4978562	4982971	0	4821	1	S
NorthernBobwhite_SimpleDeNovo_contig_67811	gi|358485511|ref|NC_006088.3_GGA1|	82.57	3156	362	30	834	3821	4987192	4984057	0	3247	3	S
NorthernBobwhite_SimpleDeNovo_contig_67810	gi|358485511|ref|NC_006088.3_GGA1|	82.71	1261	162	20	1	1224	4988641	4989882	0	1252	1	S
NorthernBobwhite_SimpleDeNovo_contig_49461	gi|358485511|ref|NC_006088.3_GGA1|	82.88	2272	292	24	3885	6077	4992361	4990108	0	2324	535	M
[truncated: 372,272+ more rows]

## Sheet: Taeniopygia guttata3.2.4
Table S2-B NB1.0 Comparative Genome Aligment to Zebra Finch
Query	Hit/Subject Chromosome (Taeniopygia guttata 3.2.4 )	% Identity	Align Length	Mismatches	Gaps	q-start	q-end	hit-start	hit-end	evalue	bitscore	Total hits	Single or Multi Chromosome
NorthernBobwhite_SimpleDeNovo_contig_100045	gi|224381666|ref|NC_011462.1_TGU1|	69.16	856	197	24	3854	4692	40575435	40574630	4e-80	306	3407	M
NorthernBobwhite_SimpleDeNovo_contig_100091	gi|224381666|ref|NC_011462.1_TGU1|	87.8	41	5	0	335	375	86658036	86657996	0.0002	51.8	147	M
NorthernBobwhite_SimpleDeNovo_contig_100169	gi|224381666|ref|NC_011462.1_TGU1|	67.94	2714	571	63	6083	8660	34732014	34734564	0	958	7582	M
NorthernBobwhite_SimpleDeNovo_contig_100193	gi|224381666|ref|NC_011462.1_TGU1|	74.77	222	47	5	32	249	96457227	96457011	1e-28	134	23235	M
NorthernBobwhite_SimpleDeNovo_contig_100234	gi|224381666|ref|NC_011462.1_TGU1|	72.76	1762	379	28	188	1905	108120539	108122243	0	978	165	M
NorthernBobwhite_SimpleDeNovo_contig_100311	gi|224381666|ref|NC_011462.1_TGU1|	68.11	1543	406	29	4004	5505	89012695	89011198	7e-142	511	124	M
NorthernBobwhite_SimpleDeNovo_contig_100367	gi|224381666|ref|NC_011462.1_TGU1|	69.85	2123	467	38	4338	6355	42150788	42152842	0	928	8470	M
NorthernBobwhite_SimpleDeNovo_contig_100453	gi|224381666|ref|NC_011462.1_TGU1|	65.13	2294	464	74	1489	3567	69722565	69720393	1e-138	500	4720	M
NorthernBobwhite_SimpleDeNovo_contig_100456	gi|224381666|ref|NC_011462.1_TGU1|	64.96	1133	263	35	1214	2252	43268914	43270006	8e-54	217	7650	M
NorthernBobwhite_SimpleDeNovo_contig_1006	gi|224381666|ref|NC_011462.1_TGU1|	66.04	586	127	22	76	607	55263116	55262549	3e-26	125	56	M
NorthernBobwhite_SimpleDeNovo_contig_100739	gi|224381666|ref|NC_011462.1_TGU1|	72.05	1610	335	35	4207	5773	100528475	100526938	0	821	130	M
NorthernBobwhite_SimpleDeNovo_contig_100768	gi|224381666|ref|NC_011462.1_TGU1|	83.72	43	7	0	328	370	11296588	11296630	0.01	46.4	42	M
NorthernBobwhite_SimpleDeNovo_contig_100769	gi|224381666|ref|NC_011462.1_TGU1|	74.93	682	127	12	1870	2539	84935041	84935690	4e-122	444	6678	M
NorthernBobwhite_SimpleDeNovo_contig_100809	gi|224381666|ref|NC_011462.1_TGU1|	73.57	613	147	7	82	690	8878475	8877874	2e-96	358	119	M
NorthernBobwhite_SimpleDeNovo_contig_100898	gi|224381666|ref|NC_011462.1_TGU1|	69.08	1533	357	38	3772	5251	63025351	63023883	7e-157	562	9503	M
NorthernBobwhite_SimpleDeNovo_contig_100975	gi|224381666|ref|NC_011462.1_TGU1|	68.43	966	246	22	123	1053	35387616	35388557	1e-85	322	131	M
NorthernBobwhite_SimpleDeNovo_contig_101077	gi|224381666|ref|NC_011462.1_TGU1|	73.34	754	141	16	1	700	37679775	37679028	5e-120	435	137	M
NorthernBobwhite_SimpleDeNovo_contig_101109	gi|224381666|ref|NC_011462.1_TGU1|	72.18	2067	447	41	1153	3133	68832539	68834563	0	1067	222	M
NorthernBobwhite_SimpleDeNovo_contig_101155	gi|224381666|ref|NC_011462.1_TGU1|	68.26	2448	567	54	1808	4115	38659548	38661925	0	857	1526	M
NorthernBobwhite_SimpleDeNovo_contig_10123	gi|224381666|ref|NC_011462.1_TGU1|	71.22	2498	563	61	2505	4932	113442909	113440498	0	1130	821	M
NorthernBobwhite_SimpleDeNovo_contig_101241	gi|224381666|ref|NC_011462.1_TGU1|	78.05	934	142	18	6201	7078	61199158	61200084	0	737	300	M
NorthernBobwhite_SimpleDeNovo_contig_101315	gi|224381666|ref|NC_011462.1_TGU1|	69.76	496	116	13	301	792	28054312	28053847	4e-46	190	448	M
NorthernBobwhite_SimpleDeNovo_contig_101406	gi|224381666|ref|NC_011462.1_TGU1|	71.74	1320	241	29	96	1377	114310119	114308894	0	688	43538	M
NorthernBobwhite_SimpleDeNovo_contig_10143	gi|224381666|ref|NC_011462.1_TGU1|	75.5	2200	407	41	4677	6800	107678215	107676072	0	1472	19633	M
NorthernBobwhite_SimpleDeNovo_contig_101435	gi|224381666|ref|NC_011462.1_TGU1|	68.87	787	172	23	7	734	10270083	10270855	6e-72	277	32	M
NorthernBobwhite_SimpleDeNovo_contig_101436	gi|224381666|ref|NC_011462.1_TGU1|	82.98	47	6	1	263	309	36842716	36842760	0.004	46.4	196	M
NorthernBobwhite_SimpleDeNovo_contig_101616	gi|224381666|ref|NC_011462.1_TGU1|	74.08	1192	253	18	5832	7002	34898062	34896906	0	726	4234	M
NorthernBobwhite_SimpleDeNovo_contig_101726	gi|224381666|ref|NC_011462.1_TGU1|	68.05	579	140	19	67	628	118110047	118110597	3e-38	165	2542	M
NorthernBobwhite_SimpleDeNovo_contig_101906	gi|224381666|ref|NC_011462.1_TGU1|	74.17	2149	365	44	37	2068	52191288	52189213	0	1346	3783	M
NorthernBobwhite_SimpleDeNovo_contig_10193	gi|224381666|ref|NC_011462.1_TGU1|	74.73	819	148	22	47	830	91583360	91584154	1e-138	499	14947	M
NorthernBobwhite_SimpleDeNovo_contig_102041	gi|224381666|ref|NC_011462.1_TGU1|	73.51	1548	353	25	240	1764	86650585	86652098	0	883	1229	M
NorthernBobwhite_SimpleDeNovo_contig_102060	gi|224381666|ref|NC_011462.1_TGU1|	71.38	905	201	24	1479	2359	57290566	57289696	3e-111	408	331	M
NorthernBobwhite_SimpleDeNovo_contig_102207	gi|224381666|ref|NC_011462.1_TGU1|	68.33	4360	957	110	1425	5561	23731033	23735191	0	1523	274	M
NorthernBobwhite_SimpleDeNovo_contig_102231	gi|224381666|ref|NC_011462.1_TGU1|	73.7	1639	328	36	445	2015	11326276	11324673	0	944	82	M
NorthernBobwhite_SimpleDeNovo_contig_102290	gi|224381666|ref|NC_011462.1_TGU1|	67.06	2225	536	65	2393	4488	20534701	20536857	2e-166	592	3446	M
NorthernBobwhite_SimpleDeNovo_contig_10232	gi|224381666|ref|NC_011462.1_TGU1|	81.52	1483	221	16	4948	6419	79104639	79106079	0	1415	26375	M
NorthernBobwhite_SimpleDeNovo_contig_102386	gi|224381666|ref|NC_011462.1_TGU1|	71.01	683	158	15	756	1427	90003130	90003783	2e-80	307	394	M
NorthernBobwhite_SimpleDeNovo_contig_102398	gi|224381666|ref|NC_011462.1_TGU1|	73.3	2109	428	49	3317	5350	79614422	79616470	0	1166	5501	M
NorthernBobwhite_SimpleDeNovo_contig_102427	gi|224381666|ref|NC_011462.1_TGU1|	68.15	653	136	22	388	998	9263877	9263255	1e-50	206	13661	M
NorthernBobwhite_SimpleDeNovo_contig_102452	gi|224381666|ref|NC_011462.1_TGU1|	70.22	742	159	17	869	1586	8806509	8805806	2e-85	322	55	M
NorthernBobwhite_SimpleDeNovo_contig_102483	gi|224381666|ref|NC_011462.1_TGU1|	72.62	968	228	13	5706	6645	91352576	91351618	4e-146	526	18139	M
NorthernBobwhite_SimpleDeNovo_contig_102548	gi|224381666|ref|NC_011462.1_TGU1|	68.16	2808	656	78	410	3098	17947182	17949870	0	897	23767	M
NorthernBobwhite_SimpleDeNovo_contig_102674	gi|224381666|ref|NC_011462.1_TGU1|	86.76	68	9	0	118	185	56440850	56440783	5e-14	82.4	4912	M
NorthernBobwhite_SimpleDeNovo_contig_102759	gi|224381666|ref|NC_011462.1_TGU1|	75.94	719	151	9	3287	4002	72772786	72772087	1e-137	497	263	M
NorthernBobwhite_SimpleDeNovo_contig_10282	gi|224381666|ref|NC_011462.1_TGU1|	67.42	531	144	12	24	547	32390396	32389888	2e-34	150	31	M
NorthernBobwhite_SimpleDeNovo_contig_102998	gi|224381666|ref|NC_011462.1_TGU1|	67.65	2198	525	54	5005	7090	51381423	51383546	0	682	104	M
NorthernBobwhite_SimpleDeNovo_contig_103004	gi|224381666|ref|NC_011462.1_TGU1|	76.69	695	117	17	4330	5019	80859859	80860513	7e-135	488	10458	M
NorthernBobwhite_SimpleDeNovo_contig_103078	gi|224381666|ref|NC_011462.1_TGU1|	75.77	454	79	9	27	476	30070854	30070428	4e-82	311	2759	M
NorthernBobwhite_SimpleDeNovo_contig_103138	gi|224381666|ref|NC_011462.1_TGU1|	70.73	82	15	1	22	94	40857068	40857149	0.013	44.6	55	M
NorthernBobwhite_SimpleDeNovo_contig_103156	gi|224381666|ref|NC_011462.1_TGU1|	88.57	35	4	0	543	577	101285757	101285723	0.01	46.4	125	M
NorthernBobwhite_SimpleDeNovo_contig_103171	gi|224381666|ref|NC_011462.1_TGU1|	70.94	585	133	10	69	637	69025645	69025082	5e-72	277	116	M
NorthernBobwhite_SimpleDeNovo_contig_103279	gi|224381666|ref|NC_011462.1_TGU1|	77.72	1791	305	28	31	1770	36360969	36362716	0	1389	98	M
NorthernBobwhite_SimpleDeNovo_contig_103436	gi|224381666|ref|NC_011462.1_TGU1|	65.48	423	103	13	135	537	61435294	61434895	3e-14	86	474	M
NorthernBobwhite_SimpleDeNovo_contig_103510	gi|224381666|ref|NC_011462.1_TGU1|	73.41	643	101	12	2050	2661	37003961	37003358	9e-108	398	7581	M
NorthernBobwhite_SimpleDeNovo_contig_103605	gi|224381666|ref|NC_011462.1_TGU1|	81.28	625	93	9	2314	2917	67590002	67589381	3e-163	581	14293	M
NorthernBobwhite_SimpleDeNovo_contig_103610	gi|224381666|ref|NC_011462.1_TGU1|	64.27	431	111	14	3	400	102631880	102631460	1e-06	59	44	M
NorthernBobwhite_SimpleDeNovo_contig_103716	gi|224381666|ref|NC_011462.1_TGU1|	68.1	348	81	10	6	333	56507383	56507720	2e-21	109	1272	M
NorthernBobwhite_SimpleDeNovo_contig_103746	gi|224381666|ref|NC_011462.1_TGU1|	76.54	780	165	11	1818	2589	13894015	13894784	3e-153	549	53	M
NorthernBobwhite_SimpleDeNovo_contig_103803	gi|224381666|ref|NC_011462.1_TGU1|	74.88	1485	262	34	37	1446	69589043	69590491	0	944	47	M
NorthernBobwhite_SimpleDeNovo_contig_103953	gi|224381666|ref|NC_011462.1_TGU1|	65.92	666	163	16	196	817	76666365	76667010	4e-37	163	7614	M
NorthernBobwhite_SimpleDeNovo_contig_103964	gi|224381666|ref|NC_011462.1_TGU1|	71.08	370	73	9	2465	2814	98755044	98755399	3e-41	176	1858	M
NorthernBobwhite_SimpleDeNovo_contig_104076	gi|224381666|ref|NC_011462.1_TGU1|	76.56	768	140	11	75	809	64607188	64607948	2e-157	560	115	M
NorthernBobwhite_SimpleDeNovo_contig_104102	gi|224381666|ref|NC_011462.1_TGU1|	73.09	301	67	4	98	390	58946939	58946645	6e-41	172	33	M
NorthernBobwhite_SimpleDeNovo_contig_104190	gi|224381666|ref|NC_011462.1_TGU1|	75.18	4791	909	68	639	5238	49701911	49706612	0	3225	3104	M
NorthernBobwhite_SimpleDeNovo_contig_104198	gi|224381666|ref|NC_011462.1_TGU1|	70.87	1308	269	32	1	1225	78862782	78861504	6e-168	598	105	M
NorthernBobwhite_SimpleDeNovo_contig_104369	gi|224381666|ref|NC_011462.1_TGU1|	78	709	130	10	2595	3297	84795158	84795846	3e-155	554	13106	M
NorthernBobwhite_SimpleDeNovo_contig_104470	gi|224381666|ref|NC_011462.1_TGU1|	66.93	1415	348	34	558	1919	46247391	46248738	4e-108	398	33	M
NorthernBobwhite_SimpleDeNovo_contig_104473	gi|224381666|ref|NC_011462.1_TGU1|	78.33	923	159	17	5195	6090	74118090	74118998	0	724	10003	M
NorthernBobwhite_SimpleDeNovo_contig_104593	gi|224381666|ref|NC_011462.1_TGU1|	84.21	38	6	0	380	417	116745159	116745122	0.084	42.8	40	M
NorthernBobwhite_SimpleDeNovo_contig_104670	gi|224381666|ref|NC_011462.1_TGU1|	70.69	174	28	10	892	1051	17694523	17694359	7e-07	60.8	1697	M
NorthernBobwhite_SimpleDeNovo_contig_10478	gi|224381666|ref|NC_011462.1_TGU1|	68.84	783	178	20	411	1154	101580224	101580979	2e-73	282	74	M
NorthernBobwhite_SimpleDeNovo_contig_104864	gi|224381666|ref|NC_011462.1_TGU1|	85.37	41	6	0	89	129	1595433	1595393	0.001	48.2	502	M
NorthernBobwhite_SimpleDeNovo_contig_10491	gi|224381666|ref|NC_011462.1_TGU1|	81.43	280	45	2	1246	1525	35306683	35306411	5e-69	268	99	M
NorthernBobwhite_SimpleDeNovo_contig_104939	gi|224381666|ref|NC_011462.1_TGU1|	77.91	1933	360	30	1495	3403	90894262	90892373	0	1487	4694	M
NorthernBobwhite_SimpleDeNovo_contig_104978	gi|224381666|ref|NC_011462.1_TGU1|	68.22	214	48	4	1129	1329	49907797	49908003	2e-12	80.6	37	M
NorthernBobwhite_SimpleDeNovo_contig_104998	gi|224381666|ref|NC_011462.1_TGU1|	72.31	697	137	15	1959	2619	39355269	39354593	9e-100	370	82	M
NorthernBobwhite_SimpleDeNovo_contig_105010	gi|224381666|ref|NC_011462.1_TGU1|	75.22	1784	306	37	831	2522	69999020	69997281	0	1180	35	M
NorthernBobwhite_SimpleDeNovo_contig_10505	gi|224381666|ref|NC_011462.1_TGU1|	78.57	266	42	4	1701	1954	9665179	9665441	2e-54	219	236	M
NorthernBobwhite_SimpleDeNovo_contig_105121	gi|224381666|ref|NC_011462.1_TGU1|	73.62	614	118	17	437	1014	42848513	42847908	5e-91	340	141	M
NorthernBobwhite_SimpleDeNovo_contig_105203	gi|224381666|ref|NC_011462.1_TGU1|	69.29	964	243	18	6138	7085	17354251	17353325	2e-99	370	22640	M
NorthernBobwhite_SimpleDeNovo_contig_105206	gi|224381666|ref|NC_011462.1_TGU1|	68.97	2201	505	42	9498	11573	106348235	106350382	0	861	10129	M
NorthernBobwhite_SimpleDeNovo_contig_105224	gi|224381666|ref|NC_011462.1_TGU1|	68.15	314	94	4	253	562	85801944	85802255	3e-20	104	107	M
NorthernBobwhite_SimpleDeNovo_contig_10527	gi|224381666|ref|NC_011462.1_TGU1|	72.92	1274	246	36	1135	2350	57206730	57205498	0	670	300	M
NorthernBobwhite_SimpleDeNovo_contig_100180	gi|224381666|ref|NC_011462.1_TGU1|	72.64	1049	236	23	965	1987	82726040	82725017	5e-151	540	178	M
NorthernBobwhite_SimpleDeNovo_contig_100210	gi|224381666|ref|NC_011462.1_TGU1|	71.28	1605	299	29	1231	2743	109234892	109236426	0	832	7979	M
NorthernBobwhite_SimpleDeNovo_contig_100217	gi|224381666|ref|NC_011462.1_TGU1|	73.85	1308	236	25	1560	2856	113939617	113938405	0	800	419	M
NorthernBobwhite_SimpleDeNovo_contig_100388	gi|224381666|ref|NC_011462.1_TGU1|	67.88	1700	359	56	135	1761	67960304	67958719	5e-145	520	92	M
NorthernBobwhite_SimpleDeNovo_contig_100454	gi|224381666|ref|NC_011462.1_TGU1|	68.57	509	114	13	1272	1757	112104148	112103663	2e-42	179	3432	M
NorthernBobwhite_SimpleDeNovo_contig_100468	gi|224381666|ref|NC_011462.1_TGU1|	72.87	3174	602	73	88	3126	95570366	95573415	0	1746	110	M
NorthernBobwhite_SimpleDeNovo_contig_100492	gi|224381666|ref|NC_011462.1_TGU1|	71.46	529	121	9	1883	2395	54997374	54996860	9e-67	260	10687	M
NorthernBobwhite_SimpleDeNovo_contig_100553	gi|224381666|ref|NC_011462.1_TGU1|	71.43	336	72	10	2019	2340	1150765	1151090	5e-33	150	1301	M
NorthernBobwhite_SimpleDeNovo_contig_100601	gi|224381666|ref|NC_011462.1_TGU1|	71.17	111	22	2	125	235	43605463	43605563	2e-06	57.2	233	M
NorthernBobwhite_SimpleDeNovo_contig_100647	gi|224381666|ref|NC_011462.1_TGU1|	83.87	62	10	0	178	239	25781112	25781173	1e-09	68	1759	M
NorthernBobwhite_SimpleDeNovo_contig_100752	gi|224381666|ref|NC_011462.1_TGU1|	65.17	1183	291	37	1421	2542	101919415	101918293	3e-54	219	164	M
NorthernBobwhite_SimpleDeNovo_contig_100801	gi|224381666|ref|NC_011462.1_TGU1|	66.39	1696	417	44	623	2227	27346306	27344673	4e-117	428	5758	M
NorthernBobwhite_SimpleDeNovo_contig_100974	gi|224381666|ref|NC_011462.1_TGU1|	68.64	523	126	13	79	592	114646203	114645710	2e-42	179	94	M
NorthernBobwhite_SimpleDeNovo_contig_101018	gi|224381666|ref|NC_011462.1_TGU1|	68.5	273	70	8	2633	2899	49950659	49950921	2e-13	84.2	1102	M
NorthernBobwhite_SimpleDeNovo_contig_101123	gi|224381666|ref|NC_011462.1_TGU1|	64.24	2486	595	68	1373	3703	5208303	5210649	1e-118	434	125	M
NorthernBobwhite_SimpleDeNovo_contig_101132	gi|224381666|ref|NC_011462.1_TGU1|	76.92	3774	681	62	334	4023	95207239	95210906	0	2771	133	M
NorthernBobwhite_SimpleDeNovo_contig_101259	gi|224381666|ref|NC_011462.1_TGU1|	71.6	729	139	16	818	1505	113307653	113308354	7e-100	370	5772	M
NorthernBobwhite_SimpleDeNovo_contig_101295	gi|224381666|ref|NC_011462.1_TGU1|	90.38	52	3	1	1	52	5162685	5162636	4e-09	69.8	55	M
NorthernBobwhite_SimpleDeNovo_contig_101338	gi|224381666|ref|NC_011462.1_TGU1|	72.73	627	114	17	1	583	115019611	115020224	3e-89	334	45	M
NorthernBobwhite_SimpleDeNovo_contig_101644	gi|224381666|ref|NC_011462.1_TGU1|	71.67	1292	277	26	1193	2452	62423786	62425020	0	643	30090	M
NorthernBobwhite_SimpleDeNovo_contig_10168	gi|224381666|ref|NC_011462.1_TGU1|	75.37	1985	339	38	130	2012	47249049	47247113	0	1339	3811	M
NorthernBobwhite_SimpleDeNovo_contig_10177	gi|224381666|ref|NC_011462.1_TGU1|	76.77	198	39	5	1199	1394	70213125	70213317	1e-28	134	4653	M
NorthernBobwhite_SimpleDeNovo_contig_102273	gi|224381666|ref|NC_011462.1_TGU1|	67.39	1009	218	28	652	1605	86709708	86708756	8e-82	311	10722	M
NorthernBobwhite_SimpleDeNovo_contig_10237	gi|224381666|ref|NC_011462.1_TGU1|	70.62	2934	575	75	8052	10878	115820935	115818182	0	1326	13546	M
NorthernBobwhite_SimpleDeNovo_contig_102393	gi|224381666|ref|NC_011462.1_TGU1|	69.69	1112	229	29	1	1054	53861405	53862466	1e-124	453	360	M
NorthernBobwhite_SimpleDeNovo_contig_102481	gi|224381666|ref|NC_011462.1_TGU1|	75.95	1476	287	30	1909	3361	29010148	29011578	0	987	9291	M
NorthernBobwhite_SimpleDeNovo_contig_102485	gi|224381666|ref|NC_011462.1_TGU1|	79.22	895	164	11	3	881	10884096	10884984	0	746	6544	M
NorthernBobwhite_SimpleDeNovo_contig_102590	gi|224381666|ref|NC_011462.1_TGU1|	76.55	2665	501	43	58	2662	60184631	60187231	0	1907	6444	M
NorthernBobwhite_SimpleDeNovo_contig_102591	gi|224381666|ref|NC_011462.1_TGU1|	64.53	1356	303	46	247	1523	101018468	101017212	3e-57	230	15154	M
NorthernBobwhite_SimpleDeNovo_contig_102834	gi|224381666|ref|NC_011462.1_TGU1|	67.89	1420	337	44	1	1331	92082071	92083460	4e-113	414	57	M
NorthernBobwhite_SimpleDeNovo_contig_102894	gi|224381666|ref|NC_011462.1_TGU1|	73.84	1013	207	17	842	1806	49200752	49199750	4e-171	609	28767	M
NorthernBobwhite_SimpleDeNovo_contig_102956	gi|224381666|ref|NC_011462.1_TGU1|	70.19	1097	262	20	1	1072	105746185	105747241	3e-131	473	143	M
NorthernBobwhite_SimpleDeNovo_contig_102968	gi|224381666|ref|NC_011462.1_TGU1|	68.57	1661	412	39	97	1693	21807343	21808957	2e-158	565	2744	M
NorthernBobwhite_SimpleDeNovo_contig_103198	gi|224381666|ref|NC_011462.1_TGU1|	67.71	2629	572	77	553	2971	93005341	93002780	0	816	9412	M
NorthernBobwhite_SimpleDeNovo_contig_103233	gi|224381666|ref|NC_011462.1_TGU1|	68.8	971	216	30	1260	2179	76101561	76102495	2e-87	329	5799	M
NorthernBobwhite_SimpleDeNovo_contig_103376	gi|224381666|ref|NC_011462.1_TGU1|	69.37	852	195	20	1235	2077	44954768	44953974	6e-87	329	14338	M
NorthernBobwhite_SimpleDeNovo_contig_103385	gi|224381666|ref|NC_011462.1_TGU1|	74.3	969	208	14	2110	3066	40788222	40787283	1e-168	600	9949	M
NorthernBobwhite_SimpleDeNovo_contig_103474	gi|224381666|ref|NC_011462.1_TGU1|	70.95	1353	299	33	2037	3337	80283774	80285084	3e-170	605	6854	M
NorthernBobwhite_SimpleDeNovo_contig_103567	gi|224381666|ref|NC_011462.1_TGU1|	76.71	919	180	14	3486	4379	106756428	106757337	0	661	12113	M
NorthernBobwhite_SimpleDeNovo_contig_103568	gi|224381666|ref|NC_011462.1_TGU1|	82.08	385	66	2	546	927	50605422	50605038	2e-102	378	64	M
NorthernBobwhite_SimpleDeNovo_contig_103729	gi|224381666|ref|NC_011462.1_TGU1|	77.04	1089	211	13	2481	3549	11672004	11673073	0	814	7622	M
NorthernBobwhite_SimpleDeNovo_contig_10377	gi|224381666|ref|NC_011462.1_TGU1|	70.32	2062	432	44	8011	9969	16810822	16808838	0	924	6116	M
NorthernBobwhite_SimpleDeNovo_contig_103821	gi|224381666|ref|NC_011462.1_TGU1|	75.55	364	67	8	334	680	79937078	79937436	3e-60	239	6576	M
NorthernBobwhite_SimpleDeNovo_contig_10386	gi|224381666|ref|NC_011462.1_TGU1|	67.49	2276	512	59	186	2328	12945860	12948040	0	708	6768	M
NorthernBobwhite_SimpleDeNovo_contig_103958	gi|224381666|ref|NC_011462.1_TGU1|	71.3	345	90	6	95	432	12347133	12347475	2e-36	158	10079	M
NorthernBobwhite_SimpleDeNovo_contig_104182	gi|224381666|ref|NC_011462.1_TGU1|	67.81	1404	327	32	2476	3797	116500089	116498729	3e-127	462	13762	M
NorthernBobwhite_SimpleDeNovo_contig_104243	gi|224381666|ref|NC_011462.1_TGU1|	74.68	1742	350	26	4035	5756	34438421	34440091	0	1119	12036	M
NorthernBobwhite_SimpleDeNovo_contig_104391	gi|224381666|ref|NC_011462.1_TGU1|	76.23	408	77	4	1950	2356	1163708	1164096	4e-78	298	180	M
NorthernBobwhite_SimpleDeNovo_contig_104406	gi|224381666|ref|NC_011462.1_TGU1|	72.26	429	80	11	143	566	27455706	27455312	8e-56	223	269	M
NorthernBobwhite_SimpleDeNovo_contig_104450	gi|224381666|ref|NC_011462.1_TGU1|	84.72	1518	159	23	1222	2681	71115184	71116686	0	1654	121	M
NorthernBobwhite_SimpleDeNovo_contig_104676	gi|224381666|ref|NC_011462.1_TGU1|	65.67	2432	571	74	3115	5418	81329394	81327099	3e-146	526	1787	M
NorthernBobwhite_SimpleDeNovo_contig_104724	gi|224381666|ref|NC_011462.1_TGU1|	70.45	528	132	10	1494	2012	51418436	51418948	3e-56	226	4993	M
NorthernBobwhite_SimpleDeNovo_contig_104725	gi|224381666|ref|NC_011462.1_TGU1|	80.2	404	70	4	2985	3386	97745265	97745660	2e-96	360	3466	M
NorthernBobwhite_SimpleDeNovo_contig_104768	gi|224381666|ref|NC_011462.1_TGU1|	87.5	48	5	1	1478	1524	83397323	83397276	1e-05	57.2	754	M
NorthernBobwhite_SimpleDeNovo_contig_104846	gi|224381666|ref|NC_011462.1_TGU1|	71.33	1751	305	49	10	1641	38755179	38756851	0	852	73	M
NorthernBobwhite_SimpleDeNovo_contig_104861	gi|224381666|ref|NC_011462.1_TGU1|	68.13	342	88	8	460	788	22585867	22586200	5e-21	109	467	M
NorthernBobwhite_SimpleDeNovo_contig_104958	gi|224381666|ref|NC_011462.1_TGU1|	67.12	2667	553	76	2909	5336	62754284	62751703	0	805	692	M
NorthernBobwhite_SimpleDeNovo_contig_104977	gi|224381666|ref|NC_011462.1_TGU1|	72.3	1592	310	26	1496	3004	50320585	50319042	0	884	8865	M
NorthernBobwhite_SimpleDeNovo_contig_104984	gi|224381666|ref|NC_011462.1_TGU1|	74.22	931	167	22	1790	2702	117485818	117486693	6e-158	563	112	M
NorthernBobwhite_SimpleDeNovo_contig_104997	gi|224381666|ref|NC_011462.1_TGU1|	69.74	2664	581	63	2719	5250	92157877	92155307	0	1090	633	M
NorthernBobwhite_SimpleDeNovo_contig_105078	gi|224381666|ref|NC_011462.1_TGU1|	64.96	2680	639	81	1186	3778	111213826	111211360	2e-140	506	2669	M
NorthernBobwhite_SimpleDeNovo_contig_105239	gi|224381666|ref|NC_011462.1_TGU1|	73.66	429	73	11	1167	1588	71294102	71293707	8e-64	251	4239	M
NorthernBobwhite_SimpleDeNovo_contig_105465	gi|224381666|ref|NC_011462.1_TGU1|	78.23	441	83	7	2	434	74972683	74973118	1e-92	343	54	M
NorthernBobwhite_SimpleDeNovo_contig_105481	gi|224381666|ref|NC_011462.1_TGU1|	75.37	1567	291	30	109	1611	114046571	114048106	0	1036	624	M
NorthernBobwhite_SimpleDeNovo_contig_105585	gi|224381666|ref|NC_011462.1_TGU1|	70.94	726	169	14	712	1422	63776366	63777064	3e-88	333	10260	M
NorthernBobwhite_SimpleDeNovo_contig_105596	gi|224381666|ref|NC_011462.1_TGU1|	69.11	790	170	22	67	805	56904813	56905579	8e-77	293	62	M
NorthernBobwhite_SimpleDeNovo_contig_105634	gi|224381666|ref|NC_011462.1_TGU1|	73.04	675	122	18	19	655	84423708	84423056	8e-100	370	3669	M
NorthernBobwhite_SimpleDeNovo_contig_105669	gi|224381666|ref|NC_011462.1_TGU1|	68.98	1612	335	38	792	2346	110954263	110952760	5e-178	630	7547	M
NorthernBobwhite_SimpleDeNovo_contig_10572	gi|224381666|ref|NC_011462.1_TGU1|	79.68	689	101	9	11	662	18368792	18369478	9e-171	607	173	M
NorthernBobwhite_SimpleDeNovo_contig_105732	gi|224381666|ref|NC_011462.1_TGU1|	80.16	257	43	3	1478	1734	66809090	66809338	4e-57	228	5725	M
NorthernBobwhite_SimpleDeNovo_contig_100011	gi|224381666|ref|NC_011462.1_TGU1|	74.75	598	112	13	31	594	79000271	79000863	1e-101	374	39	M
NorthernBobwhite_SimpleDeNovo_contig_10015	gi|224381666|ref|NC_011462.1_TGU1|	65.42	4667	1077	134	14862	19221	18633015	18637451	0	1020	2203	M
NorthernBobwhite_SimpleDeNovo_contig_100156	gi|224381666|ref|NC_011462.1_TGU1|	69.54	857	194	19	1143	1987	48689501	48690302	9e-92	343	67	M
NorthernBobwhite_SimpleDeNovo_contig_100192	gi|224381666|ref|NC_011462.1_TGU1|	73.75	899	189	16	567	1438	96459229	96460107	2e-147	527	44	M
NorthernBobwhite_SimpleDeNovo_contig_100203	gi|224381666|ref|NC_011462.1_TGU1|	69.79	1483	320	52	1693	3108	43107616	43106195	1e-149	536	10270	M
NorthernBobwhite_SimpleDeNovo_contig_100327	gi|224381666|ref|NC_011462.1_TGU1|	78.19	2755	452	44	3827	6485	40183294	40180593	0	2195	127	M
NorthernBobwhite_SimpleDeNovo_contig_100355	gi|224381666|ref|NC_011462.1_TGU1|	71.24	772	208	8	1	765	46742805	46743569	2e-99	369	8348	M
NorthernBobwhite_SimpleDeNovo_contig_100396	gi|224381666|ref|NC_011462.1_TGU1|	78.69	61	12	1	656	716	98875044	98875103	0.01	48.2	99	M
NorthernBobwhite_SimpleDeNovo_contig_100430	gi|224381666|ref|NC_011462.1_TGU1|	70.7	669	134	13	533	1167	37960866	37960226	7e-85	320	6697	M
NorthernBobwhite_SimpleDeNovo_contig_100557	gi|224381666|ref|NC_011462.1_TGU1|	74.13	1848	396	34	321	2152	30523316	30525097	0	1099	19838	M
NorthernBobwhite_SimpleDeNovo_contig_100586	gi|224381666|ref|NC_011462.1_TGU1|	68.28	1094	230	32	1359	2357	57157047	57155976	1e-99	370	20905	M
NorthernBobwhite_SimpleDeNovo_contig_100646	gi|224381666|ref|NC_011462.1_TGU1|	83.1	71	11	1	287	356	109298188	109298118	2e-10	71.6	76	M
NorthernBobwhite_SimpleDeNovo_contig_100725	gi|224381666|ref|NC_011462.1_TGU1|	79.89	875	109	22	2060	2899	114241250	114242092	0	746	586	M
NorthernBobwhite_SimpleDeNovo_contig_1009	gi|224381666|ref|NC_011462.1_TGU1|	72.25	4436	913	91	2451	6729	29646598	29642324	0	2327	17530	M
NorthernBobwhite_SimpleDeNovo_contig_101063	gi|224381666|ref|NC_011462.1_TGU1|	67.14	2191	477	61	114	2180	26615398	26617469	0	650	172	M
NorthernBobwhite_SimpleDeNovo_contig_101134	gi|224381666|ref|NC_011462.1_TGU1|	73.41	899	173	17	3076	3943	28029907	28030770	7e-147	527	1070	M
NorthernBobwhite_SimpleDeNovo_contig_10117	gi|224381666|ref|NC_011462.1_TGU1|	69.97	1815	377	46	13372	15102	101754126	101755856	0	760	9948	M
NorthernBobwhite_SimpleDeNovo_contig_101176	gi|224381666|ref|NC_011462.1_TGU1|	78.57	70	15	0	1006	1075	85506049	85505980	2e-06	59	1075	M
NorthernBobwhite_SimpleDeNovo_contig_101238	gi|224381666|ref|NC_011462.1_TGU1|	71.94	841	180	19	55	862	108804526	108805343	4e-114	417	2622	M
NorthernBobwhite_SimpleDeNovo_contig_101337	gi|224381666|ref|NC_011462.1_TGU1|	72.21	421	98	10	2833	3242	115017433	115017021	8e-50	205	786	M
NorthernBobwhite_SimpleDeNovo_contig_101426	gi|224381666|ref|NC_011462.1_TGU1|	75.92	760	131	13	30	768	92836498	92835770	8e-150	535	1033	M
NorthernBobwhite_SimpleDeNovo_contig_10148	gi|224381666|ref|NC_011462.1_TGU1|	72.41	87	24	0	2365	2451	95532119	95532033	0.006	50	63	M
NorthernBobwhite_SimpleDeNovo_contig_101557	gi|224381666|ref|NC_011462.1_TGU1|	68.1	1586	397	28	3861	5421	53302550	53301049	1e-153	551	180	M
NorthernBobwhite_SimpleDeNovo_contig_101765	gi|224381666|ref|NC_011462.1_TGU1|	89.66	29	3	0	39	67	95927731	95927703	1.6	39.2	12	M
NorthernBobwhite_SimpleDeNovo_contig_101911	gi|224381666|ref|NC_011462.1_TGU1|	70.16	124	33	1	144	263	77909616	77909739	2e-06	57.2	67	M
NorthernBobwhite_SimpleDeNovo_contig_10192	gi|224381666|ref|NC_011462.1_TGU1|	82.14	571	89	6	3562	4126	91578497	91577934	5e-155	554	183	M
NorthernBobwhite_SimpleDeNovo_contig_102014	gi|224381666|ref|NC_011462.1_TGU1|	75.21	484	91	6	134	610	94149273	94148812	4e-88	331	42	M
NorthernBobwhite_SimpleDeNovo_contig_102059	gi|224381666|ref|NC_011462.1_TGU1|	71.88	224	54	6	655	871	57292099	57292320	2e-19	102	55	M
NorthernBobwhite_SimpleDeNovo_contig_102072	gi|224381666|ref|NC_011462.1_TGU1|	70.83	96	28	0	124	219	85689318	85689413	0.001	48.2	110	M
NorthernBobwhite_SimpleDeNovo_contig_102120	gi|224381666|ref|NC_011462.1_TGU1|	72.2	518	106	11	5716	6217	68385828	68385333	4e-69	269	8869	M
NorthernBobwhite_SimpleDeNovo_contig_102184	gi|224381666|ref|NC_011462.1_TGU1|	68.28	3805	874	93	1179	4782	115431578	115435250	0	1301	98	M
NorthernBobwhite_SimpleDeNovo_contig_102221	gi|224381666|ref|NC_011462.1_TGU1|	70.05	3469	735	84	722	3974	86605538	86608918	0	1467	26304	M
NorthernBobwhite_SimpleDeNovo_contig_102249	gi|224381666|ref|NC_011462.1_TGU1|	71.1	1322	284	33	151	1400	18405160	18406455	1e-169	601	117	M
NorthernBobwhite_SimpleDeNovo_contig_102376	gi|224381666|ref|NC_011462.1_TGU1|	74.73	1290	219	31	4	1236	57361134	57359895	0	814	61	M
NorthernBobwhite_SimpleDeNovo_contig_102422	gi|224381666|ref|NC_011462.1_TGU1|	76.08	510	83	7	415	903	20208311	20207820	2e-101	374	20565	M
NorthernBobwhite_SimpleDeNovo_contig_102455	gi|224381666|ref|NC_011462.1_TGU1|	77.91	1118	204	11	4027	5132	69820459	69819373	0	892	603	M
NorthernBobwhite_SimpleDeNovo_contig_102544	gi|224381666|ref|NC_011462.1_TGU1|	76.47	85	11	5	1253	1337	101001823	101001748	0.003	50	122	M
NorthernBobwhite_SimpleDeNovo_contig_102725	gi|224381666|ref|NC_011462.1_TGU1|	79.11	723	97	14	559	1234	15652243	15651528	7e-172	609	61	M
NorthernBobwhite_SimpleDeNovo_contig_102737	gi|224381666|ref|NC_011462.1_TGU1|	72.84	729	131	20	6625	7307	5519425	5518718	6e-106	392	2935	M
NorthernBobwhite_SimpleDeNovo_contig_102829	gi|224381666|ref|NC_011462.1_TGU1|	67.67	4605	1132	107	4717	9104	23570455	23565991	0	1431	13915	M
NorthernBobwhite_SimpleDeNovo_contig_102863	gi|224381666|ref|NC_011462.1_TGU1|	87.36	736	59	14	471	1185	98869945	98869223	0	875	794	M
NorthernBobwhite_SimpleDeNovo_contig_102950	gi|224381666|ref|NC_011462.1_TGU1|	73.12	1142	210	25	2582	3671	2506646	2507742	0	650	2042	M
NorthernBobwhite_SimpleDeNovo_contig_103073	gi|224381666|ref|NC_011462.1_TGU1|	77.05	414	76	10	196	596	30302856	30303263	1e-76	291	1287	M
NorthernBobwhite_SimpleDeNovo_contig_103075	gi|224381666|ref|NC_011462.1_TGU1|	68	828	216	23	20	824	45612442	45611641	1e-60	239	15864	M
NorthernBobwhite_SimpleDeNovo_contig_103207	gi|224381666|ref|NC_011462.1_TGU1|	69.38	516	126	7	13	498	28360270	28360783	3e-53	215	1323	M
NorthernBobwhite_SimpleDeNovo_contig_103283	gi|224381666|ref|NC_011462.1_TGU1|	71.89	217	50	4	922	1128	18198127	18197912	1e-21	109	800	M
NorthernBobwhite_SimpleDeNovo_contig_103295	gi|224381666|ref|NC_011462.1_TGU1|	71.71	1976	432	44	1113	3025	98640862	98638951	0	960	14543	M
NorthernBobwhite_SimpleDeNovo_contig_103693	gi|224381666|ref|NC_011462.1_TGU1|	68.91	3657	818	76	4623	8085	40677971	40674440	0	1415	821	M
NorthernBobwhite_SimpleDeNovo_contig_103866	gi|224381666|ref|NC_011462.1_TGU1|	67.4	3052	660	69	8130	10948	40738620	40741569	0	1009	15493	M
NorthernBobwhite_SimpleDeNovo_contig_103999	gi|224381666|ref|NC_011462.1_TGU1|	67.72	285	43	7	234	515	82258728	82258966	2e-22	113	4808	M
NorthernBobwhite_SimpleDeNovo_contig_104028	gi|224381666|ref|NC_011462.1_TGU1|	73.64	497	93	12	4566	5039	50642730	50643211	5e-74	286	6846	M
NorthernBobwhite_SimpleDeNovo_contig_10409	gi|224381666|ref|NC_011462.1_TGU1|	68.23	683	158	20	2380	3032	100499285	100499938	1e-53	217	1397	M
NorthernBobwhite_SimpleDeNovo_contig_104240	gi|224381666|ref|NC_011462.1_TGU1|	71.48	1206	235	39	1743	2902	63068898	63067756	7e-153	547	175	M
NorthernBobwhite_SimpleDeNovo_contig_104272	gi|224381666|ref|NC_011462.1_TGU1|	82.4	341	55	2	2262	2599	57328756	57329094	2e-90	340	10093	M
NorthernBobwhite_SimpleDeNovo_contig_104310	gi|224381666|ref|NC_011462.1_TGU1|	72.12	2080	448	35	13003	14983	35085702	35087748	0	1097	3387	M
NorthernBobwhite_SimpleDeNovo_contig_104352	gi|224381666|ref|NC_011462.1_TGU1|	70.99	1327	278	29	1088	2357	2316782	2318058	8e-176	623	124	M
NorthernBobwhite_SimpleDeNovo_contig_104407	gi|224381666|ref|NC_011462.1_TGU1|	69.04	1796	440	40	3178	4920	80129383	80127651	0	657	145	M
NorthernBobwhite_SimpleDeNovo_contig_104652	gi|224381666|ref|NC_011462.1_TGU1|	67.59	2567	584	59	5675	8145	2466330	2463916	0	836	14424	M
NorthernBobwhite_SimpleDeNovo_contig_104695	gi|224381666|ref|NC_011462.1_TGU1|	69.57	2941	613	72	22	2808	81622200	81625012	0	1198	4045	M
NorthernBobwhite_SimpleDeNovo_contig_104868	gi|224381666|ref|NC_011462.1_TGU1|	72.46	403	89	5	1	399	43064941	43065325	3e-56	224	12609	M
NorthernBobwhite_SimpleDeNovo_contig_10487	gi|224381666|ref|NC_011462.1_TGU1|	69.34	1631	391	29	1776	3342	57552671	57551086	0	655	80	M
NorthernBobwhite_SimpleDeNovo_contig_1049	gi|224381666|ref|NC_011462.1_TGU1|	82.14	84	11	2	5562	5642	17640638	17640556	2e-11	78.8	318	M
NorthernBobwhite_SimpleDeNovo_contig_104942	gi|224381666|ref|NC_011462.1_TGU1|	71.76	386	85	12	163	530	60940629	60940250	7e-41	172	38	M
NorthernBobwhite_SimpleDeNovo_contig_104972	gi|224381666|ref|NC_011462.1_TGU1|	75.05	1892	356	40	3563	5381	67731674	67733522	0	1209	77	M
NorthernBobwhite_SimpleDeNovo_contig_105	gi|224381666|ref|NC_011462.1_TGU1|	66.15	1796	396	59	1	1689	35150716	35152406	2e-115	423	491	M
NorthernBobwhite_SimpleDeNovo_contig_105001	gi|224381666|ref|NC_011462.1_TGU1|	74.34	226	40	6	3629	3842	83251497	83251716	4e-29	136	83	M
NorthernBobwhite_SimpleDeNovo_contig_105200	gi|224381666|ref|NC_011462.1_TGU1|	82.17	617	110	0	6502	7118	96269384	96270000	8e-174	618	3937	M
NorthernBobwhite_SimpleDeNovo_contig_10537	gi|224381666|ref|NC_011462.1_TGU1|	76.25	3612	599	59	8735	12236	67754532	67757994	0	2614	17591	M
NorthernBobwhite_SimpleDeNovo_contig_105503	gi|224381666|ref|NC_011462.1_TGU1|	82.48	7785	949	115	4702	12251	36324267	36331871	0	7746	4837	M
NorthernBobwhite_SimpleDeNovo_contig_105512	gi|224381666|ref|NC_011462.1_TGU1|	79.45	793	141	12	1	783	117346523	117345743	0	661	96	M
NorthernBobwhite_SimpleDeNovo_contig_105523	gi|224381666|ref|NC_011462.1_TGU1|	70.56	1172	269	25	2451	3560	111333943	111332786	7e-143	515	7510	M
NorthernBobwhite_SimpleDeNovo_contig_10554	gi|224381666|ref|NC_011462.1_TGU1|	72.77	683	116	18	352	974	88126481	88125809	6e-102	376	184	M
NorthernBobwhite_SimpleDeNovo_contig_105540	gi|224381666|ref|NC_011462.1_TGU1|	73.33	285	62	4	7	290	32259080	32259351	3e-39	167	69	M
NorthernBobwhite_SimpleDeNovo_contig_105552	gi|224381666|ref|NC_011462.1_TGU1|	79.23	7539	1109	135	1	7334	104155197	104147911	0	6340	3085	M
NorthernBobwhite_SimpleDeNovo_contig_105561	gi|224381666|ref|NC_011462.1_TGU1|	67.42	1151	240	34	2331	3385	91931584	91932695	1e-94	354	23310	M
NorthernBobwhite_SimpleDeNovo_contig_105606	gi|224381666|ref|NC_011462.1_TGU1|	66.97	1420	336	39	1	1340	81754138	81752772	1e-105	390	13567	M
NorthernBobwhite_SimpleDeNovo_contig_105642	gi|224381666|ref|NC_011462.1_TGU1|	69.35	1005	216	27	7003	7949	52902854	52901884	1e-103	385	19424	M
NorthernBobwhite_SimpleDeNovo_contig_100068	gi|224381666|ref|NC_011462.1_TGU1|	65.48	3844	857	110	517	4163	29715524	29719094	0	877	3093	M
NorthernBobwhite_SimpleDeNovo_contig_100085	gi|224381666|ref|NC_011462.1_TGU1|	79.99	2094	319	25	261	2341	58619977	58617971	0	1865	27492	M
NorthernBobwhite_SimpleDeNovo_contig_10009	gi|224381666|ref|NC_011462.1_TGU1|	72.54	448	102	7	3165	3604	75473743	75473309	1e-60	241	539	M
NorthernBobwhite_SimpleDeNovo_contig_100093	gi|224381666|ref|NC_011462.1_TGU1|	66.92	1173	226	37	18	1072	40007585	40006457	2e-92	345	88	M
NorthernBobwhite_SimpleDeNovo_contig_100179	gi|224381666|ref|NC_011462.1_TGU1|	73.28	393	81	11	826	1213	39250280	39250653	5e-51	208	10722	M
NorthernBobwhite_SimpleDeNovo_contig_100216	gi|224381666|ref|NC_011462.1_TGU1|	69.69	716	138	13	887	1543	113942457	113943152	2e-86	325	58	M
NorthernBobwhite_SimpleDeNovo_contig_100232	gi|224381666|ref|NC_011462.1_TGU1|	75.13	193	42	4	12	201	38473746	38473557	3e-25	120	190	M
NorthernBobwhite_SimpleDeNovo_contig_100260	gi|224381666|ref|NC_011462.1_TGU1|	69.1	1259	292	41	4367	5568	96315873	96314655	3e-114	419	11782	M
NorthernBobwhite_SimpleDeNovo_contig_100385	gi|224381666|ref|NC_011462.1_TGU1|	80.13	785	123	11	5707	6482	104509446	104510206	0	693	119	M
NorthernBobwhite_SimpleDeNovo_contig_100496	gi|224381666|ref|NC_011462.1_TGU1|	93.1	29	2	0	741	769	65777505	65777533	0.082	44.6	30	M
NorthernBobwhite_SimpleDeNovo_contig_100520	gi|224381666|ref|NC_011462.1_TGU1|	74.01	731	156	12	90	793	93550213	93550936	1e-120	439	56	M
NorthernBobwhite_SimpleDeNovo_contig_100555	gi|224381666|ref|NC_011462.1_TGU1|	81.63	49	7	1	1191	1239	57568995	57568949	0.025	46.4	55	M
NorthernBobwhite_SimpleDeNovo_contig_100719	gi|224381666|ref|NC_011462.1_TGU1|	72.55	1439	320	23	1184	2578	36617694	36619101	0	778	29010	M
NorthernBobwhite_SimpleDeNovo_contig_100833	gi|224381666|ref|NC_011462.1_TGU1|	67.34	2737	630	73	1229	3815	32686019	32683397	0	814	353	M
NorthernBobwhite_SimpleDeNovo_contig_100949	gi|224381666|ref|NC_011462.1_TGU1|	78.54	233	37	2	247	479	7048409	7048628	3e-48	197	123	M
NorthernBobwhite_SimpleDeNovo_contig_100989	gi|224381666|ref|NC_011462.1_TGU1|	75.5	898	179	16	1469	2341	6090036	6090917	2e-166	592	105	M
NorthernBobwhite_SimpleDeNovo_contig_101007	gi|224381666|ref|NC_011462.1_TGU1|	72.33	459	111	9	561	1016	46276021	46276466	1e-57	230	5932	M
NorthernBobwhite_SimpleDeNovo_contig_101021	gi|224381666|ref|NC_011462.1_TGU1|	66.79	274	77	6	634	904	14640855	14640593	1e-09	69.8	75	M
NorthernBobwhite_SimpleDeNovo_contig_101177	gi|224381666|ref|NC_011462.1_TGU1|	68.1	837	216	16	1179	1994	75040444	75039638	3e-72	280	4491	M
NorthernBobwhite_SimpleDeNovo_contig_101210	gi|224381666|ref|NC_011462.1_TGU1|	68.6	293	56	14	503	782	21837087	21837356	4e-14	84.2	65	M
NorthernBobwhite_SimpleDeNovo_contig_101272	gi|224381666|ref|NC_011462.1_TGU1|	65.72	1686	403	50	1957	3532	33730058	33731678	1e-98	367	2576	M
NorthernBobwhite_SimpleDeNovo_contig_101342	gi|224381666|ref|NC_011462.1_TGU1|	71.6	979	206	24	86	1020	95824552	95825502	2e-129	470	6912	M
NorthernBobwhite_SimpleDeNovo_contig_101391	gi|224381666|ref|NC_011462.1_TGU1|	76.08	761	138	9	2315	3070	98242006	98241285	9e-154	551	26947	M
NorthernBobwhite_SimpleDeNovo_contig_101414	gi|224381666|ref|NC_011462.1_TGU1|	69.31	1199	256	24	1505	2629	102203054	102204214	1e-137	497	66	M
NorthernBobwhite_SimpleDeNovo_contig_101547	gi|224381666|ref|NC_011462.1_TGU1|	75.27	651	116	15	2211	2834	39071999	39072631	7e-115	421	192	M
NorthernBobwhite_SimpleDeNovo_contig_101621	gi|224381666|ref|NC_011462.1_TGU1|	67.53	1155	270	35	3202	4290	64662277	64661162	4e-87	329	1844	M
NorthernBobwhite_SimpleDeNovo_contig_101626	gi|224381666|ref|NC_011462.1_TGU1|	68.77	1188	285	35	54	1193	101802372	101801223	4e-106	390	61	M
NorthernBobwhite_SimpleDeNovo_contig_101729	gi|224381666|ref|NC_011462.1_TGU1|	75.58	909	178	23	86	976	93399938	93400820	2e-161	574	7564	M
NorthernBobwhite_SimpleDeNovo_contig_101816	gi|224381666|ref|NC_011462.1_TGU1|	67.08	2898	699	82	4516	7312	17790646	17787903	0	785	2621	M
NorthernBobwhite_SimpleDeNovo_contig_101845	gi|224381666|ref|NC_011462.1_TGU1|	78.07	1172	213	17	257	1408	35741834	35740687	0	919	7915	M
NorthernBobwhite_SimpleDeNovo_contig_101869	gi|224381666|ref|NC_011462.1_TGU1|	73.84	279	69	4	145	422	32454915	32455190	4e-37	159	13436	M
NorthernBobwhite_SimpleDeNovo_contig_101905	gi|224381666|ref|NC_011462.1_TGU1|	74.39	164	36	3	1	163	52191472	52191630	7e-19	98.7	54	M
NorthernBobwhite_SimpleDeNovo_contig_101914	gi|224381666|ref|NC_011462.1_TGU1|	72.89	1859	351	39	696	2495	85835054	85833290	0	1043	217	M
NorthernBobwhite_SimpleDeNovo_contig_102066	gi|224381666|ref|NC_011462.1_TGU1|	79.53	596	87	9	2679	3253	42180968	42181549	9e-144	517	6078	M
NorthernBobwhite_SimpleDeNovo_contig_102071	gi|224381666|ref|NC_011462.1_TGU1|	77.68	1586	288	24	3819	5353	85695250	85693680	0	1216	7851	M
NorthernBobwhite_SimpleDeNovo_contig_102237	gi|224381666|ref|NC_011462.1_TGU1|	72.74	1126	194	23	1	1038	29985719	29984619	0	645	19654	M
NorthernBobwhite_SimpleDeNovo_contig_102268	gi|224381666|ref|NC_011462.1_TGU1|	66.07	1126	234	34	815	1863	68461877	68460823	2e-75	289	6071	M
NorthernBobwhite_SimpleDeNovo_contig_102406	gi|224381666|ref|NC_011462.1_TGU1|	68.36	177	50	3	30	205	79509992	79509821	8e-07	59	100	M
NorthernBobwhite_SimpleDeNovo_contig_102454	gi|224381666|ref|NC_011462.1_TGU1|	72.8	1956	371	41	12019	13852	91271043	91272959	0	1090	14007	M
NorthernBobwhite_SimpleDeNovo_contig_102514	gi|224381666|ref|NC_011462.1_TGU1|	67.41	948	226	20	707	1606	4458261	4459173	2e-79	302	41	M
NorthernBobwhite_SimpleDeNovo_contig_102524	gi|224381666|ref|NC_011462.1_TGU1|	82.75	632	100	6	844	1471	88333298	88333924	8e-178	630	125	M
NorthernBobwhite_SimpleDeNovo_contig_102542	gi|224381666|ref|NC_011462.1_TGU1|	74.04	836	180	11	1045	1877	61776178	61776979	1e-142	513	21225	M
NorthernBobwhite_SimpleDeNovo_contig_10261	gi|224381666|ref|NC_011462.1_TGU1|	73.25	243	50	8	5715	5948	98935009	98935245	4e-25	123	4336	M
NorthernBobwhite_SimpleDeNovo_contig_102673	gi|224381666|ref|NC_011462.1_TGU1|	80.91	613	102	3	1678	2281	116642131	116642737	4e-162	578	15220	M
NorthernBobwhite_SimpleDeNovo_contig_102675	gi|224381666|ref|NC_011462.1_TGU1|	82.14	84	10	2	131	209	109802158	109802075	2e-13	80.6	4227	M
NorthernBobwhite_SimpleDeNovo_contig_102694	gi|224381666|ref|NC_011462.1_TGU1|	71.95	435	108	8	429	858	79797535	79797960	2e-52	212	333	M
NorthernBobwhite_SimpleDeNovo_contig_102724	gi|224381666|ref|NC_011462.1_TGU1|	75.72	2883	511	53	2047	4799	107521128	107523951	0	1975	7607	M
NorthernBobwhite_SimpleDeNovo_contig_102988	gi|224381666|ref|NC_011462.1_TGU1|	85.19	54	6	1	229	282	64609620	64609671	1e-06	59	38	M
NorthernBobwhite_SimpleDeNovo_contig_102999	gi|224381666|ref|NC_011462.1_TGU1|	73.16	1967	428	35	55	1974	106261452	106263365	0	1099	336	M
NorthernBobwhite_SimpleDeNovo_contig_103074	gi|224381666|ref|NC_011462.1_TGU1|	76.46	412	82	8	198	598	30302856	30303263	2e-74	284	43	M
NorthernBobwhite_SimpleDeNovo_contig_103087	gi|224381666|ref|NC_011462.1_TGU1|	75.68	477	100	4	3382	3849	18315370	18314901	1e-88	334	28264	M
NorthernBobwhite_SimpleDeNovo_contig_103091	gi|224381666|ref|NC_011462.1_TGU1|	78.87	2011	317	24	221	2190	25150277	25152220	0	1700	74	M
NorthernBobwhite_SimpleDeNovo_contig_103165	gi|224381666|ref|NC_011462.1_TGU1|	82.53	1918	240	32	733	2601	80629695	80627824	0	1891	101	M
NorthernBobwhite_SimpleDeNovo_contig_103170	gi|224381666|ref|NC_011462.1_TGU1|	79.21	356	66	4	1656	2010	110846777	110846429	3e-78	298	146	M
NorthernBobwhite_SimpleDeNovo_contig_103216	gi|224381666|ref|NC_011462.1_TGU1|	70.7	157	37	1	3808	3955	73427853	73428009	2e-12	80.6	202	M
NorthernBobwhite_SimpleDeNovo_contig_103231	gi|224381666|ref|NC_011462.1_TGU1|	66.51	418	116	8	7	401	6871868	6872284	6e-22	109	1114	M
NorthernBobwhite_SimpleDeNovo_contig_103286	gi|224381666|ref|NC_011462.1_TGU1|	71.36	831	183	11	1150	1951	38174902	38175706	7e-117	426	73	M
NorthernBobwhite_SimpleDeNovo_contig_103463	gi|224381666|ref|NC_011462.1_TGU1|	74.3	1424	230	33	1818	3157	33377504	33378875	0	892	2077	M
NorthernBobwhite_SimpleDeNovo_contig_103509	gi|224381666|ref|NC_011462.1_TGU1|	94.29	35	1	1	329	362	17795602	17795568	0.0001	51.8	75	M
NorthernBobwhite_SimpleDeNovo_contig_103681	gi|224381666|ref|NC_011462.1_TGU1|	78.68	197	32	4	503	692	31774751	31774944	2e-36	158	9184	M
NorthernBobwhite_SimpleDeNovo_contig_103691	gi|224381666|ref|NC_011462.1_TGU1|	70.11	1783	374	48	988	2690	91515784	91514081	0	740	4380	M
NorthernBobwhite_SimpleDeNovo_contig_103711	gi|224381666|ref|NC_011462.1_TGU1|	77.28	3248	535	60	8197	11350	104201659	104198521	0	2443	215	M
NorthernBobwhite_SimpleDeNovo_contig_103887	gi|224381666|ref|NC_011462.1_TGU1|	73.39	248	60	5	292	537	41244439	41244196	9e-29	132	6133	M
NorthernBobwhite_SimpleDeNovo_contig_104027	gi|224381666|ref|NC_011462.1_TGU1|	71.79	1092	211	25	723	1750	54801951	54800893	8e-156	556	43	M
NorthernBobwhite_SimpleDeNovo_contig_104045	gi|224381666|ref|NC_011462.1_TGU1|	66.88	314	77	11	419	714	4977711	4978015	7e-11	73.4	66	M
NorthernBobwhite_SimpleDeNovo_contig_104057	gi|224381666|ref|NC_011462.1_TGU1|	69.65	537	119	10	305	826	75521788	75521281	7e-57	228	3487	M
NorthernBobwhite_SimpleDeNovo_contig_104080	gi|224381666|ref|NC_011462.1_TGU1|	72.24	998	227	21	1710	2671	49589992	49589009	2e-139	502	12978	M
NorthernBobwhite_SimpleDeNovo_contig_104106	gi|224381666|ref|NC_011462.1_TGU1|	87.93	290	33	1	3697	3986	10946866	10946579	2e-97	363	4722	M
NorthernBobwhite_SimpleDeNovo_contig_104137	gi|224381666|ref|NC_011462.1_TGU1|	76.94	1279	234	22	412	1680	80924078	80925305	0	933	29244	M
NorthernBobwhite_SimpleDeNovo_contig_104227	gi|224381666|ref|NC_011462.1_TGU1|	73.56	1615	351	31	981	2559	79005164	79003590	0	917	3583	M
NorthernBobwhite_SimpleDeNovo_contig_104306	gi|224381666|ref|NC_011462.1_TGU1|	66.67	840	209	22	2340	3150	69560608	69559811	2e-53	217	21595	M
NorthernBobwhite_SimpleDeNovo_contig_104336	gi|224381666|ref|NC_011462.1_TGU1|	71.02	2419	489	49	263	2573	102590626	102588312	0	1173	24497	M
NorthernBobwhite_SimpleDeNovo_contig_104342	gi|224381666|ref|NC_011462.1_TGU1|	66.14	319	76	7	500	813	5140010	5140301	1e-14	86	39	M
NorthernBobwhite_SimpleDeNovo_contig_104343	gi|224381666|ref|NC_011462.1_TGU1|	67.55	265	68	11	1	254	5140871	5140614	3e-06	57.2	2202	M
NorthernBobwhite_SimpleDeNovo_contig_104360	gi|224381666|ref|NC_011462.1_TGU1|	66.59	428	91	18	2965	3353	109976832	109976418	4e-16	93.3	845	M
NorthernBobwhite_SimpleDeNovo_contig_104377	gi|224381666|ref|NC_011462.1_TGU1|	71.78	567	134	9	1165	1725	72197255	72196709	7e-74	284	3176	M
NorthernBobwhite_SimpleDeNovo_contig_100026	gi|224381666|ref|NC_011462.1_TGU1|	69.16	561	127	18	63	590	83590244	83589697	8e-47	192	107	M
NorthernBobwhite_SimpleDeNovo_contig_100253	gi|224381666|ref|NC_011462.1_TGU1|	70.06	157	31	4	20	166	3598232	3598382	2e-09	68	48	M
NorthernBobwhite_SimpleDeNovo_contig_100448	gi|224381666|ref|NC_011462.1_TGU1|	70.06	2368	518	54	310	2550	82107754	82110057	0	1003	1601	M
NorthernBobwhite_SimpleDeNovo_contig_100459	gi|224381666|ref|NC_011462.1_TGU1|	89.47	38	4	0	447	484	27783854	27783891	0.0002	51.8	54	M
NorthernBobwhite_SimpleDeNovo_contig_100460	gi|224381666|ref|NC_011462.1_TGU1|	76.8	194	41	3	66	258	27577452	27577642	1e-30	138	88	M
NorthernBobwhite_SimpleDeNovo_contig_100543	gi|224381666|ref|NC_011462.1_TGU1|	93.33	30	2	0	7550	7579	80463854	80463883	0.13	46.4	22	M
NorthernBobwhite_SimpleDeNovo_contig_100564	gi|224381666|ref|NC_011462.1_TGU1|	87.5	32	4	0	290	321	58255497	58255528	0.17	41	23	M
NorthernBobwhite_SimpleDeNovo_contig_100573	gi|224381666|ref|NC_011462.1_TGU1|	87.18	39	4	1	179	216	85397218	85397180	0.018	44.6	133	M
NorthernBobwhite_SimpleDeNovo_contig_100587	gi|224381666|ref|NC_011462.1_TGU1|	68.69	396	100	11	104	477	57159543	57159936	1e-26	127	388	M
NorthernBobwhite_SimpleDeNovo_contig_100623	gi|224381666|ref|NC_011462.1_TGU1|	66.44	3322	766	84	2062	5102	17989219	17985966	0	901	170	M
NorthernBobwhite_SimpleDeNovo_contig_100625	gi|224381666|ref|NC_011462.1_TGU1|	70.58	503	111	19	277	749	25897204	25897699	3e-45	188	107	M
NorthernBobwhite_SimpleDeNovo_contig_100669	gi|224381666|ref|NC_011462.1_TGU1|	72.65	3123	632	58	1479	4501	20351728	20354728	0	1721	12354	M
NorthernBobwhite_SimpleDeNovo_contig_100761	gi|224381666|ref|NC_011462.1_TGU1|	88.89	72	8	0	52	123	95389271	95389342	6e-17	95.1	2621	M
NorthernBobwhite_SimpleDeNovo_contig_100803	gi|224381666|ref|NC_011462.1_TGU1|	71.28	592	125	12	2691	3270	3755691	3755133	1e-74	288	4206	M
NorthernBobwhite_SimpleDeNovo_contig_100806	gi|224381666|ref|NC_011462.1_TGU1|	72.83	552	103	9	175	717	47905981	47905468	2e-85	322	143	M
NorthernBobwhite_SimpleDeNovo_contig_100840	gi|224381666|ref|NC_011462.1_TGU1|	76.1	318	59	3	556	868	4226884	4226579	2e-58	233	218	M
NorthernBobwhite_SimpleDeNovo_contig_100869	gi|224381666|ref|NC_011462.1_TGU1|	76.47	561	127	4	59	616	47449093	47448535	2e-110	403	105	M
NorthernBobwhite_SimpleDeNovo_contig_101074	gi|224381666|ref|NC_011462.1_TGU1|	73.17	630	139	14	271	887	26620528	26621140	1e-90	338	163	M
NorthernBobwhite_SimpleDeNovo_contig_101266	gi|224381666|ref|NC_011462.1_TGU1|	70.75	964	234	22	3168	4117	2607841	2608770	1e-111	412	1174	M
NorthernBobwhite_SimpleDeNovo_contig_10136	gi|224381666|ref|NC_011462.1_TGU1|	74.34	4201	772	75	10359	14377	68293641	68297717	0	2654	274	M
NorthernBobwhite_SimpleDeNovo_contig_101387	gi|224381666|ref|NC_011462.1_TGU1|	82.35	51	6	1	77	127	74048824	74048871	0.0007	50	174	M
NorthernBobwhite_SimpleDeNovo_contig_101431	gi|224381666|ref|NC_011462.1_TGU1|	80	100	19	1	1	99	83340259	83340160	6e-15	87.8	3955	M
NorthernBobwhite_SimpleDeNovo_contig_101478	gi|224381666|ref|NC_011462.1_TGU1|	73.1	145	38	1	402	546	3599506	3599649	1e-13	82.4	74	M
NorthernBobwhite_SimpleDeNovo_contig_10160	gi|224381666|ref|NC_011462.1_TGU1|	80.87	183	34	1	716	898	32426880	32426699	2e-39	168	18339	M
NorthernBobwhite_SimpleDeNovo_contig_101705	gi|224381666|ref|NC_011462.1_TGU1|	72.84	405	82	9	1511	1889	105837470	105837068	5e-54	219	2530	M
NorthernBobwhite_SimpleDeNovo_contig_10178	gi|224381666|ref|NC_011462.1_TGU1|	69.85	587	134	13	4660	5215	45601684	45602258	2e-60	241	4981	M
NorthernBobwhite_SimpleDeNovo_contig_101783	gi|224381666|ref|NC_011462.1_TGU1|	86.36	44	4	2	598	639	64701185	64701228	0.031	46.4	87	M
NorthernBobwhite_SimpleDeNovo_contig_101812	gi|224381666|ref|NC_011462.1_TGU1|	75.29	344	72	9	7	349	23863847	23863516	1e-51	208	165	M
NorthernBobwhite_SimpleDeNovo_contig_101824	gi|224381666|ref|NC_011462.1_TGU1|	75.18	568	117	8	3662	4205	73617162	73616595	9e-101	374	3562	M
NorthernBobwhite_SimpleDeNovo_contig_101876	gi|224381666|ref|NC_011462.1_TGU1|	70.62	4278	840	110	1329	5428	114331647	114327609	0	1929	116	M
NorthernBobwhite_SimpleDeNovo_contig_101953	gi|224381666|ref|NC_011462.1_TGU1|	70.86	151	37	4	43	191	9116294	9116439	5e-08	62.6	100	M
NorthernBobwhite_SimpleDeNovo_contig_101980	gi|224381666|ref|NC_011462.1_TGU1|	83.54	492	64	7	3746	4227	57101183	57100699	2e-140	506	4519	M
NorthernBobwhite_SimpleDeNovo_contig_101987	gi|224381666|ref|NC_011462.1_TGU1|	69.18	4410	933	131	3129	7269	68058700	68062952	0	1620	21011	M
NorthernBobwhite_SimpleDeNovo_contig_102011	gi|224381666|ref|NC_011462.1_TGU1|	85.47	172	25	0	69	240	9466481	9466310	8e-48	197	7440	M
NorthernBobwhite_SimpleDeNovo_contig_102039	gi|224381666|ref|NC_011462.1_TGU1|	90.48	42	4	0	149	190	117087685	117087644	1e-05	59	43	M
NorthernBobwhite_SimpleDeNovo_contig_102384	gi|224381666|ref|NC_011462.1_TGU1|	68.54	963	226	28	143	1057	77608906	77607973	3e-83	315	21298	M
NorthernBobwhite_SimpleDeNovo_contig_102601	gi|224381666|ref|NC_011462.1_TGU1|	87.8	492	50	3	185	667	2826756	2826266	1e-172	612	133	M
NorthernBobwhite_SimpleDeNovo_contig_102874	gi|224381666|ref|NC_011462.1_TGU1|	72.81	2416	473	63	53	2374	6851252	6848927	0	1278	68	M
NorthernBobwhite_SimpleDeNovo_contig_102875	gi|224381666|ref|NC_011462.1_TGU1|	72.49	607	115	14	6	581	6851275	6851860	1e-86	325	267	M
NorthernBobwhite_SimpleDeNovo_contig_10292	gi|224381666|ref|NC_011462.1_TGU1|	78.8	3062	470	52	4436	7459	60410675	60407755	0	2524	36932	M
NorthernBobwhite_SimpleDeNovo_contig_102976	gi|224381666|ref|NC_011462.1_TGU1|	72.06	272	62	6	2	267	104990097	104990360	4e-29	134	1468	M
NorthernBobwhite_SimpleDeNovo_contig_103034	gi|224381666|ref|NC_011462.1_TGU1|	76.11	473	101	6	10	481	27009558	27010019	4e-87	327	5914	M
NorthernBobwhite_SimpleDeNovo_contig_10313	gi|224381666|ref|NC_011462.1_TGU1|	68.69	4046	844	118	1	3824	76956633	76960477	0	1434	47087	M
NorthernBobwhite_SimpleDeNovo_contig_103195	gi|224381666|ref|NC_011462.1_TGU1|	66.83	2237	507	66	2977	5124	29106359	29108449	1e-169	603	238	M
NorthernBobwhite_SimpleDeNovo_contig_103253	gi|224381666|ref|NC_011462.1_TGU1|	79.65	172	25	7	1036	1202	3248242	3248408	1e-27	131	575	M
NorthernBobwhite_SimpleDeNovo_contig_103315	gi|224381666|ref|NC_011462.1_TGU1|	73.23	818	161	26	300	1078	18709749	18708951	4e-115	423	861	M
NorthernBobwhite_SimpleDeNovo_contig_103421	gi|224381666|ref|NC_011462.1_TGU1|	76.61	1069	179	14	131	1138	93308558	93309616	0	801	66	M
NorthernBobwhite_SimpleDeNovo_contig_103471	gi|224381666|ref|NC_011462.1_TGU1|	91.43	35	3	0	13466	13500	12252721	12252755	0.018	50	87	M
NorthernBobwhite_SimpleDeNovo_contig_10364	gi|224381666|ref|NC_011462.1_TGU1|	75.54	1660	317	31	3039	4640	79059618	79061246	0	1104	6624	M
NorthernBobwhite_SimpleDeNovo_contig_103651	gi|224381666|ref|NC_011462.1_TGU1|	67.18	2148	481	67	26	2078	75216163	75214145	2e-167	596	20400	M
NorthernBobwhite_SimpleDeNovo_contig_103738	gi|224381666|ref|NC_011462.1_TGU1|	66.8	244	75	4	191	433	71783938	71783700	8e-08	62.6	42	M
NorthernBobwhite_SimpleDeNovo_contig_103805	gi|224381666|ref|NC_011462.1_TGU1|	74.19	93	24	0	1	93	44760243	44760151	2e-07	60.8	89	M
NorthernBobwhite_SimpleDeNovo_contig_103809	gi|224381666|ref|NC_011462.1_TGU1|	68.85	1175	319	23	174	1331	18198768	18197624	2e-111	408	6425	M
NorthernBobwhite_SimpleDeNovo_contig_104034	gi|224381666|ref|NC_011462.1_TGU1|	81.01	79	14	1	1697	1775	42671374	42671297	7e-10	71.6	139	M
NorthernBobwhite_SimpleDeNovo_contig_104119	gi|224381666|ref|NC_011462.1_TGU1|	75.2	1468	304	23	6	1448	33238922	33237490	0	957	497	M
NorthernBobwhite_SimpleDeNovo_contig_104165	gi|224381666|ref|NC_011462.1_TGU1|	72.38	2411	494	43	1240	3559	85951915	85949586	0	1306	6628	M
NorthernBobwhite_SimpleDeNovo_contig_104194	gi|224381666|ref|NC_011462.1_TGU1|	64.94	1800	394	50	916	2628	107642425	107644074	7e-106	390	85	M
NorthernBobwhite_SimpleDeNovo_contig_10444	gi|224381666|ref|NC_011462.1_TGU1|	85.7	2966	357	17	148	3057	59799470	59796516	0	3422	106	M
NorthernBobwhite_SimpleDeNovo_contig_104499	gi|224381666|ref|NC_011462.1_TGU1|	79.8	604	95	9	19	601	74243918	74243321	3e-146	524	139	M
NorthernBobwhite_SimpleDeNovo_contig_104502	gi|224381666|ref|NC_011462.1_TGU1|	68.37	1758	403	44	2938	4635	98178113	98176449	2e-169	603	15947	M
NorthernBobwhite_SimpleDeNovo_contig_104599	gi|224381666|ref|NC_011462.1_TGU1|	82.21	163	28	1	2069	2230	64208146	64208308	2e-36	159	551	M
NorthernBobwhite_SimpleDeNovo_contig_104702	gi|224381666|ref|NC_011462.1_TGU1|	68.42	266	69	5	1	265	70627784	70627533	4e-17	93.3	408	M
NorthernBobwhite_SimpleDeNovo_contig_104718	gi|224381666|ref|NC_011462.1_TGU1|	81.4	86	14	1	213	296	15133315	15133230	2e-13	80.6	3081	M
NorthernBobwhite_SimpleDeNovo_contig_104796	gi|224381666|ref|NC_011462.1_TGU1|	82.39	761	111	11	50	795	87460980	87461732	0	740	24755	M
NorthernBobwhite_SimpleDeNovo_contig_10480	gi|224381666|ref|NC_011462.1_TGU1|	70.22	1649	361	41	6650	8209	40840715	40842322	0	693	14962	M
NorthernBobwhite_SimpleDeNovo_contig_10483	gi|224381666|ref|NC_011462.1_TGU1|	70.5	583	121	14	49	604	110837264	110836706	3e-66	259	546	M
NorthernBobwhite_SimpleDeNovo_contig_10003	gi|224381666|ref|NC_011462.1_TGU1|	74.91	1965	382	40	2338	4225	61928052	61929982	0	1242	10875	M
NorthernBobwhite_SimpleDeNovo_contig_100060	gi|224381666|ref|NC_011462.1_TGU1|	76.99	1408	261	26	4227	5602	28966004	28964628	0	1018	87	M
NorthernBobwhite_SimpleDeNovo_contig_100103	gi|224381666|ref|NC_011462.1_TGU1|	91.18	34	2	1	80	112	6996694	6996727	0.026	44.6	72	M
NorthernBobwhite_SimpleDeNovo_contig_100116	gi|224381666|ref|NC_011462.1_TGU1|	77.74	575	107	10	2305	2871	59038967	59039528	9e-119	434	1731	M
NorthernBobwhite_SimpleDeNovo_contig_10025	gi|224381666|ref|NC_011462.1_TGU1|	71.15	1404	293	41	8513	9875	116262673	116261341	3e-175	623	152	M
NorthernBobwhite_SimpleDeNovo_contig_100483	gi|224381666|ref|NC_011462.1_TGU1|	71.4	542	110	10	665	1196	86714638	86714132	7e-71	275	37385	M
NorthernBobwhite_SimpleDeNovo_contig_100544	gi|224381666|ref|NC_011462.1_TGU1|	86.49	37	3	1	266	300	11670536	11670572	0.045	42.8	167	M
NorthernBobwhite_SimpleDeNovo_contig_100610	gi|224381666|ref|NC_011462.1_TGU1|	70.21	4072	940	80	16	3973	13545040	13541128	0	1761	89	M
NorthernBobwhite_SimpleDeNovo_contig_100627	gi|224381666|ref|NC_011462.1_TGU1|	76.71	949	169	12	172	1110	4523574	4524480	0	708	35	M
NorthernBobwhite_SimpleDeNovo_contig_100668	gi|224381666|ref|NC_011462.1_TGU1|	75.64	702	142	12	420	1101	20350213	20349521	1e-129	468	163	M
NorthernBobwhite_SimpleDeNovo_contig_100679	gi|224381666|ref|NC_011462.1_TGU1|	70.98	958	214	26	4	931	31301943	31302866	6e-114	416	101	M
NorthernBobwhite_SimpleDeNovo_contig_100680	gi|224381666|ref|NC_011462.1_TGU1|	71.89	950	197	25	75	992	31300691	31299780	3e-127	461	70	M
NorthernBobwhite_SimpleDeNovo_contig_100709	gi|224381666|ref|NC_011462.1_TGU1|	78.95	342	70	2	46	386	60232230	60231890	3e-74	286	7000	M
NorthernBobwhite_SimpleDeNovo_contig_100765	gi|224381666|ref|NC_011462.1_TGU1|	72.11	294	43	10	1469	1760	111601827	111602083	7e-34	150	432	M
NorthernBobwhite_SimpleDeNovo_contig_1008	gi|224381666|ref|NC_011462.1_TGU1|	68.57	455	118	13	81	519	29649344	29649789	4e-31	140	18	M
NorthernBobwhite_SimpleDeNovo_contig_100818	gi|224381666|ref|NC_011462.1_TGU1|	69.81	540	136	9	886	1414	45139980	45139457	3e-55	223	10752	M
NorthernBobwhite_SimpleDeNovo_contig_100909	gi|224381666|ref|NC_011462.1_TGU1|	71.36	803	166	25	5690	6450	15061620	15062400	4e-95	356	14549	M
NorthernBobwhite_SimpleDeNovo_contig_100914	gi|224381666|ref|NC_011462.1_TGU1|	77.49	1528	254	24	787	2265	109525911	109527397	0	1178	64	M
NorthernBobwhite_SimpleDeNovo_contig_100927	gi|224381666|ref|NC_011462.1_TGU1|	71.92	1421	319	28	5290	6640	8820764	8822174	0	710	3511	M
NorthernBobwhite_SimpleDeNovo_contig_100994	gi|224381666|ref|NC_011462.1_TGU1|	67.63	1931	395	50	1045	2830	83459170	83461015	0	646	121	M
NorthernBobwhite_SimpleDeNovo_contig_101202	gi|224381666|ref|NC_011462.1_TGU1|	72.75	367	75	9	1232	1593	62321094	62321440	6e-47	194	59	M
NorthernBobwhite_SimpleDeNovo_contig_101211	gi|224381666|ref|NC_011462.1_TGU1|	77.04	540	85	12	2344	2857	21831906	21831380	2e-107	396	2714	M
NorthernBobwhite_SimpleDeNovo_contig_101310	gi|224381666|ref|NC_011462.1_TGU1|	80.65	124	20	3	13	133	102336792	102336914	8e-21	105	10541	M
NorthernBobwhite_SimpleDeNovo_contig_101425	gi|224381666|ref|NC_011462.1_TGU1|	80.53	863	108	19	1416	2257	92839719	92840542	0	767	110	M
NorthernBobwhite_SimpleDeNovo_contig_101466	gi|224381666|ref|NC_011462.1_TGU1|	65.1	510	135	11	511	1002	78734743	78734259	4e-21	107	223	M
NorthernBobwhite_SimpleDeNovo_contig_101490	gi|224381666|ref|NC_011462.1_TGU1|	71.7	417	103	9	1236	1646	74087380	74087787	4e-51	208	11437	M
NorthernBobwhite_SimpleDeNovo_contig_101520	gi|224381666|ref|NC_011462.1_TGU1|	89.25	279	25	4	365	642	102514164	102514438	5e-95	354	1043	M
NorthernBobwhite_SimpleDeNovo_contig_101521	gi|224381666|ref|NC_011462.1_TGU1|	75.22	1037	206	21	5	1008	102513215	102512197	0	663	104	M
NorthernBobwhite_SimpleDeNovo_contig_101545	gi|224381666|ref|NC_011462.1_TGU1|	72.73	99	19	1	5	95	87429255	87429157	2e-07	60.8	52	M
NorthernBobwhite_SimpleDeNovo_contig_101667	gi|224381666|ref|NC_011462.1_TGU1|	77.19	171	23	5	508	671	87427788	87427627	1e-26	125	11472	M
NorthernBobwhite_SimpleDeNovo_contig_101757	gi|224381666|ref|NC_011462.1_TGU1|	96	25	1	0	253	277	6855640	6855616	0.15	41	34	M
NorthernBobwhite_SimpleDeNovo_contig_10176	gi|224381666|ref|NC_011462.1_TGU1|	70.83	833	192	18	1672	2479	70208928	70208122	5e-100	372	3153	M
NorthernBobwhite_SimpleDeNovo_contig_101777	gi|224381666|ref|NC_011462.1_TGU1|	73.8	229	43	4	1731	1957	2798597	2798384	2e-30	140	147	M
NorthernBobwhite_SimpleDeNovo_contig_101994	gi|224381666|ref|NC_011462.1_TGU1|	72.84	324	62	6	130	441	8096615	8096924	2e-44	185	143	M
NorthernBobwhite_SimpleDeNovo_contig_102152	gi|224381666|ref|NC_011462.1_TGU1|	69.48	5622	1242	146	2491	7875	8432206	8437590	0	2172	3502	M
NorthernBobwhite_SimpleDeNovo_contig_102312	gi|224381666|ref|NC_011462.1_TGU1|	76.68	3233	575	46	2088	5234	103012095	103008956	0	2385	71	M
NorthernBobwhite_SimpleDeNovo_contig_102392	gi|224381666|ref|NC_011462.1_TGU1|	76.41	691	137	8	162	835	58970524	58971205	2e-138	499	126	M
NorthernBobwhite_SimpleDeNovo_contig_102399	gi|224381666|ref|NC_011462.1_TGU1|	67.26	2138	485	61	61	2108	8626621	8624609	1e-174	619	607	M
NorthernBobwhite_SimpleDeNovo_contig_102453	gi|224381666|ref|NC_011462.1_TGU1|	70.87	1857	401	40	3035	4801	8810886	8812692	0	856	5601	M
NorthernBobwhite_SimpleDeNovo_contig_102482	gi|224381666|ref|NC_011462.1_TGU1|	71.24	1408	245	29	2001	3302	29005623	29004270	0	728	290	M
NorthernBobwhite_SimpleDeNovo_contig_102686	gi|224381666|ref|NC_011462.1_TGU1|	66.94	487	110	15	25	486	81122563	81123023	4e-28	131	105	M
NorthernBobwhite_SimpleDeNovo_contig_102704	gi|224381666|ref|NC_011462.1_TGU1|	66.06	937	219	21	347	1237	67410897	67411780	3e-64	251	1049	M
NorthernBobwhite_SimpleDeNovo_contig_102729	gi|224381666|ref|NC_011462.1_TGU1|	75.7	1103	202	20	1	1072	46327966	46329033	0	751	86	M
NorthernBobwhite_SimpleDeNovo_contig_102790	gi|224381666|ref|NC_011462.1_TGU1|	74.07	1018	182	29	558	1551	99332220	99333179	2e-165	589	1185	M
NorthernBobwhite_SimpleDeNovo_contig_102975	gi|224381666|ref|NC_011462.1_TGU1|	73.8	664	120	18	1261	1907	104988155	104987529	9e-103	381	211	M
NorthernBobwhite_SimpleDeNovo_contig_103152	gi|224381666|ref|NC_011462.1_TGU1|	71.92	1104	225	28	125	1188	89847919	89848977	4e-152	544	50	M
NorthernBobwhite_SimpleDeNovo_contig_103219	gi|224381666|ref|NC_011462.1_TGU1|	82.24	957	161	5	5299	6252	100745770	100746720	0	946	118	M
NorthernBobwhite_SimpleDeNovo_contig_103228	gi|224381666|ref|NC_011462.1_TGU1|	67	2094	430	67	1502	3463	115522990	115521026	5e-167	594	3561	M
NorthernBobwhite_SimpleDeNovo_contig_103249	gi|224381666|ref|NC_011462.1_TGU1|	68.24	1697	415	37	1511	3118	74882247	74880586	2e-161	576	247	M
NorthernBobwhite_SimpleDeNovo_contig_103342	gi|224381666|ref|NC_011462.1_TGU1|	100	22	0	0	75	96	98689403	98689424	0.18	41	67	M
NorthernBobwhite_SimpleDeNovo_contig_103452	gi|224381666|ref|NC_011462.1_TGU1|	76.74	129	29	1	121	249	103578292	103578165	6e-17	95.1	70	M
NorthernBobwhite_SimpleDeNovo_contig_103469	gi|224381666|ref|NC_011462.1_TGU1|	72.4	2395	487	53	306	2617	95091515	95093818	0	1258	1259	M
NorthernBobwhite_SimpleDeNovo_contig_103532	gi|224381666|ref|NC_011462.1_TGU1|	84.29	4629	528	73	1482	6003	83418648	83423184	0	4920	4264	M
NorthernBobwhite_SimpleDeNovo_contig_103583	gi|224381666|ref|NC_011462.1_TGU1|	70.68	590	152	11	1	579	49848037	49848616	4e-65	253	2669	M
NorthernBobwhite_SimpleDeNovo_contig_103620	gi|224381666|ref|NC_011462.1_TGU1|	71.74	1741	376	39	1632	3327	100537073	100538742	0	850	163	M
NorthernBobwhite_SimpleDeNovo_contig_103658	gi|224381666|ref|NC_011462.1_TGU1|	67.98	1296	290	37	1178	2419	54004410	54003186	3e-112	412	131	M
NorthernBobwhite_SimpleDeNovo_contig_10373	gi|224381666|ref|NC_011462.1_TGU1|	70.14	663	141	17	565	1205	81192900	81192273	4e-72	279	133	M
NorthernBobwhite_SimpleDeNovo_contig_103863	gi|224381666|ref|NC_011462.1_TGU1|	78.16	403	74	9	533	925	8429278	8428880	2e-79	302	144	M
NorthernBobwhite_SimpleDeNovo_contig_103875	gi|224381666|ref|NC_011462.1_TGU1|	70.74	188	43	4	170	347	87128053	87128238	3e-14	84.2	30	M
NorthernBobwhite_SimpleDeNovo_contig_103940	gi|224381666|ref|NC_011462.1_TGU1|	73.39	109	29	0	76	184	12945386	12945278	7e-09	66.2	69	M
NorthernBobwhite_SimpleDeNovo_contig_104041	gi|224381666|ref|NC_011462.1_TGU1|	64.96	1792	397	50	1978	3663	11239848	11241514	2e-103	383	582	M
NorthernBobwhite_SimpleDeNovo_contig_104101	gi|224381666|ref|NC_011462.1_TGU1|	81.72	673	98	12	4890	5559	58953422	58954072	4e-177	628	10918	M
NorthernBobwhite_SimpleDeNovo_contig_104281	gi|224381666|ref|NC_011462.1_TGU1|	73.77	366	80	4	5130	5485	74395340	74395699	2e-55	224	3234	M
NorthernBobwhite_SimpleDeNovo_contig_104288	gi|224381666|ref|NC_011462.1_TGU1|	79.45	793	138	11	150	924	15534234	15535019	0	668	54	M
NorthernBobwhite_SimpleDeNovo_contig_104469	gi|224381666|ref|NC_011462.1_TGU1|	69.6	1079	236	25	65	1086	46246584	46245541	9e-120	437	14412	M
NorthernBobwhite_SimpleDeNovo_contig_104526	gi|224381666|ref|NC_011462.1_TGU1|	75.47	159	29	2	2669	2817	32454902	32455060	1e-21	111	4753	M
NorthernBobwhite_SimpleDeNovo_contig_104716	gi|224381666|ref|NC_011462.1_TGU1|	72.21	493	99	12	2850	3318	78530579	78531057	1e-63	251	6364	M
NorthernBobwhite_SimpleDeNovo_contig_10473	gi|224381666|ref|NC_011462.1_TGU1|	70.07	608	144	18	3969	4555	96723389	96722799	4e-57	230	746	M
NorthernBobwhite_SimpleDeNovo_contig_104803	gi|224381666|ref|NC_011462.1_TGU1|	77.66	479	92	5	449	923	15327501	15327034	1e-100	372	125	M
NorthernBobwhite_SimpleDeNovo_contig_104879	gi|224381666|ref|NC_011462.1_TGU1|	73.63	364	88	6	942	1299	18320666	18321027	3e-50	205	12337	M
NorthernBobwhite_SimpleDeNovo_contig_100088	gi|224381666|ref|NC_011462.1_TGU1|	72.92	336	73	6	5	323	32445505	32445171	1e-44	185	4801	M
NorthernBobwhite_SimpleDeNovo_contig_100121	gi|224381666|ref|NC_011462.1_TGU1|	93.51	185	11	1	241	425	26451718	26451535	5e-72	277	80	M
NorthernBobwhite_SimpleDeNovo_contig_100133	gi|224381666|ref|NC_011462.1_TGU1|	73.47	98	17	2	11369	11466	14744268	14744180	3e-05	59	50	M
NorthernBobwhite_SimpleDeNovo_contig_100187	gi|224381666|ref|NC_011462.1_TGU1|	78.72	141	30	0	387	527	18497405	18497265	4e-25	120	48	M
NorthernBobwhite_SimpleDeNovo_contig_100197	gi|224381666|ref|NC_011462.1_TGU1|	71.53	144	35	4	188	328	46775499	46775359	6e-08	62.6	118	M
NorthernBobwhite_SimpleDeNovo_contig_100230	gi|224381666|ref|NC_011462.1_TGU1|	69.26	2043	398	61	2679	4579	84395226	84393272	0	785	31247	M
NorthernBobwhite_SimpleDeNovo_contig_100426	gi|224381666|ref|NC_011462.1_TGU1|	73.37	597	115	15	58	633	79028950	79029523	9e-89	333	6991	M
NorthernBobwhite_SimpleDeNovo_contig_100427	gi|224381666|ref|NC_011462.1_TGU1|	73.59	1136	225	22	7570	8640	79030975	79029850	0	664	6283	M
NorthernBobwhite_SimpleDeNovo_contig_100584	gi|224381666|ref|NC_011462.1_TGU1|	75.91	1428	268	23	6729	8121	74129105	74130491	0	989	134	M
NorthernBobwhite_SimpleDeNovo_contig_100591	gi|224381666|ref|NC_011462.1_TGU1|	69.6	3046	588	72	890	3717	116885182	116882257	0	1299	241	M
NorthernBobwhite_SimpleDeNovo_contig_10064	gi|224381666|ref|NC_011462.1_TGU1|	71.39	2891	551	80	2026	4818	63635157	63632445	0	1373	7208	M
NorthernBobwhite_SimpleDeNovo_contig_10072	gi|224381666|ref|NC_011462.1_TGU1|	77.05	122	24	2	4245	4362	7061213	7061334	2e-14	89.7	223	M
NorthernBobwhite_SimpleDeNovo_contig_100791	gi|224381666|ref|NC_011462.1_TGU1|	79.07	387	76	3	969	1352	101491570	101491186	1e-85	324	1313	M
NorthernBobwhite_SimpleDeNovo_contig_10083	gi|224381666|ref|NC_011462.1_TGU1|	66.18	346	89	9	22	358	98550060	98549734	2e-13	82.4	78	M
NorthernBobwhite_SimpleDeNovo_contig_100879	gi|224381666|ref|NC_011462.1_TGU1|	70.66	2488	486	60	672	3023	74780192	74782571	0	1146	4381	M
NorthernBobwhite_SimpleDeNovo_contig_100896	gi|224381666|ref|NC_011462.1_TGU1|	75.63	1186	218	23	206	1325	31870800	31869620	0	796	1246	M
NorthernBobwhite_SimpleDeNovo_contig_10090	gi|224381666|ref|NC_011462.1_TGU1|	73.03	5717	1183	111	2	5530	107179247	107184792	0	3182	8319	M
NorthernBobwhite_SimpleDeNovo_contig_101048	gi|224381666|ref|NC_011462.1_TGU1|	87.1	93	12	0	192	284	117802349	117802257	1e-23	114	1284	M
NorthernBobwhite_SimpleDeNovo_contig_101099	gi|224381666|ref|NC_011462.1_TGU1|	71.14	3281	672	71	2233	5370	94750741	94747593	0	1575	44	M
NorthernBobwhite_SimpleDeNovo_contig_101138	gi|224381666|ref|NC_011462.1_TGU1|	72.17	406	89	8	10	395	51360087	51359686	1e-50	208	4599	M
NorthernBobwhite_SimpleDeNovo_contig_101186	gi|224381666|ref|NC_011462.1_TGU1|	92.86	28	2	0	409	436	7807002	7807029	0.076	42.8	31	M
NorthernBobwhite_SimpleDeNovo_contig_101281	gi|224381666|ref|NC_011462.1_TGU1|	74.77	111	21	3	179	282	95206686	95206576	1e-09	68	62	M
NorthernBobwhite_SimpleDeNovo_contig_101379	gi|224381666|ref|NC_011462.1_TGU1|	70.82	2121	486	45	971	3019	60420568	60422627	0	951	126	M
NorthernBobwhite_SimpleDeNovo_contig_101434	gi|224381666|ref|NC_011462.1_TGU1|	77.28	6038	977	122	2	5872	29945430	29951239	0	4513	69	M
NorthernBobwhite_SimpleDeNovo_contig_101668	gi|224381666|ref|NC_011462.1_TGU1|	67.28	926	230	25	545	1422	18994217	18995117	1e-65	257	6123	M
NorthernBobwhite_SimpleDeNovo_contig_101679	gi|224381666|ref|NC_011462.1_TGU1|	72.53	1347	250	30	251	1530	36677850	36679143	0	735	198	M
NorthernBobwhite_SimpleDeNovo_contig_10196	gi|224381666|ref|NC_011462.1_TGU1|	92.4	408	31	0	1007	1414	102955509	102955916	2e-167	596	851	M
NorthernBobwhite_SimpleDeNovo_contig_101995	gi|224381666|ref|NC_011462.1_TGU1|	66.26	1073	258	36	305	1335	3209866	3208856	2e-59	235	3970	M
NorthernBobwhite_SimpleDeNovo_contig_102101	gi|224381666|ref|NC_011462.1_TGU1|	76.58	158	37	0	161	318	63173928	63173771	7e-25	118	1327	M
NorthernBobwhite_SimpleDeNovo_contig_102121	gi|224381666|ref|NC_011462.1_TGU1|	90.57	53	5	0	201	253	18504378	18504430	3e-11	73.4	2447	M
NorthernBobwhite_SimpleDeNovo_contig_102228	gi|224381666|ref|NC_011462.1_TGU1|	68.55	1819	413	42	821	2518	87622384	87620604	0	655	6642	M
NorthernBobwhite_SimpleDeNovo_contig_102250	gi|224381666|ref|NC_011462.1_TGU1|	67.68	560	126	14	2114	2645	18401988	18401456	7e-43	181	939	M
NorthernBobwhite_SimpleDeNovo_contig_102363	gi|224381666|ref|NC_011462.1_TGU1|	74.05	736	136	12	12088	12783	35975111	35974391	9e-127	462	8893	M
NorthernBobwhite_SimpleDeNovo_contig_102415	gi|224381666|ref|NC_011462.1_TGU1|	74.38	562	106	10	1695	2235	88645561	88645017	2e-94	354	4840	M
NorthernBobwhite_SimpleDeNovo_contig_102541	gi|224381666|ref|NC_011462.1_TGU1|	70.86	882	203	20	10	862	61773860	61773004	2e-106	390	106	M
NorthernBobwhite_SimpleDeNovo_contig_102830	gi|224381666|ref|NC_011462.1_TGU1|	76.39	466	89	11	2893	3348	16278966	16278512	6e-83	315	2009	M
NorthernBobwhite_SimpleDeNovo_contig_103005	gi|224381666|ref|NC_011462.1_TGU1|	69.6	250	53	7	838	1076	4080888	4081125	3e-18	98.7	93	M
NorthernBobwhite_SimpleDeNovo_contig_103115	gi|224381666|ref|NC_011462.1_TGU1|	66.71	715	160	27	23	699	68962700	68963374	2e-38	165	147	M
NorthernBobwhite_SimpleDeNovo_contig_103186	gi|224381666|ref|NC_011462.1_TGU1|	74.88	426	95	7	1	423	26044540	26044956	3e-69	266	118	M
NorthernBobwhite_SimpleDeNovo_contig_103273	gi|224381666|ref|NC_011462.1_TGU1|	82.92	5381	787	45	414	5743	3593077	3587778	0	5478	115	M
NorthernBobwhite_SimpleDeNovo_contig_103330	gi|224381666|ref|NC_011462.1_TGU1|	73.4	1342	253	28	1311	2594	58183759	58182464	0	778	14508	M
NorthernBobwhite_SimpleDeNovo_contig_103414	gi|224381666|ref|NC_011462.1_TGU1|	67.44	817	197	20	1572	2368	53383720	53382953	3e-62	246	4265	M
NorthernBobwhite_SimpleDeNovo_contig_103458	gi|224381666|ref|NC_011462.1_TGU1|	79.21	683	128	7	1078	1750	100204365	100205043	8e-161	572	64	M
NorthernBobwhite_SimpleDeNovo_contig_103492	gi|224381666|ref|NC_011462.1_TGU1|	69.06	1432	315	35	1153	2530	100186693	100188050	1e-151	544	9605	M
NorthernBobwhite_SimpleDeNovo_contig_103512	gi|224381666|ref|NC_011462.1_TGU1|	73.46	437	78	8	742	1153	13482936	13482513	3e-68	264	96	M
NorthernBobwhite_SimpleDeNovo_contig_103731	gi|224381666|ref|NC_011462.1_TGU1|	74.83	147	25	5	233	368	20794871	20794726	2e-15	87.8	686	M
NorthernBobwhite_SimpleDeNovo_contig_103760	gi|224381666|ref|NC_011462.1_TGU1|	93.21	2756	155	9	8548	11297	12531889	12534618	0	4116	3223	M
NorthernBobwhite_SimpleDeNovo_contig_103871	gi|224381666|ref|NC_011462.1_TGU1|	67.75	1051	225	32	314	1313	4094740	4095727	2e-86	325	33	M
NorthernBobwhite_SimpleDeNovo_contig_10388	gi|224381666|ref|NC_011462.1_TGU1|	72	943	194	19	318	1205	16772201	16773128	2e-135	488	23322	M
NorthernBobwhite_SimpleDeNovo_contig_103886	gi|224381666|ref|NC_011462.1_TGU1|	70.05	1085	239	29	3780	4818	20972424	20973468	3e-120	439	16472	M
NorthernBobwhite_SimpleDeNovo_contig_103965	gi|224381666|ref|NC_011462.1_TGU1|	68.57	490	124	11	227	693	10323687	10323205	6e-39	167	360	M
NorthernBobwhite_SimpleDeNovo_contig_104040	gi|224381666|ref|NC_011462.1_TGU1|	80.36	392	76	1	1937	2327	61081240	61080849	2e-95	356	8527	M
NorthernBobwhite_SimpleDeNovo_contig_104143	gi|224381666|ref|NC_011462.1_TGU1|	72.98	1384	304	34	677	2026	25621748	25623095	0	720	314	M
NorthernBobwhite_SimpleDeNovo_contig_1043	gi|224381666|ref|NC_011462.1_TGU1|	75.94	5346	937	103	2109	7243	25182941	25177734	0	3694	237	M
NorthernBobwhite_SimpleDeNovo_contig_104338	gi|224381666|ref|NC_011462.1_TGU1|	72.21	3681	751	86	2116	5625	79582648	79579069	0	1884	25123	M
NorthernBobwhite_SimpleDeNovo_contig_104341	gi|224381666|ref|NC_011462.1_TGU1|	69.5	1118	257	28	2692	3773	52804266	52805335	6e-117	428	14485	M
NorthernBobwhite_SimpleDeNovo_contig_104447	gi|224381666|ref|NC_011462.1_TGU1|	89.47	57	6	0	304	360	18504368	18504424	8e-12	77	2600	M
NorthernBobwhite_SimpleDeNovo_contig_104498	gi|224381666|ref|NC_011462.1_TGU1|	68.1	558	113	13	14	519	46276231	46275687	3e-50	205	12623	M
NorthernBobwhite_SimpleDeNovo_contig_104578	gi|224381666|ref|NC_011462.1_TGU1|	77.63	1171	210	19	1012	2153	101640134	101638987	0	892	3290	M
NorthernBobwhite_SimpleDeNovo_contig_104613	gi|224381666|ref|NC_011462.1_TGU1|	71.78	946	200	19	5650	6567	35663117	35662211	2e-131	477	141	M
NorthernBobwhite_SimpleDeNovo_contig_104714	gi|224381666|ref|NC_011462.1_TGU1|	76.14	415	84	6	417	830	48349738	48349338	7e-76	289	11704	M
NorthernBobwhite_SimpleDeNovo_contig_104799	gi|224381666|ref|NC_011462.1_TGU1|	79.13	1744	309	14	1937	3677	798410	796719	0	1490	22813	M
NorthernBobwhite_SimpleDeNovo_contig_104841	gi|224381666|ref|NC_011462.1_TGU1|	77.05	610	102	10	984	1576	46507357	46506769	1e-126	459	24842	M
NorthernBobwhite_SimpleDeNovo_contig_104858	gi|224381666|ref|NC_011462.1_TGU1|	74.06	1677	362	21	3670	5295	16602785	16604439	0	1034	11790	M
NorthernBobwhite_SimpleDeNovo_contig_104880	gi|224381666|ref|NC_011462.1_TGU1|	67.93	1375	307	38	2693	3996	92053415	92054726	1e-120	441	444	M
NorthernBobwhite_SimpleDeNovo_contig_105029	gi|224381666|ref|NC_011462.1_TGU1|	74.59	425	78	9	791	1192	48351560	48351977	2e-68	266	65	M
NorthernBobwhite_SimpleDeNovo_contig_105059	gi|224381666|ref|NC_011462.1_TGU1|	69.24	1583	377	33	132	1641	104824984	104823439	3e-172	610	67	M
NorthernBobwhite_SimpleDeNovo_contig_105101	gi|224381666|ref|NC_011462.1_TGU1|	70.41	615	150	16	289	889	4684607	4684011	1e-62	246	60	M
NorthernBobwhite_SimpleDeNovo_contig_105130	gi|224381666|ref|NC_011462.1_TGU1|	72.03	2667	524	54	136	2714	116683614	116686146	0	1404	16676	M
NorthernBobwhite_SimpleDeNovo_contig_105163	gi|224381666|ref|NC_011462.1_TGU1|	92.86	28	0	1	369	396	45669393	45669418	1.2	39.2	15	M
NorthernBobwhite_SimpleDeNovo_contig_105232	gi|224381666|ref|NC_011462.1_TGU1|	69.96	1661	357	43	1648	3248	52713340	52711762	0	681	68	M
NorthernBobwhite_SimpleDeNovo_contig_105251	gi|224381666|ref|NC_011462.1_TGU1|	69.12	842	205	22	1355	2162	84589957	84590777	1e-77	297	3100	M
NorthernBobwhite_SimpleDeNovo_contig_105259	gi|224381666|ref|NC_011462.1_TGU1|	93.67	616	32	4	4	613	95555841	95555227	0	924	52	M
NorthernBobwhite_SimpleDeNovo_contig_105261	gi|224381666|ref|NC_011462.1_TGU1|	74.93	363	84	3	1472	1834	117864904	117865259	7e-60	237	3069	M
NorthernBobwhite_SimpleDeNovo_contig_105343	gi|224381666|ref|NC_011462.1_TGU1|	75.39	512	115	6	3906	4411	98229555	98230061	9e-90	338	5686	M
NorthernBobwhite_SimpleDeNovo_contig_105439	gi|224381666|ref|NC_011462.1_TGU1|	86.96	46	5	1	212	257	28969400	28969356	0.0001	53.6	139	M
NorthernBobwhite_SimpleDeNovo_contig_105520	gi|224381666|ref|NC_011462.1_TGU1|	66.4	1527	366	49	12	1458	83628583	83630042	1e-94	352	197	M
NorthernBobwhite_SimpleDeNovo_contig_10553	gi|224381666|ref|NC_011462.1_TGU1|	68.11	2418	544	60	3476	5767	88129832	88132148	0	820	332	M
NorthernBobwhite_SimpleDeNovo_contig_105573	gi|224381666|ref|NC_011462.1_TGU1|	65.9	393	101	10	859	1245	59516202	59516567	2e-15	89.7	118	M
NorthernBobwhite_SimpleDeNovo_contig_105588	gi|224381666|ref|NC_011462.1_TGU1|	71.94	2733	519	66	217	2853	100666485	100669065	0	1397	104	M
NorthernBobwhite_SimpleDeNovo_contig_105668	gi|224381666|ref|NC_011462.1_TGU1|	86.84	38	5	0	1933	1970	82607082	82607045	0.11	46.4	6	M
NorthernBobwhite_SimpleDeNovo_contig_105682	gi|224381666|ref|NC_011462.1_TGU1|	71.33	607	124	13	513	1093	86553883	86553301	7e-78	297	15347	M
NorthernBobwhite_SimpleDeNovo_contig_10573	gi|224381666|ref|NC_011462.1_TGU1|	69.59	1947	437	49	1870	3757	18366709	18364859	0	762	137	M
NorthernBobwhite_SimpleDeNovo_contig_105787	gi|224381666|ref|NC_011462.1_TGU1|	75.09	542	132	3	610	1151	46743277	46742739	3e-99	367	9430	M
NorthernBobwhite_SimpleDeNovo_contig_100014	gi|224381666|ref|NC_011462.1_TGU1|	69.75	833	174	17	12	798	52688400	52689200	5e-97	360	73	M
NorthernBobwhite_SimpleDeNovo_contig_100072	gi|224381666|ref|NC_011462.1_TGU1|	81.49	1707	242	19	4434	6100	28976337	28974665	0	1635	12868	M
NorthernBobwhite_SimpleDeNovo_contig_100152	gi|224381666|ref|NC_011462.1_TGU1|	77.78	1386	237	23	40	1399	85087895	85086555	0	1072	18594	M
NorthernBobwhite_SimpleDeNovo_contig_100155	gi|224381666|ref|NC_011462.1_TGU1|	85.79	366	47	3	147	508	48686952	48686588	4e-114	417	1798	M
NorthernBobwhite_SimpleDeNovo_contig_100275	gi|224381666|ref|NC_011462.1_TGU1|	64.61	1803	422	55	116	1836	104960132	104958464	3e-85	322	167	M
NorthernBobwhite_SimpleDeNovo_contig_100290	gi|224381666|ref|NC_011462.1_TGU1|	85.96	57	8	0	1223	1279	42716831	42716775	5e-09	68	1893	M
NorthernBobwhite_SimpleDeNovo_contig_100312	gi|224381666|ref|NC_011462.1_TGU1|	77.52	1597	300	20	689	2237	116983386	116984971	0	1225	507	M
NorthernBobwhite_SimpleDeNovo_contig_100331	gi|224381666|ref|NC_011462.1_TGU1|	71.24	233	55	6	139	362	63548166	63548395	2e-19	102	105	M
NorthernBobwhite_SimpleDeNovo_contig_100361	gi|224381666|ref|NC_011462.1_TGU1|	81.53	3811	497	55	136	3831	29422094	29425812	0	3638	150	M
NorthernBobwhite_SimpleDeNovo_contig_100548	gi|224381666|ref|NC_011462.1_TGU1|	66.05	5264	1294	144	818	5770	82582749	82577668	0	1232	5626	M
NorthernBobwhite_SimpleDeNovo_contig_100608	gi|224381666|ref|NC_011462.1_TGU1|	72.45	4418	797	101	6	4187	109818889	109814656	0	2405	2805	M
NorthernBobwhite_SimpleDeNovo_contig_100633	gi|224381666|ref|NC_011462.1_TGU1|	74.37	355	83	6	8	359	24631757	24632106	8e-52	210	14852	M
NorthernBobwhite_SimpleDeNovo_contig_100635	gi|224381666|ref|NC_011462.1_TGU1|	68.58	506	99	17	1	494	117219740	117219283	3e-41	174	137	M
NorthernBobwhite_SimpleDeNovo_contig_100808	gi|224381666|ref|NC_011462.1_TGU1|	79.9	388	63	4	360	738	8878900	8879281	6e-92	343	90	M
NorthernBobwhite_SimpleDeNovo_contig_100841	gi|224381666|ref|NC_011462.1_TGU1|	78.95	190	32	4	1181	1369	4229191	4229373	2e-34	152	1615	M
NorthernBobwhite_SimpleDeNovo_contig_100934	gi|224381666|ref|NC_011462.1_TGU1|	70.49	881	167	29	1229	2040	3554344	3555200	6e-100	370	235	M
NorthernBobwhite_SimpleDeNovo_contig_101013	gi|224381666|ref|NC_011462.1_TGU1|	79.58	142	27	2	3466	3605	50031036	50030895	1e-23	118	8760	M
NorthernBobwhite_SimpleDeNovo_contig_101152	gi|224381666|ref|NC_011462.1_TGU1|	68.18	861	216	23	186	1018	54008650	54007820	2e-68	266	57	M
NorthernBobwhite_SimpleDeNovo_contig_101153	gi|224381666|ref|NC_011462.1_TGU1|	76.17	298	59	3	16	305	43474780	43474487	4e-54	215	89	M
NorthernBobwhite_SimpleDeNovo_contig_101329	gi|224381666|ref|NC_011462.1_TGU1|	67.81	1252	284	39	4991	6170	63276605	63277809	7e-100	372	19422	M
NorthernBobwhite_SimpleDeNovo_contig_101432	gi|224381666|ref|NC_011462.1_TGU1|	82.52	246	35	5	3037	3281	529700	529938	4e-59	235	3869	M
NorthernBobwhite_SimpleDeNovo_contig_101475	gi|224381666|ref|NC_011462.1_TGU1|	71.59	1158	241	28	3	1123	111631212	111632318	1e-156	558	225	M
NorthernBobwhite_SimpleDeNovo_contig_101612	gi|224381666|ref|NC_011462.1_TGU1|	69.87	1958	400	61	4267	6158	74659212	74657379	0	767	137	M
NorthernBobwhite_SimpleDeNovo_contig_10179	gi|224381666|ref|NC_011462.1_TGU1|	68.75	720	151	20	123	772	62791856	62792571	3e-67	260	1740	M
NorthernBobwhite_SimpleDeNovo_contig_101846	gi|224381666|ref|NC_011462.1_TGU1|	73.56	798	156	15	258	1029	35743987	35744755	4e-130	470	96	M
NorthernBobwhite_SimpleDeNovo_contig_10205	gi|224381666|ref|NC_011462.1_TGU1|	78.1	1087	177	18	819	1851	42997060	42998139	0	861	118	M
NorthernBobwhite_SimpleDeNovo_contig_102092	gi|224381666|ref|NC_011462.1_TGU1|	73.42	395	89	6	1222	1608	43146532	43146146	1e-56	226	15261	M
NorthernBobwhite_SimpleDeNovo_contig_102224	gi|224381666|ref|NC_011462.1_TGU1|	74.06	397	90	6	2	397	84123840	84123456	1e-60	237	297	M
NorthernBobwhite_SimpleDeNovo_contig_102240	gi|224381666|ref|NC_011462.1_TGU1|	86.84	38	5	0	1	38	106472537	106472574	0.008	46.4	49	M
NorthernBobwhite_SimpleDeNovo_contig_102267	gi|224381666|ref|NC_011462.1_TGU1|	76.88	493	83	6	505	977	68463347	68463828	6e-102	376	11622	M
NorthernBobwhite_SimpleDeNovo_contig_10241	gi|224381666|ref|NC_011462.1_TGU1|	72.31	195	41	5	2737	2919	5277469	5277276	7e-18	98.7	710	M
NorthernBobwhite_SimpleDeNovo_contig_102515	gi|224381666|ref|NC_011462.1_TGU1|	70.2	641	141	12	485	1113	4455259	4454657	1e-74	286	3669	M
NorthernBobwhite_SimpleDeNovo_contig_102581	gi|224381666|ref|NC_011462.1_TGU1|	69.24	621	152	15	1140	1740	95752593	95753194	2e-56	226	4561	M
NorthernBobwhite_SimpleDeNovo_contig_102583	gi|224381666|ref|NC_011462.1_TGU1|	69.61	918	208	17	1424	2330	23266875	23266018	3e-104	385	12052	M
NorthernBobwhite_SimpleDeNovo_contig_102635	gi|224381666|ref|NC_011462.1_TGU1|	77.39	115	17	2	1011	1125	27170095	27170200	1e-15	89.7	110	M
NorthernBobwhite_SimpleDeNovo_contig_102646	gi|224381666|ref|NC_011462.1_TGU1|	75.53	989	181	17	410	1376	93806353	93805404	0	672	131	M
NorthernBobwhite_SimpleDeNovo_contig_102652	gi|224381666|ref|NC_011462.1_TGU1|	72.26	804	178	17	3677	4449	66693969	66694758	7e-111	408	181	M
NorthernBobwhite_SimpleDeNovo_contig_102687	gi|224381666|ref|NC_011462.1_TGU1|	73.46	2084	380	44	610	2578	81121792	81119767	0	1223	101	M
NorthernBobwhite_SimpleDeNovo_contig_102701	gi|224381666|ref|NC_011462.1_TGU1|	66.17	2566	562	65	401	2823	20448932	20446530	0	697	3253	M
NorthernBobwhite_SimpleDeNovo_contig_102764	gi|224381666|ref|NC_011462.1_TGU1|	74.07	1134	196	28	4413	5484	75934555	75933458	0	682	2696	M
NorthernBobwhite_SimpleDeNovo_contig_102808	gi|224381666|ref|NC_011462.1_TGU1|	70.52	1581	343	36	933	2402	7078263	7076695	0	699	9548	M
NorthernBobwhite_SimpleDeNovo_contig_102819	gi|224381666|ref|NC_011462.1_TGU1|	68.46	707	146	25	1733	2422	3580319	3580965	2e-56	226	4266	M
NorthernBobwhite_SimpleDeNovo_contig_102832	gi|224381666|ref|NC_011462.1_TGU1|	79.58	524	59	12	695	1211	86701124	86701606	2e-124	452	69	M
NorthernBobwhite_SimpleDeNovo_contig_102904	gi|224381666|ref|NC_011462.1_TGU1|	77.71	157	34	1	132	287	83982208	83982052	1e-25	122	2212	M
NorthernBobwhite_SimpleDeNovo_contig_102949	gi|224381666|ref|NC_011462.1_TGU1|	70.89	1343	295	32	230	1545	2502938	2501665	3e-169	601	223	M
NorthernBobwhite_SimpleDeNovo_contig_103089	gi|224381666|ref|NC_011462.1_TGU1|	75.91	137	28	4	106	239	41760018	41759884	1e-14	86	3415	M
NorthernBobwhite_SimpleDeNovo_contig_103140	gi|224381666|ref|NC_011462.1_TGU1|	69.97	646	132	15	1241	1833	75424024	75424660	4e-72	279	15476	M
NorthernBobwhite_SimpleDeNovo_contig_103172	gi|224381666|ref|NC_011462.1_TGU1|	72.52	313	77	6	448	755	25781320	25781012	2e-36	158	1698	M
NorthernBobwhite_SimpleDeNovo_contig_10325	gi|224381666|ref|NC_011462.1_TGU1|	73.73	552	110	7	10530	11064	77482666	77483199	1e-90	342	2701	M
NorthernBobwhite_SimpleDeNovo_contig_103267	gi|224381666|ref|NC_011462.1_TGU1|	73.53	238	49	3	1403	1629	80256111	80256345	3e-32	145	2088	M
NorthernBobwhite_SimpleDeNovo_contig_103291	gi|224381666|ref|NC_011462.1_TGU1|	76.27	1243	249	16	840	2070	3125001	3123793	0	881	6642	M
NorthernBobwhite_SimpleDeNovo_contig_103363	gi|224381666|ref|NC_011462.1_TGU1|	81.82	308	50	3	1779	2081	103198767	103198461	3e-77	295	531	M
NorthernBobwhite_SimpleDeNovo_contig_103388	gi|224381666|ref|NC_011462.1_TGU1|	80.39	51	10	0	975	1025	5526681	5526631	0.004	48.2	96	M
NorthernBobwhite_SimpleDeNovo_contig_103399	gi|224381666|ref|NC_011462.1_TGU1|	86.71	858	93	5	126	973	68267347	68266501	0	1031	127	M
NorthernBobwhite_SimpleDeNovo_contig_103401	gi|224381666|ref|NC_011462.1_TGU1|	70.48	2588	533	59	1883	4313	93125970	93123457	0	1166	77	M
NorthernBobwhite_SimpleDeNovo_contig_103411	gi|224381666|ref|NC_011462.1_TGU1|	67.1	854	199	20	1278	2089	48616145	48616958	8e-66	257	8987	M
NorthernBobwhite_SimpleDeNovo_contig_103413	gi|224381666|ref|NC_011462.1_TGU1|	69.79	437	104	10	242	674	15294242	15293830	3e-41	174	62	M
NorthernBobwhite_SimpleDeNovo_contig_103494	gi|224381666|ref|NC_011462.1_TGU1|	68.77	3269	708	76	4898	7948	118471045	118467872	0	1232	6943	M
NorthernBobwhite_SimpleDeNovo_contig_103505	gi|224381666|ref|NC_011462.1_TGU1|	91.18	34	2	1	581	613	117485610	117485643	0.028	44.6	122	M
NorthernBobwhite_SimpleDeNovo_contig_10370	gi|224381666|ref|NC_011462.1_TGU1|	76.23	2200	385	41	4483	6604	81518106	81520245	0	1550	40987	M
NorthernBobwhite_SimpleDeNovo_contig_10374	gi|224381666|ref|NC_011462.1_TGU1|	68.48	2008	473	47	2192	4113	81197391	81199324	0	700	8673	M
NorthernBobwhite_SimpleDeNovo_contig_103753	gi|224381666|ref|NC_011462.1_TGU1|	64.23	1409	348	43	42	1328	43246757	43248131	3e-53	215	107	M
NorthernBobwhite_SimpleDeNovo_contig_103764	gi|224381666|ref|NC_011462.1_TGU1|	70.61	888	205	18	238	1089	46276540	46275673	1e-106	394	25085	M
NorthernBobwhite_SimpleDeNovo_contig_103770	gi|224381666|ref|NC_011462.1_TGU1|	70.05	3002	656	73	72	2945	45635462	45638348	0	1251	1896	M
NorthernBobwhite_SimpleDeNovo_contig_103772	gi|224381666|ref|NC_011462.1_TGU1|	74.05	1611	330	27	2693	4250	59916016	59914441	0	978	14928	M
NorthernBobwhite_SimpleDeNovo_contig_103777	gi|224381666|ref|NC_011462.1_TGU1|	71.52	323	67	14	879	1195	40746073	40745770	6e-27	127	186	M
NorthernBobwhite_SimpleDeNovo_contig_103842	gi|224381666|ref|NC_011462.1_TGU1|	65.54	621	156	19	20	595	85106312	85106919	1e-25	122	68	M
NorthernBobwhite_SimpleDeNovo_contig_103909	gi|224381666|ref|NC_011462.1_TGU1|	77.52	1557	268	29	1	1522	86007078	86005569	0	1173	33159	M
NorthernBobwhite_SimpleDeNovo_contig_103925	gi|224381666|ref|NC_011462.1_TGU1|	65.08	315	77	8	1150	1455	45040809	45040519	2e-08	66.2	233	M
NorthernBobwhite_SimpleDeNovo_contig_104091	gi|224381666|ref|NC_011462.1_TGU1|	67.48	1968	415	58	4572	6471	70102770	70104580	5e-170	605	10177	M
NorthernBobwhite_SimpleDeNovo_contig_104164	gi|224381666|ref|NC_011462.1_TGU1|	75.84	1337	267	21	10	1319	108086830	108085523	0	911	355	M
NorthernBobwhite_SimpleDeNovo_contig_10425	gi|224381666|ref|NC_011462.1_TGU1|	67.35	2052	435	51	232	2149	23790063	23792013	0	663	7443	M
NorthernBobwhite_SimpleDeNovo_contig_104297	gi|224381666|ref|NC_011462.1_TGU1|	70.18	1593	338	35	4920	6389	109456707	109455129	0	697	82	M
NorthernBobwhite_SimpleDeNovo_contig_104353	gi|224381666|ref|NC_011462.1_TGU1|	68.18	286	65	5	251	533	2320797	2320535	6e-21	107	5537	M
NorthernBobwhite_SimpleDeNovo_contig_104455	gi|224381666|ref|NC_011462.1_TGU1|	72.65	1839	383	35	827	2629	12306848	12305094	0	1000	67	M
NorthernBobwhite_SimpleDeNovo_contig_104642	gi|224381666|ref|NC_011462.1_TGU1|	70.24	1062	219	30	50	1077	46933593	46932595	1e-121	443	214	M
NorthernBobwhite_SimpleDeNovo_contig_104651	gi|224381666|ref|NC_011462.1_TGU1|	67.62	2804	672	78	5207	7899	105322415	105325093	0	825	1327	M
NorthernBobwhite_SimpleDeNovo_contig_104665	gi|224381666|ref|NC_011462.1_TGU1|	63.54	1739	403	64	632	2229	87496892	87495244	7e-48	197	50	M
NorthernBobwhite_SimpleDeNovo_contig_104726	gi|224381666|ref|NC_011462.1_TGU1|	70.99	648	148	16	1	615	27009388	27010028	6e-75	286	4730	M
NorthernBobwhite_SimpleDeNovo_contig_104834	gi|224381666|ref|NC_011462.1_TGU1|	68.5	527	154	6	3	524	1471778	1471259	6e-48	196	238	M
NorthernBobwhite_SimpleDeNovo_contig_104857	gi|224381666|ref|NC_011462.1_TGU1|	76.58	1627	272	30	668	2246	118285231	118286796	0	1180	3033	M
NorthernBobwhite_SimpleDeNovo_contig_104870	gi|224381666|ref|NC_011462.1_TGU1|	71.03	1736	349	43	2734	4412	40916144	40914506	0	809	9276	M
NorthernBobwhite_SimpleDeNovo_contig_105188	gi|224381666|ref|NC_011462.1_TGU1|	78.57	140	21	2	523	660	78124694	78124826	6e-24	116	3782	M
NorthernBobwhite_SimpleDeNovo_contig_105307	gi|224381666|ref|NC_011462.1_TGU1|	71.73	665	114	12	621	1215	63960894	63961554	2e-98	365	136	M
NorthernBobwhite_SimpleDeNovo_contig_105314	gi|224381666|ref|NC_011462.1_TGU1|	74.89	1796	327	35	162	1889	55446834	55448573	0	1160	89	M
NorthernBobwhite_SimpleDeNovo_contig_105340	gi|224381666|ref|NC_011462.1_TGU1|	68.7	2639	582	66	2644	5135	52354834	52357375	0	958	22008	M
NorthernBobwhite_SimpleDeNovo_contig_105354	gi|224381666|ref|NC_011462.1_TGU1|	73.45	3973	734	89	5300	9089	96938938	96942772	0	2296	10672	M
NorthernBobwhite_SimpleDeNovo_contig_105402	gi|224381666|ref|NC_011462.1_TGU1|	78.34	314	52	6	3569	3871	5557597	5557905	2e-62	248	12531	M
NorthernBobwhite_SimpleDeNovo_contig_105403	gi|224381666|ref|NC_011462.1_TGU1|	66.92	1333	308	37	60	1337	41018845	41017591	2e-99	369	57	M
NorthernBobwhite_SimpleDeNovo_contig_105405	gi|224381666|ref|NC_011462.1_TGU1|	68.69	1370	283	47	2895	4178	41023805	41025114	1e-125	457	90	M
NorthernBobwhite_SimpleDeNovo_contig_105466	gi|224381666|ref|NC_011462.1_TGU1|	68.21	909	219	21	1	871	115916754	115915878	7e-81	306	73	M
NorthernBobwhite_SimpleDeNovo_contig_105471	gi|224381666|ref|NC_011462.1_TGU1|	68.82	1286	297	30	1277	2507	15457576	15456340	2e-129	470	149	M
NorthernBobwhite_SimpleDeNovo_contig_105480	gi|224381666|ref|NC_011462.1_TGU1|	81.4	43	5	1	236	278	47123770	47123731	0.15	41	62	M
NorthernBobwhite_SimpleDeNovo_contig_105502	gi|224381666|ref|NC_011462.1_TGU1|	67.98	1452	349	38	31	1419	83470651	83472049	1e-125	455	72	M
NorthernBobwhite_SimpleDeNovo_contig_105507	gi|224381666|ref|NC_011462.1_TGU1|	80.59	438	79	4	5	440	85844370	85844803	9e-108	394	53	M
NorthernBobwhite_SimpleDeNovo_contig_105603	gi|224381666|ref|NC_011462.1_TGU1|	83.76	1139	151	16	80	1189	52458676	52459809	0	1178	129	M
NorthernBobwhite_SimpleDeNovo_contig_105617	gi|224381666|ref|NC_011462.1_TGU1|	81.22	703	113	10	7945	8638	74394077	74394769	0	645	2105	M
NorthernBobwhite_SimpleDeNovo_contig_105717	gi|224381666|ref|NC_011462.1_TGU1|	71.23	810	186	18	5516	6300	71976812	71976025	5e-100	372	139	M
NorthernBobwhite_SimpleDeNovo_contig_105740	gi|224381666|ref|NC_011462.1_TGU1|	86.84	38	5	0	64	101	21053812	21053849	0.005	46.4	98	M
NorthernBobwhite_SimpleDeNovo_contig_105745	gi|224381666|ref|NC_011462.1_TGU1|	74.56	114	26	2	133	244	42401900	42401788	3e-10	69.8	38	M
NorthernBobwhite_SimpleDeNovo_contig_105781	gi|224381666|ref|NC_011462.1_TGU1|	73.38	710	132	13	2535	3229	10012271	10011604	8e-115	421	621	M
NorthernBobwhite_SimpleDeNovo_contig_105011	gi|224381666|ref|NC_011462.1_TGU1|	87.17	226	24	1	599	819	70003669	70003894	7e-72	277	33	M
NorthernBobwhite_SimpleDeNovo_contig_10502	gi|224381666|ref|NC_011462.1_TGU1|	69.29	1827	398	48	3476	5209	17470339	17468583	0	697	30775	M
NorthernBobwhite_SimpleDeNovo_contig_105106	gi|224381666|ref|NC_011462.1_TGU1|	70.48	2703	577	68	1419	3957	94366496	94369141	0	1169	110	M
NorthernBobwhite_SimpleDeNovo_contig_105148	gi|224381666|ref|NC_011462.1_TGU1|	79.06	277	35	9	721	983	70148801	70148534	2e-54	219	4086	M
NorthernBobwhite_SimpleDeNovo_contig_105223	gi|224381666|ref|NC_011462.1_TGU1|	70.16	315	84	6	255	563	85801944	85802254	3e-27	127	97	M
NorthernBobwhite_SimpleDeNovo_contig_105287	gi|224381666|ref|NC_011462.1_TGU1|	71.8	922	184	22	806	1685	33851978	33851091	5e-127	461	351	M
NorthernBobwhite_SimpleDeNovo_contig_105315	gi|224381666|ref|NC_011462.1_TGU1|	77.41	735	102	15	918	1610	55445816	55445104	5e-159	567	226	M
NorthernBobwhite_SimpleDeNovo_contig_105335	gi|224381666|ref|NC_011462.1_TGU1|	75.77	809	159	9	709	1496	28390369	28391161	3e-159	569	118	M
NorthernBobwhite_SimpleDeNovo_contig_105430	gi|224381666|ref|NC_011462.1_TGU1|	72.22	2466	517	47	40	2392	54257591	54260001	0	1299	95	M
NorthernBobwhite_SimpleDeNovo_contig_105454	gi|224381666|ref|NC_011462.1_TGU1|	71.45	2448	475	61	86	2427	90870037	90867708	0	1191	70	M
NorthernBobwhite_SimpleDeNovo_contig_105464	gi|224381666|ref|NC_011462.1_TGU1|	72.18	1790	348	49	269	1966	74970953	74969222	0	897	5858	M
NorthernBobwhite_SimpleDeNovo_contig_105470	gi|224381666|ref|NC_011462.1_TGU1|	83.22	757	111	9	745	1489	15460500	15461252	0	767	124	M
NorthernBobwhite_SimpleDeNovo_contig_1056	gi|224381666|ref|NC_011462.1_TGU1|	71.64	2038	506	38	9432	11421	76850274	76852287	0	964	20361	M
NorthernBobwhite_SimpleDeNovo_contig_105602	gi|224381666|ref|NC_011462.1_TGU1|	73.8	1645	308	38	531	2102	82973992	82972398	0	964	22830	M
NorthernBobwhite_SimpleDeNovo_contig_105731	gi|224381666|ref|NC_011462.1_TGU1|	75.09	554	106	13	2676	3212	66804692	66804154	1e-92	347	4243	M
NorthernBobwhite_SimpleDeNovo_contig_105769	gi|224381666|ref|NC_011462.1_TGU1|	78.98	847	132	15	985	1810	106151615	106152436	0	699	210	M
NorthernBobwhite_SimpleDeNovo_contig_105828	gi|224381666|ref|NC_011462.1_TGU1|	71.98	778	157	23	501	1229	56430317	56429552	1e-100	372	152	M
NorthernBobwhite_SimpleDeNovo_contig_105954	gi|224381666|ref|NC_011462.1_TGU1|	82.05	635	99	10	478	1104	34445754	34445127	6e-169	600	18982	M
NorthernBobwhite_SimpleDeNovo_contig_105957	gi|224381666|ref|NC_011462.1_TGU1|	80.39	51	9	1	49	98	102326026	102325976	0.013	44.6	51	M
NorthernBobwhite_SimpleDeNovo_contig_106078	gi|224381666|ref|NC_011462.1_TGU1|	81.42	183	28	5	74	251	102630218	102630037	1e-36	159	101	M
NorthernBobwhite_SimpleDeNovo_contig_106138	gi|224381666|ref|NC_011462.1_TGU1|	75.7	214	37	7	8	209	11985301	11985091	1e-28	134	2637	M
NorthernBobwhite_SimpleDeNovo_contig_106211	gi|224381666|ref|NC_011462.1_TGU1|	75.58	901	187	10	510	1378	60787634	60788533	2e-174	618	25398	M
NorthernBobwhite_SimpleDeNovo_contig_10624	gi|224381666|ref|NC_011462.1_TGU1|	70.04	524	129	11	203	701	32445191	32445711	3e-53	214	19052	M
NorthernBobwhite_SimpleDeNovo_contig_106311	gi|224381666|ref|NC_011462.1_TGU1|	73.84	3051	557	61	749	3677	89826463	89829394	0	1847	1955	M
NorthernBobwhite_SimpleDeNovo_contig_106331	gi|224381666|ref|NC_011462.1_TGU1|	79.28	111	14	6	2	104	59784080	59784189	3e-12	78.8	2117	M
NorthernBobwhite_SimpleDeNovo_contig_106335	gi|224381666|ref|NC_011462.1_TGU1|	78.53	4210	682	65	4042	8132	34275760	34279866	0	3424	8015	M
NorthernBobwhite_SimpleDeNovo_contig_106343	gi|224381666|ref|NC_011462.1_TGU1|	76.37	567	106	8	954	1499	80883429	80882870	3e-111	408	214	M
NorthernBobwhite_SimpleDeNovo_contig_106372	gi|224381666|ref|NC_011462.1_TGU1|	68.47	463	107	14	692	1137	17043724	17044164	4e-33	149	60	M
NorthernBobwhite_SimpleDeNovo_contig_10641	gi|224381666|ref|NC_011462.1_TGU1|	73	1615	320	34	7306	8860	76202529	76204087	0	899	109	M
NorthernBobwhite_SimpleDeNovo_contig_106513	gi|224381666|ref|NC_011462.1_TGU1|	84.62	52	8	0	195	246	88335066	88335117	7e-07	59	86	M
NorthernBobwhite_SimpleDeNovo_contig_106520	gi|224381666|ref|NC_011462.1_TGU1|	74.09	247	50	3	602	848	46617264	46617496	1e-35	156	16351	M
NorthernBobwhite_SimpleDeNovo_contig_106531	gi|224381666|ref|NC_011462.1_TGU1|	67.54	798	155	27	2	780	15505562	15504850	3e-62	244	480	M
NorthernBobwhite_SimpleDeNovo_contig_106593	gi|224381666|ref|NC_011462.1_TGU1|	69.91	1509	318	47	176	1624	19990858	19992290	1e-164	585	429	M
NorthernBobwhite_SimpleDeNovo_contig_106626	gi|224381666|ref|NC_011462.1_TGU1|	96.77	31	1	0	711	741	44485529	44485559	0.0003	51.8	46	M
NorthernBobwhite_SimpleDeNovo_contig_106629	gi|224381666|ref|NC_011462.1_TGU1|	76.45	310	57	6	2592	2894	59266638	59266938	1e-53	217	15443	M
NorthernBobwhite_SimpleDeNovo_contig_106786	gi|224381666|ref|NC_011462.1_TGU1|	76.07	539	115	8	9653	10180	53719535	53720070	3e-98	367	15097	M
NorthernBobwhite_SimpleDeNovo_contig_105050	gi|224381666|ref|NC_011462.1_TGU1|	66.24	1893	426	66	826	2596	63010007	63011808	1e-116	428	7984	M
NorthernBobwhite_SimpleDeNovo_contig_105083	gi|224381666|ref|NC_011462.1_TGU1|	72.14	2785	571	46	1368	4030	37829265	37831966	0	1501	27795	M
NorthernBobwhite_SimpleDeNovo_contig_105091	gi|224381666|ref|NC_011462.1_TGU1|	65.18	1634	368	52	11	1576	1731069	1732569	2e-87	329	152	M
NorthernBobwhite_SimpleDeNovo_contig_105133	gi|224381666|ref|NC_011462.1_TGU1|	68.66	2138	442	57	4007	6014	79903042	79901003	0	783	4222	M
NorthernBobwhite_SimpleDeNovo_contig_105271	gi|224381666|ref|NC_011462.1_TGU1|	69.06	669	137	12	765	1394	61228418	61229055	5e-73	282	9878	M
NorthernBobwhite_SimpleDeNovo_contig_105286	gi|224381666|ref|NC_011462.1_TGU1|	74.68	470	104	6	33	499	46855698	46855241	9e-79	298	13513	M
NorthernBobwhite_SimpleDeNovo_contig_105329	gi|224381666|ref|NC_011462.1_TGU1|	69.46	989	269	20	1812	2789	51360722	51359756	4e-97	361	15303	M
NorthernBobwhite_SimpleDeNovo_contig_105476	gi|224381666|ref|NC_011462.1_TGU1|	75	92	19	3	12804	12894	104917437	104917525	0.001	53.6	135	M
NorthernBobwhite_SimpleDeNovo_contig_105535	gi|224381666|ref|NC_011462.1_TGU1|	71.59	345	74	9	789	1129	109975169	109974845	3e-37	161	160	M
NorthernBobwhite_SimpleDeNovo_contig_105539	gi|224381666|ref|NC_011462.1_TGU1|	73.68	285	61	4	7	290	32259080	32259351	3e-40	170	81	M
NorthernBobwhite_SimpleDeNovo_contig_105600	gi|224381666|ref|NC_011462.1_TGU1|	79.07	86	17	1	21	106	103656740	103656824	4e-10	71.6	51	M
NorthernBobwhite_SimpleDeNovo_contig_10574	gi|224381666|ref|NC_011462.1_TGU1|	78.79	66	14	0	972	1037	43704797	43704862	8e-06	57.2	57	M
NorthernBobwhite_SimpleDeNovo_contig_105746	gi|224381666|ref|NC_011462.1_TGU1|	68.67	798	192	23	420	1170	42400713	42399927	6e-67	260	76	M
NorthernBobwhite_SimpleDeNovo_contig_105880	gi|224381666|ref|NC_011462.1_TGU1|	68.61	1249	338	27	67	1286	81565455	81566678	3e-112	412	3659	M
NorthernBobwhite_SimpleDeNovo_contig_104467	gi|224381666|ref|NC_011462.1_TGU1|	86.05	43	5	1	960	1001	85800153	85800195	0.004	48.2	140	M
NorthernBobwhite_SimpleDeNovo_contig_104503	gi|224381666|ref|NC_011462.1_TGU1|	70.87	484	117	14	512	987	114336228	114335761	1e-47	196	53	M
NorthernBobwhite_SimpleDeNovo_contig_104507	gi|224381666|ref|NC_011462.1_TGU1|	66.52	1807	410	50	140	1849	117817250	117818958	3e-133	482	156	M
NorthernBobwhite_SimpleDeNovo_contig_104631	gi|224381666|ref|NC_011462.1_TGU1|	70.95	1518	276	47	1593	3016	94393045	94394491	0	686	149	M
NorthernBobwhite_SimpleDeNovo_contig_104694	gi|224381666|ref|NC_011462.1_TGU1|	75.65	2226	415	42	23	2187	81618584	81616425	0	1496	5756	M
NorthernBobwhite_SimpleDeNovo_contig_104728	gi|224381666|ref|NC_011462.1_TGU1|	73.74	3961	771	85	11618	15429	47040488	47036648	0	2315	64439	M
NorthernBobwhite_SimpleDeNovo_contig_104806	gi|224381666|ref|NC_011462.1_TGU1|	70.49	593	135	12	337	910	59145990	59145419	8e-68	262	5114	M
NorthernBobwhite_SimpleDeNovo_contig_104963	gi|224381666|ref|NC_011462.1_TGU1|	78.21	156	29	2	818	968	62953722	62953877	1e-25	123	393	M
NorthernBobwhite_SimpleDeNovo_contig_104976	gi|224381666|ref|NC_011462.1_TGU1|	67.47	1500	316	36	1487	2885	61686913	61685485	4e-138	499	7941	M
NorthernBobwhite_SimpleDeNovo_contig_105058	gi|224381666|ref|NC_011462.1_TGU1|	68.1	1577	368	40	4718	6244	104827749	104829240	5e-144	518	128	M
NorthernBobwhite_SimpleDeNovo_contig_105095	gi|224381666|ref|NC_011462.1_TGU1|	78.5	535	94	5	1869	2402	14909922	14910436	1e-121	443	84	M
NorthernBobwhite_SimpleDeNovo_contig_105153	gi|224381666|ref|NC_011462.1_TGU1|	71.77	209	52	2	603	804	99073734	99073526	1e-21	109	5924	M
NorthernBobwhite_SimpleDeNovo_contig_105187	gi|224381666|ref|NC_011462.1_TGU1|	70.77	1146	279	19	1872	2999	78118161	78117054	3e-145	522	4261	M
NorthernBobwhite_SimpleDeNovo_contig_105191	gi|224381666|ref|NC_011462.1_TGU1|	76.73	1921	293	43	1742	3615	108763609	108765422	0	1395	10211	M
NorthernBobwhite_SimpleDeNovo_contig_105275	gi|224381666|ref|NC_011462.1_TGU1|	71.45	606	94	14	751	1291	33339876	33339285	2e-85	322	353	M
NorthernBobwhite_SimpleDeNovo_contig_105310	gi|224381666|ref|NC_011462.1_TGU1|	74.8	3159	578	54	1864	4934	26920513	26923541	0	2062	5181	M
NorthernBobwhite_SimpleDeNovo_contig_105348	gi|224381666|ref|NC_011462.1_TGU1|	72.72	810	195	12	405	1203	85518444	85519238	9e-119	434	3611	M
NorthernBobwhite_SimpleDeNovo_contig_105550	gi|224381666|ref|NC_011462.1_TGU1|	84.33	1270	126	18	184	1439	50218535	50217325	0	1379	94	M
NorthernBobwhite_SimpleDeNovo_contig_105705	gi|224381666|ref|NC_011462.1_TGU1|	75.55	1452	259	29	601	1986	61316013	61314592	0	975	239	M
NorthernBobwhite_SimpleDeNovo_contig_105864	gi|224381666|ref|NC_011462.1_TGU1|	71.24	744	182	12	620	1347	79414781	79415508	1e-94	352	29735	M
NorthernBobwhite_SimpleDeNovo_contig_105875	gi|224381666|ref|NC_011462.1_TGU1|	76.4	839	168	11	3115	3931	83085353	83086183	4e-168	598	6795	M
NorthernBobwhite_SimpleDeNovo_contig_105934	gi|224381666|ref|NC_011462.1_TGU1|	68.76	701	175	22	83	753	47817276	47816590	3e-54	217	66	M
NorthernBobwhite_SimpleDeNovo_contig_105983	gi|224381666|ref|NC_011462.1_TGU1|	68.71	684	168	10	170	816	48384631	48385305	2e-76	291	27837	M
NorthernBobwhite_SimpleDeNovo_contig_106007	gi|224381666|ref|NC_011462.1_TGU1|	73.03	1368	280	31	2882	4188	5897091	5898430	0	744	36205	M
NorthernBobwhite_SimpleDeNovo_contig_106029	gi|224381666|ref|NC_011462.1_TGU1|	78.97	1412	259	19	57	1444	65558391	65556994	0	1157	706	M
NorthernBobwhite_SimpleDeNovo_contig_106216	gi|224381666|ref|NC_011462.1_TGU1|	68.3	1839	414	50	1434	3179	38456585	38454823	2e-173	616	26283	M
NorthernBobwhite_SimpleDeNovo_contig_106221	gi|224381666|ref|NC_011462.1_TGU1|	75.75	973	170	28	161	1077	7225044	7226006	2e-176	625	9826	M
NorthernBobwhite_SimpleDeNovo_contig_106315	gi|224381666|ref|NC_011462.1_TGU1|	100	22	0	0	159	180	114743847	114743868	0.15	41	59	M
NorthernBobwhite_SimpleDeNovo_contig_106349	gi|224381666|ref|NC_011462.1_TGU1|	68.54	836	176	21	848	1665	66681439	66682205	2e-80	306	987	M
NorthernBobwhite_SimpleDeNovo_contig_106365	gi|224381666|ref|NC_011462.1_TGU1|	71.29	310	74	5	168	470	27270394	27270093	2e-33	149	74	M
NorthernBobwhite_SimpleDeNovo_contig_106396	gi|224381666|ref|NC_011462.1_TGU1|	75.63	238	49	3	1162	1395	74957352	74957584	2e-37	163	259	M
NorthernBobwhite_SimpleDeNovo_contig_106417	gi|224381666|ref|NC_011462.1_TGU1|	66.74	1398	319	45	1990	3318	37464725	37466045	6e-95	354	490	M
NorthernBobwhite_SimpleDeNovo_contig_106498	gi|224381666|ref|NC_011462.1_TGU1|	68	2256	554	54	1761	3919	17461873	17464057	0	722	790	M
NorthernBobwhite_SimpleDeNovo_contig_106657	gi|224381666|ref|NC_011462.1_TGU1|	65.75	2330	524	66	984	3144	66786863	66784639	9e-155	554	16929	M
NorthernBobwhite_SimpleDeNovo_contig_106678	gi|224381666|ref|NC_011462.1_TGU1|	75.1	1550	294	29	1128	2629	71002990	71001485	0	1007	113	M
NorthernBobwhite_SimpleDeNovo_contig_106726	gi|224381666|ref|NC_011462.1_TGU1|	87.04	216	23	2	150	363	113033296	113033084	1e-66	259	1043	M
NorthernBobwhite_SimpleDeNovo_contig_106732	gi|224381666|ref|NC_011462.1_TGU1|	76.92	966	193	15	699	1648	85574438	85575389	0	697	121	M
NorthernBobwhite_SimpleDeNovo_contig_106833	gi|224381666|ref|NC_011462.1_TGU1|	73.04	779	171	14	123	883	79042607	79043364	3e-118	430	114	M
NorthernBobwhite_SimpleDeNovo_contig_10700	gi|224381666|ref|NC_011462.1_TGU1|	85.2	554	49	8	1218	1762	98724654	98724125	5e-176	623	139	M
NorthernBobwhite_SimpleDeNovo_contig_107159	gi|224381666|ref|NC_011462.1_TGU1|	69.3	684	152	15	30	683	7764440	7765095	1e-70	271	67	M
NorthernBobwhite_SimpleDeNovo_contig_107239	gi|224381666|ref|NC_011462.1_TGU1|	74.38	1011	182	24	4383	5346	39219448	39218468	6e-174	618	662	M
NorthernBobwhite_SimpleDeNovo_contig_105505	gi|224381666|ref|NC_011462.1_TGU1|	91.89	37	3	0	467	503	107219942	107219906	4e-05	53.6	85	M
NorthernBobwhite_SimpleDeNovo_contig_105525	gi|224381666|ref|NC_011462.1_TGU1|	75.76	821	135	17	3	817	98113004	98113766	1e-158	565	37	M
NorthernBobwhite_SimpleDeNovo_contig_105538	gi|224381666|ref|NC_011462.1_TGU1|	72.71	425	95	5	16	435	32256031	32255623	2e-61	241	155	M
NorthernBobwhite_SimpleDeNovo_contig_105599	gi|224381666|ref|NC_011462.1_TGU1|	68.98	1080	245	25	2489	3525	42582126	42583158	4e-110	407	33484	M
NorthernBobwhite_SimpleDeNovo_contig_105633	gi|224381666|ref|NC_011462.1_TGU1|	85.52	815	92	8	1	799	84423813	84424617	0	926	140	M
NorthernBobwhite_SimpleDeNovo_contig_106051	gi|224381666|ref|NC_011462.1_TGU1|	69.49	1544	300	44	905	2406	113370217	113368803	4e-174	618	4555	M
NorthernBobwhite_SimpleDeNovo_contig_106134	gi|224381666|ref|NC_011462.1_TGU1|	68.98	1496	325	47	3026	4419	114956300	114954842	1e-144	520	131	M
NorthernBobwhite_SimpleDeNovo_contig_106275	gi|224381666|ref|NC_011462.1_TGU1|	83.92	342	50	3	638	976	105764623	105764284	8e-97	360	119	M
NorthernBobwhite_SimpleDeNovo_contig_106288	gi|224381666|ref|NC_011462.1_TGU1|	71.12	554	134	10	3	547	58093479	58094015	2e-66	257	3130	M
NorthernBobwhite_SimpleDeNovo_contig_106301	gi|224381666|ref|NC_011462.1_TGU1|	76.41	195	36	3	2296	2490	11057422	11057238	2e-30	140	217	M
NorthernBobwhite_SimpleDeNovo_contig_10631	gi|224381666|ref|NC_011462.1_TGU1|	94.12	34	1	1	1838	1871	108646398	108646430	0.003	50	236	M
NorthernBobwhite_SimpleDeNovo_contig_106338	gi|224381666|ref|NC_011462.1_TGU1|	90.14	629	62	0	317	945	16997758	16998386	0	856	17815	M
NorthernBobwhite_SimpleDeNovo_contig_106414	gi|224381666|ref|NC_011462.1_TGU1|	68.03	294	80	5	10249	10538	112506573	112506290	1e-16	96.9	967	M
NorthernBobwhite_SimpleDeNovo_contig_105820	gi|224381666|ref|NC_011462.1_TGU1|	71.49	4536	974	112	1871	6259	19874507	19870144	0	2134	151	M
NorthernBobwhite_SimpleDeNovo_contig_105865	gi|224381666|ref|NC_011462.1_TGU1|	77.07	1016	183	25	1238	2224	79411373	79410379	0	715	117	M
NorthernBobwhite_SimpleDeNovo_contig_105878	gi|224381666|ref|NC_011462.1_TGU1|	67.79	745	143	20	2740	3410	56101061	56100340	4e-66	259	767	M
NorthernBobwhite_SimpleDeNovo_contig_105907	gi|224381666|ref|NC_011462.1_TGU1|	74.53	1288	252	27	759	2010	17785644	17784397	0	791	23823	M
NorthernBobwhite_SimpleDeNovo_contig_106031	gi|224381666|ref|NC_011462.1_TGU1|	68.02	1926	442	50	2055	3905	38290133	38288307	7e-177	628	12961	M
NorthernBobwhite_SimpleDeNovo_contig_106258	gi|224381666|ref|NC_011462.1_TGU1|	80.36	56	8	2	130	185	11251597	11251649	0.007	46.4	39	M
NorthernBobwhite_SimpleDeNovo_contig_106266	gi|224381666|ref|NC_011462.1_TGU1|	77.36	552	94	7	99	649	86445365	86444844	2e-117	428	13938	M
NorthernBobwhite_SimpleDeNovo_contig_106384	gi|224381666|ref|NC_011462.1_TGU1|	78.17	1182	212	17	1	1148	17013030	17011861	0	933	131	M
NorthernBobwhite_SimpleDeNovo_contig_106411	gi|224381666|ref|NC_011462.1_TGU1|	70.21	658	143	18	4169	4787	34582661	34582018	3e-69	269	2251	M
NorthernBobwhite_SimpleDeNovo_contig_106468	gi|224381666|ref|NC_011462.1_TGU1|	70.35	317	79	10	1	308	47883282	47883592	5e-24	116	37	M
NorthernBobwhite_SimpleDeNovo_contig_10649	gi|224381666|ref|NC_011462.1_TGU1|	78.74	729	116	16	15263	15969	42804724	42804013	7e-162	580	15919	M
NorthernBobwhite_SimpleDeNovo_contig_106555	gi|224381666|ref|NC_011462.1_TGU1|	68.48	1916	416	57	51	1834	112573504	112571645	0	645	67	M
NorthernBobwhite_SimpleDeNovo_contig_105939	gi|224381666|ref|NC_011462.1_TGU1|	67.86	946	211	27	1741	2627	105908602	105909513	1e-77	298	11923	M
NorthernBobwhite_SimpleDeNovo_contig_105956	gi|224381666|ref|NC_011462.1_TGU1|	78.15	151	31	2	1085	1233	32454901	32455051	1e-23	116	4926	M
NorthernBobwhite_SimpleDeNovo_contig_105964	gi|224381666|ref|NC_011462.1_TGU1|	70.06	491	103	11	851	1322	81281536	81282001	7e-53	214	12220	M
NorthernBobwhite_SimpleDeNovo_contig_105991	gi|224381666|ref|NC_011462.1_TGU1|	69.99	1093	260	26	2260	3319	114231412	114232469	1e-119	437	151	M
NorthernBobwhite_SimpleDeNovo_contig_10605	gi|224381666|ref|NC_011462.1_TGU1|	65.45	874	185	24	3960	4736	112883523	112884376	8e-52	212	8820	M
NorthernBobwhite_SimpleDeNovo_contig_106065	gi|224381666|ref|NC_011462.1_TGU1|	77.37	137	22	4	1	130	56457958	56457824	1e-18	98.7	1067	M
NorthernBobwhite_SimpleDeNovo_contig_106143	gi|224381666|ref|NC_011462.1_TGU1|	73.73	354	74	6	348	688	78797416	78797069	1e-51	210	192	M
NorthernBobwhite_SimpleDeNovo_contig_106165	gi|224381666|ref|NC_011462.1_TGU1|	72.86	409	82	7	141	538	93108446	93108836	8e-59	232	87	M
NorthernBobwhite_SimpleDeNovo_contig_106192	gi|224381666|ref|NC_011462.1_TGU1|	77.36	1312	268	16	4836	6126	76363989	76362686	0	982	10987	M
NorthernBobwhite_SimpleDeNovo_contig_106219	gi|224381666|ref|NC_011462.1_TGU1|	76.16	344	77	3	25	364	75632512	75632854	4e-62	242	12664	M
NorthernBobwhite_SimpleDeNovo_contig_10622	gi|224381666|ref|NC_011462.1_TGU1|	74.85	1972	384	40	874	2804	98584751	98586651	0	1242	19569	M
NorthernBobwhite_SimpleDeNovo_contig_106276	gi|224381666|ref|NC_011462.1_TGU1|	69.15	577	128	9	24	554	47298016	47297444	5e-61	242	16685	M
NorthernBobwhite_SimpleDeNovo_contig_106332	gi|224381666|ref|NC_011462.1_TGU1|	73.8	1687	328	38	3088	4707	7839948	7838309	0	982	23051	M
NorthernBobwhite_SimpleDeNovo_contig_106362	gi|224381666|ref|NC_011462.1_TGU1|	76.1	159	27	4	9	167	8329545	8329692	4e-20	107	395	M
NorthernBobwhite_SimpleDeNovo_contig_106421	gi|224381666|ref|NC_011462.1_TGU1|	82.06	301	35	3	847	1135	112807380	112807087	1e-79	304	189	M
NorthernBobwhite_SimpleDeNovo_contig_106457	gi|224381666|ref|NC_011462.1_TGU1|	65.34	502	86	13	77	494	6567891	6568388	4e-31	141	495	M
NorthernBobwhite_SimpleDeNovo_contig_106537	gi|224381666|ref|NC_011462.1_TGU1|	71.85	373	77	6	6	352	32445341	32445711	1e-48	197	4320	M
NorthernBobwhite_SimpleDeNovo_contig_106585	gi|224381666|ref|NC_011462.1_TGU1|	87.12	326	29	5	1	321	32183020	32182703	3e-106	389	80	M
NorthernBobwhite_SimpleDeNovo_contig_106594	gi|224381666|ref|NC_011462.1_TGU1|	77.98	1894	325	32	3000	4853	19986594	19984753	0	1474	153	M
NorthernBobwhite_SimpleDeNovo_contig_106747	gi|224381666|ref|NC_011462.1_TGU1|	68.31	1868	402	44	814	2559	87880583	87878784	0	673	8716	M
NorthernBobwhite_SimpleDeNovo_contig_106782	gi|224381666|ref|NC_011462.1_TGU1|	76.42	776	161	15	13	779	65766633	65765871	3e-147	527	17227	M
NorthernBobwhite_SimpleDeNovo_contig_106804	gi|224381666|ref|NC_011462.1_TGU1|	74.3	716	155	11	59	754	44573300	44572594	1e-120	439	17304	M
NorthernBobwhite_SimpleDeNovo_contig_10615	gi|224381666|ref|NC_011462.1_TGU1|	70.33	883	200	20	2053	2909	101145728	101144882	5e-102	378	182	M
NorthernBobwhite_SimpleDeNovo_contig_106434	gi|224381666|ref|NC_011462.1_TGU1|	75.5	151	30	5	1853	1996	99662559	99662409	3e-15	89.7	14249	M
NorthernBobwhite_SimpleDeNovo_contig_106470	gi|224381666|ref|NC_011462.1_TGU1|	67.57	185	31	8	321	500	72177083	72177243	0.0001	53.6	255	M
NorthernBobwhite_SimpleDeNovo_contig_106557	gi|224381666|ref|NC_011462.1_TGU1|	90.91	33	3	0	527	559	40070030	40070062	0.016	46.4	274	M
NorthernBobwhite_SimpleDeNovo_contig_106576	gi|224381666|ref|NC_011462.1_TGU1|	84.88	172	26	0	12	183	77320909	77320738	1e-47	194	80	M
NorthernBobwhite_SimpleDeNovo_contig_106581	gi|224381666|ref|NC_011462.1_TGU1|	78.2	2514	453	23	1	2478	83285747	83288201	0	2046	170	M
NorthernBobwhite_SimpleDeNovo_contig_106689	gi|224381666|ref|NC_011462.1_TGU1|	78.17	1402	241	18	8916	10274	65118209	65116830	0	1126	7987	M
NorthernBobwhite_SimpleDeNovo_contig_106749	gi|224381666|ref|NC_011462.1_TGU1|	69.86	803	211	17	6354	7139	27009176	27009964	8e-85	324	38768	M
NorthernBobwhite_SimpleDeNovo_contig_106766	gi|224381666|ref|NC_011462.1_TGU1|	72.22	3009	582	69	18513	21425	117135363	117132513	0	1575	418	M
NorthernBobwhite_SimpleDeNovo_contig_106816	gi|224381666|ref|NC_011462.1_TGU1|	84.78	46	7	0	16	61	25397608	25397653	0.0002	51.8	73	M
NorthernBobwhite_SimpleDeNovo_contig_106857	gi|224381666|ref|NC_011462.1_TGU1|	78.96	827	156	11	834	1653	19688798	19687983	0	673	20927	M
NorthernBobwhite_SimpleDeNovo_contig_106909	gi|224381666|ref|NC_011462.1_TGU1|	66.48	1232	256	37	252	1379	31478020	31479198	5e-89	334	85	M
NorthernBobwhite_SimpleDeNovo_contig_107131	gi|224381666|ref|NC_011462.1_TGU1|	72.43	2093	407	45	1	2015	65539968	65537968	0	1124	92	M
NorthernBobwhite_SimpleDeNovo_contig_107152	gi|224381666|ref|NC_011462.1_TGU1|	78.51	1219	177	23	6	1178	95554921	95553742	0	991	2211	M
NorthernBobwhite_SimpleDeNovo_contig_107325	gi|224381666|ref|NC_011462.1_TGU1|	82.98	47	6	1	21	67	5440908	5440952	0.004	46.4	73	M
NorthernBobwhite_SimpleDeNovo_contig_107393	gi|224381666|ref|NC_011462.1_TGU1|	86.3	73	9	1	330	401	76547261	76547333	2e-14	84.2	2762	M
NorthernBobwhite_SimpleDeNovo_contig_107423	gi|224381666|ref|NC_011462.1_TGU1|	73.19	1309	264	19	288	1543	69022593	69023867	0	771	2778	M
NorthernBobwhite_SimpleDeNovo_contig_107430	gi|224381666|ref|NC_011462.1_TGU1|	69.72	611	125	19	1145	1715	90111899	90112489	2e-59	237	12387	M
NorthernBobwhite_SimpleDeNovo_contig_107457	gi|224381666|ref|NC_011462.1_TGU1|	70.21	1316	289	26	2092	3373	56867207	56865961	3e-163	581	7858	M
NorthernBobwhite_SimpleDeNovo_contig_107462	gi|224381666|ref|NC_011462.1_TGU1|	72.56	164	31	6	1277	1427	69498487	69498649	3e-12	78.8	99	M
NorthernBobwhite_SimpleDeNovo_contig_107534	gi|224381666|ref|NC_011462.1_TGU1|	72.19	169	36	4	306	472	45313989	45314148	7e-15	86	1278	M
NorthernBobwhite_SimpleDeNovo_contig_107588	gi|224381666|ref|NC_011462.1_TGU1|	71.84	909	168	23	1465	2342	4870127	4870978	4e-127	461	683	M
NorthernBobwhite_SimpleDeNovo_contig_107622	gi|224381666|ref|NC_011462.1_TGU1|	70.68	1122	237	35	7309	8385	76451693	76452767	4e-128	466	19982	M
NorthernBobwhite_SimpleDeNovo_contig_107626	gi|224381666|ref|NC_011462.1_TGU1|	71.71	562	93	20	8	516	63882024	63882572	4e-69	266	75	M
NorthernBobwhite_SimpleDeNovo_contig_107652	gi|224381666|ref|NC_011462.1_TGU1|	72.71	425	100	7	290	703	65849005	65849424	1e-56	226	3924	M
NorthernBobwhite_SimpleDeNovo_contig_107653	gi|224381666|ref|NC_011462.1_TGU1|	67.8	851	200	20	325	1124	14151214	14150387	9e-72	277	4265	M
NorthernBobwhite_SimpleDeNovo_contig_107738	gi|224381666|ref|NC_011462.1_TGU1|	78.41	454	88	5	1	452	114399860	114399415	6e-98	363	57	M
NorthernBobwhite_SimpleDeNovo_contig_107739	gi|224381666|ref|NC_011462.1_TGU1|	74.88	430	102	4	167	591	114403547	114403975	2e-72	277	42	M
NorthernBobwhite_SimpleDeNovo_contig_107746	gi|224381666|ref|NC_011462.1_TGU1|	67.56	823	197	31	497	1283	106487564	106486776	5e-50	205	136	M
NorthernBobwhite_SimpleDeNovo_contig_107747	gi|224381666|ref|NC_011462.1_TGU1|	83.79	327	49	2	873	1195	106488997	106489323	2e-92	345	116	M
NorthernBobwhite_SimpleDeNovo_contig_107786	gi|224381666|ref|NC_011462.1_TGU1|	78.83	1351	231	24	2711	4019	40872640	40871303	0	1088	7384	M
NorthernBobwhite_SimpleDeNovo_contig_107839	gi|224381666|ref|NC_011462.1_TGU1|	83.33	42	6	1	737	778	24739682	24739722	0.42	41	6	M
NorthernBobwhite_SimpleDeNovo_contig_107980	gi|224381666|ref|NC_011462.1_TGU1|	77.27	176	35	3	13	185	100996061	100996234	2e-27	129	123	M
NorthernBobwhite_SimpleDeNovo_contig_105780	gi|224381666|ref|NC_011462.1_TGU1|	80	255	48	1	1	255	10016458	10016709	3e-57	228	120	M
NorthernBobwhite_SimpleDeNovo_contig_105801	gi|224381666|ref|NC_011462.1_TGU1|	77.47	546	109	6	1	538	81755506	81756045	1e-113	416	61	M
NorthernBobwhite_SimpleDeNovo_contig_105838	gi|224381666|ref|NC_011462.1_TGU1|	69.2	1156	272	29	3158	4268	84524710	84525826	8e-116	425	151	M
NorthernBobwhite_SimpleDeNovo_contig_105862	gi|224381666|ref|NC_011462.1_TGU1|	68.57	1820	388	48	4150	5857	102669574	102667827	0	654	13090	M
NorthernBobwhite_SimpleDeNovo_contig_105887	gi|224381666|ref|NC_011462.1_TGU1|	79.38	965	157	16	999	1951	23015593	23014659	0	809	16190	M
NorthernBobwhite_SimpleDeNovo_contig_105902	gi|224381666|ref|NC_011462.1_TGU1|	69.17	412	91	13	25	427	111274989	111274605	3e-32	145	40	M
NorthernBobwhite_SimpleDeNovo_contig_105955	gi|224381666|ref|NC_011462.1_TGU1|	74.7	822	181	9	3850	4661	60342739	60341935	2e-147	529	7230	M
NorthernBobwhite_SimpleDeNovo_contig_106	gi|224381666|ref|NC_011462.1_TGU1|	75.6	754	159	9	924	1662	35149678	35148935	7e-143	513	64	M
NorthernBobwhite_SimpleDeNovo_contig_106088	gi|224381666|ref|NC_011462.1_TGU1|	77.85	149	32	1	1275	1422	83982202	83982054	1e-23	116	6918	M
NorthernBobwhite_SimpleDeNovo_contig_106152	gi|224381666|ref|NC_011462.1_TGU1|	69	3364	726	91	1004	4238	32080511	32083686	0	1240	115	M
NorthernBobwhite_SimpleDeNovo_contig_106229	gi|224381666|ref|NC_011462.1_TGU1|	71.53	2097	483	51	1267	3312	34996137	34994104	0	964	2498	M
NorthernBobwhite_SimpleDeNovo_contig_106274	gi|224381666|ref|NC_011462.1_TGU1|	77.04	771	139	16	7068	7819	43745280	43744529	1e-154	554	7306	M
NorthernBobwhite_SimpleDeNovo_contig_106399	gi|224381666|ref|NC_011462.1_TGU1|	72.34	488	114	9	672	1154	10329216	10328745	2e-63	250	20999	M
NorthernBobwhite_SimpleDeNovo_contig_106427	gi|224381666|ref|NC_011462.1_TGU1|	73.25	1174	255	27	1806	2952	49601500	49600359	7e-179	634	10529	M
NorthernBobwhite_SimpleDeNovo_contig_106509	gi|224381666|ref|NC_011462.1_TGU1|	72.28	285	53	6	327	587	102727870	102727588	8e-35	154	2421	M
NorthernBobwhite_SimpleDeNovo_contig_106543	gi|224381666|ref|NC_011462.1_TGU1|	70.46	1361	272	32	2358	3683	99319594	99320859	1e-173	616	98	M
NorthernBobwhite_SimpleDeNovo_contig_106630	gi|224381666|ref|NC_011462.1_TGU1|	67.39	368	84	7	347	694	88319608	88319959	6e-26	123	914	M
NorthernBobwhite_SimpleDeNovo_contig_106708	gi|224381666|ref|NC_011462.1_TGU1|	75.18	552	97	15	147	671	111586185	111585647	6e-93	347	159	M
NorthernBobwhite_SimpleDeNovo_contig_105816	gi|224381666|ref|NC_011462.1_TGU1|	68.93	1088	227	32	916	1940	56582688	56583727	6e-107	394	75	M
NorthernBobwhite_SimpleDeNovo_contig_105830	gi|224381666|ref|NC_011462.1_TGU1|	70.99	655	155	14	960	1593	76493379	76492739	9e-77	293	69	M
NorthernBobwhite_SimpleDeNovo_contig_105846	gi|224381666|ref|NC_011462.1_TGU1|	69.85	587	152	16	7	579	41847940	41848515	1e-52	212	69	M
NorthernBobwhite_SimpleDeNovo_contig_105885	gi|224381666|ref|NC_011462.1_TGU1|	72.3	704	127	17	2269	2962	34933599	34932954	2e-101	376	513	M
NorthernBobwhite_SimpleDeNovo_contig_105912	gi|224381666|ref|NC_011462.1_TGU1|	81.17	154	22	4	482	629	108127811	108127659	6e-30	136	15571	M
NorthernBobwhite_SimpleDeNovo_contig_105938	gi|224381666|ref|NC_011462.1_TGU1|	78.43	102	19	2	139	239	59792125	59792026	7e-13	78.8	301	M
NorthernBobwhite_SimpleDeNovo_contig_105960	gi|224381666|ref|NC_011462.1_TGU1|	94.29	35	2	0	810	844	81688265	81688299	2e-05	55.4	1005	M
NorthernBobwhite_SimpleDeNovo_contig_105986	gi|224381666|ref|NC_011462.1_TGU1|	69.46	3150	736	63	2313	5317	80016510	80013442	0	1263	550	M
NorthernBobwhite_SimpleDeNovo_contig_106014	gi|224381666|ref|NC_011462.1_TGU1|	73.24	1020	218	19	5630	6628	106977559	106978544	3e-160	572	1289	M
NorthernBobwhite_SimpleDeNovo_contig_10603	gi|224381666|ref|NC_011462.1_TGU1|	68.39	601	116	11	4837	5399	64673793	64674357	1e-61	244	10745	M
NorthernBobwhite_SimpleDeNovo_contig_106068	gi|224381666|ref|NC_011462.1_TGU1|	72.73	110	24	2	673	782	111413806	111413703	5e-07	60.8	398	M
NorthernBobwhite_SimpleDeNovo_contig_106085	gi|224381666|ref|NC_011462.1_TGU1|	73.58	106	20	4	281	383	96635159	96635259	2e-05	55.4	71	M
NorthernBobwhite_SimpleDeNovo_contig_106126	gi|224381666|ref|NC_011462.1_TGU1|	87.18	39	2	2	480	515	67838396	67838434	0.088	42.8	18	M
NorthernBobwhite_SimpleDeNovo_contig_106178	gi|224381666|ref|NC_011462.1_TGU1|	69.8	586	151	13	148	724	14155760	14156328	2e-56	224	59	M
NorthernBobwhite_SimpleDeNovo_contig_106191	gi|224381666|ref|NC_011462.1_TGU1|	65.38	1089	232	31	321	1307	90408340	90409385	5e-65	255	151	M
NorthernBobwhite_SimpleDeNovo_contig_106303	gi|224381666|ref|NC_011462.1_TGU1|	82.69	52	9	0	193	244	88335066	88335117	3e-05	53.6	82	M
NorthernBobwhite_SimpleDeNovo_contig_106316	gi|224381666|ref|NC_011462.1_TGU1|	72.67	1427	303	29	640	2043	33789961	33791323	0	764	50	M
NorthernBobwhite_SimpleDeNovo_contig_106364	gi|224381666|ref|NC_011462.1_TGU1|	73.75	1356	264	36	3002	4312	58078851	58080159	0	762	942	M
NorthernBobwhite_SimpleDeNovo_contig_106502	gi|224381666|ref|NC_011462.1_TGU1|	67.71	542	131	13	633	1142	6388611	6389140	5e-40	170	832	M
NorthernBobwhite_SimpleDeNovo_contig_106503	gi|224381666|ref|NC_011462.1_TGU1|	75.74	305	64	6	1108	1404	6387067	6386765	1e-48	199	1947	M
NorthernBobwhite_SimpleDeNovo_contig_106507	gi|224381666|ref|NC_011462.1_TGU1|	79.4	1427	250	15	372	1792	100383852	100382464	0	1220	2599	M
NorthernBobwhite_SimpleDeNovo_contig_106521	gi|224381666|ref|NC_011462.1_TGU1|	70.29	313	80	4	1400	1711	78851720	78851420	1e-30	140	2405	M
NorthernBobwhite_SimpleDeNovo_contig_106526	gi|224381666|ref|NC_011462.1_TGU1|	64.66	249	41	6	90	319	54918711	54918491	1e-09	68	115	M
NorthernBobwhite_SimpleDeNovo_contig_106549	gi|224381666|ref|NC_011462.1_TGU1|	67.58	583	145	21	153	714	96874988	96874429	2e-32	145	85	M
NorthernBobwhite_SimpleDeNovo_contig_106677	gi|224381666|ref|NC_011462.1_TGU1|	86.96	230	30	0	694	923	79966025	79966254	5e-73	280	9458	M
NorthernBobwhite_SimpleDeNovo_contig_106718	gi|224381666|ref|NC_011462.1_TGU1|	69.55	243	55	5	35	259	20790138	20789897	3e-19	100	64	M
NorthernBobwhite_SimpleDeNovo_contig_106746	gi|224381666|ref|NC_011462.1_TGU1|	87.04	54	7	0	5159	5212	72492086	72492033	8e-08	66.2	166	M
NorthernBobwhite_SimpleDeNovo_contig_106634	gi|224381666|ref|NC_011462.1_TGU1|	82.83	530	72	6	7219	7732	84915830	84916356	3e-149	536	21994	M
NorthernBobwhite_SimpleDeNovo_contig_106676	gi|224381666|ref|NC_011462.1_TGU1|	68.23	1240	311	34	2425	3634	79961725	79960539	5e-103	381	128	M
NorthernBobwhite_SimpleDeNovo_contig_106693	gi|224381666|ref|NC_011462.1_TGU1|	75.74	639	128	3	460	1097	5917285	5917897	3e-128	464	66	M
NorthernBobwhite_SimpleDeNovo_contig_106774	gi|224381666|ref|NC_011462.1_TGU1|	67.5	680	187	10	235	901	73404847	73405505	1e-52	215	7037	M
NorthernBobwhite_SimpleDeNovo_contig_106818	gi|224381666|ref|NC_011462.1_TGU1|	71.86	199	48	6	362	554	2391825	2392021	8e-15	87.8	166	M
NorthernBobwhite_SimpleDeNovo_contig_106838	gi|224381666|ref|NC_011462.1_TGU1|	75	108	27	0	3366	3473	99311573	99311466	3e-10	73.4	136	M
NorthernBobwhite_SimpleDeNovo_contig_106873	gi|224381666|ref|NC_011462.1_TGU1|	71.12	374	86	10	197	556	23647647	23648012	4e-38	163	48	M
NorthernBobwhite_SimpleDeNovo_contig_106876	gi|224381666|ref|NC_011462.1_TGU1|	69.59	194	46	1	16	209	96893398	96893578	2e-16	91.5	37	M
NorthernBobwhite_SimpleDeNovo_contig_106919	gi|224381666|ref|NC_011462.1_TGU1|	73.53	238	50	4	35	260	54917954	54918190	3e-31	140	64	M
NorthernBobwhite_SimpleDeNovo_contig_106948	gi|224381666|ref|NC_011462.1_TGU1|	70.93	1180	221	26	1822	2944	116068746	116069860	4e-161	574	94	M
NorthernBobwhite_SimpleDeNovo_contig_107006	gi|224381666|ref|NC_011462.1_TGU1|	71.66	2900	658	50	4539	7349	96247132	96244308	0	1447	275	M
NorthernBobwhite_SimpleDeNovo_contig_107146	gi|224381666|ref|NC_011462.1_TGU1|	74.45	1675	314	38	6	1637	65413594	65411991	0	1023	63	M
NorthernBobwhite_SimpleDeNovo_contig_107178	gi|224381666|ref|NC_011462.1_TGU1|	75.6	291	63	7	1304	1592	9612090	9612374	1e-42	181	11909	M
NorthernBobwhite_SimpleDeNovo_contig_10723	gi|224381666|ref|NC_011462.1_TGU1|	68.03	391	100	10	1968	2354	99177627	99177258	2e-24	120	11247	M
NorthernBobwhite_SimpleDeNovo_contig_107262	gi|224381666|ref|NC_011462.1_TGU1|	66.42	1203	269	33	4407	5534	34577619	34578761	6e-85	322	1843	M
NorthernBobwhite_SimpleDeNovo_contig_107355	gi|224381666|ref|NC_011462.1_TGU1|	71.82	433	106	6	157	577	101349568	101349996	6e-55	219	65	M
NorthernBobwhite_SimpleDeNovo_contig_107458	gi|224381666|ref|NC_011462.1_TGU1|	70.64	848	192	13	1427	2242	56864005	56864827	1e-108	399	7530	M
NorthernBobwhite_SimpleDeNovo_contig_107504	gi|224381666|ref|NC_011462.1_TGU1|	70.34	435	99	11	1	424	25266212	25265797	1e-43	181	31	M
NorthernBobwhite_SimpleDeNovo_contig_107560	gi|224381666|ref|NC_011462.1_TGU1|	66.21	2785	624	79	478	3118	9291814	9294425	0	710	109	M
NorthernBobwhite_SimpleDeNovo_contig_107571	gi|224381666|ref|NC_011462.1_TGU1|	78.99	376	72	3	3071	3439	102644336	102643961	1e-82	315	3885	M
NorthernBobwhite_SimpleDeNovo_contig_107602	gi|224381666|ref|NC_011462.1_TGU1|	95.65	46	2	0	272	317	85185721	85185766	4e-11	75.2	873	M
NorthernBobwhite_SimpleDeNovo_contig_10761	gi|224381666|ref|NC_011462.1_TGU1|	84.72	3403	386	34	1802	5131	56040045	56043386	0	3761	117	M
NorthernBobwhite_SimpleDeNovo_contig_107620	gi|224381666|ref|NC_011462.1_TGU1|	70.67	566	132	13	1243	1784	30433355	30432800	5e-62	244	3475	M
NorthernBobwhite_SimpleDeNovo_contig_107650	gi|224381666|ref|NC_011462.1_TGU1|	69.57	506	111	13	853	1343	79854218	79853741	2e-48	199	1189	M
NorthernBobwhite_SimpleDeNovo_contig_107765	gi|224381666|ref|NC_011462.1_TGU1|	84.62	39	6	0	33	71	32632615	32632653	0.015	44.6	108	M
NorthernBobwhite_SimpleDeNovo_contig_107766	gi|224381666|ref|NC_011462.1_TGU1|	84.62	39	6	0	287	325	32632653	32632615	0.015	44.6	69	M
NorthernBobwhite_SimpleDeNovo_contig_107809	gi|224381666|ref|NC_011462.1_TGU1|	73.35	3400	619	78	1491	4773	103842111	103838882	0	1954	97	M
NorthernBobwhite_SimpleDeNovo_contig_10785	gi|224381666|ref|NC_011462.1_TGU1|	69.83	358	105	3	2754	3110	99487193	99486838	8e-33	149	489	M
NorthernBobwhite_SimpleDeNovo_contig_107892	gi|224381666|ref|NC_011462.1_TGU1|	87.59	983	113	3	6869	7842	46053273	46054255	0	1218	1162	M
NorthernBobwhite_SimpleDeNovo_contig_10806	gi|224381666|ref|NC_011462.1_TGU1|	77.94	68	15	0	207	274	4851824	4851757	3e-05	55.4	82	M
NorthernBobwhite_SimpleDeNovo_contig_108184	gi|224381666|ref|NC_011462.1_TGU1|	84.14	454	47	8	283	731	483042	483475	1e-132	480	5312	M
NorthernBobwhite_SimpleDeNovo_contig_108194	gi|224381666|ref|NC_011462.1_TGU1|	72.64	976	200	13	1915	2833	51745540	51746505	4e-156	558	1038	M
NorthernBobwhite_SimpleDeNovo_contig_108240	gi|224381666|ref|NC_011462.1_TGU1|	80.61	98	15	2	896	989	26835553	26835456	2e-14	86	2486	M
NorthernBobwhite_SimpleDeNovo_contig_108446	gi|224381666|ref|NC_011462.1_TGU1|	70.74	868	194	15	6620	7461	72107570	72108403	3e-110	407	290	M
NorthernBobwhite_SimpleDeNovo_contig_108504	gi|224381666|ref|NC_011462.1_TGU1|	69.88	2035	412	61	2734	4694	46074725	46076632	0	812	87	M
NorthernBobwhite_SimpleDeNovo_contig_108605	gi|224381666|ref|NC_011462.1_TGU1|	69.59	2729	618	58	32	2615	69890636	69893297	0	1110	638	M
NorthernBobwhite_SimpleDeNovo_contig_108734	gi|224381666|ref|NC_011462.1_TGU1|	74.69	324	66	7	1131	1447	48537318	48537632	5e-48	197	54	M
NorthernBobwhite_SimpleDeNovo_contig_108742	gi|224381666|ref|NC_011462.1_TGU1|	67.77	422	116	8	140	555	101270977	101271384	9e-28	131	259	M
NorthernBobwhite_SimpleDeNovo_contig_108887	gi|224381666|ref|NC_011462.1_TGU1|	76.61	1556	231	37	1758	3253	12638359	12636877	0	1119	18115	M
NorthernBobwhite_SimpleDeNovo_contig_108910	gi|224381666|ref|NC_011462.1_TGU1|	70.8	1007	221	24	5477	6450	95226287	95227253	8e-123	448	14288	M
NorthernBobwhite_SimpleDeNovo_contig_109056	gi|224381666|ref|NC_011462.1_TGU1|	82.54	63	9	1	478	540	67850043	67850103	1e-06	62.6	150	M
NorthernBobwhite_SimpleDeNovo_contig_109140	gi|224381666|ref|NC_011462.1_TGU1|	80.77	104	18	1	4	105	110211905	110211802	1e-17	95.1	2779	M
NorthernBobwhite_SimpleDeNovo_contig_109291	gi|224381666|ref|NC_011462.1_TGU1|	66.71	1478	387	33	1234	2647	17475495	17476931	6e-107	394	101	M
NorthernBobwhite_SimpleDeNovo_contig_109438	gi|224381666|ref|NC_011462.1_TGU1|	80	70	12	1	1872	1941	34135719	34135786	4e-06	60.8	75	M
NorthernBobwhite_SimpleDeNovo_contig_109449	gi|224381666|ref|NC_011462.1_TGU1|	67.75	1662	371	48	1229	2805	7474245	7472664	2e-142	513	7994	M
NorthernBobwhite_SimpleDeNovo_contig_10954	gi|224381666|ref|NC_011462.1_TGU1|	75.78	1887	355	34	3	1816	47051715	47053572	0	1281	10207	M
NorthernBobwhite_SimpleDeNovo_contig_109541	gi|224381666|ref|NC_011462.1_TGU1|	74.43	1881	319	32	2092	3842	40156133	40154285	0	1225	15304	M
NorthernBobwhite_SimpleDeNovo_contig_109571	gi|224381666|ref|NC_011462.1_TGU1|	69.58	1295	265	30	67	1327	70287615	70286416	4e-151	540	51	M
NorthernBobwhite_SimpleDeNovo_contig_109621	gi|224381666|ref|NC_011462.1_TGU1|	67.63	1517	370	47	252	1685	8833395	8831917	2e-114	419	1235	M
NorthernBobwhite_SimpleDeNovo_contig_109640	gi|224381666|ref|NC_011462.1_TGU1|	77.07	410	70	9	763	1158	59548451	59548850	5e-78	297	5642	M
NorthernBobwhite_SimpleDeNovo_contig_10971	gi|224381666|ref|NC_011462.1_TGU1|	66.31	1413	356	31	112	1436	49769729	49768349	5e-100	370	25336	M
NorthernBobwhite_SimpleDeNovo_contig_109788	gi|224381666|ref|NC_011462.1_TGU1|	84.31	51	6	1	433	483	30036047	30035999	6e-05	53.6	50	M
NorthernBobwhite_SimpleDeNovo_contig_1098	gi|224381666|ref|NC_011462.1_TGU1|	71.01	776	164	19	9511	10247	46275665	46276418	6e-94	354	53830	M
NorthernBobwhite_SimpleDeNovo_contig_109878	gi|224381666|ref|NC_011462.1_TGU1|	71.4	507	114	13	14	503	85375257	85374765	9e-58	230	3666	M
NorthernBobwhite_SimpleDeNovo_contig_10988	gi|224381666|ref|NC_011462.1_TGU1|	67.13	1372	348	29	1	1334	3960498	3959192	1e-109	403	2041	M
NorthernBobwhite_SimpleDeNovo_contig_109933	gi|224381666|ref|NC_011462.1_TGU1|	69.34	711	163	19	2027	2703	111984884	111984195	1e-67	264	191	M
NorthernBobwhite_SimpleDeNovo_contig_110012	gi|224381666|ref|NC_011462.1_TGU1|	82.8	1099	169	4	1023	2101	69972519	69973617	0	1130	1441	M
NorthernBobwhite_SimpleDeNovo_contig_110050	gi|224381666|ref|NC_011462.1_TGU1|	75.2	2371	417	42	2320	4598	22009820	22007529	0	1590	446	M
NorthernBobwhite_SimpleDeNovo_contig_110105	gi|224381666|ref|NC_011462.1_TGU1|	75.8	2145	367	30	6912	8938	57468723	57470833	0	1530	3054	M
NorthernBobwhite_SimpleDeNovo_contig_110201	gi|224381666|ref|NC_011462.1_TGU1|	77.03	74	13	3	90	162	605871	605801	0.001	48.2	30	M
NorthernBobwhite_SimpleDeNovo_contig_110203	gi|224381666|ref|NC_011462.1_TGU1|	73.96	96	21	2	629	724	72495715	72495624	2e-05	55.4	109	M
NorthernBobwhite_SimpleDeNovo_contig_110520	gi|224381666|ref|NC_011462.1_TGU1|	76.09	594	108	10	991	1575	42359503	42358935	3e-114	417	33535	M
NorthernBobwhite_SimpleDeNovo_contig_110559	gi|224381666|ref|NC_011462.1_TGU1|	74.05	655	134	14	3087	3727	3106331	3106963	5e-104	385	5075	M
NorthernBobwhite_SimpleDeNovo_contig_110589	gi|224381666|ref|NC_011462.1_TGU1|	67.04	1517	393	39	1	1462	29847495	29846031	1e-109	403	295	M
NorthernBobwhite_SimpleDeNovo_contig_110652	gi|224381666|ref|NC_011462.1_TGU1|	69.11	586	131	20	118	670	36198639	36199207	8e-48	196	167	M
NorthernBobwhite_SimpleDeNovo_contig_110706	gi|224381666|ref|NC_011462.1_TGU1|	72.61	303	67	8	290	584	80269822	80270116	3e-34	150	2923	M
NorthernBobwhite_SimpleDeNovo_contig_110769	gi|224381666|ref|NC_011462.1_TGU1|	73.76	1307	260	31	8	1270	9579067	9580334	0	746	4647	M
NorthernBobwhite_SimpleDeNovo_contig_110844	gi|224381666|ref|NC_011462.1_TGU1|	71.11	1194	254	25	1	1153	34127855	34126712	3e-159	567	312	M
NorthernBobwhite_SimpleDeNovo_contig_110896	gi|224381666|ref|NC_011462.1_TGU1|	78.9	109	22	1	820	928	93653896	93654003	1e-15	89.7	69	M
NorthernBobwhite_SimpleDeNovo_contig_110897	gi|224381666|ref|NC_011462.1_TGU1|	69.88	654	154	17	560	1186	74914969	74914332	1e-64	253	123	M
NorthernBobwhite_SimpleDeNovo_contig_110953	gi|224381666|ref|NC_011462.1_TGU1|	73.3	6610	1209	151	2752	9064	40195371	40189021	0	3784	115	M
NorthernBobwhite_SimpleDeNovo_contig_110971	gi|224381666|ref|NC_011462.1_TGU1|	80	180	35	1	370	549	85889348	85889170	4e-37	159	62	M
NorthernBobwhite_SimpleDeNovo_contig_111021	gi|224381666|ref|NC_011462.1_TGU1|	76.02	517	98	8	2141	2642	1723371	1722866	3e-97	361	77	M
NorthernBobwhite_SimpleDeNovo_contig_111043	gi|224381666|ref|NC_011462.1_TGU1|	71	1693	342	32	4675	6333	105494427	105492850	0	830	142	M
NorthernBobwhite_SimpleDeNovo_contig_111052	gi|224381666|ref|NC_011462.1_TGU1|	75.42	2824	493	54	1893	4602	102427297	102430033	0	1902	223	M
NorthernBobwhite_SimpleDeNovo_contig_111055	gi|224381666|ref|NC_011462.1_TGU1|	80.28	943	146	15	1163	2082	62299121	62298196	0	830	7277	M
NorthernBobwhite_SimpleDeNovo_contig_111058	gi|224381666|ref|NC_011462.1_TGU1|	72.29	231	48	4	143	360	88104444	88104671	3e-26	125	113	M
NorthernBobwhite_SimpleDeNovo_contig_111070	gi|224381666|ref|NC_011462.1_TGU1|	75.31	405	84	6	1921	2311	72721262	72721664	2e-68	268	152	M
NorthernBobwhite_SimpleDeNovo_contig_111352	gi|224381666|ref|NC_011462.1_TGU1|	67.8	4258	980	115	853	4938	83714056	83718094	0	1332	11685	M
NorthernBobwhite_SimpleDeNovo_contig_111362	gi|224381666|ref|NC_011462.1_TGU1|	71.43	686	160	12	92	764	37043414	37044076	1e-88	333	199	M
NorthernBobwhite_SimpleDeNovo_contig_111369	gi|224381666|ref|NC_011462.1_TGU1|	73.48	264	59	8	107	364	14108627	14108885	2e-29	134	5948	M
NorthernBobwhite_SimpleDeNovo_contig_1114	gi|224381666|ref|NC_011462.1_TGU1|	67.07	2894	645	70	2161	4863	38727095	38729871	0	884	4733	M
NorthernBobwhite_SimpleDeNovo_contig_111401	gi|224381666|ref|NC_011462.1_TGU1|	84.66	1317	150	10	2294	3599	25132019	25130744	0	1467	168	M
NorthernBobwhite_SimpleDeNovo_contig_111403	gi|224381666|ref|NC_011462.1_TGU1|	90.59	202	19	0	565	766	98866929	98867130	2e-72	279	10473	M
NorthernBobwhite_SimpleDeNovo_contig_111414	gi|224381666|ref|NC_011462.1_TGU1|	67.29	431	103	13	1022	1443	115264386	115264787	5e-24	118	59	M
NorthernBobwhite_SimpleDeNovo_contig_111602	gi|224381666|ref|NC_011462.1_TGU1|	74.17	720	160	10	1308	2014	104364392	104365098	2e-120	439	279	M
NorthernBobwhite_SimpleDeNovo_contig_111626	gi|224381666|ref|NC_011462.1_TGU1|	70.72	683	146	13	1037	1691	51845158	51844502	9e-85	320	83	M
NorthernBobwhite_SimpleDeNovo_contig_111691	gi|224381666|ref|NC_011462.1_TGU1|	75.49	102	24	1	268	369	33750752	33750852	1e-09	68	57	M
NorthernBobwhite_SimpleDeNovo_contig_111715	gi|224381666|ref|NC_011462.1_TGU1|	68.18	1477	287	45	378	1795	6078970	6080322	3e-141	508	15529	M
NorthernBobwhite_SimpleDeNovo_contig_111735	gi|224381666|ref|NC_011462.1_TGU1|	88.89	36	3	1	395	430	38085522	38085556	0.023	44.6	39	M
NorthernBobwhite_SimpleDeNovo_contig_111812	gi|224381666|ref|NC_011462.1_TGU1|	75.74	3846	653	79	3500	7175	25108404	25112139	0	2626	238	M
NorthernBobwhite_SimpleDeNovo_contig_112039	gi|224381666|ref|NC_011462.1_TGU1|	67.91	536	133	15	78	591	9916927	9917445	5e-37	159	62	M
NorthernBobwhite_SimpleDeNovo_contig_11207	gi|224381666|ref|NC_011462.1_TGU1|	72.87	1795	355	44	1570	3286	79334835	79333095	0	962	1838	M
NorthernBobwhite_SimpleDeNovo_contig_112145	gi|224381666|ref|NC_011462.1_TGU1|	69.57	608	147	13	564	1145	83722220	83722815	2e-60	239	92	M
NorthernBobwhite_SimpleDeNovo_contig_106756	gi|224381666|ref|NC_011462.1_TGU1|	78.83	137	22	4	384	515	83351169	83351035	4e-20	105	8747	M
NorthernBobwhite_SimpleDeNovo_contig_10691	gi|224381666|ref|NC_011462.1_TGU1|	67.62	420	101	23	195	604	57148588	57148982	2e-09	73.4	855	M
NorthernBobwhite_SimpleDeNovo_contig_106912	gi|224381666|ref|NC_011462.1_TGU1|	79.82	1472	251	15	846	2308	56591052	56589618	0	1290	147	M
NorthernBobwhite_SimpleDeNovo_contig_106968	gi|224381666|ref|NC_011462.1_TGU1|	80.42	858	137	13	1216	2056	104055744	104056587	0	760	3153	M
NorthernBobwhite_SimpleDeNovo_contig_106999	gi|224381666|ref|NC_011462.1_TGU1|	72.16	370	97	4	2	369	70988422	70988787	2e-46	190	7943	M
NorthernBobwhite_SimpleDeNovo_contig_107143	gi|224381666|ref|NC_011462.1_TGU1|	77.17	346	68	5	1775	2113	75402995	75403336	1e-64	255	400	M
NorthernBobwhite_SimpleDeNovo_contig_107158	gi|224381666|ref|NC_011462.1_TGU1|	71.11	682	150	8	1183	1836	7763831	7763169	2e-93	349	2866	M
NorthernBobwhite_SimpleDeNovo_contig_107177	gi|224381666|ref|NC_011462.1_TGU1|	72.08	1114	247	27	1208	2281	9607683	9606594	6e-152	544	142	M
NorthernBobwhite_SimpleDeNovo_contig_107292	gi|224381666|ref|NC_011462.1_TGU1|	78.13	1637	275	25	1111	2684	93113754	93112138	0	1301	62	M
NorthernBobwhite_SimpleDeNovo_contig_107354	gi|224381666|ref|NC_011462.1_TGU1|	76.27	472	94	11	11	475	101348687	101348227	7e-83	313	172	M
NorthernBobwhite_SimpleDeNovo_contig_107362	gi|224381666|ref|NC_011462.1_TGU1|	71.46	918	198	20	3236	4130	40211905	40211029	3e-121	443	301	M
NorthernBobwhite_SimpleDeNovo_contig_107510	gi|224381666|ref|NC_011462.1_TGU1|	71.34	977	210	27	749	1707	97032791	97033715	6e-121	441	187	M
NorthernBobwhite_SimpleDeNovo_contig_107589	gi|224381666|ref|NC_011462.1_TGU1|	68.16	694	173	16	1914	2573	74541456	74540777	2e-56	226	3599	M
NorthernBobwhite_SimpleDeNovo_contig_107617	gi|224381666|ref|NC_011462.1_TGU1|	75.8	880	161	14	4057	4904	5237108	5236249	8e-172	610	3251	M
NorthernBobwhite_SimpleDeNovo_contig_107680	gi|224381666|ref|NC_011462.1_TGU1|	72.72	1609	309	33	467	2005	86019636	86018088	0	892	3086	M
NorthernBobwhite_SimpleDeNovo_contig_107868	gi|224381666|ref|NC_011462.1_TGU1|	77.42	1032	180	18	46	1046	57401068	57402077	0	778	193	M
NorthernBobwhite_SimpleDeNovo_contig_107882	gi|224381666|ref|NC_011462.1_TGU1|	74.52	2170	408	36	5523	7589	37708078	37705951	0	1389	34834	M
NorthernBobwhite_SimpleDeNovo_contig_107912	gi|224381666|ref|NC_011462.1_TGU1|	69.76	2454	536	56	5369	7717	50557199	50559551	0	1014	847	M
NorthernBobwhite_SimpleDeNovo_contig_107957	gi|224381666|ref|NC_011462.1_TGU1|	72.25	3604	718	70	3	3435	65501527	65498035	0	1930	863	M
NorthernBobwhite_SimpleDeNovo_contig_108093	gi|224381666|ref|NC_011462.1_TGU1|	68.62	3540	788	96	2695	6084	20067912	20064546	0	1234	75	M
NorthernBobwhite_SimpleDeNovo_contig_1081	gi|224381666|ref|NC_011462.1_TGU1|	71.26	1837	406	40	3016	4776	54493622	54491832	0	863	4741	M
NorthernBobwhite_SimpleDeNovo_contig_108127	gi|224381666|ref|NC_011462.1_TGU1|	67.54	3601	820	83	2122	5553	14728925	14732345	0	1164	3570	M
NorthernBobwhite_SimpleDeNovo_contig_10813	gi|224381666|ref|NC_011462.1_TGU1|	67.53	847	191	23	1137	1920	50947040	50947865	2e-66	260	179	M
NorthernBobwhite_SimpleDeNovo_contig_108161	gi|224381666|ref|NC_011462.1_TGU1|	75.12	2038	373	37	4521	6462	58356241	58354242	0	1344	75	M
NorthernBobwhite_SimpleDeNovo_contig_108260	gi|224381666|ref|NC_011462.1_TGU1|	69.78	1006	212	21	24	1020	99940658	99939736	2e-118	432	78	M
NorthernBobwhite_SimpleDeNovo_contig_108357	gi|224381666|ref|NC_011462.1_TGU1|	71.36	391	83	9	6	368	90731061	90731450	1e-44	187	11199	M
NorthernBobwhite_SimpleDeNovo_contig_108491	gi|224381666|ref|NC_011462.1_TGU1|	72.66	1719	382	27	3969	5646	37209297	37210968	0	939	33071	M
NorthernBobwhite_SimpleDeNovo_contig_10850	gi|224381666|ref|NC_011462.1_TGU1|	72.92	1141	254	28	2264	3380	17977638	17978747	3e-165	589	902	M
NorthernBobwhite_SimpleDeNovo_contig_108557	gi|224381666|ref|NC_011462.1_TGU1|	79.65	570	102	2	1881	2450	561307	561862	2e-141	509	704	M
NorthernBobwhite_SimpleDeNovo_contig_108582	gi|224381666|ref|NC_011462.1_TGU1|	81.25	256	44	3	444	696	78540175	78539921	3e-59	235	290	M
NorthernBobwhite_SimpleDeNovo_contig_108604	gi|224381666|ref|NC_011462.1_TGU1|	72.4	337	77	8	144	472	32455234	32454906	1e-38	167	6102	M
NorthernBobwhite_SimpleDeNovo_contig_108625	gi|224381666|ref|NC_011462.1_TGU1|	90.91	33	2	1	159	190	2244754	2244786	0.056	42.8	59	M
NorthernBobwhite_SimpleDeNovo_contig_108690	gi|224381666|ref|NC_011462.1_TGU1|	68.5	1343	298	36	638	1917	76138815	76137535	8e-129	466	87	M
NorthernBobwhite_SimpleDeNovo_contig_108741	gi|224381666|ref|NC_011462.1_TGU1|	70.17	476	97	16	703	1146	101270390	101269928	2e-44	187	8492	M
NorthernBobwhite_SimpleDeNovo_contig_108826	gi|224381666|ref|NC_011462.1_TGU1|	75.33	1228	225	22	61	1235	6161415	6160213	0	820	195	M
NorthernBobwhite_SimpleDeNovo_contig_10883	gi|224381666|ref|NC_011462.1_TGU1|	75.38	333	64	5	8	334	92409338	92409018	5e-56	224	66	M
[truncated: 373,926+ more rows]
