# Supplementary material for: A Draft De Novo Genome Assembly for the Northern Bobwhite (Colinus virginianus) Reveals Evidence for a Rapid Decline in Effective Population Size Beginning in the Late Pleistocene
Source: PLoS One. 2014 Mar 12;9(3):e90240. doi: 10.1371/journal.pone.0090240 (PMC3951200; doi:10.1371/journal.pone.0090240)
Supplement: Table S3 — NB1.1 Comparative Genome Aligment to Chicken (S3a) and Zebra Finch (S3b). (XLSX) [file pone.0090240.s003.xlsx]

## Sheet: Chicken 4.0
Table S3-A NB1.1 Comparative Genome Aligment to Chicken
Query	Hit/Subject Chromosome	% Identity	Align Length	Mismatches	Gaps	q-start	q-end	hit-start	hit-end	evalue	bitscore	Total hits	Single or Multi Chromosome
NorthernBobwhite_ScaffoldedDeNovo_contig_165170	gi|358485511|ref|NC_006088.3 | GGA1	82.35	51	8	1	4	54	11661	11612	0.001	48.2	76	M
NorthernBobwhite_ScaffoldedDeNovo_contig_47411	gi|358485511|ref|NC_006088.3 | GGA1	87.68	203	22	1	86	285	31323	31121	1e-64	251	1	S
NorthernBobwhite_ScaffoldedDeNovo_contig_158278	gi|358485511|ref|NC_006088.3 | GGA1	77.7	148	24	3	367	507	32699	32554	4e-23	113	1	S
NorthernBobwhite_ScaffoldedDeNovo_contig_173841	gi|358485511|ref|NC_006088.3 | GGA1	75.68	148	27	4	363	503	32699	32554	1e-17	95.1	35	M
NorthernBobwhite_ScaffoldedDeNovo_contig_47410	gi|358485511|ref|NC_006088.3 | GGA1	74.42	563	110	8	1	552	33382	33921	7e-98	361	6	M
NorthernBobwhite_ScaffoldedDeNovo_contig_36376	gi|358485511|ref|NC_006088.3 | GGA1	85.57	298	40	1	330	624	34648	34351	8e-92	342	1609	M
NorthernBobwhite_ScaffoldedDeNovo_contig_158277	gi|358485511|ref|NC_006088.3 | GGA1	81.9	652	82	5	1	632	35922	36557	0	654	1	S
NorthernBobwhite_ScaffoldedDeNovo_contig_99177	gi|358485511|ref|NC_006088.3 | GGA1	70.31	458	118	9	113	557	37225	36773	1e-45	188	40	M
NorthernBobwhite_ScaffoldedDeNovo_contig_151796	gi|358485511|ref|NC_006088.3 | GGA1	85.87	184	25	1	26	208	41090	41273	6e-53	212	2	S
NorthernBobwhite_ScaffoldedDeNovo_contig_118689	gi|358485511|ref|NC_006088.3 | GGA1	85.26	251	26	5	314	557	42591	42345	2e-71	273	2	S
NorthernBobwhite_ScaffoldedDeNovo_contig_31501	gi|358485511|ref|NC_006088.3 | GGA1	76.6	1406	208	22	37	1363	44536	43173	0	1063	2	S
NorthernBobwhite_ScaffoldedDeNovo_contig_119449	gi|358485511|ref|NC_006088.3 | GGA1	78.16	412	60	11	3	386	45901	46310	5e-84	315	1	S
NorthernBobwhite_ScaffoldedDeNovo_contig_23804	gi|358485511|ref|NC_006088.3 | GGA1	74.89	1418	236	33	1	1324	45924	44533	0	911	1	S
NorthernBobwhite_ScaffoldedDeNovo_contig_164764	gi|358485511|ref|NC_006088.3 | GGA1	74.55	224	45	2	110	332	49697	49485	4e-34	149	1	S
NorthernBobwhite_ScaffoldedDeNovo_contig_9257	gi|358485511|ref|NC_006088.3 | GGA1	79.23	2508	386	33	170	2570	52989	50510	0	2147	2062	M
NorthernBobwhite_ScaffoldedDeNovo_contig_73110	gi|358485511|ref|NC_006088.3 | GGA1	79.72	217	32	5	1	212	53205	52996	7e-44	181	192	M
NorthernBobwhite_ScaffoldedDeNovo_contig_68123	gi|358485511|ref|NC_006088.3 | GGA1	81.81	797	94	12	89	848	56268	55486	0	776	1	S
NorthernBobwhite_ScaffoldedDeNovo_contig_136260	gi|358485511|ref|NC_006088.3 | GGA1	85.13	390	56	1	3	390	56672	56283	2e-121	439	1	S
NorthernBobwhite_ScaffoldedDeNovo_contig_12520	gi|358485511|ref|NC_006088.3 | GGA1	89.61	5455	534	8	4189	9613	56925	62376	0	7276	1059	M
NorthernBobwhite_ScaffoldedDeNovo_contig_15651	gi|358485511|ref|NC_006088.3 | GGA1	82.33	928	135	5	5994	6910	70507	69598	0	939	58	M
NorthernBobwhite_ScaffoldedDeNovo_contig_106075	gi|358485511|ref|NC_006088.3 | GGA1	78.16	174	28	3	25	198	72845	72682	1e-30	138	1	S
NorthernBobwhite_ScaffoldedDeNovo_contig_81225	gi|358485511|ref|NC_006088.3 | GGA1	76.94	1132	185	13	36	1119	76069	74966	0	875	213	M
NorthernBobwhite_ScaffoldedDeNovo_contig_157196	gi|358485511|ref|NC_006088.3 | GGA1	76.71	219	46	3	26	239	76353	76135	3e-36	156	1	S
NorthernBobwhite_ScaffoldedDeNovo_contig_78609	gi|358485511|ref|NC_006088.3 | GGA1	75.28	1768	276	35	5312	6968	80445	82162	0	1205	458	M
NorthernBobwhite_ScaffoldedDeNovo_contig_105057	gi|358485511|ref|NC_006088.3 | GGA1	73.14	700	112	11	1	676	80470	79823	1e-119	434	1409	M
NorthernBobwhite_ScaffoldedDeNovo_contig_184698	gi|358485511|ref|NC_006088.3 | GGA1	71.79	468	72	10	1	457	80470	80052	4e-67	259	1699	M
NorthernBobwhite_ScaffoldedDeNovo_contig_105058	gi|358485511|ref|NC_006088.3 | GGA1	73.69	498	104	11	3	480	82750	83240	5e-74	282	1	S
NorthernBobwhite_ScaffoldedDeNovo_contig_163240	gi|358485511|ref|NC_006088.3 | GGA1	70	370	83	9	115	462	83227	82864	5e-35	152	1	S
NorthernBobwhite_ScaffoldedDeNovo_contig_11992	gi|358485511|ref|NC_006088.3 | GGA1	79.05	3498	504	42	4325	7705	88331	84946	0	3021	5768	M
NorthernBobwhite_ScaffoldedDeNovo_contig_114603	gi|358485511|ref|NC_006088.3 | GGA1	83.57	140	22	1	1	139	90113	89974	6e-33	145	161	M
NorthernBobwhite_ScaffoldedDeNovo_contig_31134	gi|358485511|ref|NC_006088.3 | GGA1	78.31	272	46	2	210	468	94729	95000	1e-57	228	2171	M
NorthernBobwhite_ScaffoldedDeNovo_contig_54412	gi|358485511|ref|NC_006088.3 | GGA1	76.95	243	46	3	113	354	94793	94560	1e-43	181	2	S
NorthernBobwhite_ScaffoldedDeNovo_contig_97504	gi|358485511|ref|NC_006088.3 | GGA1	81.58	467	80	4	225	689	95539	95077	3e-122	443	2	S
NorthernBobwhite_ScaffoldedDeNovo_contig_117166	gi|358485511|ref|NC_006088.3 | GGA1	72.61	752	139	9	1	692	96032	96776	7e-124	448	1	S
NorthernBobwhite_ScaffoldedDeNovo_contig_156572	gi|358485511|ref|NC_006088.3 | GGA1	83.52	273	38	2	1	267	96940	97211	6e-76	288	1	S
NorthernBobwhite_ScaffoldedDeNovo_contig_78255	gi|358485511|ref|NC_006088.3 | GGA1	75.74	1381	256	22	1958	3272	99267	100634	0	953	959	M
NorthernBobwhite_ScaffoldedDeNovo_contig_91230	gi|358485511|ref|NC_006088.3 | GGA1	81.17	685	85	7	3	677	105247	104597	0	663	1	S
NorthernBobwhite_ScaffoldedDeNovo_contig_109947	gi|358485511|ref|NC_006088.3 | GGA1	78.72	376	44	9	21	362	106128	106501	2e-82	309	1	S
NorthernBobwhite_ScaffoldedDeNovo_contig_57324	gi|358485511|ref|NC_006088.3 | GGA1	90.16	122	9	1	49	167	106519	106640	8e-39	165	733	M
NorthernBobwhite_ScaffoldedDeNovo_contig_49167	gi|358485511|ref|NC_006088.3 | GGA1	72.84	891	138	21	275	1073	107550	106672	9e-144	515	9646	M
NorthernBobwhite_ScaffoldedDeNovo_contig_19397	gi|358485511|ref|NC_006088.3 | GGA1	73.92	487	67	11	165	607	110574	111044	1e-82	311	1878	M
NorthernBobwhite_ScaffoldedDeNovo_contig_37610	gi|358485511|ref|NC_006088.3 | GGA1	78.27	2734	346	47	8572	11215	110719	108144	0	2264	3231	M
NorthernBobwhite_ScaffoldedDeNovo_contig_105546	gi|358485511|ref|NC_006088.3 | GGA1	87.88	33	4	0	315	347	110930	110962	0.22	42.8	17	M
NorthernBobwhite_ScaffoldedDeNovo_contig_71312	gi|358485511|ref|NC_006088.3 | GGA1	78.25	423	68	6	1	419	111681	112083	1e-92	343	1	S
NorthernBobwhite_ScaffoldedDeNovo_contig_114490	gi|358485511|ref|NC_006088.3 | GGA1	81.5	319	53	2	1	313	111902	111584	2e-81	306	2	S
NorthernBobwhite_ScaffoldedDeNovo_contig_1127	gi|358485511|ref|NC_006088.3 | GGA1	79.08	239	49	1	1	239	112567	112804	5e-50	203	3	S
NorthernBobwhite_ScaffoldedDeNovo_contig_173092	gi|358485511|ref|NC_006088.3 | GGA1	73.29	146	25	4	57	188	113284	113429	2e-13	82.4	71	M
NorthernBobwhite_ScaffoldedDeNovo_contig_5911	gi|358485511|ref|NC_006088.3 | GGA1	78.06	278	56	2	119	396	113483	113211	3e-56	223	1	S
NorthernBobwhite_ScaffoldedDeNovo_contig_8947	gi|358485511|ref|NC_006088.3 | GGA1	74.68	616	123	10	1345	1953	113670	113081	2e-106	392	1509	M
NorthernBobwhite_ScaffoldedDeNovo_contig_7294	gi|358485511|ref|NC_006088.3 | GGA1	72.32	271	53	7	32	289	113771	113510	2e-31	140	2	S
NorthernBobwhite_ScaffoldedDeNovo_contig_46271	gi|358485511|ref|NC_006088.3 | GGA1	72.23	443	100	10	300	734	113802	113375	2e-55	221	3	M
NorthernBobwhite_ScaffoldedDeNovo_contig_56651	gi|358485511|ref|NC_006088.3 | GGA1	87.83	378	42	1	1	374	117189	116812	9e-132	473	1	S
NorthernBobwhite_ScaffoldedDeNovo_contig_6566	gi|358485511|ref|NC_006088.3 | GGA1	77.89	805	126	5	512	1278	122932	122142	0	673	9	M
NorthernBobwhite_ScaffoldedDeNovo_contig_28816	gi|358485511|ref|NC_006088.3 | GGA1	81.37	424	64	3	2	418	125072	125487	7e-112	408	1166	M
NorthernBobwhite_ScaffoldedDeNovo_contig_138875	gi|358485511|ref|NC_006088.3 | GGA1	79.53	298	45	3	2	284	125175	125471	1e-68	264	508	M
NorthernBobwhite_ScaffoldedDeNovo_contig_73199	gi|358485511|ref|NC_006088.3 | GGA1	79.8	297	45	6	2	294	125188	125473	5e-65	251	929	M
NorthernBobwhite_ScaffoldedDeNovo_contig_75884	gi|358485511|ref|NC_006088.3 | GGA1	77.29	938	124	17	2707	3596	129053	129949	0	735	7	M
NorthernBobwhite_ScaffoldedDeNovo_contig_71686	gi|358485511|ref|NC_006088.3 | GGA1	77.13	258	38	3	231	487	132098	132335	2e-50	205	2	S
NorthernBobwhite_ScaffoldedDeNovo_contig_53746	gi|358485511|ref|NC_006088.3 | GGA1	87.11	287	28	3	578	855	133406	133120	4e-93	347	5	M
NorthernBobwhite_ScaffoldedDeNovo_contig_33791	gi|358485511|ref|NC_006088.3 | GGA1	69.48	521	91	19	108	612	134577	135045	5e-49	199	1	S
NorthernBobwhite_ScaffoldedDeNovo_contig_42467	gi|358485511|ref|NC_006088.3 | GGA1	69.88	986	181	26	323	1222	136532	135577	4e-117	426	1	S
NorthernBobwhite_ScaffoldedDeNovo_contig_59793	gi|358485511|ref|NC_006088.3 | GGA1	69.89	186	45	6	143	317	137028	137213	4e-09	66.2	29	M
NorthernBobwhite_ScaffoldedDeNovo_contig_23028	gi|358485511|ref|NC_006088.3 | GGA1	76.01	3193	413	54	238	3168	137347	140448	0	2379	33	M
NorthernBobwhite_ScaffoldedDeNovo_contig_67374	gi|358485511|ref|NC_006088.3 | GGA1	73.26	374	65	7	7	370	137356	137008	7e-57	224	7	S
NorthernBobwhite_ScaffoldedDeNovo_contig_80697	gi|358485511|ref|NC_006088.3 | GGA1	79.16	1118	150	11	1948	3012	144027	145114	0	991	4713	M
NorthernBobwhite_ScaffoldedDeNovo_contig_126838	gi|358485511|ref|NC_006088.3 | GGA1	77.78	63	11	1	122	184	149519	149578	0.0003	50	5	M
NorthernBobwhite_ScaffoldedDeNovo_contig_186863	gi|358485511|ref|NC_006088.3 | GGA1	81.65	109	20	0	293	401	149574	149466	2e-21	107	1	S
NorthernBobwhite_ScaffoldedDeNovo_contig_210833	gi|358485511|ref|NC_006088.3 | GGA1	77.59	116	26	0	301	416	149581	149466	3e-17	93.3	71	M
NorthernBobwhite_ScaffoldedDeNovo_contig_9086	gi|358485511|ref|NC_006088.3 | GGA1	81.38	1740	228	19	1828	3520	150827	152517	0	1678	7	S
NorthernBobwhite_ScaffoldedDeNovo_contig_33558	gi|358485511|ref|NC_006088.3 | GGA1	68.13	568	78	11	11	529	156964	157477	8e-65	251	2	S
NorthernBobwhite_ScaffoldedDeNovo_contig_148442	gi|358485511|ref|NC_006088.3 | GGA1	75.07	690	95	19	15	659	158562	157905	1e-125	453	1	S
NorthernBobwhite_ScaffoldedDeNovo_contig_164141	gi|358485511|ref|NC_006088.3 | GGA1	93.33	30	2	0	1825	1854	158706	158677	0.034	46.4	6	M
NorthernBobwhite_ScaffoldedDeNovo_contig_51051	gi|358485511|ref|NC_006088.3 | GGA1	85.86	403	49	2	628	1022	159770	160172	1e-129	468	2	S
NorthernBobwhite_ScaffoldedDeNovo_contig_88224	gi|358485511|ref|NC_006088.3 | GGA1	89.04	73	8	0	429	501	162204	162132	5e-18	96.9	1993	M
NorthernBobwhite_ScaffoldedDeNovo_contig_50191	gi|358485511|ref|NC_006088.3 | GGA1	84.06	458	58	2	2	456	163535	163090	2e-140	502	1	S
NorthernBobwhite_ScaffoldedDeNovo_contig_138847	gi|358485511|ref|NC_006088.3 | GGA1	72.29	83	20	1	499	581	163600	163679	0.033	44.6	97	M
NorthernBobwhite_ScaffoldedDeNovo_contig_111169	gi|358485511|ref|NC_006088.3 | GGA1	80.39	51	9	1	206	255	183617	183667	0.012	44.6	12	M
NorthernBobwhite_ScaffoldedDeNovo_contig_65994	gi|358485511|ref|NC_006088.3 | GGA1	79.9	204	41	0	49	252	186010	186213	4e-44	183	1	S
NorthernBobwhite_ScaffoldedDeNovo_contig_94721	gi|358485511|ref|NC_006088.3 | GGA1	86.27	743	89	2	1	730	194291	193549	0	883	1080	M
NorthernBobwhite_ScaffoldedDeNovo_contig_133972	gi|358485511|ref|NC_006088.3 | GGA1	86.9	374	37	1	1	362	194638	195011	5e-128	461	1	S
NorthernBobwhite_ScaffoldedDeNovo_contig_97595	gi|358485511|ref|NC_006088.3 | GGA1	86.63	374	38	1	7	368	195011	194638	2e-126	455	1	S
NorthernBobwhite_ScaffoldedDeNovo_contig_17222	gi|358485511|ref|NC_006088.3 | GGA1	82.57	4561	571	48	747	5143	199492	194992	0	4626	6449	M
NorthernBobwhite_ScaffoldedDeNovo_contig_51338	gi|358485511|ref|NC_006088.3 | GGA1	79.82	342	63	3	1853	2190	201808	202147	4e-78	298	3	S
NorthernBobwhite_ScaffoldedDeNovo_contig_15581	gi|358485511|ref|NC_006088.3 | GGA1	77.65	4502	718	53	12971	17325	214146	209786	0	3604	12974	M
NorthernBobwhite_ScaffoldedDeNovo_contig_175434	gi|358485511|ref|NC_006088.3 | GGA1	79.95	374	65	6	5	377	222246	221882	4e-85	318	7	M
NorthernBobwhite_ScaffoldedDeNovo_contig_130216	gi|358485511|ref|NC_006088.3 | GGA1	79.28	304	49	3	107	399	228321	228021	1e-68	264	4447	M
NorthernBobwhite_ScaffoldedDeNovo_contig_79737	gi|358485511|ref|NC_006088.3 | GGA1	78.33	300	63	2	1	299	234129	234427	7e-62	241	1	S
NorthernBobwhite_ScaffoldedDeNovo_contig_183627	gi|358485511|ref|NC_006088.3 | GGA1	82.08	173	31	0	13	185	236231	236403	3e-41	172	1	S
NorthernBobwhite_ScaffoldedDeNovo_contig_2212	gi|358485511|ref|NC_006088.3 | GGA1	79.57	3334	472	46	8249	11489	236430	239647	0	2924	32455	M
NorthernBobwhite_ScaffoldedDeNovo_contig_67800	gi|358485511|ref|NC_006088.3 | GGA1	86.83	281	35	2	272	551	247155	247434	3e-89	333	2	S
NorthernBobwhite_ScaffoldedDeNovo_contig_125685	gi|358485511|ref|NC_006088.3 | GGA1	87.5	336	40	1	1	336	247541	247874	1e-113	414	2	S
NorthernBobwhite_ScaffoldedDeNovo_contig_95586	gi|358485511|ref|NC_006088.3 | GGA1	83.84	198	19	2	5083	5279	254463	254278	6e-53	215	2	S
NorthernBobwhite_ScaffoldedDeNovo_contig_153479	gi|358485511|ref|NC_006088.3 | GGA1	83.49	327	43	2	1	317	254792	254467	7e-94	347	1	S
NorthernBobwhite_ScaffoldedDeNovo_contig_12047	gi|358485511|ref|NC_006088.3 | GGA1	73.49	298	55	7	1	279	256009	256301	6e-41	172	1	S
NorthernBobwhite_ScaffoldedDeNovo_contig_12048	gi|358485511|ref|NC_006088.3 | GGA1	77.08	96	18	1	1	92	256009	256104	3e-11	73.4	55	M
NorthernBobwhite_ScaffoldedDeNovo_contig_4098	gi|358485511|ref|NC_006088.3 | GGA1	74.97	2333	289	36	25168	27403	262796	264930	0	1678	563	M
NorthernBobwhite_ScaffoldedDeNovo_contig_42055	gi|358485511|ref|NC_006088.3 | GGA1	77.77	1399	214	34	11	1330	269805	268425	0	1056	288	M
NorthernBobwhite_ScaffoldedDeNovo_contig_61431	gi|358485511|ref|NC_006088.3 | GGA1	82.1	1000	165	7	1	988	272613	273610	0	978	1	S
NorthernBobwhite_ScaffoldedDeNovo_contig_46694	gi|358485511|ref|NC_006088.3 | GGA1	82.74	1188	162	11	2394	3541	275962	277146	0	1207	252	M
NorthernBobwhite_ScaffoldedDeNovo_contig_124851	gi|358485511|ref|NC_006088.3 | GGA1	83.54	1057	150	7	8	1052	280819	281863	0	1112	28	M
NorthernBobwhite_ScaffoldedDeNovo_contig_63479	gi|358485511|ref|NC_006088.3 | GGA1	81.67	180	29	1	268	447	283088	283263	6e-42	176	17	S
NorthernBobwhite_ScaffoldedDeNovo_contig_86713	gi|358485511|ref|NC_006088.3 | GGA1	81.87	182	27	1	285	466	283088	283263	1e-43	181	16	S
NorthernBobwhite_ScaffoldedDeNovo_contig_86714	gi|358485511|ref|NC_006088.3 | GGA1	88.16	304	33	2	1	301	283537	283234	1e-103	379	1	S
NorthernBobwhite_ScaffoldedDeNovo_contig_46759	gi|358485511|ref|NC_006088.3 | GGA1	76.23	551	74	10	1	541	283649	284152	2e-112	410	3327	M
NorthernBobwhite_ScaffoldedDeNovo_contig_15743	gi|358485511|ref|NC_006088.3 | GGA1	79.18	269	44	5	1	266	285155	285414	8e-56	221	271	M
NorthernBobwhite_ScaffoldedDeNovo_contig_15742	gi|358485511|ref|NC_006088.3 | GGA1	80.62	227	34	4	28	253	285197	285414	2e-50	203	7	M
NorthernBobwhite_ScaffoldedDeNovo_contig_42650	gi|358485511|ref|NC_006088.3 | GGA1	76.54	503	77	9	13	501	286523	286048	3e-101	372	1	S
NorthernBobwhite_ScaffoldedDeNovo_contig_208076	gi|358485511|ref|NC_006088.3 | GGA1	85	40	5	1	112	150	290111	290150	0.045	42.8	43	M
NorthernBobwhite_ScaffoldedDeNovo_contig_9834	gi|358485511|ref|NC_006088.3 | GGA1	77.93	4092	570	56	38539	42463	290460	286535	0	3357	14633	M
NorthernBobwhite_ScaffoldedDeNovo_contig_118212	gi|358485511|ref|NC_006088.3 | GGA1	71.04	221	56	8	1	214	290669	290450	1e-13	82.4	51	M
NorthernBobwhite_ScaffoldedDeNovo_contig_118211	gi|358485511|ref|NC_006088.3 | GGA1	69.44	144	41	3	10	150	290669	290526	0.0002	51.8	22	M
NorthernBobwhite_ScaffoldedDeNovo_contig_155854	gi|358485511|ref|NC_006088.3 | GGA1	77.36	296	59	1	81	368	306511	306806	4e-60	235	64	M
NorthernBobwhite_ScaffoldedDeNovo_contig_74687	gi|358485511|ref|NC_006088.3 | GGA1	82.93	205	33	1	5	209	306901	306699	2e-52	210	571	M
NorthernBobwhite_ScaffoldedDeNovo_contig_160630	gi|358485511|ref|NC_006088.3 | GGA1	77.86	280	58	4	7	285	306919	306643	4e-53	212	71	M
NorthernBobwhite_ScaffoldedDeNovo_contig_121559	gi|358485511|ref|NC_006088.3 | GGA1	81.97	305	54	1	93	397	306976	306673	4e-79	298	3306	M
NorthernBobwhite_ScaffoldedDeNovo_contig_79082	gi|358485511|ref|NC_006088.3 | GGA1	74.37	593	105	12	52	608	327952	327371	5e-101	372	1	S
NorthernBobwhite_ScaffoldedDeNovo_contig_217394	gi|358485511|ref|NC_006088.3 | GGA1	74.27	171	32	5	127	295	328241	328081	6e-19	98.7	58	M
NorthernBobwhite_ScaffoldedDeNovo_contig_61536	gi|358485511|ref|NC_006088.3 | GGA1	74.62	1119	188	24	11	1037	330395	331509	0	717	1	S
NorthernBobwhite_ScaffoldedDeNovo_contig_77617	gi|358485511|ref|NC_006088.3 | GGA1	84.29	401	46	3	1	400	333681	333297	8e-122	441	133	M
NorthernBobwhite_ScaffoldedDeNovo_contig_217459	gi|358485511|ref|NC_006088.3 | GGA1	88.89	36	3	1	672	706	339352	339317	0.027	44.6	67	M
NorthernBobwhite_ScaffoldedDeNovo_contig_5017	gi|358485511|ref|NC_006088.3 | GGA1	72.94	1445	255	34	629	1982	340133	338734	0	812	7	S
NorthernBobwhite_ScaffoldedDeNovo_contig_22091	gi|358485511|ref|NC_006088.3 | GGA1	83.98	805	126	2	4391	5195	342772	341971	0	865	2807	M
NorthernBobwhite_ScaffoldedDeNovo_contig_42716	gi|358485511|ref|NC_006088.3 | GGA1	80.13	312	50	3	2	305	349340	349647	8e-74	280	7	M
NorthernBobwhite_ScaffoldedDeNovo_contig_174778	gi|358485511|ref|NC_006088.3 | GGA1	78.2	344	52	5	58	395	350783	351109	1e-73	280	1	S
NorthernBobwhite_ScaffoldedDeNovo_contig_74999	gi|358485511|ref|NC_006088.3 | GGA1	79.41	136	16	3	19	152	351667	351792	2e-24	116	1	S
NorthernBobwhite_ScaffoldedDeNovo_contig_81383	gi|358485511|ref|NC_006088.3 | GGA1	80.88	136	14	3	19	152	351667	351792	4e-27	125	1	S
NorthernBobwhite_ScaffoldedDeNovo_contig_81382	gi|358485511|ref|NC_006088.3 | GGA1	75.2	1379	235	22	1	1299	354142	352791	0	942	1	S
NorthernBobwhite_ScaffoldedDeNovo_contig_88220	gi|358485511|ref|NC_006088.3 | GGA1	75.91	303	57	7	3	297	354626	354920	7e-50	201	1	S
NorthernBobwhite_ScaffoldedDeNovo_contig_43979	gi|358485511|ref|NC_006088.3 | GGA1	74.95	515	94	7	1	487	357498	356991	1e-93	347	1	S
NorthernBobwhite_ScaffoldedDeNovo_contig_48908	gi|358485511|ref|NC_006088.3 | GGA1	77.15	871	141	19	1615	2438	358458	357599	0	641	407	M
NorthernBobwhite_ScaffoldedDeNovo_contig_126784	gi|358485511|ref|NC_006088.3 | GGA1	85.82	134	18	1	420	552	359806	359939	6e-35	152	359	M
NorthernBobwhite_ScaffoldedDeNovo_contig_178865	gi|358485511|ref|NC_006088.3 | GGA1	74.39	289	54	11	377	653	359901	359621	6e-36	156	59	M
NorthernBobwhite_ScaffoldedDeNovo_contig_213369	gi|358485511|ref|NC_006088.3 | GGA1	70.35	199	29	6	71	266	360667	360838	3e-17	93.3	57	M
NorthernBobwhite_ScaffoldedDeNovo_contig_182585	gi|358485511|ref|NC_006088.3 | GGA1	92.25	284	20	1	123	404	361545	361828	1e-112	410	1	S
NorthernBobwhite_ScaffoldedDeNovo_contig_117693	gi|358485511|ref|NC_006088.3 | GGA1	72.55	153	25	8	115	267	362653	362518	3e-09	66.2	10	M
NorthernBobwhite_ScaffoldedDeNovo_contig_59540	gi|358485511|ref|NC_006088.3 | GGA1	68.28	372	72	7	5	345	364957	365313	1e-33	149	1	S
NorthernBobwhite_ScaffoldedDeNovo_contig_57541	gi|358485511|ref|NC_006088.3 | GGA1	74.05	289	51	9	374	640	366508	366794	1e-38	165	96	M
NorthernBobwhite_ScaffoldedDeNovo_contig_88792	gi|358485511|ref|NC_006088.3 | GGA1	93.75	32	0	2	492	522	367410	367440	0.082	42.8	24	M
NorthernBobwhite_ScaffoldedDeNovo_contig_61442	gi|358485511|ref|NC_006088.3 | GGA1	69.86	720	134	24	204	847	367475	366763	2e-75	288	16	M
NorthernBobwhite_ScaffoldedDeNovo_contig_26145	gi|358485511|ref|NC_006088.3 | GGA1	77.94	417	79	6	16	421	368881	369295	2e-85	322	13	M
NorthernBobwhite_ScaffoldedDeNovo_contig_25014	gi|358485511|ref|NC_006088.3 | GGA1	73.99	469	76	14	613	1058	371039	370594	1e-71	275	2	S
NorthernBobwhite_ScaffoldedDeNovo_contig_15145	gi|358485511|ref|NC_006088.3 | GGA1	79.09	574	83	16	2498	3040	372064	372631	4e-125	455	2054	M
NorthernBobwhite_ScaffoldedDeNovo_contig_123118	gi|358485511|ref|NC_006088.3 | GGA1	78.6	486	95	6	574	1051	372554	372070	6e-108	396	1411	M
NorthernBobwhite_ScaffoldedDeNovo_contig_99406	gi|358485511|ref|NC_006088.3 | GGA1	68.36	354	71	13	523	853	374173	373838	8e-23	113	1	S
NorthernBobwhite_ScaffoldedDeNovo_contig_27418	gi|358485511|ref|NC_006088.3 | GGA1	72.8	669	143	14	7	643	375272	375933	9e-97	358	23	S
NorthernBobwhite_ScaffoldedDeNovo_contig_97380	gi|358485511|ref|NC_006088.3 | GGA1	69.02	1036	185	32	2	921	376965	377980	4e-109	399	1	S
NorthernBobwhite_ScaffoldedDeNovo_contig_35140	gi|358485511|ref|NC_006088.3 | GGA1	80.04	486	58	7	969	1443	379572	380029	6e-122	443	1018	M
NorthernBobwhite_ScaffoldedDeNovo_contig_150705	gi|358485511|ref|NC_006088.3 | GGA1	79.34	242	40	3	1086	1322	383385	383149	7e-51	206	3176	M
NorthernBobwhite_ScaffoldedDeNovo_contig_62660	gi|358485511|ref|NC_006088.3 | GGA1	75.14	177	23	7	12	171	384987	384815	5e-22	109	1	S
NorthernBobwhite_ScaffoldedDeNovo_contig_35906	gi|358485511|ref|NC_006088.3 | GGA1	70.18	882	182	19	1	803	386350	385471	5e-107	392	1	S
NorthernBobwhite_ScaffoldedDeNovo_contig_7140	gi|358485511|ref|NC_006088.3 | GGA1	66.12	850	169	29	1	761	386602	387421	1e-52	212	1	S
NorthernBobwhite_ScaffoldedDeNovo_contig_203120	gi|358485511|ref|NC_006088.3 | GGA1	84.92	325	38	7	240	558	387544	387863	2e-92	343	1	S
NorthernBobwhite_ScaffoldedDeNovo_contig_120286	gi|358485511|ref|NC_006088.3 | GGA1	82.22	45	8	0	392	436	409130	409174	0.005	46.4	23	M
NorthernBobwhite_ScaffoldedDeNovo_contig_35836	gi|358485511|ref|NC_006088.3 | GGA1	77.47	324	53	5	6	314	409314	408996	4e-65	251	170	M
NorthernBobwhite_ScaffoldedDeNovo_contig_142143	gi|358485511|ref|NC_006088.3 | GGA1	74.22	322	55	13	3	305	409325	409013	9e-42	174	62	M
NorthernBobwhite_ScaffoldedDeNovo_contig_51285	gi|358485511|ref|NC_006088.3 | GGA1	76.52	264	50	3	20	271	409384	409121	1e-47	194	75	M
NorthernBobwhite_ScaffoldedDeNovo_contig_153328	gi|358485511|ref|NC_006088.3 | GGA1	93.33	30	2	0	1	30	410712	410741	0.003	46.4	103	M
NorthernBobwhite_ScaffoldedDeNovo_contig_147547	gi|358485511|ref|NC_006088.3 | GGA1	74.45	227	48	3	140	361	411359	411138	2e-32	143	6	M
NorthernBobwhite_ScaffoldedDeNovo_contig_144798	gi|358485511|ref|NC_006088.3 | GGA1	85.21	534	79	0	25	558	420776	421309	9e-172	607	1	S
NorthernBobwhite_ScaffoldedDeNovo_contig_125470	gi|358485511|ref|NC_006088.3 | GGA1	70.54	336	51	8	46	335	425564	425231	2e-39	167	22	M
NorthernBobwhite_ScaffoldedDeNovo_contig_89315	gi|358485511|ref|NC_006088.3 | GGA1	80.61	428	75	2	101	520	426461	426034	3e-108	396	577	M
NorthernBobwhite_ScaffoldedDeNovo_contig_84150	gi|358485511|ref|NC_006088.3 | GGA1	73.71	483	72	11	43	496	426921	427377	5e-79	298	1	S
NorthernBobwhite_ScaffoldedDeNovo_contig_11534	gi|358485511|ref|NC_006088.3 | GGA1	82.69	2334	281	21	6465	8697	444729	442418	0	2405	3137	M
NorthernBobwhite_ScaffoldedDeNovo_contig_71533	gi|358485511|ref|NC_006088.3 | GGA1	80.02	1131	141	15	31	1082	449523	448399	0	1031	437	M
NorthernBobwhite_ScaffoldedDeNovo_contig_37116	gi|358485511|ref|NC_006088.3 | GGA1	73.2	403	82	11	1030	1420	455890	455502	2e-52	214	3	S
NorthernBobwhite_ScaffoldedDeNovo_contig_91023	gi|358485511|ref|NC_006088.3 | GGA1	77.53	178	28	5	8	181	462471	462302	8e-28	129	1	S
NorthernBobwhite_ScaffoldedDeNovo_contig_49299	gi|358485511|ref|NC_006088.3 | GGA1	82.64	144	22	3	220	361	469116	468974	3e-30	136	2	S
NorthernBobwhite_ScaffoldedDeNovo_contig_96429	gi|358485511|ref|NC_006088.3 | GGA1	83.33	54	9	0	312	365	470432	470485	4e-06	57.2	461	M
NorthernBobwhite_ScaffoldedDeNovo_contig_4886	gi|358485511|ref|NC_006088.3 | GGA1	77.5	160	36	0	1	160	471840	471999	2e-27	127	8	M
NorthernBobwhite_ScaffoldedDeNovo_contig_144535	gi|358485511|ref|NC_006088.3 | GGA1	76.35	334	65	8	159	481	472112	471782	3e-56	223	29	M
NorthernBobwhite_ScaffoldedDeNovo_contig_8347	gi|358485511|ref|NC_006088.3 | GGA1	76.1	1301	193	22	182	1409	479587	478332	0	951	1480	M
NorthernBobwhite_ScaffoldedDeNovo_contig_95086	gi|358485511|ref|NC_006088.3 | GGA1	73.05	167	22	8	387	530	484347	484513	5e-14	84.2	186	M
NorthernBobwhite_ScaffoldedDeNovo_contig_19775	gi|358485511|ref|NC_006088.3 | GGA1	78.16	1172	160	16	6062	7146	487375	488537	0	975	1993	M
NorthernBobwhite_ScaffoldedDeNovo_contig_151702	gi|358485511|ref|NC_006088.3 | GGA1	83.83	402	64	1	1	401	488756	489157	3e-118	428	1255	M
NorthernBobwhite_ScaffoldedDeNovo_contig_150022	gi|358485511|ref|NC_006088.3 | GGA1	74.85	338	56	6	42	366	488817	489138	2e-57	226	162	M
NorthernBobwhite_ScaffoldedDeNovo_contig_150023	gi|358485511|ref|NC_006088.3 | GGA1	77.23	325	60	6	45	368	488860	489171	3e-61	239	281	M
NorthernBobwhite_ScaffoldedDeNovo_contig_115589	gi|358485511|ref|NC_006088.3 | GGA1	80.32	371	72	1	1	370	489095	488725	2e-90	336	1098	M
NorthernBobwhite_ScaffoldedDeNovo_contig_65120	gi|358485511|ref|NC_006088.3 | GGA1	70.93	454	88	13	703	1147	489282	488864	2e-50	205	200	M
NorthernBobwhite_ScaffoldedDeNovo_contig_100562	gi|358485511|ref|NC_006088.3 | GGA1	79.34	334	52	5	257	575	489411	489080	1e-74	284	378	M
NorthernBobwhite_ScaffoldedDeNovo_contig_58570	gi|358485511|ref|NC_006088.3 | GGA1	85.39	746	89	8	1640	2366	490898	490154	0	836	87	M
NorthernBobwhite_ScaffoldedDeNovo_contig_154480	gi|358485511|ref|NC_006088.3 | GGA1	80.05	762	102	9	25	741	501767	501011	0	693	2	S
NorthernBobwhite_ScaffoldedDeNovo_contig_166918	gi|358485511|ref|NC_006088.3 | GGA1	79	600	79	11	29	599	503718	504299	7e-142	508	3899	M
NorthernBobwhite_ScaffoldedDeNovo_contig_14750	gi|358485511|ref|NC_006088.3 | GGA1	73.11	502	62	9	1	431	504389	504888	4e-86	322	1	S
NorthernBobwhite_ScaffoldedDeNovo_contig_115285	gi|358485511|ref|NC_006088.3 | GGA1	82.16	241	34	3	59	293	510220	509983	5e-60	235	1	S
NorthernBobwhite_ScaffoldedDeNovo_contig_40732	gi|358485511|ref|NC_006088.3 | GGA1	82.16	241	34	3	59	293	510220	509983	5e-60	235	1	S
NorthernBobwhite_ScaffoldedDeNovo_contig_11376	gi|358485511|ref|NC_006088.3 | GGA1	82.37	1384	155	20	18125	19449	511053	512406	0	1386	13611	M
NorthernBobwhite_ScaffoldedDeNovo_contig_114426	gi|358485511|ref|NC_006088.3 | GGA1	81.35	665	85	10	432	1064	519933	520590	2e-178	630	751	M
NorthernBobwhite_ScaffoldedDeNovo_contig_74308	gi|358485511|ref|NC_006088.3 | GGA1	77.5	1338	228	24	22	1325	520843	522141	0	1014	715	M
NorthernBobwhite_ScaffoldedDeNovo_contig_145483	gi|358485511|ref|NC_006088.3 | GGA1	89.83	295	21	4	3	293	528422	528133	2e-104	387	2	S
NorthernBobwhite_ScaffoldedDeNovo_contig_38305	gi|358485511|ref|NC_006088.3 | GGA1	77.49	191	33	2	1	182	530903	530714	2e-34	150	1	S
NorthernBobwhite_ScaffoldedDeNovo_contig_101198	gi|358485511|ref|NC_006088.3 | GGA1	75.72	346	63	3	12	337	532475	532819	5e-65	251	20	M
NorthernBobwhite_ScaffoldedDeNovo_contig_61850	gi|358485511|ref|NC_006088.3 | GGA1	79.26	135	27	1	1	135	532648	532781	1e-23	114	2	S
NorthernBobwhite_ScaffoldedDeNovo_contig_109759	gi|358485511|ref|NC_006088.3 | GGA1	74.08	490	95	4	5078	5562	533110	532648	6e-85	322	32	M
NorthernBobwhite_ScaffoldedDeNovo_contig_105078	gi|358485511|ref|NC_006088.3 | GGA1	74.12	85	13	4	6	86	533309	533388	0.11	44.6	30	M
NorthernBobwhite_ScaffoldedDeNovo_contig_59719	gi|358485511|ref|NC_006088.3 | GGA1	93.33	30	2	0	286	315	533351	533380	0.003	46.4	377	M
NorthernBobwhite_ScaffoldedDeNovo_contig_201247	gi|358485511|ref|NC_006088.3 | GGA1	78.57	56	9	1	54	109	533358	533410	0.032	46.4	76	M
NorthernBobwhite_ScaffoldedDeNovo_contig_147083	gi|358485511|ref|NC_006088.3 | GGA1	92.31	39	1	2	952	989	533363	533400	0.005	50	88	M
NorthernBobwhite_ScaffoldedDeNovo_contig_97918	gi|358485511|ref|NC_006088.3 | GGA1	79.17	528	69	13	158	679	533501	533993	4e-120	435	1	S
NorthernBobwhite_ScaffoldedDeNovo_contig_108249	gi|358485511|ref|NC_006088.3 | GGA1	88.53	462	44	5	423	882	536708	536254	2e-163	580	27	M
NorthernBobwhite_ScaffoldedDeNovo_contig_44790	gi|358485511|ref|NC_006088.3 | GGA1	85.9	610	64	6	194	784	536966	537572	0	706	3	S
NorthernBobwhite_ScaffoldedDeNovo_contig_118814	gi|358485511|ref|NC_006088.3 | GGA1	78.36	804	84	14	119	847	539902	540690	0	684	1	S
NorthernBobwhite_ScaffoldedDeNovo_contig_64803	gi|358485511|ref|NC_006088.3 | GGA1	86.13	375	33	6	46	415	542678	543038	3e-119	432	12	M
NorthernBobwhite_ScaffoldedDeNovo_contig_96584	gi|358485511|ref|NC_006088.3 | GGA1	78.91	1029	144	15	1	976	543091	544099	0	875	4	S
NorthernBobwhite_ScaffoldedDeNovo_contig_13079	gi|358485511|ref|NC_006088.3 | GGA1	82.38	2264	211	23	20277	22369	549459	547213	0	2351	3826	M
NorthernBobwhite_ScaffoldedDeNovo_contig_59073	gi|358485511|ref|NC_006088.3 | GGA1	85.75	435	45	3	217	636	550751	550319	7e-142	508	138	M
NorthernBobwhite_ScaffoldedDeNovo_contig_83556	gi|358485511|ref|NC_006088.3 | GGA1	80.1	613	73	11	1	572	550912	551516	6e-155	551	51	M
NorthernBobwhite_ScaffoldedDeNovo_contig_72395	gi|358485511|ref|NC_006088.3 | GGA1	88.67	353	26	5	6	357	556351	556690	1e-123	446	5	S
NorthernBobwhite_ScaffoldedDeNovo_contig_20272	gi|358485511|ref|NC_006088.3 | GGA1	80.28	355	44	3	1	335	562260	561912	8e-90	334	2903	M
NorthernBobwhite_ScaffoldedDeNovo_contig_49641	gi|358485511|ref|NC_006088.3 | GGA1	78.98	723	72	19	1	689	569549	570225	4e-171	605	768	M
NorthernBobwhite_ScaffoldedDeNovo_contig_30481	gi|358485511|ref|NC_006088.3 | GGA1	90.91	33	2	1	901	933	573107	573138	0.22	42.8	7	M
NorthernBobwhite_ScaffoldedDeNovo_contig_129695	gi|358485511|ref|NC_006088.3 | GGA1	87.46	558	43	8	170	715	573135	572593	0	679	16	M
NorthernBobwhite_ScaffoldedDeNovo_contig_75454	gi|358485511|ref|NC_006088.3 | GGA1	82.11	408	52	5	273	667	574535	574136	6e-110	403	144	M
NorthernBobwhite_ScaffoldedDeNovo_contig_43786	gi|358485511|ref|NC_006088.3 | GGA1	78.06	2206	302	29	23	2087	577884	575720	0	1829	1310	M
NorthernBobwhite_ScaffoldedDeNovo_contig_98397	gi|358485511|ref|NC_006088.3 | GGA1	74.03	593	80	14	1030	1552	578636	578048	6e-103	379	4	S
NorthernBobwhite_ScaffoldedDeNovo_contig_55035	gi|358485511|ref|NC_006088.3 | GGA1	77.6	1107	139	18	1611	2656	585224	584166	0	895	16	M
NorthernBobwhite_ScaffoldedDeNovo_contig_55034	gi|358485511|ref|NC_006088.3 | GGA1	73.61	451	74	10	249	669	587646	588081	4e-71	273	75	M
NorthernBobwhite_ScaffoldedDeNovo_contig_59976	gi|358485511|ref|NC_006088.3 | GGA1	70.46	887	109	25	337	1080	588999	589875	1e-122	444	1	S
NorthernBobwhite_ScaffoldedDeNovo_contig_36204	gi|358485511|ref|NC_006088.3 | GGA1	77.72	1140	139	18	307	1374	591164	590068	0	933	436	M
NorthernBobwhite_ScaffoldedDeNovo_contig_92419	gi|358485511|ref|NC_006088.3 | GGA1	84.62	39	6	0	163	201	597380	597418	0.016	44.6	9	M
NorthernBobwhite_ScaffoldedDeNovo_contig_170496	gi|358485511|ref|NC_006088.3 | GGA1	70.57	1094	184	31	95	1089	597614	596560	5e-141	506	1	S
NorthernBobwhite_ScaffoldedDeNovo_contig_187171	gi|358485511|ref|NC_006088.3 | GGA1	90.62	128	11	1	308	434	600648	600521	2e-41	174	1	S
NorthernBobwhite_ScaffoldedDeNovo_contig_27713	gi|358485511|ref|NC_006088.3 | GGA1	77.65	1937	181	34	11934	13704	605996	604146	0	1615	66	M
NorthernBobwhite_ScaffoldedDeNovo_contig_59033	gi|358485511|ref|NC_006088.3 | GGA1	80.52	267	24	5	306	545	606210	606475	3e-64	250	2	S
NorthernBobwhite_ScaffoldedDeNovo_contig_102125	gi|358485511|ref|NC_006088.3 | GGA1	77.3	141	19	5	187	320	608628	608762	2e-19	100	72	M
NorthernBobwhite_ScaffoldedDeNovo_contig_180840	gi|358485511|ref|NC_006088.3 | GGA1	90.62	32	2	1	91	122	610157	610127	0.15	41	22	M
NorthernBobwhite_ScaffoldedDeNovo_contig_99595	gi|358485511|ref|NC_006088.3 | GGA1	84.54	207	29	2	105	310	618227	618023	2e-56	223	1	S
NorthernBobwhite_ScaffoldedDeNovo_contig_89866	gi|358485511|ref|NC_006088.3 | GGA1	86.77	499	66	0	1	499	618990	618492	1e-170	603	1	S
NorthernBobwhite_ScaffoldedDeNovo_contig_123018	gi|358485511|ref|NC_006088.3 | GGA1	72.79	1349	261	28	21	1332	622318	623597	0	747	15	S
NorthernBobwhite_ScaffoldedDeNovo_contig_105825	gi|358485511|ref|NC_006088.3 | GGA1	74.61	453	49	6	5	393	626408	625958	1e-88	331	1	S
NorthernBobwhite_ScaffoldedDeNovo_contig_99812	gi|358485511|ref|NC_006088.3 | GGA1	72.38	315	44	17	1	300	627989	628275	7e-31	138	6	S
NorthernBobwhite_ScaffoldedDeNovo_contig_106886	gi|358485511|ref|NC_006088.3 | GGA1	89.47	323	27	3	1	318	628015	627695	2e-116	423	2	S
NorthernBobwhite_ScaffoldedDeNovo_contig_84007	gi|358485511|ref|NC_006088.3 | GGA1	69.51	223	42	15	77	286	629227	629436	0.0001	51.8	68	M
NorthernBobwhite_ScaffoldedDeNovo_contig_45968	gi|358485511|ref|NC_006088.3 | GGA1	69.61	181	29	12	59	232	629239	629400	0.002	48.2	61	M
NorthernBobwhite_ScaffoldedDeNovo_contig_118011	gi|358485511|ref|NC_006088.3 | GGA1	81.33	466	63	11	1	461	630240	629794	1e-115	421	2	S
NorthernBobwhite_ScaffoldedDeNovo_contig_111771	gi|358485511|ref|NC_006088.3 | GGA1	83.91	261	27	3	309	565	631450	631201	5e-74	282	1	S
NorthernBobwhite_ScaffoldedDeNovo_contig_111412	gi|358485511|ref|NC_006088.3 | GGA1	66.58	407	58	23	12	411	631600	631935	2e-15	87.8	19	M
NorthernBobwhite_ScaffoldedDeNovo_contig_53179	gi|358485511|ref|NC_006088.3 | GGA1	67.48	206	44	4	270	470	631745	631558	6e-11	73.4	79	M
NorthernBobwhite_ScaffoldedDeNovo_contig_89241	gi|358485511|ref|NC_006088.3 | GGA1	69.65	425	82	14	3	398	631915	631509	6e-39	165	3	S
NorthernBobwhite_ScaffoldedDeNovo_contig_168250	gi|358485511|ref|NC_006088.3 | GGA1	75.36	414	68	8	1	389	632882	632478	4e-74	282	1	S
NorthernBobwhite_ScaffoldedDeNovo_contig_133622	gi|358485511|ref|NC_006088.3 | GGA1	72.32	383	67	11	22	391	633213	632857	3e-49	199	1	S
NorthernBobwhite_ScaffoldedDeNovo_contig_177471	gi|358485511|ref|NC_006088.3 | GGA1	77.62	478	52	5	1	477	633596	634019	1e-111	407	1	S
NorthernBobwhite_ScaffoldedDeNovo_contig_187588	gi|358485511|ref|NC_006088.3 | GGA1	90.62	32	3	0	1148	1179	637722	637691	0.068	44.6	15	M
NorthernBobwhite_ScaffoldedDeNovo_contig_16843	gi|358485511|ref|NC_006088.3 | GGA1	75.89	2115	261	34	13524	15440	639456	637393	0	1586	27	M
NorthernBobwhite_ScaffoldedDeNovo_contig_187468	gi|358485511|ref|NC_006088.3 | GGA1	80.56	324	40	7	1	305	644801	645120	2e-76	289	1	S
NorthernBobwhite_ScaffoldedDeNovo_contig_21760	gi|358485511|ref|NC_006088.3 | GGA1	71.08	204	27	6	33	207	650732	650932	2e-20	104	1	S
NorthernBobwhite_ScaffoldedDeNovo_contig_199550	gi|358485511|ref|NC_006088.3 | GGA1	86.27	51	5	2	833	882	653483	653532	9e-05	53.6	40	M
NorthernBobwhite_ScaffoldedDeNovo_contig_83818	gi|358485511|ref|NC_006088.3 | GGA1	71.21	448	67	14	2	436	654726	655124	4e-55	219	4	S
NorthernBobwhite_ScaffoldedDeNovo_contig_184976	gi|358485511|ref|NC_006088.3 | GGA1	73.84	344	73	14	64	400	654786	655119	2e-39	167	4	S
NorthernBobwhite_ScaffoldedDeNovo_contig_116164	gi|358485511|ref|NC_006088.3 | GGA1	71.15	416	87	21	26	427	655236	654840	7e-33	145	3	S
NorthernBobwhite_ScaffoldedDeNovo_contig_87323	gi|358485511|ref|NC_006088.3 | GGA1	74.05	370	70	20	2	363	655244	654893	5e-40	168	6	S
NorthernBobwhite_ScaffoldedDeNovo_contig_4727	gi|358485511|ref|NC_006088.3 | GGA1	82.37	2507	224	31	1873	4183	659146	661630	0	2585	6	M
NorthernBobwhite_ScaffoldedDeNovo_contig_176943	gi|358485511|ref|NC_006088.3 | GGA1	73.09	379	101	1	1	378	662618	662996	9e-56	221	156	M
NorthernBobwhite_ScaffoldedDeNovo_contig_141852	gi|358485511|ref|NC_006088.3 | GGA1	75.43	403	87	5	36	433	662639	663034	2e-70	269	203	M
NorthernBobwhite_ScaffoldedDeNovo_contig_142216	gi|358485511|ref|NC_006088.3 | GGA1	82.27	784	109	7	477	1234	667939	668718	0	783	218	M
NorthernBobwhite_ScaffoldedDeNovo_contig_15556	gi|358485511|ref|NC_006088.3 | GGA1	85.37	1887	233	18	2	1869	669055	670917	0	2116	43	M
NorthernBobwhite_ScaffoldedDeNovo_contig_66607	gi|358485511|ref|NC_006088.3 | GGA1	79.89	189	31	3	3	188	674296	674480	2e-38	163	2	S
NorthernBobwhite_ScaffoldedDeNovo_contig_74807	gi|358485511|ref|NC_006088.3 | GGA1	82.58	574	86	6	1	570	675199	675762	7e-161	571	1	S
NorthernBobwhite_ScaffoldedDeNovo_contig_39552	gi|358485511|ref|NC_006088.3 | GGA1	76.14	528	94	9	374	895	676050	676551	6e-101	372	2	S
NorthernBobwhite_ScaffoldedDeNovo_contig_86968	gi|358485511|ref|NC_006088.3 | GGA1	80.58	206	37	1	4	206	676496	676701	1e-46	190	6	S
NorthernBobwhite_ScaffoldedDeNovo_contig_86969	gi|358485511|ref|NC_006088.3 | GGA1	80.1	206	38	1	4	206	676496	676701	5e-45	185	6	S
NorthernBobwhite_ScaffoldedDeNovo_contig_128799	gi|358485511|ref|NC_006088.3 | GGA1	86.5	326	35	3	1	317	676770	677095	3e-105	385	1	S
NorthernBobwhite_ScaffoldedDeNovo_contig_163367	gi|358485511|ref|NC_006088.3 | GGA1	82.5	577	73	5	1	568	680808	681365	2e-166	589	37	M
NorthernBobwhite_ScaffoldedDeNovo_contig_123410	gi|358485511|ref|NC_006088.3 | GGA1	80.76	868	115	11	13	844	694669	695520	0	810	1	S
NorthernBobwhite_ScaffoldedDeNovo_contig_42369	gi|358485511|ref|NC_006088.3 | GGA1	84.93	491	54	2	568	1058	696518	696988	7e-158	562	7	M
NorthernBobwhite_ScaffoldedDeNovo_contig_29748	gi|358485511|ref|NC_006088.3 | GGA1	78.96	808	109	9	2276	3033	698511	697715	0	706	4	S
NorthernBobwhite_ScaffoldedDeNovo_contig_18741	gi|358485511|ref|NC_006088.3 | GGA1	83.26	3458	373	33	23484	26769	702889	706312	0	3663	3413	M
NorthernBobwhite_ScaffoldedDeNovo_contig_74404	gi|358485511|ref|NC_006088.3 | GGA1	78.01	391	56	7	38	423	704849	705214	2e-83	313	1449	M
NorthernBobwhite_ScaffoldedDeNovo_contig_76623	gi|358485511|ref|NC_006088.3 | GGA1	79.3	285	45	7	423	700	704991	705268	3e-58	230	1354	M
NorthernBobwhite_ScaffoldedDeNovo_contig_90037	gi|358485511|ref|NC_006088.3 | GGA1	84.31	835	81	16	159	962	709579	708764	0	888	1	S
NorthernBobwhite_ScaffoldedDeNovo_contig_135184	gi|358485511|ref|NC_006088.3 | GGA1	77.45	306	30	6	2507	2793	710074	710359	1e-63	250	6	S
NorthernBobwhite_ScaffoldedDeNovo_contig_39478	gi|358485511|ref|NC_006088.3 | GGA1	84.76	1595	163	11	2385	3969	714953	713429	0	1804	8	M
NorthernBobwhite_ScaffoldedDeNovo_contig_39477	gi|358485511|ref|NC_006088.3 | GGA1	85.68	810	92	11	1	802	715028	715821	0	910	1	S
NorthernBobwhite_ScaffoldedDeNovo_contig_207672	gi|358485511|ref|NC_006088.3 | GGA1	89.57	326	25	2	1	317	717804	718129	6e-120	434	2	M
NorthernBobwhite_ScaffoldedDeNovo_contig_166721	gi|358485511|ref|NC_006088.3 | GGA1	88.04	326	30	2	1	317	718129	717804	2e-113	412	2	M
NorthernBobwhite_ScaffoldedDeNovo_contig_136818	gi|358485511|ref|NC_006088.3 | GGA1	69.44	216	41	12	2888	3096	721097	720900	2e-06	60.8	21	M
NorthernBobwhite_ScaffoldedDeNovo_contig_13466	gi|358485511|ref|NC_006088.3 | GGA1	82.75	8510	990	93	10693	18876	729288	720931	0	8740	19	M
NorthernBobwhite_ScaffoldedDeNovo_contig_140627	gi|358485511|ref|NC_006088.3 | GGA1	79.95	379	51	8	1	365	742561	742928	8e-88	327	1	S
NorthernBobwhite_ScaffoldedDeNovo_contig_109984	gi|358485511|ref|NC_006088.3 | GGA1	78.99	395	59	6	3	376	742907	743298	3e-89	333	954	M
NorthernBobwhite_ScaffoldedDeNovo_contig_127304	gi|358485511|ref|NC_006088.3 | GGA1	79.16	403	47	8	158	534	743298	742907	4e-93	345	1035	M
NorthernBobwhite_ScaffoldedDeNovo_contig_123434	gi|358485511|ref|NC_006088.3 | GGA1	80.28	71	8	1	5171	5235	744448	744378	7e-08	66.2	18	M
NorthernBobwhite_ScaffoldedDeNovo_contig_152658	gi|358485511|ref|NC_006088.3 | GGA1	80.57	211	15	4	24	208	744588	744378	8e-50	201	1	S
NorthernBobwhite_ScaffoldedDeNovo_contig_176121	gi|358485511|ref|NC_006088.3 | GGA1	100	22	0	0	805	826	745833	745854	0.5	41	8	M
NorthernBobwhite_ScaffoldedDeNovo_contig_104454	gi|358485511|ref|NC_006088.3 | GGA1	65.93	857	138	33	1	728	745979	745148	6e-55	219	1	S
NorthernBobwhite_ScaffoldedDeNovo_contig_182153	gi|358485511|ref|NC_006088.3 | GGA1	76.76	611	104	7	1	585	746154	746752	8e-129	464	3	S
NorthernBobwhite_ScaffoldedDeNovo_contig_132826	gi|358485511|ref|NC_006088.3 | GGA1	72.39	297	64	5	10	297	746699	746412	2e-37	159	3	S
NorthernBobwhite_ScaffoldedDeNovo_contig_169069	gi|358485511|ref|NC_006088.3 | GGA1	86.11	36	3	1	337	370	754034	753999	0.24	41	20	M
NorthernBobwhite_ScaffoldedDeNovo_contig_27869	gi|358485511|ref|NC_006088.3 | GGA1	92.25	413	31	1	84	495	767378	767790	6e-169	598	83	M
NorthernBobwhite_ScaffoldedDeNovo_contig_4932	gi|358485511|ref|NC_006088.3 | GGA1	86.53	8100	728	77	28348	36247	775883	783819	0	9669	1330	M
NorthernBobwhite_ScaffoldedDeNovo_contig_119319	gi|358485511|ref|NC_006088.3 | GGA1	87.18	39	4	1	167	204	779744	779706	0.02	44.6	28	M
NorthernBobwhite_ScaffoldedDeNovo_contig_160174	gi|358485511|ref|NC_006088.3 | GGA1	88.95	362	36	2	20	381	784053	784410	4e-130	468	1	S
NorthernBobwhite_ScaffoldedDeNovo_contig_162706	gi|358485511|ref|NC_006088.3 | GGA1	72.8	364	56	9	5293	5628	790350	790002	9e-51	208	2	S
NorthernBobwhite_ScaffoldedDeNovo_contig_47360	gi|358485511|ref|NC_006088.3 | GGA1	75.68	148	26	3	5	150	791145	791284	5e-18	100	84	M
NorthernBobwhite_ScaffoldedDeNovo_contig_128224	gi|358485511|ref|NC_006088.3 | GGA1	82.27	344	30	5	1	330	792129	791803	6e-95	351	1	S
NorthernBobwhite_ScaffoldedDeNovo_contig_66669	gi|358485511|ref|NC_006088.3 | GGA1	88.68	486	41	4	14	496	792434	792908	1e-176	623	1	S
NorthernBobwhite_ScaffoldedDeNovo_contig_93905	gi|358485511|ref|NC_006088.3 | GGA1	80.57	453	55	5	1	422	793439	792989	4e-118	428	1	S
NorthernBobwhite_ScaffoldedDeNovo_contig_75195	gi|358485511|ref|NC_006088.3 | GGA1	77.57	4601	588	85	393	4703	793710	798156	0	3662	7	M
NorthernBobwhite_ScaffoldedDeNovo_contig_22112	gi|358485511|ref|NC_006088.3 | GGA1	81.46	507	50	11	1	486	806670	807153	8e-134	480	1	S
NorthernBobwhite_ScaffoldedDeNovo_contig_202893	gi|358485511|ref|NC_006088.3 | GGA1	79.94	309	39	6	2	310	806955	806670	4e-71	271	1	S
NorthernBobwhite_ScaffoldedDeNovo_contig_117523	gi|358485511|ref|NC_006088.3 | GGA1	97.76	313	7	0	4	316	807154	807466	9e-150	533	1	S
NorthernBobwhite_ScaffoldedDeNovo_contig_79018	gi|358485511|ref|NC_006088.3 | GGA1	90	30	3	0	324	353	808469	808440	0.17	41	17	M
NorthernBobwhite_ScaffoldedDeNovo_contig_110581	gi|358485511|ref|NC_006088.3 | GGA1	83.93	392	52	5	9	397	818554	818937	9e-113	410	1	S
NorthernBobwhite_ScaffoldedDeNovo_contig_110582	gi|358485511|ref|NC_006088.3 | GGA1	84.95	392	48	5	9	397	818554	818937	3e-118	428	1	S
NorthernBobwhite_ScaffoldedDeNovo_contig_201909	gi|358485511|ref|NC_006088.3 | GGA1	88.74	373	36	3	1	373	819156	819522	3e-132	475	1	S
NorthernBobwhite_ScaffoldedDeNovo_contig_125176	gi|358485511|ref|NC_006088.3 | GGA1	89.3	374	33	2	8	381	819522	819156	3e-137	491	1	S
NorthernBobwhite_ScaffoldedDeNovo_contig_20883	gi|358485511|ref|NC_006088.3 | GGA1	84.34	7714	796	81	19349	26755	827113	819505	0	8471	6059	M
NorthernBobwhite_ScaffoldedDeNovo_contig_118248	gi|358485511|ref|NC_006088.3 | GGA1	78.65	89	13	3	25	108	847908	847995	2e-09	68	172	M
NorthernBobwhite_ScaffoldedDeNovo_contig_122753	gi|358485511|ref|NC_006088.3 | GGA1	78.18	55	11	1	497	550	849083	849137	0.073	42.8	17	M
NorthernBobwhite_ScaffoldedDeNovo_contig_33939	gi|358485511|ref|NC_006088.3 | GGA1	85.31	7282	736	74	1735	8802	856626	849465	0	8276	74	M
NorthernBobwhite_ScaffoldedDeNovo_contig_108835	gi|358485511|ref|NC_006088.3 | GGA1	73.88	601	69	16	2	528	858615	858029	2e-104	383	739	M
NorthernBobwhite_ScaffoldedDeNovo_contig_57794	gi|358485511|ref|NC_006088.3 | GGA1	74.42	430	61	8	1	382	858669	859097	7e-76	288	1	S
NorthernBobwhite_ScaffoldedDeNovo_contig_28650	gi|358485511|ref|NC_006088.3 | GGA1	75.52	384	57	11	2	379	873517	873165	2e-65	253	1	S
NorthernBobwhite_ScaffoldedDeNovo_contig_130018	gi|358485511|ref|NC_006088.3 | GGA1	85.71	42	6	0	580	621	873721	873762	0.0006	50	111	M
NorthernBobwhite_ScaffoldedDeNovo_contig_106205	gi|358485511|ref|NC_006088.3 | GGA1	77.08	349	49	7	3	324	874855	874511	2e-69	266	1	S
NorthernBobwhite_ScaffoldedDeNovo_contig_130324	gi|358485511|ref|NC_006088.3 | GGA1	93.27	416	27	1	7	422	877776	878190	3e-176	621	1	S
NorthernBobwhite_ScaffoldedDeNovo_contig_56512	gi|358485511|ref|NC_006088.3 | GGA1	83.43	863	104	10	117	942	888033	887173	0	902	1	S
NorthernBobwhite_ScaffoldedDeNovo_contig_120550	gi|358485511|ref|NC_006088.3 | GGA1	82.93	41	5	1	199	239	896374	896412	0.18	41	32	M
NorthernBobwhite_ScaffoldedDeNovo_contig_203113	gi|358485511|ref|NC_006088.3 | GGA1	75.74	272	44	6	80	346	897903	897649	2e-45	187	2	S
NorthernBobwhite_ScaffoldedDeNovo_contig_102047	gi|358485511|ref|NC_006088.3 | GGA1	79.15	283	44	6	14	285	898377	898099	4e-59	232	1115	M
NorthernBobwhite_ScaffoldedDeNovo_contig_102046	gi|358485511|ref|NC_006088.3 | GGA1	79.51	283	44	5	14	286	898377	898099	3e-61	239	1222	M
NorthernBobwhite_ScaffoldedDeNovo_contig_3032	gi|358485511|ref|NC_006088.3 | GGA1	84.03	3269	373	37	38228	41391	899320	902544	0	3510	12204	M
NorthernBobwhite_ScaffoldedDeNovo_contig_200498	gi|358485511|ref|NC_006088.3 | GGA1	82.63	714	92	16	25	721	930302	929604	0	686	1	S
NorthernBobwhite_ScaffoldedDeNovo_contig_15371	gi|358485511|ref|NC_006088.3 | GGA1	69.65	491	74	15	15	438	930811	930329	2e-53	214	1	S
NorthernBobwhite_ScaffoldedDeNovo_contig_60171	gi|358485511|ref|NC_006088.3 | GGA1	89.28	569	49	5	5	564	930902	931467	0	740	1	S
NorthernBobwhite_ScaffoldedDeNovo_contig_121026	gi|358485511|ref|NC_006088.3 | GGA1	83.66	563	61	7	1	553	931587	932128	5e-169	598	10	S
NorthernBobwhite_ScaffoldedDeNovo_contig_35992	gi|358485511|ref|NC_006088.3 | GGA1	87.03	4311	415	44	11388	15633	937519	933288	0	5185	513	M
NorthernBobwhite_ScaffoldedDeNovo_contig_48238	gi|358485511|ref|NC_006088.3 | GGA1	71.33	143	35	3	12342	12481	941835	941974	4e-07	66.2	241	M
NorthernBobwhite_ScaffoldedDeNovo_contig_117385	gi|358485511|ref|NC_006088.3 | GGA1	82.54	315	42	4	1	308	950696	951004	4e-84	315	1	S
NorthernBobwhite_ScaffoldedDeNovo_contig_172870	gi|358485511|ref|NC_006088.3 | GGA1	81.99	311	44	4	1	301	950696	951004	3e-80	302	1	S
NorthernBobwhite_ScaffoldedDeNovo_contig_73673	gi|358485511|ref|NC_006088.3 | GGA1	83.14	421	50	2	4	403	950718	950298	1e-124	450	1	S
NorthernBobwhite_ScaffoldedDeNovo_contig_142402	gi|358485511|ref|NC_006088.3 | GGA1	76.22	328	40	8	61	378	952740	952441	3e-61	239	1	S
NorthernBobwhite_ScaffoldedDeNovo_contig_166214	gi|358485511|ref|NC_006088.3 | GGA1	83.97	312	47	2	1	309	953020	953331	5e-89	331	8835	M
NorthernBobwhite_ScaffoldedDeNovo_contig_37692	gi|358485511|ref|NC_006088.3 | GGA1	83.4	771	94	14	2422	3184	955497	954753	0	782	14	M
NorthernBobwhite_ScaffoldedDeNovo_contig_102218	gi|358485511|ref|NC_006088.3 | GGA1	83.54	328	44	6	384	707	955830	956151	1e-88	331	2	S
NorthernBobwhite_ScaffoldedDeNovo_contig_81988	gi|358485511|ref|NC_006088.3 | GGA1	96.15	26	1	0	10	35	961411	961386	0.064	42.8	82	M
NorthernBobwhite_ScaffoldedDeNovo_contig_181910	gi|358485511|ref|NC_006088.3 | GGA1	86.05	43	5	1	5509	5551	961883	961842	0.019	48.2	77	M
NorthernBobwhite_ScaffoldedDeNovo_contig_27961	gi|358485511|ref|NC_006088.3 | GGA1	80.12	6891	894	96	16334	22868	966220	972990	0	6248	1631	M
NorthernBobwhite_ScaffoldedDeNovo_contig_103142	gi|358485511|ref|NC_006088.3 | GGA1	87.22	180	23	0	323	502	986523	986702	1e-55	221	2	S
NorthernBobwhite_ScaffoldedDeNovo_contig_72823	gi|358485511|ref|NC_006088.3 | GGA1	86.1	633	85	1	518	1147	994108	993476	0	744	2	S
NorthernBobwhite_ScaffoldedDeNovo_contig_46342	gi|358485511|ref|NC_006088.3 | GGA1	70.01	697	138	16	293	940	995470	994796	2e-81	307	1	S
NorthernBobwhite_ScaffoldedDeNovo_contig_143474	gi|358485511|ref|NC_006088.3 | GGA1	86.15	563	62	6	1	556	996263	995710	0	652	1	S
NorthernBobwhite_ScaffoldedDeNovo_contig_77255	gi|358485511|ref|NC_006088.3 | GGA1	75.06	453	71	6	1	413	996989	996539	5e-85	318	10266	M
NorthernBobwhite_ScaffoldedDeNovo_contig_79604	gi|358485511|ref|NC_006088.3 | GGA1	81.87	1677	191	20	2733	4338	999863	998229	0	1665	22727	M
NorthernBobwhite_ScaffoldedDeNovo_contig_80566	gi|358485511|ref|NC_006088.3 | GGA1	88.09	470	44	7	1	461	1003130	1002664	4e-162	574	1	S
NorthernBobwhite_ScaffoldedDeNovo_contig_131747	gi|358485511|ref|NC_006088.3 | GGA1	85.38	383	39	3	122	497	1003240	1003612	7e-122	441	124	M
NorthernBobwhite_ScaffoldedDeNovo_contig_112804	gi|358485511|ref|NC_006088.3 | GGA1	73.89	452	80	7	62	502	1014765	1014341	3e-75	286	1	S
NorthernBobwhite_ScaffoldedDeNovo_contig_197613	gi|358485511|ref|NC_006088.3 | GGA1	70.6	381	53	8	70	392	1019227	1019606	3e-49	199	1	S
NorthernBobwhite_ScaffoldedDeNovo_contig_186502	gi|358485511|ref|NC_006088.3 | GGA1	70.08	381	48	10	1	316	1019606	1019227	5e-46	188	1	S
NorthernBobwhite_ScaffoldedDeNovo_contig_8776	gi|358485511|ref|NC_006088.3 | GGA1	81.25	5260	592	46	31710	36676	1035977	1030819	0	5189	19015	M
NorthernBobwhite_ScaffoldedDeNovo_contig_99832	gi|358485511|ref|NC_006088.3 | GGA1	77.96	1175	156	17	1	1102	1057003	1058147	0	967	1	S
NorthernBobwhite_ScaffoldedDeNovo_contig_177094	gi|358485511|ref|NC_006088.3 | GGA1	73.49	464	88	6	7	470	1060208	1060636	9e-76	288	14	S
NorthernBobwhite_ScaffoldedDeNovo_contig_54829	gi|358485511|ref|NC_006088.3 | GGA1	82.67	404	52	5	1	400	1062144	1062533	1e-111	407	1	S
NorthernBobwhite_ScaffoldedDeNovo_contig_54828	gi|358485511|ref|NC_006088.3 | GGA1	81.76	466	66	5	12	471	1062596	1062144	4e-125	452	1	S
NorthernBobwhite_ScaffoldedDeNovo_contig_164326	gi|358485511|ref|NC_006088.3 | GGA1	85.75	449	50	4	3	446	1065053	1065492	3e-144	517	2	S
NorthernBobwhite_ScaffoldedDeNovo_contig_111985	gi|358485511|ref|NC_006088.3 | GGA1	74.17	333	50	6	168	469	1065493	1065820	4e-55	219	1	S
NorthernBobwhite_ScaffoldedDeNovo_contig_165549	gi|358485511|ref|NC_006088.3 | GGA1	73.21	280	61	6	1	278	1067849	1067582	4e-35	152	3	S
NorthernBobwhite_ScaffoldedDeNovo_contig_59640	gi|358485511|ref|NC_006088.3 | GGA1	70.32	401	92	15	15	407	1068041	1067660	2e-32	143	5	S
NorthernBobwhite_ScaffoldedDeNovo_contig_100757	gi|358485511|ref|NC_006088.3 | GGA1	76.35	427	53	6	1	393	1074311	1073899	7e-89	331	1	S
NorthernBobwhite_ScaffoldedDeNovo_contig_16561	gi|358485511|ref|NC_006088.3 | GGA1	73.41	267	71	0	7586	7852	1084979	1084713	7e-36	161	1	S
NorthernBobwhite_ScaffoldedDeNovo_contig_5711	gi|358485511|ref|NC_006088.3 | GGA1	77.15	337	44	8	13	332	1085410	1085730	7e-66	255	2	S
NorthernBobwhite_ScaffoldedDeNovo_contig_74333	gi|358485511|ref|NC_006088.3 | GGA1	69.98	663	85	13	13	587	1085410	1086046	2e-92	343	16	M
NorthernBobwhite_ScaffoldedDeNovo_contig_5712	gi|358485511|ref|NC_006088.3 | GGA1	86.38	5455	508	44	2492	7740	1097287	1091862	0	6502	8648	M
NorthernBobwhite_ScaffoldedDeNovo_contig_66316	gi|358485511|ref|NC_006088.3 | GGA1	76.25	80	14	2	482	559	1099531	1099607	1e-05	55.4	77	M
NorthernBobwhite_ScaffoldedDeNovo_contig_107617	gi|358485511|ref|NC_006088.3 | GGA1	84.75	59	7	2	532	590	1099605	1099549	2e-06	59	131	M
NorthernBobwhite_ScaffoldedDeNovo_contig_118615	gi|358485511|ref|NC_006088.3 | GGA1	81.19	1366	156	18	1	1284	1100795	1102141	0	1315	461	M
NorthernBobwhite_ScaffoldedDeNovo_contig_40005	gi|358485511|ref|NC_006088.3 | GGA1	92.31	26	2	0	324	349	1115526	1115501	0.57	39.2	9	M
NorthernBobwhite_ScaffoldedDeNovo_contig_29719	gi|358485511|ref|NC_006088.3 | GGA1	86.11	7273	685	68	11708	18801	1126765	1119639	0	8549	16022	M
NorthernBobwhite_ScaffoldedDeNovo_contig_133021	gi|358485511|ref|NC_006088.3 | GGA1	85.66	760	66	7	224	954	1126852	1127597	0	886	1	S
NorthernBobwhite_ScaffoldedDeNovo_contig_4729	gi|358485511|ref|NC_006088.3 | GGA1	85.9	5511	567	49	4917	10344	1142442	1147825	0	6405	264	M
NorthernBobwhite_ScaffoldedDeNovo_contig_46185	gi|358485511|ref|NC_006088.3 | GGA1	85.26	889	109	10	10	890	1150429	1149555	0	987	1	S
NorthernBobwhite_ScaffoldedDeNovo_contig_90633	gi|358485511|ref|NC_006088.3 | GGA1	86.07	359	43	2	4	362	1151525	1151174	2e-115	419	1	S
NorthernBobwhite_ScaffoldedDeNovo_contig_146443	gi|358485511|ref|NC_006088.3 | GGA1	97.25	363	9	1	1	363	1151754	1152115	6e-172	607	1	S
NorthernBobwhite_ScaffoldedDeNovo_contig_195316	gi|358485511|ref|NC_006088.3 | GGA1	88.66	238	17	2	1	229	1152815	1153051	1e-81	307	2	S
NorthernBobwhite_ScaffoldedDeNovo_contig_55768	gi|358485511|ref|NC_006088.3 | GGA1	96.95	328	10	0	1	328	1154665	1154338	5e-154	547	10	M
NorthernBobwhite_ScaffoldedDeNovo_contig_100093	gi|358485511|ref|NC_006088.3 | GGA1	96.82	440	14	0	1	440	1154790	1155229	0	731	18	M
NorthernBobwhite_ScaffoldedDeNovo_contig_13713	gi|358485511|ref|NC_006088.3 | GGA1	81.6	3973	532	37	1	3871	1164076	1160201	0	3882	10	M
NorthernBobwhite_ScaffoldedDeNovo_contig_144387	gi|358485511|ref|NC_006088.3 | GGA1	85.57	714	70	5	1	682	1164152	1164864	0	830	1	S
NorthernBobwhite_ScaffoldedDeNovo_contig_130305	gi|358485511|ref|NC_006088.3 | GGA1	82	411	62	5	1	401	1165019	1165427	2e-108	396	1865	M
NorthernBobwhite_ScaffoldedDeNovo_contig_5266	gi|358485511|ref|NC_006088.3 | GGA1	84.41	4202	478	31	5759	9829	1171142	1175297	0	4644	2072	M
NorthernBobwhite_ScaffoldedDeNovo_contig_138095	gi|358485511|ref|NC_006088.3 | GGA1	81.27	411	71	3	2	408	1171166	1170758	1e-105	387	1	S
NorthernBobwhite_ScaffoldedDeNovo_contig_138094	gi|358485511|ref|NC_006088.3 | GGA1	78.1	411	73	4	2	397	1171166	1170758	2e-89	333	1	S
NorthernBobwhite_ScaffoldedDeNovo_contig_93679	gi|358485511|ref|NC_006088.3 | GGA1	88.24	34	4	0	1677	1710	1173942	1173975	0.13	44.6	10	M
NorthernBobwhite_ScaffoldedDeNovo_contig_23278	gi|358485511|ref|NC_006088.3 | GGA1	80.59	1597	182	18	1	1486	1178342	1179921	0	1517	1	S
NorthernBobwhite_ScaffoldedDeNovo_contig_43667	gi|358485511|ref|NC_006088.3 | GGA1	87.33	3291	347	23	11	3250	1179925	1183196	0	4015	16649	M
NorthernBobwhite_ScaffoldedDeNovo_contig_204554	gi|358485511|ref|NC_006088.3 | GGA1	74.02	408	41	8	1	389	1188612	1188973	1e-73	280	4765	M
NorthernBobwhite_ScaffoldedDeNovo_contig_175345	gi|358485511|ref|NC_006088.3 | GGA1	74.15	410	41	8	1	391	1188975	1188612	9e-75	284	4268	M
NorthernBobwhite_ScaffoldedDeNovo_contig_210132	gi|358485511|ref|NC_006088.3 | GGA1	79.06	339	37	4	1	305	1191825	1192163	7e-81	304	1	S
NorthernBobwhite_ScaffoldedDeNovo_contig_85526	gi|358485511|ref|NC_006088.3 | GGA1	85.84	1017	106	7	3	1005	1191848	1190856	0	1187	1	S
NorthernBobwhite_ScaffoldedDeNovo_contig_94484	gi|358485511|ref|NC_006088.3 | GGA1	84.54	485	53	3	1	463	1192309	1191825	7e-153	544	1	S
NorthernBobwhite_ScaffoldedDeNovo_contig_73085	gi|358485511|ref|NC_006088.3 | GGA1	85.95	2577	289	15	1	2523	1193265	1195822	0	3014	2450	M
NorthernBobwhite_ScaffoldedDeNovo_contig_204892	gi|358485511|ref|NC_006088.3 | GGA1	78.66	314	36	6	1	310	1196661	1196947	2e-69	266	315	M
NorthernBobwhite_ScaffoldedDeNovo_contig_32255	gi|358485511|ref|NC_006088.3 | GGA1	80.57	314	30	6	1	310	1196661	1196947	1e-77	293	430	M
NorthernBobwhite_ScaffoldedDeNovo_contig_136714	gi|358485511|ref|NC_006088.3 | GGA1	81.74	597	82	6	3	579	1197219	1197808	1e-164	583	10685	M
NorthernBobwhite_ScaffoldedDeNovo_contig_58556	gi|358485511|ref|NC_006088.3 | GGA1	79.64	447	81	4	1	442	1197884	1198325	1e-105	387	1	S
NorthernBobwhite_ScaffoldedDeNovo_contig_58555	gi|358485511|ref|NC_006088.3 | GGA1	81.77	532	60	5	2	507	1198841	1198321	1e-149	533	1	S
NorthernBobwhite_ScaffoldedDeNovo_contig_88440	gi|358485511|ref|NC_006088.3 | GGA1	84.74	1343	139	8	1	1297	1200181	1198859	0	1521	1147	M
NorthernBobwhite_ScaffoldedDeNovo_contig_3345	gi|358485511|ref|NC_006088.3 | GGA1	84.53	7486	876	64	3509	10806	1203432	1210823	0	8246	20707	M
NorthernBobwhite_ScaffoldedDeNovo_contig_111306	gi|358485511|ref|NC_006088.3 | GGA1	78.83	392	54	6	5	367	1210802	1211193	2e-89	333	1	S
NorthernBobwhite_ScaffoldedDeNovo_contig_147821	gi|358485511|ref|NC_006088.3 | GGA1	79.34	392	52	6	5	367	1210802	1211193	4e-92	342	1	S
NorthernBobwhite_ScaffoldedDeNovo_contig_105872	gi|358485511|ref|NC_006088.3 | GGA1	85.43	652	74	5	12	644	1211190	1211839	0	744	1	S
NorthernBobwhite_ScaffoldedDeNovo_contig_121054	gi|358485511|ref|NC_006088.3 | GGA1	79.64	329	44	6	2	312	1216430	1216107	2e-75	286	1	S
NorthernBobwhite_ScaffoldedDeNovo_contig_42499	gi|358485511|ref|NC_006088.3 | GGA1	84.02	2028	237	16	4901	6870	1224417	1226415	0	2203	585	M
NorthernBobwhite_ScaffoldedDeNovo_contig_43101	gi|358485511|ref|NC_006088.3 | GGA1	83.06	3471	385	37	4884	8236	1232102	1228717	0	3626	14261	M
NorthernBobwhite_ScaffoldedDeNovo_contig_24718	gi|358485511|ref|NC_006088.3 | GGA1	83.52	358	50	3	127	475	1239810	1240167	8e-102	374	1	S
NorthernBobwhite_ScaffoldedDeNovo_contig_127694	gi|358485511|ref|NC_006088.3 | GGA1	84.81	362	51	2	1	358	1240171	1239810	2e-109	399	1	S
NorthernBobwhite_ScaffoldedDeNovo_contig_59335	gi|358485511|ref|NC_006088.3 | GGA1	83.24	525	68	4	1	521	1243074	1243582	6e-155	551	1421	M
NorthernBobwhite_ScaffoldedDeNovo_contig_134501	gi|358485511|ref|NC_006088.3 | GGA1	83.58	615	81	4	1	611	1243672	1243074	0	654	2706	M
NorthernBobwhite_ScaffoldedDeNovo_contig_88002	gi|358485511|ref|NC_006088.3 | GGA1	85.29	435	38	4	1	418	1247947	1248372	4e-140	502	2	S
NorthernBobwhite_ScaffoldedDeNovo_contig_20477	gi|358485511|ref|NC_006088.3 | GGA1	86.7	4007	388	36	15200	19133	1249802	1253736	0	4792	5323	M
NorthernBobwhite_ScaffoldedDeNovo_contig_204272	gi|358485511|ref|NC_006088.3 | GGA1	80.12	322	38	7	2	319	1262554	1262853	9e-75	284	1	S
NorthernBobwhite_ScaffoldedDeNovo_contig_213291	gi|358485511|ref|NC_006088.3 | GGA1	86.73	113	13	2	2	113	1262554	1262665	5e-28	129	1	S
NorthernBobwhite_ScaffoldedDeNovo_contig_99860	gi|358485511|ref|NC_006088.3 | GGA1	77.81	374	70	3	8	368	1263037	1263410	4e-79	298	1029	M
NorthernBobwhite_ScaffoldedDeNovo_contig_119720	gi|358485511|ref|NC_006088.3 | GGA1	77.31	379	70	4	47	414	1263410	1263037	2e-77	293	1202	M
NorthernBobwhite_ScaffoldedDeNovo_contig_36733	gi|358485511|ref|NC_006088.3 | GGA1	83.05	2436	307	29	698	3111	1265986	1263635	0	2502	27728	M
NorthernBobwhite_ScaffoldedDeNovo_contig_36734	gi|358485511|ref|NC_006088.3 | GGA1	80.57	247	35	1	460	706	1266265	1266498	2e-60	237	4056	M
NorthernBobwhite_ScaffoldedDeNovo_contig_46066	gi|358485511|ref|NC_006088.3 | GGA1	78.54	247	40	1	12	258	1266498	1266265	1e-53	214	3	M
NorthernBobwhite_ScaffoldedDeNovo_contig_149957	gi|358485511|ref|NC_006088.3 | GGA1	85.38	342	46	2	1	342	1269707	1270044	9e-106	387	1	S
NorthernBobwhite_ScaffoldedDeNovo_contig_48562	gi|358485511|ref|NC_006088.3 | GGA1	84.62	3876	484	40	3984	7789	1270022	1273855	0	4224	11656	M
NorthernBobwhite_ScaffoldedDeNovo_contig_140287	gi|358485511|ref|NC_006088.3 | GGA1	80.7	342	40	4	2	321	1270044	1269707	2e-87	325	1	S
NorthernBobwhite_ScaffoldedDeNovo_contig_36548	gi|358485511|ref|NC_006088.3 | GGA1	85.51	1284	110	10	176	1402	1290518	1289254	0	1501	773	M
NorthernBobwhite_ScaffoldedDeNovo_contig_17871	gi|358485511|ref|NC_006088.3 | GGA1	78.77	1267	109	22	7862	8981	1301822	1303075	0	1117	8992	M
NorthernBobwhite_ScaffoldedDeNovo_contig_32640	gi|358485511|ref|NC_006088.3 | GGA1	88.03	610	44	8	12	612	1303121	1303710	0	762	1	S
NorthernBobwhite_ScaffoldedDeNovo_contig_14581	gi|358485511|ref|NC_006088.3 | GGA1	74.04	2061	298	45	835	2713	1307226	1305221	0	1315	4	S
NorthernBobwhite_ScaffoldedDeNovo_contig_107938	gi|358485511|ref|NC_006088.3 | GGA1	86.42	729	80	4	1	712	1308916	1309642	0	868	1	S
NorthernBobwhite_ScaffoldedDeNovo_contig_8631	gi|358485511|ref|NC_006088.3 | GGA1	82.49	5751	743	67	1	5591	1310464	1316110	0	5768	53251	M
NorthernBobwhite_ScaffoldedDeNovo_contig_23465	gi|358485511|ref|NC_006088.3 | GGA1	88.24	34	3	1	309	341	1315310	1315343	0.15	41	192	M
NorthernBobwhite_ScaffoldedDeNovo_contig_126151	gi|358485511|ref|NC_006088.3 | GGA1	84.94	591	67	7	2	573	1322951	1323538	0	654	1	S
NorthernBobwhite_ScaffoldedDeNovo_contig_112524	gi|358485511|ref|NC_006088.3 | GGA1	80	255	37	3	113	353	1329164	1328910	2e-58	230	6038	M
NorthernBobwhite_ScaffoldedDeNovo_contig_92150	gi|358485511|ref|NC_006088.3 | GGA1	89.8	3481	287	14	3	3449	1329689	1333135	0	4675	5	S
NorthernBobwhite_ScaffoldedDeNovo_contig_4814	gi|358485511|ref|NC_006088.3 | GGA1	89.36	6063	477	31	2161	8117	1340733	1346733	0	8038	28983	M
NorthernBobwhite_ScaffoldedDeNovo_contig_95515	gi|358485511|ref|NC_006088.3 | GGA1	94.44	36	2	0	6212	6247	1356680	1356645	4e-05	57.2	227	M
NorthernBobwhite_ScaffoldedDeNovo_contig_161464	gi|358485511|ref|NC_006088.3 | GGA1	81.67	540	65	7	3	511	1366027	1365491	6e-148	527	1	S
NorthernBobwhite_ScaffoldedDeNovo_contig_98345	gi|358485511|ref|NC_006088.3 | GGA1	96	25	1	0	315	339	1366101	1366077	0.28	41	6	M
NorthernBobwhite_ScaffoldedDeNovo_contig_24770	gi|358485511|ref|NC_006088.3 | GGA1	85.92	1634	160	17	12618	14214	1385393	1383793	0	1896	28893	M
NorthernBobwhite_ScaffoldedDeNovo_contig_125704	gi|358485511|ref|NC_006088.3 | GGA1	79.8	1005	118	15	1	966	1392829	1391871	0	906	1775	M
NorthernBobwhite_ScaffoldedDeNovo_contig_58059	gi|358485511|ref|NC_006088.3 | GGA1	84.65	4580	524	47	4751	9203	1401728	1406255	0	5039	36022	M
NorthernBobwhite_ScaffoldedDeNovo_contig_182689	gi|358485511|ref|NC_006088.3 | GGA1	82.29	367	53	4	1	358	1409321	1409684	4e-98	361	1208	M
NorthernBobwhite_ScaffoldedDeNovo_contig_188092	gi|358485511|ref|NC_006088.3 | GGA1	80.43	368	59	4	1	359	1409321	1409684	2e-89	333	870	M
NorthernBobwhite_ScaffoldedDeNovo_contig_48044	gi|358485511|ref|NC_006088.3 | GGA1	89.29	878	80	4	4	868	1409343	1408467	0	1155	9508	M
NorthernBobwhite_ScaffoldedDeNovo_contig_16553	gi|358485511|ref|NC_006088.3 | GGA1	82.4	392	52	4	1	379	1420708	1421095	7e-108	394	15	M
NorthernBobwhite_ScaffoldedDeNovo_contig_16552	gi|358485511|ref|NC_006088.3 | GGA1	84.44	392	49	3	1	384	1420708	1421095	1e-118	430	32	M
NorthernBobwhite_ScaffoldedDeNovo_contig_92228	gi|358485511|ref|NC_006088.3 | GGA1	83.5	309	42	4	1	304	1426814	1427118	3e-85	318	1	S
NorthernBobwhite_ScaffoldedDeNovo_contig_67849	gi|358485511|ref|NC_006088.3 | GGA1	85.23	325	33	3	1	325	1426839	1426530	7e-101	370	1	S
NorthernBobwhite_ScaffoldedDeNovo_contig_62682	gi|358485511|ref|NC_006088.3 | GGA1	80.09	447	70	5	159	596	1446151	1445715	3e-109	399	21	M
NorthernBobwhite_ScaffoldedDeNovo_contig_37280	gi|358485511|ref|NC_006088.3 | GGA1	87.09	364	46	1	438	800	1464014	1464377	2e-121	441	3	S
NorthernBobwhite_ScaffoldedDeNovo_contig_24537	gi|358485511|ref|NC_006088.3 | GGA1	88.78	1854	179	11	611	2460	1471741	1469913	0	2383	17994	M
NorthernBobwhite_ScaffoldedDeNovo_contig_29567	gi|358485511|ref|NC_006088.3 | GGA1	89.78	1125	99	7	5	1118	1472932	1474051	0	1494	1	S
NorthernBobwhite_ScaffoldedDeNovo_contig_18322	gi|358485511|ref|NC_006088.3 | GGA1	85.03	3434	400	29	12858	16235	1486626	1490001	0	3847	23310	M
NorthernBobwhite_ScaffoldedDeNovo_contig_30536	gi|358485511|ref|NC_006088.3 | GGA1	84.69	490	62	6	58	545	1489998	1490476	5e-149	531	24	M
NorthernBobwhite_ScaffoldedDeNovo_contig_98706	gi|358485511|ref|NC_006088.3 | GGA1	75.39	386	42	6	27	359	1490837	1490452	2e-76	289	1102	M
NorthernBobwhite_ScaffoldedDeNovo_contig_98707	gi|358485511|ref|NC_006088.3 | GGA1	76.87	441	47	7	15	401	1490897	1490458	6e-96	354	1632	M
NorthernBobwhite_ScaffoldedDeNovo_contig_11406	gi|358485511|ref|NC_006088.3 | GGA1	85.44	721	81	3	556	1256	1491608	1490892	0	836	2	S
NorthernBobwhite_ScaffoldedDeNovo_contig_204443	gi|358485511|ref|NC_006088.3 | GGA1	78.24	363	66	4	7	361	1492329	1492686	2e-77	293	1	S
NorthernBobwhite_ScaffoldedDeNovo_contig_27412	gi|358485511|ref|NC_006088.3 | GGA1	87.82	731	70	4	1	726	1493477	1492761	0	917	1	S
NorthernBobwhite_ScaffoldedDeNovo_contig_62236	gi|358485511|ref|NC_006088.3 | GGA1	84.03	313	44	1	1	307	1493999	1493687	1e-91	340	5	M
NorthernBobwhite_ScaffoldedDeNovo_contig_71480	gi|358485511|ref|NC_006088.3 | GGA1	84.03	313	44	1	1	307	1493999	1493687	1e-91	340	3	M
NorthernBobwhite_ScaffoldedDeNovo_contig_11405	gi|358485511|ref|NC_006088.3 | GGA1	85.45	2921	306	25	2615	5484	1496464	1499316	0	3346	414	M
NorthernBobwhite_ScaffoldedDeNovo_contig_133492	gi|358485511|ref|NC_006088.3 | GGA1	82.92	644	65	8	3	641	1508011	1508614	0	670	1	S
NorthernBobwhite_ScaffoldedDeNovo_contig_34717	gi|358485511|ref|NC_006088.3 | GGA1	82.57	2312	284	24	3336	5567	1513175	1510903	0	2352	12162	M
NorthernBobwhite_ScaffoldedDeNovo_contig_189193	gi|358485511|ref|NC_006088.3 | GGA1	85.07	268	32	4	56	317	1520667	1520932	2e-77	293	14557	M
NorthernBobwhite_ScaffoldedDeNovo_contig_196596	gi|358485511|ref|NC_006088.3 | GGA1	83.83	266	35	4	64	323	1520667	1520930	4e-72	275	11509	M
NorthernBobwhite_ScaffoldedDeNovo_contig_37758	gi|358485511|ref|NC_006088.3 | GGA1	84.01	5198	624	65	5784	10856	1529022	1523907	0	5521	8844	M
NorthernBobwhite_ScaffoldedDeNovo_contig_208886	gi|358485511|ref|NC_006088.3 | GGA1	74.12	340	56	4	7	323	1529337	1529007	5e-58	228	1	S
NorthernBobwhite_ScaffoldedDeNovo_contig_211263	gi|358485511|ref|NC_006088.3 | GGA1	74.41	340	55	4	7	323	1529337	1529007	4e-59	232	1	S
NorthernBobwhite_ScaffoldedDeNovo_contig_174873	gi|358485511|ref|NC_006088.3 | GGA1	80.51	195	29	3	78	269	1534489	1534677	3e-42	176	1	S
NorthernBobwhite_ScaffoldedDeNovo_contig_195518	gi|358485511|ref|NC_006088.3 | GGA1	81.03	195	28	3	78	269	1534489	1534677	2e-43	179	1	S
NorthernBobwhite_ScaffoldedDeNovo_contig_23524	gi|358485511|ref|NC_006088.3 | GGA1	86.44	6216	649	54	2450	8593	1534848	1540941	0	7340	39836	M
NorthernBobwhite_ScaffoldedDeNovo_contig_52174	gi|358485511|ref|NC_006088.3 | GGA1	81.2	399	50	7	1	386	1546431	1546817	2e-101	372	1	S
NorthernBobwhite_ScaffoldedDeNovo_contig_133596	gi|358485511|ref|NC_006088.3 | GGA1	83.33	840	113	9	19	844	1556987	1556161	0	868	1	S
NorthernBobwhite_ScaffoldedDeNovo_contig_36562	gi|358485511|ref|NC_006088.3 | GGA1	86.84	2166	240	17	2	2147	1557572	1559712	0	2585	6327	M
NorthernBobwhite_ScaffoldedDeNovo_contig_115575	gi|358485511|ref|NC_006088.3 | GGA1	85.01	527	61	6	1	520	1560873	1561388	9e-165	583	1	S
NorthernBobwhite_ScaffoldedDeNovo_contig_115574	gi|358485511|ref|NC_006088.3 | GGA1	84.33	536	58	6	1	530	1560873	1561388	3e-165	585	1	S
NorthernBobwhite_ScaffoldedDeNovo_contig_138990	gi|358485511|ref|NC_006088.3 | GGA1	87.51	1305	124	6	8	1282	1562658	1561363	0	1627	1	S
NorthernBobwhite_ScaffoldedDeNovo_contig_82030	gi|358485511|ref|NC_006088.3 | GGA1	91.53	118	9	1	5122	5239	1562844	1562728	9e-38	165	2	S
NorthernBobwhite_ScaffoldedDeNovo_contig_149167	gi|358485511|ref|NC_006088.3 | GGA1	82.31	277	37	3	5	273	1563415	1563143	1e-72	277	1	S
NorthernBobwhite_ScaffoldedDeNovo_contig_61440	gi|358485511|ref|NC_006088.3 | GGA1	81.29	278	39	3	4	273	1563415	1563143	2e-69	266	1	S
NorthernBobwhite_ScaffoldedDeNovo_contig_122401	gi|358485511|ref|NC_006088.3 | GGA1	86.22	254	32	3	1	251	1566312	1566059	2e-76	289	2	S
NorthernBobwhite_ScaffoldedDeNovo_contig_199637	gi|358485511|ref|NC_006088.3 | GGA1	86.61	254	31	3	1	251	1566312	1566059	4e-78	295	2	S
NorthernBobwhite_ScaffoldedDeNovo_contig_101388	gi|358485511|ref|NC_006088.3 | GGA1	83.6	433	52	9	6	424	1569440	1569867	9e-121	437	1	S
NorthernBobwhite_ScaffoldedDeNovo_contig_57848	gi|358485511|ref|NC_006088.3 | GGA1	85.53	3352	358	25	6715	9989	1570561	1573862	0	3860	2868	M
NorthernBobwhite_ScaffoldedDeNovo_contig_70483	gi|358485511|ref|NC_006088.3 | GGA1	90	520	46	2	1	514	1574443	1573924	0	700	1	S
NorthernBobwhite_ScaffoldedDeNovo_contig_24447	gi|358485511|ref|NC_006088.3 | GGA1	90.6	319	27	2	355	670	1575316	1575634	1e-119	434	2	S
NorthernBobwhite_ScaffoldedDeNovo_contig_137664	gi|358485511|ref|NC_006088.3 | GGA1	94.02	585	35	0	2	586	1577333	1577917	0	897	3	S
NorthernBobwhite_ScaffoldedDeNovo_contig_95968	gi|358485511|ref|NC_006088.3 | GGA1	79.81	530	67	9	1	505	1579110	1579624	1e-130	470	1	S
NorthernBobwhite_ScaffoldedDeNovo_contig_110026	gi|358485511|ref|NC_006088.3 | GGA1	93.65	441	28	0	1	441	1580609	1580169	0	670	2	S
NorthernBobwhite_ScaffoldedDeNovo_contig_168475	gi|358485511|ref|NC_006088.3 | GGA1	84.62	156	23	1	1	155	1640378	1640533	1e-40	170	53	M
NorthernBobwhite_ScaffoldedDeNovo_contig_25728	gi|358485511|ref|NC_006088.3 | GGA1	82.35	289	49	1	2	288	1640624	1640336	3e-76	289	120	M
NorthernBobwhite_ScaffoldedDeNovo_contig_54917	gi|358485511|ref|NC_006088.3 | GGA1	69.1	343	80	11	60	383	1641595	1641930	1e-23	114	73	M
NorthernBobwhite_ScaffoldedDeNovo_contig_62665	gi|358485511|ref|NC_006088.3 | GGA1	88.11	530	60	2	2468	2997	1645179	1644653	0	666	3	M
NorthernBobwhite_ScaffoldedDeNovo_contig_161833	gi|358485511|ref|NC_006088.3 | GGA1	90.67	193	14	2	1	190	1645745	1645936	4e-68	262	4	M
NorthernBobwhite_ScaffoldedDeNovo_contig_138375	gi|358485511|ref|NC_006088.3 | GGA1	87.19	203	26	0	215	417	1646891	1646689	2e-64	250	2	S
NorthernBobwhite_ScaffoldedDeNovo_contig_159146	gi|358485511|ref|NC_006088.3 | GGA1	89.89	178	18	0	314	491	1648782	1648959	1e-61	241	2	S
NorthernBobwhite_ScaffoldedDeNovo_contig_83567	gi|358485511|ref|NC_006088.3 | GGA1	78.94	584	79	10	2	556	1649941	1649373	1e-137	493	1	S
NorthernBobwhite_ScaffoldedDeNovo_contig_127610	gi|358485511|ref|NC_006088.3 | GGA1	81.15	1586	178	22	3	1509	1652050	1650507	0	1523	907	M
NorthernBobwhite_ScaffoldedDeNovo_contig_131506	gi|358485511|ref|NC_006088.3 | GGA1	86.47	207	25	2	251	454	1656578	1656372	1e-61	241	4	M
NorthernBobwhite_ScaffoldedDeNovo_contig_196795	gi|358485511|ref|NC_006088.3 | GGA1	86.47	207	25	2	161	364	1656578	1656372	9e-62	241	2	S
NorthernBobwhite_ScaffoldedDeNovo_contig_67071	gi|358485511|ref|NC_006088.3 | GGA1	84.77	4387	465	45	4349	8608	1670684	1666374	0	4893	20100	M
NorthernBobwhite_ScaffoldedDeNovo_contig_121400	gi|358485511|ref|NC_006088.3 | GGA1	85.49	965	102	11	3	946	1674541	1673594	0	1094	2	S
NorthernBobwhite_ScaffoldedDeNovo_contig_43287	gi|358485511|ref|NC_006088.3 | GGA1	82.82	326	53	2	299	623	1675431	1675754	6e-88	329	1889	M
NorthernBobwhite_ScaffoldedDeNovo_contig_79944	gi|358485511|ref|NC_006088.3 | GGA1	87.58	451	51	2	3	453	1677094	1676649	2e-156	556	2	S
NorthernBobwhite_ScaffoldedDeNovo_contig_186219	gi|358485511|ref|NC_006088.3 | GGA1	84.62	429	57	3	1	424	1679632	1680056	3e-131	471	4405	M
NorthernBobwhite_ScaffoldedDeNovo_contig_180219	gi|358485511|ref|NC_006088.3 | GGA1	84.58	428	60	3	1	427	1679634	1680056	1e-129	466	3300	M
NorthernBobwhite_ScaffoldedDeNovo_contig_20286	gi|358485511|ref|NC_006088.3 | GGA1	86.9	2092	210	9	9268	11304	1686636	1684554	0	2554	42658	M
NorthernBobwhite_ScaffoldedDeNovo_contig_194421	gi|358485511|ref|NC_006088.3 | GGA1	75.66	567	75	12	15	519	1689820	1690385	3e-110	403	6603	M
NorthernBobwhite_ScaffoldedDeNovo_contig_40818	gi|358485511|ref|NC_006088.3 | GGA1	87.23	188	23	1	488	674	1698951	1698764	1e-57	228	3	S
NorthernBobwhite_ScaffoldedDeNovo_contig_51663	gi|358485511|ref|NC_006088.3 | GGA1	76.76	185	21	2	1	184	1699399	1699236	1e-34	150	1	S
NorthernBobwhite_ScaffoldedDeNovo_contig_44652	gi|358485511|ref|NC_006088.3 | GGA1	85.19	54	8	0	566	619	1701522	1701575	2e-07	62.6	379	M
NorthernBobwhite_ScaffoldedDeNovo_contig_219553	gi|358485511|ref|NC_006088.3 | GGA1	93.1	29	2	0	173	201	1701584	1701556	0.012	44.6	104	M
NorthernBobwhite_ScaffoldedDeNovo_contig_123846	gi|358485511|ref|NC_006088.3 | GGA1	78.22	675	108	11	292	948	1713430	1712777	3e-151	540	255	M
NorthernBobwhite_ScaffoldedDeNovo_contig_15636	gi|358485511|ref|NC_006088.3 | GGA1	88.62	3024	274	24	5403	8374	1717458	1714453	0	3858	53564	M
NorthernBobwhite_ScaffoldedDeNovo_contig_16113	gi|358485511|ref|NC_006088.3 | GGA1	84.53	5145	545	56	8959	13975	1731537	1736558	0	5663	4068	M
NorthernBobwhite_ScaffoldedDeNovo_contig_144901	gi|358485511|ref|NC_006088.3 | GGA1	78.07	383	70	5	1	371	1736535	1736915	3e-80	302	1	S
NorthernBobwhite_ScaffoldedDeNovo_contig_144902	gi|358485511|ref|NC_006088.3 | GGA1	78.07	383	70	5	1	371	1736535	1736915	3e-80	302	1	S
NorthernBobwhite_ScaffoldedDeNovo_contig_155230	gi|358485511|ref|NC_006088.3 | GGA1	78.03	173	25	3	535	696	1745328	1745498	5e-31	140	1	S
NorthernBobwhite_ScaffoldedDeNovo_contig_49021	gi|358485511|ref|NC_006088.3 | GGA1	91.63	430	34	1	1	428	1746938	1747367	6e-173	610	1	S
NorthernBobwhite_ScaffoldedDeNovo_contig_56633	gi|358485511|ref|NC_006088.3 | GGA1	86.17	629	67	5	210	837	1749431	1750040	0	738	4244	M
NorthernBobwhite_ScaffoldedDeNovo_contig_167080	gi|358485511|ref|NC_006088.3 | GGA1	74.94	439	51	5	1	382	1750491	1750055	1e-87	327	1	S
NorthernBobwhite_ScaffoldedDeNovo_contig_23233	gi|358485511|ref|NC_006088.3 | GGA1	82.27	2442	305	27	2065	4451	1752969	1755337	0	2446	6774	M
NorthernBobwhite_ScaffoldedDeNovo_contig_94167	gi|358485511|ref|NC_006088.3 | GGA1	84.25	438	54	4	1	432	1757506	1757934	3e-132	475	1	S
NorthernBobwhite_ScaffoldedDeNovo_contig_110937	gi|358485511|ref|NC_006088.3 | GGA1	82.81	256	40	3	165	418	1758986	1759239	2e-65	253	6258	M
NorthernBobwhite_ScaffoldedDeNovo_contig_32360	gi|358485511|ref|NC_006088.3 | GGA1	82.74	4184	520	51	95	4136	1763414	1759291	0	4242	1	S
NorthernBobwhite_ScaffoldedDeNovo_contig_2418	gi|358485511|ref|NC_006088.3 | GGA1	79.96	1901	255	23	1	1820	1765454	1763599	0	1721	43	M
NorthernBobwhite_ScaffoldedDeNovo_contig_87773	gi|358485511|ref|NC_006088.3 | GGA1	82.95	862	110	10	81	927	1766494	1765655	0	881	52	M
NorthernBobwhite_ScaffoldedDeNovo_contig_2419	gi|358485511|ref|NC_006088.3 | GGA1	83.96	1771	174	18	1	1746	1766706	1768391	0	1932	2	S
NorthernBobwhite_ScaffoldedDeNovo_contig_89054	gi|358485511|ref|NC_006088.3 | GGA1	84.49	361	39	4	2	349	1774922	1775278	2e-108	396	1	S
NorthernBobwhite_ScaffoldedDeNovo_contig_89055	gi|358485511|ref|NC_006088.3 | GGA1	86.43	361	36	4	2	353	1774922	1775278	4e-117	425	1	S
NorthernBobwhite_ScaffoldedDeNovo_contig_190355	gi|358485511|ref|NC_006088.3 | GGA1	82.19	483	47	7	1	453	1780007	1780480	5e-136	488	1	S
NorthernBobwhite_ScaffoldedDeNovo_contig_105976	gi|358485511|ref|NC_006088.3 | GGA1	68.15	540	83	11	1	470	1780455	1780975	2e-58	230	1	S
NorthernBobwhite_ScaffoldedDeNovo_contig_168435	gi|358485511|ref|NC_006088.3 | GGA1	81.99	483	48	7	1	453	1780480	1780007	2e-134	482	1	S
NorthernBobwhite_ScaffoldedDeNovo_contig_105977	gi|358485511|ref|NC_006088.3 | GGA1	73.51	302	36	6	1	299	1781392	1781132	1e-48	197	1	S
NorthernBobwhite_ScaffoldedDeNovo_contig_66622	gi|358485511|ref|NC_006088.3 | GGA1	84.19	759	93	12	320	1061	1781838	1782586	0	798	2	S
NorthernBobwhite_ScaffoldedDeNovo_contig_215248	gi|358485511|ref|NC_006088.3 | GGA1	82.39	318	31	7	1	313	1782561	1782858	2e-83	313	2	S
NorthernBobwhite_ScaffoldedDeNovo_contig_135495	gi|358485511|ref|NC_006088.3 | GGA1	81.29	326	28	9	138	458	1782858	1782561	4e-80	302	2	S
NorthernBobwhite_ScaffoldedDeNovo_contig_86317	gi|358485511|ref|NC_006088.3 | GGA1	84.91	212	28	1	104	311	1790209	1789998	9e-61	237	3	M
NorthernBobwhite_ScaffoldedDeNovo_contig_2408	gi|358485511|ref|NC_006088.3 | GGA1	89.84	2304	215	10	22548	24844	1792410	1794701	0	3072	50744	M
NorthernBobwhite_ScaffoldedDeNovo_contig_54517	gi|358485511|ref|NC_006088.3 | GGA1	78.1	977	177	11	1	948	1820879	1819911	0	791	2008	M
NorthernBobwhite_ScaffoldedDeNovo_contig_31075	gi|358485511|ref|NC_006088.3 | GGA1	83.17	1895	218	21	1456	3295	1826305	1824457	0	1975	26007	M
NorthernBobwhite_ScaffoldedDeNovo_contig_66211	gi|358485511|ref|NC_006088.3 | GGA1	70.83	192	56	0	26	217	1838674	1838483	8e-18	95.1	82	M
NorthernBobwhite_ScaffoldedDeNovo_contig_35875	gi|358485511|ref|NC_006088.3 | GGA1	80.99	142	27	0	50	191	1839146	1839287	2e-29	134	12	M
NorthernBobwhite_ScaffoldedDeNovo_contig_44362	gi|358485511|ref|NC_006088.3 | GGA1	71.18	406	98	7	3	392	1840209	1840611	2e-46	190	12	M
NorthernBobwhite_ScaffoldedDeNovo_contig_156004	gi|358485511|ref|NC_006088.3 | GGA1	83.82	173	28	0	5245	5417	1841978	1842150	3e-44	187	2	S
NorthernBobwhite_ScaffoldedDeNovo_contig_103744	gi|358485511|ref|NC_006088.3 | GGA1	82.09	430	56	4	11	440	1842620	1843028	1e-118	430	1	S
NorthernBobwhite_ScaffoldedDeNovo_contig_49695	gi|358485511|ref|NC_006088.3 | GGA1	84.92	199	28	1	5293	5489	1843198	1843396	1e-54	221	8	M
NorthernBobwhite_ScaffoldedDeNovo_contig_15475	gi|358485511|ref|NC_006088.3 | GGA1	84.85	3788	395	42	637	4296	1847405	1843669	0	4215	97	M
NorthernBobwhite_ScaffoldedDeNovo_contig_153236	gi|358485511|ref|NC_006088.3 | GGA1	91.71	362	29	1	7	368	1848669	1849029	3e-144	515	1	S
NorthernBobwhite_ScaffoldedDeNovo_contig_23879	gi|358485511|ref|NC_006088.3 | GGA1	72.66	289	73	1	33	315	1856230	1856518	1e-39	167	21	M
NorthernBobwhite_ScaffoldedDeNovo_contig_24068	gi|358485511|ref|NC_006088.3 | GGA1	74.48	431	94	5	6	426	1856654	1856230	2e-71	273	62	M
NorthernBobwhite_ScaffoldedDeNovo_contig_90779	gi|358485511|ref|NC_006088.3 | GGA1	71.82	330	73	2	1	321	1858108	1858426	5e-45	185	16	M
NorthernBobwhite_ScaffoldedDeNovo_contig_49874	gi|358485511|ref|NC_006088.3 | GGA1	85.62	6565	709	54	3773	10165	1871864	1878365	0	7551	3417	M
NorthernBobwhite_ScaffoldedDeNovo_contig_114959	gi|358485511|ref|NC_006088.3 | GGA1	85.29	1074	115	12	1	1044	1881218	1880158	0	1209	529	M
NorthernBobwhite_ScaffoldedDeNovo_contig_43695	gi|358485511|ref|NC_006088.3 | GGA1	82.77	354	47	2	153	498	1881618	1881271	1e-99	367	56	M
NorthernBobwhite_ScaffoldedDeNovo_contig_36986	gi|358485511|ref|NC_006088.3 | GGA1	77.81	338	33	8	3	334	1882113	1881812	1e-71	273	5521	M
NorthernBobwhite_ScaffoldedDeNovo_contig_99480	gi|358485511|ref|NC_006088.3 | GGA1	78.17	339	30	9	3	334	1882113	1881812	1e-72	277	8087	M
NorthernBobwhite_ScaffoldedDeNovo_contig_105180	gi|358485511|ref|NC_006088.3 | GGA1	86.03	594	68	4	29	616	1883350	1882766	0	693	1082	M
NorthernBobwhite_ScaffoldedDeNovo_contig_16421	gi|358485511|ref|NC_006088.3 | GGA1	84.92	9998	1103	99	5634	15444	1894651	1884872	0	11150	32006	M
NorthernBobwhite_ScaffoldedDeNovo_contig_21478	gi|358485511|ref|NC_006088.3 | GGA1	88.64	845	86	5	5	842	1896994	1897835	0	1077	1	S
NorthernBobwhite_ScaffoldedDeNovo_contig_105205	gi|358485511|ref|NC_006088.3 | GGA1	87.84	839	83	5	251	1076	1901428	1900596	0	1049	2	S
NorthernBobwhite_ScaffoldedDeNovo_contig_16872	gi|358485511|ref|NC_006088.3 | GGA1	80.42	4709	632	66	7224	11785	1910250	1914815	0	4300	17402	M
NorthernBobwhite_ScaffoldedDeNovo_contig_139783	gi|358485511|ref|NC_006088.3 | GGA1	70.55	343	68	4	3	345	1917057	1917366	3e-42	176	432	M
NorthernBobwhite_ScaffoldedDeNovo_contig_197916	gi|358485511|ref|NC_006088.3 | GGA1	70.57	350	68	7	1	348	1917373	1917057	2e-39	167	203	M
NorthernBobwhite_ScaffoldedDeNovo_contig_163486	gi|358485511|ref|NC_006088.3 | GGA1	76.79	405	63	8	3	404	1917729	1917353	4e-79	298	1	S
NorthernBobwhite_ScaffoldedDeNovo_contig_150485	gi|358485511|ref|NC_006088.3 | GGA1	81.03	870	117	11	1	845	1917846	1918692	0	820	1	S
NorthernBobwhite_ScaffoldedDeNovo_contig_33852	gi|358485511|ref|NC_006088.3 | GGA1	80.6	2356	346	36	5844	8139	1922239	1924543	0	2134	16688	M
NorthernBobwhite_ScaffoldedDeNovo_contig_107333	gi|358485511|ref|NC_006088.3 | GGA1	80.5	923	115	18	2	883	1924694	1925592	0	830	1	S
NorthernBobwhite_ScaffoldedDeNovo_contig_41196	gi|358485511|ref|NC_006088.3 | GGA1	79.44	608	68	19	2	572	1926194	1925607	4e-139	499	1	S
NorthernBobwhite_ScaffoldedDeNovo_contig_96888	gi|358485511|ref|NC_006088.3 | GGA1	80.26	228	33	6	32	249	1926416	1926191	3e-47	192	1	S
NorthernBobwhite_ScaffoldedDeNovo_contig_37480	gi|358485511|ref|NC_006088.3 | GGA1	84.18	2326	224	29	5242	7459	1931612	1933901	0	2535	20692	M
NorthernBobwhite_ScaffoldedDeNovo_contig_171545	gi|358485511|ref|NC_006088.3 | GGA1	82.82	291	35	3	78	366	1939994	1939717	1e-79	300	1	S
NorthernBobwhite_ScaffoldedDeNovo_contig_206644	gi|358485511|ref|NC_006088.3 | GGA1	82.99	288	37	4	78	363	1939994	1939717	6e-77	291	1	S
NorthernBobwhite_ScaffoldedDeNovo_contig_95908	gi|358485511|ref|NC_006088.3 | GGA1	84.45	1338	148	12	2	1332	1940207	1941491	0	1476	1	S
NorthernBobwhite_ScaffoldedDeNovo_contig_139682	gi|358485511|ref|NC_006088.3 | GGA1	86.39	441	52	4	10	445	1941978	1942415	3e-144	515	1	S
NorthernBobwhite_ScaffoldedDeNovo_contig_139683	gi|358485511|ref|NC_006088.3 | GGA1	85.68	440	56	3	1	435	1942415	1941978	2e-140	502	1	S
NorthernBobwhite_ScaffoldedDeNovo_contig_60468	gi|358485511|ref|NC_006088.3 | GGA1	86.26	313	40	3	491	801	1942701	1942390	3e-97	360	1	S
NorthernBobwhite_ScaffoldedDeNovo_contig_188069	gi|358485511|ref|NC_006088.3 | GGA1	77.21	294	45	4	1	288	1978853	1979130	2e-58	230	2	S
NorthernBobwhite_ScaffoldedDeNovo_contig_39779	gi|358485511|ref|NC_006088.3 | GGA1	77.6	192	30	4	9	194	1978942	1979126	1e-33	147	1	S
NorthernBobwhite_ScaffoldedDeNovo_contig_37045	gi|358485511|ref|NC_006088.3 | GGA1	77.89	294	40	3	249	533	1979130	1978853	3e-63	246	8	M
NorthernBobwhite_ScaffoldedDeNovo_contig_188438	gi|358485511|ref|NC_006088.3 | GGA1	84.59	370	47	5	1	365	1985394	1985758	5e-109	398	1	S
NorthernBobwhite_ScaffoldedDeNovo_contig_43126	gi|358485511|ref|NC_006088.3 | GGA1	85.67	6568	696	69	15636	22082	1997591	1991148	0	7512	59591	M
NorthernBobwhite_ScaffoldedDeNovo_contig_123751	gi|358485511|ref|NC_006088.3 | GGA1	87.34	379	39	4	1	374	1999591	1999965	7e-127	457	1	S
NorthernBobwhite_ScaffoldedDeNovo_contig_114340	gi|358485511|ref|NC_006088.3 | GGA1	79.33	745	112	12	297	1014	2001608	2002337	1e-179	634	18155	M
NorthernBobwhite_ScaffoldedDeNovo_contig_180573	gi|358485511|ref|NC_006088.3 | GGA1	91.18	34	3	0	1	34	2008469	2008436	0.001	48.2	154	M
NorthernBobwhite_ScaffoldedDeNovo_contig_115717	gi|358485511|ref|NC_006088.3 | GGA1	82.28	333	47	3	7	339	2008945	2008625	2e-89	333	1	S
NorthernBobwhite_ScaffoldedDeNovo_contig_2191	gi|358485511|ref|NC_006088.3 | GGA1	86.2	2711	254	26	6110	8775	2008950	2011585	0	3195	2486	M
NorthernBobwhite_ScaffoldedDeNovo_contig_193575	gi|358485511|ref|NC_006088.3 | GGA1	84.47	264	28	3	1	255	2011968	2012227	2e-76	289	3	M
NorthernBobwhite_ScaffoldedDeNovo_contig_144265	gi|358485511|ref|NC_006088.3 | GGA1	89.86	355	27	3	1	349	2014682	2014331	8e-132	473	1	S
NorthernBobwhite_ScaffoldedDeNovo_contig_124088	gi|358485511|ref|NC_006088.3 | GGA1	85	40	6	0	9	48	2028806	2028767	0.008	46.4	230	M
NorthernBobwhite_ScaffoldedDeNovo_contig_102612	gi|358485511|ref|NC_006088.3 | GGA1	85.03	1570	166	13	1	1523	2031564	2030017	0	1775	2	S
NorthernBobwhite_ScaffoldedDeNovo_contig_46158	gi|358485511|ref|NC_006088.3 | GGA1	85.91	440	44	4	3	437	2032354	2031928	1e-143	513	1	S
NorthernBobwhite_ScaffoldedDeNovo_contig_58339	gi|358485511|ref|NC_006088.3 | GGA1	87	1146	120	13	1	1134	2033460	2032332	0	1362	1	S
NorthernBobwhite_ScaffoldedDeNovo_contig_115870	gi|358485511|ref|NC_006088.3 | GGA1	86.99	899	112	3	3	900	2054428	2053534	0	1085	6140	M
NorthernBobwhite_ScaffoldedDeNovo_contig_63723	gi|358485511|ref|NC_006088.3 | GGA1	84.74	439	62	3	633	1067	2061586	2061149	2e-133	480	2	S
NorthernBobwhite_ScaffoldedDeNovo_contig_47426	gi|358485511|ref|NC_006088.3 | GGA1	88.88	1097	102	6	8	1097	2074607	2075690	0	1420	1	S
NorthernBobwhite_ScaffoldedDeNovo_contig_16783	gi|358485511|ref|NC_006088.3 | GGA1	90.13	5979	463	31	55062	60973	2092168	2098086	0	8098	85195	M
NorthernBobwhite_ScaffoldedDeNovo_contig_33272	gi|358485511|ref|NC_006088.3 | GGA1	87.96	1005	56	9	145	1085	2105265	2104262	0	1285	6	M
NorthernBobwhite_ScaffoldedDeNovo_contig_190354	gi|358485511|ref|NC_006088.3 | GGA1	96.3	27	1	0	3	29	2121377	2121403	0.013	44.6	26	M
NorthernBobwhite_ScaffoldedDeNovo_contig_180694	gi|358485511|ref|NC_006088.3 | GGA1	91.12	383	34	0	1	383	2122520	2122138	3e-151	538	1	S
NorthernBobwhite_ScaffoldedDeNovo_contig_177312	gi|358485511|ref|NC_006088.3 | GGA1	84.62	78	12	0	256	333	2127465	2127542	2e-15	87.8	4303	M
NorthernBobwhite_ScaffoldedDeNovo_contig_7424	gi|358485511|ref|NC_006088.3 | GGA1	87.48	4330	351	41	8046	12240	2130508	2134781	0	5353	18560	M
NorthernBobwhite_ScaffoldedDeNovo_contig_47219	gi|358485511|ref|NC_006088.3 | GGA1	90.02	1393	111	5	1711	3100	2141284	2142651	0	1889	16418	M
NorthernBobwhite_ScaffoldedDeNovo_contig_176093	gi|358485511|ref|NC_006088.3 | GGA1	80.43	281	40	2	260	528	2147161	2146884	1e-68	264	2	S
NorthernBobwhite_ScaffoldedDeNovo_contig_83622	gi|358485511|ref|NC_006088.3 | GGA1	93.02	1075	62	4	3	1076	2147294	2148356	0	1595	1	S
NorthernBobwhite_ScaffoldedDeNovo_contig_61270	gi|358485511|ref|NC_006088.3 | GGA1	84.62	338	34	2	1	320	2148330	2148667	1e-104	383	2	M
NorthernBobwhite_ScaffoldedDeNovo_contig_108006	gi|358485511|ref|NC_006088.3 | GGA1	85.21	338	32	2	1	320	2148667	2148330	2e-107	392	2	M
NorthernBobwhite_ScaffoldedDeNovo_contig_184818	gi|358485511|ref|NC_006088.3 | GGA1	80.06	336	43	3	1	324	2155316	2155639	2e-83	313	1	S
NorthernBobwhite_ScaffoldedDeNovo_contig_117469	gi|358485511|ref|NC_006088.3 | GGA1	82.01	328	55	2	1	328	2155639	2155316	1e-85	320	1	S
NorthernBobwhite_ScaffoldedDeNovo_contig_1519	gi|358485511|ref|NC_006088.3 | GGA1	87.79	5789	530	41	16395	22123	2164780	2170451	0	7227	15057	M
NorthernBobwhite_ScaffoldedDeNovo_contig_168258	gi|358485511|ref|NC_006088.3 | GGA1	79.71	350	60	3	2	348	2183939	2184280	7e-82	307	153	M
NorthernBobwhite_ScaffoldedDeNovo_contig_196567	gi|358485511|ref|NC_006088.3 | GGA1	80.57	350	58	2	1	348	2184280	2183939	3e-87	325	164	M
NorthernBobwhite_ScaffoldedDeNovo_contig_125668	gi|358485511|ref|NC_006088.3 | GGA1	83.94	741	96	6	2	740	2194771	2195490	0	794	4	M
NorthernBobwhite_ScaffoldedDeNovo_contig_68239	gi|358485511|ref|NC_006088.3 | GGA1	80.62	1125	147	17	127	1194	2196995	2195885	0	1034	1	S
NorthernBobwhite_ScaffoldedDeNovo_contig_83479	gi|358485511|ref|NC_006088.3 | GGA1	90.2	347	18	5	1	333	2199116	2199460	4e-129	464	1	S
NorthernBobwhite_ScaffoldedDeNovo_contig_150991	gi|358485511|ref|NC_006088.3 | GGA1	77.55	49	11	0	366	414	2200601	2200553	1.4	39.2	5	M
NorthernBobwhite_ScaffoldedDeNovo_contig_164075	gi|358485511|ref|NC_006088.3 | GGA1	88.87	683	32	8	7	672	2200616	2199961	0	893	1	S
NorthernBobwhite_ScaffoldedDeNovo_contig_185453	gi|358485511|ref|NC_006088.3 | GGA1	85.76	330	44	2	2	328	2211115	2211444	4e-103	378	1	S
NorthernBobwhite_ScaffoldedDeNovo_contig_110499	gi|358485511|ref|NC_006088.3 | GGA1	92.38	341	21	2	3	343	2211504	2211839	8e-138	493	1	S
NorthernBobwhite_ScaffoldedDeNovo_contig_48443	gi|358485511|ref|NC_006088.3 | GGA1	84.48	902	97	8	1	864	2212109	2213005	0	998	838	M
NorthernBobwhite_ScaffoldedDeNovo_contig_46807	gi|358485511|ref|NC_006088.3 | GGA1	84.89	331	39	3	1	330	2212134	2211814	2e-100	369	1	S
NorthernBobwhite_ScaffoldedDeNovo_contig_46808	gi|358485511|ref|NC_006088.3 | GGA1	82.6	339	40	4	1	338	2212134	2211814	3e-93	345	1	S
NorthernBobwhite_ScaffoldedDeNovo_contig_153435	gi|358485511|ref|NC_006088.3 | GGA1	93.1	29	2	0	703	731	2213309	2213281	0.055	44.6	134	M
NorthernBobwhite_ScaffoldedDeNovo_contig_186109	gi|358485511|ref|NC_006088.3 | GGA1	93.94	33	1	1	206	237	2230074	2230042	0.001	48.2	149	M
NorthernBobwhite_ScaffoldedDeNovo_contig_79	gi|358485511|ref|NC_006088.3 | GGA1	88	10247	862	60	10653	20705	2236053	2225981	0	13000	123743	M
NorthernBobwhite_ScaffoldedDeNovo_contig_31830	gi|358485511|ref|NC_006088.3 | GGA1	86.48	5679	579	48	13174	18754	2252244	2246657	0	6733	782	M
NorthernBobwhite_ScaffoldedDeNovo_contig_138917	gi|358485511|ref|NC_006088.3 | GGA1	83.5	297	45	3	1	293	2262624	2262328	2e-81	306	6160	M
NorthernBobwhite_ScaffoldedDeNovo_contig_78679	gi|358485511|ref|NC_006088.3 | GGA1	83.5	297	45	3	1	293	2262624	2262328	2e-81	306	5976	M
NorthernBobwhite_ScaffoldedDeNovo_contig_153538	gi|358485511|ref|NC_006088.3 | GGA1	79.68	187	21	4	191	370	2264698	2264874	2e-38	163	525	M
NorthernBobwhite_ScaffoldedDeNovo_contig_31161	gi|358485511|ref|NC_006088.3 | GGA1	83.28	634	85	5	1	620	2265476	2264850	0	663	1	S
NorthernBobwhite_ScaffoldedDeNovo_contig_111433	gi|358485511|ref|NC_006088.3 | GGA1	88.46	468	41	4	100	562	2266086	2265627	6e-168	594	1	S
NorthernBobwhite_ScaffoldedDeNovo_contig_16638	gi|358485511|ref|NC_006088.3 | GGA1	82.56	7219	870	83	21960	28902	2274396	2267291	0	7319	25871	M
NorthernBobwhite_ScaffoldedDeNovo_contig_66464	gi|358485511|ref|NC_006088.3 | GGA1	78.29	152	26	3	173	318	2280271	2280421	7e-25	118	76	M
NorthernBobwhite_ScaffoldedDeNovo_contig_30818	gi|358485511|ref|NC_006088.3 | GGA1	85.25	2292	272	18	2	2268	2280419	2278169	0	2589	7193	M
NorthernBobwhite_ScaffoldedDeNovo_contig_94888	gi|358485511|ref|NC_006088.3 | GGA1	82.73	388	60	3	1	388	2291437	2291817	8e-107	390	12446	M
NorthernBobwhite_ScaffoldedDeNovo_contig_94887	gi|358485511|ref|NC_006088.3 | GGA1	83.51	388	57	3	1	388	2291437	2291817	4e-111	405	11679	M
NorthernBobwhite_ScaffoldedDeNovo_contig_2262	gi|358485511|ref|NC_006088.3 | GGA1	87.04	7495	757	56	1	7369	2302303	2294897	0	9079	30275	M
NorthernBobwhite_ScaffoldedDeNovo_contig_89117	gi|358485511|ref|NC_006088.3 | GGA1	90.88	329	23	3	373	695	2303034	2302707	5e-125	452	2	S
NorthernBobwhite_ScaffoldedDeNovo_contig_16643	gi|358485511|ref|NC_006088.3 | GGA1	86.04	4677	484	30	12842	17395	2309973	2305343	0	5508	24655	M
NorthernBobwhite_ScaffoldedDeNovo_contig_187399	gi|358485511|ref|NC_006088.3 | GGA1	88.27	307	32	2	1	304	2323651	2323346	8e-106	387	1	S
NorthernBobwhite_ScaffoldedDeNovo_contig_28393	gi|358485511|ref|NC_006088.3 | GGA1	88.64	5494	449	37	6057	11452	2329581	2334997	0	7086	12468	M
NorthernBobwhite_ScaffoldedDeNovo_contig_39938	gi|358485511|ref|NC_006088.3 | GGA1	89.57	719	71	3	4	721	2335063	2335778	0	949	4	S
NorthernBobwhite_ScaffoldedDeNovo_contig_100096	gi|358485511|ref|NC_006088.3 | GGA1	90.85	481	42	2	7	486	2360422	2360901	0	663	2	S
NorthernBobwhite_ScaffoldedDeNovo_contig_47939	gi|358485511|ref|NC_006088.3 | GGA1	91.62	394	32	1	3	395	2362535	2362142	3e-157	558	1	S
NorthernBobwhite_ScaffoldedDeNovo_contig_164636	gi|358485511|ref|NC_006088.3 | GGA1	90.1	869	64	4	3	859	2363546	2362688	0	1182	1	S
NorthernBobwhite_ScaffoldedDeNovo_contig_108681	gi|358485511|ref|NC_006088.3 | GGA1	95.79	380	16	0	375	754	2364139	2363760	8e-174	614	2	S
NorthernBobwhite_ScaffoldedDeNovo_contig_14647	gi|358485511|ref|NC_006088.3 | GGA1	88.26	7190	666	36	16530	23597	2370302	2377435	0	9160	25448	M
NorthernBobwhite_ScaffoldedDeNovo_contig_116903	gi|358485511|ref|NC_006088.3 | GGA1	81.36	118	21	1	1	118	2370979	2371095	2e-22	111	1	S
NorthernBobwhite_ScaffoldedDeNovo_contig_91130	gi|358485511|ref|NC_006088.3 | GGA1	89.47	171	18	0	6	176	2378749	2378919	7e-58	228	1492	M
NorthernBobwhite_ScaffoldedDeNovo_contig_128183	gi|358485511|ref|NC_006088.3 | GGA1	79.28	251	33	3	1	245	2391754	2391991	2e-56	223	1	S
NorthernBobwhite_ScaffoldedDeNovo_contig_141861	gi|358485511|ref|NC_006088.3 | GGA1	78.88	251	34	3	1	245	2391754	2391991	1e-54	217	1	S
NorthernBobwhite_ScaffoldedDeNovo_contig_18095	gi|358485511|ref|NC_006088.3 | GGA1	88.5	3808	321	27	7637	11389	2395768	2392023	0	4877	26449	M
NorthernBobwhite_ScaffoldedDeNovo_contig_132158	gi|358485511|ref|NC_006088.3 | GGA1	83.21	411	68	1	3	413	2402599	2403008	1e-117	426	8927	M
NorthernBobwhite_ScaffoldedDeNovo_contig_91847	gi|358485511|ref|NC_006088.3 | GGA1	81.17	563	79	6	1	546	2405008	2404456	5e-150	535	873	M
NorthernBobwhite_ScaffoldedDeNovo_contig_104619	gi|358485511|ref|NC_006088.3 | GGA1	83.15	1157	113	16	1	1113	2410215	2409097	0	1209	17	M
NorthernBobwhite_ScaffoldedDeNovo_contig_60016	gi|358485511|ref|NC_006088.3 | GGA1	82.02	356	45	4	33	376	2410491	2410839	2e-95	352	2536	M
NorthernBobwhite_ScaffoldedDeNovo_contig_10182	gi|358485511|ref|NC_006088.3 | GGA1	86.94	3201	321	25	7808	10952	2418461	2415302	0	3864	5177	M
NorthernBobwhite_ScaffoldedDeNovo_contig_172479	gi|358485511|ref|NC_006088.3 | GGA1	85.37	41	3	1	5	45	2426619	2426582	0.004	46.4	67	M
NorthernBobwhite_ScaffoldedDeNovo_contig_18313	gi|358485511|ref|NC_006088.3 | GGA1	84.51	7184	811	66	1524	8504	2427892	2434976	0	7923	69718	M
NorthernBobwhite_ScaffoldedDeNovo_contig_218791	gi|358485511|ref|NC_006088.3 | GGA1	96.43	28	1	0	304	331	2447666	2447639	0.003	46.4	700	M
NorthernBobwhite_ScaffoldedDeNovo_contig_70372	gi|358485511|ref|NC_006088.3 | GGA1	92.51	601	44	1	1	600	2450599	2451199	0	877	1	S
NorthernBobwhite_ScaffoldedDeNovo_contig_149692	gi|358485511|ref|NC_006088.3 | GGA1	82.99	194	24	2	179	368	2454447	2454635	8e-50	201	90	M
NorthernBobwhite_ScaffoldedDeNovo_contig_149693	gi|358485511|ref|NC_006088.3 | GGA1	80.31	193	26	3	180	365	2454448	2454635	3e-43	179	2	M
NorthernBobwhite_ScaffoldedDeNovo_contig_41080	gi|358485511|ref|NC_006088.3 | GGA1	77.73	431	64	10	8	415	2457309	2457730	3e-88	329	2927	M
NorthernBobwhite_ScaffoldedDeNovo_contig_105536	gi|358485511|ref|NC_006088.3 | GGA1	78.13	407	61	7	4	388	2457730	2457330	9e-88	327	3569	M
NorthernBobwhite_ScaffoldedDeNovo_contig_60545	gi|358485511|ref|NC_006088.3 | GGA1	87.1	31	4	0	579	609	2474067	2474097	1.2	39.2	11	M
NorthernBobwhite_ScaffoldedDeNovo_contig_71187	gi|358485511|ref|NC_006088.3 | GGA1	83.05	2797	281	24	1	2640	2475830	2473070	0	2973	1	S
NorthernBobwhite_ScaffoldedDeNovo_contig_71186	gi|358485511|ref|NC_006088.3 | GGA1	88.71	691	60	2	20	694	2476048	2476736	0	902	1	S
NorthernBobwhite_ScaffoldedDeNovo_contig_82358	gi|358485511|ref|NC_006088.3 | GGA1	89.02	346	36	2	1	345	2505840	2505496	1e-123	446	1	S
NorthernBobwhite_ScaffoldedDeNovo_contig_82359	gi|358485511|ref|NC_006088.3 | GGA1	87.03	347	35	4	1	339	2505840	2505496	6e-114	414	1	S
NorthernBobwhite_ScaffoldedDeNovo_contig_160297	gi|358485511|ref|NC_006088.3 | GGA1	87.1	31	4	0	221	251	2509433	2509463	0.52	39.2	6	M
NorthernBobwhite_ScaffoldedDeNovo_contig_184830	gi|358485511|ref|NC_006088.3 | GGA1	81.99	372	52	6	1	364	2524471	2524107	2e-96	356	1	S
NorthernBobwhite_ScaffoldedDeNovo_contig_188803	gi|358485511|ref|NC_006088.3 | GGA1	76.88	372	55	7	1	348	2524471	2524107	1e-73	280	1	S
NorthernBobwhite_ScaffoldedDeNovo_contig_142493	gi|358485511|ref|NC_006088.3 | GGA1	81.67	431	56	5	1	428	2534337	2534747	2e-115	419	1	S
NorthernBobwhite_ScaffoldedDeNovo_contig_153638	gi|358485511|ref|NC_006088.3 | GGA1	85.18	425	48	5	1	424	2534337	2534747	1e-131	473	1	S
NorthernBobwhite_ScaffoldedDeNovo_contig_8251	gi|358485511|ref|NC_006088.3 | GGA1	87.3	6904	681	46	52189	58976	2545897	2552720	0	8466	22272	M
NorthernBobwhite_ScaffoldedDeNovo_contig_31520	gi|358485511|ref|NC_006088.3 | GGA1	85.25	488	60	3	18	502	2557639	2558117	2e-155	553	1943	M
NorthernBobwhite_ScaffoldedDeNovo_contig_65626	gi|358485511|ref|NC_006088.3 | GGA1	87.56	386	48	0	1	386	2558654	2558269	6e-134	480	1	S
NorthernBobwhite_ScaffoldedDeNovo_contig_12309	gi|358485511|ref|NC_006088.3 | GGA1	90.34	4348	341	21	5949	10227	2564557	2568894	0	5925	16269	M
NorthernBobwhite_ScaffoldedDeNovo_contig_39309	gi|358485511|ref|NC_006088.3 | GGA1	83.33	762	85	9	15	766	2583050	2583779	0	800	1	S
NorthernBobwhite_ScaffoldedDeNovo_contig_16860	gi|358485511|ref|NC_006088.3 | GGA1	87.82	5747	527	49	32431	38050	2622451	2628151	0	7144	25073	M
NorthernBobwhite_ScaffoldedDeNovo_contig_24421	gi|358485511|ref|NC_006088.3 | GGA1	87.85	11072	874	104	7889	18759	2643567	2654368	0	13860	45508	M
NorthernBobwhite_ScaffoldedDeNovo_contig_196843	gi|358485511|ref|NC_006088.3 | GGA1	85.51	345	38	4	8	340	2654353	2654697	9e-107	390	1	S
NorthernBobwhite_ScaffoldedDeNovo_contig_93001	gi|358485511|ref|NC_006088.3 | GGA1	84.93	345	45	3	69	406	2654697	2654353	5e-104	381	1	S
NorthernBobwhite_ScaffoldedDeNovo_contig_17258	gi|358485511|ref|NC_006088.3 | GGA1	84.32	6816	737	49	4585	11168	2658580	2665295	0	7551	20500	M
NorthernBobwhite_ScaffoldedDeNovo_contig_75848	gi|358485511|ref|NC_006088.3 | GGA1	84.05	1931	230	15	822	2729	2668620	2670495	0	2096	15856	M
NorthernBobwhite_ScaffoldedDeNovo_contig_41008	gi|358485511|ref|NC_006088.3 | GGA1	83.86	6698	754	60	2	6439	2671177	2677807	0	7230	10822	M
NorthernBobwhite_ScaffoldedDeNovo_contig_63927	gi|358485511|ref|NC_006088.3 | GGA1	79.88	338	43	5	8	323	2694808	2694474	8e-81	304	3677	M
NorthernBobwhite_ScaffoldedDeNovo_contig_197523	gi|358485511|ref|NC_006088.3 | GGA1	85.12	168	22	1	5	169	2698148	2697981	4e-46	188	952	M
NorthernBobwhite_ScaffoldedDeNovo_contig_148108	gi|358485511|ref|NC_006088.3 | GGA1	89.12	340	32	2	1	339	2700959	2700624	1e-122	443	1	S
NorthernBobwhite_ScaffoldedDeNovo_contig_91240	gi|358485511|ref|NC_006088.3 | GGA1	85.52	145	21	0	7	151	2701065	2701209	3e-38	167	2	S
NorthernBobwhite_ScaffoldedDeNovo_contig_71146	gi|358485511|ref|NC_006088.3 | GGA1	82.96	487	60	3	3	467	2716765	2717250	4e-143	511	1	S
NorthernBobwhite_ScaffoldedDeNovo_contig_211939	gi|358485511|ref|NC_006088.3 | GGA1	84.86	449	40	3	2	424	2717233	2717679	3e-144	515	1	S
NorthernBobwhite_ScaffoldedDeNovo_contig_208966	gi|358485511|ref|NC_006088.3 | GGA1	84.82	494	70	4	1	490	2717254	2716762	9e-152	540	1	S
NorthernBobwhite_ScaffoldedDeNovo_contig_43541	gi|358485511|ref|NC_006088.3 | GGA1	87.18	39	4	1	292	329	2726728	2726690	0.015	44.6	710	M
NorthernBobwhite_ScaffoldedDeNovo_contig_3158	gi|358485511|ref|NC_006088.3 | GGA1	85.75	6002	651	45	59523	65426	2730697	2724802	0	6951	80008	M
NorthernBobwhite_ScaffoldedDeNovo_contig_139975	gi|358485511|ref|NC_006088.3 | GGA1	89.07	247	13	7	179	412	2731136	2730891	3e-81	306	2	S
NorthernBobwhite_ScaffoldedDeNovo_contig_55129	gi|358485511|ref|NC_006088.3 | GGA1	70.27	962	218	8	68	964	2744347	2745305	8e-131	471	98	M
NorthernBobwhite_ScaffoldedDeNovo_contig_159061	gi|358485511|ref|NC_006088.3 | GGA1	72.94	547	105	12	12	543	2748094	2748612	1e-80	304	416	M
NorthernBobwhite_ScaffoldedDeNovo_contig_32714	gi|358485511|ref|NC_006088.3 | GGA1	75.88	514	98	11	1	492	2748171	2748680	5e-92	342	433	M
NorthernBobwhite_ScaffoldedDeNovo_contig_148733	gi|358485511|ref|NC_006088.3 | GGA1	84.71	314	29	4	1	295	2783201	2782888	3e-94	349	1	S
NorthernBobwhite_ScaffoldedDeNovo_contig_175012	gi|358485511|ref|NC_006088.3 | GGA1	78.85	780	86	9	1	748	2785507	2786239	0	693	1	S
NorthernBobwhite_ScaffoldedDeNovo_contig_174646	gi|358485511|ref|NC_006088.3 | GGA1	92.86	28	2	0	1201	1228	2786858	2786831	0.25	42.8	17	M
NorthernBobwhite_ScaffoldedDeNovo_contig_155992	gi|358485511|ref|NC_006088.3 | GGA1	82.98	47	5	1	286	332	2794200	2794157	0.002	48.2	28	M
NorthernBobwhite_ScaffoldedDeNovo_contig_110583	gi|358485511|ref|NC_006088.3 | GGA1	95.45	198	9	0	333	530	2798535	2798732	3e-84	316	3	S
NorthernBobwhite_ScaffoldedDeNovo_contig_85348	gi|358485511|ref|NC_006088.3 | GGA1	88.71	505	50	1	5	502	2799890	2800394	0	655	1	S
NorthernBobwhite_ScaffoldedDeNovo_contig_71945	gi|358485511|ref|NC_006088.3 | GGA1	78.86	596	72	7	24	576	2800396	2800980	9e-147	524	1	S
NorthernBobwhite_ScaffoldedDeNovo_contig_77833	gi|358485511|ref|NC_006088.3 | GGA1	87.87	470	37	4	1	450	2801076	2801545	6e-167	590	1	S
NorthernBobwhite_ScaffoldedDeNovo_contig_181545	gi|358485511|ref|NC_006088.3 | GGA1	79.3	541	54	3	1	527	2802631	2803127	5e-143	511	1	S
NorthernBobwhite_ScaffoldedDeNovo_contig_106838	gi|358485511|ref|NC_006088.3 | GGA1	85.63	647	70	6	2485	3117	2802636	2801999	0	742	2	S
NorthernBobwhite_ScaffoldedDeNovo_contig_60760	gi|358485511|ref|NC_006088.3 | GGA1	84.1	239	35	2	193	428	2803412	2803174	2e-65	253	2	S
NorthernBobwhite_ScaffoldedDeNovo_contig_156251	gi|358485511|ref|NC_006088.3 | GGA1	93.17	439	26	2	281	716	2804320	2804757	0	652	2	S
NorthernBobwhite_ScaffoldedDeNovo_contig_135027	gi|358485511|ref|NC_006088.3 | GGA1	81	321	54	3	1	314	2806170	2805850	2e-78	297	2	S
NorthernBobwhite_ScaffoldedDeNovo_contig_60759	gi|358485511|ref|NC_006088.3 | GGA1	92.45	424	32	0	418	841	2806462	2806885	6e-176	621	2	S
NorthernBobwhite_ScaffoldedDeNovo_contig_180765	gi|358485511|ref|NC_006088.3 | GGA1	92.92	113	8	0	1	113	2807120	2807008	5e-40	168	1	S
NorthernBobwhite_ScaffoldedDeNovo_contig_2808	gi|358485511|ref|NC_006088.3 | GGA1	88.28	2953	298	14	2386	5328	2813440	2810526	0	3746	26412	M
NorthernBobwhite_ScaffoldedDeNovo_contig_58401	gi|358485511|ref|NC_006088.3 | GGA1	86.64	494	56	5	1	492	2814104	2813619	1e-163	580	1	S
NorthernBobwhite_ScaffoldedDeNovo_contig_11003	gi|358485511|ref|NC_006088.3 | GGA1	76.93	789	115	14	7	763	2816032	2816785	2e-169	600	349	M
NorthernBobwhite_ScaffoldedDeNovo_contig_94077	gi|358485511|ref|NC_006088.3 | GGA1	86.31	811	100	7	1	805	2817647	2816842	0	940	1	S
NorthernBobwhite_ScaffoldedDeNovo_contig_82809	gi|358485511|ref|NC_006088.3 | GGA1	84.96	1217	126	12	1874	3047	2820487	2821689	0	1368	3	S
NorthernBobwhite_ScaffoldedDeNovo_contig_95786	gi|358485511|ref|NC_006088.3 | GGA1	83.48	587	71	7	1	564	2822313	2821730	6e-174	614	1	S
NorthernBobwhite_ScaffoldedDeNovo_contig_23243	gi|358485511|ref|NC_006088.3 | GGA1	87.64	5129	479	46	18416	23451	2845977	2840911	0	6323	47340	M
NorthernBobwhite_ScaffoldedDeNovo_contig_90970	gi|358485511|ref|NC_006088.3 | GGA1	77.44	430	61	8	1	427	2846826	2847222	6e-90	334	9728	M
NorthernBobwhite_ScaffoldedDeNovo_contig_90969	gi|358485511|ref|NC_006088.3 | GGA1	79.35	310	46	3	20	328	2846930	2847222	1e-71	273	9858	M
NorthernBobwhite_ScaffoldedDeNovo_contig_136020	gi|358485511|ref|NC_006088.3 | GGA1	82.19	629	82	7	1	619	2848209	2848817	4e-177	625	11640	M
NorthernBobwhite_ScaffoldedDeNovo_contig_59832	gi|358485511|ref|NC_006088.3 | GGA1	85.71	35	5	0	397	431	2875690	2875656	0.24	41	21	M
NorthernBobwhite_ScaffoldedDeNovo_contig_150526	gi|358485511|ref|NC_006088.3 | GGA1	84.83	811	93	8	48	840	2883515	2884313	0	899	399	M
NorthernBobwhite_ScaffoldedDeNovo_contig_47344	gi|358485511|ref|NC_006088.3 | GGA1	90.59	563	45	5	790	1347	2892553	2891994	0	762	40306	M
NorthernBobwhite_ScaffoldedDeNovo_contig_162067	gi|358485511|ref|NC_006088.3 | GGA1	77.43	226	42	3	57	274	2898851	2898627	3e-41	172	126	M
NorthernBobwhite_ScaffoldedDeNovo_contig_191402	gi|358485511|ref|NC_006088.3 | GGA1	78.32	226	40	3	49	266	2898851	2898627	6e-44	181	239	M
NorthernBobwhite_ScaffoldedDeNovo_contig_124259	gi|358485511|ref|NC_006088.3 | GGA1	78.67	300	42	7	123	402	2899044	2898747	1e-61	241	834	M
NorthernBobwhite_ScaffoldedDeNovo_contig_63312	gi|358485511|ref|NC_006088.3 | GGA1	88.89	36	4	0	36070	36105	2902814	2902779	0.15	48.2	20	M
NorthernBobwhite_ScaffoldedDeNovo_contig_121235	gi|358485511|ref|NC_006088.3 | GGA1	78.79	198	24	4	86	273	2903833	2903644	2e-39	167	2032	M
NorthernBobwhite_ScaffoldedDeNovo_contig_73444	gi|358485511|ref|NC_006088.3 | GGA1	83.26	233	34	3	724	955	2903877	2903649	1e-59	235	7690	M
NorthernBobwhite_ScaffoldedDeNovo_contig_51225	gi|358485511|ref|NC_006088.3 | GGA1	88.41	604	63	3	1	602	2913608	2914206	0	767	19596	M
NorthernBobwhite_ScaffoldedDeNovo_contig_85834	gi|358485511|ref|NC_006088.3 | GGA1	82.33	549	74	5	1	536	2936367	2936905	6e-155	551	1	S
NorthernBobwhite_ScaffoldedDeNovo_contig_111179	gi|358485511|ref|NC_006088.3 | GGA1	78.3	424	60	5	194	594	2936779	2936365	3e-96	356	2	S
NorthernBobwhite_ScaffoldedDeNovo_contig_114011	gi|358485511|ref|NC_006088.3 | GGA1	85.71	175	18	6	185	355	2937265	2937436	2e-44	183	1	S
NorthernBobwhite_ScaffoldedDeNovo_contig_114010	gi|358485511|ref|NC_006088.3 | GGA1	77.74	647	76	9	1	579	2938057	2937411	4e-151	538	1	S
NorthernBobwhite_ScaffoldedDeNovo_contig_82325	gi|358485511|ref|NC_006088.3 | GGA1	85.4	596	65	4	1	595	2939670	2940244	0	684	24097	M
NorthernBobwhite_ScaffoldedDeNovo_contig_12235	gi|358485511|ref|NC_006088.3 | GGA1	86.05	1068	110	7	1	1042	2940302	2941356	0	1258	2	S
NorthernBobwhite_ScaffoldedDeNovo_contig_177331	gi|358485511|ref|NC_006088.3 | GGA1	80.89	293	41	2	1	293	2941647	2941370	9e-74	280	484	M
NorthernBobwhite_ScaffoldedDeNovo_contig_187140	gi|358485511|ref|NC_006088.3 | GGA1	80.46	302	44	2	1	302	2941656	2941370	7e-75	284	480	M
NorthernBobwhite_ScaffoldedDeNovo_contig_60162	gi|358485511|ref|NC_006088.3 | GGA1	85.34	1071	127	11	1	1059	2942839	2941787	0	1202	27	M
NorthernBobwhite_ScaffoldedDeNovo_contig_38307	gi|358485511|ref|NC_006088.3 | GGA1	84.44	675	91	6	128	791	2952615	2953286	0	729	14465	M
NorthernBobwhite_ScaffoldedDeNovo_contig_7752	gi|358485511|ref|NC_006088.3 | GGA1	83.72	6462	791	59	25340	31586	2999024	2992609	0	6881	158560	M
NorthernBobwhite_ScaffoldedDeNovo_contig_105300	gi|358485511|ref|NC_006088.3 | GGA1	83.77	758	79	9	3	743	3015612	3014882	0	812	461	M
NorthernBobwhite_ScaffoldedDeNovo_contig_204879	gi|358485511|ref|NC_006088.3 | GGA1	100	21	0	0	581	601	3023951	3023971	1	39.2	1	S
NorthernBobwhite_ScaffoldedDeNovo_contig_161258	gi|358485511|ref|NC_006088.3 | GGA1	80.16	761	79	12	1	708	3029478	3028737	0	702	1	S
NorthernBobwhite_ScaffoldedDeNovo_contig_11601	gi|358485511|ref|NC_006088.3 | GGA1	89.08	3222	234	27	10993	14146	3035642	3038813	0	4208	19856	M
NorthernBobwhite_ScaffoldedDeNovo_contig_170945	gi|358485511|ref|NC_006088.3 | GGA1	79.04	334	48	4	55	368	3052755	3053086	2e-76	289	2320	M
NorthernBobwhite_ScaffoldedDeNovo_contig_136690	gi|358485511|ref|NC_006088.3 | GGA1	91.34	127	11	0	97	223	3052884	3053010	2e-43	179	1252	M
NorthernBobwhite_ScaffoldedDeNovo_contig_153665	gi|358485511|ref|NC_006088.3 | GGA1	77.15	337	52	5	5	321	3053086	3052755	1e-67	260	1415	M
NorthernBobwhite_ScaffoldedDeNovo_contig_67173	gi|358485511|ref|NC_006088.3 | GGA1	80.71	819	109	15	142	919	3053559	3054369	0	742	611	M
NorthernBobwhite_ScaffoldedDeNovo_contig_179423	gi|358485511|ref|NC_006088.3 | GGA1	84.1	346	34	4	2	330	3054436	3054777	4e-103	378	1	S
NorthernBobwhite_ScaffoldedDeNovo_contig_163788	gi|358485511|ref|NC_006088.3 | GGA1	81.63	441	77	1	1	441	3054753	3055189	2e-118	430	27	M
NorthernBobwhite_ScaffoldedDeNovo_contig_128971	gi|358485511|ref|NC_006088.3 | GGA1	80.36	443	81	1	292	734	3055189	3054753	6e-112	408	39	M
NorthernBobwhite_ScaffoldedDeNovo_contig_92788	gi|358485511|ref|NC_006088.3 | GGA1	75.97	308	45	4	2	282	3058024	3058329	2e-58	230	2	S
NorthernBobwhite_ScaffoldedDeNovo_contig_83709	gi|358485511|ref|NC_006088.3 | GGA1	78.5	307	46	4	172	459	3058329	3058024	2e-66	257	2	S
NorthernBobwhite_ScaffoldedDeNovo_contig_196688	gi|358485511|ref|NC_006088.3 | GGA1	78.21	78	14	2	948	1024	3058334	3058409	2e-06	59	139	M
NorthernBobwhite_ScaffoldedDeNovo_contig_211248	gi|358485511|ref|NC_006088.3 | GGA1	85.42	48	6	1	185	231	3058389	3058342	0.0001	51.8	24	M
NorthernBobwhite_ScaffoldedDeNovo_contig_167301	gi|358485511|ref|NC_006088.3 | GGA1	77.46	71	13	2	221	291	3058453	3058386	0.0005	50	35	M
NorthernBobwhite_ScaffoldedDeNovo_contig_49777	gi|358485511|ref|NC_006088.3 | GGA1	82.65	4593	590	63	7742	12201	3063158	3058640	0	4592	6373	M
NorthernBobwhite_ScaffoldedDeNovo_contig_95669	gi|358485511|ref|NC_006088.3 | GGA1	84.97	479	59	5	147	619	3063639	3063168	2e-148	529	1	S
NorthernBobwhite_ScaffoldedDeNovo_contig_82033	gi|358485511|ref|NC_006088.3 | GGA1	84.82	1008	98	13	1	994	3064671	3063705	0	1119	1	S
NorthernBobwhite_ScaffoldedDeNovo_contig_33751	gi|358485511|ref|NC_006088.3 | GGA1	83.85	3090	383	23	1651	4657	3074650	3077706	0	3324	4	S
NorthernBobwhite_ScaffoldedDeNovo_contig_113050	gi|358485511|ref|NC_006088.3 | GGA1	82.9	579	78	6	108	677	3083146	3083712	8e-167	590	1	S
NorthernBobwhite_ScaffoldedDeNovo_contig_11645	gi|358485511|ref|NC_006088.3 | GGA1	84.67	7665	820	85	5111	12547	3088864	3096401	0	8462	39699	M
NorthernBobwhite_ScaffoldedDeNovo_contig_205458	gi|358485511|ref|NC_006088.3 | GGA1	80.58	345	39	9	1	343	3116985	3117303	2e-81	306	1	S
NorthernBobwhite_ScaffoldedDeNovo_contig_17941	gi|358485511|ref|NC_006088.3 | GGA1	78.83	4984	683	77	4213	8991	3128625	3123809	0	4221	6	S
NorthernBobwhite_ScaffoldedDeNovo_contig_115508	gi|358485511|ref|NC_006088.3 | GGA1	72.52	393	54	8	24	404	3134510	3134160	4e-60	235	1	S
NorthernBobwhite_ScaffoldedDeNovo_contig_114857	gi|358485511|ref|NC_006088.3 | GGA1	69.53	791	95	24	208	875	3134714	3135481	3e-98	363	1	S
NorthernBobwhite_ScaffoldedDeNovo_contig_22397	gi|358485511|ref|NC_006088.3 | GGA1	88.8	7162	633	40	3	7054	3146490	3139388	0	9272	4	S
NorthernBobwhite_ScaffoldedDeNovo_contig_100471	gi|358485511|ref|NC_006088.3 | GGA1	87.67	219	23	1	420	638	3147408	3147194	4e-71	273	2491	M
NorthernBobwhite_ScaffoldedDeNovo_contig_145408	gi|358485511|ref|NC_006088.3 | GGA1	84.25	273	35	4	66	336	3148012	3148278	6e-76	288	6179	M
NorthernBobwhite_ScaffoldedDeNovo_contig_3398	gi|358485511|ref|NC_006088.3 | GGA1	85.41	3530	321	32	4782	8172	3152478	3155952	0	4075	28306	M
NorthernBobwhite_ScaffoldedDeNovo_contig_30008	gi|358485511|ref|NC_006088.3 | GGA1	84.97	346	44	4	1	342	3162206	3162547	1e-103	379	1	S
NorthernBobwhite_ScaffoldedDeNovo_contig_214696	gi|358485511|ref|NC_006088.3 | GGA1	72.41	203	32	3	136	328	3164345	3164533	5e-26	122	1489	M
NorthernBobwhite_ScaffoldedDeNovo_contig_145465	gi|358485511|ref|NC_006088.3 | GGA1	72.41	203	32	3	3	195	3164533	3164345	5e-26	122	2183	M
NorthernBobwhite_ScaffoldedDeNovo_contig_192110	gi|358485511|ref|NC_006088.3 | GGA1	90	30	3	0	479	508	3176385	3176414	0.38	41	17	M
NorthernBobwhite_ScaffoldedDeNovo_contig_42648	gi|358485511|ref|NC_006088.3 | GGA1	84.79	1289	150	6	5	1279	3176472	3177728	0	1456	1	S
NorthernBobwhite_ScaffoldedDeNovo_contig_213031	gi|358485511|ref|NC_006088.3 | GGA1	86.32	307	32	1	10	306	3178348	3178042	2e-100	369	1	S
NorthernBobwhite_ScaffoldedDeNovo_contig_77877	gi|358485511|ref|NC_006088.3 | GGA1	87.64	1052	114	8	749	1794	3182525	3181484	0	1290	39150	M
NorthernBobwhite_ScaffoldedDeNovo_contig_92982	gi|358485511|ref|NC_006088.3 | GGA1	77.54	285	60	2	21	301	3183272	3183556	7e-56	221	5626	M
NorthernBobwhite_ScaffoldedDeNovo_contig_67637	gi|358485511|ref|NC_006088.3 | GGA1	81.09	238	45	0	74	311	3183274	3183511	2e-57	226	8485	M
NorthernBobwhite_ScaffoldedDeNovo_contig_8355	gi|358485511|ref|NC_006088.3 | GGA1	87.84	6974	600	42	2070	8927	3188730	3195571	0	8789	34958	M
NorthernBobwhite_ScaffoldedDeNovo_contig_97781	gi|358485511|ref|NC_006088.3 | GGA1	80.42	996	125	17	181	1117	3200419	3199435	0	904	2599	M
NorthernBobwhite_ScaffoldedDeNovo_contig_85922	gi|358485511|ref|NC_006088.3 | GGA1	80.84	574	63	5	1	528	3201357	3201929	1e-157	560	14	M
NorthernBobwhite_ScaffoldedDeNovo_contig_108397	gi|358485511|ref|NC_006088.3 | GGA1	100	23	0	0	239	261	3204473	3204451	0.04	42.8	49	M
NorthernBobwhite_ScaffoldedDeNovo_contig_66713	gi|358485511|ref|NC_006088.3 | GGA1	84.44	45	5	1	241	285	3206375	3206333	0.001	48.2	79	M
NorthernBobwhite_ScaffoldedDeNovo_contig_148330	gi|358485511|ref|NC_006088.3 | GGA1	82.31	407	30	7	1	389	3206733	3207115	2e-114	416	1	S
NorthernBobwhite_ScaffoldedDeNovo_contig_216691	gi|358485511|ref|NC_006088.3 | GGA1	88.89	36	4	0	180	215	3208359	3208324	0.001	48.2	74	M
NorthernBobwhite_ScaffoldedDeNovo_contig_19920	gi|358485511|ref|NC_006088.3 | GGA1	78.4	8187	1230	139	7378	15200	3217369	3225381	0	6652	8979	M
NorthernBobwhite_ScaffoldedDeNovo_contig_174280	gi|358485511|ref|NC_006088.3 | GGA1	82.13	621	83	9	27	640	3229877	3229278	4e-171	605	1	S
NorthernBobwhite_ScaffoldedDeNovo_contig_207725	gi|358485511|ref|NC_006088.3 | GGA1	77.33	419	65	7	28	417	3229903	3230320	1e-86	324	1	S
NorthernBobwhite_ScaffoldedDeNovo_contig_116523	gi|358485511|ref|NC_006088.3 | GGA1	78.52	419	63	6	1	393	3230320	3229903	1e-93	347	1	S
NorthernBobwhite_ScaffoldedDeNovo_contig_36302	gi|358485511|ref|NC_006088.3 | GGA1	83.93	224	30	4	49	269	3234590	3234810	2e-58	230	1	S
NorthernBobwhite_ScaffoldedDeNovo_contig_136824	gi|358485511|ref|NC_006088.3 | GGA1	85.29	34	5	0	279	312	3242404	3242371	0.77	39.2	22	M
NorthernBobwhite_ScaffoldedDeNovo_contig_136439	gi|358485511|ref|NC_006088.3 | GGA1	76.57	414	62	5	1	379	3248218	3248631	4e-85	318	1	S
NorthernBobwhite_ScaffoldedDeNovo_contig_136440	gi|358485511|ref|NC_006088.3 | GGA1	76.81	414	61	5	1	379	3248218	3248631	1e-86	324	1	S
NorthernBobwhite_ScaffoldedDeNovo_contig_14529	gi|358485511|ref|NC_006088.3 | GGA1	78.51	4458	623	79	8106	12409	3252882	3248606	0	3667	14882	M
NorthernBobwhite_ScaffoldedDeNovo_contig_59084	gi|358485511|ref|NC_006088.3 | GGA1	82.52	326	48	3	1	317	3256148	3256473	2e-87	325	1	S
NorthernBobwhite_ScaffoldedDeNovo_contig_59085	gi|358485511|ref|NC_006088.3 | GGA1	82.26	327	48	4	1	318	3256148	3256473	1e-85	320	1	S
NorthernBobwhite_ScaffoldedDeNovo_contig_102028	gi|358485511|ref|NC_006088.3 | GGA1	82.94	1020	129	13	1	1011	3256448	3257431	0	1038	1	S
NorthernBobwhite_ScaffoldedDeNovo_contig_129014	gi|358485511|ref|NC_006088.3 | GGA1	83.71	307	41	4	17	318	3261964	3261662	4e-85	318	1	S
NorthernBobwhite_ScaffoldedDeNovo_contig_133422	gi|358485511|ref|NC_006088.3 | GGA1	81.86	408	64	5	2	402	3285789	3286193	3e-106	389	1	S
NorthernBobwhite_ScaffoldedDeNovo_contig_18488	gi|358485511|ref|NC_006088.3 | GGA1	84.07	4965	547	60	9108	13895	3285811	3280914	0	5337	14	S
NorthernBobwhite_ScaffoldedDeNovo_contig_193039	gi|358485511|ref|NC_006088.3 | GGA1	82.6	408	58	5	2	399	3286193	3285789	4e-111	405	1	S
NorthernBobwhite_ScaffoldedDeNovo_contig_141159	gi|358485511|ref|NC_006088.3 | GGA1	85.54	484	57	4	5	487	3292409	3292880	5e-155	551	1	S
NorthernBobwhite_ScaffoldedDeNovo_contig_166408	gi|358485511|ref|NC_006088.3 | GGA1	90.77	325	27	2	1	325	3293495	3293174	6e-123	444	2	S
NorthernBobwhite_ScaffoldedDeNovo_contig_13560	gi|358485511|ref|NC_006088.3 | GGA1	84.03	6886	753	82	1435	8113	3295803	3302548	0	7402	2	S
NorthernBobwhite_ScaffoldedDeNovo_contig_4877	gi|358485511|ref|NC_006088.3 | GGA1	81.8	6312	809	93	5401	11471	3307658	3313870	0	6091	17003	M
NorthernBobwhite_ScaffoldedDeNovo_contig_182788	gi|358485511|ref|NC_006088.3 | GGA1	78.82	321	63	4	4	323	3320959	3320643	3e-67	259	5880	M
NorthernBobwhite_ScaffoldedDeNovo_contig_202415	gi|358485511|ref|NC_006088.3 | GGA1	78.72	390	73	5	4	393	3320959	3320580	1e-85	320	6396	M
NorthernBobwhite_ScaffoldedDeNovo_contig_11055	gi|358485511|ref|NC_006088.3 | GGA1	86.79	3013	289	25	9890	12843	3326889	3329851	0	3626	13852	M
NorthernBobwhite_ScaffoldedDeNovo_contig_55126	gi|358485511|ref|NC_006088.3 | GGA1	87.65	340	25	4	11	335	3336989	3337326	4e-116	421	1	S
NorthernBobwhite_ScaffoldedDeNovo_contig_55127	gi|358485511|ref|NC_006088.3 | GGA1	87.61	339	26	3	11	334	3336989	3337326	1e-116	423	1	S
NorthernBobwhite_ScaffoldedDeNovo_contig_167811	gi|358485511|ref|NC_006088.3 | GGA1	86.36	220	23	2	24	237	3342425	3342207	5e-67	259	2	S
NorthernBobwhite_ScaffoldedDeNovo_contig_122907	gi|358485511|ref|NC_006088.3 | GGA1	80.71	451	67	3	1	439	3356007	3356449	2e-117	426	2127	M
NorthernBobwhite_ScaffoldedDeNovo_contig_165338	gi|358485511|ref|NC_006088.3 | GGA1	88.59	333	38	0	1	333	3362180	3362512	8e-119	430	7	M
NorthernBobwhite_ScaffoldedDeNovo_contig_152333	gi|358485511|ref|NC_006088.3 | GGA1	88.89	333	37	0	1	333	3362512	3362180	7e-120	434	3	M
NorthernBobwhite_ScaffoldedDeNovo_contig_211520	gi|358485511|ref|NC_006088.3 | GGA1	80.39	51	9	1	126	175	3375578	3375528	0.011	44.6	20	M
NorthernBobwhite_ScaffoldedDeNovo_contig_73379	gi|358485511|ref|NC_006088.3 | GGA1	84.53	362	36	5	315	667	3376205	3376555	4e-108	396	6683	M
NorthernBobwhite_ScaffoldedDeNovo_contig_139644	gi|358485511|ref|NC_006088.3 | GGA1	83.52	449	57	5	1	435	3385584	3385139	1e-130	470	1	S
NorthernBobwhite_ScaffoldedDeNovo_contig_137433	gi|358485511|ref|NC_006088.3 | GGA1	88.24	391	39	4	6	390	3395297	3394908	2e-135	486	1	S
NorthernBobwhite_ScaffoldedDeNovo_contig_81970	gi|358485511|ref|NC_006088.3 | GGA1	80.5	400	49	4	1	371	3396036	3395637	5e-103	378	1	S
NorthernBobwhite_ScaffoldedDeNovo_contig_195630	gi|358485511|ref|NC_006088.3 | GGA1	87.25	306	30	4	1	302	3396089	3396389	7e-100	367	6439	M
NorthernBobwhite_ScaffoldedDeNovo_contig_162085	gi|358485511|ref|NC_006088.3 | GGA1	88.2	305	27	4	1	301	3396090	3396389	4e-103	378	4241	M
NorthernBobwhite_ScaffoldedDeNovo_contig_5613	gi|358485511|ref|NC_006088.3 | GGA1	84.4	8863	1017	86	11177	19782	3408256	3399503	0	9690	48324	M
NorthernBobwhite_ScaffoldedDeNovo_contig_209197	gi|358485511|ref|NC_006088.3 | GGA1	79.77	435	71	7	28	452	3417356	3417783	3e-101	372	1	S
NorthernBobwhite_ScaffoldedDeNovo_contig_191118	gi|358485511|ref|NC_006088.3 | GGA1	82.8	378	54	4	37	404	3417731	3417355	5e-104	381	1	S
NorthernBobwhite_ScaffoldedDeNovo_contig_21245	gi|358485511|ref|NC_006088.3 | GGA1	83.1	11243	1179	148	22689	33498	3428791	3417837	0	11690	10821	M
NorthernBobwhite_ScaffoldedDeNovo_contig_108448	gi|358485511|ref|NC_006088.3 | GGA1	85.78	640	51	9	1	618	3432015	3432636	0	740	1	S
NorthernBobwhite_ScaffoldedDeNovo_contig_33628	gi|358485511|ref|NC_006088.3 | GGA1	84.49	1077	124	10	1	1050	3437751	3438811	0	1184	2793	M
NorthernBobwhite_ScaffoldedDeNovo_contig_163614	gi|358485511|ref|NC_006088.3 | GGA1	83.33	48	6	2	366	412	3438205	3438251	0.021	44.6	34	M
NorthernBobwhite_ScaffoldedDeNovo_contig_118469	gi|358485511|ref|NC_006088.3 | GGA1	87.97	349	41	1	1	349	3447844	3448191	6e-121	437	1	S
NorthernBobwhite_ScaffoldedDeNovo_contig_102949	gi|358485511|ref|NC_006088.3 | GGA1	88.25	349	40	1	1	349	3448191	3447844	5e-122	441	1	S
NorthernBobwhite_ScaffoldedDeNovo_contig_48031	gi|358485511|ref|NC_006088.3 | GGA1	84.5	2264	257	28	588	2788	3452572	3454804	0	2459	4	S
NorthernBobwhite_ScaffoldedDeNovo_contig_123090	gi|358485511|ref|NC_006088.3 | GGA1	77.78	63	10	2	267	329	3454859	3454917	0.003	46.4	486	M
NorthernBobwhite_ScaffoldedDeNovo_contig_11329	gi|358485511|ref|NC_006088.3 | GGA1	75.71	1630	200	44	5	1529	3456104	3457642	0	1133	3	S
NorthernBobwhite_ScaffoldedDeNovo_contig_106705	gi|358485511|ref|NC_006088.3 | GGA1	84.35	556	60	8	465	1018	3459701	3460231	2e-169	600	9232	M
NorthernBobwhite_ScaffoldedDeNovo_contig_35270	gi|358485511|ref|NC_006088.3 | GGA1	84.46	1654	205	11	8	1626	3462869	3461233	0	1822	2	M
NorthernBobwhite_ScaffoldedDeNovo_contig_218512	gi|358485511|ref|NC_006088.3 | GGA1	92.86	28	2	0	126	153	3476991	3476964	0.052	42.8	22	M
NorthernBobwhite_ScaffoldedDeNovo_contig_197315	gi|358485511|ref|NC_006088.3 | GGA1	82.3	322	36	5	1	316	3477043	3477349	1e-85	320	1	S
NorthernBobwhite_ScaffoldedDeNovo_contig_141838	gi|358485511|ref|NC_006088.3 | GGA1	69.66	89	26	1	294	382	3480356	3480269	7.3	35.6	1	S
NorthernBobwhite_ScaffoldedDeNovo_contig_5745	gi|358485511|ref|NC_006088.3 | GGA1	86.43	6502	679	48	13292	19657	3489857	3483423	0	7716	41001	M
NorthernBobwhite_ScaffoldedDeNovo_contig_153757	gi|358485511|ref|NC_006088.3 | GGA1	90.21	337	31	2	55	391	3519604	3519938	3e-125	452	11122	M
NorthernBobwhite_ScaffoldedDeNovo_contig_198938	gi|358485511|ref|NC_006088.3 | GGA1	89.35	310	32	1	1	310	3519630	3519938	9e-112	407	3905	M
NorthernBobwhite_ScaffoldedDeNovo_contig_110195	gi|358485511|ref|NC_006088.3 | GGA1	87.78	1555	154	9	1	1536	3521429	3522966	0	1939	1	S
NorthernBobwhite_ScaffoldedDeNovo_contig_158709	gi|358485511|ref|NC_006088.3 | GGA1	81.69	437	43	3	1	436	3524525	3524125	4e-124	448	1	S
NorthernBobwhite_ScaffoldedDeNovo_contig_19857	gi|358485511|ref|NC_006088.3 | GGA1	86.25	5351	544	42	2022	7258	3528904	3523632	0	6316	24842	M
NorthernBobwhite_ScaffoldedDeNovo_contig_83384	gi|358485511|ref|NC_006088.3 | GGA1	81.65	278	36	5	5153	5416	3535060	3535336	4e-67	262	2	S
NorthernBobwhite_ScaffoldedDeNovo_contig_116585	gi|358485511|ref|NC_006088.3 | GGA1	74.73	467	93	9	1	448	3539781	3540241	2e-77	293	1224	M
NorthernBobwhite_ScaffoldedDeNovo_contig_116584	gi|358485511|ref|NC_006088.3 | GGA1	74.57	464	94	8	1	445	3539783	3540241	7e-77	291	1138	M
NorthernBobwhite_ScaffoldedDeNovo_contig_146292	gi|358485511|ref|NC_006088.3 | GGA1	74.51	459	74	9	71	489	3539935	3540390	4e-81	306	3879	M
NorthernBobwhite_ScaffoldedDeNovo_contig_146545	gi|358485511|ref|NC_006088.3 | GGA1	79.88	512	91	1	125	624	3540093	3540604	2e-129	466	6397	M
NorthernBobwhite_ScaffoldedDeNovo_contig_162267	gi|358485511|ref|NC_006088.3 | GGA1	75.33	454	88	5	5	434	3540108	3540561	2e-83	313	2872	M
NorthernBobwhite_ScaffoldedDeNovo_contig_70241	gi|358485511|ref|NC_006088.3 | GGA1	83.5	406	63	2	1	406	3540111	3540512	7e-117	425	7593	M
NorthernBobwhite_ScaffoldedDeNovo_contig_40125	gi|358485511|ref|NC_006088.3 | GGA1	80.9	487	91	2	1	487	3540213	3540697	4e-125	452	11979	M
NorthernBobwhite_ScaffoldedDeNovo_contig_72440	gi|358485511|ref|NC_006088.3 | GGA1	84.13	460	72	1	115	573	3540317	3539858	1e-138	497	8016	M
NorthernBobwhite_ScaffoldedDeNovo_contig_48489	gi|358485511|ref|NC_006088.3 | GGA1	76.2	664	134	9	6	654	3540479	3539825	3e-129	466	4358	M
NorthernBobwhite_ScaffoldedDeNovo_contig_67766	gi|358485511|ref|NC_006088.3 | GGA1	80.49	369	61	2	3	360	3540558	3540190	4e-92	342	4165	M
NorthernBobwhite_ScaffoldedDeNovo_contig_177596	gi|358485511|ref|NC_006088.3 | GGA1	78.69	366	51	2	1	339	3540574	3540209	9e-87	324	5003	M
NorthernBobwhite_ScaffoldedDeNovo_contig_131417	gi|358485511|ref|NC_006088.3 | GGA1	87.9	124	15	0	296	419	3555892	3555769	3e-36	156	26	M
NorthernBobwhite_ScaffoldedDeNovo_contig_63006	gi|358485511|ref|NC_006088.3 | GGA1	87.9	124	15	0	310	433	3555892	3555769	4e-36	156	43	M
NorthernBobwhite_ScaffoldedDeNovo_contig_104915	gi|358485511|ref|NC_006088.3 | GGA1	89.16	83	7	1	308	388	3564288	3564370	1e-21	107	1	S
NorthernBobwhite_ScaffoldedDeNovo_contig_140654	gi|358485511|ref|NC_006088.3 | GGA1	82.65	415	62	5	3	410	3565640	3565229	1e-112	410	11885	M
NorthernBobwhite_ScaffoldedDeNovo_contig_140653	gi|358485511|ref|NC_006088.3 | GGA1	82.49	417	63	5	1	409	3565643	3565229	1e-112	410	13434	M
NorthernBobwhite_ScaffoldedDeNovo_contig_170118	gi|358485511|ref|NC_006088.3 | GGA1	76.11	339	49	3	1	307	3570074	3570412	2e-68	262	1	S
NorthernBobwhite_ScaffoldedDeNovo_contig_7188	gi|358485511|ref|NC_006088.3 | GGA1	86.06	4526	493	34	5800	10231	3570099	3565618	0	5303	80238	M
NorthernBobwhite_ScaffoldedDeNovo_contig_167640	gi|358485511|ref|NC_006088.3 | GGA1	74.35	538	78	8	6	488	3570606	3570074	1e-99	367	1	S
NorthernBobwhite_ScaffoldedDeNovo_contig_86490	gi|358485511|ref|NC_006088.3 | GGA1	82.94	1694	180	23	1	1626	3581017	3582669	0	1746	9	M
NorthernBobwhite_ScaffoldedDeNovo_contig_9786	gi|358485511|ref|NC_006088.3 | GGA1	85.9	8742	946	83	5702	14272	3588695	3597320	0	10090	31430	M
NorthernBobwhite_ScaffoldedDeNovo_contig_119941	gi|358485511|ref|NC_006088.3 | GGA1	90.48	126	12	0	276	401	3597662	3597787	1e-41	174	1092	M
NorthernBobwhite_ScaffoldedDeNovo_contig_178884	gi|358485511|ref|NC_006088.3 | GGA1	91.4	93	6	1	1	91	3597681	3597773	4e-28	129	166	M
NorthernBobwhite_ScaffoldedDeNovo_contig_130257	gi|358485511|ref|NC_006088.3 | GGA1	86.96	184	24	0	180	363	3597825	3597642	7e-57	224	2344	M
NorthernBobwhite_ScaffoldedDeNovo_contig_108589	gi|358485511|ref|NC_006088.3 | GGA1	70.38	287	74	7	80	360	3597828	3597547	3e-23	113	2	S
NorthernBobwhite_ScaffoldedDeNovo_contig_44095	gi|358485511|ref|NC_006088.3 | GGA1	86.17	1323	160	8	2618	3932	3601933	3600626	0	1546	915	M
NorthernBobwhite_ScaffoldedDeNovo_contig_57527	gi|358485511|ref|NC_006088.3 | GGA1	80.35	341	52	6	1	337	3602498	3602169	1e-79	300	1	S
NorthernBobwhite_ScaffoldedDeNovo_contig_133299	gi|358485511|ref|NC_006088.3 | GGA1	82.22	180	31	1	156	334	3608055	3607876	1e-42	178	1347	M
NorthernBobwhite_ScaffoldedDeNovo_contig_13528	gi|358485511|ref|NC_006088.3 | GGA1	84.67	2094	220	18	5438	7475	3610109	3612157	0	2340	14943	M
NorthernBobwhite_ScaffoldedDeNovo_contig_122169	gi|358485511|ref|NC_006088.3 | GGA1	88.89	36	3	1	1234	1269	3615913	3615879	0.055	44.6	23	M
NorthernBobwhite_ScaffoldedDeNovo_contig_96077	gi|358485511|ref|NC_006088.3 | GGA1	81.74	586	79	7	1	560	3617563	3616980	2e-160	569	1	S
NorthernBobwhite_ScaffoldedDeNovo_contig_98697	gi|358485511|ref|NC_006088.3 | GGA1	84.42	321	30	2	1	304	3621593	3621276	9e-99	363	1	S
NorthernBobwhite_ScaffoldedDeNovo_contig_50953	gi|358485511|ref|NC_006088.3 | GGA1	85.05	107	16	0	101	207	3633823	3633929	1e-25	122	26	M
NorthernBobwhite_ScaffoldedDeNovo_contig_92128	gi|358485511|ref|NC_006088.3 | GGA1	82.42	694	78	8	2	654	3634191	3634881	0	706	1	S
NorthernBobwhite_ScaffoldedDeNovo_contig_148437	gi|358485511|ref|NC_006088.3 | GGA1	80.72	612	74	8	1	571	3634799	3634191	2e-162	576	1	S
NorthernBobwhite_ScaffoldedDeNovo_contig_8282	gi|358485511|ref|NC_006088.3 | GGA1	83.17	5513	675	58	1	5389	3640412	3635029	0	5725	31169	M
NorthernBobwhite_ScaffoldedDeNovo_contig_50938	gi|358485511|ref|NC_006088.3 | GGA1	87.36	957	106	7	1	952	3641433	3640487	0	1162	1	S
NorthernBobwhite_ScaffoldedDeNovo_contig_83934	gi|358485511|ref|NC_006088.3 | GGA1	79	419	72	4	22	426	3644480	3644064	2e-96	356	278	M
NorthernBobwhite_ScaffoldedDeNovo_contig_30275	gi|358485511|ref|NC_006088.3 | GGA1	86.11	1152	120	9	1	1128	3654666	3653531	0	1352	2692	M
NorthernBobwhite_ScaffoldedDeNovo_contig_147685	gi|358485511|ref|NC_006088.3 | GGA1	84.94	538	68	4	1	531	3659158	3658627	1e-169	600	1	S
NorthernBobwhite_ScaffoldedDeNovo_contig_59773	gi|358485511|ref|NC_006088.3 | GGA1	82.93	955	127	11	1	920	3660446	3659493	0	982	13023	M
NorthernBobwhite_ScaffoldedDeNovo_contig_138254	gi|358485511|ref|NC_006088.3 | GGA1	84.25	381	49	1	38	418	3663961	3664330	2e-116	423	549	M
NorthernBobwhite_ScaffoldedDeNovo_contig_58267	gi|358485511|ref|NC_006088.3 | GGA1	86.96	782	75	6	1	758	3665362	3664584	0	948	1	S
NorthernBobwhite_ScaffoldedDeNovo_contig_194376	gi|358485511|ref|NC_006088.3 | GGA1	76.67	60	14	0	205	264	3675886	3675827	0.003	46.4	65	M
NorthernBobwhite_ScaffoldedDeNovo_contig_1373	gi|358485511|ref|NC_006088.3 | GGA1	85.39	6306	675	50	6	6145	3726472	3720247	0	7216	127790	M
NorthernBobwhite_ScaffoldedDeNovo_contig_97583	gi|358485511|ref|NC_006088.3 | GGA1	88.61	553	63	0	1	553	3727079	3726527	0	713	1	S
NorthernBobwhite_ScaffoldedDeNovo_contig_200354	gi|358485511|ref|NC_006088.3 | GGA1	94.25	313	15	1	2	314	3727390	3727081	1e-134	482	1	S
NorthernBobwhite_ScaffoldedDeNovo_contig_153147	gi|358485511|ref|NC_006088.3 | GGA1	86.18	152	17	2	527	674	3729226	3729377	2e-41	174	1	S
NorthernBobwhite_ScaffoldedDeNovo_contig_97669	gi|358485511|ref|NC_006088.3 | GGA1	86.63	516	49	6	1	509	3729893	3729391	7e-173	610	1	S
NorthernBobwhite_ScaffoldedDeNovo_contig_81870	gi|358485511|ref|NC_006088.3 | GGA1	83.5	3533	354	29	3	3338	3730473	3733973	0	3819	8393	M
NorthernBobwhite_ScaffoldedDeNovo_contig_106549	gi|358485511|ref|NC_006088.3 | GGA1	93.68	443	25	2	2	442	3730488	3730047	0	666	1	S
NorthernBobwhite_ScaffoldedDeNovo_contig_210179	gi|358485511|ref|NC_006088.3 | GGA1	82.49	337	37	4	2	326	3734777	3734451	9e-93	343	1	S
NorthernBobwhite_ScaffoldedDeNovo_contig_78068	gi|358485511|ref|NC_006088.3 | GGA1	83.69	331	49	2	1	328	3744516	3744188	3e-94	349	1128	M
NorthernBobwhite_ScaffoldedDeNovo_contig_556	gi|358485511|ref|NC_006088.3 | GGA1	84.24	5597	623	45	11760	17270	3755549	3760972	0	6148	27836	M
NorthernBobwhite_ScaffoldedDeNovo_contig_99790	gi|358485511|ref|NC_006088.3 | GGA1	87.78	1767	170	12	8	1748	3764246	3762500	0	2201	1	S
NorthernBobwhite_ScaffoldedDeNovo_contig_106453	gi|358485511|ref|NC_006088.3 | GGA1	71.68	784	162	21	2	761	3769407	3768660	5e-101	372	3388	M
NorthernBobwhite_ScaffoldedDeNovo_contig_33925	gi|358485511|ref|NC_006088.3 | GGA1	78.81	604	112	5	929	1530	3774354	3774943	2e-140	504	91	M
NorthernBobwhite_ScaffoldedDeNovo_contig_15377	gi|358485511|ref|NC_006088.3 | GGA1	75.71	704	105	9	533	1174	3777093	3777792	2e-144	518	831	M
NorthernBobwhite_ScaffoldedDeNovo_contig_48983	gi|358485511|ref|NC_006088.3 | GGA1	72.93	229	49	5	181	401	3777166	3776943	3e-26	123	27	M
NorthernBobwhite_ScaffoldedDeNovo_contig_2406	gi|358485511|ref|NC_006088.3 | GGA1	75.44	745	132	11	521	1251	3778924	3778217	1e-143	515	98	M
NorthernBobwhite_ScaffoldedDeNovo_contig_3031	gi|358485511|ref|NC_006088.3 | GGA1	78.99	257	46	3	287	543	3782536	3782784	3e-53	214	2	S
NorthernBobwhite_ScaffoldedDeNovo_contig_2405	gi|358485511|ref|NC_006088.3 | GGA1	85.24	210	25	3	5326	5531	3783045	3783252	8e-58	232	108	M
NorthernBobwhite_ScaffoldedDeNovo_contig_112129	gi|358485511|ref|NC_006088.3 | GGA1	82.23	197	26	3	2	198	3783068	3782881	4e-47	192	2	S
NorthernBobwhite_ScaffoldedDeNovo_contig_68526	gi|358485511|ref|NC_006088.3 | GGA1	82.1	1961	264	16	272	2157	3786960	3785012	0	1961	1	S
NorthernBobwhite_ScaffoldedDeNovo_contig_12850	gi|358485511|ref|NC_006088.3 | GGA1	85.95	3510	344	29	2438	5863	3795912	3792468	0	4111	20146	M
NorthernBobwhite_ScaffoldedDeNovo_contig_74871	gi|358485511|ref|NC_006088.3 | GGA1	82.77	296	50	1	5	299	3798148	3797853	9e-80	300	1	S
NorthernBobwhite_ScaffoldedDeNovo_contig_74628	gi|358485511|ref|NC_006088.3 | GGA1	84.9	245	23	3	19	251	3798161	3798403	4e-72	275	1	S
NorthernBobwhite_ScaffoldedDeNovo_contig_105382	gi|358485511|ref|NC_006088.3 | GGA1	82.9	497	58	11	1	489	3799855	3799378	5e-136	488	1	S
NorthernBobwhite_ScaffoldedDeNovo_contig_89782	gi|358485511|ref|NC_006088.3 | GGA1	83	247	34	2	346	584	3800579	3800333	7e-66	255	2	S
NorthernBobwhite_ScaffoldedDeNovo_contig_81241	gi|358485511|ref|NC_006088.3 | GGA1	85.33	184	26	1	271	453	3801444	3801627	2e-51	206	2	S
NorthernBobwhite_ScaffoldedDeNovo_contig_34231	gi|358485511|ref|NC_006088.3 | GGA1	86.57	432	39	2	1	413	3803356	3803787	2e-147	526	1	S
NorthernBobwhite_ScaffoldedDeNovo_contig_39457	gi|358485511|ref|NC_006088.3 | GGA1	81.97	427	52	8	1	412	3804401	3803985	1e-112	410	1	S
NorthernBobwhite_ScaffoldedDeNovo_contig_39458	gi|358485511|ref|NC_006088.3 | GGA1	85.08	181	25	1	254	434	3805887	3806065	3e-50	203	2	S
NorthernBobwhite_ScaffoldedDeNovo_contig_76577	gi|358485511|ref|NC_006088.3 | GGA1	87.73	326	34	2	1	320	3806692	3806367	3e-111	405	2	M
NorthernBobwhite_ScaffoldedDeNovo_contig_118628	gi|358485511|ref|NC_006088.3 | GGA1	88.69	628	53	4	2	613	3807658	3807033	0	810	2	S
NorthernBobwhite_ScaffoldedDeNovo_contig_76559	gi|358485511|ref|NC_006088.3 | GGA1	85.71	84	10	2	397	478	3813018	3813101	1e-16	91.5	23094	M
NorthernBobwhite_ScaffoldedDeNovo_contig_174357	gi|358485511|ref|NC_006088.3 | GGA1	83.67	49	8	0	5	53	3818046	3818094	0.0007	53.6	56	M
NorthernBobwhite_ScaffoldedDeNovo_contig_76846	gi|358485511|ref|NC_006088.3 | GGA1	74.44	90	17	2	5961	6044	3818046	3818135	0.0003	55.4	153	M
NorthernBobwhite_ScaffoldedDeNovo_contig_155099	gi|358485511|ref|NC_006088.3 | GGA1	75	92	20	2	456	546	3818047	3818136	5e-06	57.2	62	M
NorthernBobwhite_ScaffoldedDeNovo_contig_214750	gi|358485511|ref|NC_006088.3 | GGA1	87.18	39	5	0	156	194	3818071	3818109	0.001	48.2	325	M
NorthernBobwhite_ScaffoldedDeNovo_contig_217556	gi|358485511|ref|NC_006088.3 | GGA1	93.1	29	2	0	339	367	3818080	3818052	0.014	44.6	242	M
NorthernBobwhite_ScaffoldedDeNovo_contig_100544	gi|358485511|ref|NC_006088.3 | GGA1	89.55	287	17	2	5144	5418	3825574	3825289	6e-104	385	2	S
NorthernBobwhite_ScaffoldedDeNovo_contig_134647	gi|358485511|ref|NC_006088.3 | GGA1	84.52	478	56	8	1	466	3826020	3825549	2e-142	509	1	S
NorthernBobwhite_ScaffoldedDeNovo_contig_175908	gi|358485511|ref|NC_006088.3 | GGA1	83.26	478	58	8	1	462	3826020	3825549	2e-135	486	1	S
NorthernBobwhite_ScaffoldedDeNovo_contig_13095	gi|358485511|ref|NC_006088.3 | GGA1	90.21	562	49	2	1	559	3826553	3825995	0	762	1	S
NorthernBobwhite_ScaffoldedDeNovo_contig_209674	gi|358485511|ref|NC_006088.3 | GGA1	83.78	37	3	1	157	190	3830367	3830403	0.5	39.2	3	M
NorthernBobwhite_ScaffoldedDeNovo_contig_16345	gi|358485511|ref|NC_006088.3 | GGA1	85.47	6509	684	64	29135	35472	3831981	3838398	0	7422	17853	M
NorthernBobwhite_ScaffoldedDeNovo_contig_164004	gi|358485511|ref|NC_006088.3 | GGA1	84.05	351	46	3	1	341	3841236	3841586	2e-102	376	1	S
NorthernBobwhite_ScaffoldedDeNovo_contig_96263	gi|358485511|ref|NC_006088.3 | GGA1	80.05	812	88	12	1	756	3845364	3844571	0	747	3	S
NorthernBobwhite_ScaffoldedDeNovo_contig_170463	gi|358485511|ref|NC_006088.3 | GGA1	81.32	423	53	5	7	404	3851433	3851012	3e-112	408	1474	M
NorthernBobwhite_ScaffoldedDeNovo_contig_170464	gi|358485511|ref|NC_006088.3 | GGA1	81.8	423	51	5	7	404	3851433	3851012	6e-115	417	1465	M
NorthernBobwhite_ScaffoldedDeNovo_contig_2811	gi|358485511|ref|NC_006088.3 | GGA1	83.2	7422	833	91	11796	18984	3860984	3853744	0	7726	16348	M
NorthernBobwhite_ScaffoldedDeNovo_contig_179505	gi|358485511|ref|NC_006088.3 | GGA1	94.34	106	6	0	1	106	3868292	3868397	5e-39	165	1	S
NorthernBobwhite_ScaffoldedDeNovo_contig_187830	gi|358485511|ref|NC_006088.3 | GGA1	95.28	106	5	0	220	325	3868397	3868292	4e-40	168	1	S
NorthernBobwhite_ScaffoldedDeNovo_contig_141717	gi|358485511|ref|NC_006088.3 | GGA1	100	27	0	0	135	161	3872601	3872627	0.0004	50	94	M
NorthernBobwhite_ScaffoldedDeNovo_contig_139083	gi|358485511|ref|NC_006088.3 | GGA1	87.45	263	33	0	4	266	3872602	3872340	4e-87	325	1	S
NorthernBobwhite_ScaffoldedDeNovo_contig_117565	gi|358485511|ref|NC_006088.3 | GGA1	72.54	397	47	2	1	397	3873561	3873227	6e-71	271	1	S
NorthernBobwhite_ScaffoldedDeNovo_contig_97709	gi|358485511|ref|NC_006088.3 | GGA1	72.54	397	47	2	1	397	3873561	3873227	6e-71	271	1	S
NorthernBobwhite_ScaffoldedDeNovo_contig_35651	gi|358485511|ref|NC_006088.3 | GGA1	74.9	247	49	7	6	243	3876249	3876007	4e-33	147	398	M
NorthernBobwhite_ScaffoldedDeNovo_contig_156817	gi|358485511|ref|NC_006088.3 | GGA1	98.29	585	10	0	4	588	3883242	3883826	0	1011	1	S
NorthernBobwhite_ScaffoldedDeNovo_contig_34274	gi|358485511|ref|NC_006088.3 | GGA1	82.79	4405	508	51	7191	11502	3883255	3879008	0	4522	29501	M
NorthernBobwhite_ScaffoldedDeNovo_contig_77954	gi|358485511|ref|NC_006088.3 | GGA1	82.15	1098	133	11	1	1038	3889762	3890856	0	1104	1	S
NorthernBobwhite_ScaffoldedDeNovo_contig_51750	gi|358485511|ref|NC_006088.3 | GGA1	77.71	507	75	6	1	475	3894599	3894099	4e-113	412	12	M
NorthernBobwhite_ScaffoldedDeNovo_contig_163271	gi|358485511|ref|NC_006088.3 | GGA1	84.4	391	43	4	14	386	3897488	3897878	3e-118	428	1	S
NorthernBobwhite_ScaffoldedDeNovo_contig_183754	gi|358485511|ref|NC_006088.3 | GGA1	84.96	399	43	6	1	390	3897878	3897488	7e-121	437	1	S
NorthernBobwhite_ScaffoldedDeNovo_contig_211096	gi|358485511|ref|NC_006088.3 | GGA1	85.67	342	44	2	3	344	3905431	3905767	2e-107	392	1	S
NorthernBobwhite_ScaffoldedDeNovo_contig_198315	gi|358485511|ref|NC_006088.3 | GGA1	86.09	345	40	2	1	345	3905767	3905431	3e-111	405	1	S
NorthernBobwhite_ScaffoldedDeNovo_contig_133864	gi|358485511|ref|NC_006088.3 | GGA1	81.43	210	27	2	6	208	3906303	3906507	6e-51	205	2	S
NorthernBobwhite_ScaffoldedDeNovo_contig_198854	gi|358485511|ref|NC_006088.3 | GGA1	90.78	586	42	4	2	580	3906322	3905742	0	807	1	S
NorthernBobwhite_ScaffoldedDeNovo_contig_97565	gi|358485511|ref|NC_006088.3 | GGA1	76.67	210	24	3	154	343	3906507	3906303	2e-39	167	2	S
NorthernBobwhite_ScaffoldedDeNovo_contig_59663	gi|358485511|ref|NC_006088.3 | GGA1	82.87	572	65	9	8	563	3906871	3907425	1e-163	580	7432	M
NorthernBobwhite_ScaffoldedDeNovo_contig_115205	gi|358485511|ref|NC_006088.3 | GGA1	89.43	861	74	4	148	994	3915703	3916560	0	1141	2	S
NorthernBobwhite_ScaffoldedDeNovo_contig_5306	gi|358485511|ref|NC_006088.3 | GGA1	83.96	5511	653	55	12612	17958	3922124	3916681	0	5914	56910	M
NorthernBobwhite_ScaffoldedDeNovo_contig_215848	gi|358485511|ref|NC_006088.3 | GGA1	90.91	33	3	0	82	114	3927744	3927776	0.006	46.4	767	M
NorthernBobwhite_ScaffoldedDeNovo_contig_21017	gi|358485511|ref|NC_006088.3 | GGA1	86.85	2494	268	18	2285	4736	3969029	3971504	0	2993	17766	M
NorthernBobwhite_ScaffoldedDeNovo_contig_153914	gi|358485511|ref|NC_006088.3 | GGA1	83.2	488	60	7	1	481	3974372	3973900	3e-139	499	1757	M
NorthernBobwhite_ScaffoldedDeNovo_contig_155447	gi|358485511|ref|NC_006088.3 | GGA1	83.54	486	62	4	1	481	3974372	3973900	4e-144	515	1961	M
NorthernBobwhite_ScaffoldedDeNovo_contig_64873	gi|358485511|ref|NC_006088.3 | GGA1	74.08	490	89	6	170	644	3979638	3979172	8e-85	318	46	M
NorthernBobwhite_ScaffoldedDeNovo_contig_159803	gi|358485511|ref|NC_006088.3 | GGA1	77.23	325	42	4	43	335	4009259	4009583	7e-69	264	864	M
NorthernBobwhite_ScaffoldedDeNovo_contig_43977	gi|358485511|ref|NC_006088.3 | GGA1	77.68	578	101	11	4	555	4009332	4009907	1e-120	437	493	M
NorthernBobwhite_ScaffoldedDeNovo_contig_182237	gi|358485511|ref|NC_006088.3 | GGA1	77.39	712	106	6	5	667	4009944	4009239	4e-164	581	1763	M
NorthernBobwhite_ScaffoldedDeNovo_contig_106124	gi|358485511|ref|NC_006088.3 | GGA1	87.35	324	36	4	1	324	4012483	4012801	8e-106	387	1	S
NorthernBobwhite_ScaffoldedDeNovo_contig_106125	gi|358485511|ref|NC_006088.3 | GGA1	86.5	326	37	5	1	326	4012483	4012801	5e-102	374	1	S
NorthernBobwhite_ScaffoldedDeNovo_contig_55121	gi|358485511|ref|NC_006088.3 | GGA1	86.37	499	59	6	553	1049	4018546	4018055	2e-161	574	1715	M
NorthernBobwhite_ScaffoldedDeNovo_contig_5208	gi|358485511|ref|NC_006088.3 | GGA1	78.64	5563	728	101	2206	7518	4026456	4021104	0	4635	10748	M
NorthernBobwhite_ScaffoldedDeNovo_contig_198931	gi|358485511|ref|NC_006088.3 | GGA1	82.1	715	102	11	14	711	4027120	4026415	0	686	1	S
NorthernBobwhite_ScaffoldedDeNovo_contig_205969	gi|358485511|ref|NC_006088.3 | GGA1	80.63	351	41	4	1	327	4028578	4028231	2e-89	333	2	M
NorthernBobwhite_ScaffoldedDeNovo_contig_210009	gi|358485511|ref|NC_006088.3 | GGA1	79.89	353	40	6	1	327	4028578	4028231	4e-85	318	2	M
NorthernBobwhite_ScaffoldedDeNovo_contig_22284	gi|358485511|ref|NC_006088.3 | GGA1	80.71	5765	750	92	1	5506	4030625	4036286	0	5295	1730	M
NorthernBobwhite_ScaffoldedDeNovo_contig_40811	gi|358485511|ref|NC_006088.3 | GGA1	81.29	2881	364	38	2429	5212	4043003	4040201	0	2753	2269	M
NorthernBobwhite_ScaffoldedDeNovo_contig_13338	gi|358485511|ref|NC_006088.3 | GGA1	86.28	7230	707	68	2724	9765	4049256	4056388	0	8516	4011	M
NorthernBobwhite_ScaffoldedDeNovo_contig_13989	gi|358485511|ref|NC_006088.3 | GGA1	85.44	5466	587	48	32626	37964	4071047	4065664	0	6253	61242	M
NorthernBobwhite_ScaffoldedDeNovo_contig_49346	gi|358485511|ref|NC_006088.3 | GGA1	85.43	549	46	4	357	871	4071768	4071220	0	643	2	S
NorthernBobwhite_ScaffoldedDeNovo_contig_71824	gi|358485511|ref|NC_006088.3 | GGA1	87.56	434	41	5	2	435	4072324	4072744	2e-148	529	1	S
NorthernBobwhite_ScaffoldedDeNovo_contig_71823	gi|358485511|ref|NC_006088.3 | GGA1	86.87	434	44	5	33	466	4072744	4072324	4e-144	515	1	S
NorthernBobwhite_ScaffoldedDeNovo_contig_198268	gi|358485511|ref|NC_006088.3 | GGA1	88.24	170	19	1	146	315	4105128	4105296	1e-53	214	1	S
NorthernBobwhite_ScaffoldedDeNovo_contig_15370	gi|358485511|ref|NC_006088.3 | GGA1	86.13	4918	472	46	33032	37815	4118596	4113755	0	5777	27509	M
NorthernBobwhite_ScaffoldedDeNovo_contig_150788	gi|358485511|ref|NC_006088.3 | GGA1	80.6	536	63	9	1	497	4123260	4123793	4e-138	495	1	S
NorthernBobwhite_ScaffoldedDeNovo_contig_123932	gi|358485511|ref|NC_006088.3 | GGA1	79.3	314	56	4	1	307	4123768	4124079	7e-69	264	633	M
NorthernBobwhite_ScaffoldedDeNovo_contig_123933	gi|358485511|ref|NC_006088.3 | GGA1	77.53	316	61	5	1	309	4123768	4124080	1e-60	237	1120	M
NorthernBobwhite_ScaffoldedDeNovo_contig_98318	gi|358485511|ref|NC_006088.3 | GGA1	88.26	511	44	3	98	598	4133005	4133509	0	652	1	S
NorthernBobwhite_ScaffoldedDeNovo_contig_100709	gi|358485511|ref|NC_006088.3 | GGA1	84.21	133	20	1	1	132	4159401	4159269	8e-32	141	1	S
NorthernBobwhite_ScaffoldedDeNovo_contig_120037	gi|358485511|ref|NC_006088.3 | GGA1	83.12	871	96	9	3	849	4161361	4160518	0	913	1768	M
NorthernBobwhite_ScaffoldedDeNovo_contig_83510	gi|358485511|ref|NC_006088.3 | GGA1	85.89	567	77	3	188	753	4161880	4162444	0	652	12472	M
NorthernBobwhite_ScaffoldedDeNovo_contig_733	gi|358485511|ref|NC_006088.3 | GGA1	83.75	6007	733	70	9583	15432	4162513	4168433	0	6336	8207	M
NorthernBobwhite_ScaffoldedDeNovo_contig_155064	gi|358485511|ref|NC_006088.3 | GGA1	73.54	325	35	6	40	345	4186456	4186164	1e-54	217	1	S
NorthernBobwhite_ScaffoldedDeNovo_contig_6490	gi|358485511|ref|NC_006088.3 | GGA1	90.74	5627	394	41	22154	27732	4186463	4192010	0	7728	33751	M
NorthernBobwhite_ScaffoldedDeNovo_contig_214278	gi|358485511|ref|NC_006088.3 | GGA1	88.89	36	4	0	39	74	4186590	4186625	0.002	48.2	25	M
NorthernBobwhite_ScaffoldedDeNovo_contig_113362	gi|358485511|ref|NC_006088.3 | GGA1	82.29	576	76	5	1	553	4191985	4192557	1e-163	580	1	S
NorthernBobwhite_ScaffoldedDeNovo_contig_173320	gi|358485511|ref|NC_006088.3 | GGA1	84.03	576	75	4	1	562	4191985	4192557	4e-176	621	1	S
NorthernBobwhite_ScaffoldedDeNovo_contig_148351	gi|358485511|ref|NC_006088.3 | GGA1	83.27	526	56	10	9	509	4222914	4223432	2e-150	536	1	S
NorthernBobwhite_ScaffoldedDeNovo_contig_79366	gi|358485511|ref|NC_006088.3 | GGA1	90.68	987	79	4	2	988	4233682	4234655	0	1359	1	S
NorthernBobwhite_ScaffoldedDeNovo_contig_186366	gi|358485511|ref|NC_006088.3 | GGA1	95.63	229	10	0	1	229	4234696	4234924	4e-100	369	2	S
NorthernBobwhite_ScaffoldedDeNovo_contig_150295	gi|358485511|ref|NC_006088.3 | GGA1	71.03	214	36	9	477	678	4242750	4242949	3e-15	89.7	232	M
NorthernBobwhite_ScaffoldedDeNovo_contig_20544	gi|358485511|ref|NC_006088.3 | GGA1	72.5	160	25	8	1064	1206	4242750	4242907	1e-09	71.6	114	M
NorthernBobwhite_ScaffoldedDeNovo_contig_218469	gi|358485511|ref|NC_006088.3 | GGA1	72.73	154	29	5	240	388	4242750	4242895	8e-13	78.8	135	M
NorthernBobwhite_ScaffoldedDeNovo_contig_184246	gi|358485511|ref|NC_006088.3 | GGA1	72.92	96	24	1	163	258	4242751	4242844	4e-05	53.6	128	M
NorthernBobwhite_ScaffoldedDeNovo_contig_78669	gi|358485511|ref|NC_006088.3 | GGA1	70.47	193	41	6	6625	6801	4242751	4242943	1e-11	78.8	254	M
NorthernBobwhite_ScaffoldedDeNovo_contig_193950	gi|358485511|ref|NC_006088.3 | GGA1	75.36	207	35	9	573	772	4242752	4242949	2e-24	118	1	S
NorthernBobwhite_ScaffoldedDeNovo_contig_65064	gi|358485511|ref|NC_006088.3 | GGA1	73.45	113	27	3	1536	1647	4242753	4242863	4e-06	59	179	M
NorthernBobwhite_ScaffoldedDeNovo_contig_175097	gi|358485511|ref|NC_006088.3 | GGA1	73.53	170	36	7	1932	2097	4242755	4242919	1e-12	80.6	62	M
NorthernBobwhite_ScaffoldedDeNovo_contig_160170	gi|358485511|ref|NC_006088.3 | GGA1	81.48	81	10	2	33	113	4242757	4242832	8e-12	75.2	150	M
NorthernBobwhite_ScaffoldedDeNovo_contig_216357	gi|358485511|ref|NC_006088.3 | GGA1	73.12	93	14	3	566	657	4242758	4242840	0.0002	51.8	94	M
NorthernBobwhite_ScaffoldedDeNovo_contig_71171	gi|358485511|ref|NC_006088.3 | GGA1	75.23	109	23	2	85	190	4242760	4242867	9e-10	69.8	128	M
NorthernBobwhite_ScaffoldedDeNovo_contig_133268	gi|358485511|ref|NC_006088.3 | GGA1	77.22	79	14	1	1076	1150	4242765	4242843	6e-07	60.8	187	M
NorthernBobwhite_ScaffoldedDeNovo_contig_44820	gi|358485511|ref|NC_006088.3 | GGA1	78.95	76	14	1	10901	10974	4242772	4242847	3e-06	62.6	189	M
NorthernBobwhite_ScaffoldedDeNovo_contig_192599	gi|358485511|ref|NC_006088.3 | GGA1	88.89	36	4	0	136	171	4242783	4242818	0.001	48.2	74	M
NorthernBobwhite_ScaffoldedDeNovo_contig_218190	gi|358485511|ref|NC_006088.3 | GGA1	75.95	79	12	3	306	377	4242785	4242863	0.0003	50	78	M
NorthernBobwhite_ScaffoldedDeNovo_contig_161796	gi|358485511|ref|NC_006088.3 | GGA1	72.61	157	31	5	126	273	4242788	4242941	7e-12	78.8	508	M
NorthernBobwhite_ScaffoldedDeNovo_contig_100304	gi|358485511|ref|NC_006088.3 | GGA1	72.47	178	31	7	1068	1245	4242789	4242948	3e-14	86	86	M
NorthernBobwhite_ScaffoldedDeNovo_contig_198463	gi|358485511|ref|NC_006088.3 | GGA1	69.68	155	31	7	151	297	4242790	4242936	0.0002	51.8	126	M
NorthernBobwhite_ScaffoldedDeNovo_contig_210557	gi|358485511|ref|NC_006088.3 | GGA1	81.48	54	9	1	1	54	4242813	4242761	0.0003	50	493	M
NorthernBobwhite_ScaffoldedDeNovo_contig_183163	gi|358485511|ref|NC_006088.3 | GGA1	74.07	108	24	2	480	587	4242816	4242919	8e-08	64.4	235	M
NorthernBobwhite_ScaffoldedDeNovo_contig_214258	gi|358485511|ref|NC_006088.3 | GGA1	80.65	62	8	2	245	305	4242825	4242767	3e-05	53.6	490	M
NorthernBobwhite_ScaffoldedDeNovo_contig_193620	gi|358485511|ref|NC_006088.3 | GGA1	74.77	111	18	4	53	162	4242845	4242744	2e-08	66.2	44	M
NorthernBobwhite_ScaffoldedDeNovo_contig_109185	gi|358485511|ref|NC_006088.3 | GGA1	75	96	18	2	1	96	4242846	4242757	3e-07	62.6	27	M
NorthernBobwhite_ScaffoldedDeNovo_contig_33616	gi|358485511|ref|NC_006088.3 | GGA1	81.82	66	6	1	1	66	4242846	4242787	2e-08	66.2	42	M
NorthernBobwhite_ScaffoldedDeNovo_contig_57581	gi|358485511|ref|NC_006088.3 | GGA1	82.26	62	7	1	257	318	4242847	4242790	1e-07	62.6	54	M
NorthernBobwhite_ScaffoldedDeNovo_contig_63234	gi|358485511|ref|NC_006088.3 | GGA1	89.83	59	6	0	5206	5264	4242848	4242790	1e-11	80.6	222	M
NorthernBobwhite_ScaffoldedDeNovo_contig_218340	gi|358485511|ref|NC_006088.3 | GGA1	75.89	112	22	3	1	107	4242864	4242753	1e-10	71.6	71	M
NorthernBobwhite_ScaffoldedDeNovo_contig_106209	gi|358485511|ref|NC_006088.3 | GGA1	73.21	112	17	3	1330	1428	4242866	4242755	1e-07	66.2	104	M
NorthernBobwhite_ScaffoldedDeNovo_contig_63600	gi|358485511|ref|NC_006088.3 | GGA1	78.64	103	16	2	1643	1739	4242891	4242789	3e-13	84.2	378	M
NorthernBobwhite_ScaffoldedDeNovo_contig_58457	gi|358485511|ref|NC_006088.3 | GGA1	73.87	111	15	3	433	538	4242892	4242791	7e-10	69.8	261	M
NorthernBobwhite_ScaffoldedDeNovo_contig_174978	gi|358485511|ref|NC_006088.3 | GGA1	72.97	148	32	5	1094	1236	4242895	4242751	4e-10	71.6	164	M
NorthernBobwhite_ScaffoldedDeNovo_contig_203740	gi|358485511|ref|NC_006088.3 | GGA1	76.86	121	22	4	141	260	4242905	4242790	3e-13	80.6	72	M
NorthernBobwhite_ScaffoldedDeNovo_contig_140378	gi|358485511|ref|NC_006088.3 | GGA1	68.79	173	34	8	14	177	4242914	4242753	0.0005	51.8	13	M
NorthernBobwhite_ScaffoldedDeNovo_contig_76383	gi|358485511|ref|NC_006088.3 | GGA1	73.64	129	19	4	305	419	4242917	4242790	2e-11	75.2	332	M
NorthernBobwhite_ScaffoldedDeNovo_contig_214923	gi|358485511|ref|NC_006088.3 | GGA1	84.91	53	5	1	1	50	4242919	4242867	5e-07	59	37	M
NorthernBobwhite_ScaffoldedDeNovo_contig_73568	gi|358485511|ref|NC_006088.3 | GGA1	74.47	141	24	5	631	764	4242919	4242784	2e-12	80.6	309	M
NorthernBobwhite_ScaffoldedDeNovo_contig_77569	gi|358485511|ref|NC_006088.3 | GGA1	69.23	143	24	5	540	677	4242920	4242793	4e-05	55.4	140	M
NorthernBobwhite_ScaffoldedDeNovo_contig_129170	gi|358485511|ref|NC_006088.3 | GGA1	75	156	23	6	1523	1663	4242933	4242779	4e-16	93.3	170	M
NorthernBobwhite_ScaffoldedDeNovo_contig_143537	gi|358485511|ref|NC_006088.3 | GGA1	77.12	153	20	7	50	199	4242941	4242801	2e-18	100	341	M
NorthernBobwhite_ScaffoldedDeNovo_contig_65233	gi|358485511|ref|NC_006088.3 | GGA1	84.2	753	93	8	4	742	4247835	4247095	0	809	1	S
NorthernBobwhite_ScaffoldedDeNovo_contig_66740	gi|358485511|ref|NC_006088.3 | GGA1	79.71	69	11	1	988	1056	4249222	4249287	7e-07	60.8	1837	M
NorthernBobwhite_ScaffoldedDeNovo_contig_120728	gi|358485511|ref|NC_006088.3 | GGA1	80	60	12	0	2625	2684	4249232	4249291	0.0001	55.4	56	M
NorthernBobwhite_ScaffoldedDeNovo_contig_167453	gi|358485511|ref|NC_006088.3 | GGA1	76.71	73	15	1	94	166	4249244	4249314	3e-05	53.6	1	S
NorthernBobwhite_ScaffoldedDeNovo_contig_61644	gi|358485511|ref|NC_006088.3 | GGA1	80.77	52	6	2	80	131	4249248	4249295	0.036	44.6	25	M
NorthernBobwhite_ScaffoldedDeNovo_contig_144727	gi|358485511|ref|NC_006088.3 | GGA1	95	40	2	0	598	637	4249254	4249293	3e-08	64.4	98	M
NorthernBobwhite_ScaffoldedDeNovo_contig_170183	gi|358485511|ref|NC_006088.3 | GGA1	92.31	39	3	0	207	245	4249255	4249293	3e-06	57.2	52	M
NorthernBobwhite_ScaffoldedDeNovo_contig_202274	gi|358485511|ref|NC_006088.3 | GGA1	93.94	33	2	0	1	33	4249265	4249233	8e-05	51.8	2360	M
NorthernBobwhite_ScaffoldedDeNovo_contig_206904	gi|358485511|ref|NC_006088.3 | GGA1	89.47	38	4	0	110	147	4249293	4249256	8e-05	51.8	412	M
NorthernBobwhite_ScaffoldedDeNovo_contig_206914	gi|358485511|ref|NC_006088.3 | GGA1	81.48	54	4	1	1288	1341	4249294	4249247	0.0001	53.6	14	M
NorthernBobwhite_ScaffoldedDeNovo_contig_42747	gi|358485511|ref|NC_006088.3 | GGA1	86.21	58	8	0	26662	26719	4249308	4249251	3e-08	69.8	260	M
NorthernBobwhite_ScaffoldedDeNovo_contig_114053	gi|358485511|ref|NC_006088.3 | GGA1	93.94	33	2	0	3	35	4249314	4249282	0.0002	51.8	125	M
NorthernBobwhite_ScaffoldedDeNovo_contig_143777	gi|358485511|ref|NC_006088.3 | GGA1	85.71	336	42	1	18	353	4254430	4254759	8e-107	390	1	S
NorthernBobwhite_ScaffoldedDeNovo_contig_218726	gi|358485511|ref|NC_006088.3 | GGA1	79.01	405	45	3	1	377	4258751	4259143	8e-101	370	214	M
NorthernBobwhite_ScaffoldedDeNovo_contig_116435	gi|358485511|ref|NC_006088.3 | GGA1	77.4	407	50	3	1	379	4259143	4258751	1e-92	343	160	M
NorthernBobwhite_ScaffoldedDeNovo_contig_20864	gi|358485511|ref|NC_006088.3 | GGA1	89.58	7402	516	57	8112	15404	4262764	4270019	0	9845	2489	M
NorthernBobwhite_ScaffoldedDeNovo_contig_52898	gi|358485511|ref|NC_006088.3 | GGA1	82.42	364	56	3	2	358	4270887	4271249	4e-98	361	1	S
NorthernBobwhite_ScaffoldedDeNovo_contig_100649	gi|358485511|ref|NC_006088.3 | GGA1	86.7	970	87	9	1	958	4278313	4279252	0	1166	1	S
NorthernBobwhite_ScaffoldedDeNovo_contig_98616	gi|358485511|ref|NC_006088.3 | GGA1	66.74	433	62	10	137	490	4279534	4279963	1e-37	161	504	M
NorthernBobwhite_ScaffoldedDeNovo_contig_97050	gi|358485511|ref|NC_006088.3 | GGA1	88.44	346	20	2	1	329	4289561	4289219	7e-126	453	1	S
NorthernBobwhite_ScaffoldedDeNovo_contig_133756	gi|358485511|ref|NC_006088.3 | GGA1	77.88	217	27	4	43	259	4290208	4290403	3e-42	176	1	S
NorthernBobwhite_ScaffoldedDeNovo_contig_214070	gi|358485511|ref|NC_006088.3 | GGA1	85.15	532	42	8	1	516	4293015	4292505	3e-170	601	1	S
NorthernBobwhite_ScaffoldedDeNovo_contig_72779	gi|358485511|ref|NC_006088.3 | GGA1	75.29	781	85	19	1	710	4293752	4293009	8e-155	551	1	S
NorthernBobwhite_ScaffoldedDeNovo_contig_65851	gi|358485511|ref|NC_006088.3 | GGA1	76.03	1452	194	33	33	1378	4294073	4295476	0	1040	1	S
NorthernBobwhite_ScaffoldedDeNovo_contig_216129	gi|358485511|ref|NC_006088.3 | GGA1	85.14	296	25	6	13	292	4295554	4295846	2e-87	325	1	S
NorthernBobwhite_ScaffoldedDeNovo_contig_84357	gi|358485511|ref|NC_006088.3 | GGA1	87.81	919	41	13	1206	2100	4297675	4298546	0	1159	2	S
NorthernBobwhite_ScaffoldedDeNovo_contig_4834	gi|358485511|ref|NC_006088.3 | GGA1	84.27	2346	261	26	4165	6450	4302069	4304366	0	2547	7	M
NorthernBobwhite_ScaffoldedDeNovo_contig_29584	gi|358485511|ref|NC_006088.3 | GGA1	89.26	5995	435	38	1	5898	4304523	4310405	0	7925	4451	M
NorthernBobwhite_ScaffoldedDeNovo_contig_59217	gi|358485511|ref|NC_006088.3 | GGA1	87.25	353	36	2	1	344	4318967	4319319	7e-120	434	1	S
NorthernBobwhite_ScaffoldedDeNovo_contig_160536	gi|358485511|ref|NC_006088.3 | GGA1	83.06	679	83	10	3	663	4319472	4320136	0	690	1	S
NorthernBobwhite_ScaffoldedDeNovo_contig_194090	gi|358485511|ref|NC_006088.3 | GGA1	83.28	293	38	4	2	291	4319852	4320136	9e-80	300	1	S
NorthernBobwhite_ScaffoldedDeNovo_contig_175143	gi|358485511|ref|NC_006088.3 | GGA1	88.04	418	45	4	10	425	4326327	4325913	3e-144	515	1	S
NorthernBobwhite_ScaffoldedDeNovo_contig_194249	gi|358485511|ref|NC_006088.3 | GGA1	86.53	438	45	3	400	834	4328193	4328619	1e-146	524	2	S
NorthernBobwhite_ScaffoldedDeNovo_contig_3260	gi|358485511|ref|NC_006088.3 | GGA1	88.94	7588	642	39	2437	9866	4331096	4338644	0	9903	115563	M
NorthernBobwhite_ScaffoldedDeNovo_contig_110848	gi|358485511|ref|NC_006088.3 | GGA1	81.66	398	59	5	1	393	4348086	4348474	2e-103	379	635	M
NorthernBobwhite_ScaffoldedDeNovo_contig_201231	gi|358485511|ref|NC_006088.3 | GGA1	83.33	342	41	4	1	326	4366015	4366356	1e-96	356	1	S
NorthernBobwhite_ScaffoldedDeNovo_contig_156003	gi|358485511|ref|NC_006088.3 | GGA1	81.52	341	47	4	8	332	4366356	4366016	7e-88	327	1	S
NorthernBobwhite_ScaffoldedDeNovo_contig_220267	gi|358485511|ref|NC_006088.3 | GGA1	96	25	1	0	224	248	4369572	4369548	0.13	41	14	M
NorthernBobwhite_ScaffoldedDeNovo_contig_171899	gi|358485511|ref|NC_006088.3 | GGA1	83.52	449	74	0	1	449	4370345	4370793	9e-133	477	1	S
NorthernBobwhite_ScaffoldedDeNovo_contig_73694	gi|358485511|ref|NC_006088.3 | GGA1	83.3	455	76	0	1	455	4370799	4370345	3e-133	479	1	S
NorthernBobwhite_ScaffoldedDeNovo_contig_127581	gi|358485511|ref|NC_006088.3 | GGA1	80.7	57	6	1	1079	1130	4378654	4378598	0.0002	53.6	45	M
NorthernBobwhite_ScaffoldedDeNovo_contig_110213	gi|358485511|ref|NC_006088.3 | GGA1	86.27	488	53	7	1	481	4379447	4379927	1e-157	560	1	S
NorthernBobwhite_ScaffoldedDeNovo_contig_138480	gi|358485511|ref|NC_006088.3 | GGA1	86.26	393	45	3	1	388	4386535	4386147	6e-128	461	2	M
NorthernBobwhite_ScaffoldedDeNovo_contig_169390	gi|358485511|ref|NC_006088.3 | GGA1	83.12	391	46	4	1	373	4386535	4386147	3e-112	408	2	M
NorthernBobwhite_ScaffoldedDeNovo_contig_204117	gi|358485511|ref|NC_006088.3 | GGA1	88.57	35	4	0	67	101	4393205	4393239	0.003	46.4	168	M
NorthernBobwhite_ScaffoldedDeNovo_contig_98398	gi|358485511|ref|NC_006088.3 | GGA1	90.43	345	31	1	1	345	4400313	4400655	3e-131	471	1	S
NorthernBobwhite_ScaffoldedDeNovo_contig_118718	gi|358485511|ref|NC_006088.3 | GGA1	94.54	659	29	4	1	653	4400330	4399673	0	1014	1	S
NorthernBobwhite_ScaffoldedDeNovo_contig_220092	gi|358485511|ref|NC_006088.3 | GGA1	87.23	47	5	1	1	47	4405744	4405699	1e-05	55.4	48	M
NorthernBobwhite_ScaffoldedDeNovo_contig_171952	gi|358485511|ref|NC_006088.3 | GGA1	82.22	45	8	0	76	120	4405749	4405705	0.009	46.4	10	M
NorthernBobwhite_ScaffoldedDeNovo_contig_182894	gi|358485511|ref|NC_006088.3 | GGA1	77.94	68	8	3	34	101	4405758	4405698	0.001	48.2	27	M
NorthernBobwhite_ScaffoldedDeNovo_contig_122668	gi|358485511|ref|NC_006088.3 | GGA1	91.3	46	4	0	29	74	4405761	4405716	3e-08	66.2	572	M
NorthernBobwhite_ScaffoldedDeNovo_contig_157987	gi|358485511|ref|NC_006088.3 | GGA1	80.43	46	9	0	1052	1097	4405764	4405719	0.16	42.8	30	M
NorthernBobwhite_ScaffoldedDeNovo_contig_137598	gi|358485511|ref|NC_006088.3 | GGA1	78.15	444	64	4	32	445	4407793	4407353	2e-102	376	1585	M
NorthernBobwhite_ScaffoldedDeNovo_contig_150800	gi|358485511|ref|NC_006088.3 | GGA1	78.83	444	61	5	31	444	4407793	4407353	4e-105	385	1647	M
NorthernBobwhite_ScaffoldedDeNovo_contig_57395	gi|358485511|ref|NC_006088.3 | GGA1	93.17	278	18	1	387	664	4423632	4423908	5e-113	412	2	S
NorthernBobwhite_ScaffoldedDeNovo_contig_5736	gi|358485511|ref|NC_006088.3 | GGA1	85.17	15851	1767	137	166808	182311	4454243	4438630	0	17900	159699	M
NorthernBobwhite_ScaffoldedDeNovo_contig_131204	gi|358485511|ref|NC_006088.3 | GGA1	77.72	395	35	3	1	344	4464065	4463673	1e-94	351	4	S
NorthernBobwhite_ScaffoldedDeNovo_contig_162084	gi|358485511|ref|NC_006088.3 | GGA1	68.78	221	53	9	1266	1478	4466361	4466573	3e-07	62.6	98	M
NorthernBobwhite_ScaffoldedDeNovo_contig_134947	gi|358485511|ref|NC_006088.3 | GGA1	82.39	1408	169	19	142	1487	4466473	4467863	0	1407	2	S
NorthernBobwhite_ScaffoldedDeNovo_contig_197247	gi|358485511|ref|NC_006088.3 | GGA1	88.18	440	46	2	1	437	4467838	4468274	1e-156	556	1	S
NorthernBobwhite_ScaffoldedDeNovo_contig_126214	gi|358485511|ref|NC_006088.3 | GGA1	93.55	31	2	0	405	435	4487345	4487315	0.001	48.2	24	M
NorthernBobwhite_ScaffoldedDeNovo_contig_152853	gi|358485511|ref|NC_006088.3 | GGA1	96.15	26	1	0	529	554	4523243	4523268	0.14	42.8	47	M
NorthernBobwhite_ScaffoldedDeNovo_contig_123950	gi|358485511|ref|NC_006088.3 | GGA1	87.47	415	45	4	1	408	4557632	4558046	2e-140	502	1	S
NorthernBobwhite_ScaffoldedDeNovo_contig_101110	gi|358485511|ref|NC_006088.3 | GGA1	85.44	1353	155	11	1	1322	4602931	4601590	0	1541	2	S
NorthernBobwhite_ScaffoldedDeNovo_contig_184202	gi|358485511|ref|NC_006088.3 | GGA1	85.08	362	34	5	1	342	4607285	4607646	3e-111	405	1	S
NorthernBobwhite_ScaffoldedDeNovo_contig_186365	gi|358485511|ref|NC_006088.3 | GGA1	85.64	362	32	5	1	342	4607285	4607646	7e-114	414	1	S
NorthernBobwhite_ScaffoldedDeNovo_contig_124568	gi|358485511|ref|NC_006088.3 | GGA1	84.71	255	38	1	89	342	4614507	4614761	1e-73	280	1038	M
NorthernBobwhite_ScaffoldedDeNovo_contig_116655	gi|358485511|ref|NC_006088.3 | GGA1	78.79	613	90	5	84	679	4614991	4615580	2e-149	533	6348	M
NorthernBobwhite_ScaffoldedDeNovo_contig_21926	gi|358485511|ref|NC_006088.3 | GGA1	84.72	386	42	2	1	370	4618044	4617660	6e-121	437	1	S
NorthernBobwhite_ScaffoldedDeNovo_contig_109992	gi|358485511|ref|NC_006088.3 | GGA1	82.91	357	49	1	1	345	4618182	4618538	2e-102	376	5122	M
NorthernBobwhite_ScaffoldedDeNovo_contig_192813	gi|358485511|ref|NC_006088.3 | GGA1	86.29	321	36	2	1	314	4623577	4623258	1e-103	379	1	S
NorthernBobwhite_ScaffoldedDeNovo_contig_46183	gi|358485511|ref|NC_006088.3 | GGA1	83.56	2768	367	21	3784	6492	4626834	4624096	0	2926	5269	M
NorthernBobwhite_ScaffoldedDeNovo_contig_142537	gi|358485511|ref|NC_006088.3 | GGA1	87.68	414	42	3	60	468	4630605	4631014	4e-143	511	1	S
NorthernBobwhite_ScaffoldedDeNovo_contig_142538	gi|358485511|ref|NC_006088.3 | GGA1	86.96	644	71	3	1	634	4631014	4630374	0	782	1	S
NorthernBobwhite_ScaffoldedDeNovo_contig_37276	gi|358485511|ref|NC_006088.3 | GGA1	85.85	4510	465	45	7870	12271	4636768	4632324	0	5211	22830	M
NorthernBobwhite_ScaffoldedDeNovo_contig_185163	gi|358485511|ref|NC_006088.3 | GGA1	84.48	612	68	5	1	589	4640602	4639995	0	677	1	S
NorthernBobwhite_ScaffoldedDeNovo_contig_123427	gi|358485511|ref|NC_006088.3 | GGA1	80.95	63	10	2	1	61	4640721	4640783	6e-05	53.6	59	M
NorthernBobwhite_ScaffoldedDeNovo_contig_169985	gi|358485511|ref|NC_006088.3 | GGA1	77.19	57	13	0	165	221	4640761	4640705	0.041	44.6	36	M
NorthernBobwhite_ScaffoldedDeNovo_contig_218021	gi|358485511|ref|NC_006088.3 | GGA1	71.07	121	24	5	144	254	4640791	4640672	0.001	48.2	170	M
NorthernBobwhite_ScaffoldedDeNovo_contig_191516	gi|358485511|ref|NC_006088.3 | GGA1	89.66	29	3	0	229	257	4646532	4646560	0.56	39.2	48	M
NorthernBobwhite_ScaffoldedDeNovo_contig_14903	gi|358485511|ref|NC_006088.3 | GGA1	88.77	7875	672	59	13965	21726	4665305	4657530	0	10140	28106	M
NorthernBobwhite_ScaffoldedDeNovo_contig_164602	gi|358485511|ref|NC_006088.3 | GGA1	85.12	598	68	10	9	588	4673545	4674139	0	652	441	M
NorthernBobwhite_ScaffoldedDeNovo_contig_33019	gi|358485511|ref|NC_006088.3 | GGA1	87.56	9207	859	74	1833	10863	4680670	4689766	0	11370	9130	M
NorthernBobwhite_ScaffoldedDeNovo_contig_216852	gi|358485511|ref|NC_006088.3 | GGA1	84.57	324	47	2	2	325	4696290	4696610	2e-95	352	1	S
NorthernBobwhite_ScaffoldedDeNovo_contig_163375	gi|358485511|ref|NC_006088.3 | GGA1	84.21	304	45	2	19	319	4697655	4697352	3e-87	325	1	S
NorthernBobwhite_ScaffoldedDeNovo_contig_174993	gi|358485511|ref|NC_006088.3 | GGA1	93.6	172	10	1	272	442	4698438	4698267	1e-66	257	2	S
NorthernBobwhite_ScaffoldedDeNovo_contig_38706	gi|358485511|ref|NC_006088.3 | GGA1	81.77	1651	157	22	1	1602	4708892	4707337	0	1651	2	S
NorthernBobwhite_ScaffoldedDeNovo_contig_85898	gi|358485511|ref|NC_006088.3 | GGA1	84.95	558	73	6	198	746	4709188	4709743	1e-172	610	2	S
NorthernBobwhite_ScaffoldedDeNovo_contig_10587	gi|358485511|ref|NC_006088.3 | GGA1	80	70	12	1	1131	1200	4709994	4710061	1e-06	60.8	426	M
NorthernBobwhite_ScaffoldedDeNovo_contig_138224	gi|358485511|ref|NC_006088.3 | GGA1	87.48	559	59	5	4	555	4710619	4710065	0	681	2	S
NorthernBobwhite_ScaffoldedDeNovo_contig_8560	gi|358485511|ref|NC_006088.3 | GGA1	85.4	12722	1341	133	27512	39869	4723244	4710676	0	14430	49107	M
NorthernBobwhite_ScaffoldedDeNovo_contig_59956	gi|358485511|ref|NC_006088.3 | GGA1	82.35	827	115	12	360	1167	4738123	4738937	0	807	2	S
NorthernBobwhite_ScaffoldedDeNovo_contig_161074	gi|358485511|ref|NC_006088.3 | GGA1	75.6	623	73	15	1	560	4738912	4739518	2e-122	443	16155	M
NorthernBobwhite_ScaffoldedDeNovo_contig_54118	gi|358485511|ref|NC_006088.3 | GGA1	76.73	623	70	14	1	564	4739518	4738912	4e-132	475	21168	M
NorthernBobwhite_ScaffoldedDeNovo_contig_142162	gi|358485511|ref|NC_006088.3 | GGA1	80	585	70	6	1	544	4740071	4739493	9e-153	544	113	M
NorthernBobwhite_ScaffoldedDeNovo_contig_200643	gi|358485511|ref|NC_006088.3 | GGA1	84.49	303	41	2	2	300	4743937	4743637	5e-89	331	1	S
NorthernBobwhite_ScaffoldedDeNovo_contig_200644	gi|358485511|ref|NC_006088.3 | GGA1	84.26	305	39	4	2	301	4743937	4743637	8e-87	324	1	S
NorthernBobwhite_ScaffoldedDeNovo_contig_11207	gi|358485511|ref|NC_006088.3 | GGA1	83.63	16208	1830	175	17341	33027	4770775	4786679	0	17220	28043	M
NorthernBobwhite_ScaffoldedDeNovo_contig_150391	gi|358485511|ref|NC_006088.3 | GGA1	88.21	229	23	1	372	596	4786934	4787162	1e-76	291	2	S
NorthernBobwhite_ScaffoldedDeNovo_contig_103251	gi|358485511|ref|NC_006088.3 | GGA1	83.3	527	56	4	2	513	4787164	4786655	2e-159	565	1	S
NorthernBobwhite_ScaffoldedDeNovo_contig_183266	gi|358485511|ref|NC_006088.3 | GGA1	76.05	334	45	6	56	369	4801865	4801547	2e-63	246	289	M
NorthernBobwhite_ScaffoldedDeNovo_contig_3796	gi|358485511|ref|NC_006088.3 | GGA1	87.11	8807	823	86	1	8587	4807132	4815846	0	10660	16148	M
NorthernBobwhite_ScaffoldedDeNovo_contig_167004	gi|358485511|ref|NC_006088.3 | GGA1	85	40	6	0	283	322	4831182	4831221	0.005	46.4	1565	M
NorthernBobwhite_ScaffoldedDeNovo_contig_218012	gi|358485511|ref|NC_006088.3 | GGA1	84.21	38	6	0	332	369	4834982	4834945	0.069	42.8	14	M
NorthernBobwhite_ScaffoldedDeNovo_contig_71073	gi|358485511|ref|NC_006088.3 | GGA1	80.2	904	109	13	1	880	4840476	4839619	0	829	1	S
NorthernBobwhite_ScaffoldedDeNovo_contig_61747	gi|358485511|ref|NC_006088.3 | GGA1	78.87	620	77	3	1	571	4903212	4902598	1e-158	563	1	S
NorthernBobwhite_ScaffoldedDeNovo_contig_61746	gi|358485511|ref|NC_006088.3 | GGA1	73.99	419	55	3	1	370	4903212	4902799	1e-79	300	1	S
NorthernBobwhite_ScaffoldedDeNovo_contig_103406	gi|358485511|ref|NC_006088.3 | GGA1	77.87	750	99	14	2	697	4906636	4905900	5e-170	601	1	S
NorthernBobwhite_ScaffoldedDeNovo_contig_12858	gi|358485511|ref|NC_006088.3 | GGA1	83.34	3854	514	37	5017	8823	4907408	4911180	0	4004	36521	M
NorthernBobwhite_ScaffoldedDeNovo_contig_8910	gi|358485511|ref|NC_006088.3 | GGA1	81.04	5274	672	60	18313	23431	4925081	4919981	0	5029	15614	M
NorthernBobwhite_ScaffoldedDeNovo_contig_61930	gi|358485511|ref|NC_006088.3 | GGA1	90.8	337	31	0	20	356	4929697	4930033	6e-130	468	2	S
NorthernBobwhite_ScaffoldedDeNovo_contig_172219	gi|358485511|ref|NC_006088.3 | GGA1	78.08	479	91	5	123	589	4930857	4931333	7e-104	381	3926	M
NorthernBobwhite_ScaffoldedDeNovo_contig_119034	gi|358485511|ref|NC_006088.3 | GGA1	77.02	470	95	5	105	562	4930865	4931333	1e-94	351	3518	M
NorthernBobwhite_ScaffoldedDeNovo_contig_31678	gi|358485511|ref|NC_006088.3 | GGA1	81.87	342	41	4	31	352	4932194	4932534	4e-91	338	1	S
NorthernBobwhite_ScaffoldedDeNovo_contig_134668	gi|358485511|ref|NC_006088.3 | GGA1	86.63	793	80	3	5	771	4939408	4938616	0	962	2	S
NorthernBobwhite_ScaffoldedDeNovo_contig_74896	gi|358485511|ref|NC_006088.3 | GGA1	86.89	366	42	3	10	369	4939887	4940252	4e-120	435	2	S
NorthernBobwhite_ScaffoldedDeNovo_contig_187727	gi|358485511|ref|NC_006088.3 | GGA1	73.96	192	32	10	6	189	4940495	4940676	8e-17	93.3	119	M
NorthernBobwhite_ScaffoldedDeNovo_contig_144740	gi|358485511|ref|NC_006088.3 | GGA1	87.54	329	34	1	162	483	4949389	4949717	1e-112	410	2	S
NorthernBobwhite_ScaffoldedDeNovo_contig_186205	gi|358485511|ref|NC_006088.3 | GGA1	85.41	329	31	2	333	644	4949389	4949717	2e-104	383	2	S
NorthernBobwhite_ScaffoldedDeNovo_contig_130794	gi|358485511|ref|NC_006088.3 | GGA1	86.13	310	38	2	1	307	4949692	4949999	3e-98	361	1	S
NorthernBobwhite_ScaffoldedDeNovo_contig_200324	gi|358485511|ref|NC_006088.3 | GGA1	85.53	864	115	5	2	858	4951009	4950149	0	982	1	S
NorthernBobwhite_ScaffoldedDeNovo_contig_1595	gi|358485511|ref|NC_006088.3 | GGA1	85.15	4746	544	34	18159	22797	4957221	4952530	0	5373	64679	M
NorthernBobwhite_ScaffoldedDeNovo_contig_90255	gi|358485511|ref|NC_006088.3 | GGA1	92.31	26	2	0	44	69	4970115	4970140	0.52	39.2	7	M
NorthernBobwhite_ScaffoldedDeNovo_contig_73882	gi|358485511|ref|NC_006088.3 | GGA1	82.47	776	96	11	2	741	4975859	4976630	0	773	1	S
NorthernBobwhite_ScaffoldedDeNovo_contig_73883	gi|358485511|ref|NC_006088.3 | GGA1	83.37	493	61	5	2	479	4975859	4976345	1e-144	517	1	S
NorthernBobwhite_ScaffoldedDeNovo_contig_216748	gi|358485511|ref|NC_006088.3 | GGA1	77.5	360	56	3	1	336	4977088	4977446	1e-77	293	1	S
NorthernBobwhite_ScaffoldedDeNovo_contig_127360	gi|358485511|ref|NC_006088.3 | GGA1	70.57	350	45	6	1	338	4977113	4976810	4e-47	192	1	S
NorthernBobwhite_ScaffoldedDeNovo_contig_188811	gi|358485511|ref|NC_006088.3 | GGA1	81.07	486	73	3	9	475	4977429	4977914	2e-129	466	1	S
NorthernBobwhite_ScaffoldedDeNovo_contig_200376	gi|358485511|ref|NC_006088.3 | GGA1	77.78	360	48	4	1	329	4977446	4977088	1e-79	300	1	S
NorthernBobwhite_ScaffoldedDeNovo_contig_142446	gi|358485511|ref|NC_006088.3 | GGA1	74.7	506	71	9	1	453	4977889	4978390	1e-93	347	1	S
NorthernBobwhite_ScaffoldedDeNovo_contig_176945	gi|358485511|ref|NC_006088.3 | GGA1	75.49	506	73	8	1	459	4977889	4978390	1e-98	363	1	S
NorthernBobwhite_ScaffoldedDeNovo_contig_90066	gi|358485511|ref|NC_006088.3 | GGA1	84.26	4498	532	57	1	4410	4978562	4982971	0	4821	1	S
NorthernBobwhite_ScaffoldedDeNovo_contig_13938	gi|358485511|ref|NC_006088.3 | GGA1	86.9	4244	430	40	15924	20105	4999650	5003829	0	5081	17394	M
NorthernBobwhite_ScaffoldedDeNovo_contig_166111	gi|358485511|ref|NC_006088.3 | GGA1	88.34	283	29	2	2	282	5003807	5004087	2e-96	356	1	S
NorthernBobwhite_ScaffoldedDeNovo_contig_194901	gi|358485511|ref|NC_006088.3 | GGA1	87.54	281	35	0	2	282	5003807	5004087	3e-94	349	1	S
NorthernBobwhite_ScaffoldedDeNovo_contig_166110	gi|358485511|ref|NC_006088.3 | GGA1	83.59	128	12	1	52	179	5004973	5004855	3e-31	140	2	S
NorthernBobwhite_ScaffoldedDeNovo_contig_218537	gi|358485511|ref|NC_006088.3 | GGA1	100	22	0	0	4	25	5008873	5008894	0.15	41	65	M
NorthernBobwhite_ScaffoldedDeNovo_contig_169613	gi|358485511|ref|NC_006088.3 | GGA1	81.78	269	48	1	1	269	5011693	5011960	1e-67	260	1659	M
NorthernBobwhite_ScaffoldedDeNovo_contig_195360	gi|358485511|ref|NC_006088.3 | GGA1	88.57	35	4	0	947	981	5019605	5019639	0.017	46.4	41	M
NorthernBobwhite_ScaffoldedDeNovo_contig_136030	gi|358485511|ref|NC_006088.3 | GGA1	79.92	503	85	6	3	492	5025917	5026416	2e-121	439	1	S
NorthernBobwhite_ScaffoldedDeNovo_contig_157459	gi|358485511|ref|NC_006088.3 | GGA1	80.32	503	91	4	1	498	5026416	5025917	1e-124	450	1	S
NorthernBobwhite_ScaffoldedDeNovo_contig_26776	gi|358485511|ref|NC_006088.3 | GGA1	82.01	478	85	1	1	477	5029645	5029168	8e-134	480	22690	M
NorthernBobwhite_ScaffoldedDeNovo_contig_135698	gi|358485511|ref|NC_006088.3 | GGA1	84.21	247	23	6	91	329	5030530	5030292	1e-66	257	1	S
NorthernBobwhite_ScaffoldedDeNovo_contig_135699	gi|358485511|ref|NC_006088.3 | GGA1	85.02	247	21	6	91	329	5030530	5030292	2e-69	266	1	S
NorthernBobwhite_ScaffoldedDeNovo_contig_101311	gi|358485511|ref|NC_006088.3 | GGA1	81.23	405	49	8	1	382	5030919	5031319	2e-102	376	1	S
NorthernBobwhite_ScaffoldedDeNovo_contig_38761	gi|358485511|ref|NC_006088.3 | GGA1	81.83	1029	134	14	31	1030	5034076	5033072	0	998	1	S
NorthernBobwhite_ScaffoldedDeNovo_contig_17025	gi|358485511|ref|NC_006088.3 | GGA1	82	5305	665	61	3655	8779	5043055	5037861	0	5249	19599	M
NorthernBobwhite_ScaffoldedDeNovo_contig_91316	gi|358485511|ref|NC_006088.3 | GGA1	86.69	338	40	1	2	334	5053234	5053571	9e-112	407	1	S
NorthernBobwhite_ScaffoldedDeNovo_contig_26094	gi|358485511|ref|NC_006088.3 | GGA1	84.26	5230	571	59	5766	10861	5053716	5058827	0	5683	4795	M
NorthernBobwhite_ScaffoldedDeNovo_contig_48703	gi|358485511|ref|NC_006088.3 | GGA1	82.53	3589	464	31	5065	8557	5069869	5066348	0	3653	8743	M
NorthernBobwhite_ScaffoldedDeNovo_contig_30830	gi|358485511|ref|NC_006088.3 | GGA1	87.86	1408	134	8	10	1392	5075524	5076919	0	1766	1	S
NorthernBobwhite_ScaffoldedDeNovo_contig_198260	gi|358485511|ref|NC_006088.3 | GGA1	90.46	839	68	8	1	831	5077818	5076984	0	1128	1	S
NorthernBobwhite_ScaffoldedDeNovo_contig_22475	gi|358485511|ref|NC_006088.3 | GGA1	83.22	292	36	4	27	307	5084137	5083848	9e-80	300	1	S
NorthernBobwhite_ScaffoldedDeNovo_contig_205278	gi|358485511|ref|NC_006088.3 | GGA1	81.23	373	54	7	1	368	5087872	5087511	1e-91	340	1	S
NorthernBobwhite_ScaffoldedDeNovo_contig_215525	gi|358485511|ref|NC_006088.3 | GGA1	84.11	321	44	2	1	314	5092614	5092934	7e-94	347	1	S
NorthernBobwhite_ScaffoldedDeNovo_contig_144614	gi|358485511|ref|NC_006088.3 | GGA1	84.74	321	42	2	3	316	5092934	5092614	1e-96	356	1	S
NorthernBobwhite_ScaffoldedDeNovo_contig_1817	gi|358485511|ref|NC_006088.3 | GGA1	82.26	5788	677	79	69053	74648	5098540	5092911	0	5768	99829	M
NorthernBobwhite_ScaffoldedDeNovo_contig_89022	gi|358485511|ref|NC_006088.3 | GGA1	83.29	1825	248	18	1	1786	5102143	5100337	0	1887	35	M
NorthernBobwhite_ScaffoldedDeNovo_contig_62704	gi|358485511|ref|NC_006088.3 | GGA1	82.76	58	6	1	721	778	5118978	5119031	3e-06	59	106	M
NorthernBobwhite_ScaffoldedDeNovo_contig_180808	gi|358485511|ref|NC_006088.3 | GGA1	96.97	33	1	0	102	134	5118992	5119024	2e-05	55.4	66	M
NorthernBobwhite_ScaffoldedDeNovo_contig_187701	gi|358485511|ref|NC_006088.3 | GGA1	76.53	375	52	5	1	343	5124593	5124963	2e-76	289	1	S
NorthernBobwhite_ScaffoldedDeNovo_contig_187702	gi|358485511|ref|NC_006088.3 | GGA1	76.53	375	53	5	1	344	5124593	5124963	2e-76	289	1	S
NorthernBobwhite_ScaffoldedDeNovo_contig_218621	gi|358485511|ref|NC_006088.3 | GGA1	85	40	4	2	79	118	5151721	5151758	0.55	39.2	20	M
NorthernBobwhite_ScaffoldedDeNovo_contig_214898	gi|358485511|ref|NC_006088.3 | GGA1	100	23	0	0	303	325	5154624	5154602	0.057	42.8	61	M
NorthernBobwhite_ScaffoldedDeNovo_contig_193592	gi|358485511|ref|NC_006088.3 | GGA1	79.37	475	57	4	33	468	5154873	5155345	1e-119	434	1	S
NorthernBobwhite_ScaffoldedDeNovo_contig_113013	gi|358485511|ref|NC_006088.3 | GGA1	82.39	528	69	3	1	506	5155345	5154820	3e-152	542	1	S
NorthernBobwhite_ScaffoldedDeNovo_contig_159017	gi|358485511|ref|NC_006088.3 | GGA1	77.1	428	68	6	50	447	5159118	5159545	8e-89	331	1	S
NorthernBobwhite_ScaffoldedDeNovo_contig_205080	gi|358485511|ref|NC_006088.3 | GGA1	77.1	428	68	6	1	398	5159545	5159118	8e-89	331	1	S
NorthernBobwhite_ScaffoldedDeNovo_contig_106677	gi|358485511|ref|NC_006088.3 | GGA1	81.27	363	60	4	5	363	5169121	5168763	5e-91	338	4281	M
NorthernBobwhite_ScaffoldedDeNovo_contig_189161	gi|358485511|ref|NC_006088.3 | GGA1	80.22	364	63	4	4	363	5169121	5168763	4e-86	322	4149	M
NorthernBobwhite_ScaffoldedDeNovo_contig_198719	gi|358485511|ref|NC_006088.3 | GGA1	73.35	349	44	8	1	303	5169548	5169893	3e-55	219	1	S
NorthernBobwhite_ScaffoldedDeNovo_contig_205164	gi|358485511|ref|NC_006088.3 | GGA1	71.63	349	47	9	1	300	5169548	5169893	1e-46	190	1	S
NorthernBobwhite_ScaffoldedDeNovo_contig_199789	gi|358485511|ref|NC_006088.3 | GGA1	100	25	0	0	2	26	5169906	5169882	0.003	46.4	660	M
NorthernBobwhite_ScaffoldedDeNovo_contig_62147	gi|358485511|ref|NC_006088.3 | GGA1	90.32	31	3	0	153	183	5170995	5170965	0.044	42.8	99	M
NorthernBobwhite_ScaffoldedDeNovo_contig_14563	gi|358485511|ref|NC_006088.3 | GGA1	84.38	7258	784	75	2867	9947	5183318	5176234	0	7954	5484	M
NorthernBobwhite_ScaffoldedDeNovo_contig_128536	gi|358485511|ref|NC_006088.3 | GGA1	81.19	925	111	13	679	1579	5186667	5187552	0	883	154	M
NorthernBobwhite_ScaffoldedDeNovo_contig_134188	gi|358485511|ref|NC_006088.3 | GGA1	82.66	467	60	10	5	454	5188931	5188469	3e-125	452	193	M
NorthernBobwhite_ScaffoldedDeNovo_contig_164541	gi|358485511|ref|NC_006088.3 | GGA1	82.66	467	60	10	5	454	5188931	5188469	3e-125	452	186	M
NorthernBobwhite_ScaffoldedDeNovo_contig_67317	gi|358485511|ref|NC_006088.3 | GGA1	83.97	2121	227	17	1649	3710	5195982	5193916	0	2318	1021	M
NorthernBobwhite_ScaffoldedDeNovo_contig_122721	gi|358485511|ref|NC_006088.3 | GGA1	80.46	389	51	6	1	387	5213488	5213853	7e-96	354	1	S
NorthernBobwhite_ScaffoldedDeNovo_contig_113780	gi|358485511|ref|NC_006088.3 | GGA1	81.56	385	52	5	42	426	5213853	5213488	3e-100	369	1	S
NorthernBobwhite_ScaffoldedDeNovo_contig_169023	gi|358485511|ref|NC_006088.3 | GGA1	74.2	314	38	5	2	272	5222159	5221846	9e-55	217	1	S
NorthernBobwhite_ScaffoldedDeNovo_contig_29460	gi|358485511|ref|NC_006088.3 | GGA1	83.59	7476	872	74	28889	36151	5227302	5234635	0	7948	34437	M
NorthernBobwhite_ScaffoldedDeNovo_contig_213144	gi|358485511|ref|NC_006088.3 | GGA1	83.67	49	8	0	876	924	5231915	5231867	7e-05	53.6	2339	M
NorthernBobwhite_ScaffoldedDeNovo_contig_202069	gi|358485511|ref|NC_006088.3 | GGA1	85.71	469	53	3	10	478	5237776	5238230	8e-153	544	1	S
NorthernBobwhite_ScaffoldedDeNovo_contig_59002	gi|358485511|ref|NC_006088.3 | GGA1	88.05	293	32	2	8	300	5238496	5238207	3e-99	365	1	S
NorthernBobwhite_ScaffoldedDeNovo_contig_7924	gi|358485511|ref|NC_006088.3 | GGA1	83.33	2580	334	27	216	2732	5246683	5249229	0	2679	10727	M
NorthernBobwhite_ScaffoldedDeNovo_contig_188712	gi|358485511|ref|NC_006088.3 | GGA1	78.1	315	45	6	5	306	5250877	5250574	7e-65	251	1	S
NorthernBobwhite_ScaffoldedDeNovo_contig_85784	gi|358485511|ref|NC_006088.3 | GGA1	79.05	315	42	6	5	306	5250877	5250574	3e-69	266	1	S
NorthernBobwhite_ScaffoldedDeNovo_contig_176576	gi|358485511|ref|NC_006088.3 | GGA1	83.14	783	61	7	1	714	5251636	5250856	0	850	1	S
NorthernBobwhite_ScaffoldedDeNovo_contig_148853	gi|358485511|ref|NC_006088.3 | GGA1	84.99	573	76	4	1	566	5254290	5253721	0	637	1	S
NorthernBobwhite_ScaffoldedDeNovo_contig_81032	gi|358485511|ref|NC_006088.3 | GGA1	91.1	337	24	3	1	334	5254807	5255140	4e-128	464	2	S
NorthernBobwhite_ScaffoldedDeNovo_contig_36626	gi|358485511|ref|NC_006088.3 | GGA1	84.01	563	71	5	1	553	5255873	5255320	3e-171	605	1	S
NorthernBobwhite_ScaffoldedDeNovo_contig_88489	gi|358485511|ref|NC_006088.3 | GGA1	83.33	342	43	6	2	335	5257933	5257598	3e-93	345	1	S
NorthernBobwhite_ScaffoldedDeNovo_contig_180368	gi|358485511|ref|NC_006088.3 | GGA1	79.46	370	49	5	1	345	5259850	5259483	9e-88	327	1	S
NorthernBobwhite_ScaffoldedDeNovo_contig_132578	gi|358485511|ref|NC_006088.3 | GGA1	87	377	22	3	1	353	5259976	5260349	1e-130	470	1	S
NorthernBobwhite_ScaffoldedDeNovo_contig_88490	gi|358485511|ref|NC_006088.3 | GGA1	87.22	313	29	2	271	572	5260671	5260983	5e-105	385	2	S
NorthernBobwhite_ScaffoldedDeNovo_contig_170680	gi|358485511|ref|NC_006088.3 | GGA1	72.75	411	66	8	6	371	5262201	5261792	3e-62	242	1	S
NorthernBobwhite_ScaffoldedDeNovo_contig_16246	gi|358485511|ref|NC_006088.3 | GGA1	81.87	1230	143	18	5	1172	5264249	5263038	0	1204	70	M
NorthernBobwhite_ScaffoldedDeNovo_contig_122938	gi|358485511|ref|NC_006088.3 | GGA1	81.67	1162	139	21	508	1636	5265458	5264338	0	1108	2	S
NorthernBobwhite_ScaffoldedDeNovo_contig_39638	gi|358485511|ref|NC_006088.3 | GGA1	82.08	2662	335	32	4506	7057	5269398	5266769	0	2634	8233	M
NorthernBobwhite_ScaffoldedDeNovo_contig_145782	gi|358485511|ref|NC_006088.3 | GGA1	84.45	1325	150	12	3	1306	5272433	5271144	0	1458	1	S
NorthernBobwhite_ScaffoldedDeNovo_contig_181648	gi|358485511|ref|NC_006088.3 | GGA1	81.42	253	38	2	57	300	5272664	5272916	6e-63	244	1	S
NorthernBobwhite_ScaffoldedDeNovo_contig_196685	gi|358485511|ref|NC_006088.3 | GGA1	82.21	253	36	2	1	244	5272916	5272664	1e-65	253	1	S
NorthernBobwhite_ScaffoldedDeNovo_contig_45184	gi|358485511|ref|NC_006088.3 | GGA1	82.03	6054	730	70	1	5827	5280207	5274285	0	6020	18473	M
NorthernBobwhite_ScaffoldedDeNovo_contig_109109	gi|358485511|ref|NC_006088.3 | GGA1	84.44	45	5	1	209	253	5286413	5286455	0.002	48.2	264	M
NorthernBobwhite_ScaffoldedDeNovo_contig_129475	gi|358485511|ref|NC_006088.3 | GGA1	89.78	186	16	2	6	189	5305248	5305064	2e-62	244	1121	M
NorthernBobwhite_ScaffoldedDeNovo_contig_174569	gi|358485511|ref|NC_006088.3 | GGA1	80.22	369	68	5	5	371	5309488	5309123	3e-86	322	12030	M
NorthernBobwhite_ScaffoldedDeNovo_contig_174570	gi|358485511|ref|NC_006088.3 | GGA1	82.38	369	59	5	4	369	5309488	5309123	2e-96	356	14615	M
NorthernBobwhite_ScaffoldedDeNovo_contig_71850	gi|358485511|ref|NC_006088.3 | GGA1	84.3	363	31	5	1	337	5313952	5314314	1e-109	399	1	S
NorthernBobwhite_ScaffoldedDeNovo_contig_183639	gi|358485511|ref|NC_006088.3 | GGA1	84.36	358	32	5	1	335	5314308	5313952	2e-107	392	1	S
NorthernBobwhite_ScaffoldedDeNovo_contig_203103	gi|358485511|ref|NC_006088.3 | GGA1	80.6	67	8	3	157	218	5320030	5319964	4e-05	53.6	644	M
NorthernBobwhite_ScaffoldedDeNovo_contig_2778	gi|358485511|ref|NC_006088.3 | GGA1	83.16	8771	1070	90	58794	67280	5327890	5319243	0	9120	44075	M
NorthernBobwhite_ScaffoldedDeNovo_contig_95469	gi|358485511|ref|NC_006088.3 | GGA1	84.28	668	93	6	4	664	5327966	5328628	0	715	1	S
NorthernBobwhite_ScaffoldedDeNovo_contig_106928	gi|358485511|ref|NC_006088.3 | GGA1	80.3	335	54	5	5	333	5328300	5328628	4e-78	295	1	S
NorthernBobwhite_ScaffoldedDeNovo_contig_172062	gi|358485511|ref|NC_006088.3 | GGA1	77.22	632	93	9	3	592	5351102	5351724	1e-138	497	1	S
NorthernBobwhite_ScaffoldedDeNovo_contig_46650	gi|358485511|ref|NC_006088.3 | GGA1	83.67	251	25	4	2	237	5355369	5355120	9e-69	264	3912	M
NorthernBobwhite_ScaffoldedDeNovo_contig_75801	gi|358485511|ref|NC_006088.3 | GGA1	78.39	1106	185	21	1	1075	5361854	5360772	0	883	6838	M
NorthernBobwhite_ScaffoldedDeNovo_contig_90449	gi|358485511|ref|NC_006088.3 | GGA1	86.96	437	49	2	1	437	5370823	5371251	2e-148	529	1	S
NorthernBobwhite_ScaffoldedDeNovo_contig_56914	gi|358485511|ref|NC_006088.3 | GGA1	84.92	796	95	6	327	1108	5392844	5393628	0	890	2	S
NorthernBobwhite_ScaffoldedDeNovo_contig_19286	gi|358485511|ref|NC_006088.3 | GGA1	85.79	3814	386	29	8561	12287	5402761	5399017	0	4444	15772	M
NorthernBobwhite_ScaffoldedDeNovo_contig_215903	gi|358485511|ref|NC_006088.3 | GGA1	84.77	151	23	0	1	151	5412181	5412331	6e-40	168	1	S
NorthernBobwhite_ScaffoldedDeNovo_contig_186937	gi|358485511|ref|NC_006088.3 | GGA1	84.77	151	23	0	295	445	5412331	5412181	6e-40	168	1	S
NorthernBobwhite_ScaffoldedDeNovo_contig_80775	gi|358485511|ref|NC_006088.3 | GGA1	77.01	261	35	4	1	246	5415435	5415185	6e-51	205	204	M
NorthernBobwhite_ScaffoldedDeNovo_contig_80776	gi|358485511|ref|NC_006088.3 | GGA1	74.43	262	38	4	1	242	5415435	5415183	2e-43	179	402	M
NorthernBobwhite_ScaffoldedDeNovo_contig_191730	gi|358485511|ref|NC_006088.3 | GGA1	79.03	62	11	2	509	569	5424490	5424430	0.01	46.4	68	M
NorthernBobwhite_ScaffoldedDeNovo_contig_25850	gi|358485511|ref|NC_006088.3 | GGA1	83.97	6501	697	68	13312	19616	5425189	5431540	0	7030	53012	M
NorthernBobwhite_ScaffoldedDeNovo_contig_126104	gi|358485511|ref|NC_006088.3 | GGA1	77.71	323	34	4	1	297	5439087	5439397	4e-72	275	1	S
NorthernBobwhite_ScaffoldedDeNovo_contig_217964	gi|358485511|ref|NC_006088.3 | GGA1	77.4	323	35	4	1	297	5439087	5439397	2e-70	269	1	S
NorthernBobwhite_ScaffoldedDeNovo_contig_36057	gi|358485511|ref|NC_006088.3 | GGA1	92.86	28	2	0	946	973	5456065	5456092	0.14	42.8	73	M
NorthernBobwhite_ScaffoldedDeNovo_contig_127840	gi|358485511|ref|NC_006088.3 | GGA1	76.9	303	45	2	1	303	5461833	5461556	6e-63	244	756	M
NorthernBobwhite_ScaffoldedDeNovo_contig_57125	gi|358485511|ref|NC_006088.3 | GGA1	83.11	450	69	2	341	783	5462257	5461808	3e-129	466	1303	M
NorthernBobwhite_ScaffoldedDeNovo_contig_74595	gi|358485511|ref|NC_006088.3 | GGA1	81.2	367	47	6	31	377	5462716	5463080	1e-92	343	1	S
NorthernBobwhite_ScaffoldedDeNovo_contig_152134	gi|358485511|ref|NC_006088.3 | GGA1	91.95	435	30	1	4	438	5463058	5463487	9e-178	627	160	M
NorthernBobwhite_ScaffoldedDeNovo_contig_43589	gi|358485511|ref|NC_006088.3 | GGA1	78.75	367	45	5	1	336	5463080	5462716	4e-85	318	1	S
NorthernBobwhite_ScaffoldedDeNovo_contig_93119	gi|358485511|ref|NC_006088.3 | GGA1	88.89	36	4	0	373	408	5463755	5463790	0.002	48.2	20	M
NorthernBobwhite_ScaffoldedDeNovo_contig_43588	gi|358485511|ref|NC_006088.3 | GGA1	88.39	5288	452	32	2098	7297	5465088	5470301	0	6771	724	M
NorthernBobwhite_ScaffoldedDeNovo_contig_203336	gi|358485511|ref|NC_006088.3 | GGA1	80.4	449	50	11	6	428	5472858	5472422	6e-109	398	1	S
NorthernBobwhite_ScaffoldedDeNovo_contig_213540	gi|358485511|ref|NC_006088.3 | GGA1	71.77	379	43	10	31	364	5472890	5473249	1e-53	214	1	S
NorthernBobwhite_ScaffoldedDeNovo_contig_181187	gi|358485511|ref|NC_006088.3 | GGA1	70.63	378	48	8	34	369	5472893	5473249	2e-50	203	1	S
NorthernBobwhite_ScaffoldedDeNovo_contig_141097	gi|358485511|ref|NC_006088.3 | GGA1	80.27	1338	189	14	1	1295	5474677	5475982	0	1227	4273	M
NorthernBobwhite_ScaffoldedDeNovo_contig_134468	gi|358485511|ref|NC_006088.3 | GGA1	72.37	380	51	9	2	342	5474701	5474337	8e-56	221	1	S
NorthernBobwhite_ScaffoldedDeNovo_contig_193172	gi|358485511|ref|NC_006088.3 | GGA1	75.72	383	50	8	2	359	5474701	5474337	4e-72	275	1	S
NorthernBobwhite_ScaffoldedDeNovo_contig_184997	gi|358485511|ref|NC_006088.3 | GGA1	88.03	543	41	2	1	519	5494999	5495541	0	699	1	S
NorthernBobwhite_ScaffoldedDeNovo_contig_26690	gi|358485511|ref|NC_006088.3 | GGA1	87.01	4510	425	41	13408	17794	5505335	5500864	0	5452	26210	M
NorthernBobwhite_ScaffoldedDeNovo_contig_188591	gi|358485511|ref|NC_006088.3 | GGA1	87.67	300	27	4	12	306	5507442	5507736	3e-99	365	1	S
NorthernBobwhite_ScaffoldedDeNovo_contig_171886	gi|358485511|ref|NC_006088.3 | GGA1	82.33	266	46	1	69	334	5518727	5518463	7e-69	264	7208	M
NorthernBobwhite_ScaffoldedDeNovo_contig_137027	gi|358485511|ref|NC_006088.3 | GGA1	81.06	301	54	3	8	306	5518972	5519271	4e-72	275	947	M
NorthernBobwhite_ScaffoldedDeNovo_contig_191045	gi|358485511|ref|NC_006088.3 | GGA1	77.75	346	57	1	6	351	5519178	5519503	5e-77	291	857	M
NorthernBobwhite_ScaffoldedDeNovo_contig_54385	gi|358485511|ref|NC_006088.3 | GGA1	71.21	844	167	14	20	805	5519280	5518455	7e-119	432	6095	M
NorthernBobwhite_ScaffoldedDeNovo_contig_166015	gi|358485511|ref|NC_006088.3 | GGA1	83.4	265	37	2	355	612	5519760	5519496	2e-72	277	8225	M
NorthernBobwhite_ScaffoldedDeNovo_contig_32370	gi|358485511|ref|NC_006088.3 | GGA1	76.97	521	82	12	246	749	5520238	5519739	3e-103	379	1678	M
NorthernBobwhite_ScaffoldedDeNovo_contig_193107	gi|358485511|ref|NC_006088.3 | GGA1	91.14	350	30	1	21	369	5523393	5523044	4e-136	488	1	S
NorthernBobwhite_ScaffoldedDeNovo_contig_165354	gi|358485511|ref|NC_006088.3 | GGA1	95.96	495	16	2	1	492	5528538	5529031	0	798	1	S
NorthernBobwhite_ScaffoldedDeNovo_contig_162371	gi|358485511|ref|NC_006088.3 | GGA1	83.82	340	40	6	5	336	5530857	5531189	2e-95	352	621	M
NorthernBobwhite_ScaffoldedDeNovo_contig_166584	gi|358485511|ref|NC_006088.3 | GGA1	81.85	303	24	2	1	303	5531168	5531439	3e-85	318	1	S
NorthernBobwhite_ScaffoldedDeNovo_contig_86335	gi|358485511|ref|NC_006088.3 | GGA1	93.53	1097	63	3	1	1096	5531414	5532503	0	1653	1	S
NorthernBobwhite_ScaffoldedDeNovo_contig_162372	gi|358485511|ref|NC_006088.3 | GGA1	82.55	298	24	2	1	298	5531437	5531168	9e-86	320	1	S
NorthernBobwhite_ScaffoldedDeNovo_contig_88328	gi|358485511|ref|NC_006088.3 | GGA1	83.09	278	33	2	1	278	5532811	5533074	1e-77	293	1	S
NorthernBobwhite_ScaffoldedDeNovo_contig_6616	gi|358485511|ref|NC_006088.3 | GGA1	87	4540	444	33	1	4430	5541718	5537215	0	5510	18005	M
NorthernBobwhite_ScaffoldedDeNovo_contig_76786	gi|358485511|ref|NC_006088.3 | GGA1	86.99	3606	329	35	1	3538	5545383	5541850	0	4358	1	S
NorthernBobwhite_ScaffoldedDeNovo_contig_58160	gi|358485511|ref|NC_006088.3 | GGA1	83.51	558	70	4	211	748	5549745	5550300	8e-168	594	103	M
NorthernBobwhite_ScaffoldedDeNovo_contig_18784	gi|358485511|ref|NC_006088.3 | GGA1	88.66	7999	663	53	1743	9573	5562574	5554652	0	10320	4363	M
NorthernBobwhite_ScaffoldedDeNovo_contig_191315	gi|358485511|ref|NC_006088.3 | GGA1	92.44	476	30	3	1	474	5564615	5565086	0	688	1	S
NorthernBobwhite_ScaffoldedDeNovo_contig_83876	gi|358485511|ref|NC_006088.3 | GGA1	86.67	2453	201	19	174	2523	5567691	5565262	0	2978	148	M
NorthernBobwhite_ScaffoldedDeNovo_contig_86117	gi|358485511|ref|NC_006088.3 | GGA1	77.82	284	45	6	1	269	5572354	5572634	8e-55	217	1	S
NorthernBobwhite_ScaffoldedDeNovo_contig_11514	gi|358485511|ref|NC_006088.3 | GGA1	88.75	10476	869	69	13439	23694	5581168	5591553	0	13550	107813	M
NorthernBobwhite_ScaffoldedDeNovo_contig_167008	gi|358485511|ref|NC_006088.3 | GGA1	87.4	381	46	2	2	381	5598544	5598923	5e-129	464	1	S
NorthernBobwhite_ScaffoldedDeNovo_contig_59754	gi|358485511|ref|NC_006088.3 | GGA1	87.66	381	43	3	1	378	5598923	5598544	1e-129	466	1	S
NorthernBobwhite_ScaffoldedDeNovo_contig_60315	gi|358485511|ref|NC_006088.3 | GGA1	92.39	197	13	1	1	197	5605021	5605215	4e-75	286	2	S
NorthernBobwhite_ScaffoldedDeNovo_contig_75379	gi|358485511|ref|NC_006088.3 | GGA1	86.27	590	71	6	70	652	5615813	5615227	0	681	1	S
NorthernBobwhite_ScaffoldedDeNovo_contig_80782	gi|358485511|ref|NC_006088.3 | GGA1	78.28	571	70	6	14	562	5618157	5618695	1e-137	493	1	S
NorthernBobwhite_ScaffoldedDeNovo_contig_80783	gi|358485511|ref|NC_006088.3 | GGA1	79.08	545	71	6	21	554	5618183	5618695	9e-134	480	1	S
NorthernBobwhite_ScaffoldedDeNovo_contig_38942	gi|358485511|ref|NC_006088.3 | GGA1	83.78	37	6	0	464	500	5623291	5623255	0.25	41	9	M
NorthernBobwhite_ScaffoldedDeNovo_contig_204580	gi|358485511|ref|NC_006088.3 | GGA1	88.57	35	4	0	266	300	5627262	5627228	0.003	46.4	42	M
NorthernBobwhite_ScaffoldedDeNovo_contig_189107	gi|358485511|ref|NC_006088.3 | GGA1	75.41	61	13	1	83	141	5627278	5627218	0.32	41	7	M
NorthernBobwhite_ScaffoldedDeNovo_contig_166331	gi|358485511|ref|NC_006088.3 | GGA1	77.42	62	12	1	102	161	5628059	5628120	0.004	46.4	103	M
NorthernBobwhite_ScaffoldedDeNovo_contig_45674	gi|358485511|ref|NC_006088.3 | GGA1	84.62	52	6	2	440	491	5630676	5630627	0.0005	51.8	15	M
NorthernBobwhite_ScaffoldedDeNovo_contig_105822	gi|358485511|ref|NC_006088.3 | GGA1	81.09	386	57	5	1	373	5657189	5656807	1e-97	360	1	S
NorthernBobwhite_ScaffoldedDeNovo_contig_105823	gi|358485511|ref|NC_006088.3 | GGA1	80.57	386	59	5	1	373	5657189	5656807	7e-95	351	1	S
NorthernBobwhite_ScaffoldedDeNovo_contig_106818	gi|358485511|ref|NC_006088.3 | GGA1	93.21	162	11	0	1	162	5664226	5664387	3e-62	242	1295	M
NorthernBobwhite_ScaffoldedDeNovo_contig_115218	gi|358485511|ref|NC_006088.3 | GGA1	89.76	293	29	1	1	292	5676698	5676990	1e-106	390	7619	M
NorthernBobwhite_ScaffoldedDeNovo_contig_130633	gi|358485511|ref|NC_006088.3 | GGA1	87.38	975	87	5	2	940	5724871	5723897	0	1214	1	S
NorthernBobwhite_ScaffoldedDeNovo_contig_194230	gi|358485511|ref|NC_006088.3 | GGA1	92.68	41	2	1	1000	1040	5759008	5759047	7e-06	57.2	34	M
NorthernBobwhite_ScaffoldedDeNovo_contig_201869	gi|358485511|ref|NC_006088.3 | GGA1	84.09	44	5	1	27	70	5762802	5762761	0.003	46.4	187	M
NorthernBobwhite_ScaffoldedDeNovo_contig_192806	gi|358485511|ref|NC_006088.3 | GGA1	82.78	511	67	5	1	492	5764833	5764325	3e-146	522	1	S
NorthernBobwhite_ScaffoldedDeNovo_contig_192807	gi|358485511|ref|NC_006088.3 | GGA1	82.39	511	69	5	1	492	5764833	5764325	1e-143	513	1	S
NorthernBobwhite_ScaffoldedDeNovo_contig_47132	gi|358485511|ref|NC_006088.3 | GGA1	92.99	670	29	4	3	656	5767765	5767098	0	994	450	M
NorthernBobwhite_ScaffoldedDeNovo_contig_74396	gi|358485511|ref|NC_006088.3 | GGA1	86	50	6	1	1533	1582	5784667	5784715	0.0003	55.4	321	M
NorthernBobwhite_ScaffoldedDeNovo_contig_120718	gi|358485511|ref|NC_006088.3 | GGA1	91.11	45	2	1	2123	2167	5785581	5785623	2e-06	60.8	58	M
NorthernBobwhite_ScaffoldedDeNovo_contig_17039	gi|358485511|ref|NC_006088.3 | GGA1	91.58	14079	850	80	43581	57451	5803892	5789941	0	19990	56943	M
NorthernBobwhite_ScaffoldedDeNovo_contig_70631	gi|358485511|ref|NC_006088.3 | GGA1	100	21	0	0	167	187	5818613	5818593	1.1	39.2	11	M
NorthernBobwhite_ScaffoldedDeNovo_contig_48937	gi|358485511|ref|NC_006088.3 | GGA1	77.55	530	111	5	1	526	5827350	5827875	9e-111	405	9455	M
NorthernBobwhite_ScaffoldedDeNovo_contig_163630	gi|358485511|ref|NC_006088.3 | GGA1	80	235	38	6	17	244	5827662	5827894	1e-47	194	4825	M
NorthernBobwhite_ScaffoldedDeNovo_contig_23149	gi|358485511|ref|NC_006088.3 | GGA1	88.58	2040	127	22	17669	19640	5847691	5845690	0	2625	79754	M
NorthernBobwhite_ScaffoldedDeNovo_contig_122419	gi|358485511|ref|NC_006088.3 | GGA1	84.76	361	50	2	207	562	5854232	5854592	2e-109	399	2	S
NorthernBobwhite_ScaffoldedDeNovo_contig_127132	gi|358485511|ref|NC_006088.3 | GGA1	77.95	322	44	3	14	308	5857728	5858049	4e-71	271	1	S
NorthernBobwhite_ScaffoldedDeNovo_contig_142215	gi|358485511|ref|NC_006088.3 | GGA1	77.64	322	45	3	14	308	5857728	5858049	5e-70	268	1	S
NorthernBobwhite_ScaffoldedDeNovo_contig_117446	gi|358485511|ref|NC_006088.3 | GGA1	76.38	381	61	3	154	521	5860968	5860604	7e-78	295	2	S
NorthernBobwhite_ScaffoldedDeNovo_contig_73306	gi|358485511|ref|NC_006088.3 | GGA1	77.93	376	58	4	154	515	5860968	5860604	3e-82	309	2	S
NorthernBobwhite_ScaffoldedDeNovo_contig_56413	gi|358485511|ref|NC_006088.3 | GGA1	84.64	703	87	8	1	694	5861406	5862096	0	764	1	S
NorthernBobwhite_ScaffoldedDeNovo_contig_47508	gi|358485511|ref|NC_006088.3 | GGA1	86.12	807	96	5	3	802	5870605	5871402	0	942	1	S
NorthernBobwhite_ScaffoldedDeNovo_contig_175733	gi|358485511|ref|NC_006088.3 | GGA1	88.98	127	14	0	334	460	5871503	5871377	2e-39	167	1	S
NorthernBobwhite_ScaffoldedDeNovo_contig_185231	gi|358485511|ref|NC_006088.3 | GGA1	88.98	127	12	1	331	455	5871503	5871377	3e-38	163	1	S
NorthernBobwhite_ScaffoldedDeNovo_contig_103299	gi|358485511|ref|NC_006088.3 | GGA1	84.76	479	55	2	1	462	5872773	5873250	3e-152	542	1	S
NorthernBobwhite_ScaffoldedDeNovo_contig_202320	gi|358485511|ref|NC_006088.3 | GGA1	82.67	479	54	3	1	451	5872773	5873250	2e-140	502	1	S
NorthernBobwhite_ScaffoldedDeNovo_contig_19565	gi|358485511|ref|NC_006088.3 | GGA1	87.91	5966	473	51	51003	56844	5896515	5902356	0	7503	39899	M
NorthernBobwhite_ScaffoldedDeNovo_contig_85267	gi|358485511|ref|NC_006088.3 | GGA1	76.89	463	72	10	1	439	5910299	5909848	2e-91	340	1	S
NorthernBobwhite_ScaffoldedDeNovo_contig_208283	gi|358485511|ref|NC_006088.3 | GGA1	80.76	499	48	6	1	460	5923798	5924287	6e-135	484	1	S
NorthernBobwhite_ScaffoldedDeNovo_contig_118299	gi|358485511|ref|NC_006088.3 | GGA1	81.45	496	42	7	6	457	5924287	5923798	1e-137	493	1	S
NorthernBobwhite_ScaffoldedDeNovo_contig_202374	gi|358485511|ref|NC_006088.3 | GGA1	85.12	168	24	1	123	290	5941360	5941194	1e-45	187	7381	M
NorthernBobwhite_ScaffoldedDeNovo_contig_32247	gi|358485511|ref|NC_006088.3 | GGA1	81.06	6468	802	92	1160	7363	5944774	5938466	0	6109	12682	M
NorthernBobwhite_ScaffoldedDeNovo_contig_108685	gi|358485511|ref|NC_006088.3 | GGA1	92	25	2	0	199	223	5945588	5945564	3.9	37.4	1	S
NorthernBobwhite_ScaffoldedDeNovo_contig_32248	gi|358485511|ref|NC_006088.3 | GGA1	79.47	2611	321	48	1	2491	5946742	5949257	0	2269	3	S
NorthernBobwhite_ScaffoldedDeNovo_contig_189060	gi|358485511|ref|NC_006088.3 | GGA1	77.56	508	60	6	4	474	5949290	5949780	1e-116	425	16	M
NorthernBobwhite_ScaffoldedDeNovo_contig_139329	gi|358485511|ref|NC_006088.3 | GGA1	83.73	381	55	2	2	376	5950576	5950955	4e-111	405	1	S
NorthernBobwhite_ScaffoldedDeNovo_contig_154344	gi|358485511|ref|NC_006088.3 | GGA1	79.3	483	74	6	228	694	5951217	5951689	2e-114	417	21015	M
NorthernBobwhite_ScaffoldedDeNovo_contig_992	gi|358485511|ref|NC_006088.3 | GGA1	83.71	4826	619	51	9548	14266	5971058	5966293	0	5081	29783	M
NorthernBobwhite_ScaffoldedDeNovo_contig_6079	gi|358485511|ref|NC_006088.3 | GGA1	82.57	9936	1095	131	4296	13809	5982799	5992519	0	10090	27363	M
NorthernBobwhite_ScaffoldedDeNovo_contig_52189	gi|358485511|ref|NC_006088.3 | GGA1	82.89	409	50	5	8	399	5995590	5995995	6e-115	417	1	S
NorthernBobwhite_ScaffoldedDeNovo_contig_102426	gi|358485511|ref|NC_006088.3 | GGA1	85.51	207	28	2	3	207	5997514	5997720	4e-59	232	1	S
NorthernBobwhite_ScaffoldedDeNovo_contig_174595	gi|358485511|ref|NC_006088.3 | GGA1	85.51	207	28	2	103	307	5997720	5997514	4e-59	232	1	S
NorthernBobwhite_ScaffoldedDeNovo_contig_36286	gi|358485511|ref|NC_006088.3 | GGA1	79.38	1489	191	24	1	1448	6002136	6000723	0	1297	1	S
NorthernBobwhite_ScaffoldedDeNovo_contig_164043	gi|358485511|ref|NC_006088.3 | GGA1	90.32	31	3	0	330	360	6011232	6011202	0.072	42.8	8	M
NorthernBobwhite_ScaffoldedDeNovo_contig_110674	gi|358485511|ref|NC_006088.3 | GGA1	86.25	429	55	3	2	427	6020184	6020611	3e-139	499	1	S
NorthernBobwhite_ScaffoldedDeNovo_contig_145965	gi|358485511|ref|NC_006088.3 | GGA1	76.88	359	52	9	3	346	6020588	6020930	9e-68	260	1	S
NorthernBobwhite_ScaffoldedDeNovo_contig_148103	gi|358485511|ref|NC_006088.3 | GGA1	84.24	184	19	2	117	290	6031349	6031166	9e-50	201	1	S
NorthernBobwhite_ScaffoldedDeNovo_contig_179905	gi|358485511|ref|NC_006088.3 | GGA1	81.94	155	27	1	1	155	6037687	6037840	1e-34	150	1134	M
NorthernBobwhite_ScaffoldedDeNovo_contig_186662	gi|358485511|ref|NC_006088.3 | GGA1	83.66	153	24	1	344	496	6037840	6037689	3e-37	159	1888	M
NorthernBobwhite_ScaffoldedDeNovo_contig_9387	gi|358485511|ref|NC_006088.3 | GGA1	80.69	4563	608	46	26084	30470	6063816	6059351	0	4296	11436	M
NorthernBobwhite_ScaffoldedDeNovo_contig_172046	gi|358485511|ref|NC_006088.3 | GGA1	80.04	451	59	6	6	442	6064012	6064445	4e-112	408	1	S
NorthernBobwhite_ScaffoldedDeNovo_contig_196409	gi|358485511|ref|NC_006088.3 | GGA1	84.05	257	26	3	1	242	6064424	6064680	4e-73	279	1	S
NorthernBobwhite_ScaffoldedDeNovo_contig_204561	gi|358485511|ref|NC_006088.3 | GGA1	85.21	257	24	2	1	243	6064424	6064680	1e-78	297	1	S
NorthernBobwhite_ScaffoldedDeNovo_contig_145313	gi|358485511|ref|NC_006088.3 | GGA1	79.16	427	62	7	10	423	6070237	6069825	4e-98	361	1	S
NorthernBobwhite_ScaffoldedDeNovo_contig_111338	gi|358485511|ref|NC_006088.3 | GGA1	83.39	313	31	5	1	304	6070517	6070817	6e-88	327	1	S
NorthernBobwhite_ScaffoldedDeNovo_contig_118807	gi|358485511|ref|NC_006088.3 | GGA1	91.34	127	11	0	357	483	6080236	6080110	4e-43	179	3	M
NorthernBobwhite_ScaffoldedDeNovo_contig_42788	gi|358485511|ref|NC_006088.3 | GGA1	81.58	543	69	10	1	515	6091038	6090499	5e-143	511	1	S
NorthernBobwhite_ScaffoldedDeNovo_contig_171565	gi|358485511|ref|NC_006088.3 | GGA1	81.06	227	31	5	231	448	6100355	6100578	8e-51	205	2	S
NorthernBobwhite_ScaffoldedDeNovo_contig_171566	gi|358485511|ref|NC_006088.3 | GGA1	86.41	537	54	6	1	522	6100553	6101085	7e-179	630	1	S
NorthernBobwhite_ScaffoldedDeNovo_contig_185103	gi|358485511|ref|NC_006088.3 | GGA1	83.87	186	28	2	1	186	6100578	6100395	1e-47	194	2	S
NorthernBobwhite_ScaffoldedDeNovo_contig_82652	gi|358485511|ref|NC_006088.3 | GGA1	93.1	29	2	0	224	252	6119262	6119234	0.013	44.6	77	M
NorthernBobwhite_ScaffoldedDeNovo_contig_12881	gi|358485511|ref|NC_006088.3 | GGA1	84.65	5369	587	70	36987	42183	6130502	6135805	0	5865	26247	M
NorthernBobwhite_ScaffoldedDeNovo_contig_173161	gi|358485511|ref|NC_006088.3 | GGA1	68.75	160	36	4	178	323	6134083	6133924	2e-06	59	24	M
NorthernBobwhite_ScaffoldedDeNovo_contig_80040	gi|358485511|ref|NC_006088.3 | GGA1	77.67	1393	198	19	1	1353	6136546	6137865	0	1126	1	S
NorthernBobwhite_ScaffoldedDeNovo_contig_61849	gi|358485511|ref|NC_006088.3 | GGA1	82.53	1362	178	20	462	1782	6138462	6139804	0	1348	2	S
NorthernBobwhite_ScaffoldedDeNovo_contig_43881	gi|358485511|ref|NC_006088.3 | GGA1	74.8	254	46	7	1	244	6140297	6140052	1e-35	154	112	M
NorthernBobwhite_ScaffoldedDeNovo_contig_41929	gi|358485511|ref|NC_006088.3 | GGA1	84.6	7346	837	69	6781	13989	6158368	6151180	0	8103	6662	M
NorthernBobwhite_ScaffoldedDeNovo_contig_114754	gi|358485511|ref|NC_006088.3 | GGA1	82.64	507	49	9	4	484	6162380	6162873	1e-143	513	1	S
NorthernBobwhite_ScaffoldedDeNovo_contig_47875	gi|358485511|ref|NC_006088.3 | GGA1	75.84	745	144	15	1	728	6165952	6166677	2e-138	497	7232	M
NorthernBobwhite_ScaffoldedDeNovo_contig_144903	gi|358485511|ref|NC_006088.3 | GGA1	71.39	332	28	5	335	601	6167678	6167349	1e-51	208	2	S
NorthernBobwhite_ScaffoldedDeNovo_contig_2346	gi|358485511|ref|NC_006088.3 | GGA1	81.77	6269	796	87	10589	16595	6175851	6169668	0	6073	20801	M
NorthernBobwhite_ScaffoldedDeNovo_contig_119390	gi|358485511|ref|NC_006088.3 | GGA1	88.89	36	3	1	730	765	6177576	6177542	0.049	44.6	100	M
NorthernBobwhite_ScaffoldedDeNovo_contig_131029	gi|358485511|ref|NC_006088.3 | GGA1	78.43	343	64	5	3	341	6181826	6181490	5e-71	271	1	S
NorthernBobwhite_ScaffoldedDeNovo_contig_134016	gi|358485511|ref|NC_006088.3 | GGA1	80.06	341	60	5	3	339	6181826	6181490	2e-77	293	1	S
NorthernBobwhite_ScaffoldedDeNovo_contig_148744	gi|358485511|ref|NC_006088.3 | GGA1	82.67	375	53	5	2	374	6184593	6184957	2e-101	372	1	S
NorthernBobwhite_ScaffoldedDeNovo_contig_31370	gi|358485511|ref|NC_006088.3 | GGA1	82.71	347	39	3	34	359	6188695	6189041	5e-98	361	1	S
NorthernBobwhite_ScaffoldedDeNovo_contig_154380	gi|358485511|ref|NC_006088.3 | GGA1	82.86	35	6	0	84	118	6196811	6196777	1.9	37.4	6	M
NorthernBobwhite_ScaffoldedDeNovo_contig_75170	gi|358485511|ref|NC_006088.3 | GGA1	79.82	1006	114	14	6	929	6200489	6201487	0	917	1	S
NorthernBobwhite_ScaffoldedDeNovo_contig_15546	gi|358485511|ref|NC_006088.3 | GGA1	82.34	4406	531	59	21509	25798	6205070	6209344	0	4396	42472	M
NorthernBobwhite_ScaffoldedDeNovo_contig_122046	gi|358485511|ref|NC_006088.3 | GGA1	86.26	313	40	2	1	312	6209319	6209629	3e-99	365	1	S
NorthernBobwhite_ScaffoldedDeNovo_contig_33762	gi|358485511|ref|NC_006088.3 | GGA1	76.69	532	71	9	1	494	6209604	6210120	4e-112	408	1	S
NorthernBobwhite_ScaffoldedDeNovo_contig_96342	gi|358485511|ref|NC_006088.3 | GGA1	86.26	313	40	2	1	312	6209629	6209319	3e-99	365	1	S
NorthernBobwhite_ScaffoldedDeNovo_contig_101085	gi|358485511|ref|NC_006088.3 | GGA1	85.14	915	105	9	1	900	6219353	6218455	0	1025	9024	M
NorthernBobwhite_ScaffoldedDeNovo_contig_179152	gi|358485511|ref|NC_006088.3 | GGA1	78.5	307	41	5	25	308	6222662	6222966	1e-66	257	1	S
NorthernBobwhite_ScaffoldedDeNovo_contig_149912	gi|358485511|ref|NC_006088.3 | GGA1	80.39	306	37	4	1	286	6222966	6222664	7e-75	284	1	S
NorthernBobwhite_ScaffoldedDeNovo_contig_84611	gi|358485511|ref|NC_006088.3 | GGA1	92.89	380	14	3	1	377	6223593	6223224	2e-158	562	1	S
NorthernBobwhite_ScaffoldedDeNovo_contig_5400	gi|358485511|ref|NC_006088.3 | GGA1	85.93	1755	186	24	1	1716	6225400	6223668	0	1999	19287	M
NorthernBobwhite_ScaffoldedDeNovo_contig_50446	gi|358485511|ref|NC_006088.3 | GGA1	84.6	2650	295	37	7450	10033	6230364	6227762	0	2875	23876	M
NorthernBobwhite_ScaffoldedDeNovo_contig_171640	gi|358485511|ref|NC_006088.3 | GGA1	81.95	277	47	2	1	274	6234436	6234712	7e-70	268	5350	M
NorthernBobwhite_ScaffoldedDeNovo_contig_24216	gi|358485511|ref|NC_006088.3 | GGA1	82.67	1489	189	15	448	1886	6240170	6238701	0	1517	2	S
NorthernBobwhite_ScaffoldedDeNovo_contig_209887	gi|358485511|ref|NC_006088.3 | GGA1	85.15	458	49	7	12	457	6244659	6245109	2e-141	506	1	S
NorthernBobwhite_ScaffoldedDeNovo_contig_14518	gi|358485511|ref|NC_006088.3 | GGA1	84.37	2649	294	29	8573	11121	6249138	6246510	0	2888	23886	M
NorthernBobwhite_ScaffoldedDeNovo_contig_197207	gi|358485511|ref|NC_006088.3 | GGA1	85.1	302	45	0	1	302	6251622	6251321	3e-92	342	1	S
NorthernBobwhite_ScaffoldedDeNovo_contig_80126	gi|358485511|ref|NC_006088.3 | GGA1	85.43	302	43	1	1	301	6251622	6251321	9e-93	343	1	S
NorthernBobwhite_ScaffoldedDeNovo_contig_171581	gi|358485511|ref|NC_006088.3 | GGA1	79.74	390	35	4	1	358	6257640	6257263	3e-100	369	1	S
NorthernBobwhite_ScaffoldedDeNovo_contig_109862	gi|358485511|ref|NC_006088.3 | GGA1	81.52	2056	265	30	1	1972	6258713	6260737	0	1963	1361	M
NorthernBobwhite_ScaffoldedDeNovo_contig_201339	gi|358485511|ref|NC_006088.3 | GGA1	85.28	598	82	4	6	602	6263176	6262584	0	670	10461	M
NorthernBobwhite_ScaffoldedDeNovo_contig_128331	gi|358485511|ref|NC_006088.3 | GGA1	84.2	734	87	5	1	705	6264056	6263323	0	805	1	S
NorthernBobwhite_ScaffoldedDeNovo_contig_27641	gi|358485511|ref|NC_006088.3 | GGA1	87.56	1351	105	13	1625	2938	6266144	6264820	0	1678	11979	M
NorthernBobwhite_ScaffoldedDeNovo_contig_86266	gi|358485511|ref|NC_006088.3 | GGA1	82.13	649	104	5	236	873	6267933	6268580	3e-180	636	1	S
NorthernBobwhite_ScaffoldedDeNovo_contig_22777	gi|358485511|ref|NC_006088.3 | GGA1	80.07	557	75	7	173	720	6267934	6267405	3e-141	506	1	S
NorthernBobwhite_ScaffoldedDeNovo_contig_25154	gi|358485511|ref|NC_006088.3 | GGA1	88.07	243	15	2	320	549	6268949	6269190	9e-83	311	2	S
NorthernBobwhite_ScaffoldedDeNovo_contig_22778	gi|358485511|ref|NC_006088.3 | GGA1	83.62	403	33	6	1	382	6269214	6269604	3e-119	432	1	S
NorthernBobwhite_ScaffoldedDeNovo_contig_24281	gi|358485511|ref|NC_006088.3 | GGA1	83.89	1831	213	22	13	1796	6269608	6271403	0	1947	2716	M
NorthernBobwhite_ScaffoldedDeNovo_contig_120976	gi|358485511|ref|NC_006088.3 | GGA1	87.07	642	60	7	1	625	6274561	6275196	0	773	1	S
NorthernBobwhite_ScaffoldedDeNovo_contig_4304	gi|358485511|ref|NC_006088.3 | GGA1	84.56	6860	723	68	18715	25387	6282007	6275297	0	7593	8310	M
NorthernBobwhite_ScaffoldedDeNovo_contig_140954	gi|358485511|ref|NC_006088.3 | GGA1	79.49	356	40	1	1	323	6289939	6289584	4e-91	338	1	S
NorthernBobwhite_ScaffoldedDeNovo_contig_193892	gi|358485511|ref|NC_006088.3 | GGA1	79.49	356	40	1	1	323	6289939	6289584	4e-91	338	1	S
NorthernBobwhite_ScaffoldedDeNovo_contig_171473	gi|358485511|ref|NC_006088.3 | GGA1	87.8	377	46	0	4	380	6294287	6294663	9e-132	473	1	S
NorthernBobwhite_ScaffoldedDeNovo_contig_170186	gi|358485511|ref|NC_006088.3 | GGA1	85.22	379	54	1	1	379	6294663	6294287	3e-118	428	1	S
NorthernBobwhite_ScaffoldedDeNovo_contig_118504	gi|358485511|ref|NC_006088.3 | GGA1	89.54	698	66	4	1	696	6298025	6298717	0	919	2	S
NorthernBobwhite_ScaffoldedDeNovo_contig_172490	gi|358485511|ref|NC_006088.3 | GGA1	84.88	615	79	9	3	607	6299063	6299673	0	663	3862	M
NorthernBobwhite_ScaffoldedDeNovo_contig_181556	gi|358485511|ref|NC_006088.3 | GGA1	82.6	615	80	9	1	592	6299063	6299673	8e-173	610	3179	M
NorthernBobwhite_ScaffoldedDeNovo_contig_186681	gi|358485511|ref|NC_006088.3 | GGA1	79.43	384	40	4	1	382	6300473	6300127	6e-96	354	1	S
NorthernBobwhite_ScaffoldedDeNovo_contig_204597	gi|358485511|ref|NC_006088.3 | GGA1	74.36	390	41	5	1	374	6300473	6300127	9e-75	284	1	S
NorthernBobwhite_ScaffoldedDeNovo_contig_84353	gi|358485511|ref|NC_006088.3 | GGA1	93.31	703	46	1	1	702	6301150	6300448	0	1052	1	S
NorthernBobwhite_ScaffoldedDeNovo_contig_104795	gi|358485511|ref|NC_006088.3 | GGA1	88.29	538	51	4	1	529	6324191	6324725	0	679	1	S
NorthernBobwhite_ScaffoldedDeNovo_contig_208763	gi|358485511|ref|NC_006088.3 | GGA1	90.52	538	47	2	13	549	6324725	6324191	0	735	1	S
NorthernBobwhite_ScaffoldedDeNovo_contig_12986	gi|358485511|ref|NC_006088.3 | GGA1	84.65	4149	497	42	13148	17202	6340470	6336368	0	4556	47434	M
NorthernBobwhite_ScaffoldedDeNovo_contig_136332	gi|358485511|ref|NC_006088.3 | GGA1	79.5	161	25	1	230	390	6343407	6343559	6e-33	145	1	S
NorthernBobwhite_ScaffoldedDeNovo_contig_206060	gi|358485511|ref|NC_006088.3 | GGA1	79.75	158	27	1	230	387	6343407	6343559	7e-32	141	1	S
NorthernBobwhite_ScaffoldedDeNovo_contig_205709	gi|358485511|ref|NC_006088.3 | GGA1	81.64	305	42	1	11	301	6349745	6350049	2e-81	306	2	M
NorthernBobwhite_ScaffoldedDeNovo_contig_164948	gi|358485511|ref|NC_006088.3 | GGA1	81.82	308	42	1	1	294	6350052	6349745	5e-83	311	2	M
NorthernBobwhite_ScaffoldedDeNovo_contig_119399	gi|358485511|ref|NC_006088.3 | GGA1	81.49	605	64	10	1	578	6352349	6351766	3e-165	585	1	S
NorthernBobwhite_ScaffoldedDeNovo_contig_157234	gi|358485511|ref|NC_006088.3 | GGA1	78.98	295	60	1	17	311	6361196	6360904	2e-64	250	3438	M
NorthernBobwhite_ScaffoldedDeNovo_contig_78929	gi|358485511|ref|NC_006088.3 | GGA1	90.31	320	28	1	1	317	6361834	6362153	2e-120	435	1	S
NorthernBobwhite_ScaffoldedDeNovo_contig_132700	gi|358485511|ref|NC_006088.3 | GGA1	90	320	29	1	2	318	6362153	6361834	2e-119	432	1	S
NorthernBobwhite_ScaffoldedDeNovo_contig_37854	gi|358485511|ref|NC_006088.3 | GGA1	87.02	339	42	2	1	338	6364318	6364655	9e-112	407	1	S
NorthernBobwhite_ScaffoldedDeNovo_contig_37853	gi|358485511|ref|NC_006088.3 | GGA1	87.32	339	41	2	1	338	6364655	6364318	8e-113	410	1	S
NorthernBobwhite_ScaffoldedDeNovo_contig_24793	gi|358485511|ref|NC_006088.3 | GGA1	89.78	509	40	5	2	503	6365568	6366071	0	672	978	M
NorthernBobwhite_ScaffoldedDeNovo_contig_52073	gi|358485511|ref|NC_006088.3 | GGA1	81.76	329	46	3	1	317	6383359	6383685	3e-86	322	1	S
NorthernBobwhite_ScaffoldedDeNovo_contig_9200	gi|358485511|ref|NC_006088.3 | GGA1	85.15	7381	888	63	33272	40539	6383671	6390956	0	8273	75173	M
NorthernBobwhite_ScaffoldedDeNovo_contig_190526	gi|358485511|ref|NC_006088.3 | GGA1	82.07	329	45	3	15	331	6383685	6383359	7e-88	327	1	S
NorthernBobwhite_ScaffoldedDeNovo_contig_120414	gi|358485511|ref|NC_006088.3 | GGA1	82.94	293	37	2	279	568	6392316	6392034	2e-80	306	68	M
NorthernBobwhite_ScaffoldedDeNovo_contig_77275	gi|358485511|ref|NC_006088.3 | GGA1	80.69	321	49	5	3	310	6393080	6393400	2e-76	289	1	S
NorthernBobwhite_ScaffoldedDeNovo_contig_171284	gi|358485511|ref|NC_006088.3 | GGA1	84.02	607	86	4	1	601	6393103	6392502	0	650	1	S
NorthernBobwhite_ScaffoldedDeNovo_contig_77276	gi|358485511|ref|NC_006088.3 | GGA1	79.38	325	45	5	2	308	6393400	6393080	2e-74	282	1	S
NorthernBobwhite_ScaffoldedDeNovo_contig_68002	gi|358485511|ref|NC_006088.3 | GGA1	84.65	6528	746	56	7489	13857	6401648	6408078	0	7234	45016	M
NorthernBobwhite_ScaffoldedDeNovo_contig_167034	gi|358485511|ref|NC_006088.3 | GGA1	81.17	308	42	5	1	295	6412732	6412428	5e-75	286	2	S
NorthernBobwhite_ScaffoldedDeNovo_contig_78756	gi|358485511|ref|NC_006088.3 | GGA1	85.88	177	23	2	14	190	6430669	6430843	4e-49	199	1	S
NorthernBobwhite_ScaffoldedDeNovo_contig_13055	gi|358485511|ref|NC_006088.3 | GGA1	86.04	4592	477	32	3503	7992	6430681	6426152	0	5395	13764	M
NorthernBobwhite_ScaffoldedDeNovo_contig_183944	gi|358485511|ref|NC_006088.3 | GGA1	86.44	177	22	2	271	447	6430843	6430669	8e-51	205	5	M
NorthernBobwhite_ScaffoldedDeNovo_contig_80625	gi|358485511|ref|NC_006088.3 | GGA1	83.71	1412	164	18	7784	9142	6432336	6430938	0	1489	7693	M
NorthernBobwhite_ScaffoldedDeNovo_contig_80624	gi|358485511|ref|NC_006088.3 | GGA1	85.16	775	88	6	1	748	6437425	6438199	0	877	1	S
NorthernBobwhite_ScaffoldedDeNovo_contig_146232	gi|358485511|ref|NC_006088.3 | GGA1	83.19	113	18	1	4	115	6439666	6439554	8e-24	114	2	S
NorthernBobwhite_ScaffoldedDeNovo_contig_101740	gi|358485511|ref|NC_006088.3 | GGA1	84.96	1130	146	8	6	1117	6440046	6438923	0	1258	9335	M
NorthernBobwhite_ScaffoldedDeNovo_contig_199210	gi|358485511|ref|NC_006088.3 | GGA1	87.3	315	23	4	6	305	6440046	6439734	3e-105	385	1	S
NorthernBobwhite_ScaffoldedDeNovo_contig_50463	gi|358485511|ref|NC_006088.3 | GGA1	89.12	3135	280	17	6601	9708	6444524	6441424	0	4094	5	M
NorthernBobwhite_ScaffoldedDeNovo_contig_106569	gi|358485511|ref|NC_006088.3 | GGA1	82.22	793	88	7	1	757	6446541	6447316	0	810	1	S
NorthernBobwhite_ScaffoldedDeNovo_contig_200635	gi|358485511|ref|NC_006088.3 | GGA1	80.2	788	103	9	5	753	6447314	6446541	0	726	1	S
NorthernBobwhite_ScaffoldedDeNovo_contig_62587	gi|358485511|ref|NC_006088.3 | GGA1	85.84	671	87	3	30	700	6450695	6451357	0	776	1	S
NorthernBobwhite_ScaffoldedDeNovo_contig_160020	gi|358485511|ref|NC_006088.3 | GGA1	85.77	492	55	5	1	487	6454248	6454729	8e-159	563	2	M
NorthernBobwhite_ScaffoldedDeNovo_contig_3690	gi|358485511|ref|NC_006088.3 | GGA1	83.46	2920	325	26	17067	19901	6454273	6451427	0	3113	13	M
NorthernBobwhite_ScaffoldedDeNovo_contig_128197	gi|358485511|ref|NC_006088.3 | GGA1	85.25	495	55	5	2	491	6454729	6454248	4e-157	558	2	M
NorthernBobwhite_ScaffoldedDeNovo_contig_69138	gi|358485511|ref|NC_006088.3 | GGA1	82.67	352	50	5	1	341	6456702	6456351	8e-94	347	4086	M
NorthernBobwhite_ScaffoldedDeNovo_contig_66926	gi|358485511|ref|NC_006088.3 | GGA1	83.43	356	49	6	1	347	6456705	6456351	4e-97	358	5877	M
NorthernBobwhite_ScaffoldedDeNovo_contig_151609	gi|358485511|ref|NC_006088.3 | GGA1	82.06	680	96	5	1	666	6457996	6458663	0	677	1	S
NorthernBobwhite_ScaffoldedDeNovo_contig_199648	gi|358485511|ref|NC_006088.3 | GGA1	88.04	418	49	1	8	425	6475012	6474596	2e-147	526	1	S
NorthernBobwhite_ScaffoldedDeNovo_contig_123214	gi|358485511|ref|NC_006088.3 | GGA1	89.62	655	42	10	1	643	6476014	6475374	0	854	1	S
NorthernBobwhite_ScaffoldedDeNovo_contig_6344	gi|358485511|ref|NC_006088.3 | GGA1	86.84	5503	527	45	5323	10677	6476106	6481559	0	6635	3786	M
NorthernBobwhite_ScaffoldedDeNovo_contig_196605	gi|358485511|ref|NC_006088.3 | GGA1	82.42	364	38	3	1	338	6481897	6481534	5e-103	378	1	S
NorthernBobwhite_ScaffoldedDeNovo_contig_196604	gi|358485511|ref|NC_006088.3 | GGA1	82.69	364	39	2	1	340	6481897	6481534	3e-105	385	1	S
NorthernBobwhite_ScaffoldedDeNovo_contig_95574	gi|358485511|ref|NC_006088.3 | GGA1	86.54	416	52	4	10	423	6491430	6491017	6e-135	484	1935	M
NorthernBobwhite_ScaffoldedDeNovo_contig_98329	gi|358485511|ref|NC_006088.3 | GGA1	75.89	419	63	9	7	387	6495951	6496369	5e-78	295	1	S
NorthernBobwhite_ScaffoldedDeNovo_contig_10314	gi|358485511|ref|NC_006088.3 | GGA1	87.02	3668	337	35	37678	41240	6495970	6492337	0	4437	36528	M
NorthernBobwhite_ScaffoldedDeNovo_contig_202208	gi|358485511|ref|NC_006088.3 | GGA1	79.95	414	47	5	1	378	6510418	6510831	1e-104	383	1	S
NorthernBobwhite_ScaffoldedDeNovo_contig_183614	gi|358485511|ref|NC_006088.3 | GGA1	85.02	414	44	3	7	402	6510831	6510418	1e-130	470	1	S
NorthernBobwhite_ScaffoldedDeNovo_contig_3721	gi|358485511|ref|NC_006088.3 | GGA1	84.79	5827	681	51	10827	16555	6542057	6547776	0	6469	7290	M
NorthernBobwhite_ScaffoldedDeNovo_contig_112648	gi|358485511|ref|NC_006088.3 | GGA1	81.34	268	38	3	385	647	6571271	6571011	8e-66	255	1	S
NorthernBobwhite_ScaffoldedDeNovo_contig_154919	gi|358485511|ref|NC_006088.3 | GGA1	73.47	1093	136	21	1	968	6604325	6603262	0	708	1	S
NorthernBobwhite_ScaffoldedDeNovo_contig_135666	gi|358485511|ref|NC_006088.3 | GGA1	83.72	43	4	2	293	335	6610584	6610623	0.19	41	14	M
NorthernBobwhite_ScaffoldedDeNovo_contig_73849	gi|358485511|ref|NC_006088.3 | GGA1	77.31	238	25	5	288	498	6614825	6614590	4e-46	190	1	S
NorthernBobwhite_ScaffoldedDeNovo_contig_191039	gi|358485511|ref|NC_006088.3 | GGA1	76.71	73	7	4	242	305	6618815	6618886	0.005	46.4	21	M
NorthernBobwhite_ScaffoldedDeNovo_contig_191823	gi|358485511|ref|NC_006088.3 | GGA1	71.56	538	92	12	2	490	6622665	6623190	4e-74	282	1	S
NorthernBobwhite_ScaffoldedDeNovo_contig_19586	gi|358485511|ref|NC_006088.3 | GGA1	78.97	3881	531	71	1	3661	6622683	6618868	0	3258	13	M
NorthernBobwhite_ScaffoldedDeNovo_contig_21046	gi|358485511|ref|NC_006088.3 | GGA1	86.42	2924	307	24	6149	9045	6626207	6623347	0	3456	4381	M
NorthernBobwhite_ScaffoldedDeNovo_contig_217221	gi|358485511|ref|NC_006088.3 | GGA1	70.83	168	49	0	68	235	6631137	6630970	4e-14	82.4	16	M
NorthernBobwhite_ScaffoldedDeNovo_contig_63472	gi|358485511|ref|NC_006088.3 | GGA1	87.49	887	76	9	4	877	6633436	6634300	0	1090	1	S
NorthernBobwhite_ScaffoldedDeNovo_contig_18355	gi|358485511|ref|NC_006088.3 | GGA1	87.29	1959	203	14	7479	9397	6636376	6634424	0	2388	12	M
NorthernBobwhite_ScaffoldedDeNovo_contig_124565	gi|358485511|ref|NC_006088.3 | GGA1	85.15	889	119	9	1	879	6644244	6643359	0	980	2	M
NorthernBobwhite_ScaffoldedDeNovo_contig_62644	gi|358485511|ref|NC_006088.3 | GGA1	85.17	1686	186	14	1	1634	6644577	6646250	0	1909	2	M
NorthernBobwhite_ScaffoldedDeNovo_contig_93562	gi|358485511|ref|NC_006088.3 | GGA1	78.04	419	59	8	1	394	6646636	6646226	4e-92	342	2	M
NorthernBobwhite_ScaffoldedDeNovo_contig_157431	gi|358485511|ref|NC_006088.3 | GGA1	83.13	486	62	5	1	469	6650024	6649542	2e-140	502	1	S
NorthernBobwhite_ScaffoldedDeNovo_contig_54422	gi|358485511|ref|NC_006088.3 | GGA1	85.62	1300	142	14	21	1310	6652366	6651102	0	1480	1	S
NorthernBobwhite_ScaffoldedDeNovo_contig_134371	gi|358485511|ref|NC_006088.3 | GGA1	85.42	343	39	1	1	332	6656825	6657167	2e-108	399	2	S
NorthernBobwhite_ScaffoldedDeNovo_contig_154728	gi|358485511|ref|NC_006088.3 | GGA1	75.56	491	55	7	1	429	6676662	6676175	3e-101	372	1	S
NorthernBobwhite_ScaffoldedDeNovo_contig_161650	gi|358485511|ref|NC_006088.3 | GGA1	80.04	501	57	3	1	458	6693536	6693036	3e-133	479	1	S
NorthernBobwhite_ScaffoldedDeNovo_contig_32160	gi|358485511|ref|NC_006088.3 | GGA1	88.48	5355	386	56	2651	7962	6709297	6704131	0	6832	43524	M
NorthernBobwhite_ScaffoldedDeNovo_contig_186723	gi|358485511|ref|NC_006088.3 | GGA1	91.05	380	23	3	1	372	6710870	6710494	1e-148	529	1	S
NorthernBobwhite_ScaffoldedDeNovo_contig_202068	gi|358485511|ref|NC_006088.3 | GGA1	83.37	409	37	4	12	399	6711658	6712056	5e-122	441	1	S
NorthernBobwhite_ScaffoldedDeNovo_contig_104423	gi|358485511|ref|NC_006088.3 | GGA1	90.14	142	13	1	1	142	6713480	6713340	2e-46	190	2	S
NorthernBobwhite_ScaffoldedDeNovo_contig_20535	gi|358485511|ref|NC_006088.3 | GGA1	86.51	6117	684	37	7877	13909	6719959	6713900	0	7272	218	M
NorthernBobwhite_ScaffoldedDeNovo_contig_156351	gi|358485511|ref|NC_006088.3 | GGA1	83.5	303	48	1	23	323	6727767	6727465	4e-85	318	1	S
NorthernBobwhite_ScaffoldedDeNovo_contig_156350	gi|358485511|ref|NC_006088.3 | GGA1	82.42	347	55	2	3	343	6727820	6727474	9e-94	347	1	S
NorthernBobwhite_ScaffoldedDeNovo_contig_160062	gi|358485511|ref|NC_006088.3 | GGA1	78.88	322	51	5	5	314	6736957	6736641	6e-70	268	2	M
NorthernBobwhite_ScaffoldedDeNovo_contig_116601	gi|358485511|ref|NC_006088.3 | GGA1	77.09	694	123	9	1	660	6737627	6736936	8e-148	527	2	M
NorthernBobwhite_ScaffoldedDeNovo_contig_38863	gi|358485511|ref|NC_006088.3 | GGA1	83.91	2785	306	29	10139	12841	6740047	6742771	0	3000	2699	M
NorthernBobwhite_ScaffoldedDeNovo_contig_3961	gi|358485511|ref|NC_006088.3 | GGA1	83.97	4992	520	47	24879	29704	6765375	6770252	0	5436	37649	M
NorthernBobwhite_ScaffoldedDeNovo_contig_24820	gi|358485511|ref|NC_006088.3 | GGA1	83.3	3329	360	40	1556	4724	6776657	6779949	0	3494	4	S
NorthernBobwhite_ScaffoldedDeNovo_contig_8301	gi|358485511|ref|NC_006088.3 | GGA1	87.66	4993	421	38	17956	22814	6790689	6785758	0	6231	32511	M
NorthernBobwhite_ScaffoldedDeNovo_contig_137384	gi|358485511|ref|NC_006088.3 | GGA1	90.84	273	23	2	345	616	6807979	6807708	4e-101	372	8920	M
NorthernBobwhite_ScaffoldedDeNovo_contig_1	gi|358485511|ref|NC_006088.3 | GGA1	89.04	3176	302	17	4789	7941	6815316	6812164	0	4123	5727	M
NorthernBobwhite_ScaffoldedDeNovo_contig_138805	gi|358485511|ref|NC_006088.3 | GGA1	89.8	196	18	1	2	195	6819982	6819787	1e-67	260	2	S
NorthernBobwhite_ScaffoldedDeNovo_contig_154556	gi|358485511|ref|NC_006088.3 | GGA1	84.62	650	78	6	2	649	6820060	6820689	0	715	1	S
NorthernBobwhite_ScaffoldedDeNovo_contig_189470	gi|358485511|ref|NC_006088.3 | GGA1	92.72	302	21	1	1	301	6821226	6820925	1e-122	443	1	S
NorthernBobwhite_ScaffoldedDeNovo_contig_150336	gi|358485511|ref|NC_006088.3 | GGA1	86.47	207	23	1	621	822	6821684	6821890	1e-63	248	3	S
NorthernBobwhite_ScaffoldedDeNovo_contig_87936	gi|358485511|ref|NC_006088.3 | GGA1	93.12	349	23	1	5385	5732	6822939	6822591	4e-144	518	2	S
NorthernBobwhite_ScaffoldedDeNovo_contig_91525	gi|358485511|ref|NC_006088.3 | GGA1	87.01	354	41	3	2	355	6823262	6823610	1e-116	423	1	S
NorthernBobwhite_ScaffoldedDeNovo_contig_185253	gi|358485511|ref|NC_006088.3 | GGA1	85.03	187	14	2	311	484	6824180	6824365	8e-54	215	3	S
NorthernBobwhite_ScaffoldedDeNovo_contig_74243	gi|358485511|ref|NC_006088.3 | GGA1	97.62	463	11	0	1	463	6825063	6824601	0	785	1	S
NorthernBobwhite_ScaffoldedDeNovo_contig_102688	gi|358485511|ref|NC_006088.3 | GGA1	86.7	188	19	2	1	188	6826071	6825890	5e-56	223	3	S
NorthernBobwhite_ScaffoldedDeNovo_contig_84774	gi|358485511|ref|NC_006088.3 | GGA1	82.82	291	28	4	2	291	6828177	6828446	3e-80	302	1	S
NorthernBobwhite_ScaffoldedDeNovo_contig_52219	gi|358485511|ref|NC_006088.3 | GGA1	90.79	304	27	1	1	303	6828855	6828552	3e-114	419	3	S
NorthernBobwhite_ScaffoldedDeNovo_contig_58621	gi|358485511|ref|NC_006088.3 | GGA1	86.73	505	53	2	1	494	6829785	6830286	2e-173	612	1	S
NorthernBobwhite_ScaffoldedDeNovo_contig_148819	gi|358485511|ref|NC_006088.3 | GGA1	95	580	28	1	1	579	6831144	6830565	0	911	1	S
NorthernBobwhite_ScaffoldedDeNovo_contig_181680	gi|358485511|ref|NC_006088.3 | GGA1	90.12	253	25	0	1	253	6833641	6833893	2e-92	343	2	S
NorthernBobwhite_ScaffoldedDeNovo_contig_79620	gi|358485511|ref|NC_006088.3 | GGA1	97.4	154	4	0	5246	5399	6834827	6834980	2e-66	260	2	S
NorthernBobwhite_ScaffoldedDeNovo_contig_48415	gi|358485511|ref|NC_006088.3 | GGA1	82.99	529	89	1	8	536	6837854	6838381	2e-153	545	1	S
NorthernBobwhite_ScaffoldedDeNovo_contig_1819	gi|358485511|ref|NC_006088.3 | GGA1	84.95	9950	1051	71	87475	97114	6865014	6855201	0	11290	133570	M
NorthernBobwhite_ScaffoldedDeNovo_contig_167286	gi|358485511|ref|NC_006088.3 | GGA1	82.66	323	49	2	1	323	6874293	6874608	7e-88	327	1	S
NorthernBobwhite_ScaffoldedDeNovo_contig_198925	gi|358485511|ref|NC_006088.3 | GGA1	82.61	322	49	2	1	322	6874294	6874608	2e-87	325	1	S
NorthernBobwhite_ScaffoldedDeNovo_contig_94727	gi|358485511|ref|NC_006088.3 | GGA1	87.32	1696	149	11	1	1635	6874318	6872628	0	2100	2	M
NorthernBobwhite_ScaffoldedDeNovo_contig_211791	gi|358485511|ref|NC_006088.3 | GGA1	85.71	35	5	0	121	155	6888497	6888463	0.14	41	17	M
NorthernBobwhite_ScaffoldedDeNovo_contig_22410	gi|358485511|ref|NC_006088.3 | GGA1	85.73	995	95	9	32	1016	6899111	6900068	0	1157	1	S
NorthernBobwhite_ScaffoldedDeNovo_contig_85215	gi|358485511|ref|NC_006088.3 | GGA1	87.41	397	34	3	1	381	6900132	6900528	3e-137	491	1	S
NorthernBobwhite_ScaffoldedDeNovo_contig_184078	gi|358485511|ref|NC_006088.3 | GGA1	83.69	331	46	2	1	324	6907485	6907156	2e-95	352	1	S
NorthernBobwhite_ScaffoldedDeNovo_contig_193022	gi|358485511|ref|NC_006088.3 | GGA1	83.69	331	46	2	1	324	6907485	6907156	2e-95	352	1	S
NorthernBobwhite_ScaffoldedDeNovo_contig_19593	gi|358485511|ref|NC_006088.3 | GGA1	81.32	273	34	3	1	256	6917465	6917737	1e-68	264	8716	M
NorthernBobwhite_ScaffoldedDeNovo_contig_127326	gi|358485511|ref|NC_006088.3 | GGA1	82.98	141	16	2	18	150	6917466	6917606	6e-33	145	994	M
NorthernBobwhite_ScaffoldedDeNovo_contig_176088	gi|358485511|ref|NC_006088.3 | GGA1	79.78	267	37	7	490	743	6917496	6917758	5e-56	223	3385	M
NorthernBobwhite_ScaffoldedDeNovo_contig_97006	gi|358485511|ref|NC_006088.3 | GGA1	79.43	457	68	5	1	439	6946068	6946516	5e-110	401	1	S
NorthernBobwhite_ScaffoldedDeNovo_contig_65175	gi|358485511|ref|NC_006088.3 | GGA1	87.57	732	84	2	4	734	6946494	6947219	0	908	1	S
NorthernBobwhite_ScaffoldedDeNovo_contig_99638	gi|358485511|ref|NC_006088.3 | GGA1	79.3	459	67	5	1	441	6946516	6946068	2e-110	403	1	S
NorthernBobwhite_ScaffoldedDeNovo_contig_205595	gi|358485511|ref|NC_006088.3 | GGA1	82.98	423	50	5	4	409	6947197	6947614	2e-120	435	1	S
NorthernBobwhite_ScaffoldedDeNovo_contig_187644	gi|358485511|ref|NC_006088.3 | GGA1	82.31	424	50	5	1	405	6947614	6947197	1e-117	426	1	S
NorthernBobwhite_ScaffoldedDeNovo_contig_18400	gi|358485511|ref|NC_006088.3 | GGA1	85.18	8909	932	78	49305	58030	6974139	6965436	0	10110	63592	M
NorthernBobwhite_ScaffoldedDeNovo_contig_111950	gi|358485511|ref|NC_006088.3 | GGA1	86.66	2616	241	19	1	2561	6975728	6978290	0	3157	2	M
NorthernBobwhite_ScaffoldedDeNovo_contig_172410	gi|358485511|ref|NC_006088.3 | GGA1	84.36	390	55	3	34	418	6983690	6983302	5e-116	421	1	S
NorthernBobwhite_ScaffoldedDeNovo_contig_187595	gi|358485511|ref|NC_006088.3 | GGA1	89.32	487	46	3	1	487	6993357	6993837	2e-180	636	1	S
NorthernBobwhite_ScaffoldedDeNovo_contig_126000	gi|358485511|ref|NC_006088.3 | GGA1	91.34	277	19	3	111	387	6993627	6993356	1e-104	383	2	S
NorthernBobwhite_ScaffoldedDeNovo_contig_216525	gi|358485511|ref|NC_006088.3 | GGA1	77.04	318	60	7	1	310	6999131	6999443	6e-57	224	10518	M
NorthernBobwhite_ScaffoldedDeNovo_contig_207764	gi|358485511|ref|NC_006088.3 | GGA1	78.62	318	60	6	4	318	6999443	6999131	5e-64	248	12727	M
NorthernBobwhite_ScaffoldedDeNovo_contig_29644	gi|358485511|ref|NC_006088.3 | GGA1	88.59	938	72	7	1	914	7023463	7022537	0	1209	1	S
NorthernBobwhite_ScaffoldedDeNovo_contig_25756	gi|358485511|ref|NC_006088.3 | GGA1	85.56	6641	716	53	9723	16222	7033354	7039892	0	7647	21290	M
NorthernBobwhite_ScaffoldedDeNovo_contig_90375	gi|358485511|ref|NC_006088.3 | GGA1	84.35	147	23	0	202	348	7035575	7035429	7e-38	161	601	M
NorthernBobwhite_ScaffoldedDeNovo_contig_87455	gi|358485511|ref|NC_006088.3 | GGA1	78.01	332	56	5	1	318	7046252	7046580	2e-68	262	1	S
NorthernBobwhite_ScaffoldedDeNovo_contig_87456	gi|358485511|ref|NC_006088.3 | GGA1	77.71	332	57	5	1	318	7046252	7046580	3e-67	259	1	S
NorthernBobwhite_ScaffoldedDeNovo_contig_81967	gi|358485511|ref|NC_006088.3 | GGA1	86.81	637	61	4	506	1129	7047451	7046825	0	773	7454	M
NorthernBobwhite_ScaffoldedDeNovo_contig_153656	gi|358485511|ref|NC_006088.3 | GGA1	82.74	168	23	2	386	553	7047706	7047867	8e-40	168	1	S
NorthernBobwhite_ScaffoldedDeNovo_contig_128590	gi|358485511|ref|NC_006088.3 | GGA1	90.59	340	30	2	1	339	7049518	7049856	1e-128	462	1	S
NorthernBobwhite_ScaffoldedDeNovo_contig_185452	gi|358485511|ref|NC_006088.3 | GGA1	90	340	32	2	1	339	7049518	7049856	7e-126	453	1	S
NorthernBobwhite_ScaffoldedDeNovo_contig_57216	gi|358485511|ref|NC_006088.3 | GGA1	88.24	34	4	0	11	44	7053604	7053637	0.057	44.6	29	M
NorthernBobwhite_ScaffoldedDeNovo_contig_213696	gi|358485511|ref|NC_006088.3 | GGA1	80.3	66	7	2	174	233	7055231	7055296	6e-06	57.2	18	M
NorthernBobwhite_ScaffoldedDeNovo_contig_217600	gi|358485511|ref|NC_006088.3 | GGA1	86	50	5	1	285	334	7055231	7055278	3e-06	57.2	833	M
NorthernBobwhite_ScaffoldedDeNovo_contig_26335	gi|358485511|ref|NC_006088.3 | GGA1	86.51	4232	460	26	2554	6725	7064840	7060660	0	5041	12166	M
NorthernBobwhite_ScaffoldedDeNovo_contig_12935	gi|358485511|ref|NC_006088.3 | GGA1	85.37	10232	1059	89	32780	42747	7094663	7084606	0	11700	100885	M
NorthernBobwhite_ScaffoldedDeNovo_contig_191165	gi|358485511|ref|NC_006088.3 | GGA1	81.45	523	73	11	956	1467	7095012	7095521	8e-133	479	1	S
NorthernBobwhite_ScaffoldedDeNovo_contig_183051	gi|358485511|ref|NC_006088.3 | GGA1	81.42	339	46	5	1	331	7095521	7095192	1e-85	320	1	S
NorthernBobwhite_ScaffoldedDeNovo_contig_44765	gi|358485511|ref|NC_006088.3 | GGA1	76.92	611	70	10	79	619	7096986	7096377	3e-135	486	1	S
NorthernBobwhite_ScaffoldedDeNovo_contig_4065	gi|358485511|ref|NC_006088.3 | GGA1	85.79	2829	286	24	1	2749	7127688	7130480	0	3287	19952	M
NorthernBobwhite_ScaffoldedDeNovo_contig_138465	gi|358485511|ref|NC_006088.3 | GGA1	80.12	337	58	4	3	331	7129567	7129902	1e-78	297	13706	M
NorthernBobwhite_ScaffoldedDeNovo_contig_213926	gi|358485511|ref|NC_006088.3 | GGA1	80.36	336	58	3	3	330	7129567	7129902	3e-80	302	14093	M
NorthernBobwhite_ScaffoldedDeNovo_contig_184395	gi|358485511|ref|NC_006088.3 | GGA1	87.7	122	12	1	391	512	7132197	7132315	2e-34	150	2	S
NorthernBobwhite_ScaffoldedDeNovo_contig_12514	gi|358485511|ref|NC_006088.3 | GGA1	87.61	1461	140	8	8212	9633	7134781	7133323	0	1820	7	S
NorthernBobwhite_ScaffoldedDeNovo_contig_123826	gi|358485511|ref|NC_006088.3 | GGA1	80.77	286	53	2	104	388	7141512	7141228	5e-72	275	3624	M
NorthernBobwhite_ScaffoldedDeNovo_contig_151614	gi|358485511|ref|NC_006088.3 | GGA1	85.32	293	41	2	96	387	7141520	7141229	8e-88	327	8215	M
NorthernBobwhite_ScaffoldedDeNovo_contig_108694	gi|358485511|ref|NC_006088.3 | GGA1	86.35	249	28	2	1	249	7145663	7145421	3e-76	293	2	S
NorthernBobwhite_ScaffoldedDeNovo_contig_12513	gi|358485511|ref|NC_006088.3 | GGA1	87.65	1142	117	9	2287	3409	7146740	7147876	0	1406	4	S
NorthernBobwhite_ScaffoldedDeNovo_contig_117400	gi|358485511|ref|NC_006088.3 | GGA1	80.72	747	113	7	97	815	7148263	7149006	0	695	10718	M
NorthernBobwhite_ScaffoldedDeNovo_contig_117401	gi|358485511|ref|NC_006088.3 | GGA1	81.26	747	109	8	105	823	7148263	7149006	0	708	12021	M
NorthernBobwhite_ScaffoldedDeNovo_contig_90767	gi|358485511|ref|NC_006088.3 | GGA1	74.74	764	102	13	1	716	7148279	7148999	1e-148	531	10277	M
NorthernBobwhite_ScaffoldedDeNovo_contig_49830	gi|358485511|ref|NC_006088.3 | GGA1	75.89	593	97	10	1	551	7148297	7148885	1e-123	448	4282	M
NorthernBobwhite_ScaffoldedDeNovo_contig_135530	gi|358485511|ref|NC_006088.3 | GGA1	79.93	573	97	8	2	570	7148308	7148866	2e-141	506	10138	M
NorthernBobwhite_ScaffoldedDeNovo_contig_67369	gi|358485511|ref|NC_006088.3 | GGA1	77.98	486	84	7	1	472	7148327	7148803	3e-113	412	2536	M
NorthernBobwhite_ScaffoldedDeNovo_contig_75348	gi|358485511|ref|NC_006088.3 | GGA1	78.5	642	106	7	1	638	7148396	7149009	2e-151	540	15626	M
NorthernBobwhite_ScaffoldedDeNovo_contig_157058	gi|358485511|ref|NC_006088.3 | GGA1	69.74	466	70	7	12	416	7148399	7148854	2e-64	250	1383	M
NorthernBobwhite_ScaffoldedDeNovo_contig_155787	gi|358485511|ref|NC_006088.3 | GGA1	73.2	250	45	6	65	305	7148426	7148190	1e-31	141	163	M
NorthernBobwhite_ScaffoldedDeNovo_contig_55560	gi|358485511|ref|NC_006088.3 | GGA1	71.19	354	88	3	1	340	7148500	7148853	1e-54	217	978	M
NorthernBobwhite_ScaffoldedDeNovo_contig_35996	gi|358485511|ref|NC_006088.3 | GGA1	78.4	375	79	2	1	374	7148503	7148876	2e-89	333	5337	M
NorthernBobwhite_ScaffoldedDeNovo_contig_114652	gi|358485511|ref|NC_006088.3 | GGA1	81.54	390	63	4	1	381	7148505	7148894	4e-100	369	8290	M
NorthernBobwhite_ScaffoldedDeNovo_contig_124291	gi|358485511|ref|NC_006088.3 | GGA1	82.03	512	76	2	295	790	7148505	7149016	6e-144	515	6899	M
NorthernBobwhite_ScaffoldedDeNovo_contig_101253	gi|358485511|ref|NC_006088.3 | GGA1	78.3	447	91	2	2	442	7148534	7148980	1e-105	387	3376	M
NorthernBobwhite_ScaffoldedDeNovo_contig_135007	gi|358485511|ref|NC_006088.3 | GGA1	77.71	462	96	3	57	511	7148555	7149016	4e-109	399	2865	M
NorthernBobwhite_ScaffoldedDeNovo_contig_188538	gi|358485511|ref|NC_006088.3 | GGA1	78.9	417	73	4	3	404	7148555	7148971	2e-103	379	6655	M
NorthernBobwhite_ScaffoldedDeNovo_contig_77509	gi|358485511|ref|NC_006088.3 | GGA1	81.03	564	103	3	5	567	7148592	7149152	1e-150	536	8924	M
NorthernBobwhite_ScaffoldedDeNovo_contig_43499	gi|358485511|ref|NC_006088.3 | GGA1	79.11	474	67	7	3	448	7148627	7149096	2e-111	407	3779	M
NorthernBobwhite_ScaffoldedDeNovo_contig_33319	gi|358485511|ref|NC_006088.3 | GGA1	81.29	497	79	6	2	484	7148630	7149126	1e-131	473	4469	M
NorthernBobwhite_ScaffoldedDeNovo_contig_125942	gi|358485511|ref|NC_006088.3 | GGA1	81.82	506	89	2	2	504	7148648	7149153	5e-143	511	9964	M
NorthernBobwhite_ScaffoldedDeNovo_contig_127469	gi|358485511|ref|NC_006088.3 | GGA1	79.42	345	62	2	2	337	7148662	7149006	3e-86	322	2416	M
NorthernBobwhite_ScaffoldedDeNovo_contig_126376	gi|358485511|ref|NC_006088.3 | GGA1	79.88	338	67	1	1	337	7148666	7149003	8e-88	327	2062	M
NorthernBobwhite_ScaffoldedDeNovo_contig_63044	gi|358485511|ref|NC_006088.3 | GGA1	85.19	324	47	1	1	323	7148673	7148996	2e-101	372	8057	M
NorthernBobwhite_ScaffoldedDeNovo_contig_41522	gi|358485511|ref|NC_006088.3 | GGA1	74.39	410	94	2	1	399	7148680	7149089	4e-80	302	3291	M
NorthernBobwhite_ScaffoldedDeNovo_contig_137268	gi|358485511|ref|NC_006088.3 | GGA1	85.42	343	40	5	1	333	7148686	7149028	1e-103	379	9566	M
NorthernBobwhite_ScaffoldedDeNovo_contig_40682	gi|358485511|ref|NC_006088.3 | GGA1	83.5	406	64	2	1	403	7148690	7149095	3e-119	432	10028	M
NorthernBobwhite_ScaffoldedDeNovo_contig_160865	gi|358485511|ref|NC_006088.3 | GGA1	81.29	417	43	5	26	415	7148734	7148326	1e-112	410	2658	M
NorthernBobwhite_ScaffoldedDeNovo_contig_44996	gi|358485511|ref|NC_006088.3 | GGA1	80.85	449	66	7	1	441	7148831	7148395	2e-114	416	6342	M
NorthernBobwhite_ScaffoldedDeNovo_contig_75321	gi|358485511|ref|NC_006088.3 | GGA1	80.86	209	38	2	1	207	7148847	7149055	2e-46	190	803	M
NorthernBobwhite_ScaffoldedDeNovo_contig_4514	gi|358485511|ref|NC_006088.3 | GGA1	75.61	533	115	6	207	729	7148859	7148332	8e-98	361	2770	M
NorthernBobwhite_ScaffoldedDeNovo_contig_174102	gi|358485511|ref|NC_006088.3 | GGA1	87.17	187	24	0	9	195	7148903	7149089	1e-58	230	1296	M
NorthernBobwhite_ScaffoldedDeNovo_contig_61147	gi|358485511|ref|NC_006088.3 | GGA1	77.82	523	93	5	1	508	7148941	7148427	6e-123	444	4870	M
NorthernBobwhite_ScaffoldedDeNovo_contig_44519	gi|358485511|ref|NC_006088.3 | GGA1	82.42	421	71	2	1	418	7148961	7148541	1e-117	426	12389	M
NorthernBobwhite_ScaffoldedDeNovo_contig_39648	gi|358485511|ref|NC_006088.3 | GGA1	81.58	673	112	4	1	671	7148966	7148304	0	654	14150	M
NorthernBobwhite_ScaffoldedDeNovo_contig_129821	gi|358485511|ref|NC_006088.3 | GGA1	86.55	357	45	3	1	354	7148975	7148619	6e-115	417	12016	M
NorthernBobwhite_ScaffoldedDeNovo_contig_78205	gi|358485511|ref|NC_006088.3 | GGA1	82.26	451	68	4	1	439	7148976	7148526	2e-123	446	9583	M
NorthernBobwhite_ScaffoldedDeNovo_contig_41602	gi|358485511|ref|NC_006088.3 | GGA1	83.56	724	101	9	473	1191	7148993	7148283	0	746	16303	M
NorthernBobwhite_ScaffoldedDeNovo_contig_72980	gi|358485511|ref|NC_006088.3 | GGA1	79.08	674	106	8	1	650	7148993	7148331	2e-162	576	9571	M
NorthernBobwhite_ScaffoldedDeNovo_contig_102473	gi|358485511|ref|NC_006088.3 | GGA1	80.46	742	129	5	1	736	7148994	7148263	0	682	10697	M
NorthernBobwhite_ScaffoldedDeNovo_contig_115992	gi|358485511|ref|NC_006088.3 | GGA1	82.85	484	77	4	1	481	7148997	7148517	2e-135	486	11321	M
NorthernBobwhite_ScaffoldedDeNovo_contig_41601	gi|358485511|ref|NC_006088.3 | GGA1	77.03	653	119	7	1	629	7149002	7148357	6e-143	511	8466	M
NorthernBobwhite_ScaffoldedDeNovo_contig_68780	gi|358485511|ref|NC_006088.3 | GGA1	76.08	510	104	6	1	493	7149003	7148495	2e-104	383	2025	M
NorthernBobwhite_ScaffoldedDeNovo_contig_73146	gi|358485511|ref|NC_006088.3 | GGA1	84.16	524	80	3	5	526	7149016	7148494	2e-161	572	16125	M
NorthernBobwhite_ScaffoldedDeNovo_contig_55545	gi|358485511|ref|NC_006088.3 | GGA1	78.45	724	121	9	1	697	7149026	7148311	5e-171	605	11867	M
NorthernBobwhite_ScaffoldedDeNovo_contig_45443	gi|358485511|ref|NC_006088.3 | GGA1	77.91	688	101	9	1	657	7149036	7148369	4e-158	562	10709	M
NorthernBobwhite_ScaffoldedDeNovo_contig_200550	gi|358485511|ref|NC_006088.3 | GGA1	79.8	495	76	6	1	472	7149037	7148544	5e-123	444	9050	M
NorthernBobwhite_ScaffoldedDeNovo_contig_72607	gi|358485511|ref|NC_006088.3 | GGA1	84.59	519	77	3	1	516	7149074	7148556	4e-163	578	14792	M
NorthernBobwhite_ScaffoldedDeNovo_contig_81013	gi|358485511|ref|NC_006088.3 | GGA1	80.38	469	82	4	1	459	7149075	7148607	3e-119	432	4644	M
NorthernBobwhite_ScaffoldedDeNovo_contig_67633	gi|358485511|ref|NC_006088.3 | GGA1	87.3	307	37	2	19	324	7149084	7148779	7e-101	370	2525	M
NorthernBobwhite_ScaffoldedDeNovo_contig_107706	gi|358485511|ref|NC_006088.3 | GGA1	80.73	602	105	3	250	849	7149089	7148497	4e-159	565	8268	M
NorthernBobwhite_ScaffoldedDeNovo_contig_30354	gi|358485511|ref|NC_006088.3 | GGA1	80.44	772	130	10	292	1052	7149089	7148328	0	720	11464	M
NorthernBobwhite_ScaffoldedDeNovo_contig_93964	gi|358485511|ref|NC_006088.3 | GGA1	85.1	349	52	0	1	349	7149091	7148743	2e-108	396	5293	M
NorthernBobwhite_ScaffoldedDeNovo_contig_191455	gi|358485511|ref|NC_006088.3 | GGA1	86.26	131	18	0	203	333	7149092	7148962	3e-36	156	209	M
NorthernBobwhite_ScaffoldedDeNovo_contig_41271	gi|358485511|ref|NC_006088.3 | GGA1	79.34	634	92	5	1	602	7149095	7148469	3e-158	565	4195	M
NorthernBobwhite_ScaffoldedDeNovo_contig_54030	gi|358485511|ref|NC_006088.3 | GGA1	73.86	876	106	15	8	779	7149095	7148239	2e-166	590	17161	M
NorthernBobwhite_ScaffoldedDeNovo_contig_95626	gi|358485511|ref|NC_006088.3 | GGA1	78.9	635	120	4	179	803	7149104	7148474	1e-158	563	4619	M
NorthernBobwhite_ScaffoldedDeNovo_contig_76826	gi|358485511|ref|NC_006088.3 | GGA1	85.31	354	45	1	20	366	7149116	7148763	1e-111	407	3012	M
NorthernBobwhite_ScaffoldedDeNovo_contig_102414	gi|358485511|ref|NC_006088.3 | GGA1	88.65	185	20	1	191	374	7149119	7148935	4e-60	235	1270	M
NorthernBobwhite_ScaffoldedDeNovo_contig_100571	gi|358485511|ref|NC_006088.3 | GGA1	83.08	863	129	9	16	865	7149127	7148269	0	874	11965	M
NorthernBobwhite_ScaffoldedDeNovo_contig_154246	gi|358485511|ref|NC_006088.3 | GGA1	80.21	384	71	2	1	379	7149127	7148744	6e-96	354	1700	M
NorthernBobwhite_ScaffoldedDeNovo_contig_91783	gi|358485511|ref|NC_006088.3 | GGA1	82.59	379	55	3	68	436	7149133	7148756	1e-104	383	5158	M
NorthernBobwhite_ScaffoldedDeNovo_contig_136582	gi|358485511|ref|NC_006088.3 | GGA1	83.46	538	75	5	1	527	7149150	7148616	8e-160	567	12319	M
NorthernBobwhite_ScaffoldedDeNovo_contig_75902	gi|358485511|ref|NC_006088.3 | GGA1	86.28	328	43	2	73	398	7149156	7149483	1e-103	381	1355	M
NorthernBobwhite_ScaffoldedDeNovo_contig_12576	gi|358485511|ref|NC_006088.3 | GGA1	87.73	277	32	1	1	275	7149244	7149520	2e-92	343	1849	M
NorthernBobwhite_ScaffoldedDeNovo_contig_91693	gi|358485511|ref|NC_006088.3 | GGA1	86.25	269	36	1	292	560	7149493	7149226	8e-84	315	1309	M
NorthernBobwhite_ScaffoldedDeNovo_contig_42662	gi|358485511|ref|NC_006088.3 | GGA1	85.56	540	57	9	12	539	7151798	7152328	4e-170	601	1	S
NorthernBobwhite_ScaffoldedDeNovo_contig_82896	gi|358485511|ref|NC_006088.3 | GGA1	93.33	30	2	0	2357	2386	7187106	7187135	0.029	46.4	14	M
NorthernBobwhite_ScaffoldedDeNovo_contig_18197	gi|358485511|ref|NC_006088.3 | GGA1	82.89	10322	1207	103	24672	34632	7189745	7179622	0	10690	52853	M
NorthernBobwhite_ScaffoldedDeNovo_contig_79255	gi|358485511|ref|NC_006088.3 | GGA1	85.37	41	4	1	158	198	7204415	7204453	0.02	44.6	19	M
NorthernBobwhite_ScaffoldedDeNovo_contig_99871	gi|358485511|ref|NC_006088.3 | GGA1	78.57	56	8	2	175	228	7205462	7205515	0.087	42.8	13	M
NorthernBobwhite_ScaffoldedDeNovo_contig_93749	gi|358485511|ref|NC_006088.3 | GGA1	88.57	35	4	0	131	165	7221299	7221265	0.013	46.4	22	M
NorthernBobwhite_ScaffoldedDeNovo_contig_5724	gi|358485511|ref|NC_006088.3 | GGA1	81.98	5939	687	79	25220	30855	7226780	7220922	0	5876	90255	M
NorthernBobwhite_ScaffoldedDeNovo_contig_147225	gi|358485511|ref|NC_006088.3 | GGA1	100	23	0	0	305	327	7230440	7230418	0.059	42.8	75	M
NorthernBobwhite_ScaffoldedDeNovo_contig_118126	gi|358485511|ref|NC_006088.3 | GGA1	78.9	109	20	2	190	295	7243759	7243867	1e-15	87.8	2260	M
NorthernBobwhite_ScaffoldedDeNovo_contig_155081	gi|358485511|ref|NC_006088.3 | GGA1	78.9	109	20	2	13	118	7243867	7243759	1e-15	87.8	2259	M
NorthernBobwhite_ScaffoldedDeNovo_contig_104343	gi|358485511|ref|NC_006088.3 | GGA1	81.44	625	115	1	1	624	7245957	7246581	4e-170	601	14804	M
NorthernBobwhite_ScaffoldedDeNovo_contig_63545	gi|358485511|ref|NC_006088.3 | GGA1	84.5	613	84	4	1	603	7246001	7246612	0	670	18698	M
NorthernBobwhite_ScaffoldedDeNovo_contig_67749	gi|358485511|ref|NC_006088.3 | GGA1	81.15	382	64	2	1	376	7246174	7246553	1e-98	363	10960	M
NorthernBobwhite_ScaffoldedDeNovo_contig_99158	gi|358485511|ref|NC_006088.3 | GGA1	85.26	312	43	3	5	313	7246299	7245988	3e-93	345	9426	M
NorthernBobwhite_ScaffoldedDeNovo_contig_27399	gi|358485511|ref|NC_006088.3 | GGA1	83.39	295	45	2	1	293	7246319	7246027	4e-81	306	8020	M
NorthernBobwhite_ScaffoldedDeNovo_contig_123642	gi|358485511|ref|NC_006088.3 | GGA1	79.49	390	53	3	3	365	7246346	7245957	6e-96	354	4508	M
NorthernBobwhite_ScaffoldedDeNovo_contig_214029	gi|358485511|ref|NC_006088.3 | GGA1	84.16	303	47	1	6	307	7246346	7246044	7e-88	327	8117	M
NorthernBobwhite_ScaffoldedDeNovo_contig_189252	gi|358485511|ref|NC_006088.3 | GGA1	82.03	306	45	3	15	311	7246411	7246107	2e-81	306	5472	M
NorthernBobwhite_ScaffoldedDeNovo_contig_71592	gi|358485511|ref|NC_006088.3 | GGA1	79.57	235	33	3	22	241	7246516	7246282	8e-52	208	2599	M
NorthernBobwhite_ScaffoldedDeNovo_contig_51729	gi|358485511|ref|NC_006088.3 | GGA1	80.58	381	66	2	1	375	7246553	7246175	2e-95	352	9041	M
NorthernBobwhite_ScaffoldedDeNovo_contig_136643	gi|358485511|ref|NC_006088.3 | GGA1	79.77	613	98	9	36	628	7246603	7245997	2e-148	529	11023	M
NorthernBobwhite_ScaffoldedDeNovo_contig_43741	gi|358485511|ref|NC_006088.3 | GGA1	78.8	618	89	8	3979	4556	7246612	7245997	3e-146	526	13764	M
NorthernBobwhite_ScaffoldedDeNovo_contig_193830	gi|358485511|ref|NC_006088.3 | GGA1	82.5	160	20	3	40	191	7264821	7264980	4e-36	156	1429	M
NorthernBobwhite_ScaffoldedDeNovo_contig_31885	gi|358485511|ref|NC_006088.3 | GGA1	84.8	5487	554	55	79317	84596	7298378	7292965	0	6139	67945	M
NorthernBobwhite_ScaffoldedDeNovo_contig_158720	gi|358485511|ref|NC_006088.3 | GGA1	80.49	364	64	3	239	600	7341899	7342257	4e-88	329	1	S
NorthernBobwhite_ScaffoldedDeNovo_contig_43552	gi|358485511|ref|NC_006088.3 | GGA1	77.3	2088	320	28	618	2584	7345232	7343178	0	1642	53	M
NorthernBobwhite_ScaffoldedDeNovo_contig_56664	gi|358485511|ref|NC_006088.3 | GGA1	79.04	334	51	3	1	322	7354844	7354518	6e-77	291	1	S
NorthernBobwhite_ScaffoldedDeNovo_contig_196404	gi|358485511|ref|NC_006088.3 | GGA1	90	30	3	0	318	347	7386303	7386274	0.23	41	28	M
NorthernBobwhite_ScaffoldedDeNovo_contig_101526	gi|358485511|ref|NC_006088.3 | GGA1	90.62	32	1	1	144	175	7390328	7390299	0.048	42.8	37	M
NorthernBobwhite_ScaffoldedDeNovo_contig_38792	gi|358485511|ref|NC_006088.3 | GGA1	79.18	711	83	11	11	665	7401650	7402351	4e-177	625	2	M
NorthernBobwhite_ScaffoldedDeNovo_contig_99690	gi|358485511|ref|NC_006088.3 | GGA1	82.49	691	100	14	1	677	7402979	7402296	0	657	23511	M
NorthernBobwhite_ScaffoldedDeNovo_contig_98306	gi|358485511|ref|NC_006088.3 | GGA1	83.71	896	110	8	12	885	7449025	7449906	0	955	1	S
NorthernBobwhite_ScaffoldedDeNovo_contig_219839	gi|358485511|ref|NC_006088.3 | GGA1	80.33	61	12	0	75	135	7450120	7450180	2e-06	57.2	65	M
NorthernBobwhite_ScaffoldedDeNovo_contig_154596	gi|358485511|ref|NC_006088.3 | GGA1	92.31	39	3	0	357	395	7450155	7450117	2e-06	57.2	232	M
NorthernBobwhite_ScaffoldedDeNovo_contig_61491	gi|358485511|ref|NC_006088.3 | GGA1	82.14	56	10	0	1539	1594	7450175	7450120	1e-05	57.2	835	M
NorthernBobwhite_ScaffoldedDeNovo_contig_218228	gi|358485511|ref|NC_006088.3 | GGA1	74.36	78	9	3	1	78	7450180	7450114	0.001	48.2	230	M
NorthernBobwhite_ScaffoldedDeNovo_contig_137411	gi|358485511|ref|NC_006088.3 | GGA1	77.46	71	7	3	3692	3760	7450184	7450121	0.001	51.8	89	M
NorthernBobwhite_ScaffoldedDeNovo_contig_102617	gi|358485511|ref|NC_006088.3 | GGA1	100	27	0	0	2428	2454	7500399	7500373	0.002	50	114	M
NorthernBobwhite_ScaffoldedDeNovo_contig_119724	gi|358485511|ref|NC_006088.3 | GGA1	81.08	74	13	1	301	373	7534334	7534261	1e-09	68	32	M
NorthernBobwhite_ScaffoldedDeNovo_contig_45	gi|358485511|ref|NC_006088.3 | GGA1	85.68	25637	2793	214	312159	337191	7557467	7532106	0	29510	551538	M
NorthernBobwhite_ScaffoldedDeNovo_contig_128148	gi|358485511|ref|NC_006088.3 | GGA1	88.46	52	6	0	1	52	7580623	7580572	1e-09	68	5184	M
NorthernBobwhite_ScaffoldedDeNovo_contig_206824	gi|358485511|ref|NC_006088.3 | GGA1	87.1	31	1	1	188	215	7616544	7616514	2.3	37.4	13	M
NorthernBobwhite_ScaffoldedDeNovo_contig_190107	gi|358485511|ref|NC_006088.3 | GGA1	92	25	2	0	38	62	7630422	7630446	2	37.4	12	M
NorthernBobwhite_ScaffoldedDeNovo_contig_46994	gi|358485511|ref|NC_006088.3 | GGA1	67	303	71	11	495	792	7655131	7655409	9e-10	73.4	172	M
NorthernBobwhite_ScaffoldedDeNovo_contig_44984	gi|358485511|ref|NC_006088.3 | GGA1	71.2	184	41	5	1040	1222	7655175	7655003	4e-12	82.4	281	M
NorthernBobwhite_ScaffoldedDeNovo_contig_172633	gi|358485511|ref|NC_006088.3 | GGA1	68.79	141	40	2	6	146	7693356	7693492	0.0001	51.8	95	M
NorthernBobwhite_ScaffoldedDeNovo_contig_64093	gi|358485511|ref|NC_006088.3 | GGA1	88.57	35	3	1	19	52	7815612	7815578	0.051	42.8	48	M
NorthernBobwhite_ScaffoldedDeNovo_contig_194887	gi|358485511|ref|NC_006088.3 | GGA1	68.81	420	105	7	37	441	7866601	7866193	3e-37	159	44	M
NorthernBobwhite_ScaffoldedDeNovo_contig_177547	gi|358485511|ref|NC_006088.3 | GGA1	93.55	31	2	0	4	34	7871414	7871384	0.001	48.2	114	M
NorthernBobwhite_ScaffoldedDeNovo_contig_3947	gi|358485511|ref|NC_006088.3 | GGA1	79.7	5906	763	92	7122	12819	7879488	7873811	0	5223	5	M
NorthernBobwhite_ScaffoldedDeNovo_contig_184237	gi|358485511|ref|NC_006088.3 | GGA1	77.76	562	88	5	9	534	7905935	7906495	1e-127	461	2	S
NorthernBobwhite_ScaffoldedDeNovo_contig_11737	gi|358485511|ref|NC_006088.3 | GGA1	83.34	4777	572	48	69613	74262	7911332	7906653	0	5012	77532	M
NorthernBobwhite_ScaffoldedDeNovo_contig_215448	gi|358485511|ref|NC_006088.3 | GGA1	94.29	35	2	0	291	325	7928988	7928954	1e-05	55.4	31	M
NorthernBobwhite_ScaffoldedDeNovo_contig_217423	gi|358485511|ref|NC_006088.3 | GGA1	100	22	0	0	36	57	7929309	7929288	0.17	41	63	M
NorthernBobwhite_ScaffoldedDeNovo_contig_177069	gi|358485511|ref|NC_006088.3 | GGA1	86.11	36	5	0	325	360	7979940	7979975	0.079	42.8	13	M
NorthernBobwhite_ScaffoldedDeNovo_contig_113197	gi|358485511|ref|NC_006088.3 | GGA1	79.17	312	33	6	1	308	7993554	7993837	6e-71	271	1	S
NorthernBobwhite_ScaffoldedDeNovo_contig_39225	gi|358485511|ref|NC_006088.3 | GGA1	84.48	812	100	7	1	794	7993579	7992776	0	888	1	S
NorthernBobwhite_ScaffoldedDeNovo_contig_207676	gi|358485511|ref|NC_006088.3 | GGA1	94.54	531	28	1	9	539	7994235	7994764	0	823	1	S
NorthernBobwhite_ScaffoldedDeNovo_contig_39131	gi|358485511|ref|NC_006088.3 | GGA1	86.59	425	46	1	1	425	7995635	7996048	3e-144	515	1	S
NorthernBobwhite_ScaffoldedDeNovo_contig_112566	gi|358485511|ref|NC_006088.3 | GGA1	85.89	326	39	2	4	328	8010947	8010628	4e-103	378	2697	M
NorthernBobwhite_ScaffoldedDeNovo_contig_135409	gi|358485511|ref|NC_006088.3 | GGA1	75.23	327	52	6	302	627	8025447	8025149	2e-56	224	2	S
NorthernBobwhite_ScaffoldedDeNovo_contig_187665	gi|358485511|ref|NC_006088.3 | GGA1	81.48	54	9	1	378	430	8041300	8041247	0.0004	50	71	M
NorthernBobwhite_ScaffoldedDeNovo_contig_142313	gi|358485511|ref|NC_006088.3 | GGA1	83.84	563	68	5	42	586	8043042	8042485	1e-170	603	1	S
NorthernBobwhite_ScaffoldedDeNovo_contig_89425	gi|358485511|ref|NC_006088.3 | GGA1	90.67	150	14	0	161	310	8129097	8129246	4e-52	208	7578	M
NorthernBobwhite_ScaffoldedDeNovo_contig_165368	gi|358485511|ref|NC_006088.3 | GGA1	94.87	78	4	0	246	323	8129167	8129090	3e-26	123	130	M
NorthernBobwhite_ScaffoldedDeNovo_contig_149269	gi|358485511|ref|NC_006088.3 | GGA1	85.82	134	19	0	128	261	8129229	8129096	3e-36	156	3757	M
NorthernBobwhite_ScaffoldedDeNovo_contig_80536	gi|358485511|ref|NC_006088.3 | GGA1	89.54	153	16	0	1	153	8129249	8129097	5e-51	205	7151	M
NorthernBobwhite_ScaffoldedDeNovo_contig_12316	gi|358485511|ref|NC_006088.3 | GGA1	81.9	11903	1368	146	125515	136868	8129256	8140920	0	11800	219617	M
NorthernBobwhite_ScaffoldedDeNovo_contig_182446	gi|358485511|ref|NC_006088.3 | GGA1	82.69	52	9	0	1438	1489	8144561	8144612	0.0002	53.6	22	M
NorthernBobwhite_ScaffoldedDeNovo_contig_91454	gi|358485511|ref|NC_006088.3 | GGA1	92.7	493	31	3	2	493	8169956	8170444	0	719	1	S
NorthernBobwhite_ScaffoldedDeNovo_contig_125450	gi|358485511|ref|NC_006088.3 | GGA1	83.87	372	58	1	1	370	8170426	8170797	7e-109	398	1	S
NorthernBobwhite_ScaffoldedDeNovo_contig_217026	gi|358485511|ref|NC_006088.3 | GGA1	89.74	39	2	1	28	64	8214738	8214700	0.0003	50	16	M
NorthernBobwhite_ScaffoldedDeNovo_contig_47196	gi|358485511|ref|NC_006088.3 | GGA1	89.97	798	63	7	101	890	8224833	8224045	0	1063	1	S
NorthernBobwhite_ScaffoldedDeNovo_contig_6606	gi|358485511|ref|NC_006088.3 | GGA1	85.64	18676	1962	165	89818	108021	8248290	8266718	0	21500	130477	M
NorthernBobwhite_ScaffoldedDeNovo_contig_217051	gi|358485511|ref|NC_006088.3 | GGA1	100	23	0	0	3	25	8323509	8323487	0.048	42.8	58	M
NorthernBobwhite_ScaffoldedDeNovo_contig_169483	gi|358485511|ref|NC_006088.3 | GGA1	86.49	37	5	0	407	443	8328191	8328227	0.14	44.6	23	M
NorthernBobwhite_ScaffoldedDeNovo_contig_35182	gi|358485511|ref|NC_006088.3 | GGA1	81.44	846	145	8	495	1333	8366810	8367650	0	807	14649	M
NorthernBobwhite_ScaffoldedDeNovo_contig_46644	gi|358485511|ref|NC_006088.3 | GGA1	84.44	180	24	2	250	425	8366820	8366999	1e-47	194	1223	M
NorthernBobwhite_ScaffoldedDeNovo_contig_35323	gi|358485511|ref|NC_006088.3 | GGA1	77.35	967	206	4	495	1461	8366881	8367834	0	787	10572	M
NorthernBobwhite_ScaffoldedDeNovo_contig_2344	gi|358485511|ref|NC_006088.3 | GGA1	84.36	179	24	2	1	175	8366998	8366820	5e-47	192	1181	M
NorthernBobwhite_ScaffoldedDeNovo_contig_3064	gi|358485511|ref|NC_006088.3 | GGA1	76.15	478	78	8	37	483	8367083	8367555	4e-93	345	7619	M
NorthernBobwhite_ScaffoldedDeNovo_contig_89597	gi|358485511|ref|NC_006088.3 | GGA1	79.81	738	133	5	3	727	8367096	8367830	0	670	10235	M
NorthernBobwhite_ScaffoldedDeNovo_contig_122974	gi|358485511|ref|NC_006088.3 | GGA1	78.3	622	109	4	1	601	8367147	8367763	5e-150	535	12313	M
NorthernBobwhite_ScaffoldedDeNovo_contig_63441	gi|358485511|ref|NC_006088.3 | GGA1	76.89	476	86	3	1	452	8367201	8367676	5e-104	381	2164	M
NorthernBobwhite_ScaffoldedDeNovo_contig_131679	gi|358485511|ref|NC_006088.3 | GGA1	81.01	553	88	3	1	553	8367285	8367820	6e-149	531	6484	M
NorthernBobwhite_ScaffoldedDeNovo_contig_15807	gi|358485511|ref|NC_006088.3 | GGA1	81.82	517	77	3	10	526	8367296	8367795	5e-143	511	5845	M
NorthernBobwhite_ScaffoldedDeNovo_contig_84443	gi|358485511|ref|NC_006088.3 | GGA1	79	438	90	2	36	472	8367315	8367751	3e-107	392	8070	M
NorthernBobwhite_ScaffoldedDeNovo_contig_45314	gi|358485511|ref|NC_006088.3 | GGA1	83.84	328	51	1	1	326	8367322	8367649	4e-97	358	3797	M
NorthernBobwhite_ScaffoldedDeNovo_contig_134006	gi|358485511|ref|NC_006088.3 | GGA1	82.23	242	39	1	1	238	8367431	8367672	3e-62	242	1306	M
NorthernBobwhite_ScaffoldedDeNovo_contig_131355	gi|358485511|ref|NC_006088.3 | GGA1	88.15	211	25	0	1	211	8367432	8367642	7e-70	268	1716	M
NorthernBobwhite_ScaffoldedDeNovo_contig_181070	gi|358485511|ref|NC_006088.3 | GGA1	74.14	495	85	8	7	463	8367572	8367083	3e-88	329	2873	M
NorthernBobwhite_ScaffoldedDeNovo_contig_39200	gi|358485511|ref|NC_006088.3 | GGA1	84.07	546	84	3	129	672	8367575	8367031	4e-164	581	11416	M
NorthernBobwhite_ScaffoldedDeNovo_contig_40716	gi|358485511|ref|NC_006088.3 | GGA1	79	438	86	1	254	685	8367638	8367201	1e-107	394	3493	M
NorthernBobwhite_ScaffoldedDeNovo_contig_97788	gi|358485511|ref|NC_006088.3 | GGA1	79.94	354	67	1	1	350	8367712	8367359	2e-89	333	1909	M
NorthernBobwhite_ScaffoldedDeNovo_contig_67620	gi|358485511|ref|NC_006088.3 | GGA1	80.1	603	88	7	97	668	8367728	8367127	1e-152	544	7434	M
NorthernBobwhite_ScaffoldedDeNovo_contig_23613	gi|358485511|ref|NC_006088.3 | GGA1	80.53	339	53	3	1	326	8367737	8367399	2e-83	313	1676	M
NorthernBobwhite_ScaffoldedDeNovo_contig_107387	gi|358485511|ref|NC_006088.3 | GGA1	86.05	301	39	3	317	614	8367748	8367448	2e-92	343	1810	M
NorthernBobwhite_ScaffoldedDeNovo_contig_52431	gi|358485511|ref|NC_006088.3 | GGA1	78.11	370	53	2	3	349	8367763	8367399	4e-85	318	1417	M
NorthernBobwhite_ScaffoldedDeNovo_contig_95907	gi|358485511|ref|NC_006088.3 | GGA1	81.31	289	40	1	139	427	8367769	8367495	3e-75	286	1475	M
NorthernBobwhite_ScaffoldedDeNovo_contig_33663	gi|358485511|ref|NC_006088.3 | GGA1	83.49	539	86	2	3	541	8367782	8367247	3e-159	565	10688	M
NorthernBobwhite_ScaffoldedDeNovo_contig_55982	gi|358485511|ref|NC_006088.3 | GGA1	82.13	610	99	5	4	607	8367806	8367201	2e-168	596	10008	M
NorthernBobwhite_ScaffoldedDeNovo_contig_19582	gi|358485511|ref|NC_006088.3 | GGA1	84.45	598	86	2	7	599	8367834	8367239	0	657	14769	M
NorthernBobwhite_ScaffoldedDeNovo_contig_194143	gi|358485511|ref|NC_006088.3 | GGA1	92.59	27	2	0	78	104	8370084	8370058	0.13	41	21	M
NorthernBobwhite_ScaffoldedDeNovo_contig_2651	gi|358485511|ref|NC_006088.3 | GGA1	83.55	10399	1126	106	110037	120056	8482480	8492672	0	11090	91604	M
NorthernBobwhite_ScaffoldedDeNovo_contig_153793	gi|358485511|ref|NC_006088.3 | GGA1	81.94	360	49	5	139	485	8494098	8493742	3e-94	349	1	S
NorthernBobwhite_ScaffoldedDeNovo_contig_78745	gi|358485511|ref|NC_006088.3 | GGA1	77.78	144	28	2	66	205	8512828	8512685	1e-22	111	1	S
NorthernBobwhite_ScaffoldedDeNovo_contig_209491	gi|358485511|ref|NC_006088.3 | GGA1	100	24	0	0	274	297	8529384	8529361	0.015	44.6	169	M
NorthernBobwhite_ScaffoldedDeNovo_contig_204373	gi|358485511|ref|NC_006088.3 | GGA1	92.59	27	2	0	187	213	8532222	8532196	0.16	41	38	M
NorthernBobwhite_ScaffoldedDeNovo_contig_159775	gi|358485511|ref|NC_006088.3 | GGA1	86.84	38	2	1	966	1003	8532847	8532881	0.039	44.6	8	M
NorthernBobwhite_ScaffoldedDeNovo_contig_61372	gi|358485511|ref|NC_006088.3 | GGA1	87.18	39	4	1	344	382	8532847	8532884	0.018	44.6	117	M
NorthernBobwhite_ScaffoldedDeNovo_contig_128965	gi|358485511|ref|NC_006088.3 | GGA1	72.11	337	48	6	1	293	8543441	8543107	2e-49	199	1	S
NorthernBobwhite_ScaffoldedDeNovo_contig_36013	gi|358485511|ref|NC_006088.3 | GGA1	85.8	2078	192	24	7132	9157	8547594	8545568	0	2403	7	S
NorthernBobwhite_ScaffoldedDeNovo_contig_38889	gi|358485511|ref|NC_006088.3 | GGA1	88.64	44	5	0	249	292	8547962	8547919	3e-06	57.2	80	M
NorthernBobwhite_ScaffoldedDeNovo_contig_38888	gi|358485511|ref|NC_006088.3 | GGA1	81.45	442	78	1	15	456	8548873	8549310	1e-117	426	1	S
NorthernBobwhite_ScaffoldedDeNovo_contig_72678	gi|358485511|ref|NC_006088.3 | GGA1	86.83	463	44	2	1	446	8549439	8549901	6e-160	567	1	S
NorthernBobwhite_ScaffoldedDeNovo_contig_36012	gi|358485511|ref|NC_006088.3 | GGA1	89.39	396	35	3	1	392	8549898	8550290	2e-144	518	4	S
NorthernBobwhite_ScaffoldedDeNovo_contig_3870	gi|358485511|ref|NC_006088.3 | GGA1	80.36	56	7	1	498	549	8557748	8557693	0.0002	51.8	48	M
NorthernBobwhite_ScaffoldedDeNovo_contig_204411	gi|358485511|ref|NC_006088.3 | GGA1	86.67	135	17	1	248	382	8575284	8575417	3e-37	159	1	S
NorthernBobwhite_ScaffoldedDeNovo_contig_171354	gi|358485511|ref|NC_006088.3 | GGA1	79.18	413	80	5	1	408	8593887	8594298	1e-91	340	9340	M
NorthernBobwhite_ScaffoldedDeNovo_contig_57570	gi|358485511|ref|NC_006088.3 | GGA1	85.89	326	45	1	1	326	8596904	8597228	4e-103	378	1	S
NorthernBobwhite_ScaffoldedDeNovo_contig_66006	gi|358485511|ref|NC_006088.3 | GGA1	78.95	608	81	11	1	574	8596929	8596335	2e-143	513	1	S
NorthernBobwhite_ScaffoldedDeNovo_contig_107842	gi|358485511|ref|NC_006088.3 | GGA1	93.75	32	2	0	491	522	8611254	8611223	0.0006	50	158	M
NorthernBobwhite_ScaffoldedDeNovo_contig_28323	gi|358485511|ref|NC_006088.3 | GGA1	84.25	7207	810	68	8071	15041	8611841	8604724	0	7867	29099	M
NorthernBobwhite_ScaffoldedDeNovo_contig_193459	gi|358485511|ref|NC_006088.3 | GGA1	79.93	289	44	3	111	399	8613056	8612782	4e-67	259	1	S
NorthernBobwhite_ScaffoldedDeNovo_contig_109892	gi|358485511|ref|NC_006088.3 | GGA1	82.96	405	59	3	2855	3249	8615066	8614662	2e-113	416	3	S
NorthernBobwhite_ScaffoldedDeNovo_contig_59402	gi|358485511|ref|NC_006088.3 | GGA1	86.81	1160	116	13	2128	3267	8620929	8622071	0	1377	8	S
NorthernBobwhite_ScaffoldedDeNovo_contig_105188	gi|358485511|ref|NC_006088.3 | GGA1	84.36	1317	160	15	1	1288	8626915	8628214	0	1420	4	S
NorthernBobwhite_ScaffoldedDeNovo_contig_90337	gi|358485511|ref|NC_006088.3 | GGA1	89.32	637	36	5	1	621	8629125	8628505	0	848	2	S
NorthernBobwhite_ScaffoldedDeNovo_contig_210887	gi|358485511|ref|NC_006088.3 | GGA1	84.18	297	29	5	6	289	8630193	8630484	3e-85	318	1	S
NorthernBobwhite_ScaffoldedDeNovo_contig_90336	gi|358485511|ref|NC_006088.3 | GGA1	85.89	1907	201	20	3	1857	8630671	8632561	0	2197	1	S
NorthernBobwhite_ScaffoldedDeNovo_contig_128785	gi|358485511|ref|NC_006088.3 | GGA1	83.61	592	70	7	5	578	8634526	8635108	3e-176	623	7	M
NorthernBobwhite_ScaffoldedDeNovo_contig_93565	gi|358485511|ref|NC_006088.3 | GGA1	89.58	883	70	8	7	879	8634546	8633676	0	1162	3	S
NorthernBobwhite_ScaffoldedDeNovo_contig_41994	gi|358485511|ref|NC_006088.3 | GGA1	89.34	1219	108	6	4	1204	8644424	8643210	0	1606	1	S
NorthernBobwhite_ScaffoldedDeNovo_contig_3372	gi|358485511|ref|NC_006088.3 | GGA1	88.58	12500	1003	99	89568	101794	8692576	8680229	0	16040	207443	M
NorthernBobwhite_ScaffoldedDeNovo_contig_199310	gi|358485511|ref|NC_006088.3 | GGA1	81.32	364	38	5	1	334	8695864	8695501	6e-96	354	1	S
NorthernBobwhite_ScaffoldedDeNovo_contig_146241	gi|358485511|ref|NC_006088.3 | GGA1	84.77	893	85	7	1	880	8695962	8696816	0	1012	1	S
NorthernBobwhite_ScaffoldedDeNovo_contig_51742	gi|358485511|ref|NC_006088.3 | GGA1	80.21	470	63	7	20	462	8699555	8699089	5e-117	425	1	S
NorthernBobwhite_ScaffoldedDeNovo_contig_87254	gi|358485511|ref|NC_006088.3 | GGA1	81.69	71	7	2	1415	1482	8699558	8699625	2e-08	66.2	172	M
NorthernBobwhite_ScaffoldedDeNovo_contig_51028	gi|358485511|ref|NC_006088.3 | GGA1	83.61	61	8	2	275	333	8699563	8699623	1e-05	59	60	M
NorthernBobwhite_ScaffoldedDeNovo_contig_13479	gi|358485511|ref|NC_006088.3 | GGA1	88.89	36	4	0	95	130	8699607	8699572	0.001	48.2	179	M
NorthernBobwhite_ScaffoldedDeNovo_contig_184301	gi|358485511|ref|NC_006088.3 | GGA1	93.55	31	2	0	1	31	8699624	8699594	0.001	48.2	101	M
NorthernBobwhite_ScaffoldedDeNovo_contig_37002	gi|358485511|ref|NC_006088.3 | GGA1	90	30	3	0	115	144	8725155	8725126	0.16	41	57	M
NorthernBobwhite_ScaffoldedDeNovo_contig_148973	gi|358485511|ref|NC_006088.3 | GGA1	81.37	553	53	3	182	684	8781160	8780608	3e-159	565	2	S
NorthernBobwhite_ScaffoldedDeNovo_contig_97954	gi|358485511|ref|NC_006088.3 | GGA1	84.83	422	48	3	435	855	8797803	8798209	2e-131	473	4	M
NorthernBobwhite_ScaffoldedDeNovo_contig_4490	gi|358485511|ref|NC_006088.3 | GGA1	84.79	9420	1023	88	38714	47881	8820035	8829296	0	10500	184559	M
NorthernBobwhite_ScaffoldedDeNovo_contig_51958	gi|358485511|ref|NC_006088.3 | GGA1	75.9	83	19	1	402	484	8829245	8829326	9e-06	57.2	89	M
NorthernBobwhite_ScaffoldedDeNovo_contig_216787	gi|358485511|ref|NC_006088.3 | GGA1	75.68	74	14	2	261	331	8829254	8829326	0.001	48.2	306	M
NorthernBobwhite_ScaffoldedDeNovo_contig_58341	gi|358485511|ref|NC_006088.3 | GGA1	77.5	80	12	3	929	1004	8829324	8829247	2e-05	55.4	275	M
NorthernBobwhite_ScaffoldedDeNovo_contig_216425	gi|358485511|ref|NC_006088.3 | GGA1	75	76	19	0	164	239	8829327	8829252	0.0001	51.8	311	M
NorthernBobwhite_ScaffoldedDeNovo_contig_207331	gi|358485511|ref|NC_006088.3 | GGA1	100	22	0	0	286	307	8863793	8863772	0.24	41	25	M
NorthernBobwhite_ScaffoldedDeNovo_contig_184855	gi|358485511|ref|NC_006088.3 | GGA1	81.1	492	85	3	6	497	8893420	8893903	2e-128	462	255	M
NorthernBobwhite_ScaffoldedDeNovo_contig_165871	gi|358485511|ref|NC_006088.3 | GGA1	83.18	440	63	3	1	439	8894312	8893883	8e-127	457	1	S
NorthernBobwhite_ScaffoldedDeNovo_contig_122344	gi|358485511|ref|NC_006088.3 | GGA1	86.98	384	42	1	22	405	8901488	8901863	1e-130	470	1	S
NorthernBobwhite_ScaffoldedDeNovo_contig_64375	gi|358485511|ref|NC_006088.3 | GGA1	77.06	728	92	10	1	719	8902521	8901860	2e-164	583	2	S
NorthernBobwhite_ScaffoldedDeNovo_contig_54883	gi|358485511|ref|NC_006088.3 | GGA1	76.89	1034	130	11	1	928	8904012	8902982	0	836	499	M
NorthernBobwhite_ScaffoldedDeNovo_contig_142665	gi|358485511|ref|NC_006088.3 | GGA1	82.91	626	87	6	374	993	8904706	8904095	0	637	10309	M
NorthernBobwhite_ScaffoldedDeNovo_contig_210985	gi|358485511|ref|NC_006088.3 | GGA1	84.52	168	25	1	344	510	8908411	8908578	4e-44	183	1	S
NorthernBobwhite_ScaffoldedDeNovo_contig_188234	gi|358485511|ref|NC_006088.3 | GGA1	84.24	165	25	1	95	258	8908575	8908411	2e-42	178	1	S
NorthernBobwhite_ScaffoldedDeNovo_contig_16852	gi|358485511|ref|NC_006088.3 | GGA1	86.51	3935	375	32	11991	15836	8917209	8921076	0	4699	37776	M
NorthernBobwhite_ScaffoldedDeNovo_contig_35872	gi|358485511|ref|NC_006088.3 | GGA1	85.66	760	109	0	1	760	8940871	8940112	0	879	7485	M
NorthernBobwhite_ScaffoldedDeNovo_contig_13536	gi|358485511|ref|NC_006088.3 | GGA1	88.1	311	34	2	371	679	8944659	8944350	7e-106	389	2	S
NorthernBobwhite_ScaffoldedDeNovo_contig_129636	gi|358485511|ref|NC_006088.3 | GGA1	86.22	392	53	1	21	412	8944920	8945310	6e-128	461	1	S
NorthernBobwhite_ScaffoldedDeNovo_contig_80302	gi|358485511|ref|NC_006088.3 | GGA1	80.46	655	70	9	1	599	8945317	8945969	2e-174	616	1	S
NorthernBobwhite_ScaffoldedDeNovo_contig_18099	gi|358485511|ref|NC_006088.3 | GGA1	84.8	329	41	6	3	323	8948448	8948121	2e-94	349	7093	M
NorthernBobwhite_ScaffoldedDeNovo_contig_13537	gi|358485511|ref|NC_006088.3 | GGA1	82.97	12260	1579	122	69843	81795	9022475	9034532	0	12610	107814	M
NorthernBobwhite_ScaffoldedDeNovo_contig_200441	gi|358485511|ref|NC_006088.3 | GGA1	92.86	28	2	0	167	194	9029070	9029097	0.059	42.8	71	M
NorthernBobwhite_ScaffoldedDeNovo_contig_163976	gi|358485511|ref|NC_006088.3 | GGA1	85.76	330	41	2	3	332	9044722	9045045	2e-103	379	2	S
NorthernBobwhite_ScaffoldedDeNovo_contig_120431	gi|358485511|ref|NC_006088.3 | GGA1	84.16	764	95	6	1	750	9049364	9050115	0	829	4106	M
NorthernBobwhite_ScaffoldedDeNovo_contig_212972	gi|358485511|ref|NC_006088.3 | GGA1	76.57	734	128	14	1	709	9050311	9051025	3e-147	526	1	S
NorthernBobwhite_ScaffoldedDeNovo_contig_206961	gi|358485511|ref|NC_006088.3 | GGA1	73.42	158	28	3	1	144	9051025	9050868	7e-18	95.1	110	M
NorthernBobwhite_ScaffoldedDeNovo_contig_145966	gi|358485511|ref|NC_006088.3 | GGA1	84.15	366	47	2	564	918	9051365	9051000	4e-109	399	3	S
NorthernBobwhite_ScaffoldedDeNovo_contig_136942	gi|358485511|ref|NC_006088.3 | GGA1	94.44	36	1	1	86	120	9056678	9056643	2e-05	53.6	357	M
NorthernBobwhite_ScaffoldedDeNovo_contig_158550	gi|358485511|ref|NC_006088.3 | GGA1	82.79	401	59	5	152	543	9065182	9065581	2e-109	399	1	S
NorthernBobwhite_ScaffoldedDeNovo_contig_168510	gi|358485511|ref|NC_006088.3 | GGA1	81.77	406	63	6	1	397	9065585	9065182	6e-104	381	1	S
NorthernBobwhite_ScaffoldedDeNovo_contig_49154	gi|358485511|ref|NC_006088.3 | GGA1	80.24	2885	389	33	2875	5653	9075270	9072461	0	2648	1954	M
NorthernBobwhite_ScaffoldedDeNovo_contig_49153	gi|358485511|ref|NC_006088.3 | GGA1	85.75	2211	264	14	9115	11292	9088578	9090770	0	2551	7817	M
NorthernBobwhite_ScaffoldedDeNovo_contig_70558	gi|358485511|ref|NC_006088.3 | GGA1	85.77	274	37	1	11	282	9094795	9095068	3e-84	316	2	S
NorthernBobwhite_ScaffoldedDeNovo_contig_166940	gi|358485511|ref|NC_006088.3 | GGA1	93.22	59	4	0	1	59	9097692	9097750	4e-16	89.7	344	M
NorthernBobwhite_ScaffoldedDeNovo_contig_47590	gi|358485511|ref|NC_006088.3 | GGA1	85.74	1325	156	13	148	1444	9099900	9101219	0	1508	102	M
NorthernBobwhite_ScaffoldedDeNovo_contig_29922	gi|358485511|ref|NC_006088.3 | GGA1	79.12	5537	821	64	13379	18712	9111780	9106376	0	4787	59760	M
NorthernBobwhite_ScaffoldedDeNovo_contig_107500	gi|358485511|ref|NC_006088.3 | GGA1	90.91	33	2	1	124	156	9126823	9126792	0.076	42.8	57	M
NorthernBobwhite_ScaffoldedDeNovo_contig_76532	gi|358485511|ref|NC_006088.3 | GGA1	76.51	2972	490	46	1421	4239	9129980	9127064	0	2194	41163	M
NorthernBobwhite_ScaffoldedDeNovo_contig_73337	gi|358485511|ref|NC_006088.3 | GGA1	86.39	294	38	2	1	293	9130752	9131044	2e-92	343	2	S
NorthernBobwhite_ScaffoldedDeNovo_contig_146790	gi|358485511|ref|NC_006088.3 | GGA1	80.25	471	70	6	3	450	9131489	9131959	5e-117	425	1	S
NorthernBobwhite_ScaffoldedDeNovo_contig_73336	gi|358485511|ref|NC_006088.3 | GGA1	85.5	669	54	9	3	655	9132175	9132816	0	767	2	S
NorthernBobwhite_ScaffoldedDeNovo_contig_160494	gi|358485511|ref|NC_006088.3 | GGA1	80.63	413	66	6	2	404	9134714	9134306	8e-101	370	1	S
NorthernBobwhite_ScaffoldedDeNovo_contig_203990	gi|358485511|ref|NC_006088.3 | GGA1	77.53	267	48	1	106	372	9135134	9134880	1e-54	217	2	S
NorthernBobwhite_ScaffoldedDeNovo_contig_163723	gi|358485511|ref|NC_006088.3 | GGA1	81.6	250	42	3	271	517	9135533	9135285	2e-59	233	2	S
NorthernBobwhite_ScaffoldedDeNovo_contig_40750	gi|358485511|ref|NC_006088.3 | GGA1	81.96	1308	189	10	1	1294	9140881	9142155	0	1292	1	S
NorthernBobwhite_ScaffoldedDeNovo_contig_166811	gi|358485511|ref|NC_006088.3 | GGA1	78.73	597	77	9	1	556	9142729	9142142	2e-142	509	1	S
NorthernBobwhite_ScaffoldedDeNovo_contig_205763	gi|358485511|ref|NC_006088.3 | GGA1	80.17	595	81	6	1	565	9142729	9142142	7e-154	547	1	S
NorthernBobwhite_ScaffoldedDeNovo_contig_134049	gi|358485511|ref|NC_006088.3 | GGA1	79.69	192	39	0	275	466	9154838	9155029	3e-40	170	308	M
NorthernBobwhite_ScaffoldedDeNovo_contig_54098	gi|358485511|ref|NC_006088.3 | GGA1	81.25	192	36	0	337	528	9155029	9154838	1e-44	185	629	M
NorthernBobwhite_ScaffoldedDeNovo_contig_47834	gi|358485511|ref|NC_006088.3 | GGA1	81.42	748	118	11	569	1310	9164316	9165048	0	691	2	S
NorthernBobwhite_ScaffoldedDeNovo_contig_14799	gi|358485511|ref|NC_006088.3 | GGA1	80.08	5664	763	68	1039	6434	9170906	9165340	0	5151	54412	M
NorthernBobwhite_ScaffoldedDeNovo_contig_144013	gi|358485511|ref|NC_006088.3 | GGA1	83.96	611	80	4	7	600	9177469	9178078	0	659	1	S
NorthernBobwhite_ScaffoldedDeNovo_contig_144014	gi|358485511|ref|NC_006088.3 | GGA1	83.39	584	78	5	23	589	9177497	9178078	8e-173	610	1	S
NorthernBobwhite_ScaffoldedDeNovo_contig_73191	gi|358485511|ref|NC_006088.3 | GGA1	84.77	1490	175	15	208	1684	9179503	9178053	0	1644	2	S
NorthernBobwhite_ScaffoldedDeNovo_contig_11941	gi|358485511|ref|NC_006088.3 | GGA1	79.08	6420	920	93	31994	38125	9187836	9181552	0	5485	40868	M
NorthernBobwhite_ScaffoldedDeNovo_contig_184380	gi|358485511|ref|NC_006088.3 | GGA1	86.21	29	4	0	207	235	9194664	9194692	5.9	35.6	2	S
NorthernBobwhite_ScaffoldedDeNovo_contig_195637	gi|358485511|ref|NC_006088.3 | GGA1	85.29	34	5	0	578	611	9209322	9209355	1.3	39.2	1	S
NorthernBobwhite_ScaffoldedDeNovo_contig_134855	gi|358485511|ref|NC_006088.3 | GGA1	80.8	250	41	3	47	290	9226866	9227114	5e-58	228	1	S
NorthernBobwhite_ScaffoldedDeNovo_contig_92240	gi|358485511|ref|NC_006088.3 | GGA1	84.56	680	66	8	47	697	9228295	9227626	0	753	2	S
NorthernBobwhite_ScaffoldedDeNovo_contig_15797	gi|358485511|ref|NC_006088.3 | GGA1	84.76	4154	493	37	6519	10588	9242665	9246762	0	4598	273	M
NorthernBobwhite_ScaffoldedDeNovo_contig_129426	gi|358485511|ref|NC_006088.3 | GGA1	83.96	910	110	8	1971	2854	9266640	9267539	0	980	2	S
NorthernBobwhite_ScaffoldedDeNovo_contig_159439	gi|358485511|ref|NC_006088.3 | GGA1	85.11	47	5	1	1634	1680	9290380	9290424	0.0006	51.8	18	M
NorthernBobwhite_ScaffoldedDeNovo_contig_425	gi|358485511|ref|NC_006088.3 | GGA1	84.92	13690	1441	127	52996	66327	9319281	9332705	0	15370	81286	M
NorthernBobwhite_ScaffoldedDeNovo_contig_14732	gi|358485511|ref|NC_006088.3 | GGA1	70.99	131	29	5	223	346	9330889	9331017	4e-07	62.6	48	M
NorthernBobwhite_ScaffoldedDeNovo_contig_199873	gi|358485511|ref|NC_006088.3 | GGA1	90.32	31	3	0	459	489	9330945	9330915	0.082	42.8	18	M
NorthernBobwhite_ScaffoldedDeNovo_contig_89927	gi|358485511|ref|NC_006088.3 | GGA1	76.56	64	14	1	883	946	9330953	9330891	0.043	44.6	8	M
NorthernBobwhite_ScaffoldedDeNovo_contig_95060	gi|358485511|ref|NC_006088.3 | GGA1	77.61	201	38	3	191	386	9334535	9334337	4e-35	152	2	M
NorthernBobwhite_ScaffoldedDeNovo_contig_95061	gi|358485511|ref|NC_006088.3 | GGA1	77.61	201	38	3	191	386	9334535	9334337	4e-35	152	2	M
NorthernBobwhite_ScaffoldedDeNovo_contig_114691	gi|358485511|ref|NC_006088.3 | GGA1	82.28	694	98	7	1	673	9386085	9385396	0	688	1	S
NorthernBobwhite_ScaffoldedDeNovo_contig_27198	gi|358485511|ref|NC_006088.3 | GGA1	83.49	430	49	5	832	1246	9386873	9387295	3e-125	453	3	S
NorthernBobwhite_ScaffoldedDeNovo_contig_13996	gi|358485511|ref|NC_006088.3 | GGA1	91.19	420	34	2	510	926	9388403	9387984	7e-165	585	3	S
NorthernBobwhite_ScaffoldedDeNovo_contig_46739	gi|358485511|ref|NC_006088.3 | GGA1	75.39	1093	140	21	2863	3889	9389813	9388784	0	780	5	S
NorthernBobwhite_ScaffoldedDeNovo_contig_13997	gi|358485511|ref|NC_006088.3 | GGA1	80.18	439	49	6	129	563	9390270	9390674	3e-111	407	3	S
NorthernBobwhite_ScaffoldedDeNovo_contig_151513	gi|358485511|ref|NC_006088.3 | GGA1	84.68	881	110	10	2	869	9393490	9392622	0	958	1	S
NorthernBobwhite_ScaffoldedDeNovo_contig_55452	gi|358485511|ref|NC_006088.3 | GGA1	80.39	3166	399	47	10758	13799	9396533	9393466	0	2899	167	M
NorthernBobwhite_ScaffoldedDeNovo_contig_22760	gi|358485511|ref|NC_006088.3 | GGA1	81.75	6411	805	74	27235	33400	9443796	9450086	0	6282	4490	M
NorthernBobwhite_ScaffoldedDeNovo_contig_105598	gi|358485511|ref|NC_006088.3 | GGA1	82.98	47	8	0	105	151	9444423	9444377	0.0007	50	44	M
NorthernBobwhite_ScaffoldedDeNovo_contig_118341	gi|358485511|ref|NC_006088.3 | GGA1	71.43	462	74	14	1	423	9447981	9448423	2e-57	228	504	M
NorthernBobwhite_ScaffoldedDeNovo_contig_120092	gi|358485511|ref|NC_006088.3 | GGA1	77.72	184	32	4	6	185	9448255	9448433	1e-30	138	52	M
NorthernBobwhite_ScaffoldedDeNovo_contig_145764	gi|358485511|ref|NC_006088.3 | GGA1	85	340	43	1	1	340	9454473	9454142	9e-106	387	1	S
NorthernBobwhite_ScaffoldedDeNovo_contig_66665	gi|358485511|ref|NC_006088.3 | GGA1	85.71	224	30	2	3	225	9455410	9455632	2e-65	253	323	M
NorthernBobwhite_ScaffoldedDeNovo_contig_189176	gi|358485511|ref|NC_006088.3 | GGA1	87.32	473	23	4	1	473	9456474	9456039	4e-169	598	1	S
NorthernBobwhite_ScaffoldedDeNovo_contig_47616	gi|358485511|ref|NC_006088.3 | GGA1	86.88	1395	132	15	4562	5937	9457811	9456449	0	1669	208	M
NorthernBobwhite_ScaffoldedDeNovo_contig_73886	gi|358485511|ref|NC_006088.3 | GGA1	84.19	778	92	9	2342	3100	9458753	9457988	0	836	4	S
NorthernBobwhite_ScaffoldedDeNovo_contig_159522	gi|358485511|ref|NC_006088.3 | GGA1	75.72	276	66	1	14	288	9465517	9465242	3e-47	192	302	M
NorthernBobwhite_ScaffoldedDeNovo_contig_11967	gi|358485511|ref|NC_006088.3 | GGA1	84.96	718	77	6	181	873	9532912	9533623	0	809	10183	M
NorthernBobwhite_ScaffoldedDeNovo_contig_168880	gi|358485511|ref|NC_006088.3 | GGA1	79.03	310	43	6	55	349	9536632	9536330	3e-67	259	653	M
NorthernBobwhite_ScaffoldedDeNovo_contig_40003	gi|358485511|ref|NC_006088.3 | GGA1	78.71	310	44	6	60	354	9536632	9536330	4e-66	255	653	M
NorthernBobwhite_ScaffoldedDeNovo_contig_180450	gi|358485511|ref|NC_006088.3 | GGA1	77.78	63	14	0	1846	1908	9555832	9555894	0.0005	51.8	22	M
NorthernBobwhite_ScaffoldedDeNovo_contig_43504	gi|358485511|ref|NC_006088.3 | GGA1	88.24	51	6	0	1705	1755	9555841	9555891	4e-07	66.2	42	M
NorthernBobwhite_ScaffoldedDeNovo_contig_201934	gi|358485511|ref|NC_006088.3 | GGA1	84.62	39	4	1	303	341	9555857	9555893	0.15	41	35	M
NorthernBobwhite_ScaffoldedDeNovo_contig_98995	gi|358485511|ref|NC_006088.3 | GGA1	81.67	60	11	0	870	929	9555897	9555838	2e-06	59	29	M
NorthernBobwhite_ScaffoldedDeNovo_contig_114254	gi|358485511|ref|NC_006088.3 | GGA1	96.15	26	1	0	389	414	9556138	9556113	0.066	42.8	22	M
NorthernBobwhite_ScaffoldedDeNovo_contig_178950	gi|358485511|ref|NC_006088.3 | GGA1	91.18	34	3	0	241	274	9582144	9582177	0.001	48.2	222	M
NorthernBobwhite_ScaffoldedDeNovo_contig_114789	gi|358485511|ref|NC_006088.3 | GGA1	82.3	356	50	4	5	347	9586026	9586381	2e-95	352	2746	M
NorthernBobwhite_ScaffoldedDeNovo_contig_47281	gi|358485511|ref|NC_006088.3 | GGA1	77.54	374	75	3	117	487	9586064	9586431	1e-76	291	1979	M
NorthernBobwhite_ScaffoldedDeNovo_contig_136191	gi|358485511|ref|NC_006088.3 | GGA1	80.92	262	45	1	3	259	9586169	9586430	7e-64	248	1560	M
NorthernBobwhite_ScaffoldedDeNovo_contig_191248	gi|358485511|ref|NC_006088.3 | GGA1	75.52	290	46	5	13	298	9613281	9613549	2e-50	203	1	S
NorthernBobwhite_ScaffoldedDeNovo_contig_214589	gi|358485511|ref|NC_006088.3 | GGA1	96.55	29	1	0	365	393	9622654	9622682	0.001	48.2	21	M
NorthernBobwhite_ScaffoldedDeNovo_contig_173085	gi|358485511|ref|NC_006088.3 | GGA1	92.31	39	3	0	382	420	9622672	9622710	9e-06	57.2	110	M
NorthernBobwhite_ScaffoldedDeNovo_contig_4299	gi|358485511|ref|NC_006088.3 | GGA1	81.39	720	79	12	34	698	9633514	9634233	0	690	2	S
NorthernBobwhite_ScaffoldedDeNovo_contig_134793	gi|358485511|ref|NC_006088.3 | GGA1	81.94	299	36	7	22	312	9646836	9646548	2e-73	280	379	M
NorthernBobwhite_ScaffoldedDeNovo_contig_22725	gi|358485511|ref|NC_006088.3 | GGA1	80.07	803	106	9	5	766	9655191	9655980	0	735	1	S
NorthernBobwhite_ScaffoldedDeNovo_contig_22726	gi|358485511|ref|NC_006088.3 | GGA1	75.56	405	57	9	229	595	9656371	9655971	5e-74	282	2	S
NorthernBobwhite_ScaffoldedDeNovo_contig_168358	gi|358485511|ref|NC_006088.3 | GGA1	81.48	54	7	2	393	444	9668810	9668862	0.015	46.4	241	M
NorthernBobwhite_ScaffoldedDeNovo_contig_190095	gi|358485511|ref|NC_006088.3 | GGA1	86.31	431	45	5	1	423	9681672	9682096	2e-140	502	7345	M
NorthernBobwhite_ScaffoldedDeNovo_contig_172727	gi|358485511|ref|NC_006088.3 | GGA1	86.62	471	51	2	1	459	9681981	9681511	6e-160	567	11914	M
NorthernBobwhite_ScaffoldedDeNovo_contig_53972	gi|358485511|ref|NC_006088.3 | GGA1	84.35	441	58	3	1	436	9682101	9681667	7e-134	480	7769	M
NorthernBobwhite_ScaffoldedDeNovo_contig_1380	gi|358485511|ref|NC_006088.3 | GGA1	87.3	14137	1189	99	286336	300113	9718777	9704889	0	17500	395080	M
NorthernBobwhite_ScaffoldedDeNovo_contig_31278	gi|358485511|ref|NC_006088.3 | GGA1	83.55	152	24	1	13	163	9771756	9771605	1e-36	158	1656	M
NorthernBobwhite_ScaffoldedDeNovo_contig_213874	gi|358485511|ref|NC_006088.3 | GGA1	82.98	47	8	0	99	145	9790017	9789971	0.0004	50	231	M
NorthernBobwhite_ScaffoldedDeNovo_contig_177984	gi|358485511|ref|NC_006088.3 | GGA1	78.81	519	69	5	3	480	9790143	9790661	3e-126	455	1	S
NorthernBobwhite_ScaffoldedDeNovo_contig_218584	gi|358485511|ref|NC_006088.3 | GGA1	91.49	47	4	0	366	412	9800813	9800859	2e-09	68	385	M
NorthernBobwhite_ScaffoldedDeNovo_contig_184276	gi|358485511|ref|NC_006088.3 | GGA1	88.39	155	14	2	405	555	9835318	9835472	3e-47	194	3	S
NorthernBobwhite_ScaffoldedDeNovo_contig_82448	gi|358485511|ref|NC_006088.3 | GGA1	96.3	27	1	0	2210	2236	9850792	9850766	0.094	44.6	7	M
NorthernBobwhite_ScaffoldedDeNovo_contig_88229	gi|358485511|ref|NC_006088.3 | GGA1	87.88	33	4	0	97	129	9856039	9856071	0.068	42.8	17	M
NorthernBobwhite_ScaffoldedDeNovo_contig_211899	gi|358485511|ref|NC_006088.3 | GGA1	78.57	98	20	1	472	568	9871645	9871742	1e-12	78.8	18	M
NorthernBobwhite_ScaffoldedDeNovo_contig_68113	gi|358485511|ref|NC_006088.3 | GGA1	82.95	176	24	2	1	175	9913319	9913489	3e-43	179	1738	M
NorthernBobwhite_ScaffoldedDeNovo_contig_122759	gi|358485511|ref|NC_006088.3 | GGA1	68.84	337	83	8	1	321	9941641	9941311	8e-25	118	3	M
NorthernBobwhite_ScaffoldedDeNovo_contig_201930	gi|358485511|ref|NC_006088.3 | GGA1	86.05	43	5	1	29	70	9951471	9951513	0.001	48.2	491	M
NorthernBobwhite_ScaffoldedDeNovo_contig_147305	gi|358485511|ref|NC_006088.3 | GGA1	86.05	43	5	1	354	395	9951513	9951471	0.001	48.2	504	M
NorthernBobwhite_ScaffoldedDeNovo_contig_17653	gi|358485511|ref|NC_006088.3 | GGA1	79.94	997	136	16	3	956	10007739	10006764	0	883	1	S
NorthernBobwhite_ScaffoldedDeNovo_contig_144488	gi|358485511|ref|NC_006088.3 | GGA1	83.31	815	93	8	253	1056	10008197	10008979	0	859	5	S
NorthernBobwhite_ScaffoldedDeNovo_contig_50243	gi|358485511|ref|NC_006088.3 | GGA1	81.47	367	44	7	1	356	10012473	10012826	3e-93	345	2	M
NorthernBobwhite_ScaffoldedDeNovo_contig_50242	gi|358485511|ref|NC_006088.3 | GGA1	87.95	166	16	2	639	804	10012959	10012798	2e-50	205	2	S
NorthernBobwhite_ScaffoldedDeNovo_contig_215316	gi|358485511|ref|NC_006088.3 | GGA1	75.76	99	19	4	469	564	10044164	10044260	3e-06	57.2	46	M
NorthernBobwhite_ScaffoldedDeNovo_contig_25969	gi|358485511|ref|NC_006088.3 | GGA1	74.29	105	25	2	3407	3510	10044167	10044270	2e-06	60.8	604	M
NorthernBobwhite_ScaffoldedDeNovo_contig_58081	gi|358485511|ref|NC_006088.3 | GGA1	70.59	85	17	1	1063	1139	10044178	10044262	0.052	44.6	98	M
NorthernBobwhite_ScaffoldedDeNovo_contig_69074	gi|358485511|ref|NC_006088.3 | GGA1	77.78	72	16	0	227	298	10044259	10044188	1e-05	59	238	M
NorthernBobwhite_ScaffoldedDeNovo_contig_106910	gi|358485511|ref|NC_006088.3 | GGA1	74.29	70	18	0	116	185	10044260	10044191	0.065	46.4	106	M
NorthernBobwhite_ScaffoldedDeNovo_contig_131801	gi|358485511|ref|NC_006088.3 | GGA1	91.67	420	17	8	7	424	10044617	10044214	9e-164	580	2	M
NorthernBobwhite_ScaffoldedDeNovo_contig_7413	gi|358485511|ref|NC_006088.3 | GGA1	84.21	12141	1333	121	39251	51077	10044905	10056775	0	13230	107844	M
NorthernBobwhite_ScaffoldedDeNovo_contig_174226	gi|358485511|ref|NC_006088.3 | GGA1	88.94	235	26	0	178	412	10066028	10066262	9e-82	307	14770	M
NorthernBobwhite_ScaffoldedDeNovo_contig_88094	gi|358485511|ref|NC_006088.3 | GGA1	87.66	235	29	0	179	413	10066028	10066262	2e-77	293	13901	M
NorthernBobwhite_ScaffoldedDeNovo_contig_85202	gi|358485511|ref|NC_006088.3 | GGA1	72.41	598	92	10	202	727	10113658	10114254	5e-96	356	2	S
NorthernBobwhite_ScaffoldedDeNovo_contig_77435	gi|358485511|ref|NC_006088.3 | GGA1	83.05	1015	136	17	2322	3314	10114565	10115565	0	1011	3	S
NorthernBobwhite_ScaffoldedDeNovo_contig_146552	gi|358485511|ref|NC_006088.3 | GGA1	76.89	1021	153	23	1	968	10117523	10116533	0	749	1	S
NorthernBobwhite_ScaffoldedDeNovo_contig_34508	gi|358485511|ref|NC_006088.3 | GGA1	83.35	1129	145	25	6156	7251	10119032	10117914	0	1115	39	M
NorthernBobwhite_ScaffoldedDeNovo_contig_165790	gi|358485511|ref|NC_006088.3 | GGA1	77.88	104	16	2	1	104	10123336	10123240	8e-14	82.4	238	M
NorthernBobwhite_ScaffoldedDeNovo_contig_181348	gi|358485511|ref|NC_006088.3 | GGA1	78.31	438	71	5	10	424	10125815	10126251	5e-98	361	1	S
NorthernBobwhite_ScaffoldedDeNovo_contig_170694	gi|358485511|ref|NC_006088.3 | GGA1	87.57	354	40	2	1	354	10144912	10145261	2e-120	435	1	S
NorthernBobwhite_ScaffoldedDeNovo_contig_65271	gi|358485511|ref|NC_006088.3 | GGA1	90.49	389	35	1	8	396	10145874	10145488	1e-149	533	2	M
NorthernBobwhite_ScaffoldedDeNovo_contig_151501	gi|358485511|ref|NC_006088.3 | GGA1	84.02	701	86	10	11	707	10146544	10145866	0	738	1	S
NorthernBobwhite_ScaffoldedDeNovo_contig_180141	gi|358485511|ref|NC_006088.3 | GGA1	92.31	39	3	0	1	39	10146767	10146729	5e-06	57.2	123	M
NorthernBobwhite_ScaffoldedDeNovo_contig_70551	gi|358485511|ref|NC_006088.3 | GGA1	82.22	45	8	0	200	244	10150130	10150086	0.014	46.4	136	M
NorthernBobwhite_ScaffoldedDeNovo_contig_26024	gi|358485511|ref|NC_006088.3 | GGA1	84.31	5251	635	49	19429	24564	10166833	10172009	0	5705	36105	M
NorthernBobwhite_ScaffoldedDeNovo_contig_6585	gi|358485511|ref|NC_006088.3 | GGA1	88.31	1967	188	14	114	2047	10180127	10182084	0	2486	5	S
NorthernBobwhite_ScaffoldedDeNovo_contig_4109	gi|358485511|ref|NC_006088.3 | GGA1	83.38	5999	729	75	152	6019	10188699	10194560	0	6228	20292	M
NorthernBobwhite_ScaffoldedDeNovo_contig_130056	gi|358485511|ref|NC_006088.3 | GGA1	73.84	409	78	11	10	412	10233334	10233719	9e-59	232	1974	M
NorthernBobwhite_ScaffoldedDeNovo_contig_103655	gi|358485511|ref|NC_006088.3 | GGA1	73.5	317	61	9	158	461	10233411	10233717	1e-41	174	126	M
NorthernBobwhite_ScaffoldedDeNovo_contig_130417	gi|358485511|ref|NC_006088.3 | GGA1	79.55	132	22	1	209	340	10233555	10233681	6e-26	122	5	M
NorthernBobwhite_ScaffoldedDeNovo_contig_135217	gi|358485511|ref|NC_006088.3 | GGA1	87.2	125	16	0	1	125	10233592	10233716	8e-36	154	260	M
NorthernBobwhite_ScaffoldedDeNovo_contig_67964	gi|358485511|ref|NC_006088.3 | GGA1	71.67	473	106	12	1	458	10233638	10233179	2e-55	221	102	M
NorthernBobwhite_ScaffoldedDeNovo_contig_208597	gi|358485511|ref|NC_006088.3 | GGA1	88.8	125	14	0	176	300	10233716	10233592	2e-38	163	358	M
NorthernBobwhite_ScaffoldedDeNovo_contig_153727	gi|358485511|ref|NC_006088.3 | GGA1	83.2	1452	176	15	4	1440	10233778	10235176	0	1512	1	S
NorthernBobwhite_ScaffoldedDeNovo_contig_60376	gi|358485511|ref|NC_006088.3 | GGA1	85.53	1410	173	10	22	1424	10236566	10235181	0	1606	2	M
NorthernBobwhite_ScaffoldedDeNovo_contig_60375	gi|358485511|ref|NC_006088.3 | GGA1	80.75	691	115	8	91	776	10236895	10237572	1e-177	627	1	S
NorthernBobwhite_ScaffoldedDeNovo_contig_21358	gi|358485511|ref|NC_006088.3 | GGA1	82.7	3398	404	34	39353	42636	10254567	10251240	0	3490	16918	M
NorthernBobwhite_ScaffoldedDeNovo_contig_189004	gi|358485511|ref|NC_006088.3 | GGA1	92.18	473	31	2	4	475	10255548	10256015	0	682	1	S
NorthernBobwhite_ScaffoldedDeNovo_contig_106884	gi|358485511|ref|NC_006088.3 | GGA1	78.18	55	11	1	133	186	10273400	10273454	0.11	42.8	19	M
NorthernBobwhite_ScaffoldedDeNovo_contig_11152	gi|358485511|ref|NC_006088.3 | GGA1	79.69	64	9	2	540	603	10273431	10273490	0.0005	51.8	34	M
NorthernBobwhite_ScaffoldedDeNovo_contig_123311	gi|358485511|ref|NC_006088.3 | GGA1	84.62	52	8	0	1296	1347	10273464	10273413	1e-05	59	193	M
NorthernBobwhite_ScaffoldedDeNovo_contig_198873	gi|358485511|ref|NC_006088.3 | GGA1	75	84	9	4	209	292	10288997	10289068	0.0003	50	28	M
NorthernBobwhite_ScaffoldedDeNovo_contig_199897	gi|358485511|ref|NC_006088.3 | GGA1	82.26	62	9	1	86	145	10289002	10289063	7e-07	60.8	34	M
NorthernBobwhite_ScaffoldedDeNovo_contig_130270	gi|358485511|ref|NC_006088.3 | GGA1	81.54	65	11	1	3014	3078	10289059	10288996	2e-06	60.8	63	M
NorthernBobwhite_ScaffoldedDeNovo_contig_60043	gi|358485511|ref|NC_006088.3 | GGA1	80.28	71	8	2	23300	23364	10289068	10288998	4e-06	62.6	93	M
NorthernBobwhite_ScaffoldedDeNovo_contig_96682	gi|358485511|ref|NC_006088.3 | GGA1	79.38	422	57	5	1	422	10291399	10291790	7e-102	374	1	S
NorthernBobwhite_ScaffoldedDeNovo_contig_12298	gi|358485511|ref|NC_006088.3 | GGA1	91.69	325	24	3	2	323	10292128	10291804	8e-126	453	1	S
NorthernBobwhite_ScaffoldedDeNovo_contig_12299	gi|358485511|ref|NC_006088.3 | GGA1	81.19	2201	279	24	438	2546	10292137	10294294	0	2116	2	S
NorthernBobwhite_ScaffoldedDeNovo_contig_11092	gi|358485511|ref|NC_006088.3 | GGA1	84.62	39	5	1	311	349	10317736	10317773	0.16	41	23	M
NorthernBobwhite_ScaffoldedDeNovo_contig_198479	gi|358485511|ref|NC_006088.3 | GGA1	70.45	440	62	10	32	404	10336863	10337301	8e-57	224	1399	M
NorthernBobwhite_ScaffoldedDeNovo_contig_42599	gi|358485511|ref|NC_006088.3 | GGA1	81.44	334	62	0	17	350	10337090	10337423	9e-87	324	3846	M
NorthernBobwhite_ScaffoldedDeNovo_contig_70242	gi|358485511|ref|NC_006088.3 | GGA1	82.11	313	53	1	4	316	10337429	10337120	5e-83	311	3663	M
NorthernBobwhite_ScaffoldedDeNovo_contig_3481	gi|358485511|ref|NC_006088.3 | GGA1	67.23	238	64	9	217	452	10352309	10352534	0.0004	50	83	M
NorthernBobwhite_ScaffoldedDeNovo_contig_60116	gi|358485511|ref|NC_006088.3 | GGA1	69.14	256	66	9	3106	3355	10352552	10352304	2e-11	77	13	M
NorthernBobwhite_ScaffoldedDeNovo_contig_179155	gi|358485511|ref|NC_006088.3 | GGA1	85.52	373	50	2	11	379	10384094	10383722	7e-117	425	2	S
NorthernBobwhite_ScaffoldedDeNovo_contig_75277	gi|358485511|ref|NC_006088.3 | GGA1	68.18	176	50	6	142	316	10396798	10396628	0.11	44.6	5	M
NorthernBobwhite_ScaffoldedDeNovo_contig_34510	gi|358485511|ref|NC_006088.3 | GGA1	78.1	315	53	5	277	576	10418233	10418546	3e-64	250	2279	M
NorthernBobwhite_ScaffoldedDeNovo_contig_172845	gi|358485511|ref|NC_006088.3 | GGA1	82.51	446	55	6	359	782	10429898	10430342	3e-123	446	2	S
NorthernBobwhite_ScaffoldedDeNovo_contig_161383	gi|358485511|ref|NC_006088.3 | GGA1	86.77	703	75	3	1	687	10430766	10431466	0	852	4	S
NorthernBobwhite_ScaffoldedDeNovo_contig_37818	gi|358485511|ref|NC_006088.3 | GGA1	89.52	229	17	4	240	464	10441311	10441086	2e-77	293	2	S
NorthernBobwhite_ScaffoldedDeNovo_contig_54635	gi|358485511|ref|NC_006088.3 | GGA1	83.54	486	46	8	16	471	10472708	10472227	5e-143	511	1	S
NorthernBobwhite_ScaffoldedDeNovo_contig_212502	gi|358485511|ref|NC_006088.3 | GGA1	87.5	32	4	0	149	180	10476423	10476392	0.25	41	13	M
NorthernBobwhite_ScaffoldedDeNovo_contig_2044	gi|358485511|ref|NC_006088.3 | GGA1	85.38	14551	1490	149	10370	24563	10493058	10478789	0	16550	205669	M
NorthernBobwhite_ScaffoldedDeNovo_contig_24016	gi|358485511|ref|NC_006088.3 | GGA1	84.91	53	7	1	22614	22665	10511769	10511717	0.0008	57.2	28	M
NorthernBobwhite_ScaffoldedDeNovo_contig_8174	gi|358485511|ref|NC_006088.3 | GGA1	84.66	10068	1066	112	13350	23143	10515160	10525023	0	11120	247159	M
NorthernBobwhite_ScaffoldedDeNovo_contig_173425	gi|358485511|ref|NC_006088.3 | GGA1	79.55	44	9	0	331	374	10518147	10518190	0.6	39.2	6	M
NorthernBobwhite_ScaffoldedDeNovo_contig_64818	gi|358485511|ref|NC_006088.3 | GGA1	89.19	37	4	0	1	37	10518181	10518145	0.0005	50	23	M
NorthernBobwhite_ScaffoldedDeNovo_contig_143166	gi|358485511|ref|NC_006088.3 | GGA1	83.08	467	71	4	1	459	10548826	10549292	3e-132	475	972	M
NorthernBobwhite_ScaffoldedDeNovo_contig_135804	gi|358485511|ref|NC_006088.3 | GGA1	80.7	57	11	0	801	857	10569100	10569156	0.0001	53.6	227	M
NorthernBobwhite_ScaffoldedDeNovo_contig_39422	gi|358485511|ref|NC_006088.3 | GGA1	93.33	30	0	2	288	317	10579955	10579928	0.6	39.2	14	M
NorthernBobwhite_ScaffoldedDeNovo_contig_21656	gi|358485511|ref|NC_006088.3 | GGA1	72.5	1069	244	9	2512	3534	10705793	10706857	7e-171	607	21014	M
NorthernBobwhite_ScaffoldedDeNovo_contig_204643	gi|358485511|ref|NC_006088.3 | GGA1	90.91	33	3	0	317	349	10722986	10722954	0.005	46.4	48	M
NorthernBobwhite_ScaffoldedDeNovo_contig_45614	gi|358485511|ref|NC_006088.3 | GGA1	75.66	645	101	10	77	708	10727895	10728496	1e-127	461	1	S
NorthernBobwhite_ScaffoldedDeNovo_contig_69136	gi|358485511|ref|NC_006088.3 | GGA1	70.45	467	65	44	566	1022	10730228	10730631	1e-14	87.8	241	M
NorthernBobwhite_ScaffoldedDeNovo_contig_96763	gi|358485511|ref|NC_006088.3 | GGA1	86.27	51	4	2	21	71	10753946	10753993	8e-06	55.4	469	M
NorthernBobwhite_ScaffoldedDeNovo_contig_115775	gi|358485511|ref|NC_006088.3 | GGA1	74.88	211	37	5	89	298	10753998	10753803	8e-30	134	49	M
NorthernBobwhite_ScaffoldedDeNovo_contig_17889	gi|358485511|ref|NC_006088.3 | GGA1	75.29	518	117	4	49	556	10767245	10767761	6e-94	349	7545	M
NorthernBobwhite_ScaffoldedDeNovo_contig_144230	gi|358485511|ref|NC_006088.3 | GGA1	69.92	379	45	7	22	343	10814524	10814158	2e-49	201	2	S
NorthernBobwhite_ScaffoldedDeNovo_contig_18246	gi|358485511|ref|NC_006088.3 | GGA1	82.4	932	123	11	93	1002	10814611	10815523	0	930	4	S
NorthernBobwhite_ScaffoldedDeNovo_contig_63530	gi|358485511|ref|NC_006088.3 | GGA1	74.94	391	68	9	3	366	10828269	10827882	2e-64	250	3512	M
NorthernBobwhite_ScaffoldedDeNovo_contig_112207	gi|358485511|ref|NC_006088.3 | GGA1	80.77	52	8	1	261	312	10830312	10830263	0.009	46.4	27	M
[truncated: 217,188+ more rows]

## Sheet: Taeniopygia guttata 3.2.4
Table S3-B NB1.1 Comparative Genome Aligment to Zebra Finch
Query	Hit/Subject Chromosome	% Identity	Align Length	Mismatches	Gaps	q-start	q-end	hit-start	hit-end	evalue	bitscore	Total hits	Single or Multi Chromosome
NorthernBobwhite_ScaffoldedDeNovo_contig_136515	gi|224381666|ref|NC_011462.1| TGU1	86.84	38	4	1	855	892	13216	13252	0.15	42.8	74	M
NorthernBobwhite_ScaffoldedDeNovo_contig_53392	gi|224381666|ref|NC_011462.1| TGU1	79.59	49	9	1	733	781	20103	20150	0.48	41	11	M
NorthernBobwhite_ScaffoldedDeNovo_contig_209849	gi|224381666|ref|NC_011462.1| TGU1	86.67	30	4	0	122	151	20153	20124	2.1	37.4	3	M
NorthernBobwhite_ScaffoldedDeNovo_contig_110749	gi|224381666|ref|NC_011462.1| TGU1	90.32	31	3	0	208	238	39985	39955	0.049	42	1	S
NorthernBobwhite_ScaffoldedDeNovo_contig_98660	gi|224381666|ref|NC_011462.1| TGU1	81.69	71	9	2	468	534	44168	44238	9e-08	64	8	M
NorthernBobwhite_ScaffoldedDeNovo_contig_25627	gi|224381666|ref|NC_011462.1| TGU1	74.64	1183	219	30	8520	9685	50131	51249	0	719	2984	M
NorthernBobwhite_ScaffoldedDeNovo_contig_117084	gi|224381666|ref|NC_011462.1| TGU1	73.97	365	76	5	78	440	63775	64122	2e-56	224	3	M
NorthernBobwhite_ScaffoldedDeNovo_contig_100342	gi|224381666|ref|NC_011462.1| TGU1	83.78	37	6	0	155	191	64366	64330	0.15	41	30	M
NorthernBobwhite_ScaffoldedDeNovo_contig_22530	gi|224381666|ref|NC_011462.1| TGU1	85.71	42	6	0	296	337	64827	64786	0.0006	50	7	M
NorthernBobwhite_ScaffoldedDeNovo_contig_35507	gi|224381666|ref|NC_011462.1| TGU1	85	40	6	0	806	845	64919	64880	0.013	46	2	S
NorthernBobwhite_ScaffoldedDeNovo_contig_72437	gi|224381666|ref|NC_011462.1| TGU1	86.36	44	3	2	368	408	64932	64975	0.006	46	4	M
NorthernBobwhite_ScaffoldedDeNovo_contig_160468	gi|224381666|ref|NC_011462.1| TGU1	85.38	130	19	0	296	425	65542	65671	7e-34	149	7	M
NorthernBobwhite_ScaffoldedDeNovo_contig_184441	gi|224381666|ref|NC_011462.1| TGU1	92.31	299	21	2	338	635	73238	73535	7e-118	428	4	M
NorthernBobwhite_ScaffoldedDeNovo_contig_25146	gi|224381666|ref|NC_011462.1| TGU1	83.53	255	28	3	1124	1367	76171	75920	1e-69	269	10	M
NorthernBobwhite_ScaffoldedDeNovo_contig_68648	gi|224381666|ref|NC_011462.1| TGU1	70.59	187	44	2	437	623	84333	84158	5e-16	91	4	M
NorthernBobwhite_ScaffoldedDeNovo_contig_201094	gi|224381666|ref|NC_011462.1| TGU1	72.82	195	37	9	1104	1294	92427	92245	1e-14	87	246	M
NorthernBobwhite_ScaffoldedDeNovo_contig_65794	gi|224381666|ref|NC_011462.1| TGU1	92.59	27	2	0	202	228	96099	96073	0.2	41	45	M
NorthernBobwhite_ScaffoldedDeNovo_contig_168724	gi|224381666|ref|NC_011462.1| TGU1	96.55	29	1	0	1633	1661	103863	103835	0.008	48	2	M
NorthernBobwhite_ScaffoldedDeNovo_contig_125287	gi|224381666|ref|NC_011462.1| TGU1	89.19	37	4	0	424	460	107476	107440	0.0005	50	1	S
NorthernBobwhite_ScaffoldedDeNovo_contig_118694	gi|224381666|ref|NC_011462.1| TGU1	74.79	119	18	4	1	110	114428	114313	6e-11	73	3	M
NorthernBobwhite_ScaffoldedDeNovo_contig_211549	gi|224381666|ref|NC_011462.1| TGU1	74.58	118	23	6	351	463	114429	114314	2e-05	57	10	M
NorthernBobwhite_ScaffoldedDeNovo_contig_71193	gi|224381666|ref|NC_011462.1| TGU1	76.6	141	27	2	438	578	116714	116848	9e-19	102	27	M
NorthernBobwhite_ScaffoldedDeNovo_contig_92939	gi|224381666|ref|NC_011462.1| TGU1	82.39	284	46	2	83	363	122038	121756	3e-74	282	8	M
NorthernBobwhite_ScaffoldedDeNovo_contig_135328	gi|224381666|ref|NC_011462.1| TGU1	78.95	95	19	1	483	577	123540	123447	2e-12	78	9	M
NorthernBobwhite_ScaffoldedDeNovo_contig_207749	gi|224381666|ref|NC_011462.1| TGU1	75.71	140	23	7	33	167	128530	128397	8e-13	78	84	M
NorthernBobwhite_ScaffoldedDeNovo_contig_144072	gi|224381666|ref|NC_011462.1| TGU1	94.74	38	1	1	93	129	149893	149856	5e-06	57	5	M
NorthernBobwhite_ScaffoldedDeNovo_contig_179736	gi|224381666|ref|NC_011462.1| TGU1	68.57	140	19	5	2674	2809	150576	150694	7e-05	55	3	S
NorthernBobwhite_ScaffoldedDeNovo_contig_121321	gi|224381666|ref|NC_011462.1| TGU1	75.76	99	20	2	7315	7410	153697	153794	1e-07	66	64	M
NorthernBobwhite_ScaffoldedDeNovo_contig_206963	gi|224381666|ref|NC_011462.1| TGU1	77.14	175	22	8	505	674	153848	153687	8e-24	116	27	M
NorthernBobwhite_ScaffoldedDeNovo_contig_191540	gi|224381666|ref|NC_011462.1| TGU1	75.25	408	65	7	3	386	155799	156194	5e-74	282	3	M
NorthernBobwhite_ScaffoldedDeNovo_contig_66493	gi|224381666|ref|NC_011462.1| TGU1	86.11	36	5	0	46	81	156792	156827	0.044	42	1	S
NorthernBobwhite_ScaffoldedDeNovo_contig_34461	gi|224381666|ref|NC_011462.1| TGU1	81.34	359	59	5	19	371	158834	158478	8e-89	331	6	M
NorthernBobwhite_ScaffoldedDeNovo_contig_217309	gi|224381666|ref|NC_011462.1| TGU1	87.5	40	5	0	321	360	165899	165938	0.0004	50	28	M
NorthernBobwhite_ScaffoldedDeNovo_contig_116512	gi|224381666|ref|NC_011462.1| TGU1	82.89	76	11	2	268	342	171333	171259	1e-10	71	152	M
NorthernBobwhite_ScaffoldedDeNovo_contig_4929	gi|224381666|ref|NC_011462.1| TGU1	74.86	903	164	26	45492	46380	183237	184090	3e-151	545	50075	M
NorthernBobwhite_ScaffoldedDeNovo_contig_121652	gi|224381666|ref|NC_011462.1| TGU1	74.18	182	45	2	228	407	195271	195090	6e-22	109	17	M
NorthernBobwhite_ScaffoldedDeNovo_contig_100968	gi|224381666|ref|NC_011462.1| TGU1	67.54	690	146	20	8	692	195885	196501	1e-53	215	5	M
NorthernBobwhite_ScaffoldedDeNovo_contig_152733	gi|224381666|ref|NC_011462.1| TGU1	70.94	117	28	2	1169	1279	196982	196866	5e-05	55	6	M
NorthernBobwhite_ScaffoldedDeNovo_contig_106396	gi|224381666|ref|NC_011462.1| TGU1	66.91	550	132	30	1406	1937	197087	196570	4e-13	82	11	M
NorthernBobwhite_ScaffoldedDeNovo_contig_186639	gi|224381666|ref|NC_011462.1| TGU1	90.91	33	3	0	2	34	203024	203056	0.006	46	2	S
NorthernBobwhite_ScaffoldedDeNovo_contig_44670	gi|224381666|ref|NC_011462.1| TGU1	81.28	406	53	7	2855	3246	205231	205627	4e-102	379	5208	M
NorthernBobwhite_ScaffoldedDeNovo_contig_158629	gi|224381666|ref|NC_011462.1| TGU1	96.3	27	1	0	1	27	212216	212190	0.018	44	1	S
NorthernBobwhite_ScaffoldedDeNovo_contig_4628	gi|224381666|ref|NC_011462.1| TGU1	76.65	1255	208	26	21854	23072	229344	230549	0	902	14404	M
NorthernBobwhite_ScaffoldedDeNovo_contig_207372	gi|224381666|ref|NC_011462.1| TGU1	93.55	31	2	0	84	114	230635	230665	0.001	48	6	M
NorthernBobwhite_ScaffoldedDeNovo_contig_44104	gi|224381666|ref|NC_011462.1| TGU1	86.15	65	5	1	330	390	258911	258975	4e-12	77	2	M
NorthernBobwhite_ScaffoldedDeNovo_contig_83115	gi|224381666|ref|NC_011462.1| TGU1	88.89	36	4	0	1	36	258936	258901	0.001	48	11	M
NorthernBobwhite_ScaffoldedDeNovo_contig_50816	gi|224381666|ref|NC_011462.1| TGU1	96.67	30	1	0	547	576	281770	281741	0.001	50	7	M
NorthernBobwhite_ScaffoldedDeNovo_contig_132285	gi|224381666|ref|NC_011462.1| TGU1	67.26	226	62	3	615	834	290470	290689	2e-09	71	23	M
NorthernBobwhite_ScaffoldedDeNovo_contig_82124	gi|224381666|ref|NC_011462.1| TGU1	71.08	204	35	12	1475	1669	290583	290771	3e-09	69	1	S
NorthernBobwhite_ScaffoldedDeNovo_contig_177847	gi|224381666|ref|NC_011462.1| TGU1	84.21	38	6	0	75	112	292761	292798	0.08	42	1	S
NorthernBobwhite_ScaffoldedDeNovo_contig_115625	gi|224381666|ref|NC_011462.1| TGU1	69.19	198	57	4	558	753	297558	297753	3e-09	68	24	M
NorthernBobwhite_ScaffoldedDeNovo_contig_7605	gi|224381666|ref|NC_011462.1| TGU1	80.08	708	102	11	23985	24670	304500	305190	7e-176	627	23974	M
NorthernBobwhite_ScaffoldedDeNovo_contig_68758	gi|224381666|ref|NC_011462.1| TGU1	76.8	194	38	4	75	266	312616	312428	3e-30	136	4	M
NorthernBobwhite_ScaffoldedDeNovo_contig_42548	gi|224381666|ref|NC_011462.1| TGU1	86.11	36	5	0	94	129	365821	365786	0.067	42	1	S
NorthernBobwhite_ScaffoldedDeNovo_contig_36515	gi|224381666|ref|NC_011462.1| TGU1	80.37	484	62	8	12681	13161	368713	368260	2e-119	439	33411	M
NorthernBobwhite_ScaffoldedDeNovo_contig_126083	gi|224381666|ref|NC_011462.1| TGU1	76.1	205	40	4	209	406	371883	371681	4e-31	140	7	M
NorthernBobwhite_ScaffoldedDeNovo_contig_37384	gi|224381666|ref|NC_011462.1| TGU1	85.71	42	5	1	182	223	391885	391925	0.011	46	2	M
NorthernBobwhite_ScaffoldedDeNovo_contig_179008	gi|224381666|ref|NC_011462.1| TGU1	77.27	66	12	2	340	405	425370	425308	0.005	46	14	M
NorthernBobwhite_ScaffoldedDeNovo_contig_137828	gi|224381666|ref|NC_011462.1| TGU1	96.43	28	1	0	1111	1138	425727	425754	0.017	46	1	S
NorthernBobwhite_ScaffoldedDeNovo_contig_5913	gi|224381666|ref|NC_011462.1| TGU1	71.68	957	163	20	2868	3814	426629	427487	1e-141	511	18958	M
NorthernBobwhite_ScaffoldedDeNovo_contig_162263	gi|224381666|ref|NC_011462.1| TGU1	89.58	48	5	0	257	304	431176	431223	1e-08	64	145	M
NorthernBobwhite_ScaffoldedDeNovo_contig_19037	gi|224381666|ref|NC_011462.1| TGU1	67.65	442	99	13	5139	5542	435206	434771	2e-28	134	32	M
NorthernBobwhite_ScaffoldedDeNovo_contig_74913	gi|224381666|ref|NC_011462.1| TGU1	76.92	65	14	1	56	119	453061	453125	0.004	46	3	M
NorthernBobwhite_ScaffoldedDeNovo_contig_209572	gi|224381666|ref|NC_011462.1| TGU1	78.46	65	13	1	233	296	453125	453061	0.0001	51	2	M
NorthernBobwhite_ScaffoldedDeNovo_contig_103432	gi|224381666|ref|NC_011462.1| TGU1	73.63	91	22	2	234	323	453840	453751	0.0003	50	46	M
NorthernBobwhite_ScaffoldedDeNovo_contig_11706	gi|224381666|ref|NC_011462.1| TGU1	74.95	1593	288	27	28462	30007	464696	466224	0	1052	40906	M
NorthernBobwhite_ScaffoldedDeNovo_contig_145202	gi|224381666|ref|NC_011462.1| TGU1	100	22	0	0	77	98	477932	477953	0.24	41	30	M
NorthernBobwhite_ScaffoldedDeNovo_contig_95549	gi|224381666|ref|NC_011462.1| TGU1	82.28	79	11	3	101	177	508096	508019	6e-10	69	191	M
NorthernBobwhite_ScaffoldedDeNovo_contig_47500	gi|224381666|ref|NC_011462.1| TGU1	91.18	34	2	1	52	84	523499	523532	0.016	44	1	S
NorthernBobwhite_ScaffoldedDeNovo_contig_10579	gi|224381666|ref|NC_011462.1| TGU1	78.41	1811	308	28	48112	49888	533042	531281	0	1452	19699	M
NorthernBobwhite_ScaffoldedDeNovo_contig_26081	gi|224381666|ref|NC_011462.1| TGU1	81.73	646	89	10	66	709	534853	534235	2e-173	614	6	M
NorthernBobwhite_ScaffoldedDeNovo_contig_108098	gi|224381666|ref|NC_011462.1| TGU1	88.24	34	4	0	335	368	544335	544302	0.016	44	2	M
NorthernBobwhite_ScaffoldedDeNovo_contig_51936	gi|224381666|ref|NC_011462.1| TGU1	90.38	52	5	0	966	1017	546649	546598	1e-09	71	521	M
NorthernBobwhite_ScaffoldedDeNovo_contig_7069	gi|224381666|ref|NC_011462.1| TGU1	78.12	64	10	2	272	332	565656	565594	0.001	48	7	M
NorthernBobwhite_ScaffoldedDeNovo_contig_39514	gi|224381666|ref|NC_011462.1| TGU1	75	84	14	3	80	160	581750	581829	0.0006	50	42	M
NorthernBobwhite_ScaffoldedDeNovo_contig_63947	gi|224381666|ref|NC_011462.1| TGU1	82.43	643	82	8	12523	13152	585935	585311	0	643	23223	M
NorthernBobwhite_ScaffoldedDeNovo_contig_207190	gi|224381666|ref|NC_011462.1| TGU1	84.44	45	5	1	184	228	594179	594137	0.001	48	5	M
NorthernBobwhite_ScaffoldedDeNovo_contig_43519	gi|224381666|ref|NC_011462.1| TGU1	76.44	781	138	12	1156	1908	597368	598130	7e-159	567	18642	M
NorthernBobwhite_ScaffoldedDeNovo_contig_45669	gi|224381666|ref|NC_011462.1| TGU1	79.75	400	71	7	965	1358	603415	603810	2e-88	334	6272	M
NorthernBobwhite_ScaffoldedDeNovo_contig_218303	gi|224381666|ref|NC_011462.1| TGU1	93.33	30	2	0	85	114	604027	604056	0.004	46	12	M
NorthernBobwhite_ScaffoldedDeNovo_contig_131184	gi|224381666|ref|NC_011462.1| TGU1	89.19	37	3	1	598	633	605796	605832	0.009	46	4	M
NorthernBobwhite_ScaffoldedDeNovo_contig_49322	gi|224381666|ref|NC_011462.1| TGU1	77.03	74	13	3	90	162	605871	605801	0.001	48	1	S
NorthernBobwhite_ScaffoldedDeNovo_contig_144628	gi|224381666|ref|NC_011462.1| TGU1	78.95	57	11	1	298	353	616037	616093	0.011	46	3	M
NorthernBobwhite_ScaffoldedDeNovo_contig_90384	gi|224381666|ref|NC_011462.1| TGU1	76.62	77	16	2	288	363	616082	616007	0.0001	51	1	S
NorthernBobwhite_ScaffoldedDeNovo_contig_204093	gi|224381666|ref|NC_011462.1| TGU1	85.37	41	5	1	275	314	616400	616360	0.013	44	3	M
NorthernBobwhite_ScaffoldedDeNovo_contig_62	gi|224381666|ref|NC_011462.1| TGU1	77.97	1239	218	18	1843	3075	625091	626280	0	973	6093	M
NorthernBobwhite_ScaffoldedDeNovo_contig_55105	gi|224381666|ref|NC_011462.1| TGU1	88.37	43	4	1	11	52	640601	640643	0.0001	51	211	M
NorthernBobwhite_ScaffoldedDeNovo_contig_202652	gi|224381666|ref|NC_011462.1| TGU1	88.89	36	4	0	60	95	647122	647087	0.001	48	9	M
NorthernBobwhite_ScaffoldedDeNovo_contig_63183	gi|224381666|ref|NC_011462.1| TGU1	82.97	464	76	1	5308	5771	650283	650743	8e-132	479	11117	M
NorthernBobwhite_ScaffoldedDeNovo_contig_111501	gi|224381666|ref|NC_011462.1| TGU1	90.91	33	3	0	80	112	657081	657113	0.005	46	9	M
NorthernBobwhite_ScaffoldedDeNovo_contig_34356	gi|224381666|ref|NC_011462.1| TGU1	82.35	51	6	2	14	63	660754	660706	0.008	46	1	S
NorthernBobwhite_ScaffoldedDeNovo_contig_142638	gi|224381666|ref|NC_011462.1| TGU1	90.91	33	2	1	240	271	679507	679539	0.12	42.8	44	M
NorthernBobwhite_ScaffoldedDeNovo_contig_16756	gi|224381666|ref|NC_011462.1| TGU1	75.85	1640	366	9	2345	3982	692907	691296	0	1159	13249	M
NorthernBobwhite_ScaffoldedDeNovo_contig_119282	gi|224381666|ref|NC_011462.1| TGU1	74.67	75	17	1	57	131	695083	695155	0.001	48	1	S
NorthernBobwhite_ScaffoldedDeNovo_contig_17232	gi|224381666|ref|NC_011462.1| TGU1	81.4	258	40	4	14060	14317	698894	698645	2e-59	239	11685	M
NorthernBobwhite_ScaffoldedDeNovo_contig_89795	gi|224381666|ref|NC_011462.1| TGU1	86.36	44	6	0	350	393	699094	699137	3e-05	53	4	M
NorthernBobwhite_ScaffoldedDeNovo_contig_89796	gi|224381666|ref|NC_011462.1| TGU1	88.1	42	5	0	328	369	699096	699137	3e-05	53	3	M
NorthernBobwhite_ScaffoldedDeNovo_contig_89844	gi|224381666|ref|NC_011462.1| TGU1	77.63	76	12	3	404	477	699627	699555	0.0003	51	5	M
NorthernBobwhite_ScaffoldedDeNovo_contig_17233	gi|224381666|ref|NC_011462.1| TGU1	87.5	168	21	0	6537	6704	728644	728811	1e-50	208	13	M
NorthernBobwhite_ScaffoldedDeNovo_contig_64202	gi|224381666|ref|NC_011462.1| TGU1	72.04	583	101	15	4837	5417	729401	728879	5e-80	306	14144	M
NorthernBobwhite_ScaffoldedDeNovo_contig_141150	gi|224381666|ref|NC_011462.1| TGU1	92.59	27	2	0	309	335	730062	730036	0.3	41	7	M
NorthernBobwhite_ScaffoldedDeNovo_contig_17397	gi|224381666|ref|NC_011462.1| TGU1	75.9	921	204	7	21758	22661	735846	734927	0	645	57	M
NorthernBobwhite_ScaffoldedDeNovo_contig_199665	gi|224381666|ref|NC_011462.1| TGU1	90.62	32	3	0	273	304	739502	739533	0.019	44	5	M
NorthernBobwhite_ScaffoldedDeNovo_contig_187749	gi|224381666|ref|NC_011462.1| TGU1	90.62	64	5	1	216	279	740677	740739	4e-15	86	2083	M
NorthernBobwhite_ScaffoldedDeNovo_contig_97202	gi|224381666|ref|NC_011462.1| TGU1	88.24	34	3	1	235	267	752064	752031	0.2	41	87	M
NorthernBobwhite_ScaffoldedDeNovo_contig_155814	gi|224381666|ref|NC_011462.1| TGU1	85	60	8	1	595	653	764419	764478	3e-08	64	3240	M
NorthernBobwhite_ScaffoldedDeNovo_contig_19185	gi|224381666|ref|NC_011462.1| TGU1	84.13	832	93	8	4255	5068	766399	765589	0	904	11	M
NorthernBobwhite_ScaffoldedDeNovo_contig_212147	gi|224381666|ref|NC_011462.1| TGU1	73.39	218	42	8	12	222	767330	767122	1e-22	111	5	M
NorthernBobwhite_ScaffoldedDeNovo_contig_4659	gi|224381666|ref|NC_011462.1| TGU1	78.31	936	185	9	11083	12014	770643	769722	0	749	9137	M
NorthernBobwhite_ScaffoldedDeNovo_contig_52539	gi|224381666|ref|NC_011462.1| TGU1	92.86	28	2	0	182	209	777240	777267	0.05	42	2	S
NorthernBobwhite_ScaffoldedDeNovo_contig_101986	gi|224381666|ref|NC_011462.1| TGU1	80.82	245	38	2	291	526	786796	786552	3e-58	230	6	M
NorthernBobwhite_ScaffoldedDeNovo_contig_65208	gi|224381666|ref|NC_011462.1| TGU1	81.54	390	59	4	331	708	789425	789813	5e-101	372	3	M
NorthernBobwhite_ScaffoldedDeNovo_contig_152941	gi|224381666|ref|NC_011462.1| TGU1	84.38	128	19	1	113	239	790290	790417	2e-30	138	11	M
NorthernBobwhite_ScaffoldedDeNovo_contig_69487	gi|224381666|ref|NC_011462.1| TGU1	79.1	134	24	2	1	130	791369	791236	2e-22	111	1	S
NorthernBobwhite_ScaffoldedDeNovo_contig_127703	gi|224381666|ref|NC_011462.1| TGU1	75.23	222	29	3	243	439	794946	794726	6e-38	163	2	S
NorthernBobwhite_ScaffoldedDeNovo_contig_50281	gi|224381666|ref|NC_011462.1| TGU1	84.06	69	11	0	3	71	800970	800902	2e-11	75	522	M
NorthernBobwhite_ScaffoldedDeNovo_contig_57680	gi|224381666|ref|NC_011462.1| TGU1	81.25	48	9	0	58	105	801211	801258	0.004	46	3	M
NorthernBobwhite_ScaffoldedDeNovo_contig_12177	gi|224381666|ref|NC_011462.1| TGU1	70.58	1142	254	22	1883	3010	811405	812478	7e-145	520	5724	M
NorthernBobwhite_ScaffoldedDeNovo_contig_139315	gi|224381666|ref|NC_011462.1| TGU1	77.36	296	62	2	13	308	813904	813614	2e-57	228	5	M
NorthernBobwhite_ScaffoldedDeNovo_contig_170437	gi|224381666|ref|NC_011462.1| TGU1	74.3	755	124	11	1	697	813966	814708	1e-139	500	2	S
NorthernBobwhite_ScaffoldedDeNovo_contig_151700	gi|224381666|ref|NC_011462.1| TGU1	73.08	312	66	8	94	401	820541	820244	1e-38	165	1	S
NorthernBobwhite_ScaffoldedDeNovo_contig_43329	gi|224381666|ref|NC_011462.1| TGU1	73.72	312	64	9	94	401	820541	820244	9e-40	168	2	M
NorthernBobwhite_ScaffoldedDeNovo_contig_146235	gi|224381666|ref|NC_011462.1| TGU1	81.36	59	6	3	236	294	830597	830650	0.001	48	1	S
NorthernBobwhite_ScaffoldedDeNovo_contig_171550	gi|224381666|ref|NC_011462.1| TGU1	74.63	67	12	2	135	200	888740	888802	0.2	41	64	M
NorthernBobwhite_ScaffoldedDeNovo_contig_19958	gi|224381666|ref|NC_011462.1| TGU1	81.48	54	10	0	3453	3506	897249	897302	0.0003	53	5	M
NorthernBobwhite_ScaffoldedDeNovo_contig_91976	gi|224381666|ref|NC_011462.1| TGU1	88.24	34	4	0	281	314	897250	897283	0.013	44	5	M
NorthernBobwhite_ScaffoldedDeNovo_contig_198347	gi|224381666|ref|NC_011462.1| TGU1	91.43	35	3	0	1	35	897264	897298	0.0004	50	18	M
NorthernBobwhite_ScaffoldedDeNovo_contig_82481	gi|224381666|ref|NC_011462.1| TGU1	77.61	67	10	2	186	251	898542	898480	0.0004	50	1	S
NorthernBobwhite_ScaffoldedDeNovo_contig_132740	gi|224381666|ref|NC_011462.1| TGU1	92.86	28	2	0	246	273	903533	903560	0.048	42	2	S
NorthernBobwhite_ScaffoldedDeNovo_contig_18683	gi|224381666|ref|NC_011462.1| TGU1	69.92	133	25	5	103	223	909253	909382	0.0001	51	12	M
NorthernBobwhite_ScaffoldedDeNovo_contig_145720	gi|224381666|ref|NC_011462.1| TGU1	70	140	27	5	261	393	909506	909375	2e-05	55	17	M
NorthernBobwhite_ScaffoldedDeNovo_contig_85247	gi|224381666|ref|NC_011462.1| TGU1	77.78	72	13	3	210	280	909516	909447	0.001	48	4	M
NorthernBobwhite_ScaffoldedDeNovo_contig_138292	gi|224381666|ref|NC_011462.1| TGU1	65.61	378	89	11	1944	2302	909585	909230	1e-13	84	146	M
NorthernBobwhite_ScaffoldedDeNovo_contig_208184	gi|224381666|ref|NC_011462.1| TGU1	69.33	238	49	8	62	278	909656	909422	7e-15	86	27	M
NorthernBobwhite_ScaffoldedDeNovo_contig_35198	gi|224381666|ref|NC_011462.1| TGU1	90.21	235	23	0	2540	2774	911752	911518	1e-84	320	4	M
NorthernBobwhite_ScaffoldedDeNovo_contig_26161	gi|224381666|ref|NC_011462.1| TGU1	92.31	26	2	0	192	217	915778	915803	0.51	39.2	11	M
NorthernBobwhite_ScaffoldedDeNovo_contig_93658	gi|224381666|ref|NC_011462.1| TGU1	68.98	216	59	2	107	314	918221	918006	5e-15	86	14	M
NorthernBobwhite_ScaffoldedDeNovo_contig_75487	gi|224381666|ref|NC_011462.1| TGU1	74.05	158	31	5	78	235	918293	918440	1e-15	87	6	M
NorthernBobwhite_ScaffoldedDeNovo_contig_202018	gi|224381666|ref|NC_011462.1| TGU1	66.56	320	73	14	14	323	918301	918596	6e-08	62	3	M
NorthernBobwhite_ScaffoldedDeNovo_contig_24218	gi|224381666|ref|NC_011462.1| TGU1	67.55	567	101	40	188	753	918505	918021	4e-15	87	4	M
NorthernBobwhite_ScaffoldedDeNovo_contig_60610	gi|224381666|ref|NC_011462.1| TGU1	87.88	33	4	0	219	251	919199	919167	0.046	42	1	S
NorthernBobwhite_ScaffoldedDeNovo_contig_133850	gi|224381666|ref|NC_011462.1| TGU1	79.44	107	18	3	8	112	929892	929996	3e-14	84	6	M
NorthernBobwhite_ScaffoldedDeNovo_contig_93997	gi|224381666|ref|NC_011462.1| TGU1	83.59	128	21	0	380	507	934611	934738	5e-30	136	5	M
NorthernBobwhite_ScaffoldedDeNovo_contig_40155	gi|224381666|ref|NC_011462.1| TGU1	87.93	58	6	1	585	641	954851	954908	7e-10	69	1338	M
NorthernBobwhite_ScaffoldedDeNovo_contig_10234	gi|224381666|ref|NC_011462.1| TGU1	76.15	629	118	9	3142	3761	957034	956429	2e-122	446	7865	M
NorthernBobwhite_ScaffoldedDeNovo_contig_75582	gi|224381666|ref|NC_011462.1| TGU1	80	110	20	2	176	284	988462	988570	3e-17	93	13	M
NorthernBobwhite_ScaffoldedDeNovo_contig_75581	gi|224381666|ref|NC_011462.1| TGU1	80	110	20	2	186	294	988462	988570	3e-17	93	14	M
NorthernBobwhite_ScaffoldedDeNovo_contig_147389	gi|224381666|ref|NC_011462.1| TGU1	67.81	320	58	8	114	420	993148	993435	3e-24	118	6	M
NorthernBobwhite_ScaffoldedDeNovo_contig_102934	gi|224381666|ref|NC_011462.1| TGU1	71.67	360	54	11	474	832	996206	995894	6e-44	183	2	M
NorthernBobwhite_ScaffoldedDeNovo_contig_198657	gi|224381666|ref|NC_011462.1| TGU1	93.33	30	2	0	115	144	1006464	1006493	0.006	46	5	M
NorthernBobwhite_ScaffoldedDeNovo_contig_9337	gi|224381666|ref|NC_011462.1| TGU1	71.12	2216	441	42	12955	15116	1011793	1013863	0	1101	15012	M
NorthernBobwhite_ScaffoldedDeNovo_contig_102044	gi|224381666|ref|NC_011462.1| TGU1	79.35	310	40	5	530	832	1021469	1021177	5e-70	269	15	M
NorthernBobwhite_ScaffoldedDeNovo_contig_152456	gi|224381666|ref|NC_011462.1| TGU1	86.05	43	5	1	953	994	1023210	1023252	0.004	48	14	M
NorthernBobwhite_ScaffoldedDeNovo_contig_72954	gi|224381666|ref|NC_011462.1| TGU1	71.88	160	37	3	287	446	1042883	1042732	3e-13	80	5	M
NorthernBobwhite_ScaffoldedDeNovo_contig_135935	gi|224381666|ref|NC_011462.1| TGU1	68.94	235	65	8	3162	3389	1044652	1044419	5e-08	66	57	M
NorthernBobwhite_ScaffoldedDeNovo_contig_56097	gi|224381666|ref|NC_011462.1| TGU1	73.19	138	28	2	4417	4550	1057107	1056975	2e-12	82	106	M
NorthernBobwhite_ScaffoldedDeNovo_contig_63770	gi|224381666|ref|NC_011462.1| TGU1	67.67	365	85	11	498	837	1068243	1067887	9e-21	107	9	M
NorthernBobwhite_ScaffoldedDeNovo_contig_118512	gi|224381666|ref|NC_011462.1| TGU1	83.47	121	20	0	516	636	1081762	1081882	2e-27	129	4	M
NorthernBobwhite_ScaffoldedDeNovo_contig_18634	gi|224381666|ref|NC_011462.1| TGU1	79.59	49	10	0	246	294	1087226	1087178	0.016	44	2	M
NorthernBobwhite_ScaffoldedDeNovo_contig_182283	gi|224381666|ref|NC_011462.1| TGU1	84.29	70	11	0	399	468	1091988	1092057	5e-12	77	58	M
NorthernBobwhite_ScaffoldedDeNovo_contig_159840	gi|224381666|ref|NC_011462.1| TGU1	77.19	57	13	0	213	269	1092003	1092059	0.017	44	2	S
NorthernBobwhite_ScaffoldedDeNovo_contig_17329	gi|224381666|ref|NC_011462.1| TGU1	79.4	403	71	6	22755	23154	1105373	1104980	3e-88	336	22057	M
NorthernBobwhite_ScaffoldedDeNovo_contig_21066	gi|224381666|ref|NC_011462.1| TGU1	74.77	218	50	3	1	217	1114399	1114186	6e-30	136	81	M
NorthernBobwhite_ScaffoldedDeNovo_contig_143433	gi|224381666|ref|NC_011462.1| TGU1	85	60	8	1	86	144	1126087	1126146	2e-08	64	3211	M
NorthernBobwhite_ScaffoldedDeNovo_contig_143432	gi|224381666|ref|NC_011462.1| TGU1	85	60	8	1	86	144	1126087	1126146	2e-08	64	3210	M
NorthernBobwhite_ScaffoldedDeNovo_contig_38895	gi|224381666|ref|NC_011462.1| TGU1	74.16	832	162	16	3459	4280	1130613	1131401	4e-140	508	8316	M
NorthernBobwhite_ScaffoldedDeNovo_contig_168973	gi|224381666|ref|NC_011462.1| TGU1	100	23	0	0	242	264	1135447	1135425	0.092	42	1	S
NorthernBobwhite_ScaffoldedDeNovo_contig_177689	gi|224381666|ref|NC_011462.1| TGU1	80.72	223	27	5	96	317	1138935	1138728	1e-49	201	4	M
NorthernBobwhite_ScaffoldedDeNovo_contig_55561	gi|224381666|ref|NC_011462.1| TGU1	93.1	29	2	0	350	378	1139652	1139680	0.027	44	1	S
NorthernBobwhite_ScaffoldedDeNovo_contig_38720	gi|224381666|ref|NC_011462.1| TGU1	76.67	630	104	9	11960	12548	1168470	1169097	3e-129	471	421	M
NorthernBobwhite_ScaffoldedDeNovo_contig_191670	gi|224381666|ref|NC_011462.1| TGU1	81.13	53	8	2	179	230	1173031	1172980	0.025	44	2	M
NorthernBobwhite_ScaffoldedDeNovo_contig_77492	gi|224381666|ref|NC_011462.1| TGU1	81.03	58	9	2	179	235	1173031	1172975	0.002	48	4	M
NorthernBobwhite_ScaffoldedDeNovo_contig_64404	gi|224381666|ref|NC_011462.1| TGU1	88.57	35	1	1	1044	1078	1191923	1191954	0.081	44	3	S
NorthernBobwhite_ScaffoldedDeNovo_contig_29129	gi|224381666|ref|NC_011462.1| TGU1	100	25	0	0	856	880	1197068	1197044	0.013	46	7	M
NorthernBobwhite_ScaffoldedDeNovo_contig_94565	gi|224381666|ref|NC_011462.1| TGU1	80	50	6	1	174	219	1197307	1197258	0.013	44	2	M
NorthernBobwhite_ScaffoldedDeNovo_contig_70650	gi|224381666|ref|NC_011462.1| TGU1	85.66	286	41	0	21	306	1203852	1204137	7e-89	331	12	M
NorthernBobwhite_ScaffoldedDeNovo_contig_85663	gi|224381666|ref|NC_011462.1| TGU1	89.07	183	20	0	26	208	1205903	1205721	2e-61	241	6	M
NorthernBobwhite_ScaffoldedDeNovo_contig_135513	gi|224381666|ref|NC_011462.1| TGU1	72.27	220	55	4	1	217	1206149	1206365	4e-22	109	1	S
NorthernBobwhite_ScaffoldedDeNovo_contig_154097	gi|224381666|ref|NC_011462.1| TGU1	88.49	252	29	0	1	252	1206347	1206096	2e-85	324	3	M
NorthernBobwhite_ScaffoldedDeNovo_contig_7961	gi|224381666|ref|NC_011462.1| TGU1	97.8	409	7	1	22583	22989	1208557	1208965	0	695	1157	M
NorthernBobwhite_ScaffoldedDeNovo_contig_176360	gi|224381666|ref|NC_011462.1| TGU1	100	24	0	0	207	230	1216316	1216293	0.012	44	7	M
NorthernBobwhite_ScaffoldedDeNovo_contig_80443	gi|224381666|ref|NC_011462.1| TGU1	90.32	31	3	0	510	540	1224599	1224569	0.085	42	1	S
NorthernBobwhite_ScaffoldedDeNovo_contig_62749	gi|224381666|ref|NC_011462.1| TGU1	78.57	56	11	1	132	187	1231600	1231546	0.015	44	2	M
NorthernBobwhite_ScaffoldedDeNovo_contig_173287	gi|224381666|ref|NC_011462.1| TGU1	86	50	3	2	259	307	1237107	1237061	3e-05	53	8	M
NorthernBobwhite_ScaffoldedDeNovo_contig_216096	gi|224381666|ref|NC_011462.1| TGU1	84	50	4	2	252	300	1237107	1237061	0.0003	50	7	M
NorthernBobwhite_ScaffoldedDeNovo_contig_67931	gi|224381666|ref|NC_011462.1| TGU1	96.97	33	0	1	9075	9107	1240113	1240144	0.003	51	1	S
NorthernBobwhite_ScaffoldedDeNovo_contig_10609	gi|224381666|ref|NC_011462.1| TGU1	78.19	3278	475	42	72218	75390	1270789	1273931	0	2715	48578	M
NorthernBobwhite_ScaffoldedDeNovo_contig_144407	gi|224381666|ref|NC_011462.1| TGU1	74.7	83	19	2	311	392	1277138	1277057	0.002	48	2	M
NorthernBobwhite_ScaffoldedDeNovo_contig_132300	gi|224381666|ref|NC_011462.1| TGU1	80.85	47	9	0	364	410	1280376	1280330	0.021	44	2	M
NorthernBobwhite_ScaffoldedDeNovo_contig_202170	gi|224381666|ref|NC_011462.1| TGU1	83.02	53	9	0	135	187	1282606	1282658	7e-06	55	2	M
NorthernBobwhite_ScaffoldedDeNovo_contig_175221	gi|224381666|ref|NC_011462.1| TGU1	83.02	53	9	0	118	170	1282658	1282606	7e-06	55	1	S
NorthernBobwhite_ScaffoldedDeNovo_contig_31829	gi|224381666|ref|NC_011462.1| TGU1	73.6	625	111	12	6263	6878	1284571	1283992	1e-101	378	117	M
NorthernBobwhite_ScaffoldedDeNovo_contig_81908	gi|224381666|ref|NC_011462.1| TGU1	68.89	389	91	9	9	376	1297996	1297617	4e-32	143	2	M
NorthernBobwhite_ScaffoldedDeNovo_contig_19879	gi|224381666|ref|NC_011462.1| TGU1	70.91	1038	232	27	12445	13435	1307557	1306543	1e-123	452	30	M
NorthernBobwhite_ScaffoldedDeNovo_contig_73275	gi|224381666|ref|NC_011462.1| TGU1	95.45	22	1	0	249	270	1309911	1309932	8	35.6	1	S
NorthernBobwhite_ScaffoldedDeNovo_contig_133204	gi|224381666|ref|NC_011462.1| TGU1	66.57	682	155	20	4	654	1316327	1316966	2e-42	178	1	S
NorthernBobwhite_ScaffoldedDeNovo_contig_161109	gi|224381666|ref|NC_011462.1| TGU1	67.45	682	146	28	128	775	1316966	1316327	1e-40	172	2	M
NorthernBobwhite_ScaffoldedDeNovo_contig_79860	gi|224381666|ref|NC_011462.1| TGU1	83.33	54	6	2	15	68	1319071	1319121	0.0003	51	5	M
NorthernBobwhite_ScaffoldedDeNovo_contig_90670	gi|224381666|ref|NC_011462.1| TGU1	92.59	27	2	0	314	340	1331086	1331112	0.46	41	23	M
NorthernBobwhite_ScaffoldedDeNovo_contig_11882	gi|224381666|ref|NC_011462.1| TGU1	80.87	732	112	11	9411	10127	1335871	1335153	0	664	577	M
NorthernBobwhite_ScaffoldedDeNovo_contig_16436	gi|224381666|ref|NC_011462.1| TGU1	78.52	135	23	2	2129	2257	1349854	1349988	3e-21	109	318	M
NorthernBobwhite_ScaffoldedDeNovo_contig_207658	gi|224381666|ref|NC_011462.1| TGU1	77.78	99	18	2	220	314	1349946	1349848	2e-11	75	44	M
NorthernBobwhite_ScaffoldedDeNovo_contig_210136	gi|224381666|ref|NC_011462.1| TGU1	76.53	98	23	0	482	579	1349972	1349875	5e-11	73	15	M
NorthernBobwhite_ScaffoldedDeNovo_contig_86459	gi|224381666|ref|NC_011462.1| TGU1	78.9	109	20	2	3358	3466	1349993	1349888	3e-14	87	172	M
NorthernBobwhite_ScaffoldedDeNovo_contig_152673	gi|224381666|ref|NC_011462.1| TGU1	70.1	311	61	9	132	420	1350781	1351081	2e-28	131	4	M
NorthernBobwhite_ScaffoldedDeNovo_contig_186769	gi|224381666|ref|NC_011462.1| TGU1	69.35	310	66	8	5	294	1351081	1350781	8e-26	122	2	M
NorthernBobwhite_ScaffoldedDeNovo_contig_41697	gi|224381666|ref|NC_011462.1| TGU1	82.46	57	7	1	1	54	1354787	1354843	3e-06	57	30	M
NorthernBobwhite_ScaffoldedDeNovo_contig_169336	gi|224381666|ref|NC_011462.1| TGU1	73.4	94	17	2	276	365	1357459	1357548	9e-06	55	35	M
NorthernBobwhite_ScaffoldedDeNovo_contig_183905	gi|224381666|ref|NC_011462.1| TGU1	88.57	35	3	1	53	87	1359925	1359892	0.85	42.8	5	M
NorthernBobwhite_ScaffoldedDeNovo_contig_160594	gi|224381666|ref|NC_011462.1| TGU1	90	30	3	0	77	106	1363975	1364004	0.16	41	59	M
NorthernBobwhite_ScaffoldedDeNovo_contig_211577	gi|224381666|ref|NC_011462.1| TGU1	90.32	31	3	0	225	255	1368235	1368265	0.061	42	1	S
NorthernBobwhite_ScaffoldedDeNovo_contig_1406	gi|224381666|ref|NC_011462.1| TGU1	67.68	263	80	3	3505	3764	1389204	1388944	5e-12	82	16	M
NorthernBobwhite_ScaffoldedDeNovo_contig_96356	gi|224381666|ref|NC_011462.1| TGU1	67.65	272	78	8	878	1145	1389305	1389040	7e-09	68	10	M
NorthernBobwhite_ScaffoldedDeNovo_contig_14688	gi|224381666|ref|NC_011462.1| TGU1	75.28	1177	232	21	36453	37590	1412436	1411280	0	769	8305	M
NorthernBobwhite_ScaffoldedDeNovo_contig_38107	gi|224381666|ref|NC_011462.1| TGU1	77.94	671	112	11	28244	28901	1414096	1414743	2e-145	526	4224	M
NorthernBobwhite_ScaffoldedDeNovo_contig_95743	gi|224381666|ref|NC_011462.1| TGU1	82.35	68	11	1	260	327	1426793	1426859	4e-09	66	676	M
NorthernBobwhite_ScaffoldedDeNovo_contig_91425	gi|224381666|ref|NC_011462.1| TGU1	85.37	41	5	1	151	190	1440527	1440567	0.024	44	2	M
NorthernBobwhite_ScaffoldedDeNovo_contig_183026	gi|224381666|ref|NC_011462.1| TGU1	71.67	120	30	1	144	263	1465093	1465208	5e-08	62	2	M
NorthernBobwhite_ScaffoldedDeNovo_contig_185264	gi|224381666|ref|NC_011462.1| TGU1	72.16	273	70	3	277	548	1468222	1467955	2e-31	141	512	M
NorthernBobwhite_ScaffoldedDeNovo_contig_54360	gi|224381666|ref|NC_011462.1| TGU1	65.59	619	207	3	252	868	1471214	1471828	2e-33	149	188	M
NorthernBobwhite_ScaffoldedDeNovo_contig_63917	gi|224381666|ref|NC_011462.1| TGU1	71.02	352	101	1	3	353	1471259	1471610	3e-43	179	259	M
NorthernBobwhite_ScaffoldedDeNovo_contig_60661	gi|224381666|ref|NC_011462.1| TGU1	76.14	570	123	13	426	983	1471834	1471266	9e-100	369	445	M
NorthernBobwhite_ScaffoldedDeNovo_contig_55446	gi|224381666|ref|NC_011462.1| TGU1	74.73	562	114	13	3	555	1472976	1472434	2e-90	340	20	M
NorthernBobwhite_ScaffoldedDeNovo_contig_201043	gi|224381666|ref|NC_011462.1| TGU1	70.63	378	102	4	17	387	1473331	1472956	5e-41	172	5	M
NorthernBobwhite_ScaffoldedDeNovo_contig_201042	gi|224381666|ref|NC_011462.1| TGU1	70.29	377	104	3	17	386	1473331	1472956	6e-40	168	5	M
NorthernBobwhite_ScaffoldedDeNovo_contig_69773	gi|224381666|ref|NC_011462.1| TGU1	77.78	603	101	10	1173	1744	1475552	1476152	4e-129	468	13174	M
NorthernBobwhite_ScaffoldedDeNovo_contig_129621	gi|224381666|ref|NC_011462.1| TGU1	90.32	31	3	0	419	449	1476407	1476437	0.073	42	1	S
NorthernBobwhite_ScaffoldedDeNovo_contig_50733	gi|224381666|ref|NC_011462.1| TGU1	74.14	1427	253	34	4898	6238	1481417	1482813	0	861	9278	M
NorthernBobwhite_ScaffoldedDeNovo_contig_84281	gi|224381666|ref|NC_011462.1| TGU1	72.59	748	179	10	877	1607	1483962	1483224	7e-110	403	803	M
NorthernBobwhite_ScaffoldedDeNovo_contig_89528	gi|224381666|ref|NC_011462.1| TGU1	81.16	276	42	3	45	320	1487400	1487135	3e-67	259	5	M
NorthernBobwhite_ScaffoldedDeNovo_contig_90750	gi|224381666|ref|NC_011462.1| TGU1	75.86	319	58	7	25	332	1488907	1488597	1e-53	214	7	M
NorthernBobwhite_ScaffoldedDeNovo_contig_192949	gi|224381666|ref|NC_011462.1| TGU1	100	27	0	0	11	37	1491159	1491133	0.0004	50	16	M
NorthernBobwhite_ScaffoldedDeNovo_contig_119033	gi|224381666|ref|NC_011462.1| TGU1	72.51	171	43	3	302	470	1507203	1507035	2e-15	87	4	M
NorthernBobwhite_ScaffoldedDeNovo_contig_192224	gi|224381666|ref|NC_011462.1| TGU1	71.06	235	58	6	69	302	1507562	1507337	3e-19	100	1	S
NorthernBobwhite_ScaffoldedDeNovo_contig_217029	gi|224381666|ref|NC_011462.1| TGU1	71.06	235	58	6	70	303	1507562	1507337	3e-19	100	1	S
NorthernBobwhite_ScaffoldedDeNovo_contig_218784	gi|224381666|ref|NC_011462.1| TGU1	76.32	76	14	1	240	311	1521335	1521410	2e-05	55	1	S
NorthernBobwhite_ScaffoldedDeNovo_contig_146765	gi|224381666|ref|NC_011462.1| TGU1	88.1	42	3	1	1347	1386	1521805	1521846	0.0004	51	1	S
NorthernBobwhite_ScaffoldedDeNovo_contig_168651	gi|224381666|ref|NC_011462.1| TGU1	87.8	41	3	1	4505	4545	1535070	1535108	0.005	50	8	M
NorthernBobwhite_ScaffoldedDeNovo_contig_211402	gi|224381666|ref|NC_011462.1| TGU1	87.23	47	5	1	55	100	1566496	1566542	8e-06	55	9	M
NorthernBobwhite_ScaffoldedDeNovo_contig_43635	gi|224381666|ref|NC_011462.1| TGU1	90.91	33	1	1	1446	1476	1572713	1572745	0.1	44.6	31	M
NorthernBobwhite_ScaffoldedDeNovo_contig_114483	gi|224381666|ref|NC_011462.1| TGU1	79.64	221	30	2	138	357	1574210	1574416	2e-49	201	25	M
NorthernBobwhite_ScaffoldedDeNovo_contig_104882	gi|224381666|ref|NC_011462.1| TGU1	70.5	1227	245	28	1	1197	1574646	1575785	3e-157	560	3	M
NorthernBobwhite_ScaffoldedDeNovo_contig_134328	gi|224381666|ref|NC_011462.1| TGU1	85.96	463	48	7	1	459	1578143	1577694	7e-147	526	8	M
NorthernBobwhite_ScaffoldedDeNovo_contig_51592	gi|224381666|ref|NC_011462.1| TGU1	85.37	41	6	0	89	129	1595433	1595393	0.001	48	10	M
NorthernBobwhite_ScaffoldedDeNovo_contig_2748	gi|224381666|ref|NC_011462.1| TGU1	78.27	5393	866	64	112397	117631	1622218	1627462	0	4430	81739	M
NorthernBobwhite_ScaffoldedDeNovo_contig_112075	gi|224381666|ref|NC_011462.1| TGU1	69.76	205	42	5	431	635	1637099	1637283	2e-14	86	11	M
NorthernBobwhite_ScaffoldedDeNovo_contig_84922	gi|224381666|ref|NC_011462.1| TGU1	72.13	183	41	4	722	902	1637114	1637288	2e-15	91	490	M
NorthernBobwhite_ScaffoldedDeNovo_contig_124705	gi|224381666|ref|NC_011462.1| TGU1	72.12	165	36	6	299	456	1637136	1637297	1e-10	73	42	M
NorthernBobwhite_ScaffoldedDeNovo_contig_88027	gi|224381666|ref|NC_011462.1| TGU1	75.24	105	23	2	3428	3532	1637162	1637263	6e-08	66	73	M
NorthernBobwhite_ScaffoldedDeNovo_contig_203213	gi|224381666|ref|NC_011462.1| TGU1	72.63	179	40	6	425	596	1637167	1637343	3e-14	84	299	M
NorthernBobwhite_ScaffoldedDeNovo_contig_62114	gi|224381666|ref|NC_011462.1| TGU1	96.55	29	1	0	1	29	1637176	1637204	0.001	48	5	M
NorthernBobwhite_ScaffoldedDeNovo_contig_153962	gi|224381666|ref|NC_011462.1| TGU1	79.75	79	16	0	1195	1273	1637196	1637118	6e-10	71	94	M
NorthernBobwhite_ScaffoldedDeNovo_contig_207463	gi|224381666|ref|NC_011462.1| TGU1	71.43	105	26	1	1	101	1637200	1637304	3e-05	53	6	M
NorthernBobwhite_ScaffoldedDeNovo_contig_206715	gi|224381666|ref|NC_011462.1| TGU1	75.53	94	21	1	479	572	1637217	1637126	3e-08	64	80	M
NorthernBobwhite_ScaffoldedDeNovo_contig_170758	gi|224381666|ref|NC_011462.1| TGU1	73.53	136	26	4	706	835	1637230	1637361	3e-11	75	201	M
NorthernBobwhite_ScaffoldedDeNovo_contig_63951	gi|224381666|ref|NC_011462.1| TGU1	74.81	131	28	2	172	302	1637256	1637131	3e-14	84	82	M
NorthernBobwhite_ScaffoldedDeNovo_contig_201634	gi|224381666|ref|NC_011462.1| TGU1	73.27	101	25	1	179	277	1637260	1637160	3e-06	59	3	M
NorthernBobwhite_ScaffoldedDeNovo_contig_47051	gi|224381666|ref|NC_011462.1| TGU1	71.59	176	41	4	1010	1183	1637279	1637111	9e-13	82	113	M
NorthernBobwhite_ScaffoldedDeNovo_contig_58620	gi|224381666|ref|NC_011462.1| TGU1	66.23	154	26	4	888	1041	1637298	1637171	0.013	50	24	M
NorthernBobwhite_ScaffoldedDeNovo_contig_208397	gi|224381666|ref|NC_011462.1| TGU1	71.98	232	46	7	388	619	1694389	1694601	4e-22	111	6	M
NorthernBobwhite_ScaffoldedDeNovo_contig_130114	gi|224381666|ref|NC_011462.1| TGU1	68.64	220	51	8	239	449	1694391	1694601	6e-09	66	25	M
NorthernBobwhite_ScaffoldedDeNovo_contig_172912	gi|224381666|ref|NC_011462.1| TGU1	71.5	207	49	6	1	204	1694392	1694591	2e-15	89	37	M
NorthernBobwhite_ScaffoldedDeNovo_contig_124891	gi|224381666|ref|NC_011462.1| TGU1	76.07	117	20	5	9	124	1694395	1694504	9e-10	69	79	M
NorthernBobwhite_ScaffoldedDeNovo_contig_129217	gi|224381666|ref|NC_011462.1| TGU1	68	225	45	8	112	332	1694400	1694601	4e-09	69	32	M
NorthernBobwhite_ScaffoldedDeNovo_contig_215226	gi|224381666|ref|NC_011462.1| TGU1	68.58	226	53	5	184	398	1694401	1694619	7e-14	82	2	M
NorthernBobwhite_ScaffoldedDeNovo_contig_169674	gi|224381666|ref|NC_011462.1| TGU1	70.59	187	30	12	644	824	1694441	1694608	4e-06	59	10	M
NorthernBobwhite_ScaffoldedDeNovo_contig_172733	gi|224381666|ref|NC_011462.1| TGU1	74.05	185	36	7	342	520	1694449	1694627	5e-18	96	14	M
NorthernBobwhite_ScaffoldedDeNovo_contig_98361	gi|224381666|ref|NC_011462.1| TGU1	77.03	74	17	0	430	503	1694457	1694384	5e-06	57	8	M
NorthernBobwhite_ScaffoldedDeNovo_contig_195416	gi|224381666|ref|NC_011462.1| TGU1	70.59	119	29	4	287	402	1694488	1694603	0.022	44	5	M
NorthernBobwhite_ScaffoldedDeNovo_contig_194904	gi|224381666|ref|NC_011462.1| TGU1	70.75	147	29	5	3	145	1694491	1694627	6e-08	62	51	M
NorthernBobwhite_ScaffoldedDeNovo_contig_187889	gi|224381666|ref|NC_011462.1| TGU1	73.42	158	28	9	394	544	1694539	1694389	5e-09	68	4	M
NorthernBobwhite_ScaffoldedDeNovo_contig_171317	gi|224381666|ref|NC_011462.1| TGU1	73.11	119	22	3	857	975	1694599	1694491	2e-08	66	68	M
NorthernBobwhite_ScaffoldedDeNovo_contig_31464	gi|224381666|ref|NC_011462.1| TGU1	79.13	115	19	2	507	616	1694603	1694489	3e-17	95	388	M
NorthernBobwhite_ScaffoldedDeNovo_contig_210697	gi|224381666|ref|NC_011462.1| TGU1	71.67	120	29	2	1	117	1694605	1694488	1e-06	59	14	M
NorthernBobwhite_ScaffoldedDeNovo_contig_72803	gi|224381666|ref|NC_011462.1| TGU1	79.31	87	15	1	346	429	1704819	1704905	1e-11	75	1234	M
NorthernBobwhite_ScaffoldedDeNovo_contig_147140	gi|224381666|ref|NC_011462.1| TGU1	82.43	74	12	1	3064	3136	1712219	1712292	1e-09	71	20	M
NorthernBobwhite_ScaffoldedDeNovo_contig_218465	gi|224381666|ref|NC_011462.1| TGU1	76.36	55	13	0	107	161	1712261	1712315	0.18	41	3	M
NorthernBobwhite_ScaffoldedDeNovo_contig_107813	gi|224381666|ref|NC_011462.1| TGU1	100	22	0	0	547	568	1722000	1722021	0.4	41	15	M
NorthernBobwhite_ScaffoldedDeNovo_contig_69044	gi|224381666|ref|NC_011462.1| TGU1	68.46	390	97	8	14	379	1725870	1726257	1e-29	136	2802	M
NorthernBobwhite_ScaffoldedDeNovo_contig_21089	gi|224381666|ref|NC_011462.1| TGU1	75.33	3450	638	62	28212	31576	1746597	1743276	0	2298	15836	M
NorthernBobwhite_ScaffoldedDeNovo_contig_139162	gi|224381666|ref|NC_011462.1| TGU1	76.56	64	14	1	185	247	1746631	1746568	0.024	44	2	M
NorthernBobwhite_ScaffoldedDeNovo_contig_53199	gi|224381666|ref|NC_011462.1| TGU1	76.31	1237	158	27	892	2100	1747761	1746632	0	910	1	S
NorthernBobwhite_ScaffoldedDeNovo_contig_152015	gi|224381666|ref|NC_011462.1| TGU1	84.44	45	7	0	136	180	1752862	1752906	0.0003	50	3	M
NorthernBobwhite_ScaffoldedDeNovo_contig_162424	gi|224381666|ref|NC_011462.1| TGU1	88.64	44	5	0	144	187	1752908	1752865	2e-06	57	2	M
NorthernBobwhite_ScaffoldedDeNovo_contig_67687	gi|224381666|ref|NC_011462.1| TGU1	69.16	522	116	13	473	967	1753524	1754027	4e-48	197	29	M
NorthernBobwhite_ScaffoldedDeNovo_contig_66177	gi|224381666|ref|NC_011462.1| TGU1	82	50	9	0	635	684	1758351	1758302	0.0007	50	2	M
NorthernBobwhite_ScaffoldedDeNovo_contig_202585	gi|224381666|ref|NC_011462.1| TGU1	86.36	44	6	0	99	142	1775787	1775830	3e-05	53	222	M
NorthernBobwhite_ScaffoldedDeNovo_contig_21088	gi|224381666|ref|NC_011462.1| TGU1	77.89	1325	229	22	11144	12439	1789460	1790749	0	1027	2155	M
NorthernBobwhite_ScaffoldedDeNovo_contig_101802	gi|224381666|ref|NC_011462.1| TGU1	85.71	42	5	1	128	169	1793294	1793254	0.009	46	2	M
NorthernBobwhite_ScaffoldedDeNovo_contig_141199	gi|224381666|ref|NC_011462.1| TGU1	87.5	40	4	1	38	76	1803589	1803628	0.015	46	2	M
NorthernBobwhite_ScaffoldedDeNovo_contig_155023	gi|224381666|ref|NC_011462.1| TGU1	76.19	168	19	10	162	311	1806469	1806305	7e-18	96	1	S
NorthernBobwhite_ScaffoldedDeNovo_contig_8753	gi|224381666|ref|NC_011462.1| TGU1	85	1053	83	11	8965	9948	1817578	1818624	0	1205	35831	M
NorthernBobwhite_ScaffoldedDeNovo_contig_208995	gi|224381666|ref|NC_011462.1| TGU1	75.43	232	48	4	92	318	1820911	1820684	4e-35	152	126	M
NorthernBobwhite_ScaffoldedDeNovo_contig_46153	gi|224381666|ref|NC_011462.1| TGU1	74.14	232	51	4	91	317	1820911	1820684	8e-31	138	236	M
NorthernBobwhite_ScaffoldedDeNovo_contig_28742	gi|224381666|ref|NC_011462.1| TGU1	86.11	36	5	0	70	105	1849879	1849914	0.047	42	1	S
NorthernBobwhite_ScaffoldedDeNovo_contig_97041	gi|224381666|ref|NC_011462.1| TGU1	86.11	36	5	0	70	105	1849879	1849914	0.047	42	1	S
NorthernBobwhite_ScaffoldedDeNovo_contig_179316	gi|224381666|ref|NC_011462.1| TGU1	81.25	48	6	1	156	200	1852112	1852065	0.015	44	2	M
NorthernBobwhite_ScaffoldedDeNovo_contig_102327	gi|224381666|ref|NC_011462.1| TGU1	73.36	578	130	11	25	582	1856683	1857256	3e-85	320	10744	M
NorthernBobwhite_ScaffoldedDeNovo_contig_56449	gi|224381666|ref|NC_011462.1| TGU1	68.48	184	51	3	104	284	1859207	1859028	1e-08	64	1	S
NorthernBobwhite_ScaffoldedDeNovo_contig_148527	gi|224381666|ref|NC_011462.1| TGU1	81.63	49	9	0	225	273	1870130	1870082	0.006	48	4	M
NorthernBobwhite_ScaffoldedDeNovo_contig_24977	gi|224381666|ref|NC_011462.1| TGU1	76.89	1233	209	24	3490	4671	1883466	1882259	0	899	16994	M
NorthernBobwhite_ScaffoldedDeNovo_contig_38638	gi|224381666|ref|NC_011462.1| TGU1	69.32	1105	206	20	3069	4122	1891403	1892425	1e-136	495	434	M
NorthernBobwhite_ScaffoldedDeNovo_contig_196407	gi|224381666|ref|NC_011462.1| TGU1	72.92	96	14	2	8	91	1892870	1892965	6e-07	59	2	M
NorthernBobwhite_ScaffoldedDeNovo_contig_179576	gi|224381666|ref|NC_011462.1| TGU1	85	240	31	1	67	301	1900294	1900533	1e-70	271	7	M
NorthernBobwhite_ScaffoldedDeNovo_contig_62027	gi|224381666|ref|NC_011462.1| TGU1	70.13	472	103	10	511	962	1901730	1902183	6e-50	205	14	M
NorthernBobwhite_ScaffoldedDeNovo_contig_47811	gi|224381666|ref|NC_011462.1| TGU1	68.73	825	176	23	122	901	1905566	1904779	2e-77	295	5	M
NorthernBobwhite_ScaffoldedDeNovo_contig_95772	gi|224381666|ref|NC_011462.1| TGU1	71.46	431	101	5	124	540	1910726	1911148	2e-55	221	1553	M
NorthernBobwhite_ScaffoldedDeNovo_contig_115472	gi|224381666|ref|NC_011462.1| TGU1	68.4	307	84	5	752	1051	1911561	1911261	2e-20	105	2537	M
NorthernBobwhite_ScaffoldedDeNovo_contig_27456	gi|224381666|ref|NC_011462.1| TGU1	88.89	36	3	1	98	132	1921247	1921282	0.014	44	1	S
NorthernBobwhite_ScaffoldedDeNovo_contig_11089	gi|224381666|ref|NC_011462.1| TGU1	67.29	2745	550	85	2387	4937	1924401	1921811	0	832	3245	M
NorthernBobwhite_ScaffoldedDeNovo_contig_186583	gi|224381666|ref|NC_011462.1| TGU1	68.73	339	79	8	279	613	1924845	1925160	1e-25	122	1	S
NorthernBobwhite_ScaffoldedDeNovo_contig_140170	gi|224381666|ref|NC_011462.1| TGU1	73.33	90	19	2	4	88	1925172	1925261	0.0005	50	2	S
NorthernBobwhite_ScaffoldedDeNovo_contig_146455	gi|224381666|ref|NC_011462.1| TGU1	68.4	250	62	7	128	363	1925418	1925172	7e-13	78	3	M
NorthernBobwhite_ScaffoldedDeNovo_contig_37996	gi|224381666|ref|NC_011462.1| TGU1	70.5	556	118	12	195	738	1926307	1926828	3e-64	251	4	S
NorthernBobwhite_ScaffoldedDeNovo_contig_34470	gi|224381666|ref|NC_011462.1| TGU1	77.41	841	131	14	3456	4263	1937945	1937131	0	650	8786	M
NorthernBobwhite_ScaffoldedDeNovo_contig_74756	gi|224381666|ref|NC_011462.1| TGU1	74.64	351	81	6	30	378	1943872	1943528	2e-52	212	1	S
NorthernBobwhite_ScaffoldedDeNovo_contig_34471	gi|224381666|ref|NC_011462.1| TGU1	75.74	202	34	3	416	613	1945481	1945671	4e-32	143	3	M
NorthernBobwhite_ScaffoldedDeNovo_contig_36517	gi|224381666|ref|NC_011462.1| TGU1	81.03	390	60	5	27	413	1946947	1947325	2e-97	360	2	M
NorthernBobwhite_ScaffoldedDeNovo_contig_85295	gi|224381666|ref|NC_011462.1| TGU1	78.04	214	35	4	2527	2737	1948734	1948938	2e-38	167	1	S
NorthernBobwhite_ScaffoldedDeNovo_contig_178174	gi|224381666|ref|NC_011462.1| TGU1	78.57	238	48	2	1	236	1950976	1951212	1e-47	194	2	M
NorthernBobwhite_ScaffoldedDeNovo_contig_96007	gi|224381666|ref|NC_011462.1| TGU1	70.97	186	34	8	16	199	1957355	1957188	1e-11	75	6	M
NorthernBobwhite_ScaffoldedDeNovo_contig_68482	gi|224381666|ref|NC_011462.1| TGU1	70.84	463	88	10	11	455	1959921	1960354	7e-56	224	5	M
NorthernBobwhite_ScaffoldedDeNovo_contig_25151	gi|224381666|ref|NC_011462.1| TGU1	75.15	664	137	9	5300	5941	1960525	1961182	4e-120	439	7	M
NorthernBobwhite_ScaffoldedDeNovo_contig_91942	gi|224381666|ref|NC_011462.1| TGU1	75.66	226	47	4	2602	2825	1963312	1963093	4e-33	149	3	S
NorthernBobwhite_ScaffoldedDeNovo_contig_202505	gi|224381666|ref|NC_011462.1| TGU1	87.88	33	4	0	1	33	1969814	1969782	0.046	42	1	S
NorthernBobwhite_ScaffoldedDeNovo_contig_215050	gi|224381666|ref|NC_011462.1| TGU1	83.72	43	6	1	307	349	1970317	1970358	0.092	42	1	S
NorthernBobwhite_ScaffoldedDeNovo_contig_163119	gi|224381666|ref|NC_011462.1| TGU1	83.16	196	26	5	1	192	1972783	1972975	1e-45	188	18	M
NorthernBobwhite_ScaffoldedDeNovo_contig_62255	gi|224381666|ref|NC_011462.1| TGU1	80	65	13	0	2591	2655	1974260	1974196	6e-06	59	2	S
NorthernBobwhite_ScaffoldedDeNovo_contig_76958	gi|224381666|ref|NC_011462.1| TGU1	79.59	338	49	5	595	930	1975762	1975443	5e-77	295	2	S
NorthernBobwhite_ScaffoldedDeNovo_contig_53276	gi|224381666|ref|NC_011462.1| TGU1	72.43	185	36	8	540	715	1979612	1979434	1e-13	82	2	M
NorthernBobwhite_ScaffoldedDeNovo_contig_131734	gi|224381666|ref|NC_011462.1| TGU1	74.7	332	82	2	440	770	1980997	1981327	3e-53	214	1	S
NorthernBobwhite_ScaffoldedDeNovo_contig_160050	gi|224381666|ref|NC_011462.1| TGU1	77.36	53	5	1	1	46	1983107	1983159	0.02	44	1	S
NorthernBobwhite_ScaffoldedDeNovo_contig_158081	gi|224381666|ref|NC_011462.1| TGU1	77.78	144	30	1	2679	2820	1983691	1983834	4e-22	113	3	S
NorthernBobwhite_ScaffoldedDeNovo_contig_75273	gi|224381666|ref|NC_011462.1| TGU1	78.26	207	41	2	61	263	1984784	1984990	1e-38	165	7	M
NorthernBobwhite_ScaffoldedDeNovo_contig_61615	gi|224381666|ref|NC_011462.1| TGU1	93.55	31	2	0	678	708	2004050	2004020	0.004	48	1	S
NorthernBobwhite_ScaffoldedDeNovo_contig_69929	gi|224381666|ref|NC_011462.1| TGU1	90.32	31	3	0	54	84	2017873	2017843	0.082	42	1	S
NorthernBobwhite_ScaffoldedDeNovo_contig_135953	gi|224381666|ref|NC_011462.1| TGU1	91.89	37	3	0	280	316	2018944	2018908	3e-05	53	25	M
NorthernBobwhite_ScaffoldedDeNovo_contig_141421	gi|224381666|ref|NC_011462.1| TGU1	73.56	208	55	0	2	209	2020728	2020935	1e-27	127	22	M
NorthernBobwhite_ScaffoldedDeNovo_contig_114145	gi|224381666|ref|NC_011462.1| TGU1	80.56	72	11	1	292	363	2020838	2020906	5e-09	66	12	M
NorthernBobwhite_ScaffoldedDeNovo_contig_100038	gi|224381666|ref|NC_011462.1| TGU1	70.51	217	54	2	5	219	2020936	2020728	2e-20	104	11	M
NorthernBobwhite_ScaffoldedDeNovo_contig_16952	gi|224381666|ref|NC_011462.1| TGU1	76.5	953	169	18	27927	28869	2032539	2033446	0	677	38294	M
NorthernBobwhite_ScaffoldedDeNovo_contig_32391	gi|224381666|ref|NC_011462.1| TGU1	78.14	1002	177	14	476	1453	2051966	2052949	0	794	7700	M
NorthernBobwhite_ScaffoldedDeNovo_contig_145175	gi|224381666|ref|NC_011462.1| TGU1	86	50	7	0	30	79	2071567	2071518	6e-07	59	6	M
NorthernBobwhite_ScaffoldedDeNovo_contig_71344	gi|224381666|ref|NC_011462.1| TGU1	74.67	2073	393	39	23	2030	2085889	2087894	0	1315	2	S
NorthernBobwhite_ScaffoldedDeNovo_contig_86830	gi|224381666|ref|NC_011462.1| TGU1	81.03	58	7	2	9409	9462	2089669	2089612	0.011	50	1	S
NorthernBobwhite_ScaffoldedDeNovo_contig_9180	gi|224381666|ref|NC_011462.1| TGU1	74.35	1123	258	11	4397	5507	2091591	2090487	0	704	30182	M
NorthernBobwhite_ScaffoldedDeNovo_contig_211790	gi|224381666|ref|NC_011462.1| TGU1	81.48	54	3	2	319	372	2092565	2092611	0.0005	50	6	M
NorthernBobwhite_ScaffoldedDeNovo_contig_206680	gi|224381666|ref|NC_011462.1| TGU1	85.93	199	27	1	48	246	2114346	2114543	3e-58	230	4	M
NorthernBobwhite_ScaffoldedDeNovo_contig_185238	gi|224381666|ref|NC_011462.1| TGU1	95.65	23	1	0	155	177	2126642	2126664	2	37.4	8	M
NorthernBobwhite_ScaffoldedDeNovo_contig_52846	gi|224381666|ref|NC_011462.1| TGU1	95.65	23	1	0	170	192	2126664	2126642	1.9	37.4	2	M
NorthernBobwhite_ScaffoldedDeNovo_contig_4346	gi|224381666|ref|NC_011462.1| TGU1	77.54	935	147	18	39933	40818	2132677	2133597	0	715	8001	M
NorthernBobwhite_ScaffoldedDeNovo_contig_18611	gi|224381666|ref|NC_011462.1| TGU1	88.82	152	17	0	449	600	2134843	2134994	5e-48	197	319	M
NorthernBobwhite_ScaffoldedDeNovo_contig_176193	gi|224381666|ref|NC_011462.1| TGU1	92.63	95	7	0	210	304	2140344	2140438	3e-31	140	8	M
NorthernBobwhite_ScaffoldedDeNovo_contig_77676	gi|224381666|ref|NC_011462.1| TGU1	82.22	225	37	3	267	490	2142226	2142004	1e-53	215	7	M
NorthernBobwhite_ScaffoldedDeNovo_contig_200148	gi|224381666|ref|NC_011462.1| TGU1	82.61	46	8	0	220	265	2158319	2158364	0.001	48	10	M
NorthernBobwhite_ScaffoldedDeNovo_contig_135576	gi|224381666|ref|NC_011462.1| TGU1	78.76	113	21	3	245	355	2171341	2171230	7e-15	86	969	M
NorthernBobwhite_ScaffoldedDeNovo_contig_78378	gi|224381666|ref|NC_011462.1| TGU1	84.29	70	8	2	795	862	2187796	2187728	3e-10	71	71	M
NorthernBobwhite_ScaffoldedDeNovo_contig_172998	gi|224381666|ref|NC_011462.1| TGU1	76.6	94	17	3	181	274	2187798	2187710	1e-07	62	30	M
NorthernBobwhite_ScaffoldedDeNovo_contig_105055	gi|224381666|ref|NC_011462.1| TGU1	68.51	181	32	8	212	386	2219250	2219411	3e-06	57	3	M
NorthernBobwhite_ScaffoldedDeNovo_contig_171875	gi|224381666|ref|NC_011462.1| TGU1	67.96	181	33	8	214	388	2219250	2219411	0.0001	51	1	S
NorthernBobwhite_ScaffoldedDeNovo_contig_5003	gi|224381666|ref|NC_011462.1| TGU1	74.31	1156	273	10	28069	29206	2238476	2237327	0	722	31241	M
NorthernBobwhite_ScaffoldedDeNovo_contig_50351	gi|224381666|ref|NC_011462.1| TGU1	90.91	33	2	1	159	190	2244754	2244786	0.056	42	1	S
NorthernBobwhite_ScaffoldedDeNovo_contig_5004	gi|224381666|ref|NC_011462.1| TGU1	69.08	304	73	9	75	368	2255353	2255645	2e-19	104	4	S
NorthernBobwhite_ScaffoldedDeNovo_contig_79059	gi|224381666|ref|NC_011462.1| TGU1	78.26	46	10	0	302	347	2257068	2257023	0.64	39.2	17	M
NorthernBobwhite_ScaffoldedDeNovo_contig_50629	gi|224381666|ref|NC_011462.1| TGU1	75.56	180	31	3	12	180	2268221	2268044	1e-26	125	7	M
NorthernBobwhite_ScaffoldedDeNovo_contig_170650	gi|224381666|ref|NC_011462.1| TGU1	72.62	420	97	6	34	438	2272269	2272685	2e-57	228	6	M
NorthernBobwhite_ScaffoldedDeNovo_contig_65207	gi|224381666|ref|NC_011462.1| TGU1	83.1	71	10	1	686	756	2274529	2274461	2e-10	71	2361	M
NorthernBobwhite_ScaffoldedDeNovo_contig_72030	gi|224381666|ref|NC_011462.1| TGU1	70.95	420	98	11	2632	3035	2275731	2275320	4e-42	179	10895	M
NorthernBobwhite_ScaffoldedDeNovo_contig_9375	gi|224381666|ref|NC_011462.1| TGU1	72.96	2282	470	42	5897	8150	2291538	2293700	0	1278	11056	M
NorthernBobwhite_ScaffoldedDeNovo_contig_42686	gi|224381666|ref|NC_011462.1| TGU1	73.72	156	34	5	70	220	2315842	2315995	2e-13	80	2	S
NorthernBobwhite_ScaffoldedDeNovo_contig_42685	gi|224381666|ref|NC_011462.1| TGU1	74.36	156	33	5	70	220	2315842	2315995	4e-15	86	1	S
NorthernBobwhite_ScaffoldedDeNovo_contig_26239	gi|224381666|ref|NC_011462.1| TGU1	70.99	1327	278	29	1088	2357	2316782	2318058	2e-175	623	14	M
NorthernBobwhite_ScaffoldedDeNovo_contig_86872	gi|224381666|ref|NC_011462.1| TGU1	82.93	41	7	0	355	395	2320120	2320160	0.073	42	1	S
NorthernBobwhite_ScaffoldedDeNovo_contig_27647	gi|224381666|ref|NC_011462.1| TGU1	70.14	1912	410	55	12721	14559	2337729	2339552	0	771	15432	M
NorthernBobwhite_ScaffoldedDeNovo_contig_122897	gi|224381666|ref|NC_011462.1| TGU1	74.29	210	35	3	454	646	2340813	2341020	6e-31	140	1	S
NorthernBobwhite_ScaffoldedDeNovo_contig_132745	gi|224381666|ref|NC_011462.1| TGU1	67	297	85	6	181	474	2341497	2341211	1e-12	78	5	M
NorthernBobwhite_ScaffoldedDeNovo_contig_194313	gi|224381666|ref|NC_011462.1| TGU1	76.04	96	22	1	184	279	2343530	2343436	4e-09	66	2	M
NorthernBobwhite_ScaffoldedDeNovo_contig_80426	gi|224381666|ref|NC_011462.1| TGU1	89.19	37	4	0	1733	1769	2347560	2347524	0.002	50	17	M
NorthernBobwhite_ScaffoldedDeNovo_contig_179743	gi|224381666|ref|NC_011462.1| TGU1	76.85	108	24	1	113	220	2363527	2363633	8e-13	78	3	M
NorthernBobwhite_ScaffoldedDeNovo_contig_141948	gi|224381666|ref|NC_011462.1| TGU1	83.72	43	6	1	320	362	2375109	2375068	0.067	42	1	S
NorthernBobwhite_ScaffoldedDeNovo_contig_96717	gi|224381666|ref|NC_011462.1| TGU1	70.93	461	103	9	611	1051	2379869	2380318	1e-53	215	66	M
NorthernBobwhite_ScaffoldedDeNovo_contig_871	gi|224381666|ref|NC_011462.1| TGU1	80.14	1153	151	24	5393	6489	2381838	2380708	0	1009	4615	M
NorthernBobwhite_ScaffoldedDeNovo_contig_121797	gi|224381666|ref|NC_011462.1| TGU1	76.06	376	72	6	1	362	2386445	2386074	3e-68	262	4	M
NorthernBobwhite_ScaffoldedDeNovo_contig_125676	gi|224381666|ref|NC_011462.1| TGU1	71.82	181	40	5	716	888	2399789	2399966	5e-14	84	4	M
NorthernBobwhite_ScaffoldedDeNovo_contig_150682	gi|224381666|ref|NC_011462.1| TGU1	84.62	39	3	1	102	140	2409184	2409219	0.055	42	1	S
NorthernBobwhite_ScaffoldedDeNovo_contig_971	gi|224381666|ref|NC_011462.1| TGU1	73.99	2853	489	65	63091	65836	2422767	2420061	0	1736	64000	M
NorthernBobwhite_ScaffoldedDeNovo_contig_108222	gi|224381666|ref|NC_011462.1| TGU1	86.96	46	5	1	348	392	2433182	2433227	3e-05	53	8	M
NorthernBobwhite_ScaffoldedDeNovo_contig_37623	gi|224381666|ref|NC_011462.1| TGU1	71.23	146	29	4	37	179	2437742	2437607	1e-09	68	2	S
NorthernBobwhite_ScaffoldedDeNovo_contig_37622	gi|224381666|ref|NC_011462.1| TGU1	71.92	146	28	4	37	179	2437742	2437607	3e-11	73	2	S
NorthernBobwhite_ScaffoldedDeNovo_contig_3634	gi|224381666|ref|NC_011462.1| TGU1	73.02	1349	301	28	14271	15589	2455898	2454583	0	722	34527	M
NorthernBobwhite_ScaffoldedDeNovo_contig_87646	gi|224381666|ref|NC_011462.1| TGU1	74.38	121	24	4	2399	2514	2463788	2463906	3e-08	68	68	M
NorthernBobwhite_ScaffoldedDeNovo_contig_187612	gi|224381666|ref|NC_011462.1| TGU1	74.55	110	23	3	112	217	2463821	2463929	1e-07	64	100	M
NorthernBobwhite_ScaffoldedDeNovo_contig_128625	gi|224381666|ref|NC_011462.1| TGU1	69.82	719	143	22	531	1199	2485189	2485883	1e-74	286	6	M
NorthernBobwhite_ScaffoldedDeNovo_contig_33580	gi|224381666|ref|NC_011462.1| TGU1	81.69	366	58	3	23	385	2487980	2487621	5e-95	352	6	M
NorthernBobwhite_ScaffoldedDeNovo_contig_74142	gi|224381666|ref|NC_011462.1| TGU1	77.25	633	124	10	2	627	2494313	2494932	3e-128	466	11572	M
NorthernBobwhite_ScaffoldedDeNovo_contig_137852	gi|224381666|ref|NC_011462.1| TGU1	90.57	265	21	1	10	270	2497323	2497587	3e-99	365	3	M
NorthernBobwhite_ScaffoldedDeNovo_contig_179289	gi|224381666|ref|NC_011462.1| TGU1	74.55	558	122	9	421	961	2504090	2503536	4e-92	343	1203	M
NorthernBobwhite_ScaffoldedDeNovo_contig_37097	gi|224381666|ref|NC_011462.1| TGU1	73.12	1142	210	25	7854	8943	2507742	2506646	0	650	774	M
NorthernBobwhite_ScaffoldedDeNovo_contig_114728	gi|224381666|ref|NC_011462.1| TGU1	77.44	133	28	1	132	264	2513719	2513589	6e-20	102	1476	M
NorthernBobwhite_ScaffoldedDeNovo_contig_205314	gi|224381666|ref|NC_011462.1| TGU1	72.31	307	55	5	43	320	2517277	2517582	3e-42	176	1	S
NorthernBobwhite_ScaffoldedDeNovo_contig_121610	gi|224381666|ref|NC_011462.1| TGU1	72.86	339	59	7	23	332	2517582	2517248	4e-48	196	1	S
NorthernBobwhite_ScaffoldedDeNovo_contig_218494	gi|224381666|ref|NC_011462.1| TGU1	88.57	35	4	0	79	113	2529022	2529056	0.006	46	7	M
NorthernBobwhite_ScaffoldedDeNovo_contig_216611	gi|224381666|ref|NC_011462.1| TGU1	80.3	66	10	3	507	571	2547124	2547187	0.0006	50	19	M
NorthernBobwhite_ScaffoldedDeNovo_contig_204725	gi|224381666|ref|NC_011462.1| TGU1	83.02	53	8	1	237	289	2547182	2547131	0.0002	51	19	M
NorthernBobwhite_ScaffoldedDeNovo_contig_188512	gi|224381666|ref|NC_011462.1| TGU1	80.65	62	11	1	340	401	2547183	2547123	2e-05	55	18	M
NorthernBobwhite_ScaffoldedDeNovo_contig_51747	gi|224381666|ref|NC_011462.1| TGU1	82.09	67	11	1	824	890	2547187	2547122	1e-07	64	10	M
NorthernBobwhite_ScaffoldedDeNovo_contig_150119	gi|224381666|ref|NC_011462.1| TGU1	82.46	57	7	3	1	55	2549302	2549247	0.001	48	8	M
NorthernBobwhite_ScaffoldedDeNovo_contig_95755	gi|224381666|ref|NC_011462.1| TGU1	75.61	82	14	3	968	1044	2555805	2555725	0.002	50	10	M
NorthernBobwhite_ScaffoldedDeNovo_contig_171512	gi|224381666|ref|NC_011462.1| TGU1	86.05	43	5	1	345	386	2556219	2556261	0.003	48	2	S
NorthernBobwhite_ScaffoldedDeNovo_contig_76803	gi|224381666|ref|NC_011462.1| TGU1	84.62	52	8	0	2	53	2559706	2559757	2e-06	59	239	M
NorthernBobwhite_ScaffoldedDeNovo_contig_105272	gi|224381666|ref|NC_011462.1| TGU1	64.39	410	89	15	1480	1843	2597192	2597590	4e-08	66	10	M
NorthernBobwhite_ScaffoldedDeNovo_contig_218609	gi|224381666|ref|NC_011462.1| TGU1	84.62	39	5	1	367	404	2598483	2598445	0.21	41	16	M
NorthernBobwhite_ScaffoldedDeNovo_contig_97691	gi|224381666|ref|NC_011462.1| TGU1	72.92	1023	205	21	217	1216	2600510	2599537	1e-158	567	20	M
NorthernBobwhite_ScaffoldedDeNovo_contig_41774	gi|224381666|ref|NC_011462.1| TGU1	70.75	964	234	22	3168	4117	2607841	2608770	1e-111	412	289	M
NorthernBobwhite_ScaffoldedDeNovo_contig_84583	gi|224381666|ref|NC_011462.1| TGU1	71.39	678	189	2	336	1009	2622110	2621434	4e-92	343	9	M
NorthernBobwhite_ScaffoldedDeNovo_contig_215484	gi|224381666|ref|NC_011462.1| TGU1	96.3	27	1	0	310	336	2622392	2622366	0.014	44	1	S
NorthernBobwhite_ScaffoldedDeNovo_contig_142829	gi|224381666|ref|NC_011462.1| TGU1	69.84	252	64	3	30	272	2630465	2630713	4e-22	109	3	M
NorthernBobwhite_ScaffoldedDeNovo_contig_142830	gi|224381666|ref|NC_011462.1| TGU1	69.84	252	64	3	30	272	2630465	2630713	4e-22	109	4	M
NorthernBobwhite_ScaffoldedDeNovo_contig_171342	gi|224381666|ref|NC_011462.1| TGU1	85	40	6	0	85	124	2632461	2632422	0.004	46	8	M
NorthernBobwhite_ScaffoldedDeNovo_contig_205088	gi|224381666|ref|NC_011462.1| TGU1	88.89	126	14	0	21	146	2632930	2632805	6e-39	165	3	M
NorthernBobwhite_ScaffoldedDeNovo_contig_20245	gi|224381666|ref|NC_011462.1| TGU1	77.12	2740	468	47	31162	33854	2640824	2643451	0	2046	15850	M
NorthernBobwhite_ScaffoldedDeNovo_contig_125517	gi|224381666|ref|NC_011462.1| TGU1	72.79	147	36	1	1	143	2657640	2657786	3e-14	84	56	M
NorthernBobwhite_ScaffoldedDeNovo_contig_148925	gi|224381666|ref|NC_011462.1| TGU1	70.1	204	34	5	247	448	2657640	2657818	7e-17	95	48	M
NorthernBobwhite_ScaffoldedDeNovo_contig_170239	gi|224381666|ref|NC_011462.1| TGU1	86.49	37	1	1	1	37	2657641	2657673	0.028	44	21	M
NorthernBobwhite_ScaffoldedDeNovo_contig_197208	gi|224381666|ref|NC_011462.1| TGU1	71.2	125	21	3	335	459	2657641	2657750	2e-08	64	29	M
NorthernBobwhite_ScaffoldedDeNovo_contig_168284	gi|224381666|ref|NC_011462.1| TGU1	72.33	159	32	3	564	722	2657642	2657788	2e-14	86	58	M
NorthernBobwhite_ScaffoldedDeNovo_contig_31048	gi|224381666|ref|NC_011462.1| TGU1	69.41	170	45	3	320	488	2657650	2657813	1e-07	66	8	M
NorthernBobwhite_ScaffoldedDeNovo_contig_203435	gi|224381666|ref|NC_011462.1| TGU1	72.84	162	34	7	63	215	2657658	2657818	2e-10	71	280	M
NorthernBobwhite_ScaffoldedDeNovo_contig_30333	gi|224381666|ref|NC_011462.1| TGU1	73.91	138	18	4	2019	2156	2657663	2657782	3e-13	86	929	M
NorthernBobwhite_ScaffoldedDeNovo_contig_93292	gi|224381666|ref|NC_011462.1| TGU1	75.45	110	15	5	4608	4717	2657665	2657762	8e-08	66	82	M
NorthernBobwhite_ScaffoldedDeNovo_contig_220169	gi|224381666|ref|NC_011462.1| TGU1	82.98	47	7	1	265	310	2657792	2657746	0.004	46	3	M
NorthernBobwhite_ScaffoldedDeNovo_contig_218513	gi|224381666|ref|NC_011462.1| TGU1	66.67	186	39	6	1	185	2657803	2657640	0.0003	50	16	M
NorthernBobwhite_ScaffoldedDeNovo_contig_45964	gi|224381666|ref|NC_011462.1| TGU1	70.78	154	43	1	1004	1155	2657807	2657654	3e-10	73	117	M
NorthernBobwhite_ScaffoldedDeNovo_contig_98263	gi|224381666|ref|NC_011462.1| TGU1	80.36	56	11	0	1	56	2657808	2657753	0.0006	51	41	M
NorthernBobwhite_ScaffoldedDeNovo_contig_206618	gi|224381666|ref|NC_011462.1| TGU1	69.7	198	32	8	1	195	2657813	2657641	8e-12	77	24	M
NorthernBobwhite_ScaffoldedDeNovo_contig_189070	gi|224381666|ref|NC_011462.1| TGU1	67.56	225	39	5	692	915	2657825	2657634	3e-14	86	95	M
NorthernBobwhite_ScaffoldedDeNovo_contig_60882	gi|224381666|ref|NC_011462.1| TGU1	92.59	27	2	0	450	476	2678091	2678065	0.3	41	23	M
NorthernBobwhite_ScaffoldedDeNovo_contig_191866	gi|224381666|ref|NC_011462.1| TGU1	70.97	248	58	4	209	445	2685449	2685205	1e-24	118	1	S
NorthernBobwhite_ScaffoldedDeNovo_contig_200792	gi|224381666|ref|NC_011462.1| TGU1	75.4	248	57	3	209	455	2685449	2685205	3e-38	163	2	M
NorthernBobwhite_ScaffoldedDeNovo_contig_214169	gi|224381666|ref|NC_011462.1| TGU1	91.18	34	3	0	345	378	2698749	2698782	0.002	48	6	M
NorthernBobwhite_ScaffoldedDeNovo_contig_174363	gi|224381666|ref|NC_011462.1| TGU1	79.06	487	85	7	2	475	2699898	2700380	2e-110	403	21	M
NorthernBobwhite_ScaffoldedDeNovo_contig_77246	gi|224381666|ref|NC_011462.1| TGU1	92.59	27	2	0	94	120	2705793	2705767	0.52	41	43	M
NorthernBobwhite_ScaffoldedDeNovo_contig_5265	gi|224381666|ref|NC_011462.1| TGU1	75.5	1816	293	41	40485	42221	2707071	2705329	0	1222	12446	M
NorthernBobwhite_ScaffoldedDeNovo_contig_214204	gi|224381666|ref|NC_011462.1| TGU1	66.77	325	92	7	30	348	2764559	2764873	8e-14	82	3	M
NorthernBobwhite_ScaffoldedDeNovo_contig_167672	gi|224381666|ref|NC_011462.1| TGU1	84.09	44	7	0	387	430	2770799	2770756	0.002	48	8	M
NorthernBobwhite_ScaffoldedDeNovo_contig_202980	gi|224381666|ref|NC_011462.1| TGU1	87.27	55	6	1	21	74	2770805	2770751	1e-08	64	23	M
NorthernBobwhite_ScaffoldedDeNovo_contig_199348	gi|224381666|ref|NC_011462.1| TGU1	86.84	38	5	0	17	54	2782692	2782729	0.005	46	2	S
NorthernBobwhite_ScaffoldedDeNovo_contig_185957	gi|224381666|ref|NC_011462.1| TGU1	85.37	41	4	2	4	43	2782935	2782896	0.19	41	22	M
NorthernBobwhite_ScaffoldedDeNovo_contig_109797	gi|224381666|ref|NC_011462.1| TGU1	100	24	0	0	330	353	2782962	2782939	0.015	44	2	S
NorthernBobwhite_ScaffoldedDeNovo_contig_80315	gi|224381666|ref|NC_011462.1| TGU1	92.86	28	2	0	258	285	2786507	2786534	0.05	42	2	S
NorthernBobwhite_ScaffoldedDeNovo_contig_9001	gi|224381666|ref|NC_011462.1| TGU1	73.43	892	148	23	2050	2892	2791062	2790211	5e-143	517	26618	M
NorthernBobwhite_ScaffoldedDeNovo_contig_34202	gi|224381666|ref|NC_011462.1| TGU1	78.02	919	154	14	733	1621	2791508	2792408	0	728	4420	M
NorthernBobwhite_ScaffoldedDeNovo_contig_91010	gi|224381666|ref|NC_011462.1| TGU1	75.88	481	106	6	3050	3525	2797823	2798298	9e-87	327	37	M
NorthernBobwhite_ScaffoldedDeNovo_contig_218438	gi|224381666|ref|NC_011462.1| TGU1	75.42	354	69	6	6	347	2800947	2800600	4e-60	235	6	M
NorthernBobwhite_ScaffoldedDeNovo_contig_17865	gi|224381666|ref|NC_011462.1| TGU1	75.21	1097	223	24	3822	4882	2804281	2803198	0	688	28	M
NorthernBobwhite_ScaffoldedDeNovo_contig_124139	gi|224381666|ref|NC_011462.1| TGU1	73.91	207	41	6	65	266	2808908	2809106	1e-23	114	4	M
NorthernBobwhite_ScaffoldedDeNovo_contig_116133	gi|224381666|ref|NC_011462.1| TGU1	96.55	29	1	0	114	142	2848097	2848125	0.002	48	32	M
NorthernBobwhite_ScaffoldedDeNovo_contig_96420	gi|224381666|ref|NC_011462.1| TGU1	72.15	553	109	13	22	556	2850556	2851081	6e-75	286	4	M
NorthernBobwhite_ScaffoldedDeNovo_contig_1109	gi|224381666|ref|NC_011462.1| TGU1	73.44	2127	433	43	39889	41932	2856590	2854513	0	1214	56214	M
NorthernBobwhite_ScaffoldedDeNovo_contig_188142	gi|224381666|ref|NC_011462.1| TGU1	84.32	236	32	3	17	251	2857852	2857621	2e-64	250	1	S
NorthernBobwhite_ScaffoldedDeNovo_contig_99519	gi|224381666|ref|NC_011462.1| TGU1	78.85	52	11	0	7	58	2891780	2891831	0.013	44	3	M
NorthernBobwhite_ScaffoldedDeNovo_contig_8658	gi|224381666|ref|NC_011462.1| TGU1	76.67	690	120	11	416	1079	2908010	2908684	2e-140	506	3319	M
NorthernBobwhite_ScaffoldedDeNovo_contig_80017	gi|224381666|ref|NC_011462.1| TGU1	100	25	0	0	1079	1103	2910720	2910744	0.014	46	2	M
NorthernBobwhite_ScaffoldedDeNovo_contig_153411	gi|224381666|ref|NC_011462.1| TGU1	88.89	36	3	1	63	98	2932909	2932875	0.026	44	2	M
NorthernBobwhite_ScaffoldedDeNovo_contig_218510	gi|224381666|ref|NC_011462.1| TGU1	85	40	6	0	96	135	2935667	2935706	0.01	46	4	M
NorthernBobwhite_ScaffoldedDeNovo_contig_100256	gi|224381666|ref|NC_011462.1| TGU1	93.33	30	2	0	1	30	2942219	2942190	0.006	46	4	M
NorthernBobwhite_ScaffoldedDeNovo_contig_25719	gi|224381666|ref|NC_011462.1| TGU1	72.16	1426	287	31	57227	58574	2949058	2950451	0	742	24894	M
NorthernBobwhite_ScaffoldedDeNovo_contig_4813	gi|224381666|ref|NC_011462.1| TGU1	70.09	1080	234	26	4602	5661	2962513	2961503	5e-125	455	16616	M
NorthernBobwhite_ScaffoldedDeNovo_contig_185702	gi|224381666|ref|NC_011462.1| TGU1	89.74	39	4	0	185	223	2975330	2975292	3e-05	53	5	M
NorthernBobwhite_ScaffoldedDeNovo_contig_160870	gi|224381666|ref|NC_011462.1| TGU1	76.03	146	25	6	413	556	2976601	2976738	2e-15	87	10	M
NorthernBobwhite_ScaffoldedDeNovo_contig_77918	gi|224381666|ref|NC_011462.1| TGU1	81.42	253	42	4	7	254	2981581	2981833	1e-58	232	2	S
NorthernBobwhite_ScaffoldedDeNovo_contig_58178	gi|224381666|ref|NC_011462.1| TGU1	68.08	636	128	13	16	633	2990970	2990392	2e-61	241	4	M
NorthernBobwhite_ScaffoldedDeNovo_contig_42	gi|224381666|ref|NC_011462.1| TGU1	72.73	99	27	0	718	816	2991199	2991101	7e-06	57	1	S
NorthernBobwhite_ScaffoldedDeNovo_contig_3226	gi|224381666|ref|NC_011462.1| TGU1	75.91	2848	491	55	12778	15540	2994814	2992077	0	1972	7561	M
NorthernBobwhite_ScaffoldedDeNovo_contig_182832	gi|224381666|ref|NC_011462.1| TGU1	76.3	173	34	2	67	232	2999191	2999363	5e-27	125	4	M
NorthernBobwhite_ScaffoldedDeNovo_contig_51536	gi|224381666|ref|NC_011462.1| TGU1	66.32	291	73	11	9	289	3006443	3006718	2e-06	57	24	M
NorthernBobwhite_ScaffoldedDeNovo_contig_32916	gi|224381666|ref|NC_011462.1| TGU1	68.31	2165	480	60	2191	4278	3014695	3012660	0	728	14	M
NorthernBobwhite_ScaffoldedDeNovo_contig_114626	gi|224381666|ref|NC_011462.1| TGU1	68.77	269	53	13	178	429	3014882	3015136	3e-12	77	2	S
NorthernBobwhite_ScaffoldedDeNovo_contig_79130	gi|224381666|ref|NC_011462.1| TGU1	71.88	256	39	8	48	276	3018532	3018781	2e-28	131	3	S
NorthernBobwhite_ScaffoldedDeNovo_contig_26020	gi|224381666|ref|NC_011462.1| TGU1	69.66	3062	661	86	658	3525	3021134	3024121	0	1187	1617	M
NorthernBobwhite_ScaffoldedDeNovo_contig_168048	gi|224381666|ref|NC_011462.1| TGU1	88.24	34	3	1	459	492	3021259	3021291	0.35	41	9	M
NorthernBobwhite_ScaffoldedDeNovo_contig_150542	gi|224381666|ref|NC_011462.1| TGU1	73.68	114	28	2	300	412	3031645	3031533	2e-08	64	1	S
NorthernBobwhite_ScaffoldedDeNovo_contig_25095	gi|224381666|ref|NC_011462.1| TGU1	87.8	41	3	2	259	298	3033412	3033373	0.044	44	1	S
NorthernBobwhite_ScaffoldedDeNovo_contig_172556	gi|224381666|ref|NC_011462.1| TGU1	70.93	1665	362	40	145	1757	3036727	3038321	0	751	8	M
NorthernBobwhite_ScaffoldedDeNovo_contig_98577	gi|224381666|ref|NC_011462.1| TGU1	80.43	46	9	0	606	651	3039154	3039109	0.1	42	1	S
NorthernBobwhite_ScaffoldedDeNovo_contig_213641	gi|224381666|ref|NC_011462.1| TGU1	84.62	52	5	2	292	340	3042081	3042132	0.0001	51	2	M
NorthernBobwhite_ScaffoldedDeNovo_contig_166471	gi|224381666|ref|NC_011462.1| TGU1	86.54	52	4	2	1	49	3042096	3042147	3e-06	57	94	M
NorthernBobwhite_ScaffoldedDeNovo_contig_63235	gi|224381666|ref|NC_011462.1| TGU1	74	200	51	1	280	479	3052850	3052652	8e-26	123	12	M
NorthernBobwhite_ScaffoldedDeNovo_contig_3954	gi|224381666|ref|NC_011462.1| TGU1	71.92	3590	659	83	8982	12447	3057501	3060865	0	1871	17499	M
NorthernBobwhite_ScaffoldedDeNovo_contig_172295	gi|224381666|ref|NC_011462.1| TGU1	80.83	120	18	2	49	163	3077042	3077161	6e-22	109	3858	M
NorthernBobwhite_ScaffoldedDeNovo_contig_210772	gi|224381666|ref|NC_011462.1| TGU1	82.28	79	13	1	4	82	3077067	3077144	3e-12	77	2499	M
NorthernBobwhite_ScaffoldedDeNovo_contig_214085	gi|224381666|ref|NC_011462.1| TGU1	83.54	79	12	1	4	82	3077067	3077144	2e-13	80	2642	M
NorthernBobwhite_ScaffoldedDeNovo_contig_209329	gi|224381666|ref|NC_011462.1| TGU1	71.91	89	24	1	2	89	3081784	3081696	0.071	44	1	S
NorthernBobwhite_ScaffoldedDeNovo_contig_157105	gi|224381666|ref|NC_011462.1| TGU1	89.67	271	26	2	87	356	3099157	3099426	2e-96	356	2	M
NorthernBobwhite_ScaffoldedDeNovo_contig_42083	gi|224381666|ref|NC_011462.1| TGU1	71.34	164	39	4	1	160	3100194	3100035	4e-11	73	10	M
NorthernBobwhite_ScaffoldedDeNovo_contig_57889	gi|224381666|ref|NC_011462.1| TGU1	74.05	655	134	14	3180	3820	3106331	3106963	5e-104	385	3547	M
NorthernBobwhite_ScaffoldedDeNovo_contig_92764	gi|224381666|ref|NC_011462.1| TGU1	70.87	230	55	3	37	258	3107289	3107064	1e-22	111	6	M
NorthernBobwhite_ScaffoldedDeNovo_contig_195343	gi|224381666|ref|NC_011462.1| TGU1	71.79	592	143	11	36	610	3108055	3107471	2e-75	288	8	M
NorthernBobwhite_ScaffoldedDeNovo_contig_177950	gi|224381666|ref|NC_011462.1| TGU1	96.43	28	1	0	5341	5368	3116311	3116338	0.07	46	1	S
NorthernBobwhite_ScaffoldedDeNovo_contig_8611	gi|224381666|ref|NC_011462.1| TGU1	79.58	1719	255	25	8722	10360	3127250	3125548	0	1492	23223	M
NorthernBobwhite_ScaffoldedDeNovo_contig_146620	gi|224381666|ref|NC_011462.1| TGU1	74.4	711	132	11	641	1339	3137987	3138659	3e-126	457	1697	M
NorthernBobwhite_ScaffoldedDeNovo_contig_20478	gi|224381666|ref|NC_011462.1| TGU1	77.7	1498	274	21	2968	4430	3140958	3142430	0	1155	8854	M
NorthernBobwhite_ScaffoldedDeNovo_contig_24140	gi|224381666|ref|NC_011462.1| TGU1	76.06	188	39	4	266	448	3171703	3171517	4e-26	123	3	S
NorthernBobwhite_ScaffoldedDeNovo_contig_106512	gi|224381666|ref|NC_011462.1| TGU1	73.45	501	76	11	4722	5170	3173223	3172728	5e-80	306	142	M
NorthernBobwhite_ScaffoldedDeNovo_contig_69144	gi|224381666|ref|NC_011462.1| TGU1	75.86	87	14	3	1619	1704	3177027	3177107	7e-05	55	83	M
NorthernBobwhite_ScaffoldedDeNovo_contig_128954	gi|224381666|ref|NC_011462.1| TGU1	75.81	62	15	0	150	211	3177030	3177091	0.038	44	1	S
NorthernBobwhite_ScaffoldedDeNovo_contig_167555	gi|224381666|ref|NC_011462.1| TGU1	86.96	46	6	0	2067	2112	3177088	3177043	2e-05	57	46	M
NorthernBobwhite_ScaffoldedDeNovo_contig_86115	gi|224381666|ref|NC_011462.1| TGU1	89.66	58	6	0	3729	3786	3177097	3177040	8e-12	78	182	M
NorthernBobwhite_ScaffoldedDeNovo_contig_129236	gi|224381666|ref|NC_011462.1| TGU1	83.75	80	13	0	327	406	3177103	3177024	3e-14	86	2748	M
NorthernBobwhite_ScaffoldedDeNovo_contig_129905	gi|224381666|ref|NC_011462.1| TGU1	77.14	70	16	0	1003	1072	3177103	3177034	3e-05	55	38	M
NorthernBobwhite_ScaffoldedDeNovo_contig_121905	gi|224381666|ref|NC_011462.1| TGU1	83.78	74	12	0	2238	2311	3177108	3177035	2e-12	80	46	M
NorthernBobwhite_ScaffoldedDeNovo_contig_210197	gi|224381666|ref|NC_011462.1| TGU1	88.57	35	3	1	2	35	3177142	3177108	0.071	42	1	S
NorthernBobwhite_ScaffoldedDeNovo_contig_140180	gi|224381666|ref|NC_011462.1| TGU1	80.27	441	68	6	1	428	3177948	3177514	1e-107	394	5	M
NorthernBobwhite_ScaffoldedDeNovo_contig_41183	gi|224381666|ref|NC_011462.1| TGU1	70.57	282	65	3	6	284	3178330	3178596	7e-31	138	3	M
NorthernBobwhite_ScaffoldedDeNovo_contig_194786	gi|224381666|ref|NC_011462.1| TGU1	83.78	37	6	0	247	283	3185187	3185151	0.16	41	39	M
NorthernBobwhite_ScaffoldedDeNovo_contig_97223	gi|224381666|ref|NC_011462.1| TGU1	73.02	808	167	14	77	840	3185483	3186283	2e-126	457	3	M
NorthernBobwhite_ScaffoldedDeNovo_contig_195209	gi|224381666|ref|NC_011462.1| TGU1	91.67	36	2	1	171	206	3188428	3188462	0.001	48	5	M
NorthernBobwhite_ScaffoldedDeNovo_contig_22963	gi|224381666|ref|NC_011462.1| TGU1	85.37	41	5	1	21413	21452	3190383	3190343	1.1	44.6	10	M
NorthernBobwhite_ScaffoldedDeNovo_contig_681	gi|224381666|ref|NC_011462.1| TGU1	75	1304	229	30	17217	18488	3192923	3191685	0	834	11649	M
NorthernBobwhite_ScaffoldedDeNovo_contig_206125	gi|224381666|ref|NC_011462.1| TGU1	68.22	236	53	7	120	334	3201726	3201492	2e-12	77	1	S
NorthernBobwhite_ScaffoldedDeNovo_contig_76832	gi|224381666|ref|NC_011462.1| TGU1	67.8	236	54	7	110	324	3201726	3201492	1e-10	71	1	S
NorthernBobwhite_ScaffoldedDeNovo_contig_107431	gi|224381666|ref|NC_011462.1| TGU1	74.6	504	71	7	62	525	3219457	3218971	4e-95	352	13	M
NorthernBobwhite_ScaffoldedDeNovo_contig_115806	gi|224381666|ref|NC_011462.1| TGU1	67.7	1102	297	26	5	1080	3221398	3220330	1e-84	318	7	M
NorthernBobwhite_ScaffoldedDeNovo_contig_102423	gi|224381666|ref|NC_011462.1| TGU1	81.63	49	9	0	367	415	3221425	3221377	0.001	48	3	M
NorthernBobwhite_ScaffoldedDeNovo_contig_150489	gi|224381666|ref|NC_011462.1| TGU1	83.67	49	8	0	285	333	3221425	3221377	3e-05	53	1	S
NorthernBobwhite_ScaffoldedDeNovo_contig_59067	gi|224381666|ref|NC_011462.1| TGU1	74.66	671	122	18	2165	2800	3222434	3221777	2e-110	407	823	M
NorthernBobwhite_ScaffoldedDeNovo_contig_27804	gi|224381666|ref|NC_011462.1| TGU1	71.04	2562	516	63	2391	4805	3227873	3230355	0	1195	10	M
NorthernBobwhite_ScaffoldedDeNovo_contig_111816	gi|224381666|ref|NC_011462.1| TGU1	80	45	7	1	130	174	3231688	3231730	0.87	39.2	7	M
NorthernBobwhite_ScaffoldedDeNovo_contig_172892	gi|224381666|ref|NC_011462.1| TGU1	70.34	290	53	10	109	393	3232626	3232887	3e-25	120	2	M
NorthernBobwhite_ScaffoldedDeNovo_contig_5144	gi|224381666|ref|NC_011462.1| TGU1	70.13	2367	468	59	6945	9193	3238819	3236574	0	1031	85	M
NorthernBobwhite_ScaffoldedDeNovo_contig_145191	gi|224381666|ref|NC_011462.1| TGU1	73.58	299	69	6	178	472	3240730	3241022	2e-38	165	2	S
NorthernBobwhite_ScaffoldedDeNovo_contig_156796	gi|224381666|ref|NC_011462.1| TGU1	91.89	37	1	2	143	177	3247860	3247896	0.004	46	14	M
NorthernBobwhite_ScaffoldedDeNovo_contig_76984	gi|224381666|ref|NC_011462.1| TGU1	93.94	33	1	1	327	358	3247897	3247865	0.002	48	11	M
NorthernBobwhite_ScaffoldedDeNovo_contig_55345	gi|224381666|ref|NC_011462.1| TGU1	67.6	642	146	22	1046	1682	3247898	3248482	8e-42	178	24	M
NorthernBobwhite_ScaffoldedDeNovo_contig_93633	gi|224381666|ref|NC_011462.1| TGU1	86.89	61	7	1	141	201	3247952	3247893	2e-10	71	496	M
NorthernBobwhite_ScaffoldedDeNovo_contig_180054	gi|224381666|ref|NC_011462.1| TGU1	68.17	597	125	31	432	1004	3247964	3248519	1e-30	140	32	M
NorthernBobwhite_ScaffoldedDeNovo_contig_37132	gi|224381666|ref|NC_011462.1| TGU1	67.21	488	114	18	2739	3221	3248074	3248520	1e-23	120	93	M
NorthernBobwhite_ScaffoldedDeNovo_contig_72690	gi|224381666|ref|NC_011462.1| TGU1	65.81	389	108	11	948	1334	3248101	3248466	8e-11	75	109	M
NorthernBobwhite_ScaffoldedDeNovo_contig_203924	gi|224381666|ref|NC_011462.1| TGU1	64.91	285	82	4	141	425	3248120	3248386	7e-08	62	2	M
NorthernBobwhite_ScaffoldedDeNovo_contig_26865	gi|224381666|ref|NC_011462.1| TGU1	78.04	255	45	7	14135	14384	3248124	3248372	1e-43	187	49	M
NorthernBobwhite_ScaffoldedDeNovo_contig_91616	gi|224381666|ref|NC_011462.1| TGU1	76.07	163	34	4	4708	4867	3248124	3248284	2e-19	105	202	M
NorthernBobwhite_ScaffoldedDeNovo_contig_49136	gi|224381666|ref|NC_011462.1| TGU1	78.31	83	16	1	44413	44495	3248266	3248346	6e-07	66	101	M
NorthernBobwhite_ScaffoldedDeNovo_contig_36471	gi|224381666|ref|NC_011462.1| TGU1	79.82	114	21	2	438	551	3248286	3248397	5e-16	95	3529	M
NorthernBobwhite_ScaffoldedDeNovo_contig_87115	gi|224381666|ref|NC_011462.1| TGU1	77.57	107	19	1	9766	9872	3248295	3248396	2e-13	86	61	M
NorthernBobwhite_ScaffoldedDeNovo_contig_65447	gi|224381666|ref|NC_011462.1| TGU1	75.35	361	80	6	6	359	3248300	3247942	1e-57	232	18	M
NorthernBobwhite_ScaffoldedDeNovo_contig_114914	gi|224381666|ref|NC_011462.1| TGU1	68.52	216	62	4	270	483	3248302	3248513	2e-09	71	66	M
NorthernBobwhite_ScaffoldedDeNovo_contig_196132	gi|224381666|ref|NC_011462.1| TGU1	66.27	332	73	12	1	326	3248340	3248042	9e-12	75	24	M
NorthernBobwhite_ScaffoldedDeNovo_contig_126604	gi|224381666|ref|NC_011462.1| TGU1	75.38	195	42	3	969	1157	3248356	3248162	6e-27	127	166	M
NorthernBobwhite_ScaffoldedDeNovo_contig_214949	gi|224381666|ref|NC_011462.1| TGU1	88.24	34	4	0	24	57	3248362	3248395	0.013	44	1	S
NorthernBobwhite_ScaffoldedDeNovo_contig_218587	gi|224381666|ref|NC_011462.1| TGU1	70.19	161	32	6	376	534	3248380	3248234	9e-08	62	38	M
NorthernBobwhite_ScaffoldedDeNovo_contig_155826	gi|224381666|ref|NC_011462.1| TGU1	77.01	87	16	3	424	509	3248401	3248318	6e-06	57	38	M
NorthernBobwhite_ScaffoldedDeNovo_contig_133507	gi|224381666|ref|NC_011462.1| TGU1	77.8	419	75	6	929	1333	3248405	3247991	6e-86	325	85	M
NorthernBobwhite_ScaffoldedDeNovo_contig_1139	gi|224381666|ref|NC_011462.1| TGU1	79.65	172	25	7	5202	5368	3248408	3248242	2e-26	131	177	M
NorthernBobwhite_ScaffoldedDeNovo_contig_219217	gi|224381666|ref|NC_011462.1| TGU1	71.95	82	23	0	60	141	3248417	3248498	0.014	44	1	S
NorthernBobwhite_ScaffoldedDeNovo_contig_112799	gi|224381666|ref|NC_011462.1| TGU1	66.11	357	86	12	3482	3834	3248453	3248128	6e-11	77	9	M
NorthernBobwhite_ScaffoldedDeNovo_contig_73183	gi|224381666|ref|NC_011462.1| TGU1	75.62	361	65	9	8	368	3248480	3248143	1e-59	235	78	M
NorthernBobwhite_ScaffoldedDeNovo_contig_183120	gi|224381666|ref|NC_011462.1| TGU1	74.4	457	91	16	757	1203	3248484	3248044	5e-63	248	17	M
NorthernBobwhite_ScaffoldedDeNovo_contig_193548	gi|224381666|ref|NC_011462.1| TGU1	70.18	456	94	11	196	648	3248488	3248072	2e-48	197	146	M
NorthernBobwhite_ScaffoldedDeNovo_contig_102256	gi|224381666|ref|NC_011462.1| TGU1	75.48	420	83	10	1977	2387	3248514	3248106	2e-68	266	184	M
NorthernBobwhite_ScaffoldedDeNovo_contig_75909	gi|224381666|ref|NC_011462.1| TGU1	67.08	401	124	4	10342	10738	3248520	3248124	5e-23	118	32	M
NorthernBobwhite_ScaffoldedDeNovo_contig_121154	gi|224381666|ref|NC_011462.1| TGU1	66.84	389	94	9	306	686	3248522	3248161	1e-21	111	11	M
NorthernBobwhite_ScaffoldedDeNovo_contig_139065	gi|224381666|ref|NC_011462.1| TGU1	67.8	615	161	23	35	638	3248522	3247934	1e-32	147	3	M
NorthernBobwhite_ScaffoldedDeNovo_contig_51567	gi|224381666|ref|NC_011462.1| TGU1	69.38	356	91	7	1	344	3267831	3268180	3e-30	136	170	M
NorthernBobwhite_ScaffoldedDeNovo_contig_82768	gi|224381666|ref|NC_011462.1| TGU1	75.13	382	89	4	1	379	3268223	3267845	7e-64	248	536	M
NorthernBobwhite_ScaffoldedDeNovo_contig_12733	gi|224381666|ref|NC_011462.1| TGU1	72.41	511	117	4	10368	10856	3268914	3269422	1e-74	289	11172	M
NorthernBobwhite_ScaffoldedDeNovo_contig_134113	gi|224381666|ref|NC_011462.1| TGU1	84.62	39	6	0	68	106	3273558	3273596	0.016	44	1	S
NorthernBobwhite_ScaffoldedDeNovo_contig_205581	gi|224381666|ref|NC_011462.1| TGU1	85.19	54	6	1	221	272	3286802	3286749	6e-07	59	2	M
NorthernBobwhite_ScaffoldedDeNovo_contig_30915	gi|224381666|ref|NC_011462.1| TGU1	70.92	1300	256	34	16100	17328	3311916	3310668	2e-167	598	12952	M
NorthernBobwhite_ScaffoldedDeNovo_contig_55774	gi|224381666|ref|NC_011462.1| TGU1	87.88	33	3	1	42	73	3316814	3316846	0.62	39.2	36	M
NorthernBobwhite_ScaffoldedDeNovo_contig_145679	gi|224381666|ref|NC_011462.1| TGU1	90.62	32	3	0	146	177	3342284	3342253	0.014	44	4	M
NorthernBobwhite_ScaffoldedDeNovo_contig_145678	gi|224381666|ref|NC_011462.1| TGU1	90.62	32	3	0	140	171	3342284	3342253	0.014	44	3	M
NorthernBobwhite_ScaffoldedDeNovo_contig_89350	gi|224381666|ref|NC_011462.1| TGU1	81.51	806	124	15	5193	5982	3394422	3393626	0	737	9	M
NorthernBobwhite_ScaffoldedDeNovo_contig_48302	gi|224381666|ref|NC_011462.1| TGU1	73.27	823	149	19	1202	1997	3397595	3396817	3e-130	471	5	S
NorthernBobwhite_ScaffoldedDeNovo_contig_96571	gi|224381666|ref|NC_011462.1| TGU1	74.68	387	83	6	38	417	3408226	3407848	8e-62	242	482	M
NorthernBobwhite_ScaffoldedDeNovo_contig_89467	gi|224381666|ref|NC_011462.1| TGU1	71.33	865	168	26	1480	2301	3423717	3422890	5e-108	398	13	M
NorthernBobwhite_ScaffoldedDeNovo_contig_128828	gi|224381666|ref|NC_011462.1| TGU1	96.3	27	1	0	241	267	3428357	3428383	0.015	44	2	M
NorthernBobwhite_ScaffoldedDeNovo_contig_13262	gi|224381666|ref|NC_011462.1| TGU1	71.07	2399	450	58	13098	15393	3429803	3432060	0	1157	11271	M
NorthernBobwhite_ScaffoldedDeNovo_contig_145441	gi|224381666|ref|NC_011462.1| TGU1	72.22	234	44	5	7	233	3432054	3432273	6e-27	125	15	M
NorthernBobwhite_ScaffoldedDeNovo_contig_188302	gi|224381666|ref|NC_011462.1| TGU1	71.79	234	45	5	143	369	3432273	3432054	7e-26	122	57	M
NorthernBobwhite_ScaffoldedDeNovo_contig_72881	gi|224381666|ref|NC_011462.1| TGU1	74.14	116	28	2	137	251	3439198	3439084	4e-09	68	26	M
NorthernBobwhite_ScaffoldedDeNovo_contig_215538	gi|224381666|ref|NC_011462.1| TGU1	100	26	0	0	201	226	3447399	3447424	0.001	48	8	M
NorthernBobwhite_ScaffoldedDeNovo_contig_62034	gi|224381666|ref|NC_011462.1| TGU1	87.5	32	4	0	269	300	3447441	3447472	0.22	41	51	M
NorthernBobwhite_ScaffoldedDeNovo_contig_30117	gi|224381666|ref|NC_011462.1| TGU1	83.86	285	37	6	877	1156	3459317	3459037	4e-75	288	9476	M
NorthernBobwhite_ScaffoldedDeNovo_contig_28519	gi|224381666|ref|NC_011462.1| TGU1	66.68	3292	750	97	5911	9034	3476974	3473862	0	866	6692	M
NorthernBobwhite_ScaffoldedDeNovo_contig_21190	gi|224381666|ref|NC_011462.1| TGU1	73.8	2668	510	57	1386	3971	3491969	3494529	0	1573	500	M
NorthernBobwhite_ScaffoldedDeNovo_contig_141401	gi|224381666|ref|NC_011462.1| TGU1	67.32	612	140	20	1	598	3495256	3494691	4e-39	167	3	M
NorthernBobwhite_ScaffoldedDeNovo_contig_48792	gi|224381666|ref|NC_011462.1| TGU1	68.37	607	137	15	8	569	3514280	3514876	9e-53	212	60	M
NorthernBobwhite_ScaffoldedDeNovo_contig_125736	gi|224381666|ref|NC_011462.1| TGU1	85.64	362	42	1	30	381	3516258	3515897	2e-116	423	2	S
NorthernBobwhite_ScaffoldedDeNovo_contig_129873	gi|224381666|ref|NC_011462.1| TGU1	68.75	144	40	3	22	164	3516925	3516786	0.001	48	2	M
NorthernBobwhite_ScaffoldedDeNovo_contig_125407	gi|224381666|ref|NC_011462.1| TGU1	68.71	310	61	11	63	357	3519134	3518846	5e-21	105	1	S
NorthernBobwhite_ScaffoldedDeNovo_contig_45467	gi|224381666|ref|NC_011462.1| TGU1	75.91	137	29	1	2	134	3520010	3520146	1e-18	98	2	M
NorthernBobwhite_ScaffoldedDeNovo_contig_107172	gi|224381666|ref|NC_011462.1| TGU1	70.21	188	45	7	386	568	3522285	3522466	8e-08	66	2	M
NorthernBobwhite_ScaffoldedDeNovo_contig_68914	gi|224381666|ref|NC_011462.1| TGU1	74.81	266	43	10	78	326	3522714	3522456	1e-35	154	1	S
NorthernBobwhite_ScaffoldedDeNovo_contig_196453	gi|224381666|ref|NC_011462.1| TGU1	84.25	146	18	2	162	302	3525673	3525818	4e-36	156	7	M
NorthernBobwhite_ScaffoldedDeNovo_contig_70738	gi|224381666|ref|NC_011462.1| TGU1	66.91	272	65	6	430	695	3535106	3535358	5e-13	80	123	M
NorthernBobwhite_ScaffoldedDeNovo_contig_114182	gi|224381666|ref|NC_011462.1| TGU1	73.06	193	44	5	154	339	3535704	3535895	7e-19	98	4	M
NorthernBobwhite_ScaffoldedDeNovo_contig_114181	gi|224381666|ref|NC_011462.1| TGU1	73.58	193	43	5	154	339	3535704	3535895	2e-20	104	5	M
NorthernBobwhite_ScaffoldedDeNovo_contig_116781	gi|224381666|ref|NC_011462.1| TGU1	86.49	74	10	0	185	258	3538988	3538915	7e-16	89	5	M
NorthernBobwhite_ScaffoldedDeNovo_contig_170226	gi|224381666|ref|NC_011462.1| TGU1	79.21	101	17	1	185	281	3538988	3538888	3e-15	87	5	M
NorthernBobwhite_ScaffoldedDeNovo_contig_27616	gi|224381666|ref|NC_011462.1| TGU1	73.25	714	137	14	4846	5537	3539869	3539188	6e-112	412	13	M
NorthernBobwhite_ScaffoldedDeNovo_contig_180142	gi|224381666|ref|NC_011462.1| TGU1	96.15	26	1	0	149	174	3543293	3543318	0.057	42	1	S
NorthernBobwhite_ScaffoldedDeNovo_contig_99379	gi|224381666|ref|NC_011462.1| TGU1	87.88	33	4	0	553	585	3546767	3546735	0.1	42.8	48	M
NorthernBobwhite_ScaffoldedDeNovo_contig_135419	gi|224381666|ref|NC_011462.1| TGU1	71.24	591	97	19	201	768	3547326	3546786	3e-73	280	2	M
NorthernBobwhite_ScaffoldedDeNovo_contig_166192	gi|224381666|ref|NC_011462.1| TGU1	73.39	248	48	7	1	235	3555829	3556071	1e-29	134	1	S
NorthernBobwhite_ScaffoldedDeNovo_contig_166191	gi|224381666|ref|NC_011462.1| TGU1	73.09	249	47	8	119	353	3556071	3555829	5e-28	129	1	S
NorthernBobwhite_ScaffoldedDeNovo_contig_18669	gi|224381666|ref|NC_011462.1| TGU1	72.41	830	168	15	7349	8149	3561213	3560416	2e-123	452	10938	M
NorthernBobwhite_ScaffoldedDeNovo_contig_20825	gi|224381666|ref|NC_011462.1| TGU1	73.44	128	28	4	976	1098	3568171	3568045	4e-08	66	4	M
NorthernBobwhite_ScaffoldedDeNovo_contig_20826	gi|224381666|ref|NC_011462.1| TGU1	66.07	280	74	7	54	316	3569262	3568987	2e-08	64	2	M
NorthernBobwhite_ScaffoldedDeNovo_contig_142954	gi|224381666|ref|NC_011462.1| TGU1	78.91	147	30	1	476	621	3573573	3573719	1e-25	122	2	S
NorthernBobwhite_ScaffoldedDeNovo_contig_128878	gi|224381666|ref|NC_011462.1| TGU1	86.67	45	3	3	149	191	3579091	3579048	0.013	44	2	M
NorthernBobwhite_ScaffoldedDeNovo_contig_36655	gi|224381666|ref|NC_011462.1| TGU1	82.96	5380	786	45	13172	18500	3587778	3593077	0	5483	32065	M
NorthernBobwhite_ScaffoldedDeNovo_contig_131168	gi|224381666|ref|NC_011462.1| TGU1	95.83	24	1	0	6	29	3589988	3589965	0.54	39.2	7	M
NorthernBobwhite_ScaffoldedDeNovo_contig_60336	gi|224381666|ref|NC_011462.1| TGU1	70.06	157	31	4	20	166	3598232	3598382	2e-09	68	9	M
NorthernBobwhite_ScaffoldedDeNovo_contig_34216	gi|224381666|ref|NC_011462.1| TGU1	73.1	145	38	1	402	546	3599506	3599649	1e-12	82	7	M
NorthernBobwhite_ScaffoldedDeNovo_contig_123173	gi|224381666|ref|NC_011462.1| TGU1	73	100	24	2	268	365	3601208	3601306	4e-05	53	5	M
NorthernBobwhite_ScaffoldedDeNovo_contig_218199	gi|224381666|ref|NC_011462.1| TGU1	78.69	61	6	3	695	753	3603930	3603875	0.04	44	1	S
NorthernBobwhite_ScaffoldedDeNovo_contig_7462	gi|224381666|ref|NC_011462.1| TGU1	70.56	2174	456	60	40585	42667	3614672	3612592	0	931	19265	M
NorthernBobwhite_ScaffoldedDeNovo_contig_57706	gi|224381666|ref|NC_011462.1| TGU1	76.92	65	14	1	110	173	3616119	3616183	0.011	46	1	S
NorthernBobwhite_ScaffoldedDeNovo_contig_175682	gi|224381666|ref|NC_011462.1| TGU1	85.71	35	5	0	106	140	3620821	3620787	0.18	41	31	M
NorthernBobwhite_ScaffoldedDeNovo_contig_18668	gi|224381666|ref|NC_011462.1| TGU1	71	269	66	8	31	289	3627540	3627806	7e-21	109	3	M
NorthernBobwhite_ScaffoldedDeNovo_contig_48963	gi|224381666|ref|NC_011462.1| TGU1	90.91	33	3	0	200	232	3643906	3643938	0.005	46	2	S
NorthernBobwhite_ScaffoldedDeNovo_contig_39592	gi|224381666|ref|NC_011462.1| TGU1	71.59	887	191	15	16	882	3659133	3658288	8e-125	452	2	S
NorthernBobwhite_ScaffoldedDeNovo_contig_147487	gi|224381666|ref|NC_011462.1| TGU1	86.84	38	3	1	254	291	3659524	3659559	0.015	44	2	S
NorthernBobwhite_ScaffoldedDeNovo_contig_179475	gi|224381666|ref|NC_011462.1| TGU1	84.09	44	7	0	287	330	3688321	3688278	0.001	48	16	M
NorthernBobwhite_ScaffoldedDeNovo_contig_212487	gi|224381666|ref|NC_011462.1| TGU1	82.93	41	7	0	343	383	3688326	3688286	0.062	42	1	S
NorthernBobwhite_ScaffoldedDeNovo_contig_85140	gi|224381666|ref|NC_011462.1| TGU1	92.86	28	2	0	31	58	3690468	3690495	0.054	42	1	S
NorthernBobwhite_ScaffoldedDeNovo_contig_121326	gi|224381666|ref|NC_011462.1| TGU1	67.25	748	163	24	24	709	3694032	3694759	4e-52	210	1	S
NorthernBobwhite_ScaffoldedDeNovo_contig_94068	gi|224381666|ref|NC_011462.1| TGU1	72.86	199	43	4	88	277	3695217	3695413	2e-21	107	8	M
NorthernBobwhite_ScaffoldedDeNovo_contig_100592	gi|224381666|ref|NC_011462.1| TGU1	86.67	75	9	1	134	207	3695723	3695649	1e-15	87	6765	M
NorthernBobwhite_ScaffoldedDeNovo_contig_32937	gi|224381666|ref|NC_011462.1| TGU1	85.92	71	10	0	822	892	3695723	3695653	5e-14	84	3835	M
NorthernBobwhite_ScaffoldedDeNovo_contig_103808	gi|224381666|ref|NC_011462.1| TGU1	86.89	61	8	0	138	198	3695729	3695669	7e-12	75	3327	M
NorthernBobwhite_ScaffoldedDeNovo_contig_90391	gi|224381666|ref|NC_011462.1| TGU1	86.89	61	8	0	140	200	3695729	3695669	7e-12	75	2621	M
NorthernBobwhite_ScaffoldedDeNovo_contig_58995	gi|224381666|ref|NC_011462.1| TGU1	72.31	1022	222	20	145	1133	3696789	3697782	4e-149	533	955	M
NorthernBobwhite_ScaffoldedDeNovo_contig_186880	gi|224381666|ref|NC_011462.1| TGU1	69.79	513	119	15	6	489	3697216	3697721	7e-47	192	2	M
NorthernBobwhite_ScaffoldedDeNovo_contig_138865	gi|224381666|ref|NC_011462.1| TGU1	69.21	799	177	15	25	778	3708803	3709577	3e-87	327	4431	M
NorthernBobwhite_ScaffoldedDeNovo_contig_102568	gi|224381666|ref|NC_011462.1| TGU1	69.74	152	39	4	13	162	3712750	3712604	1e-05	55	2	S
NorthernBobwhite_ScaffoldedDeNovo_contig_13404	gi|224381666|ref|NC_011462.1| TGU1	75.57	393	84	6	3945	4337	3714477	3714857	2e-66	260	190	M
NorthernBobwhite_ScaffoldedDeNovo_contig_98498	gi|224381666|ref|NC_011462.1| TGU1	85.71	77	11	0	225	301	3721264	3721340	5e-16	89	7917	M
NorthernBobwhite_ScaffoldedDeNovo_contig_66409	gi|224381666|ref|NC_011462.1| TGU1	67.17	396	93	13	192	575	3730254	3730624	6e-20	104	5	M
NorthernBobwhite_ScaffoldedDeNovo_contig_28035	gi|224381666|ref|NC_011462.1| TGU1	65.72	1164	298	36	2172	3284	3745927	3744814	9e-57	230	625	M
NorthernBobwhite_ScaffoldedDeNovo_contig_143465	gi|224381666|ref|NC_011462.1| TGU1	68.17	355	101	5	37	387	3753479	3753133	3e-25	120	7	M
NorthernBobwhite_ScaffoldedDeNovo_contig_196830	gi|224381666|ref|NC_011462.1| TGU1	71.43	182	50	2	272	452	3769527	3769347	2e-15	87	4	M
NorthernBobwhite_ScaffoldedDeNovo_contig_200809	gi|224381666|ref|NC_011462.1| TGU1	88.1	42	3	2	3	44	3809585	3809546	0.004	46	6	M
NorthernBobwhite_ScaffoldedDeNovo_contig_106645	gi|224381666|ref|NC_011462.1| TGU1	63.99	572	157	19	14	556	3817893	3818444	9e-08	62	1	S
NorthernBobwhite_ScaffoldedDeNovo_contig_92941	gi|224381666|ref|NC_011462.1| TGU1	92.31	26	2	0	106	131	3817894	3817869	0.77	39.2	27	M
NorthernBobwhite_ScaffoldedDeNovo_contig_171181	gi|224381666|ref|NC_011462.1| TGU1	88.89	36	4	0	577	612	3822731	3822766	0.002	48	3	M
NorthernBobwhite_ScaffoldedDeNovo_contig_64228	gi|224381666|ref|NC_011462.1| TGU1	71.21	264	56	8	151	410	3822820	3822573	4e-24	116	27	M
NorthernBobwhite_ScaffoldedDeNovo_contig_26426	gi|224381666|ref|NC_011462.1| TGU1	70.03	1965	452	43	529	2452	3825001	3823133	0	818	49975	M
NorthernBobwhite_ScaffoldedDeNovo_contig_37873	gi|224381666|ref|NC_011462.1| TGU1	69.69	3151	622	73	12863	15894	3843303	3840367	0	1348	3361	M
NorthernBobwhite_ScaffoldedDeNovo_contig_160881	gi|224381666|ref|NC_011462.1| TGU1	89.19	37	4	0	241	277	3845076	3845040	0.0005	50	2	M
NorthernBobwhite_ScaffoldedDeNovo_contig_131905	gi|224381666|ref|NC_011462.1| TGU1	90.91	33	3	0	81	113	3855411	3855443	0.004	46	6	M
NorthernBobwhite_ScaffoldedDeNovo_contig_73723	gi|224381666|ref|NC_011462.1| TGU1	75.71	140	33	1	4	143	3862236	3862374	3e-18	96	2280	M
NorthernBobwhite_ScaffoldedDeNovo_contig_13681	gi|224381666|ref|NC_011462.1| TGU1	70.18	1848	388	43	30843	32597	3891425	3889648	0	801	34727	M
NorthernBobwhite_ScaffoldedDeNovo_contig_173092	gi|224381666|ref|NC_011462.1| TGU1	74	150	38	1	46	194	3895313	3895462	4e-16	91	17	M
NorthernBobwhite_ScaffoldedDeNovo_contig_117403	gi|224381666|ref|NC_011462.1| TGU1	78.35	194	35	4	34	220	3907442	3907249	4e-34	149	15348	M
NorthernBobwhite_ScaffoldedDeNovo_contig_121223	gi|224381666|ref|NC_011462.1| TGU1	65.76	768	202	21	76	822	3911917	3912644	7e-37	159	2	M
NorthernBobwhite_ScaffoldedDeNovo_contig_120773	gi|224381666|ref|NC_011462.1| TGU1	80.3	66	13	0	5193	5258	3913301	3913366	3e-06	60	1	S
NorthernBobwhite_ScaffoldedDeNovo_contig_161054	gi|224381666|ref|NC_011462.1| TGU1	87.88	33	4	0	271	303	3918937	3918969	0.062	42	2	S
NorthernBobwhite_ScaffoldedDeNovo_contig_110185	gi|224381666|ref|NC_011462.1| TGU1	81.82	44	5	1	32	75	3919001	3918961	0.047	42	1	S
NorthernBobwhite_ScaffoldedDeNovo_contig_102863	gi|224381666|ref|NC_011462.1| TGU1	68.67	415	99	13	1	402	3936019	3935623	4e-29	132	1	S
NorthernBobwhite_ScaffoldedDeNovo_contig_18053	gi|224381666|ref|NC_011462.1| TGU1	70.63	126	22	4	483	600	3936116	3935998	4e-06	57	1	S
NorthernBobwhite_ScaffoldedDeNovo_contig_195015	gi|224381666|ref|NC_011462.1| TGU1	87.88	33	4	0	417	449	3941221	3941253	0.084	42	2	S
NorthernBobwhite_ScaffoldedDeNovo_contig_59776	gi|224381666|ref|NC_011462.1| TGU1	73.97	365	85	5	497	859	3951588	3951944	4e-54	217	3090	M
NorthernBobwhite_ScaffoldedDeNovo_contig_105511	gi|224381666|ref|NC_011462.1| TGU1	96.3	27	1	0	61	87	3951898	3951924	0.02	44	1	S
NorthernBobwhite_ScaffoldedDeNovo_contig_208864	gi|224381666|ref|NC_011462.1| TGU1	86.96	46	4	1	648	693	3964951	3964994	6e-05	53	19	M
NorthernBobwhite_ScaffoldedDeNovo_contig_135587	gi|224381666|ref|NC_011462.1| TGU1	81.63	49	9	0	413	461	3964957	3965005	0.002	48	21	M
NorthernBobwhite_ScaffoldedDeNovo_contig_78073	gi|224381666|ref|NC_011462.1| TGU1	86.36	44	6	0	1	44	3964957	3965000	5e-05	53	4	M
NorthernBobwhite_ScaffoldedDeNovo_contig_97840	gi|224381666|ref|NC_011462.1| TGU1	92.31	39	3	0	4348	4386	3964957	3964995	8e-05	57	15	M
NorthernBobwhite_ScaffoldedDeNovo_contig_148590	gi|224381666|ref|NC_011462.1| TGU1	76.06	71	14	2	486	554	3964964	3965033	0.02	46	1	S
NorthernBobwhite_ScaffoldedDeNovo_contig_12825	gi|224381666|ref|NC_011462.1| TGU1	81.82	44	6	1	376	419	3964968	3965009	0.22	41	39	M
NorthernBobwhite_ScaffoldedDeNovo_contig_59911	gi|224381666|ref|NC_011462.1| TGU1	85.71	49	6	1	1	48	3964994	3964946	3e-05	53	12	M
NorthernBobwhite_ScaffoldedDeNovo_contig_10857	gi|224381666|ref|NC_011462.1| TGU1	92.5	40	3	0	4504	4543	3964997	3964958	4e-05	59	39	M
NorthernBobwhite_ScaffoldedDeNovo_contig_93586	gi|224381666|ref|NC_011462.1| TGU1	86.49	37	5	0	367	403	3964998	3964962	0.033	44	1	S
NorthernBobwhite_ScaffoldedDeNovo_contig_107700	gi|224381666|ref|NC_011462.1| TGU1	94.87	39	2	0	1304	1342	3965008	3964970	6e-07	62	14	M
NorthernBobwhite_ScaffoldedDeNovo_contig_180256	gi|224381666|ref|NC_011462.1| TGU1	75	76	14	1	2466	2541	3965010	3964940	0.0008	51	6	M
NorthernBobwhite_ScaffoldedDeNovo_contig_216371	gi|224381666|ref|NC_011462.1| TGU1	82.46	57	8	2	66	120	3965010	3964954	0.0002	51	16	M
NorthernBobwhite_ScaffoldedDeNovo_contig_216332	gi|224381666|ref|NC_011462.1| TGU1	82.46	57	9	1	3	58	3965011	3964955	8e-06	55	27	M
NorthernBobwhite_ScaffoldedDeNovo_contig_74568	gi|224381666|ref|NC_011462.1| TGU1	72.37	228	42	5	51	273	3969242	3969453	8e-26	123	3	S
NorthernBobwhite_ScaffoldedDeNovo_contig_76025	gi|224381666|ref|NC_011462.1| TGU1	86.36	44	5	1	516	558	3983858	3983901	0.0008	50	10	M
NorthernBobwhite_ScaffoldedDeNovo_contig_6397	gi|224381666|ref|NC_011462.1| TGU1	70.19	2080	410	61	45565	47594	3998901	3996982	0	870	67917	M
NorthernBobwhite_ScaffoldedDeNovo_contig_108224	gi|224381666|ref|NC_011462.1| TGU1	74.63	410	81	4	2	388	4003644	4003235	2e-71	273	3	M
NorthernBobwhite_ScaffoldedDeNovo_contig_199032	gi|224381666|ref|NC_011462.1| TGU1	90	30	3	0	124	153	4004483	4004454	0.16	41	37	M
NorthernBobwhite_ScaffoldedDeNovo_contig_139371	gi|224381666|ref|NC_011462.1| TGU1	74.27	482	109	7	229	703	4006975	4006502	4e-77	293	1	S
NorthernBobwhite_ScaffoldedDeNovo_contig_123282	gi|224381666|ref|NC_011462.1| TGU1	96.3	27	1	0	438	464	4013049	4013023	0.023	44	1	S
NorthernBobwhite_ScaffoldedDeNovo_contig_216595	gi|224381666|ref|NC_011462.1| TGU1	76.12	134	28	3	286	418	4021652	4021782	2e-15	87	3991	M
NorthernBobwhite_ScaffoldedDeNovo_contig_75255	gi|224381666|ref|NC_011462.1| TGU1	77.21	136	23	6	286	418	4021652	4021782	6e-15	86	2122	M
NorthernBobwhite_ScaffoldedDeNovo_contig_41861	gi|224381666|ref|NC_011462.1| TGU1	64.98	454	110	14	161	611	4029338	4028931	3e-14	84	158	M
NorthernBobwhite_ScaffoldedDeNovo_contig_41862	gi|224381666|ref|NC_011462.1| TGU1	64.92	459	102	14	161	611	4029338	4028931	6e-17	93	126	M
NorthernBobwhite_ScaffoldedDeNovo_contig_131717	gi|224381666|ref|NC_011462.1| TGU1	90.62	32	3	0	62	93	4052036	4052067	0.016	44	2	M
NorthernBobwhite_ScaffoldedDeNovo_contig_186421	gi|224381666|ref|NC_011462.1| TGU1	87.1	124	16	0	51	174	4055667	4055544	4e-35	152	3	M
NorthernBobwhite_ScaffoldedDeNovo_contig_5445	gi|224381666|ref|NC_011462.1| TGU1	70	2897	608	72	17923	20666	4060394	4057606	0	1218	14851	M
NorthernBobwhite_ScaffoldedDeNovo_contig_44791	gi|224381666|ref|NC_011462.1| TGU1	72.8	489	102	10	1569	2036	4071008	4071486	7e-68	266	14838	M
NorthernBobwhite_ScaffoldedDeNovo_contig_189474	gi|224381666|ref|NC_011462.1| TGU1	85	40	5	1	187	225	4073280	4073319	0.062	42	1	S
NorthernBobwhite_ScaffoldedDeNovo_contig_102600	gi|224381666|ref|NC_011462.1| TGU1	73.03	89	13	4	395	480	4079579	4079659	0.021	44	3	M
NorthernBobwhite_ScaffoldedDeNovo_contig_142690	gi|224381666|ref|NC_011462.1| TGU1	86.36	44	6	0	327	370	4079584	4079627	3e-05	53	4	M
NorthernBobwhite_ScaffoldedDeNovo_contig_175543	gi|224381666|ref|NC_011462.1| TGU1	72.73	99	19	3	1	95	4079600	4079694	0.0001	51	2	M
NorthernBobwhite_ScaffoldedDeNovo_contig_94450	gi|224381666|ref|NC_011462.1| TGU1	83.33	72	10	1	795	864	4079755	4079684	1e-10	73	11	M
NorthernBobwhite_ScaffoldedDeNovo_contig_137334	gi|224381666|ref|NC_011462.1| TGU1	80.33	61	11	1	261	321	4079774	4079715	3e-05	53	12	M
NorthernBobwhite_ScaffoldedDeNovo_contig_85706	gi|224381666|ref|NC_011462.1| TGU1	78.69	61	5	1	566	626	4079909	4079857	2e-05	55	4	M
NorthernBobwhite_ScaffoldedDeNovo_contig_154763	gi|224381666|ref|NC_011462.1| TGU1	72.84	81	21	1	196	276	4094546	4094467	0.021	44	2	M
NorthernBobwhite_ScaffoldedDeNovo_contig_64652	gi|224381666|ref|NC_011462.1| TGU1	74.07	81	21	0	173	253	4094547	4094467	0.0001	51	2	S
NorthernBobwhite_ScaffoldedDeNovo_contig_191589	gi|224381666|ref|NC_011462.1| TGU1	85.33	75	10	1	259	333	4096003	4095930	6e-14	82	1654	M
NorthernBobwhite_ScaffoldedDeNovo_contig_99576	gi|224381666|ref|NC_011462.1| TGU1	83.33	78	12	1	259	336	4096003	4095927	7e-13	78	740	M
NorthernBobwhite_ScaffoldedDeNovo_contig_101805	gi|224381666|ref|NC_011462.1| TGU1	77.78	54	9	1	321	374	4102140	4102190	0.061	42	2	S
NorthernBobwhite_ScaffoldedDeNovo_contig_112167	gi|224381666|ref|NC_011462.1| TGU1	78.57	56	9	1	333	388	4102140	4102192	0.005	46	2	M
NorthernBobwhite_ScaffoldedDeNovo_contig_134338	gi|224381666|ref|NC_011462.1| TGU1	88.24	34	3	1	124	157	4102258	4102290	0.35	41	18	M
NorthernBobwhite_ScaffoldedDeNovo_contig_196816	gi|224381666|ref|NC_011462.1| TGU1	69.49	177	39	7	1	172	4102468	4102634	9e-07	59	2	M
NorthernBobwhite_ScaffoldedDeNovo_contig_211969	gi|224381666|ref|NC_011462.1| TGU1	75.35	142	25	6	330	466	4102588	4102452	4e-13	80	22	M
NorthernBobwhite_ScaffoldedDeNovo_contig_18305	gi|224381666|ref|NC_011462.1| TGU1	69.13	716	141	22	23	703	4123349	4124019	2e-69	268	11	M
NorthernBobwhite_ScaffoldedDeNovo_contig_48189	gi|224381666|ref|NC_011462.1| TGU1	78.76	226	46	2	368	591	4124537	4124312	1e-44	185	14809	M
NorthernBobwhite_ScaffoldedDeNovo_contig_195566	gi|224381666|ref|NC_011462.1| TGU1	89.06	64	7	0	522	585	4125851	4125788	4e-14	84	3297	M
NorthernBobwhite_ScaffoldedDeNovo_contig_51362	gi|224381666|ref|NC_011462.1| TGU1	73.26	2827	549	53	2503	5225	4126128	4128851	0	1638	1990	M
NorthernBobwhite_ScaffoldedDeNovo_contig_212922	gi|224381666|ref|NC_011462.1| TGU1	96	25	1	0	321	345	4134637	4134613	0.21	41	64	M
NorthernBobwhite_ScaffoldedDeNovo_contig_119726	gi|224381666|ref|NC_011462.1| TGU1	70.85	446	87	12	2293	2708	4135111	4134679	4e-49	203	5	M
NorthernBobwhite_ScaffoldedDeNovo_contig_82605	gi|224381666|ref|NC_011462.1| TGU1	65.84	562	135	17	98	642	4136598	4136077	5e-26	123	4046	M
NorthernBobwhite_ScaffoldedDeNovo_contig_70322	gi|224381666|ref|NC_011462.1| TGU1	72.62	975	196	22	1671	2618	4139146	4140076	1e-144	520	1701	M
NorthernBobwhite_ScaffoldedDeNovo_contig_50288	gi|224381666|ref|NC_011462.1| TGU1	70.73	2197	423	64	8485	10603	4147873	4149927	0	973	11	M
NorthernBobwhite_ScaffoldedDeNovo_contig_16980	gi|224381666|ref|NC_011462.1| TGU1	74.83	3154	551	60	4869	7846	4168679	4165593	0	2057	836	M
NorthernBobwhite_ScaffoldedDeNovo_contig_124607	gi|224381666|ref|NC_011462.1| TGU1	81.82	77	13	1	103	179	4169686	4169761	4e-11	73	4	M
NorthernBobwhite_ScaffoldedDeNovo_contig_143674	gi|224381666|ref|NC_011462.1| TGU1	87.18	39	4	1	193	230	4186744	4186782	0.017	44	3	M
NorthernBobwhite_ScaffoldedDeNovo_contig_38339	gi|224381666|ref|NC_011462.1| TGU1	73.38	447	86	9	1952	2368	4190925	4190482	5e-66	259	8742	M
NorthernBobwhite_ScaffoldedDeNovo_contig_195838	gi|224381666|ref|NC_011462.1| TGU1	70.07	137	31	3	1	128	4196183	4196318	9e-07	59	6	M
NorthernBobwhite_ScaffoldedDeNovo_contig_167107	gi|224381666|ref|NC_011462.1| TGU1	87.3	126	16	0	45	170	4199099	4198974	5e-36	156	6	M
NorthernBobwhite_ScaffoldedDeNovo_contig_205251	gi|224381666|ref|NC_011462.1| TGU1	67.58	293	73	9	71	359	4199197	4199471	2e-13	80	4	M
NorthernBobwhite_ScaffoldedDeNovo_contig_55986	gi|224381666|ref|NC_011462.1| TGU1	79.01	624	113	7	4825	5444	4203476	4202867	1e-144	520	9	M
NorthernBobwhite_ScaffoldedDeNovo_contig_55985	gi|224381666|ref|NC_011462.1| TGU1	74.23	842	175	13	38	851	4203984	4204811	1e-144	520	4	S
NorthernBobwhite_ScaffoldedDeNovo_contig_118715	gi|224381666|ref|NC_011462.1| TGU1	87.4	127	16	0	274	400	4208075	4208201	1e-36	158	4	M
NorthernBobwhite_ScaffoldedDeNovo_contig_57866	gi|224381666|ref|NC_011462.1| TGU1	72.96	233	48	7	559	778	4208472	4208702	2e-24	118	2541	M
NorthernBobwhite_ScaffoldedDeNovo_contig_127222	gi|224381666|ref|NC_011462.1| TGU1	67.92	159	22	5	192	333	4208474	4208620	2e-07	60	54	M
NorthernBobwhite_ScaffoldedDeNovo_contig_148336	gi|224381666|ref|NC_011462.1| TGU1	77.14	105	23	1	547	650	4208475	4208579	1e-12	78	1002	M
NorthernBobwhite_ScaffoldedDeNovo_contig_35201	gi|224381666|ref|NC_011462.1| TGU1	76.65	257	51	7	252	500	4208475	4208730	7e-40	170	4350	M
NorthernBobwhite_ScaffoldedDeNovo_contig_156771	gi|224381666|ref|NC_011462.1| TGU1	77.37	137	22	4	179	306	4208476	4208612	8e-19	98	611	M
NorthernBobwhite_ScaffoldedDeNovo_contig_135872	gi|224381666|ref|NC_011462.1| TGU1	70.83	144	31	3	24	156	4208484	4208627	1e-09	68	15	M
NorthernBobwhite_ScaffoldedDeNovo_contig_161895	gi|224381666|ref|NC_011462.1| TGU1	70.83	144	31	3	25	157	4208484	4208627	1e-09	68	22	M
NorthernBobwhite_ScaffoldedDeNovo_contig_83487	gi|224381666|ref|NC_011462.1| TGU1	78.17	142	27	4	200	337	4208487	4208628	7e-20	102	958	M
NorthernBobwhite_ScaffoldedDeNovo_contig_46757	gi|224381666|ref|NC_011462.1| TGU1	73.46	211	45	6	4	205	4208524	4208732	3e-22	111	548	M
NorthernBobwhite_ScaffoldedDeNovo_contig_159416	gi|224381666|ref|NC_011462.1| TGU1	75.79	95	21	2	67	159	4208528	4208622	4e-09	66	144	M
NorthernBobwhite_ScaffoldedDeNovo_contig_159417	gi|224381666|ref|NC_011462.1| TGU1	79.35	92	17	2	166	255	4208619	4208528	3e-11	73	354	M
NorthernBobwhite_ScaffoldedDeNovo_contig_28018	gi|224381666|ref|NC_011462.1| TGU1	70.67	208	44	6	6	196	4208682	4208475	5e-16	89	1170	M
NorthernBobwhite_ScaffoldedDeNovo_contig_47837	gi|224381666|ref|NC_011462.1| TGU1	74.76	206	44	7	179	377	4208724	4208520	4e-23	113	980	M
NorthernBobwhite_ScaffoldedDeNovo_contig_110591	gi|224381666|ref|NC_011462.1| TGU1	71.38	311	82	4	14	317	4209588	4209278	4e-34	149	3	M
NorthernBobwhite_ScaffoldedDeNovo_contig_93781	gi|224381666|ref|NC_011462.1| TGU1	74.23	291	74	1	1	290	4210939	4211229	2e-44	183	4	M
NorthernBobwhite_ScaffoldedDeNovo_contig_205362	gi|224381666|ref|NC_011462.1| TGU1	86.98	192	23	2	330	519	4212290	4212099	3e-57	226	5	M
NorthernBobwhite_ScaffoldedDeNovo_contig_24489	gi|224381666|ref|NC_011462.1| TGU1	72.32	112	13	5	52	148	4215302	4215410	4e-06	57	5	M
NorthernBobwhite_ScaffoldedDeNovo_contig_71319	gi|224381666|ref|NC_011462.1| TGU1	82.24	152	19	5	281	428	4217739	4217886	1e-29	138	6	M
NorthernBobwhite_ScaffoldedDeNovo_contig_61707	gi|224381666|ref|NC_011462.1| TGU1	93.2	103	7	0	81	183	4221290	4221392	1e-35	154	1	S
NorthernBobwhite_ScaffoldedDeNovo_contig_95293	gi|224381666|ref|NC_011462.1| TGU1	93.1	29	2	0	114	142	4222113	4222085	0.028	44	2	M
NorthernBobwhite_ScaffoldedDeNovo_contig_194444	gi|224381666|ref|NC_011462.1| TGU1	86.67	45	3	2	301	345	4233063	4233104	0.001	48	93	M
NorthernBobwhite_ScaffoldedDeNovo_contig_205732	gi|224381666|ref|NC_011462.1| TGU1	93.33	30	2	0	139	168	4233097	4233068	0.008	46	5	M
NorthernBobwhite_ScaffoldedDeNovo_contig_7674	gi|224381666|ref|NC_011462.1| TGU1	71.32	1283	285	30	15759	17014	4238277	4239503	4e-166	594	17540	M
NorthernBobwhite_ScaffoldedDeNovo_contig_66016	gi|224381666|ref|NC_011462.1| TGU1	88.51	87	9	1	308	393	4257655	4257741	8e-22	109	18327	M
NorthernBobwhite_ScaffoldedDeNovo_contig_120009	gi|224381666|ref|NC_011462.1| TGU1	88.51	87	9	1	231	316	4257741	4257655	8e-22	109	17831	M
NorthernBobwhite_ScaffoldedDeNovo_contig_41201	gi|224381666|ref|NC_011462.1| TGU1	76.92	104	22	1	1552	1653	4257750	4257647	2e-11	77	2499	M
NorthernBobwhite_ScaffoldedDeNovo_contig_33839	gi|224381666|ref|NC_011462.1| TGU1	93.06	389	23	2	703	1090	4266928	4266543	2e-160	574	3934	M
NorthernBobwhite_ScaffoldedDeNovo_contig_43520	gi|224381666|ref|NC_011462.1| TGU1	82.21	208	28	3	111	317	4268955	4269154	6e-50	203	3	M
NorthernBobwhite_ScaffoldedDeNovo_contig_175774	gi|224381666|ref|NC_011462.1| TGU1	92.37	131	10	0	190	320	4270900	4270770	8e-47	192	4	M
NorthernBobwhite_ScaffoldedDeNovo_contig_206127	gi|224381666|ref|NC_011462.1| TGU1	68.25	274	57	13	1	265	4271096	4271348	1e-10	71	6	M
NorthernBobwhite_ScaffoldedDeNovo_contig_208724	gi|224381666|ref|NC_011462.1| TGU1	67.03	276	59	11	1	267	4271096	4271348	1e-09	68	4	M
NorthernBobwhite_ScaffoldedDeNovo_contig_79073	gi|224381666|ref|NC_011462.1| TGU1	72.03	2531	483	66	13	2480	4273823	4271455	0	1278	1	S
NorthernBobwhite_ScaffoldedDeNovo_contig_31961	gi|224381666|ref|NC_011462.1| TGU1	79.81	2794	347	57	2106	4798	4276508	4273831	0	2435	14	M
NorthernBobwhite_ScaffoldedDeNovo_contig_195753	gi|224381666|ref|NC_011462.1| TGU1	72.22	144	29	5	309	449	4279559	4279424	3e-09	68	2	M
NorthernBobwhite_ScaffoldedDeNovo_contig_111884	gi|224381666|ref|NC_011462.1| TGU1	83.87	62	10	0	71	132	4299089	4299028	2e-09	68	4	M
NorthernBobwhite_ScaffoldedDeNovo_contig_156390	gi|224381666|ref|NC_011462.1| TGU1	70.29	138	37	2	111	245	4299499	4299363	7e-07	59	7	M
NorthernBobwhite_ScaffoldedDeNovo_contig_129074	gi|224381666|ref|NC_011462.1| TGU1	81.01	316	54	4	298	610	4346117	4346429	2e-75	288	3	M
NorthernBobwhite_ScaffoldedDeNovo_contig_73274	gi|224381666|ref|NC_011462.1| TGU1	79.4	432	88	1	5190	5621	4346666	4347096	1e-100	374	2578	M
NorthernBobwhite_ScaffoldedDeNovo_contig_99090	gi|224381666|ref|NC_011462.1| TGU1	80.56	252	42	6	1	245	4347793	4347542	2e-53	214	2	S
NorthernBobwhite_ScaffoldedDeNovo_contig_98620	gi|224381666|ref|NC_011462.1| TGU1	71.2	184	35	6	33	214	4348184	4348017	5e-13	82	1	S
NorthernBobwhite_ScaffoldedDeNovo_contig_174948	gi|224381666|ref|NC_011462.1| TGU1	70.62	160	36	4	67	226	4348393	4348541	4e-10	69	1	S
NorthernBobwhite_ScaffoldedDeNovo_contig_177772	gi|224381666|ref|NC_011462.1| TGU1	69.89	176	44	2	162	329	4349211	4349385	7e-13	78	1	S
NorthernBobwhite_ScaffoldedDeNovo_contig_132794	gi|224381666|ref|NC_011462.1| TGU1	96.15	26	0	1	213	238	4349218	4349242	0.66	39.2	12	M
NorthernBobwhite_ScaffoldedDeNovo_contig_99089	gi|224381666|ref|NC_011462.1| TGU1	74.49	243	61	1	841	1082	4352202	4352444	1e-35	156	4	S
NorthernBobwhite_ScaffoldedDeNovo_contig_106545	gi|224381666|ref|NC_011462.1| TGU1	64.93	345	88	8	19	358	4359026	4358710	1e-10	71	2	M
NorthernBobwhite_ScaffoldedDeNovo_contig_148028	gi|224381666|ref|NC_011462.1| TGU1	88.89	36	4	0	415	450	4362851	4362886	0.002	48	7	M
NorthernBobwhite_ScaffoldedDeNovo_contig_206394	gi|224381666|ref|NC_011462.1| TGU1	74.16	89	23	0	15	103	4364372	4364284	3e-06	57	1	S
NorthernBobwhite_ScaffoldedDeNovo_contig_78091	gi|224381666|ref|NC_011462.1| TGU1	91.3	92	6	2	45	135	4365204	4365294	6e-26	123	8	M
NorthernBobwhite_ScaffoldedDeNovo_contig_39927	gi|224381666|ref|NC_011462.1| TGU1	74.97	887	179	16	10859	11711	4370743	4369866	8e-158	565	10279	M
NorthernBobwhite_ScaffoldedDeNovo_contig_178355	gi|224381666|ref|NC_011462.1| TGU1	90	30	3	0	291	320	4385362	4385391	0.23	41	61	M
NorthernBobwhite_ScaffoldedDeNovo_contig_106837	gi|224381666|ref|NC_011462.1| TGU1	73.07	661	133	23	325	974	4386494	4387120	3e-87	327	7824	M
NorthernBobwhite_ScaffoldedDeNovo_contig_213424	gi|224381666|ref|NC_011462.1| TGU1	82.61	46	8	0	34	79	4398313	4398268	0.001	48	1	S
NorthernBobwhite_ScaffoldedDeNovo_contig_3409	gi|224381666|ref|NC_011462.1| TGU1	76.49	319	58	8	314	625	4399338	4399030	4e-54	217	394	M
NorthernBobwhite_ScaffoldedDeNovo_contig_165366	gi|224381666|ref|NC_011462.1| TGU1	96.88	32	1	0	427	458	4403791	4403822	4e-05	53	2531	M
NorthernBobwhite_ScaffoldedDeNovo_contig_150594	gi|224381666|ref|NC_011462.1| TGU1	86.67	60	8	0	258	317	4444232	4444291	4e-11	73	1025	M
NorthernBobwhite_ScaffoldedDeNovo_contig_71963	gi|224381666|ref|NC_011462.1| TGU1	87.5	32	4	0	118	149	4452100	4452131	0.34	41	12	M
NorthernBobwhite_ScaffoldedDeNovo_contig_211999	gi|224381666|ref|NC_011462.1| TGU1	72.29	397	69	12	1	376	4456482	4456858	3e-50	203	2	M
NorthernBobwhite_ScaffoldedDeNovo_contig_202095	gi|224381666|ref|NC_011462.1| TGU1	72.2	428	77	13	21	426	4456889	4456482	5e-54	215	7	M
NorthernBobwhite_ScaffoldedDeNovo_contig_108398	gi|224381666|ref|NC_011462.1| TGU1	74.8	496	106	13	117	603	4461168	4460683	7e-76	289	3109	M
NorthernBobwhite_ScaffoldedDeNovo_contig_60353	gi|224381666|ref|NC_011462.1| TGU1	85.37	41	6	0	66	106	4462228	4462268	0.002	48	5	M
NorthernBobwhite_ScaffoldedDeNovo_contig_45084	gi|224381666|ref|NC_011462.1| TGU1	73.63	1153	232	26	1469	2578	4463346	4464469	0	657	1563	M
NorthernBobwhite_ScaffoldedDeNovo_contig_47597	gi|224381666|ref|NC_011462.1| TGU1	74.58	295	64	7	1	287	4467993	4468284	5e-41	172	30	M
NorthernBobwhite_ScaffoldedDeNovo_contig_68263	gi|224381666|ref|NC_011462.1| TGU1	69.79	192	34	6	2	176	4469528	4469344	4e-13	80	2	M
NorthernBobwhite_ScaffoldedDeNovo_contig_27868	gi|224381666|ref|NC_011462.1| TGU1	82.21	371	62	3	1	370	4469968	4470335	5e-98	361	1	S
NorthernBobwhite_ScaffoldedDeNovo_contig_68262	gi|224381666|ref|NC_011462.1| TGU1	76.34	262	50	4	29	282	4471810	4472067	2e-45	187	3	M
NorthernBobwhite_ScaffoldedDeNovo_contig_180978	gi|224381666|ref|NC_011462.1| TGU1	92.34	222	12	3	256	477	4472225	4472441	8e-84	315	8	M
NorthernBobwhite_ScaffoldedDeNovo_contig_187721	gi|224381666|ref|NC_011462.1| TGU1	88.89	36	4	0	657	692	4472969	4473004	0.003	48	7	M
NorthernBobwhite_ScaffoldedDeNovo_contig_32021	gi|224381666|ref|NC_011462.1| TGU1	78.37	4937	726	82	7292	12071	4477183	4472432	0	4028	1375	M
NorthernBobwhite_ScaffoldedDeNovo_contig_32020	gi|224381666|ref|NC_011462.1| TGU1	85.28	163	24	0	252	414	4478845	4479007	3e-45	187	23	M
NorthernBobwhite_ScaffoldedDeNovo_contig_106446	gi|224381666|ref|NC_011462.1| TGU1	87.43	191	22	2	266	455	4485065	4484876	8e-58	230	315	M
NorthernBobwhite_ScaffoldedDeNovo_contig_197147	gi|224381666|ref|NC_011462.1| TGU1	77.06	279	50	4	1	272	4504315	4504586	2e-52	210	28	M
NorthernBobwhite_ScaffoldedDeNovo_contig_201099	gi|224381666|ref|NC_011462.1| TGU1	80.56	108	21	0	1	108	4504340	4504233	2e-19	100	3	M
NorthernBobwhite_ScaffoldedDeNovo_contig_88123	gi|224381666|ref|NC_011462.1| TGU1	81.48	108	20	0	1	108	4504340	4504233	5e-21	105	4	M
NorthernBobwhite_ScaffoldedDeNovo_contig_37538	gi|224381666|ref|NC_011462.1| TGU1	82.98	47	8	0	949	995	4506455	4506501	0.001	50	2	S
NorthernBobwhite_ScaffoldedDeNovo_contig_102714	gi|224381666|ref|NC_011462.1| TGU1	83.33	72	12	0	346	417	4517002	4516931	3e-12	77	2789	M
NorthernBobwhite_ScaffoldedDeNovo_contig_179495	gi|224381666|ref|NC_011462.1| TGU1	68.8	125	22	3	106	213	4532113	4532237	0.0001	51	1	S
NorthernBobwhite_ScaffoldedDeNovo_contig_202460	gi|224381666|ref|NC_011462.1| TGU1	85.07	67	9	1	195	260	4535524	4535590	3e-11	73	1600	M
NorthernBobwhite_ScaffoldedDeNovo_contig_112166	gi|224381666|ref|NC_011462.1| TGU1	85	80	12	0	214	293	4535528	4535607	2e-16	91	4363	M
NorthernBobwhite_ScaffoldedDeNovo_contig_61001	gi|224381666|ref|NC_011462.1| TGU1	83.13	83	14	0	27	109	4535610	4535528	1e-15	87	3764	M
NorthernBobwhite_ScaffoldedDeNovo_contig_204644	gi|224381666|ref|NC_011462.1| TGU1	90.91	33	2	1	160	192	4537110	4537079	0.045	42	1	S
NorthernBobwhite_ScaffoldedDeNovo_contig_181035	gi|224381666|ref|NC_011462.1| TGU1	77.91	163	27	3	4	166	4538102	4538255	2e-27	127	5113	M
NorthernBobwhite_ScaffoldedDeNovo_contig_38300	gi|224381666|ref|NC_011462.1| TGU1	89.47	57	6	0	1	57	4538131	4538187	1e-11	77	5006	M
NorthernBobwhite_ScaffoldedDeNovo_contig_173176	gi|224381666|ref|NC_011462.1| TGU1	80.9	89	16	1	418	505	4538144	4538232	5e-13	80	1088	M
NorthernBobwhite_ScaffoldedDeNovo_contig_63394	gi|224381666|ref|NC_011462.1| TGU1	92.86	28	2	0	260	287	4545725	4545752	0.072	42	1	S
NorthernBobwhite_ScaffoldedDeNovo_contig_5897	gi|224381666|ref|NC_011462.1| TGU1	74.84	2750	509	54	26566	29228	4551097	4548444	0	1761	25331	M
NorthernBobwhite_ScaffoldedDeNovo_contig_130986	gi|224381666|ref|NC_011462.1| TGU1	77.86	271	50	5	46	311	4580594	4580859	9e-51	205	7	M
NorthernBobwhite_ScaffoldedDeNovo_contig_201195	gi|224381666|ref|NC_011462.1| TGU1	77.78	270	50	5	44	308	4580595	4580859	2e-50	203	12	M
NorthernBobwhite_ScaffoldedDeNovo_contig_178271	gi|224381666|ref|NC_011462.1| TGU1	71.13	388	87	5	11	380	4580939	4581319	4e-48	196	2	M
NorthernBobwhite_ScaffoldedDeNovo_contig_182302	gi|224381666|ref|NC_011462.1| TGU1	71.65	388	85	5	2	371	4581319	4580939	8e-51	205	2	M
NorthernBobwhite_ScaffoldedDeNovo_contig_16506	gi|224381666|ref|NC_011462.1| TGU1	66.96	3462	823	92	8341	11696	4599323	4596077	0	960	5882	M
NorthernBobwhite_ScaffoldedDeNovo_contig_94639	gi|224381666|ref|NC_011462.1| TGU1	68.38	680	137	19	41	708	4608799	4609412	7e-62	242	3	M
NorthernBobwhite_ScaffoldedDeNovo_contig_48926	gi|224381666|ref|NC_011462.1| TGU1	76.86	121	20	2	242	362	4626297	4626409	1e-16	91	2	M
NorthernBobwhite_ScaffoldedDeNovo_contig_134199	gi|224381666|ref|NC_011462.1| TGU1	72.41	569	94	14	533	1049	4627371	4626814	7e-83	313	5	M
NorthernBobwhite_ScaffoldedDeNovo_contig_8666	gi|224381666|ref|NC_011462.1| TGU1	66.65	2564	583	75	16077	18460	4636669	4639140	0	677	57496	M
NorthernBobwhite_ScaffoldedDeNovo_contig_65706	gi|224381666|ref|NC_011462.1| TGU1	67.88	330	82	9	5	326	4647545	4647858	1e-18	98	4	M
NorthernBobwhite_ScaffoldedDeNovo_contig_33717	gi|224381666|ref|NC_011462.1| TGU1	75.25	198	48	1	1	197	4650469	4650272	4e-29	132	2	M
NorthernBobwhite_ScaffoldedDeNovo_contig_37478	gi|224381666|ref|NC_011462.1| TGU1	68.25	211	46	6	22	223	4650829	4650631	9e-11	71	1	S
NorthernBobwhite_ScaffoldedDeNovo_contig_210047	gi|224381666|ref|NC_011462.1| TGU1	80.7	57	8	1	80	133	4665435	4665491	9e-05	51	17	M
NorthernBobwhite_ScaffoldedDeNovo_contig_29559	gi|224381666|ref|NC_011462.1| TGU1	68.78	1893	437	50	12751	14551	4672978	4671148	0	663	6834	M
NorthernBobwhite_ScaffoldedDeNovo_contig_145310	gi|224381666|ref|NC_011462.1| TGU1	69.02	610	119	22	347	920	4682823	4682248	1e-52	212	3	M
NorthernBobwhite_ScaffoldedDeNovo_contig_120502	gi|224381666|ref|NC_011462.1| TGU1	67.27	443	94	14	1	399	4688171	4687736	5e-28	129	2	M
NorthernBobwhite_ScaffoldedDeNovo_contig_120503	gi|224381666|ref|NC_011462.1| TGU1	67.65	442	95	10	1	400	4688171	4687736	2e-34	150	1	S
NorthernBobwhite_ScaffoldedDeNovo_contig_175045	gi|224381666|ref|NC_011462.1| TGU1	77.27	110	19	3	222	327	4688969	4689076	7e-13	78	4	M
NorthernBobwhite_ScaffoldedDeNovo_contig_186755	gi|224381666|ref|NC_011462.1| TGU1	70.32	155	30	5	93	240	4689312	4689167	2e-08	64	1	S
NorthernBobwhite_ScaffoldedDeNovo_contig_186754	gi|224381666|ref|NC_011462.1| TGU1	69.41	170	36	5	81	243	4689327	4689167	2e-08	64	1	S
NorthernBobwhite_ScaffoldedDeNovo_contig_13486	gi|224381666|ref|NC_011462.1| TGU1	74.76	2488	402	71	6099	8484	4689397	4691760	0	1539	15201	M
NorthernBobwhite_ScaffoldedDeNovo_contig_142130	gi|224381666|ref|NC_011462.1| TGU1	76.47	136	31	1	279	413	4692759	4692624	1e-18	98	511	M
NorthernBobwhite_ScaffoldedDeNovo_contig_53990	gi|224381666|ref|NC_011462.1| TGU1	75.96	104	20	2	210	313	4707859	4707957	1e-10	71	10	M
NorthernBobwhite_ScaffoldedDeNovo_contig_103027	gi|224381666|ref|NC_011462.1| TGU1	71.16	267	52	8	306	564	4716019	4715770	1e-25	122	10	M
NorthernBobwhite_ScaffoldedDeNovo_contig_163342	gi|224381666|ref|NC_011462.1| TGU1	74.19	155	38	1	184	338	4718720	4718568	3e-18	96	2	M
NorthernBobwhite_ScaffoldedDeNovo_contig_164248	gi|224381666|ref|NC_011462.1| TGU1	73.75	160	40	1	179	338	4718725	4718568	3e-18	96	1	S
NorthernBobwhite_ScaffoldedDeNovo_contig_33841	gi|224381666|ref|NC_011462.1| TGU1	73.96	914	192	10	23748	24624	4720649	4719745	1e-159	572	4985	M
NorthernBobwhite_ScaffoldedDeNovo_contig_99402	gi|224381666|ref|NC_011462.1| TGU1	75.57	569	116	11	95	645	4733089	4733652	2e-100	370	2	M
NorthernBobwhite_ScaffoldedDeNovo_contig_103608	gi|224381666|ref|NC_011462.1| TGU1	70.33	509	102	10	1	495	4738942	4738469	3e-60	237	1	S
NorthernBobwhite_ScaffoldedDeNovo_contig_67688	gi|224381666|ref|NC_011462.1| TGU1	85.71	56	8	0	280	335	4739149	4739204	5e-09	66	2	M
NorthernBobwhite_ScaffoldedDeNovo_contig_91100	gi|224381666|ref|NC_011462.1| TGU1	87.5	56	7	0	78	133	4739204	4739149	4e-10	69	1	S
NorthernBobwhite_ScaffoldedDeNovo_contig_120117	gi|224381666|ref|NC_011462.1| TGU1	91.67	36	3	0	2185	2220	4744490	4744455	0.001	51	6	M
NorthernBobwhite_ScaffoldedDeNovo_contig_142278	gi|224381666|ref|NC_011462.1| TGU1	68.05	817	197	24	234	1018	4745312	4746096	7e-63	246	2	M
NorthernBobwhite_ScaffoldedDeNovo_contig_173158	gi|224381666|ref|NC_011462.1| TGU1	67.38	420	114	7	100	506	4746167	4746576	1e-27	129	3	M
NorthernBobwhite_ScaffoldedDeNovo_contig_6383	gi|224381666|ref|NC_011462.1| TGU1	74.55	165	42	0	527	691	4750269	4750105	7e-21	109	3	S
NorthernBobwhite_ScaffoldedDeNovo_contig_164519	gi|224381666|ref|NC_011462.1| TGU1	80.95	63	11	1	109	171	4752534	4752595	3e-06	57	5	M
NorthernBobwhite_ScaffoldedDeNovo_contig_89732	gi|224381666|ref|NC_011462.1| TGU1	86.49	37	2	1	3	39	4754677	4754710	0.044	42	1	S
NorthernBobwhite_ScaffoldedDeNovo_contig_64394	gi|224381666|ref|NC_011462.1| TGU1	69.32	251	66	6	29	270	4755675	4755923	6e-16	89	1	S
NorthernBobwhite_ScaffoldedDeNovo_contig_39559	gi|224381666|ref|NC_011462.1| TGU1	68.53	591	154	10	228	799	4757182	4756605	2e-52	212	418	M
NorthernBobwhite_ScaffoldedDeNovo_contig_113353	gi|224381666|ref|NC_011462.1| TGU1	70.75	294	70	8	233	515	4758069	4757781	1e-25	122	1	S
NorthernBobwhite_ScaffoldedDeNovo_contig_68663	gi|224381666|ref|NC_011462.1| TGU1	79.07	129	21	2	176	299	4758956	4758829	4e-21	107	9	M
NorthernBobwhite_ScaffoldedDeNovo_contig_69089	gi|224381666|ref|NC_011462.1| TGU1	76.09	548	118	6	29	575	4759379	4759914	2e-103	383	859	M
NorthernBobwhite_ScaffoldedDeNovo_contig_112217	gi|224381666|ref|NC_011462.1| TGU1	70.07	725	149	15	165	825	4765541	4766261	3e-86	324	2	M
NorthernBobwhite_ScaffoldedDeNovo_contig_178312	gi|224381666|ref|NC_011462.1| TGU1	92.59	27	2	0	99	125	4771252	4771226	0.18	41	31	M
NorthernBobwhite_ScaffoldedDeNovo_contig_219109	gi|224381666|ref|NC_011462.1| TGU1	87.5	32	4	0	117	148	4776588	4776557	0.19	41	3	M
NorthernBobwhite_ScaffoldedDeNovo_contig_162923	gi|224381666|ref|NC_011462.1| TGU1	87.88	33	2	1	420	450	4780091	4780123	1.1	39.2	7	M
NorthernBobwhite_ScaffoldedDeNovo_contig_95266	gi|224381666|ref|NC_011462.1| TGU1	82.5	40	7	0	100	139	4793823	4793784	1.5	41	4	M
NorthernBobwhite_ScaffoldedDeNovo_contig_10443	gi|224381666|ref|NC_011462.1| TGU1	73.36	1922	368	46	17104	18994	4794083	4792275	0	1081	53913	M
NorthernBobwhite_ScaffoldedDeNovo_contig_104807	gi|224381666|ref|NC_011462.1| TGU1	71.34	492	100	9	14	491	4810692	4811156	2e-63	248	2	S
NorthernBobwhite_ScaffoldedDeNovo_contig_37180	gi|224381666|ref|NC_011462.1| TGU1	82.64	144	25	0	2	145	4811632	4811775	4e-33	147	1	S
NorthernBobwhite_ScaffoldedDeNovo_contig_151215	gi|224381666|ref|NC_011462.1| TGU1	90	30	3	0	325	354	4812470	4812441	0.18	41	61	M
NorthernBobwhite_ScaffoldedDeNovo_contig_194750	gi|224381666|ref|NC_011462.1| TGU1	81.36	220	36	3	1	217	4813400	4813183	4e-50	203	6	M
NorthernBobwhite_ScaffoldedDeNovo_contig_111048	gi|224381666|ref|NC_011462.1| TGU1	68.64	236	54	10	156	382	4814039	4813815	7e-09	66	3	M
NorthernBobwhite_ScaffoldedDeNovo_contig_47846	gi|224381666|ref|NC_011462.1| TGU1	74.9	251	55	3	40	290	4815846	4815604	2e-37	163	282	M
NorthernBobwhite_ScaffoldedDeNovo_contig_47845	gi|224381666|ref|NC_011462.1| TGU1	69.07	443	104	13	54	477	4817219	4817647	5e-35	152	8	M
NorthernBobwhite_ScaffoldedDeNovo_contig_97616	gi|224381666|ref|NC_011462.1| TGU1	79.65	172	31	3	10	179	4818554	4818723	5e-32	143	6	M
NorthernBobwhite_ScaffoldedDeNovo_contig_168225	gi|224381666|ref|NC_011462.1| TGU1	75	176	32	4	174	340	4820938	4821110	7e-23	113	6	M
NorthernBobwhite_ScaffoldedDeNovo_contig_160367	gi|224381666|ref|NC_011462.1| TGU1	67.52	428	84	8	408	784	4824580	4825003	6e-37	159	5	M
NorthernBobwhite_ScaffoldedDeNovo_contig_118446	gi|224381666|ref|NC_011462.1| TGU1	94.05	252	15	0	227	478	4825651	4825400	2e-105	387	4	M
NorthernBobwhite_ScaffoldedDeNovo_contig_171197	gi|224381666|ref|NC_011462.1| TGU1	81.77	192	31	2	49	239	4827937	4828125	2e-44	183	2	M
NorthernBobwhite_ScaffoldedDeNovo_contig_149308	gi|224381666|ref|NC_011462.1| TGU1	76.33	300	62	2	25	315	4829236	4828937	2e-55	221	4	M
NorthernBobwhite_ScaffoldedDeNovo_contig_57174	gi|224381666|ref|NC_011462.1| TGU1	69	542	126	13	129	664	4831333	4830828	7e-49	199	2	M
NorthernBobwhite_ScaffoldedDeNovo_contig_60954	gi|224381666|ref|NC_011462.1| TGU1	91.18	34	1	1	453	484	4832760	4832793	0.008	46	5	M
NorthernBobwhite_ScaffoldedDeNovo_contig_13515	gi|224381666|ref|NC_011462.1| TGU1	72.57	2654	448	64	3266	5759	4842465	4839932	0	1469	52	M
NorthernBobwhite_ScaffoldedDeNovo_contig_77494	gi|224381666|ref|NC_011462.1| TGU1	67.23	1312	266	48	97	1354	4849540	4848339	1e-96	360	3	S
NorthernBobwhite_ScaffoldedDeNovo_contig_57119	gi|224381666|ref|NC_011462.1| TGU1	77.53	316	60	5	147	460	4850102	4849796	3e-60	237	5	M
NorthernBobwhite_ScaffoldedDeNovo_contig_11377	gi|224381666|ref|NC_011462.1| TGU1	71.34	642	128	16	13337	13965	4855132	4854534	5e-80	307	32217	M
NorthernBobwhite_ScaffoldedDeNovo_contig_114740	gi|224381666|ref|NC_011462.1| TGU1	80.65	62	6	3	373	430	4859200	4859141	0.0006	50	2	M
NorthernBobwhite_ScaffoldedDeNovo_contig_95957	gi|224381666|ref|NC_011462.1| TGU1	85.88	170	10	3	121	288	4859425	4859582	3e-48	197	86	M
NorthernBobwhite_ScaffoldedDeNovo_contig_29274	gi|224381666|ref|NC_011462.1| TGU1	66.37	342	83	12	4	331	4860828	4860505	3e-11	73	2	M
NorthernBobwhite_ScaffoldedDeNovo_contig_40136	gi|224381666|ref|NC_011462.1| TGU1	71.84	909	168	23	1465	2342	4870127	4870978	6e-127	461	448	M
NorthernBobwhite_ScaffoldedDeNovo_contig_208893	gi|224381666|ref|NC_011462.1| TGU1	71.43	161	41	2	213	373	4872142	4872297	8e-13	78	4	M
NorthernBobwhite_ScaffoldedDeNovo_contig_171616	gi|224381666|ref|NC_011462.1| TGU1	71.43	161	41	2	3	163	4872297	4872142	8e-13	78	2	M
NorthernBobwhite_ScaffoldedDeNovo_contig_148444	gi|224381666|ref|NC_011462.1| TGU1	90.32	31	3	0	257	287	4875112	4875082	0.054	42	1	S
NorthernBobwhite_ScaffoldedDeNovo_contig_101894	gi|224381666|ref|NC_011462.1| TGU1	68.22	343	80	11	1	337	4883567	4883248	2e-20	104	8	M
NorthernBobwhite_ScaffoldedDeNovo_contig_212204	gi|224381666|ref|NC_011462.1| TGU1	68.02	344	80	10	1	338	4883567	4883248	1e-21	107	9	M
NorthernBobwhite_ScaffoldedDeNovo_contig_15833	gi|224381666|ref|NC_011462.1| TGU1	81.72	618	108	3	12660	13272	4884201	4884818	5e-167	596	5413	M
NorthernBobwhite_ScaffoldedDeNovo_contig_80687	gi|224381666|ref|NC_011462.1| TGU1	80.33	244	43	2	106	344	4888768	4888525	3e-55	219	2	M
NorthernBobwhite_ScaffoldedDeNovo_contig_123071	gi|224381666|ref|NC_011462.1| TGU1	72.97	407	96	7	12	411	4890309	4890708	4e-55	219	9	M
NorthernBobwhite_ScaffoldedDeNovo_contig_137566	gi|224381666|ref|NC_011462.1| TGU1	76.7	279	58	2	12	283	4890309	4890587	7e-52	208	4	M
NorthernBobwhite_ScaffoldedDeNovo_contig_26472	gi|224381666|ref|NC_011462.1| TGU1	73.41	1937	355	42	5756	7610	4893705	4895563	0	1126	3544	M
NorthernBobwhite_ScaffoldedDeNovo_contig_35043	gi|224381666|ref|NC_011462.1| TGU1	88.72	745	67	7	1	737	4895605	4896340	0	949	3	M
NorthernBobwhite_ScaffoldedDeNovo_contig_20354	gi|224381666|ref|NC_011462.1| TGU1	89.16	406	30	7	2838	3240	4896883	4896489	3e-143	515	8872	M
NorthernBobwhite_ScaffoldedDeNovo_contig_134809	gi|224381666|ref|NC_011462.1| TGU1	80.81	344	65	1	2224	2567	4910885	4911227	1e-84	320	10	M
NorthernBobwhite_ScaffoldedDeNovo_contig_146630	gi|224381666|ref|NC_011462.1| TGU1	81.85	259	37	4	1071	1322	4913895	4913640	1e-62	246	8	M
NorthernBobwhite_ScaffoldedDeNovo_contig_20355	gi|224381666|ref|NC_011462.1| TGU1	73.17	1107	216	30	3831	4915	4918516	4919563	2e-167	596	20	M
NorthernBobwhite_ScaffoldedDeNovo_contig_63356	gi|224381666|ref|NC_011462.1| TGU1	74.52	569	103	14	7777	8330	4924949	4924408	2e-92	347	1255	M
NorthernBobwhite_ScaffoldedDeNovo_contig_188014	gi|224381666|ref|NC_011462.1| TGU1	73.66	205	38	7	188	379	4929658	4929859	6e-22	109	1	S
NorthernBobwhite_ScaffoldedDeNovo_contig_46685	gi|224381666|ref|NC_011462.1| TGU1	74.07	216	35	9	188	389	4929658	4929866	4e-24	116	1	S
NorthernBobwhite_ScaffoldedDeNovo_contig_42509	gi|224381666|ref|NC_011462.1| TGU1	68.42	1754	365	55	2444	4109	4932748	4934400	7e-165	589	20969	M
NorthernBobwhite_ScaffoldedDeNovo_contig_28532	gi|224381666|ref|NC_011462.1| TGU1	67.89	246	68	5	150	390	4966375	4966614	2e-11	75	1	S
NorthernBobwhite_ScaffoldedDeNovo_contig_42439	gi|224381666|ref|NC_011462.1| TGU1	66.88	314	77	11	419	714	4977711	4978015	7e-11	73	3	M
NorthernBobwhite_ScaffoldedDeNovo_contig_113269	gi|224381666|ref|NC_011462.1| TGU1	100	24	0	0	103	126	5005397	5005374	0.027	44	3	M
NorthernBobwhite_ScaffoldedDeNovo_contig_209361	gi|224381666|ref|NC_011462.1| TGU1	100	22	0	0	183	204	5032406	5032385	0.18	41	41	M
NorthernBobwhite_ScaffoldedDeNovo_contig_9446	gi|224381666|ref|NC_011462.1| TGU1	76.54	1270	259	11	44308	45550	5033859	5035116	0	933	36117	M
NorthernBobwhite_ScaffoldedDeNovo_contig_194109	gi|224381666|ref|NC_011462.1| TGU1	86.11	36	5	0	167	202	5034672	5034707	0.049	42	1	S
[truncated: 218,147+ more rows]
