# Supplementary material for: A Draft De Novo Genome Assembly for the Northern Bobwhite (Colinus virginianus) Reveals Evidence for a Rapid Decline in Effective Population Size Beginning in the Late Pleistocene
Source: PLoS One. 2014 Mar 12;9(3):e90240. doi: 10.1371/journal.pone.0090240 (PMC3951200; doi:10.1371/journal.pone.0090240)
Supplement: Table S6 — Summary of Putative Nuclear Annotation Models via GlimmerHMM and Blastx with Manual Annotation of the Mitochondria and a Synopsis of MHC Annotations. (XLSX) [file pone.0090240.s006.xlsx]

## Sheet: TopE-valueFilteredORF-HITS
Table S6-A Putative Annotation Models via GlimmerHMM and Blastx
Itereration Number	Query Identity	Iteration Query Definition	IterationQuery Length	Hit Definition	Hit Accession	Hit Length	HSP Number	HSP Bit Score	HSP Score	HSP e-Value	HSP Query From	HSP Query To	HSP Hit From	HSP Hit To	HSP Query Frame	HSP Hit Frame	HSP Identity	HSP Positive	HSP Gaps	HSP Align Length	HSP Query Sequence	HSP Hit Sequence	HSP Midline
112488	Query_419	2-contig_11687_1	1827	gi|10119977|gb|AAG13011.1|AF288697_1spalt 1 [Gallus gallus]	AAG13011	1308	1	2082.37	5394	0	7	1111	52	1155	0	0	1087	1092	1	1105	FFELSDLLQHKKNCTKNQLVLIVNENPASPPEAFPPSSPSDNPDEQMNDTVNNTDQVDCSDLSEHNKLDKEESMDVEASSINNSSSSSKSVNNSITSSNSSTMGTSAVTTSLPHIGDLTTLGNFSVINSNVIIENLQSTKVAVAQFSQEARCNGASNNKLAVPALMEQLLALQQQQIHQLQLIEQIRHQILLLASQNADMPTSSSPSQGTLRTSANPLSTLSSHLSQQLAAAAGLAQSLASQSASISGVKQLPPI	FFELSDLLQHKKNCTKNQLVLIVNENPASPPETFPPRSPSDNPDEQMNDTVNNTDQVDCSDLSERNKLDKEESMDVEASSINNSSSSSKSVNNSITSSNSSTMGTSAVTTSLPHIGDLTTLGNFSVINSNVIIENLQSTKVAVAQFSQEARCNGASNNKLAVPALMEQLLALQQQQIHQLQLIEQIRHQILLLASQNTDMPTSSSPSQGTLRASANPLSTLSSHLSQQLAAAAGLAQSLASQSASISGVKQLPPI	FFELSDLLQHKKNCTKNQLVLIVNENPASPPE FPP SPSDNPDEQMNDTVNNTDQVDCSDLSE NKLDKEESMDVEASSINNSSSSSKSVNNSITSSNSSTMGTSAVTTSLPHIGDLTTLGNFSVINSNVIIENLQSTKVAVAQFSQEARCNGASNNKLAVPALMEQLLALQQQQIHQLQLIEQIRHQILLLASQN DMPTSSSPSQGTLR SANPLSTLSSHLSQQLAAAAGLAQSLASQSASISGVKQLPPI
300292	Query_474	1-contig_3263_1	385	gi|10801166|gb|AAG23410.1|AF208398_1POP1A protein [Gallus gallus]	AAG23410	357	1	645.195	1663	0	1	340	1	322	0	0	312	317	18	340	MDTAAVSPLTVTPLGIIPDFKNATSVPFNETACENWKEIHHLVFHVANICFAAGLIIPTTLNLHMIFLRGLLTIGCALFIIWATLYRCALDIMIWNSVFLVVNLLHFIYLVYKRRPRQHYRRRVSMEQNTDKIKIEKELSSLYKRMFEPLHVPPELFQRLTGQFCNIQTLKTGQAYAAEDKTSVDDRLSILLKGKMKVSYRGHFLHNIYPCAFIDSPEFRSTQMNRGEKFQVTIIADDNCKFLCWSRERLTYFLE	MDTTAISPLT--PLGVIPDLKNATSVPFNETACENWKEIHHLVFHVANICFAAGLVIPTTLNLHMIFLRGLLTVGCALFIIWATLYRCALDIMIWNSVFLVVNLLHFIYLVYKRRP----------------IKIEKELSSLYKRMFEPLHVPPELFQRLTGQFCNIQTLKTGQAYAAEDKTSVDDRLSILLKGKMKVSYRGHFLHNIYPCAFIDSPEFRSTQMNRGEKFQVTIIADDNCKFLCWSRERLTYFLE	MDT A+SPLT PLG+IPD KNATSVPFNETACENWKEIHHLVFHVANICFAAGL+IPTTLNLHMIFLRGLLT+GCALFIIWATLYRCALDIMIWNSVFLVVNLLHFIYLVYKRRP IKIEKELSSLYKRMFEPLHVPPELFQRLTGQFCNIQTLKTGQAYAAEDKTSVDDRLSILLKGKMKVSYRGHFLHNIYPCAFIDSPEFRSTQMNRGEKFQVTIIADDNCKFLCWSRERLTYFLE
78875	Query_670	6-contig_3412_1	514	gi|11135387|sp|Q9W757.2|SOX10_CHICKRecName: Full=Transcription factor SOX-10; Short=cSOX10	Q9W757	461	1	838.18	2164	0	1	513	1	461	0	0	457	459	52	513	MADDQDLSEVEMSPVGSEDHHCLSPGPSMASDNSPHLAGSGNGEMGKVKKEQQDSEADDDKFPVCIREAVSQVLSGYDWTLVPMPVRVNGSNKSKPHVKRPMNAFMVWAQAARRKLADQYPHLHNAELSKTLGKLWRLLARREEVRGPGSNRGQGAGSNADSSDFVSRRQIWKDELASCVQHSASSSKGLLNESDKRPFIEEAERLRMQHKKDHPDYKYQPRRRKNGKATQGEGEGQVEGEAGGAAAIQAHYKNA	MADDQDLSEVEMSPVGSEDHHCLSPGPSMASDNSSHLASSGNGEMGKVKKEQQDSEADDDKFPVCIREAVSQVLSGYDWTLVPMPVRVNGSNKSKPHVKRPMNAFMVWAQAARRKLADQYPHLHNAELSKTLGKLWR----------------------------------------------------LLNESDKRPFIEEAERLRMQHKKDHPDYKYQPRRRKNGKATQGEGEGQVEGEAGGAASIQAHYKNA	MADDQDLSEVEMSPVGSEDHHCLSPGPSMASDNS HLA SGNGEMGKVKKEQQDSEADDDKFPVCIREAVSQVLSGYDWTLVPMPVRVNGSNKSKPHVKRPMNAFMVWAQAARRKLADQYPHLHNAELSKTLGKLWR LLNESDKRPFIEEAERLRMQHKKDHPDYKYQPRRRKNGKATQGEGEGQVEGEAGGAA+IQAHYKNA
129045	Query_997	17-contig_8907_1	511	gi|114735|sp|P28685.1|CNTN2_CHICKRecName: Full=Contactin-2; AltName: Full=Axonin-1; Flags: Precursor	P28685	1036	1	743.806	1919	0	30	507	473	905	0	0	402	412	57	484	LEKDDDGLGSVTSFCFAPRSPPSSSST------DATKITLAPSSADINVGENLTLQCHASHDPTMDLTFTWSLDDFPIDLDNSEGHYRRASVKETIGDLAILNAQLKHSGQYTCTAQTVVDSASESATLTVRGPPGPPGGVVVRDIGDTTVQLSWSRGFDNHSPIARYSIEARTLLSNKWKQMRTSKCPRGCGVVPEVPVWGHQLPAELSLCARTLAATCSICSPLVLLDYIDPVNIEGNAETAQVVNLIPWMDY	ISKSDEGKYT----CFAENFMGKANSTGILSVRDATKITLAPSSADINVGENLTLQCHASHDPTMDLTFTWSLDDFPIDLDKSEGHYRRASVKEAVGDLAIVNAQLKHSGRYTCTAQTVVDSTSESATLTVRGPPGPPGGVVVRDIGDTTVQLSWSRGFDNHSPIARYSIEARTLLSNKWKQMRT-----------------------------------------------NPVNIEGNAETAQVVNLIPWMDY	+ K D+G + CFA ++ST DATKITLAPSSADINVGENLTLQCHASHDPTMDLTFTWSLDDFPIDLD SEGHYRRASVKE +GDLAI+NAQLKHSG+YTCTAQTVVDS SESATLTVRGPPGPPGGVVVRDIGDTTVQLSWSRGFDNHSPIARYSIEARTLLSNKWKQMRT +PVNIEGNAETAQVVNLIPWMDY
130506	Query_35	16-contig_4751_1	1093	gi|116734175|gb|ABK20148.1|Toll/IL-1 recepter (TIR)-domain containing adapter inducing interferon beta [Gallus gallus]	ABK20148	735	1	768.844	1984	0	379	882	1	509	0	0	409	440	9	511	MAQGGEVQPSFEDVFNILSRVPAEKLLSLKHKLKHLLFVPSKKLLQAMVLLTLGQEADARICLNALGDNLAALYIHQTRLGTAGVQKGGENSQHPQLDAGAMALLAQIYLLLANEKLCSHEAAVKAEQAANSASRDAQGETLSSIPVGDQERCGSGVSTVDSDSEFRTLRSDVSTGFFRMTNPKSMVKSSPMKIRNTSDLSGPQTLQSSGISNSFTNLLISQSPTAVFNMATPSCESGQLCEESTSDIGQPDGDR	MAQSAEVQPSFEDIFNILSQVPAEKLLSLKHKLKHLIFAPSSKLLQAMVLLTLGQEADARICLNALGDNLAALYIHQTKLGTAAVQKDGGNSQHPQLDAGAMAFLAQIYLLLANEKLCSHEAVVKAEQAANNASRDAQRDTLNSIPVGDQERYGLAISTVDSDSKFRTLRSDVSTGFLRMTSPNNTVKSSPMKIRKTSDLSGTQTLQSSGISDSFTSLLISQSPTAIFCTPTPSCQSSRLCEVSTSDAGQPDGER	MAQ EVQPSFED+FNILS+VPAEKLLSLKHKLKHL+F PS KLLQAMVLLTLGQEADARICLNALGDNLAALYIHQT+LGTA VQK G NSQHPQLDAGAMA LAQIYLLLANEKLCSHEA VKAEQAAN+ASRDAQ +TL+SIPVGDQER G +STVDSDS+FRTLRSDVSTGF RMT+P + VKSSPMKIR TSDLSG QTLQSSGIS+SFT+LLISQSPTA+F TPSC+S +LCE STSD GQPDG+R
164782	Query_167	9-contig_3030_1	706	gi|117380068|gb|ABK34433.1|cortactin-binding protein 2 [Gallus gallus]	ABK34433	1630	1	1060.06	2740	0	82	638	134	690	0	0	540	545	0	557	QLEMEKSQLQNLELEHKKLSARLEEERGKNKHIVLMLVKECKQLSGRIVEEAQKLEEVMSKFEEEKKKAGELEESLAAEKQKSTQMEAQMEKQLSEFDTEREQLRAKLHREEAHTSDLREERDKMIKMIEQLKKENESKANLSLKNKDKNKDRSFVSVSVETEEPMSRTIACQTDPVAVDSSAENTKKLPLTVSVKPSAVNPLVSGNTKTNVCANAAFVKPVIDRQSSHNELVPPTTPVLTQGPNRIEENGPSTG	KLEIEKSQLQNLELEHKKLSARLEEERGKNKHIVLMLVKECKQLSGRIVEEAQKLEEVMSKFEEEKKKASELEESLAAEKQKSTQMEAQMEKQLSEFDTEREQLRAKLHREEAHTSDLREERDKMIKMIEQLKKENESKANLSLKNKDKNKDRSFVSVSVETEEPVSRTIACQTDPVAVDSSAENTKKLPLTVSVKPSAVNPLVSGNTKMNVCANAAFVKPVIDRQSSHNELVPPTTPVLTQSPNRIEENGPSTG	+LE+EKSQLQNLELEHKKLSARLEEERGKNKHIVLMLVKECKQLSGRIVEEAQKLEEVMSKFEEEKKKA ELEESLAAEKQKSTQMEAQMEKQLSEFDTEREQLRAKLHREEAHTSDLREERDKMIKMIEQLKKENESKANLSLKNKDKNKDRSFVSVSVETEEP+SRTIACQTDPVAVDSSAENTKKLPLTVSVKPSAVNPLVSGNTK NVCANAAFVKPVIDRQSSHNELVPPTTPVLTQ PNRIEENGPSTG
73499	Query_829	182-contig_1505_1	1157	gi|117956027|gb|ABK58595.1|receptor tyrosine kinase-like orphan receptor 2 [Gallus gallus]	ABK58595	934	1	808.52	2087	0	435	830	456	851	0	0	393	396	0	396	KLKEINLSTVRFMEELGEERFGKVYKGHLFGTAPGEQTQAVAIKTLKDKAELSLREEFKHEAMMRSRLQHPNIVCLLGIVTKEQPISMIFSYCSHSDLHEFLVMRSPHSDVGSTDDDKTVKSTLEPADFFHIVTQIAAGMEYLSSHHVVHKDLATRNILVFDKLNVKISDLGLFREVYAADYYKLMGSSLLPIRWMSPEAIMYGKFSIDSDIWSYGVVLWEVFSYGLQPYCGYSNQDVIEMIRNRQVLPCPDDCP	KLKEINLSTVRFMEELGEERFGKVYKGHLFGTAPGEQTQAVAIKTLKDKAELSLREEFKHEAMMRSRLQHPNIVCLLGIVTKEQPISMIFSYCSHSDLHEFLVMRSPHSDVGSTDDDKTVKSTLEPADFFHIVTQIAAGMEYLSSHHVVHKDLATRNILVFDKLNVKISDLGLFREVYAADYYKLMGNSLLPIRWMSPEAIMFGKFSIDSDIWSYGVVLWEVFSYGLQPYCGYSNQDVIEMIRNRQVLPCPDDCP	KLKEINLSTVRFMEELGEERFGKVYKGHLFGTAPGEQTQAVAIKTLKDKAELSLREEFKHEAMMRSRLQHPNIVCLLGIVTKEQPISMIFSYCSHSDLHEFLVMRSPHSDVGSTDDDKTVKSTLEPADFFHIVTQIAAGMEYLSSHHVVHKDLATRNILVFDKLNVKISDLGLFREVYAADYYKLMG+SLLPIRWMSPEAIM+GKFSIDSDIWSYGVVLWEVFSYGLQPYCGYSNQDVIEMIRNRQVLPCPDDCP
301034	Query_645	7-contig_9422_1	475	gi|118082056|ref|XP_415968.2|PREDICTED: coiled-coil domain-containing protein 146-like [Gallus gallus]	XP_415968	920	1	780.4	2014	0	1	474	390	920	0	0	413	443	57	531	MASDMDAHTLEEFIAEEGRLFKEQEKCRKEISRLAHLTRLK-------------------------------IEEKEQKSREVQKV--------------------------QKTTEIKERIKVKASERETLKNTLTTQERELQKQHMKNKNNRAIKESLKNDCSKVVQVMHEMNEKKKQQVLDLDRLTSTVTCIEEEIAQLHEKYKRAMEERNESGLLLRSREEEICILYEKINAQEFLCRKGDIEMQAVDEKI	MVSDTDARRLEECIAEEGRLFKEQEKCRSELSRLAHLTWLKVEEKEQKSREVQKVQIQLQNIIKEIKRKDLEIEEYKKRKRRVHKQLQGVANMCDVIKNERNKCMHLVNVAQQKTAEIEDRIKVKASEIETLRNTLITQERELQKQHMKNKNNAAIKESLKNDCSKVAQVMYEMNEKKKQQVLDLDGLTNAVTRIEEEIAQLHKKYKRATEEQTESGLLLRSREEEICILYEKINAQEFLCRKGDIEMQATDEKI	M SD DA LEE IAEEGRLFKEQEKCR E+SRLAHLT LK IEE +++ R V K QKT EI++RIKVKASE ETL+NTL TQERELQKQHMKNKNN AIKESLKNDCSKV QVM+EMNEKKKQQVLDLD LT+ VT IEEEIAQLH+KYKRA EE+ ESGLLLRSREEEICILYEKINAQEFLCRKGDIEMQA DEKI
9632	Query_207	1-contig_49471_1	1246	gi|118082366|ref|XP_416130.2|PREDICTED: centrosomal protein of 290 kDa [Gallus gallus]	XP_416130	2469	1	723.776	1867	0	280	700	1104	1581	0	0	386	408	57	478	ELTKINLEAQKVEQELRDELSNSVSKAVSDADRRQIMDLEKREMELKTEVSKLRELSDIAKMQVEALEARQQCREKEVESLRMQVLDYQAQSDEKAVIAKLHQHIIALQGSESIVIGKLETLKLKLKKVEIHNLHLEQKLDEREHALYFARLEGRNRAKHLRQTVQSLRRQFSGALPLAQQEKFSRTMIQLQSDKLKILEEVQRAQQDRRNAESRAMEM---------------------EVIEWHMKMEELHLQ	ELTKINLEAQKVEQELRDELSNSVSKAVSDADRRQIMDLEKREMELKVEVSKLRELSDVAKMQVEALEARQQCREKEVESLRMQVLDCQAQSDEKAVIAKLHQHIIALQDSESIAVGKLETLKLKLKKVEIHSLHLEQKLDDREHALYFARLEGRNRAKHLRQTIQSLRRQFSGALPLAQQEKFSRTMIQLQNDKLKILEEVQRAQQDRQNAESRALEVELKLKSLEELLTALKDTRGAQKVIEWHMKMEELHLQ	ELTKINLEAQKVEQELRDELSNSVSKAVSDADRRQIMDLEKREMELK EVSKLRELSD+AKMQVEALEARQQCREKEVESLRMQVLD QAQSDEKAVIAKLHQHIIALQ SESI +GKLETLKLKLKKVEIH+LHLEQKLD+REHALYFARLEGRNRAKHLRQT+QSLRRQFSGALPLAQQEKFSRTMIQLQ+DKLKILEEVQRAQQDR+NAESRA+E+ +VIEWHMKMEELHLQ
151063	Query_692	2-contig_42067_1	779	gi|118082562|ref|XP_416174.2|PREDICTED: small subunit processome component 20 homolog [Gallus gallus]	XP_416174	2797	1	839.336	2167	0	272	779	590	1191	0	0	445	464	132	621	ISTFPSDPSVLLLADLYYTRLALCGCQEPLSQGNLMDLFEKLQPNISTGISK---------------------GDGTGELQSVFAILLQAELVPATVNDYREKLLHLRKLRCDVVLSTIPSGSLQEM----LKKQKVPSISP--SPDFSVLTKKPLNSTEEQESLTIVSAELNTEEMENKQFWKVFYEHLEKAAAYAEMELQNELDEQEESIDETESEKIPDGGEGTLFLEQLGTRTDCSERLDHTNFRFLLWKA	VTTFPSDPSALLLADLYYTRLALCGCQEPLSQGNLMELFEKLQPNISTGISKVRLLTVRILNHFETPPSTVIEGDGTGELQSVFATLLQAELVPATVNDYREKLLHLRKLRCDIALSAVPSGSLQEVPLRYLLGMLYINFSPLWDPVIELITS-------------------HAKEMENKQFWKVFYEHLERAAAYAEMELQNELDEQEESTDENESQKIPEGGVGTVFLEQLGTRTDCSERLDHTNFRFLLWKA	++TFPSDPS LLLADLYYTRLALCGCQEPLSQGNLM+LFEKLQPNISTGISK GDGTGELQSVFA LLQAELVPATVNDYREKLLHLRKLRCD+ LS +PSGSLQE+ L + SP P ++T + +EMENKQFWKVFYEHLE+AAAYAEMELQNELDEQEES DE ES+KIP+GG GT+FLEQLGTRTDCSERLDHTNFRFLLWKA
260765	Query_271	21-contig_1059_1	1159	gi|118083320|ref|XP_424000.2|PREDICTED: F-box only protein 40 [Gallus gallus]	XP_424000	747	1	1244.95	3220	0	32	663	52	682	0	0	592	607	1	632	HRTPKAPPGQHRHCEKCFSRHCRAPIETSVSCMVISCRLHCGASFHMCKQEEHQLLCPLEHVPCLNADYGCPFSMARFKLAKHLQVCPASIVCCSMEWNRWPNVDSDTTLHKNIMKESLSEECLDTALALRDQKILFKNLRVADLFPEWRKKEEVRELMEEAMGGEEGAVGGLAYGSHEGNNHLPELSQCERENLAKDKEGMDLGSYKTWENIFSKELLACQVTGSATNSGKKTEEASKQKASGPCAAISAEKTK	HRAPKAPPGQHRHCERCFSRHCRAPIEASVSCMVISCRLHCGATFHMCKQEEHQLLCPLEHVPCLNAHYGCPFSMARFKLAKHLQICPASVVCCSMEWNRWPNVDSDTTLHKNIMKENLSEECLDTALALRDQKILFRNLKVADLFPEWRKKEEVREQIE-AMDGMEGAVGGLACGSQEGNDQFPELSQCERENLAKDKEGMDLGSYKTWENIFSKELLACQVTGSATSSGKKMEEASKQKASSPCAAVSAEKAK	HR PKAPPGQHRHCE+CFSRHCRAPIE SVSCMVISCRLHCGA+FHMCKQEEHQLLCPLEHVPCLNA YGCPFSMARFKLAKHLQ+CPAS+VCCSMEWNRWPNVDSDTTLHKNIMKE+LSEECLDTALALRDQKILF+NL+VADLFPEWRKKEEVRE +E AM G EGAVGGLA GS EGN+ PELSQCERENLAKDKEGMDLGSYKTWENIFSKELLACQVTGSAT+SGKK EEASKQKAS PCAA+SAEK K
94636	Query_923	5-contig_6761_1	462	gi|118083722|ref|XP_416666.2|PREDICTED: B-cell CLL/lymphoma 9 protein [Gallus gallus]	XP_416666	1422	1	833.943	2153	0	2	461	963	1422	0	0	460	460	0	460	SGGPPPSTVSQPAPVTLPGNLPSSSPYTMPPEPTLSQNPLSIMMSRMSKFAMPSSTPLYHDAIKTVASSDDDSPPARSPNLPPMNSVPGMGINSQNPRISGPNPVGPMPTLSPMGMTQPLSHNNQMPSPNAMGPNIPPHGVPVGPGLMSHNPMMGHGSQESPMVPQGRLGFPQGFPPVQSPPQQVPFPHNGPSGGQGNFPAGMGFHGEGPLGRPTNLPQSSTDPALCKTGGPGGPDSFTVLGNNMPSVFTDPELQ	SGGPPPSTVSQPAPVTLPGNLPSSSPYTMPPEPTLSQNPLSIMMSRMSKFAMPSSTPLYHDAIKTVASSDDDSPPARSPNLPPMNSVPGMGINSQNPRISGPNPVGPMPTLSPMGMTQPLSHNNQMPSPNAMGPNIPPHGVPVGPGLMSHNPMMGHGSQESPMVPQGRLGFPQGFPPVQSPPQQVPFPHNGPSGGQGNFPAGMGFHGEGPLGRPTNLPQSSTDPALCKTGGPGGPDSFTVLGNNMPSVFTDPELQ	SGGPPPSTVSQPAPVTLPGNLPSSSPYTMPPEPTLSQNPLSIMMSRMSKFAMPSSTPLYHDAIKTVASSDDDSPPARSPNLPPMNSVPGMGINSQNPRISGPNPVGPMPTLSPMGMTQPLSHNNQMPSPNAMGPNIPPHGVPVGPGLMSHNPMMGHGSQESPMVPQGRLGFPQGFPPVQSPPQQVPFPHNGPSGGQGNFPAGMGFHGEGPLGRPTNLPQSSTDPALCKTGGPGGPDSFTVLGNNMPSVFTDPELQ
176648	Query_264	3-contig_6761_1	757	gi|118083722|ref|XP_416666.2|PREDICTED: B-cell CLL/lymphoma 9 protein [Gallus gallus]	XP_416666	1422	1	1357.04	3511	0	9	752	221	964	0	0	741	742	0	744	NPQINALRTEPKPLPQPQPPAAQDQNPPQNAKMQPTPPVSAPVSKSTGPPCPIDQDSPSVESKVMSVGSPANSTPLQTEGFGQSSTPNNRAVSPVSQGSNSSAADPKGPPQQVSGGDPSSLGENPDGLSQEQLEHRERSLQTLRDIQRMLFPDEKEFAGGQSGGPPPNSGVMDGPQKKPEGPIQAMMAQSQSLGKGSGSRTDGGAPFGPQGHRDMPFSPDEMGPPPMNSQSGPIGPDHLDHMTPEQVAWLKLQQE	NPQINALRTEPKPLPQPQPPAAQDQNPPQNAKMQPTPPVSAPVSKSTGPPCPIDQDSPSVESKVMSVGSPANSTPLQTEGFGQSSTPNNRAVSPVSQGSNSSAADPKGPPQQVSGGDPSSLGENPDGLSQEQLEHRERSLQTLRDIQRMLFPDEKEFAGGQSGGPPPNSGVMDGPQKKPEGPIQAMMAQSQSLGKGSGSRTDGGAPFGPQGHRDMPFSPDEMGPPPMNSQSGPIGPDHLDHMTPEQVAWLKLQQE	NPQINALRTEPKPLPQPQPPAAQDQNPPQNAKMQPTPPVSAPVSKSTGPPCPIDQDSPSVESKVMSVGSPANSTPLQTEGFGQSSTPNNRAVSPVSQGSNSSAADPKGPPQQVSGGDPSSLGENPDGLSQEQLEHRERSLQTLRDIQRMLFPDEKEFAGGQSGGPPPNSGVMDGPQKKPEGPIQAMMAQSQSLGKGSGSRTDGGAPFGPQGHRDMPFSPDEMGPPPMNSQSGPIGPDHLDHMTPEQVAWLKLQQE
348559	Query_275	3-contig_18800_1	623	gi|118083792|ref|XP_416693.2|PREDICTED: ubiquitin carboxyl-terminal hydrolase 16 [Gallus gallus]	XP_416693	810	1	932.169	2408	0	27	587	142	717	0	0	508	535	21	579	EKERENKDIGNQKVEKDSRNEQEKEVLLKESSHSSTNSEVTVKGLSNLGNTCFFNAVMQNLSQTPVLRELLKEAKMPDTTVKIESPELFMEPQLVKLEQPGPLTLAMHQFLTEMQETKRGVVTPKELFAQVCKKAIRFKGYQQQDSQELLRYLLDGMRAEEIQRVSVGILKALTNSDKQNEEELRKKIKEFEKKNGIKSFVDRIFGGELTSTIMCEECRT------------------QKIKNTNERNVKKNKGK	EKQQENKDVGNKKVEKDSRNEQQKEVLLKESSHSSTSSEVTVKGLSNLGNTCFFNAVMQNLSQTPVLRELLKEAKMPDTTVKIDSPELSMEPQLVKLDQPGPLTLAMHQFLTEMQETKRGVVTPKELFAQVCKKAIRFKGYQQQDSQELLRYLLDGMRAEEIQRISVGILKALTDSDKQNEEELRKKIKEYEKKKGIKSFVDRIFGGELTSTIMCEECRTVSLVHESFLDLSLPVLDDQKIKNTNERNVKKIKGR	EK++ENKD+GN+KVEKDSRNEQ+KEVLLKESSHSST+SEVTVKGLSNLGNTCFFNAVMQNLSQTPVLRELLKEAKMPDTTVKI+SPEL MEPQLVKL+QPGPLTLAMHQFLTEMQETKRGVVTPKELFAQVCKKAIRFKGYQQQDSQELLRYLLDGMRAEEIQR+SVGILKALT+SDKQNEEELRKKIKE+EKK GIKSFVDRIFGGELTSTIMCEECRT QKIKNTNERNVKK KG+
313097	Query_957	21-contig_15571_1	700	gi|118084717|ref|XP_416993.2|PREDICTED: SLIT and NTRK-like family, member 1 [Gallus gallus]	XP_416993	692	1	1061.21	2743	0	26	555	1	530	0	0	528	528	0	530	MLLWILLLETSLCFAAGNVTGDVCKEKICACNEIEGDLHVDCEKKGFTSLQHFTAPTSQFYHLFLHGNSLTRLFPNEFANFYNAVSLHMENNGLHEIVPGAFLGLQLVKRLHINNNKIKSFRKQTFLGLDDLEYLQADFNLLRDIDPGAFRDLNKLEVLILNDNLISTLPPNVFQYVPITHLDLRGNRLKTLPYEEVLEQIPGIAEILLEDNPWDCTCDLLSLKEWLENIPKNALIGRVICEAPTRLQGKDLNET	MLLWILLLETSLCFAAGNVTGDVCKEKICACNEIEGDLHVDCEKKGFTSLQHFTAPTSQFYHLFLHGNSLTRLFPNEFANFYNAVSLHMENNGLHEIVPGAFLGLQLVKRLHINNNKIKSFRKQTFLGLDDLEYLQADFNLLRDIDPGAFRDLNKLEVLILNDNLISTLPPNVFQYVPITHLDLRGNRLKTLPYEEVLEQIPGIAEILLEDNPWDCTCDLLSLKEWLENIPKNALIGRVICEAPTRLQGKDLNET	MLLWILLLETSLCFAAGNVTGDVCKEKICACNEIEGDLHVDCEKKGFTSLQHFTAPTSQFYHLFLHGNSLTRLFPNEFANFYNAVSLHMENNGLHEIVPGAFLGLQLVKRLHINNNKIKSFRKQTFLGLDDLEYLQADFNLLRDIDPGAFRDLNKLEVLILNDNLISTLPPNVFQYVPITHLDLRGNRLKTLPYEEVLEQIPGIAEILLEDNPWDCTCDLLSLKEWLENIPKNALIGRVICEAPTRLQGKDLNET
90029	Query_315	18-contig_19681_1	1885	gi|118084813|ref|XP_425621.2|PREDICTED: protocadherin-20 [Gallus gallus]	XP_425621	941	1	1634	4230	0	994	1845	1	853	0	0	814	830	1	853	MLPSQLTVSVGEVVHRGWLPPASPPSLTPPSPHTPVLFSPQHLLLFLLFVGPFNCFASYSRATELFYSLNEGLPAGVLIGSLARDLRLPTAGGQRPAAPQPPLSFTLASRGLGGQYVHLDNRSGELHTSDLEIDREALCVESGGATVPGETDTISSFSSSSPESCLLLLDVLVL-PQEYFRLVKVKIAIRDVNDNAPRFPVPHIHLSVPENAPVNTRLAIEHPALDPDVGTNGVQTYRLRDNYGVFTLDVEENES	MLHSQLAVAVGEVVGRGWLPPASPPSLTPLYPHTPVLLSPQHLLLFLLFVGPFNCFASYSRATELFYSLNEGLPAGVLIGSLARDLRLPTAGGQRPAAPQPPLSFTLASRGLGGQYVHLDNRSGELHTSALEIDREALCMESGGSTVPGEGDTVSLSSSSSSPDSCLLLLDVLVLPQEYFRLVKVKIAIRDVNDNAPRFPVPHIHLSVPENAPVNTRLAIEHPALDPDVGTNGVQTYRLRDNYGVFTLDVEENES	ML SQL V+VGEVV RGWLPPASPPSLTP PHTPVL SPQHLLLFLLFVGPFNCFASYSRATELFYSLNEGLPAGVLIGSLARDLRLPTAGGQRPAAPQPPLSFTLASRGLGGQYVHLDNRSGELHTS LEIDREALC+ESGG+TVPGE DT+S SSSS LLL +++ PQEYFRLVKVKIAIRDVNDNAPRFPVPHIHLSVPENAPVNTRLAIEHPALDPDVGTNGVQTYRLRDNYGVFTLDVEENES
114001	Query_806	4-contig_13543_1	458	gi|118084920|ref|XP_417089.2|PREDICTED: short transient receptor potential channel 4 [Gallus gallus]	XP_417089	974	1	689.108	1777	0	1	445	512	970	0	0	364	378	94	499	MLLDILKFLFIYCLVLLAFANGLNQLYFYYETQETKCKGIRCAEQNNAFS---------------------TNV----------------CFCCISCA-----------------QDHADIEWKFARTKLWMSYFEEGGTLPTPFNVIPSPKSLCFKEPFVGKKLFSFRTEFLIGVHAKNSKDLGLWESQVNFHSPAFQIALVVIALTGKAIALFLGVSELRRAADNLRRHHQYQEVMRNLVKRYVAAMIRDAKT	MLLDILKFLFIYCLVLLAFANGLNQLYFYYETQETKCKGIRCAEQNNAFSTLFETLQSLFWSIFGLINLYVTNVQPKHEFTEFVGATMFGTYNVISLVVLLNMLIAMMNNSYQLIADHADIEWKFARTKLWMSYFEEGGTLPTPFNVIPSPKSLWYLIRWLWRHLCKKKIR-------RKPESFGT-----------------------------IG----RRAADNLRRHHQYQEVMRNLVKRYVAAMIRDAKT	MLLDILKFLFIYCLVLLAFANGLNQLYFYYETQETKCKGIRCAEQNNAFS TNV + IS DHADIEWKFARTKLWMSYFEEGGTLPTPFNVIPSPKSL + ++ + L + + + G +G RRAADNLRRHHQYQEVMRNLVKRYVAAMIRDAKT
45694	Query_676	10-contig_22656_1	788	gi|118084969|ref|XP_417105.2|PREDICTED: klotho [Gallus gallus]	XP_417105	999	1	760.37	1962	0	63	448	516	901	0	0	356	373	0	386	VDTTPAQFLDSNVYVWDVHHTKKLIKVDGVFTSKRKHHCVDFAAIRLQISLLQEMHVTHFHFALKWSSVLPLGNISLINHTLVHYYQCFASELLRVNITPVVALWQPMAENQELPTYLAKYGAWENSETVQAFVEYAKFCFASLGNHVKFWITMNEPSVKNLTYTAGHNLLKAHAKAWHLYDKEFRRSQKGKISIALQADWVEPACPFSRNDQEVADRILEFDIGWLAEPIFGNGDYPHVMRSWLHQRNSIDLYN	VDTTPAQFLDPNVYVWDVHQTKKLIKVDGVFTSQRKHHCVDFAAIRLQISLLQEMHVTHFHFSLKWSSVLPLGNLSLINHTLVHYYQCFASELLRVNITPVVALWQPMAENQELPTSLAKFGAWENSETVQAFVEYAKFCFASLGDHVKFWITMNEPSVKNLTYTAGHNLLRAHAKAWHLYDKEFRRSQKGKISIALQADWVEPACPFSRNDQEVADRILEFDIGWLAEPIFGSGDYPHMMRAWLHQRNSVDLYN	VDTTPAQFLD NVYVWDVH TKKLIKVDGVFTS+RKHHCVDFAAIRLQISLLQEMHVTHFHF+LKWSSVLPLGN+SLINHTLVHYYQCFASELLRVNITPVVALWQPMAENQELPT LAK+GAWENSETVQAFVEYAKFCFASLG+HVKFWITMNEPSVKNLTYTAGHNLL+AHAKAWHLYDKEFRRSQKGKISIALQADWVEPACPFSRNDQEVADRILEFDIGWLAEPIFG+GDYPH+MR+WLHQRNS+DLYN
261459	Query_767	2-contig_1165_1	548	gi|118085033|ref|XP_417134.2|PREDICTED: spermatogenesis-associated protein 13 [Gallus gallus]	XP_417134	1271	1	1060.44	2741	0	32	547	715	1271	0	0	508	513	43	558	AAADGGTESSALVDDNGSEEDYSYEELCQATPRYLQPGGEQLAINELISDGSVVYAEALWDHVTMDDQELGFKAGDVIRVLEASNKDWWWGRNEDKEAWFPASFVRLRVNQEELPENCNSIQDEEQDADSSKHRQKIAENKDQMRTNVIQEIMNTERVYIKHLKDICEGYIRQCRKHTGMFTTAQLSTIFGNIEDIYKFQRKFLKDLEKQYNKEEPHLSEIGSCFLQHQEGFAIYSEYCNNHPSACIELSKLMKQ	AAADGGTESSALVDDNGSEEDYSYEELCQATPRYLQPGGEQLAINELISDGSIVYAEALWDHVTMDDQELGFKAGDVIRVLEASNKDWWWGRNEDKEAWFPASFVRLRVNQEELPENCNSIQDEEQDADISKHRQKIAENKDQMRTNVIQEIMNTERVYIKHLKDICEGYIRQCRKHTGMFTTAQLSTIFGNIEDIYKFQRKFLKDLEKQYNKEEPHLSEIGSCFLQHQEGFAIYSEYCNNHPSACIELSKLMKQ	AAADGGTESSALVDDNGSEEDYSYEELCQATPRYLQPGGEQLAINELISDGS+VYAEALWDHVTMDDQELGFKAGDVIRVLEASNKDWWWGRNEDKEAWFPASFVRLRVNQEELPENCNSIQDEEQDAD SKHRQKIAENKDQMRTNVIQEIMNTERVYIKHLKDICEGYIRQCRKHTGMFTTAQLSTIFGNIEDIYKFQRKFLKDLEKQYNKEEPHLSEIGSCFLQHQEGFAIYSEYCNNHPSACIELSKLMKQ
159142	Query_786	4-contig_45839_1	826	gi|118085281|ref|XP_425679.2|PREDICTED: 52 kDa repressor of the inhibitor of the protein kinase [Gallus gallus]	XP_425679	767	1	1251.11	3236	0	59	686	120	747	0	0	613	624	0	628	NEAFEREQATQELNESNAQNTVAEEGGEQQEEKSVPLTLEERENKDYLKSLFEILILMGKQNIPLDSHNVDELPEGIFTSDNFQALLEYRINAGDEVLRRRFEMTAVNLEYCSKTQQKQMLEICESCIREETLREVRDSHFFSIITDEVVDIAGEEHLPVLVRFVDDSHNLREEFVGFLPYEADPEILAVKFHTTITEKWGLNMEYCRGQAYIVSSGFASKMKVVATRLLEKYPQAVYTLCSSCALNVWLAKSVP	NEAFEREQATQELNESNAQNAVSEEGGEQQEEKSVPLTLEERENKDYLKSLFEILILMGKQNIPLDSHNADELPEGIFTSDNFQALLEYRINAGDEVLRKRFEMTAVNLEYCSKTQQKQMLEICESCIREETLREVRDSHFFSIVTDEVVDIAGEEHLPVLVRFVDDSHNLREEFIGFLPYEADPEILAVKFHTTITEKWGLNMEYCRGQAYIVSSGFASKMKVVATRLLEKYPQAVYTLCSSCALNVWLAKSVP	NEAFEREQATQELNESNAQN V+EEGGEQQEEKSVPLTLEERENKDYLKSLFEILILMGKQNIPLDSHN DELPEGIFTSDNFQALLEYRINAGDEVLR+RFEMTAVNLEYCSKTQQKQMLEICESCIREETLREVRDSHFFSI+TDEVVDIAGEEHLPVLVRFVDDSHNLREEF+GFLPYEADPEILAVKFHTTITEKWGLNMEYCRGQAYIVSSGFASKMKVVATRLLEKYPQAVYTLCSSCALNVWLAKSVP
70729	Query_688	3-contig_2347_1	399	gi|118086487|ref|XP_418986.2|PREDICTED: serpin B5 [Gallus gallus]	XP_418986	375	1	741.11	1912	0	3	368	1	366	0	0	362	363	0	366	MDALQLANTAFAVDMFKKLCEKDRTDNIVFAPLCTSTSLALAYKATKGDTADQMKKVLHLQDVKDVSFGFQTVTADVSKLTSFFALKMVKRLFVDKSLSPTTDFVNSTKRPFPSELELVEFKEKTEETRQKINKSLSELTDGKMENILNEDSVSDQTQILLVNAAYFVTNWMKKFPEAEIKECPFKVNKTETKPVQMMNLEATFCLGYVKELNVAILELPCLNKHISMLILLPKDIEDETTGLEKLEKALTPETL	MDALQLANTAFAVDMFKKLCEKDRTANIVFAPLCTSTSLALAYKATKGDTADQMKKVLHLQDVKDVSFGFQTVTADVSKLTSFFALKMVKRLFVDKSLSPTTDFVNSTKRPFPSELELVEFKEKTEETRQKINKSLSELTDGKMENILNEDSVSDQTQILLVNAAYFVTNWMKKFPEAEIKECPFKVNKTETKPVQMMNLEATFCLGYVKELNVAILELPCLNKHISMLILLPKDIEDETTGLEKLEKALTPETL	MDALQLANTAFAVDMFKKLCEKDRT NIVFAPLCTSTSLALAYKATKGDTADQMKKVLHLQDVKDVSFGFQTVTADVSKLTSFFALKMVKRLFVDKSLSPTTDFVNSTKRPFPSELELVEFKEKTEETRQKINKSLSELTDGKMENILNEDSVSDQTQILLVNAAYFVTNWMKKFPEAEIKECPFKVNKTETKPVQMMNLEATFCLGYVKELNVAILELPCLNKHISMLILLPKDIEDETTGLEKLEKALTPETL
177841	Query_680	4-contig_36201_1	758	gi|118087387|ref|XP_418429.2|PREDICTED: zinc finger protein ZFAT [Gallus gallus]	XP_418429	1259	1	1065.06	2753	0	180	735	222	765	0	0	513	526	12	556	VLLGATKIVPVEAAPQESEPTSPEAVVQDPSQRRGYQEYAIQQTPYDEIKQVILSVIVCFFLCFFRLGPTQLKIFTCEYCNKVFKFKHSLQAHLRIHTNEKPYKCSYCNYASAIKANLNVHMRKHTGEKFSCDYCTFTCLSKGHLKVHIERVHKKIKQHCRFCKKKYSDVKNLIKHIKETHDLQDKKVKDVFDELRLMTREGKRQLLYDCHICERKFKNELDRDRHMLVHGDERPFACELCGHGATKYQALELHV	AIPGATKIVPVEAAPQESEPTTPETVVQDPSQRRGYQEYAIQQTPYEQTMKS------------SRLGPTQLKIFTCEYCNKVFKFKHSLQAHLRIHTNEKPYKCSYCNYASAIKANLNVHMRKHTGEKFSCDYCTFTCLSKGHLKVHIERVHKKIKQHCRFCKKKYSDVKNLIKHIKETHDLQDKKVKDVFDELRLMTREGKRQLLYDCHICERKFKNELDRDRHMLVHGDERPFACELCGHGATKYQALELHV	+ GATKIVPVEAAPQESEPT+PE VVQDPSQRRGYQEYAIQQTPY++ + RLGPTQLKIFTCEYCNKVFKFKHSLQAHLRIHTNEKPYKCSYCNYASAIKANLNVHMRKHTGEKFSCDYCTFTCLSKGHLKVHIERVHKKIKQHCRFCKKKYSDVKNLIKHIKETHDLQDKKVKDVFDELRLMTREGKRQLLYDCHICERKFKNELDRDRHMLVHGDERPFACELCGHGATKYQALELHVR
171346	Query_885	34-contig_23707_1	687	gi|118087588|ref|XP_419330.2|PREDICTED: kinesin family member 16B [Gallus gallus]	XP_419330	1474	1	678.322	1749	0	3	429	764	1190	0	0	406	416	0	427	SCRKQIEEMEEKQRSDKAELVRMQQEVESQRKETEIVQLQIRKQEESLKRRSVHIESRLKDLLAEKEKFEEERLREQQEIELQKKKQQEEIFARVKEELQRLQELNHKEKAEKMQIFRELEKLKQEKDEQYIKLESEKKRLEEQEREQVMLVAHLEEQLREKQVMIQLLKRGDVQRVEEEKRDLEDIRESLLKVKEARSEGEENSEELEKAQHSFIEFKKKQLEQLTILEKDLVQQMNHLEKEIAHEKETLGCLK	SKRKQIEEMEEKQRSDKAELVRMQQEVESQRKETEIVQLQIRKQEESLKRRSVHIESRLKDLLAEKEKFEEERLREQQEIELQKKKQQEEIFARVKEELQRLQELNHKEKAEKMQIFRELEKLKKEKDEQYIKLESEKKRIEEQEREQVMLVAHLEEQLREKQVMIQLLKRGDVQRVEEEKRDLEDIRESLLKVKEARSEGEENCEELEKAQHSFIEFKKKQLEQLTILEKDLVQQMDHLEKDIAHEKETLEYLK	S RKQIEEMEEKQRSDKAELVRMQQEVESQRKETEIVQLQIRKQEESLKRRSVHIESRLKDLLAEKEKFEEERLREQQEIELQKKKQQEEIFARVKEELQRLQELNHKEKAEKMQIFRELEKLK+EKDEQYIKLESEKKR+EEQEREQVMLVAHLEEQLREKQVMIQLLKRGDVQRVEEEKRDLEDIRESLLKVKEARSEGEEN EELEKAQHSFIEFKKKQLEQLTILEKDLVQQM+HLEK+IAHEKETL LK
366109	Query_59	2-contig_89892_1	1153	gi|118087662|ref|XP_419346.2|PREDICTED: aftiphilin [Gallus gallus]	XP_419346	882	1	755.747	1950	0	8	429	174	595	0	0	367	389	0	422	FHILTNGFAALDPVNPQGAEDLDSISDSKGLKTVSTHGTEQSLNSIPSSGEGFADFAAFTNRKTINVEGTGPTICTVVGERDSLNIQENNRVNRVIHTEEETCIAEISCEQDSSALEVNEFTISGTFQTTGSSICTTENGESNGRRKQHGVENGKDFSQLDDFSGAEDLKVDEVESFSSDLKGENVGDSEEVKNDGSSTEVVACHDAHDDDFGDFGSVSSASSAFVNAQDSVNALALEGTSEQPAHISKPNDAFG	LEILTNGFAALDPVNPQGTEDLDTISDSKGLKTVSSHSTELSLNSIPSSGEGFADFATFSNRKTINVEGTGPTICTVLSERDSLNIQENNRINRAIHTEEETCIAEVSCEQDSSALEVNEFTFSSTFQTTGSTICTTENGENNGRRKQHDGENGKDFSQLDGFSGAEDIKIDEVESLSTHLRGENVDDSVEVKNGGSSTEVVACHVTHDDDFGDFGSVSSASSAFINAQESVNASALEGTSEQPAHVSKRNDAFG	ILTNGFAALDPVNPQG EDLD+ISDSKGLKTVS+H TE SLNSIPSSGEGFADFA F+NRKTINVEGTGPTICTV+ ERDSLNIQENNR+NR IHTEEETCIAE+SCEQDSSALEVNEFT S TFQTTGS+ICTTENGE+NGRRKQH ENGKDFSQLD FSGAED+K+DEVES S+ L+GENV DS EVKN GSSTEVVACH HDDDFGDFGSVSSASSAF+NAQ+SVNA ALEGTSEQPAH+SK NDAFGEF
54028	Query_378	32-contig_19662_1	1203	gi|118087850|ref|XP_419396.2|PREDICTED: protein dispatched homolog 1 [Gallus gallus]	XP_419396	1542	1	2353.56	6098	0	31	1167	327	1463	0	0	1122	1129	0	1137	IQIRSHSQFGDLCQRATAASCCPSWTLGNYIAILNNRSSCQKIVERDVSHTLKLLRTCAKYYYNGTLGPDCWDMNAKRKDQLKCTNVPRKCTKYNAVYQILHYLVDKDFLSPKTADYVLPALKYSMLFSPTEKGESMMSIYLDNFENWNSSDGVTTVTGIEFGIKHSLFQDYLLMDTVYPAIAIVIVLLVMCVYTKSMFITLMTMFAIISSLIVSYFLYRVVFNFEFFPFMNLTALIILVGIGADDAFVLCDVWN	LRIRSHSQFGDLCQRATAASCCPSWTLGNYIAILNNRSSCQKIVERDVSHTLKLLRTCAKYYYNGTLGPDCWDMNAKRKDQLKCTNVPRKCTKYNAVYQILHYLVDKDFLSPKTADYVLPALKYSMLFSPTEKGESMMSIYLDNFENWNSSDGVTTVTGIEFGIKHSLFQDYLLMDTVYPAIAIVIVLLVMCVYTKSMFITLMTMFAIISSLIVSYFLYRVVFNFEFFPFMNLTALIILVGIGADDAFVLCDVWN	++IRSHSQFGDLCQRATAASCCPSWTLGNYIAILNNRSSCQKIVERDVSHTLKLLRTCAKYYYNGTLGPDCWDMNAKRKDQLKCTNVPRKCTKYNAVYQILHYLVDKDFLSPKTADYVLPALKYSMLFSPTEKGESMMSIYLDNFENWNSSDGVTTVTGIEFGIKHSLFQDYLLMDTVYPAIAIVIVLLVMCVYTKSMFITLMTMFAIISSLIVSYFLYRVVFNFEFFPFMNLTALIILVGIGADDAFVLCDVWN
44843	Query_931	39-contig_5365_1	1047	gi|118087885|ref|XP_419419.2|PREDICTED: tyrosine-protein phosphatase non-receptor type 14 isoform 2 [Gallus gallus]	XP_419419	1191	1	769.229	1985	0	9	406	356	753	0	0	397	397	0	398	DSIFHGNEETFYCRSQTSLDRCPVDFSYLNGNGPNGSVCSAHSMNSLNRSQNFIQASPMSSNLSIPGSDIMRADYIPSHRHSAIIVPSYRPTPDYETVMRQMKRGVIQMDSQSQSLRNLNIGNTHAYNQPEDLVYSQPEIRERHPYTVTYGPQGGGYNKPVTPSDQMNPNNAVQNKTAASAISHTVSTPELANMQLQSSQNYNTAHMLKNYLFRPPPPYPRPRPATSTPDLASHRHKYVSGSSPDLVTRKVQLSV	DSIFHGNEETFYCRSQTSLDRCPVDFSYLNGNGPNGSVCSAHSMNSLNRSQNFIQASPMSSNLSIPGSDIMRADYIPSHRHSAIIVPSYRPTPDYETVMRQMKRGVIQMDSQSQSLRNLNIGNTHAYNQPEDLVYSQPEIRERHPYTVTYGPQGGGYNKPVTPSDQMNPNNAVQNKTAASAISHTVSTPELANMQLQSSQNYNTAHMLKNYLFRPPPPYPRPRPATSTPDLASHRHKYVSGSSPDLVTRKVQLSV	DSIFHGNEETFYCRSQTSLDRCPVDFSYLNGNGPNGSVCSAHSMNSLNRSQNFIQASPMSSNLSIPGSDIMRADYIPSHRHSAIIVPSYRPTPDYETVMRQMKRGVIQMDSQSQSLRNLNIGNTHAYNQPEDLVYSQPEIRERHPYTVTYGPQGGGYNKPVTPSDQMNPNNAVQNKTAASAISHTVSTPELANMQLQSSQNYNTAHMLKNYLFRPPPPYPRPRPATSTPDLASHRHKYVSGSSPDLVTRKVQLSV
4474	Query_905	10-contig_7400_1	424	gi|118088053|ref|XP_426130.2|PREDICTED: transmembrane protein 151B [Gallus gallus]	XP_426130	530	1	884.404	2284	0	1	423	108	530	0	0	423	423	0	423	MMYHDSPCSNGYVYIPLAFLVMLYVVYLVECWHCYTRNELQYKVDVESVHERVQRMQQATPCIWWKAISYHYVRRTRQVTRYRNGDAYTTTQVYHERVNTHVAEAEFDYSNCGVKDISKDLIDLESYPATRLRFTKCFSFANVESENSYLTQRARFFTENEGLDDYMEAREGMHLKNVDFKEYMVAFSDPDNLPWYVSHYVFWVAALLTLSWPLRVLNEYRTSYVHYHVEKLFGFDYVAVTPAEERSFCRRMPRV	MMYHDSPCSNGYVYIPLAFLVMLYVVYLVECWHCYTRNELQYKVDVESVHERVQRMQQATPCIWWKAISYHYVRRTRQVTRYRNGDAYTTTQVYHERVNTHVAEAEFDYSNCGVKDISKDLIDLESYPATRLRFTKCFSFANVESENSYLTQRARFFTENEGLDDYMEAREGMHLKNVDFKEYMVAFSDPDNLPWYVSHYVFWVAALLTLSWPLRVLNEYRTSYVHYHVEKLFGFDYVAVTPAEERSFCRRMPRV	MMYHDSPCSNGYVYIPLAFLVMLYVVYLVECWHCYTRNELQYKVDVESVHERVQRMQQATPCIWWKAISYHYVRRTRQVTRYRNGDAYTTTQVYHERVNTHVAEAEFDYSNCGVKDISKDLIDLESYPATRLRFTKCFSFANVESENSYLTQRARFFTENEGLDDYMEAREGMHLKNVDFKEYMVAFSDPDNLPWYVSHYVFWVAALLTLSWPLRVLNEYRTSYVHYHVEKLFGFDYVAVTPAEERSFCRRMPRV
276831	Query_871	30-contig_19521_1	517	gi|118088212|ref|XP_419564.2|PREDICTED: signal-induced proliferation-associated 1 like 2 [Gallus gallus]	XP_419564	1716	1	1001.12	2587	0	1	488	1	488	0	0	481	484	0	488	MSDQRSLQEDKHKLSRTSSKFRESSRSMQSDDYFARKLKALNGSMGPPVPSNASSKTESNQSNGTPAVPKMGVRARVSEWPPKKDCSKELSKAAWENRSPASYEGVGSVHPNGQNDQNEGQQEELELEFAEGKYSIGDLFVHSPQRGLHPIRQRSNSDVTISDIDAEDVLDQNAVNPNTGAALHREYGSTSSIDRQGLSGENFFAMLRGYRVENFEHKALAPFGFPEFFHCDPSVSPSLHAAAQISRGEFVRISG	MSDQRSLQEDKHKISRTSSKFRESSRSMQSDDYFARKLKALNGSMGPPVPSNASSKSESNQSNGTPAVPKMGVRARVSEWPPKKDCSKELSKAAWENRPQASYESVGSVHPNGQNDQNEGQQEELELEFAEGKYSIGDLFVHSPQRGLHPIRQRSNSDVTISDIDAEDVLDQNAVNPNTGAALHREYGSTSSIDRQGLSGENFFAMLRGYRVENFEHKTLAPFGFPEFFHCDPSVSPSLHAAAQISRGEFVRISG	MSDQRSLQEDKHK+SRTSSKFRESSRSMQSDDYFARKLKALNGSMGPPVPSNASSK+ESNQSNGTPAVPKMGVRARVSEWPPKKDCSKELSKAAWENR ASYE VGSVHPNGQNDQNEGQQEELELEFAEGKYSIGDLFVHSPQRGLHPIRQRSNSDVTISDIDAEDVLDQNAVNPNTGAALHREYGSTSSIDRQGLSGENFFAMLRGYRVENFEHK LAPFGFPEFFHCDPSVSPSLHAAAQISRGEFVRISG
362609	Query_24	61-contig_2164_1	611	gi|118088483|ref|XP_419718.2|PREDICTED: brefeldin A-inhibited guanine nucleotide-exchange protein 3 [Gallus gallus]	XP_419718	2177	1	834.328	2154	0	186	595	1706	2115	0	0	400	404	0	410	SIPFRTIVVSLLSHQVLLQNLYDILLEEFVKSPSNLEEKMTIQVPENKLAGFLRYISMQNLAVIFDLLLESYRTAREFDSRPGLKCLLKKVSGISGAANLYRQSAMSFNIYFHALICAILTNQENITAEQVKKILFEDDERSTDSSQQCSSEDEDIFEETAQVSPPRGKEKRQWRARIPSLSVQPVSNADWGWLIKRLHKLCMELCNNYIQMHLDLENNVEEPPVFKGDPFFILPSFHSETSTPSTGGQSGKDTP	SIPFRTIVVSLLSHQVLLQNLYDILLEEFIKGPSNLEEKMTIQVPENKLAGFLRYISMQNLAVIFDLLLDSYRTAREFDTRPGLKCLLKKVSGISGAANLYRQSAMSFNIYFHALICAILTNQENITAEQVKKILFEDDERSTDSSQQCSSEDEDIFEETAQVSPPRGKEKRQWRARIPSLSVQPVSNADWGWLIKRLHKLCMELCNNYIQMHLDLENNVEEPPAFKGDPFFILPSFHSETSTPSTGGQSGKDTP	SIPFRTIVVSLLSHQVLLQNLYDILLEEF+K PSNLEEKMTIQVPENKLAGFLRYISMQNLAVIFDLLL+SYRTAREFD+RPGLKCLLKKVSGISGAANLYRQSAMSFNIYFHALICAILTNQENITAEQVKKILFEDDERSTDSSQQCSSEDEDIFEETAQVSPPRGKEKRQWRARIPSLSVQPVSNADWGWLIKRLHKLCMELCNNYIQMHLDLENNVEEPP FKGDPFFILPSFHSETSTPSTGGQSGKDTP
187819	Query_934	21-contig_14515_1	685	gi|118088641|ref|XP_426177.2|PREDICTED: G-protein coupled receptor family C group 6 member A [Gallus gallus]	XP_426177	996	1	654.44	1687	0	90	437	554	901	0	0	332	339	0	348	SDMDYCYRCLNKTYWAPMNSTTCYRKTIHFLSWTDWFAVFLLLLSAFGVVLILFISAIFTKNLSTPVVKASGGLTVCYILLLSHFFIFLSTVFFIGEPTEFKCRTRQALFGISFALCISCILIKSLKILLAFSFDPKLQNFLKCAYKPITIVFICTGIQVIICTFWLIFRTPFVKQNFSIPRAIILECNEGSVVAFGIMLGYIAALAFICFICAFKGRKLPENYNEAKFITFGMLIYFIAWIVFIPVYVTTFGKY	TDMDYCYRCHNKTYWAPVNSTTCYRKTIHFLGWTDWFAIFLLLLSAFGVVLIFSISAIFTKNLSTPVVKASGGLTVCYIILLSHFFIFLSTVFFIGEPTEFKCRTRQALFGISFALCISCILIKSLKILLAFSFDPKLQNFLKCAYKPITIVFICTGIQVIICTFWLIFRTPFVKQNFSIPRAIILECNEGSVVAFGIMLGYIAALAFICFICAFKGRKLPENYNEAKFITFGMLIYFIAWIVFIPVYVTTFGKY	+DMDYCYRC NKTYWAP+NSTTCYRKTIHFL WTDWFA+FLLLLSAFGVVLI ISAIFTKNLSTPVVKASGGLTVCYI+LLSHFFIFLSTVFFIGEPTEFKCRTRQALFGISFALCISCILIKSLKILLAFSFDPKLQNFLKCAYKPITIVFICTGIQVIICTFWLIFRTPFVKQNFSIPRAIILECNEGSVVAFGIMLGYIAALAFICFICAFKGRKLPENYNEAKFITFGMLIYFIAWIVFIPVYVTTFGKY
294486	Query_809	12-contig_12397_1	651	gi|118088741|ref|XP_419833.2|PREDICTED: transcription regulator protein BACH2 [Gallus gallus]	XP_419833	824	1	1145.57	2962	0	58	651	80	665	0	0	581	583	8	594	KDVTVRGFGPLLQFAYTAKLLLSRENIQEVIHCAEFLRMHNLEDSCFSFLQTQLLNNEDGLFLCKKDTTCQRMHDEENSDGDEEETMESETSKISCPRERMHQEPFNFETTVAGADKGEGILPNSDMLRDSKDNLDKDAVTRYPRYKKYQLACTKNVYNTSHISTSGFASTFSEESSGNGLKSGLAMGQIKSEPQNEENDEESITLCLSGDEPDIRDKEGDVEMDRKQTSPTCVDRPKSGSSPSCLRSFFNRTKS	EEVTVRGFGPLLQFAYTAKLLLSRENIQEVIHCAEFLRMHNLEDSCFSFLQTQLLNNEDGLFLCKKDTTCQRMHDEENSDGDEEETMESETSKISCPRERMHQEPFNFETAVAGADKGEGILPNSDMLRDSKDNLDKDAVTRYPRYKKYQLACTKNVYNTSHISTSGFASTFSEESSGNGLKSGLAMGQIKSEPQNEENDEESITLCLSGDEPDIRDKEGDVEMDRKQPSPTCVDRPKSGSSPSCLRSFFNRTKS	++VTVRGFGPLLQFAYTAKLLLSRENIQEVIHCAEFLRMHNLEDSCFSFLQTQLLNNEDGLFLCKKDTTCQRMHDEENSDGDEEETMESETSKISCPRERMHQEPFNFET VAGADKGEGILPNSDMLRDSKDNLDKDAVTRYPRYKKYQLACTKNVYNTSHISTSGFASTFSEESSGNGLKSGLAMGQIKSEPQNEENDEESITLCLSGDEPDIRDKEGDVEMDRKQ SPTCVDRPKSGSSPSCLRSFFNRTKS
108901	Query_950	2-contig_13709_1	930	gi|118088804|ref|XP_419888.2|PREDICTED: protein FAM135A isoform 3 [Gallus gallus]	XP_419888	1500	1	1608.19	4163	0	1	924	262	1251	0	0	826	857	74	994	MTKELPSSHRIELENIDVEVRLSELCEEVKKMENPDELAELINMNLAQLCSLLMALWGQFLE---------AITLQEEVT-------------------ALLAQEHHTLRMILKHLQKCP--------------------------------------SSSHFLSLKFLV--NLPRSESNKLDRFEAEEGFVAGFTSPELKIRPAGASSLWHSENEKMLTKSSKAKNEDANKPKVKVTKLMKTMKPENTKKVVKQ	ITKELPSSHRIELENIDVEVRLSELCEEVKKMENPDELAELINMNLAQLCSLLMALWGQFLEVITLQEEVTALLAQEHHTLRVRRFAEAFFCLEHPRQAALAYQELHAQ----SHLQMCTAIKNTSFCSSLPPLPIECSELDGDTNSLPIIFEDRYLDSVTEDMDVPWLVVQNLPRSESNKLDKIEAEEGFVAGFTSPELKIRPAGASSLWHSENEKMLTKSLKGKNEDANKPKVKVTKLMKTMKPENTKKVVKQ	+TKELPSSHRIELENIDVEVRLSELCEEVKKMENPDELAELINMNLAQLCSLLMALWGQFLE A+ QE T AL QE H HLQ C S + + + +LV NLPRSESNKLD+ EAEEGFVAGFTSPELKIRPAGASSLWHSENEKMLTKS K KNEDANKPKVKVTKLMKTMKPENTKKVVKQ
166942	Query_670	10-contig_5747_1	1577	gi|118088810|ref|XP_419834.2|PREDICTED: uncharacterized protein LOC421810 [Gallus gallus]	XP_419834	2019	1	1687.55	4369	0	425	1390	985	1950	0	0	871	907	4	968	DLIPESTVVICPSKNLSKEVNKENQKPLSLSDARLEIESQLSISSDEIEEGEIVSSDEDEEKSKSEGHSENPKMSRSKT-PETRNLTSSPQNQKNKTIHCNEDNGKFVSVKVSTKNRERHKNRTFRSPKEMKKNKTVSLTCLEKIVQVIVEPSNVQEIMQMLRAIRKQMRKNYMKFKVHFPVQHFHRIIESGIINFTSLIKHLNFSKMSTSGETLKWSICDIIESKLKQVKKNAIVDRLFEQQVSDMKKRLWKFV	DLIPEGTVVICPSKNLSKEVNKENQKPLSLSDAHIEIESQLSISSDEIEEGEIISSDEDEEKSKSEGHSENPQKSRPKTSPETRNLTSSPRNQKNKTIHCNEDNGKIVSVKVSTKNRAKHKNQTFRSSKEMKKNKTVSITCLEKIVQVIIEPSNVQEIMQMLRAIRKQMRKNYMKFKVHFPVQHFHRIIESAIINFTSLIKHLNFSKMSTSGETLKLNICDIIESKLKQVKKNAIVDRLFEQQVLDMKKRLWKFV	DLIPE TVVICPSKNLSKEVNKENQKPLSLSDA +EIESQLSISSDEIEEGEI+SSDEDEEKSKSEGHSENP+ SR KT PETRNLTSSP+NQKNKTIHCNEDNGK VSVKVSTKNR +HKN+TFRS KEMKKNKTVS+TCLEKIVQVI+EPSNVQEIMQMLRAIRKQMRKNYMKFKVHFPVQHFHRIIES IINFTSLIKHLNFSKMSTSGETLK +ICDIIESKLKQVKKNAIVDRLFEQQV DMKKRLWKFV
202050	Query_402	9-contig_5747_1	997	gi|118088810|ref|XP_419834.2|PREDICTED: uncharacterized protein LOC421810 [Gallus gallus]	XP_419834	2019	1	1261.13	3262	0	9	804	140	935	0	0	664	709	4	798	HRLSEFPHHRSNFTRANLPGSTNGRCSEMCKTKDYKFRSSDLGDSIKMDHRMKNDCSKDTYPSYSSHSVENGKTSSDKRNTPCVSRYSPEELCSDGTHTCPPNHDHISNKDNKKEKKETKSDEQHTRGNVNKCKREVHQSTGNS-ICKNTNSEEGSSDPHQKLKAHSEKGSKNELQQKNQSVKVKCSPPMERKAEKSVSSWDKQTTGKDRSQARGELHAGERSLNVMKKDIKMHDKDEKNFGQKIKPNEKVQEQS	QRLSEFPSHRSSFTRANLPGSTNGRCSEMCKTKDYKFRSSDLGDSIKADHRMKNDCSKDTYHSYSSHSVENGKSSSDKRNTPHAVRYPPEELCSDGTHTCPPNHDHSSNKDNKKEKKETKSDEEYSRRNVNKYKREVHQSTGNSGICNNTDSEERNSDPHQKLKAHSEKTSKNELQQKNQSIKVKCSPSTERKVEKSVSSWDKQTTGKDRCQARGELYAGERSLNVTKKDIKMHDKDEKNSSQKIKPNEKLQEQS	RLSEFP HRS+FTRANLPGSTNGRCSEMCKTKDYKFRSSDLGDSIK DHRMKNDCSKDTY SYSSHSVENGK+SSDKRNTP RY PEELCSDGTHTCPPNHDH SNKDNKKEKKETKSDE+++R NVNK KREVHQSTGNS IC NT+SEE +SDPHQKLKAHSEK SKNELQQKNQS+KVKCSP ERK EKSVSSWDKQTTGKDR QARGEL+AGERSLNV KKDIKMHDKDEKN QKIKPNEK+QEQSR
17303	Query_1059	2-contig_15638_1	786	gi|118089022|ref|XP_426210.2|PREDICTED: potassium voltage-gated channel subfamily F member 1 [Gallus gallus]	XP_426210	487	1	865.529	2235	0	129	566	1	438	0	0	415	421	0	438	MAGDFRFPDADTDVTEKNEETEIVVNVGGVRQVFYRDNLNQYPETRLAELLNCLSGGYDSIFSLCDDYDPGKREFYFDRDPDAFKCIIDVYYFGEIHMKKGICPICFKNEMEFWKVDLKFLDDCCKTHLSEKKEELEEIARRVQLILDDLGVDASESRWKRCQKYIWKFLEKPESSYPARVIAVLSFLFILTSSVVMCVGTIPDMQVVDAEGNRVEHPTLDSIETACIGWFTMEYVLRLISSPNKLHFALSFMNI	MAGDFRFPDADTDVTEKNEETEIVVNVGGVRQVFYSDNLNQYPETRLAELLNCLSGGYDSIFSLCDDYDPGKREFYFDRDPDAFKCIIDVYYFGEIHMKKGICPICFKNEMEFWKVDLKFLDDCCKTHLSEKKEELEEIARRVQLILDDLGVDASESRWKRCQKYIWKFLEKPESSYPARVIAVLSFLFILISSVVMCVGTIPDMQVLDAEGNRVEHPTLDSIETACIGWFTMEYVLRLISSPNKLHFALSFMNI	MAGDFRFPDADTDVTEKNEETEIVVNVGGVRQVFY DNLNQYPETRLAELLNCLSGGYDSIFSLCDDYDPGKREFYFDRDPDAFKCIIDVYYFGEIHMKKGICPICFKNEMEFWKVDLKFLDDCCKTHLSEKKEELEEIARRVQLILDDLGVDASESRWKRCQKYIWKFLEKPESSYPARVIAVLSFLFIL SSVVMCVGTIPDMQV+DAEGNRVEHPTLDSIETACIGWFTMEYVLRLISSPNKLHFALSFMNI
62656	Query_1097	1-contig_18850_1	525	gi|118089141|ref|XP_420012.2|PREDICTED: N-acetyltransferase ESCO2 [Gallus gallus]	XP_420012	679	1	729.939	1883	0	35	474	53	495	0	0	367	393	3	443	FETPVKRRTLSSAESLKKSRDRWFPSQIKWSPGSSNEESSAVSVKPAPLRRLDVSPPQAASIPTAARGEISTELSPKPAASYQPIVPVQSFYSKEKRYLTLLERKQLAESSASGEMGSYKNPLAASRTEKVNVN-SRNRSSKPARPSASSRHGKTAPKALKKVKANVPPKKPSAGKENTNCLIKKKMDSPFRVLSMTVKPALRLQSGAAFFSSSKKSHSKKPPLDLKSLQGPPSSRSADANKNLEADGALRSTSV	FETPVKRRVLGFAASLKKSRARWFSSQIKWSPGSSDEESGAVAVKPAPLRRLDVSPLQAASIPSAARRELSSQLSPKPAASYQPAVPVVSFYSKEKQYLTILERKQLSETGAFGERGSCKSPLVASRTEKVNVNVSRNMSSKPARPVAASKHGKTAPKALKKVKADVPPKKPSVGKENTHCLIKKKMDSPFRVLSMTVKPALRLQSGAAFFSASKRSHSKKPPLDLKPLQSPPRSHSADANKNLEAGGALRSTSV	FETPVKRR L A SLKKSR RWF SQIKWSPGSS+EES AV+VKPAPLRRLDVSP QAASIP+AAR E+S++LSPKPAASYQP VPV SFYSKEK+YLT+LERKQL+E+ A GE GS K+PL ASRTEKVNVN SRN SSKPARP A+S+HGKTAPKALKKVKA+VPPKKPS GKENT+CLIKKKMDSPFRVLSMTVKPALRLQSGAAFFS+SK+SHSKKPPLDLK LQ PP S SADANKNLEA GALRSTSV
170050	Query_280	9-contig_1593_1	3755	gi|118089314|ref|XP_426247.2|PREDICTED: methionyl-tRNA synthetase, mitochondrial [Gallus gallus]	XP_426247	572	1	793.112	2047	0	15	414	172	571	0	0	373	384	0	400	RLLCANGEIVHWTKEENYMFKLSAFQDPLLKWLRDNPRAISPDPFYQRVLCWLGEDLPDLSVSRERSRLQWGIPVPSDSTQTIYVWVDALVNYLSVLGYPETHGEWWPAARHVVGKDILKFHAVYWPALLMAAGLSPPERILVHSHWTVRGQKMSKSLGNVIDPFACNERYTVDGFRYFLLRQGVPDRDCDYYDEKVVKVVNSELADALGGLLNRSTAPGINPSNTYPCFSETCFPKVVDYREAEALGRAAAEDY	KVSVESGHEVHWTKEENYMFKLSAFQDPLQKWLRDNPRAICPEPFYQRVLCWLGEDLPDLSISRERSRLQWGIPVPSDSTQTIYVWVDALVNYLSVLGYPETHGEWWPAAHHVVGKDILKFHAVYWPALLMAAGLSPPERIFVHSHWTVRGQKMSKSLGNVIDPFACNERYTVDGFRYFLLRQGVPERDCDYYDEKVVKVVNSELVDALGGLLNRSTAPGINPSNTYPCFSETCFPKVVDYRETEALGRAAAEDY	++ +G VHWTKEENYMFKLSAFQDPL KWLRDNPRAI P+PFYQRVLCWLGEDLPDLS+SRERSRLQWGIPVPSDSTQTIYVWVDALVNYLSVLGYPETHGEWWPAA HVVGKDILKFHAVYWPALLMAAGLSPPERI VHSHWTVRGQKMSKSLGNVIDPFACNERYTVDGFRYFLLRQGVP+RDCDYYDEKVVKVVNSEL DALGGLLNRSTAPGINPSNTYPCFSETCFPKVVDYRE EALGRAAAEDY
53918	Query_710	22-contig_1718_1	496	gi|118089423|ref|XP_426268.2|PREDICTED: FERM domain-containing protein 7 [Gallus gallus]	XP_426268	693	1	677.937	1748	0	1	495	258	693	0	0	381	391	63	497	MASRDACKAFWKTCVEYHAFFRLSEEPKSKPKALLCSKGSSFRYSGRTQRQLLEHGRKAKMKSLPFERYWEVCGRAGTRWGPSTHPYTRPCRKHYASHYDERQCRSSPDLLTDVSKQVWPCGVGVGQLEAALYPNSSPALPPGTHTALPLQVEELRLAYGGCGSFRTASGVHTSEPTLDSHHRGSTTEMMFAAELERSRAEAAPTFLPHSKSSSAFPLLYAQLELERAWEPTEPFGSRNPLTSFRPHHKFAGSSR	MASRDACKAFWKTCVEYHAFFRLSEEPKSKPKALLCSKGSSFRYSGRTQRQLLEHGRKAKMKSLPFE------------------------RKHYASHYDERQCRSSPDLLTDVSK----------------------------------QVEELRLAYGSCGSFRTASGVHTSEPTLDSRHSGSATAMMFAAELERFKPEVAPTFLPHSKSSSAFPLLYAQLELERAWEPTDSFSSRNPLTSFRPHHKFTGSSR	MASRDACKAFWKTCVEYHAFFRLSEEPKSKPKALLCSKGSSFRYSGRTQRQLLEHGRKAKMKSLPFE RKHYASHYDERQCRSSPDLLTDVSK QVEELRLAYG CGSFRTASGVHTSEPTLDS H GS T MMFAAELER + E APTFLPHSKSSSAFPLLYAQLELERAWEPT+ F SRNPLTSFRPHHKF GSSR
231172	Query_422	52-contig_10327_1	994	gi|118090314|ref|XP_420621.2|PREDICTED: Bardet-Biedl syndrome 12 protein [Gallus gallus]	XP_420621	713	1	1212.98	3137	0	47	731	1	685	0	0	592	633	0	685	MAFRAVNSRRHIGLQQLSSLAWAGRTLLGPMKSCKFVVDESTNESVLICSAARLMESLDLTSAAGQLLNETIQAQNKEFKTGMSTLLFLVGAWSNAVLECLQQNVPVSAIVSVMSEGLDSCCEKVQCLQISVHDVNKELCCGSVRPSTSESKASQIPCDSFLNHQIFLCFQKDISASEGLVPGNSCFPQEADCNFNKDLVLPLASFGSEASLVRSVNDKSTSVVSVNGVSASSCKQKKLTHSRYFSTLAKSHVSS	MAFRAVNSRRHIGLQQLSSLAWAGRTLLGPMKACKFVVDESTDESMLICSAVRLMESLDLTSAAGQLLNETIQAQSKEFKTGMSTLLFLVGAWSNAILECLQQNVPVSAIVSVMSEGLDSCCEKVQCLQVSVHDVNKELCSSSVRPSASESKASQIPCGSSLNRQIYLCFQKDISASEELVPRNSYFPQEADCNFNKGLVWPLASFGSVASLVRSVDDGSTSVISGSGVSASICKQKKLTHSRYFSPGAKSHVSS	MAFRAVNSRRHIGLQQLSSLAWAGRTLLGPMK+CKFVVDEST+ES+LICSA RLMESLDLTSAAGQLLNETIQAQ+KEFKTGMSTLLFLVGAWSNA+LECLQQNVPVSAIVSVMSEGLDSCCEKVQCLQ+SVHDVNKELC SVRPS SESKASQIPC S LN QI+LCFQKDISASE LVP NS FPQEADCNFNK LV PLASFGS ASLVRSV+D STSV+S +GVSAS CKQKKLTHSRYFS AKSHVSS
2973	Query_511	16-contig_50089_1	2318	gi|118090742|ref|XP_420806.2|PREDICTED: uncharacterized protein KIAA0232 [Gallus gallus]	XP_420806	1400	1	2059.65	5335	0	1207	2266	174	1233	0	0	1049	1055	0	1060	YYEAFPPLSEKPVCLQEIMTVWNKSKVCSYSSSSSSSTAPPTSTDTSSPKDCNSESEVTKDRSNKVPAAVHERTQQKKSKNEKENKFSNNAVEDKPVLYKKQVRHKSEGKMRPRSWSSGSSEAGSSSSGNQGEYKASMKCIKVRHKTREVRNKKGRNGQSRLAVKSGEKAERKVHSGSSSSSSSGSIKQLCKRGKRPLKEIGRKEAGGNDGKDLYIDSRNEKEYKEEPLWYTEPITEYFVPLSRKSKLETTYRNR	YYEAFPPLSEKPVCLQEIMTVWNKSKVCSYSSSSSSSTAPPTSTDTSSPKDCNSESEVTKDRSNKVPAAVHERTQQKKSKNEKENKFSNNAVEDKPVLYKKQVRHKSEGKMRPRSWSSGSSEAGSSSSGNQGEYKASMKCIKVRHKTREVRNKKGRNGQSRLAVKSGEKADRKVHSGSSSSSSSGSVKQLCKRGKRPLKEIGRKEAGGNDGKDLYIDSRNEKEYKEEPLWYTEPITEYFVPLSRKSKLETTYRNR	YYEAFPPLSEKPVCLQEIMTVWNKSKVCSYSSSSSSSTAPPTSTDTSSPKDCNSESEVTKDRSNKVPAAVHERTQQKKSKNEKENKFSNNAVEDKPVLYKKQVRHKSEGKMRPRSWSSGSSEAGSSSSGNQGEYKASMKCIKVRHKTREVRNKKGRNGQSRLAVKSGEKA+RKVHSGSSSSSSSGS+KQLCKRGKRPLKEIGRKEAGGNDGKDLYIDSRNEKEYKEEPLWYTEPITEYFVPLSRKSKLETTYRNR
336038	Query_227	23-contig_15676_1	1478	gi|118091715|ref|XP_421178.2|PREDICTED: sodium/calcium exchanger 3 isoform 4 [Gallus gallus]	XP_421178	919	1	1161.75	3004	0	73	634	1	562	0	0	561	562	0	562	MAWLSLQPLTSAFLHFGLVTFVLFLHGLQVDAGLTGDSTSSVQNSSCSGSFDCKEGVILPIWYPENPSLGDKIARVIVYFVALIYMFLGVSIIADRFMASIEVITSQEKEITIKKPNGETTTTTIRIWNETVSNLTLMALGSSAPEILLSLIEVCGHGFIAGDLGPSTIVGSAAFNMFIIIAICVYVIPDGETRKIKHLRVFFVTAAWSIFAYIWLYMILAVFSPGVVQVWEGLLTLFFFPLCVLLAWIADRRLL	MAWLSLQPLTSAFLHFGLVTFVLFLHGLQVDAGLTGDSTSSVQNSSCSGSFDCKEGVILPIWYPENPSLGDKIARVIVYFVALIYMFLGVSIIADRFMASIEVITSQEKEITIKKPNGETTTTTIRIWNETVSNLTLMALGSSAPEILLSLIEVCGHGFVAGDLGPSTIVGSAAFNMFIIIAICVYVIPDGETRKIKHLRVFFVTAAWSIFAYIWLYMILAVFSPGVVQVWEGLLTLFFFPLCVLLAWIADRRLL	MAWLSLQPLTSAFLHFGLVTFVLFLHGLQVDAGLTGDSTSSVQNSSCSGSFDCKEGVILPIWYPENPSLGDKIARVIVYFVALIYMFLGVSIIADRFMASIEVITSQEKEITIKKPNGETTTTTIRIWNETVSNLTLMALGSSAPEILLSLIEVCGHGF+AGDLGPSTIVGSAAFNMFIIIAICVYVIPDGETRKIKHLRVFFVTAAWSIFAYIWLYMILAVFSPGVVQVWEGLLTLFFFPLCVLLAWIADRRLL
274551	Query_636	24-contig_21246_1	528	gi|118092173|ref|XP_426464.2|PREDICTED: brain-enriched guanylate kinase-associated protein [Gallus gallus]	XP_426464	923	1	652.514	1682	0	41	417	451	827	0	0	347	358	4	379	ILMCTLLSYPLYHLSLLQLPSDFQERVSIHLEKHGCSLSVPLCHTSYADSIPTCVIAKVLEKPDPNSLSSHLSSPSTRDLNFQDSAGKLGQRPQYKSDIYCSDTALYCPEERRRERRPSVDTQVKDVGFLRSQNSTDSTVEEDGFHSSFSHEAFPEYITSLPTSSSYSSFSVTSEEKENAQANTMTASQQAIYMSNRDELFERKSPAGYEHQGSPRFAKSKPAQHMELADDNENSPTFTRTLPPYANEPFHFSAI	LLQCSK-NYDRAH-KLSELPSDFQERVSIHLEKHGCSLSVPLCHTSYADTIPTCVIAKVLEKPDPNSLSSHLSSPSTRDLNFQDSAGKLGQRPQYKSDIYCSDTALYCPEERRRERRPSVDTQVKDVGFLRSQNSTDSTVEEDGFHSSFSHEAFPEYITSLPTSSSYSSFSVTSEEKENAQANTMTASQQAIYMSNRDELFERKSPAGYEHQGSPRFAKSKPAQHMELADDNENSPTFTRTLPPYANEPFHFSAI	+L C+ +Y H L +LPSDFQERVSIHLEKHGCSLSVPLCHTSYAD+IPTCVIAKVLEKPDPNSLSSHLSSPSTRDLNFQDSAGKLGQRPQYKSDIYCSDTALYCPEERRRERRPSVDTQVKDVGFLRSQNSTDSTVEEDGFHSSFSHEAFPEYITSLPTSSSYSSFSVTSEEKENAQANTMTASQQAIYMSNRDELFERKSPAGYEHQGSPRFAKSKPAQHMELADDNENSPTFTRTLPPYANEPFHFSAI
243433	Query_1060	1-contig_11075_1	1206	gi|118093388|ref|XP_421906.2|PREDICTED: E3 ubiquitin-protein ligase HECW2 [Gallus gallus]	XP_421906	1566	1	2154.41	5581	0	48	1205	211	1299	0	0	1064	1070	69	1158	MSIQPGKKSTFPTFAHHGQERRSTIISNTTNPVWHREKYSFVALLTDVLEIEVKDKFAKSRPIIKRFLGKLTIPVQRLLERHAIGDQVLSYNLGRRLPADHVSGYLQFKVEITSSVHEDASPETVGTLLGVNSVNGDLGSPSDDEDMPAGHHDTSTVCSNGPVLEESSGETIQRHPLRTSTTLETDQDELTSGASRSSPTRGRQDSLNDYLDAIEHSNHPRPGTSACGERPRGASPKLRSSFPTDTRLNAMLHID	MSIQPGKKSTFPTFAHHGQERRSTIISNTTNPVWHREKYSFVALLTDVLEIEVKDKFAKSRPIIKRFLGKLTIPVQRLLERHAIGDQILSYNLGRRLPADHVSGYLQFKVEITSSVHEDASPETVGTLLGVNSVNGDLGSPSDDEDMPTGHHDTSTVCSNGPILEESSGETIQRHPLRTSTTLETDQDELTSGASRSSPTRGRQDSLNDYLDAIEHNNHPRPGTSACGERPRGASPKLRSSFPTDTRLNAMLHID	MSIQPGKKSTFPTFAHHGQERRSTIISNTTNPVWHREKYSFVALLTDVLEIEVKDKFAKSRPIIKRFLGKLTIPVQRLLERHAIGDQ+LSYNLGRRLPADHVSGYLQFKVEITSSVHEDASPETVGTLLGVNSVNGDLGSPSDDEDMP GHHDTSTVCSNGP+LEESSGETIQRHPLRTSTTLETDQDELTSGASRSSPTRGRQDSLNDYLDAIEH+NHPRPGTSACGERPRGASPKLRSSFPTDTRLNAMLHID
158668	Query_732	14-contig_10924_1	364	gi|118093428|ref|XP_421940.2|PREDICTED: alsin [Gallus gallus]	XP_421940	1649	1	709.138	1829	0	1	364	1	365	0	0	348	353	1	365	MDSQERSSEEAEGAKERGLVYTWRAGSCSVTPERLPGLSGKTVLQAALGTNHGLLLTDGGEVYSFGNLPWRSGPEEFYAN-PILENALLGQHVITVAAGSFHNGAVTEGGVVYMWGNNSSGQCAVANQPCVPEPQPISISDSETSPLLSVRILQLACGEEHTLALSLSREIWAWGSGCQLGLITTTFPVTKPQKVEHLAGRVVLQIACGAYHSLALVQCLPVQEMKPIPERCNHCSQLLITMTDKEDHVIISDSH	MDSQERSSEEAEGAKERGLVYTWRAGSCSVTPERLPGLCGKTVLQAALGTNHGLLLTEGGEVYSFGKLPWRSGPEEFCANSPILENTLLGQHVITVAAGSFHNGAVTEGGVVYMWGNNSSGQCAVANQPYVPEPQPISISDSETSPLLSVRVLQLACGEEHTLALSLSREIWAWGSGCQLGLITTTFPVTKPQKVEHLAGRVVLQIACGAYHSLALVQCLPVQEMKPIPERCNHCSQLLITMTDKEDHVIISDSH	MDSQERSSEEAEGAKERGLVYTWRAGSCSVTPERLPGL GKTVLQAALGTNHGLLLT+GGEVYSFG LPWRSGPEEF AN PILEN LLGQHVITVAAGSFHNGAVTEGGVVYMWGNNSSGQCAVANQP VPEPQPISISDSETSPLLSVR+LQLACGEEHTLALSLSREIWAWGSGCQLGLITTTFPVTKPQKVEHLAGRVVLQIACGAYHSLALVQCLPVQEMKPIPERCNHCSQLLITMTDKEDHVIISDSH
239163	Query_797	14-contig_1800_1	1828	gi|118093597|ref|XP_426582.2|PREDICTED: kelch-like protein 23 [Gallus gallus]	XP_426582	558	1	689.108	1777	0	663	1054	1	390	0	0	344	353	10	396	MALPGQEDYTFAYRDSSHPVCLMNAFRTFYLDGLFTDIALQAASGVLLHCHRAVLAACSSYFKAMFTADMKEKSKNHIRLPELSHAVLEALVNYAYTSQIQITKRNVQSLLQAADLLQFVSVKRACEQFLVRHLDADNCLGMHAFAEHHNCLELEKESRRMLLWQFEEVWKQEEFLDVSKEKLAFILSRENLNVWKEEAAVGAVVRWVAHNVEERIEDIYELLSCISLDLDNVYLRSALSLQKKCRLNENKIRSL	MALPGQEDYVFAYRDSSHPVCLLDAFRAFYLDGLFTDIALQAASGVLLHCHRAVLAACSSYFRAMFTADMKEKSKNQIRLPELSHAVLEALVNYAYTSQIQITKRNVQSLLQAADLLQFVSVKRACEQFLIRHLDADNCLGMHAFAEHHNCLELEKESRRMLLWQFEEVWKQEEFLDVSKEKLAFILSRENLNVWKEEAAVGAVVRWVAHNVEERIEDIYELLSCIKLDLDNVYLRSALSLQKKCRLNDNKIRSL	MALPGQEDY FAYRDSSHPVCL++AFR FYLDGLFTDIALQAASGVLLHCHRAVLAACSSYF+AMFTADMKEKSKN IRLPELSHAVLEALVNYAYTSQIQITKRNVQSLLQAADLLQFVSVKRACEQFL+RHLDADNCLGMHAFAEHHNCLELEKESRRMLLWQFEEVWKQEEFLDVSKEKLAFILSRENLNVWKEEAAVGAVVRWVAHNVEERIEDIYELLSCI LDLDNVYLRSALSLQKKCRLN+NKIRSL
265051	Query_674	76-contig_11242_1	792	gi|118093690|ref|XP_426585.2|PREDICTED: fidgetin [Gallus gallus]	XP_426585	773	1	1456.04	3768	0	71	785	23	737	0	0	711	712	0	715	LGLKMQWTPEHAQWPEQHFDITSTTRSPAHKVEAYRGHLQRTYQYAWANDDISALTASNLLKKYAEKYSGILEGPTERPILSNYTEAPSGLVNGRKNESEPWQPSLNSESVYPMNCVPDVITASKAGVSAALPPADVSASIGSSPGVASNLAEPSYSSSTCGSHTVPSLHSGLPSQEYAAGYNGSYLHTSYSGQPAPALPSPHPSPLHSSGLLQPPPPPPPPPALVPGYNGTSNLSGYSYPSATYPPQTAVGPGY	VGLKMQWTPEHAQWPEQHFDITSTTRSPAHKVEAYRGHLQRTYQYAWANDDISALTASNLLKKYAEKYSGILEGPAERPILSNYTEAPSGLVNGRKNESEPWQPSLNSESVYPMNCVPDVITASKAGVSAALPPADVSASIGSSPGVASNLAEPSYSSSTCGSHTVPSLHSGLPSQEYAAGYNGSYLHTSYSGQPAPALPSPHPSPLHSSGLLQPPPPPPPPPALVPGYNGTSNLSSYSYPSATYPPQTAVGPGY	+GLKMQWTPEHAQWPEQHFDITSTTRSPAHKVEAYRGHLQRTYQYAWANDDISALTASNLLKKYAEKYSGILEGP ERPILSNYTEAPSGLVNGRKNESEPWQPSLNSESVYPMNCVPDVITASKAGVSAALPPADVSASIGSSPGVASNLAEPSYSSSTCGSHTVPSLHSGLPSQEYAAGYNGSYLHTSYSGQPAPALPSPHPSPLHSSGLLQPPPPPPPPPALVPGYNGTSNLS YSYPSATYPPQTAVGPGY
51170	Query_630	2-contig_2965_1	1096	gi|118094178|ref|XP_001233342.1|PREDICTED: probable G-protein coupled receptor 52 [Gallus gallus]	XP_001233342	361	1	647.892	1670	0	620	935	1	316	0	0	311	314	0	316	MNRSRWIEWRTLNMSGSVVNVSEHLSCALGFGHYNAVDVCILETVVIVLLTFLIIAGNLTVIFVFHCAPLLHHYTTSYFIQTMAYADLFVGVSCLVPTLSLLHYSTGVHESLTCQVFGYIISVLKSVSMACLACISVDRYLAITKPLSYNQLVTPCRLRICIILIWIYSCLIFLPSFFGWGKPGYHGDIFEWCATSWLTNAYFTGFIVCLLYAPAAFVICFTYFHIFKICRQHTKEINDRRARFPSHEVDAAGET	MNRSRWIEWRTLNMSGSVVNLSEHLSCPLGFGHYNAVDICILETVVIVLLTFLIIAGNLTVIFVFHCAPLLHHYTTSYFIQTMAYADLFVGVSCLVPTLSLLHYSTGVHESLTCQVFGYIISVLKSVSMACLACISVDRYLAITKPLSYNQLVTPCRLRICIILIWIYSCLIFLPSFFGWGKPGYHGDIFEWCATSWLTNAYFTGFIVCLLYAPAAFVICFTYFHIFKICRQHTKEINDRRARFPSHEVDAAGET	MNRSRWIEWRTLNMSGSVVN+SEHLSC LGFGHYNAVD+CILETVVIVLLTFLIIAGNLTVIFVFHCAPLLHHYTTSYFIQTMAYADLFVGVSCLVPTLSLLHYSTGVHESLTCQVFGYIISVLKSVSMACLACISVDRYLAITKPLSYNQLVTPCRLRICIILIWIYSCLIFLPSFFGWGKPGYHGDIFEWCATSWLTNAYFTGFIVCLLYAPAAFVICFTYFHIFKICRQHTKEINDRRARFPSHEVDAAGET
373456	Query_787	4-contig_27450_1	803	gi|118094340|ref|XP_422353.2|PREDICTED: leucine-rich repeat-containing protein 8C [Gallus gallus]	XP_422353	802	1	1639.78	4245	0	1	802	1	802	0	0	796	799	0	802	MIPVTEFRQFSEQQPAFRVLKPWWDVFTDYLSVAMLMIGVFGCTLQVMQDKIICLPKRVQPCQNQSNSSHVISTIPDTTPLPPLKPSTPPATVEMKGLKTDLDLQQYSFINQVCYERALHWYAKYFPYLVLIHTLVFMLCSNFWFKFPGSSSKIEHFISILGKCFDSPWTTRALSEVSGEDSEEKDNRKNNISKSNTTQPSAEGTLVKTQSLKSIPEKLVVDKGTHGALDKKEGEQAKALFEKVKKFRLHVEEGD	MIPVTEFRQFSEQQPAFRVLKPWWDVFTDYLSVAMLMIGVFGCTLQVMQDKIICLPKRVQPCQNQSNTSHVISTIPDTTPLPPPKPSTPPATVEMKGLKTDLDLQQYSFINQVCYERALHWYAKYFPYLVLIHTLVFMLCSNFWFKFPGSSSKIEHFISILGKCFDSPWTTRALSEVSGEDSEEKDNRKNNVSKSNTTQPSTEGTLVKTQSLKSIPEKLVVDKGTHGALDKKEGEQAKALFEKVKKFRLHVEEGD	MIPVTEFRQFSEQQPAFRVLKPWWDVFTDYLSVAMLMIGVFGCTLQVMQDKIICLPKRVQPCQNQSN+SHVISTIPDTTPLPP KPSTPPATVEMKGLKTDLDLQQYSFINQVCYERALHWYAKYFPYLVLIHTLVFMLCSNFWFKFPGSSSKIEHFISILGKCFDSPWTTRALSEVSGEDSEEKDNRKNN+SKSNTTQPS EGTLVKTQSLKSIPEKLVVDKGTHGALDKKEGEQAKALFEKVKKFRLHVEEGD
188753	Query_733	13-contig_1903_1	675	gi|118094543|ref|XP_422429.2|PREDICTED: E3 ubiquitin-protein ligase HECTD3 [Gallus gallus]	XP_422429	845	1	942.569	2435	0	6	458	107	559	0	0	449	453	0	453	QEQLEEYKSGCDLEEGWVLVCKHAEGGDRLVPVESTERIQRQQQLFGVDYKPLIRWEQVVDLTYSLRLGAKPKPMEQDEAAVEKLRFVPPTWTYECDEDLVHFLYDHIGKEDENLGSVKQYVDSIDVSSYTEDFNVSCLTDSHADTYWESDGSQGQHWVRLNMKKGTIVKKLLLTVDTTDENFMPKRVAVYGGEGDNLKKLNDVGIDESYIGDVCVLEDMTTHLPVIEIRIVECRDDGIDVRLRGIKIKSSRQRD	KEQLEEYKSGCDLEEGWVLVCKHAEGGDRLVPVESTERIQRQQQLFGVDYKPVIRWEQVVDLTYSLRLGAKPKPMDQDEAAVEKLRFVPPTWTYECDEDLVHFLYDHIGKEDENLGSVKQYVDSIDVSSYTEDFNVSCLTDSHADTYWESDGSQGQHWVRLNMKKGTIVKKLLLTVDTTDENFMPKRVAVYGGEGDNLKKLNDVGIDESYIGDVCVLEDMTTHLPVIEIRIVECRDDGIDVRLRGIKIKSSRQRD	+EQLEEYKSGCDLEEGWVLVCKHAEGGDRLVPVESTERIQRQQQLFGVDYKP+IRWEQVVDLTYSLRLGAKPKPM+QDEAAVEKLRFVPPTWTYECDEDLVHFLYDHIGKEDENLGSVKQYVDSIDVSSYTEDFNVSCLTDSHADTYWESDGSQGQHWVRLNMKKGTIVKKLLLTVDTTDENFMPKRVAVYGGEGDNLKKLNDVGIDESYIGDVCVLEDMTTHLPVIEIRIVECRDDGIDVRLRGIKIKSSRQRD
228306	Query_397	5-contig_25051_1	654	gi|118094580|ref|XP_001234343.1|PREDICTED: carnitine O-palmitoyltransferase 2, mitochondrial [Gallus gallus]	XP_001234343	652	1	1112.83	2877	0	1	598	1	630	0	0	542	561	32	630	MAARRLVLRRAVVPCWRRAYSSAGTAEFLHRSIVPTMHYQKSLPR-------------------------YRGTLRCESSWQSGGMLLLCSDLFLD-------SVFSGPWFDMYLKAREPVVLNFNAFMSFNPDPKSEYNDQLTRATNMTVSAIRFMKTFRAGYLEPEVFHLNPEKSDTQLFKKIIRFVPSSLSWFGAYMVNAYPLDMSQYFRLFNSTRLPKLDRDELYTDEKAKHLLVLRKGNFYVFDVIDRDG	MAARQLAVGRVVLGCWRRAYSSAGAAEFLHRSIVPTMHYQKSLPRLPVPKLEDTIRRYLNAQKPLLNDDQFRKTEELAHQFEKGIGRELHEQLVAQDNQNKHTSYITGPWFDMYLKAREPVVLNFNAFMSFNPDPKSEYNDQLIRATNMTVSAIRFMKTFRAGYLEPEVFHLNPEKSDTQLFKKIIRFVPSSLSWFGAYMVNAYPLDMSQYFRLFNSTRLPKLNRDELYTDEKAKHLLVLRKGNFYIFDVLDKDG	MAAR+L + R V+ CWRRAYSSAG AEFLHRSIVPTMHYQKSLPR +R T ++ G L L S +GPWFDMYLKAREPVVLNFNAFMSFNPDPKSEYNDQL RATNMTVSAIRFMKTFRAGYLEPEVFHLNPEKSDTQLFKKIIRFVPSSLSWFGAYMVNAYPLDMSQYFRLFNSTRLPKL+RDELYTDEKAKHLLVLRKGNFY+FDV+D+DG
237980	Query_366	27-contig_5469_1	437	gi|118094824|ref|XP_001231870.1|PREDICTED: uracil nucleotide/cysteinyl leukotriene receptor isoform 2 [Gallus gallus]	XP_001231870	344	1	685.641	1768	0	25	368	1	344	0	0	329	336	0	344	MKGPADPSSLLFNCSNQSNFALETSEQCGKETHLENVLFATFYFLDFILAFIGNSLALWLFIRDQKSGTPANIFLMHLAVADLSFVLVLPTRLVYHFSGNHWPFGEIPCRLTGFLFYLNMYASIYFLMCISVDRFLAIVHPVKSIKLRRPLYAHMACAFLWLIVGVAMAPLLLSVQTVEMNNTTICLQLYREKASRHALVSLAVAFTFPFVTTVTCYLLIIRSLKSGNRVEKHLKEKAIKMIIMVLMIFLICFVP	MKGPADPSSLLFNCSNQSNFPFETSEQCGKETHLENVLFATFYFLDFILAFIGNSLALWLFVRDQKSGTPANIFLMHLAVADLSFVLVLPTRLVYHFSGNHWPFGEIPCRLTGFLFYLNMYASIYFLMCISVDRFLAIVHPVKSIKLRRPLYAHLACAFLWLIVGVAMAPLLLSVQTVEVNNTTICLQLYREKASRHALVSLAVAFTFPFVTTVTCYLLIIRSLKSGNRVEKHLKEKAIKMIIMVLMIFLVCFVP	MKGPADPSSLLFNCSNQSNF ETSEQCGKETHLENVLFATFYFLDFILAFIGNSLALWLF+RDQKSGTPANIFLMHLAVADLSFVLVLPTRLVYHFSGNHWPFGEIPCRLTGFLFYLNMYASIYFLMCISVDRFLAIVHPVKSIKLRRPLYAH+ACAFLWLIVGVAMAPLLLSVQTVE+NNTTICLQLYREKASRHALVSLAVAFTFPFVTTVTCYLLIIRSLKSGNRVEKHLKEKAIKMIIMVLMIFL+CFVP
183931	Query_207	1-contig_3295_1	441	gi|118095012|ref|XP_422618.2|PREDICTED: uncharacterized protein KIAA1486-like [Gallus gallus]	XP_422618	715	1	673.315	1736	0	16	396	167	547	0	0	370	374	0	381	SSMSAKPRPHSDEYTKKIPPPKPKRNPNTQLSTSFDETYIKKHGPMKTPLTRDASLSQVSSPAPDTEEEEPVYIEMVGNILRDFKKDEDDQSEAVYEEMKYPIFDDVGQDSKCQCEYDHHTCSSQCATPTVPDLDFTKTSVPSTPKGLLCDIPPPFPNLLSHRPPLLVFPPAPVQCSPNSDESPLTPLEVTKLPVLENVSYIKQQAGASPSSLPPHTPGHQKLEKEQMVSHGTSTPGHTSSPPHPSTLYRTQSPH	TEVSAKPRPHSDEYTKKIPPPKPKRNPNTQLSTSFDETYIKKHGPMKTPLTRDASLSQVSSPAPDTEEEEPVYIEMVGNILRDFKKDEDDQSEAVYEEMKYPIFDDVGQDSKCQCEYDHHTCSSQCATPTVPDLDFTKTSVPSTPKGLLCDIPPPFPNLLSHRPPLLVFPPAPVQCSPNSDESPLTPLEVTKLPVLENVSYIKQQAGASPSSLPPHTPGHQKLEKEQMVSHGTSTPGHTSSPPHPSTLYRTQSPH	+ +SAKPRPHSDEYTKKIPPPKPKRNPNTQLSTSFDETYIKKHGPMKTPLTRDASLSQVSSPAPDTEEEEPVYIEMVGNILRDFKKDEDDQSEAVYEEMKYPIFDDVGQDSKCQCEYDHHTCSSQCATPTVPDLDFTKTSVPSTPKGLLCDIPPPFPNLLSHRPPLLVFPPAPVQCSPNSDESPLTPLEVTKLPVLENVSYIKQQAGASPSSLPPHTPGHQKLEKEQMVSHGTSTPGHTSSPPHPSTLYRTQSPH
22865	Query_824	1-contig_11799_1	447	gi|118095141|ref|XP_422725.2|PREDICTED: choline-phosphate cytidylyltransferase A [Gallus gallus]	XP_422725	367	1	674.47	1739	0	105	446	17	367	0	0	330	336	9	351	DGAGWNPSK---NVPALIRK------EPAPFSDEVEIDYSKPYIRVTYEEAMRGTPLDRPVRVYADGIFDLFHSGHARALMQAKNLFPNTYLIVGVCSDELTHNFKGFTVMNENERYDAVQHCRYVDEVVRNAPWTLTPEFLAEHRIDFVAHDDIPYSSAGSDDVYKHIKEAGMFAPTQRTEGISTSDIITRIVRDYDVYARRNLQRGYTAKELNVSFINEKKYHLQERVDKVKKRVKDVEEKSKEFVQKVEEKS	DGSGPNGATELDGIPAKMSRRSFGLREPAPFSDEVEIDYSKPYIRVTYEEAMRGTPLDRPVRVYADGIFDLFHSGHARALMQAKNLFPNTYLIVGVCSDELTHNFKGFTVMNENERYDAVQHCRYVDEVVRNAPWTLTPEFLAEHRIDFVAHDDIPYSSAGSDDVYKHIKEAGMFAPTQRTEGISTSDIITRIVRDYDVYARRNLQRGYTAKELNVSFINEKKYHLQERVDKVKKRVKDVEEKSKEFVQKVEEKS	DG+G N + +PA + + EPAPFSDEVEIDYSKPYIRVTYEEAMRGTPLDRPVRVYADGIFDLFHSGHARALMQAKNLFPNTYLIVGVCSDELTHNFKGFTVMNENERYDAVQHCRYVDEVVRNAPWTLTPEFLAEHRIDFVAHDDIPYSSAGSDDVYKHIKEAGMFAPTQRTEGISTSDIITRIVRDYDVYARRNLQRGYTAKELNVSFINEKKYHLQERVDKVKKRVKDVEEKSKEFVQKVEEKS
148018	Query_1114	15-contig_6201_1	1178	gi|118095475|ref|XP_413718.2|PREDICTED: zinc finger protein 609 [Gallus gallus]	XP_413718	1416	1	1567.75	4058	0	1	813	327	1139	0	0	799	804	0	813	MLVVNVTWRNKTYVGTLLDCTQHDWAPPRFCDSPTSDLEMRNGRGRGKRMRPNSNTPVNETAAASDSKGTSNSSKTRAGANSKGRRGSQNSSDHRTPPSGTAEDVKASPSSVTKRKSKPLSDMELNSSSEDSKGSKRIRTNSMGSAAVPPTAVKVEPAVLDRNCPSPILIDCPHPNCNKKYKHINGLKYHQAHAHTDDDSKLEADVDSEYGEEPSLHADVGSCNGAAVSQKGSLSPARSATPKVRLMEPHSPSPS	MLVVNVTWRNKTYVGTLLDCTQHDWAPPRFCDSPTSDLEMRNGRGRGKRMRPNSNTPVNETAATSDSKGTSNSSKTRAGANSKGRRGSQNSSDHRTPPSGTAEDVKASPSSVTKRKSKPLSDMELNSSSEDSKGSKRIRTNSMGSAAVPPTAVKVEPTVLDRNCPSPILIDCPHPNCNKKYKHINGLKYHQAHAHTDDDSKLEADVDSEYGEEPSLHTDVGSCNGATVSQKGSLSPARSATPKVRLMEPHSPSPS	MLVVNVTWRNKTYVGTLLDCTQHDWAPPRFCDSPTSDLEMRNGRGRGKRMRPNSNTPVNETAA SDSKGTSNSSKTRAGANSKGRRGSQNSSDHRTPPSGTAEDVKASPSSVTKRKSKPLSDMELNSSSEDSKGSKRIRTNSMGSAAVPPTAVKVEP VLDRNCPSPILIDCPHPNCNKKYKHINGLKYHQAHAHTDDDSKLEADVDSEYGEEPSLH DVGSCNGA VSQKGSLSPARSATPKVRLMEPHSPSPS
321111	Query_1098	2-contig_30294_1	2682	gi|118095559|ref|XP_001233273.1|PREDICTED: immunoglobulin superfamily containing leucine-rich repeat protein [Gallus gallus]	XP_001233273	422	1	835.484	2157	0	688	1109	1	422	0	0	410	415	0	422	MGPLLCCLGIAVLLCRGLACPGPCSCSTKKNGRLLAECAYKELPEVPRGLSPNVTILTLSANRIVWLRRGAFAEVPEVQSLWLGYNQIGGAEPGAFATLVELKNLDLSHNKMVTFPWQDLRNLSGLQILKLNNNRLAGLPRDAFQALVELRSLWLNDNQLTTLADGTFHPLPSLSQLQLFNNPFNCSCKLFWLKRWAESTSVSLTKGGSTLCAAPGRLRGRAVTDIPSQQCVAPSVQLTYLSKLDNTVLPDGLTL	MGPLLCCLGIAVLLCRGLACPGPCSCSTKKNGRLLAECAYKELPEVPRGLSPNVTILTLSANRIGWLRRGAFAEVPEVQSLWLGYNQIGGAEPGAFATLSQLKNLDLSHNKMVTFPWQDLRNLSGLQILKLNNNRLAGLPRDAFQALAELRSLWLNDNQLTTLADGTFHPLPSLSQLQLFNNPFNCSCKLFWLKRWAESTSVSLTKGGSTLCAAPGRMRGRAVTDIPAHQCVAPSVQLTYLSKLDNTVLPDGLTL	MGPLLCCLGIAVLLCRGLACPGPCSCSTKKNGRLLAECAYKELPEVPRGLSPNVTILTLSANRI WLRRGAFAEVPEVQSLWLGYNQIGGAEPGAFATL +LKNLDLSHNKMVTFPWQDLRNLSGLQILKLNNNRLAGLPRDAFQAL ELRSLWLNDNQLTTLADGTFHPLPSLSQLQLFNNPFNCSCKLFWLKRWAESTSVSLTKGGSTLCAAPGR+RGRAVTDIP+ QCVAPSVQLTYLSKLDNTVLPDGLTL
206537	Query_654	27-contig_21210_1	1023	gi|118095640|ref|XP_425063.2|PREDICTED: C2 calcium-dependent domain-containing protein 4C [Gallus gallus]	XP_425063	431	1	698.738	1802	0	526	956	1	431	0	0	397	412	4	433	MWFLDRIRASQGSGNLPCASFLGLPPSQHLLEKARLGSAAFPNVLTPDRIPEFCIPPRLS-AAPAQGPSSRQHHGLEDAHPASSDHSSNASLPHFIQVESAEEIPALEEEGTNSDPQSQAALSLPHFPRAPTSYGFCTLLESPHTRRKESIFHGDTCGALPSLTLPRSRANTFSGKGNASNPIAISFTSVRLPSKHVSLRRQGACDSDTASSSDSSPFSSPLLSRSPPRSCSLIKTRSQEGLLCRALKAKNKSGM	MWFLDKIRASQGSGNLPRASFLGLPPSQHLLEKARLGAAAFPNVLTPDRIPEFCIPPRLSTAAPAQGPGSRQRHGSGDAHLSSSDHSTSSSLPHFIQVESAEEIPALEEEGTNSDPQSQAALSLPHFPRAPTSYGFCTLLESPHTRRKESIFHGDTCGALPSLTLPRSRANTFGGKGSTSNPIAISFTSVRLPPRH--LHRQGACDSDTASSSDSSPFSSPLLSRSPPRSCSLMKARSQEGLLCRALKAKNKSGM	MWFLD+IRASQGSGNLP ASFLGLPPSQHLLEKARLG+AAFPNVLTPDRIPEFCIPPRLS AAPAQGP SRQ HG DAH +SSDHS+++SLPHFIQVESAEEIPALEEEGTNSDPQSQAALSLPHFPRAPTSYGFCTLLESPHTRRKESIFHGDTCGALPSLTLPRSRANTF GKG+ SNPIAISFTSVRLP +H L RQGACDSDTASSSDSSPFSSPLLSRSPPRSCSL+K RSQEGLLCRALKAKNKSGM
198381	Query_811	47-contig_9454_1	1001	gi|118095651|ref|XP_413766.2|PREDICTED: OTU domain-containing protein 7A [Gallus gallus]	XP_413766	913	1	860.907	2223	0	317	794	449	907	0	0	449	456	19	478	LKLMSKFQAPLAQPESPTASAGEDVQSLADSMDSDRDSICSNSNGSNGKNSKEKEKEKQRKDKDKNRTDSVANKIGSLSKTLGIKLKKNMGGLGGLVHGKMSRANSGNGKNGDTIEKVKEKKSKSRKGSKEESGQSASTSPSEKTTPSPTDRASNSPIEKMNTKSFSDKQTDPWKYSTDVKLSLNILRAAMQGERKFIFAGLLLTSHRHQFHEEMIGYYLTSAQERFNAEQEQKRKDAEKKAALSGSSSRKLEPE	IRIPSETRAPLAQPESPTASAGEDVQSLADSMDSDRDSICSNSNGSNGKNSKEKEKDKQRKDKDKNRTDSVANKIGSLSKTLGIKLKKNMGGLGGLVHGKMSRANSGNGKNGDTIEKVKEKKSKSRKGSKEESGH-------------------NSPIEKMNTKSFSDKQTDPWKYSTDVKLSLNILRAAMQGERKFIFAGLLLTSHRHQFHEEMIGYYLTSAQERFNAEQEQKRKDAEKKAALNGSSSRKLEPE	+++ S+ +APLAQPESPTASAGEDVQSLADSMDSDRDSICSNSNGSNGKNSKEKEK+KQRKDKDKNRTDSVANKIGSLSKTLGIKLKKNMGGLGGLVHGKMSRANSGNGKNGDTIEKVKEKKSKSRKGSKEESG NSPIEKMNTKSFSDKQTDPWKYSTDVKLSLNILRAAMQGERKFIFAGLLLTSHRHQFHEEMIGYYLTSAQERFNAEQEQKRKDAEKKAAL+GSSSRKLEPE
146013	Query_95	5-contig_16894_1	774	gi|118096400|ref|XP_414133.2|PREDICTED: rhophilin-2 [Gallus gallus]	XP_414133	679	1	687.567	1773	0	167	550	249	672	0	0	347	358	58	433	ADLMDLRQETFTHTPSYDMSPAMLNVLVKMMLAQAQECAFEQIGLPGIRNEFFTLVKMTQEVAKVGEVYMMVNTAMTQEPVRENIPYSWSKLVQIKSDHYRALAHYFLATILCDHELQSSDDEDQQEKAFSQLYDSVPEGLMVRTILKDKVQRKQLDSSVSNFFSGKAHLRKAIVYHEEALRVCGLCKKLRNIEVLQEVLTAAHKRSLLKYAQQETEDDFLSLIQAPDILPKTEHKVETIAPQFSKVKVKDFFHR	AGVLSYLKETFTHTPSYDMSPAMLNVLVKMMLAQAQECAFEQISLPGIRNEFFTLVKMTQEVAKVGEVYMMVNTAVTQEPVKENIPYSWSKLVQIKADHYRALAHYFLATILCDHELQSSDDEDQQEKALSQLYDYVPEGVMILTILKDKVQRKQL---------GKAHLRKAIVYHEEALRVCGLCKKLRNIEVLLEVLTAAHKRSLLKYAQQETEDDFLSLIQAPDILPKTEHKVEMVAPQFSKVKVKDLFHR	A ++ +ETFTHTPSYDMSPAMLNVLVKMMLAQAQECAFEQI LPGIRNEFFTLVKMTQEVAKVGEVYMMVNTA+TQEPV+ENIPYSWSKLVQIK+DHYRALAHYFLATILCDHELQSSDDEDQQEKA SQLYD VPEG+M+ TILKDKVQRKQL GKAHLRKAIVYHEEALRVCGLCKKLRNIEVL EVLTAAHKRSLLKYAQQETEDDFLSLIQAPDILPKTEHKVE +APQFSKVKVKD FHR
99133	Query_352	18-contig_7154_1	408	gi|118096763|ref|XP_425150.2|PREDICTED: glycerate kinase-like [Gallus gallus]	XP_425150	505	1	726.087	1873	0	1	407	98	504	0	0	364	385	0	407	MLLKSHSRIQVFEGARNNLPDSEALKGANAIRELAEGLTADDLLLVLISGGGSALLPAPIPPILLEEKEQLTKMLASRGAAIQELNTVRKMLSLLKGGGLARLAYPAQVVSLILSDVIGDPLDIIASGPTAASSHSVQDCLQILTKYNLLHSLPRSVQTVLSSSATKPTAAEHHSHVCNVVIGSNALALAEAKRQAEGLGYATLILSAAVCGDVGCVAELYCQLIRLLCLHTAGPAEGPQGTEVRGNLLQLAAEL	MLLKPHSRIQVIEGAKNNLPDPEALRGASAIQELAEGLTADDLLLVLISGGGSALLPAPIPPILLEEKEKLTKMLASRGAAIQELNTVRKILSLLKGGGLARLAYPAQVVSLILSDVIGDPLDIIASGPTAASSHSVQDCLQILAKYNLLHSLPGSVEAVLSSSPTKPTAAKDYSHVCNIIIGSNTLALAEAKRQAEGLGYVTLILSAGVCGDVGRVAVLYCQLICLLCLRLAGLGEGPRGSEVRGNLLQLAAEL	MLLK HSRIQV EGA+NNLPD EAL+GA+AI+ELAEGLTADDLLLVLISGGGSALLPAPIPPILLEEKE+LTKMLASRGAAIQELNTVRK+LSLLKGGGLARLAYPAQVVSLILSDVIGDPLDIIASGPTAASSHSVQDCLQIL KYNLLHSLP SV+ VLSSS TKPTAA+ +SHVCN++IGSN LALAEAKRQAEGLGY TLILSA VCGDVG VA LYCQLI LLCL AG EGP+G+EVRGNLLQLAAEL
257191	Query_137	6-contig_30297_1	1111	gi|118096838|ref|XP_414322.2|PREDICTED: protein tyrosine phosphatase domain-containing protein 1 [Gallus gallus]	XP_414322	781	1	755.747	1950	0	656	1043	242	629	0	0	373	381	0	388	SVLVACYLVFATRMTADQAILFVRAKRPNSIQTRGQLLCIREFTQFLIPLRNVFACCEPKAHTVTLSQYLTRQRHLLHGYESRHLKHVPKLIHLVCKLLLDLAENRQVIEAELLDIADLSAEIEKTVSQLVSTQLDGDLARQDSDTSDSSHTHTATCDTQDSLFSLAHECDPLWKRRNAECLQPLSHVRRRLSYSDSDLRRTEFLLEQGETAWTVPAQILLCNKLKQNSGEESSATDEKKPQLDLNKEALVRNTC	GVLVACYLVFATRMTADQAILFVRAKRPNSIQTRGQLLCIREFTQFLIPLRNVFACCEPKAHRVTLSQYLTRQRHLLHGYESRHLKHVPKLIHIVCKLLLDLAENRQVVEAELLDIADLSAEIEKTVSQLVSTQLDGDLARQDSDMSDSSHTHSATCDTQDSLFSLAHECDPLWKRRNVECLQPLSHVRRRLSYSDSDLRRTEFLLEQGETAWTVPAQILLCNKLKQNSSEESSATDEQKPQLDLNKEALVRNTC	VLVACYLVFATRMTADQAILFVRAKRPNSIQTRGQLLCIREFTQFLIPLRNVFACCEPKAH VTLSQYLTRQRHLLHGYESRHLKHVPKLIH+VCKLLLDLAENRQV+EAELLDIADLSAEIEKTVSQLVSTQLDGDLARQDSD SDSSHTH+ATCDTQDSLFSLAHECDPLWKRRN ECLQPLSHVRRRLSYSDSDLRRTEFLLEQGETAWTVPAQILLCNKLKQNS EESSATDE+KPQLDLNKEALVRNTCT
328193	Query_1021	90-contig_388_1	811	gi|118097094|ref|XP_414432.2|PREDICTED: E3 ubiquitin-protein ligase PDZRN3 [Gallus gallus]	XP_414432	1060	1	1021.15	2639	0	284	810	534	1060	0	0	505	514	0	527	SINFSCLLIFTKKHEEDGGTTDTATILSNQHEKDSGVGRTDDSTRNDESSEQENNADDHTTSSNTLGSQKKLTYSHDTLGSGDMQFSNESFISADCTDVDFLGIPVDECERFRELLELKCQVKSASPYSLYYHTSTLDMSKSDQESVDKELEMLNEELRNIELECLNIVRAHKMQQLKDQYREPWMLHNSGFRNYNTSIDVRRHELSDITELPEKSDKDSSSAYNTGESCRSTPLTLEISPDNSLRRTAESINCQ	AMQFTASMLQQKKHEEDGGTTDTATILSNQHEKDSGVGRTDDSTRNDESSEQENNADDHTTSSNTLGSQKKLTYSHDTLGSGDMQFSNESFISADCTDVDFLGIPVDECERFRELLELKCQVKSANPYSLYYHTSTLDMSKSDQESVDKELEMLNEELRNIELECLNIVRAHKMQQLKDQYREPWMLHNSGFRNYNTSIDVRRHELSDITELPEKSDKDSSSAYNTGESCRSTPLTLEISPDNSLRRTAEGINCQ	++ F+ ++ KKHEEDGGTTDTATILSNQHEKDSGVGRTDDSTRNDESSEQENNADDHTTSSNTLGSQKKLTYSHDTLGSGDMQFSNESFISADCTDVDFLGIPVDECERFRELLELKCQVKSA+PYSLYYHTSTLDMSKSDQESVDKELEMLNEELRNIELECLNIVRAHKMQQLKDQYREPWMLHNSGFRNYNTSIDVRRHELSDITELPEKSDKDSSSAYNTGESCRSTPLTLEISPDNSLRRTAE INCQ
326931	Query_793	2-contig_10964_1	2251	gi|118097287|ref|XP_425195.2|PREDICTED: beta-2 adrenergic receptor [Gallus gallus]	XP_425195	397	1	656.366	1692	0	1	315	79	393	0	0	308	313	0	315	MGLGVVPFGACHIIMDMWKFGNFWCEFWTSLDVLCVTASIETLCVIAVDRYFAITSPFKYQSLLTKSKARVVILVVWAISALTSFLPIQMHWYRADHNEAILCYEKDTCCYFFTNQAYAIASSIISFYLPLVVMVFVYARVFQVAKKQLQKIDRSEGRFHIQNKEQDQNGKAGHRRSSKFFLKEHKALKTLGIIMGTFTLCWLPFFIVNIVHVIQDDIIPQYVYVLLNWLGYVNSAFNPLIYCRSPDFRYAFQEL	MGLGVVPFGACHIIMEMWKFGNFWCEFWTSLDVLCVTASIETLCVIAVDRYFAITSPFKYQSLLTKSKARVVILVVWAISALTSFLPIQMHWYRADRDEAILCYEKDTCCDFFTNQAYAIASSIISFYLPLVVMVFVYARVFQVAKKQLQKIDQSEGRFHIQNKEQDQNGKAGHRRSSKFFLKEHKALKTLGIIMGTFTLCWLPFFIVNIVHVIQDDIIPKYVYILLNWLGYVNSAFNPLIYCRSPDFRYAFQEL	MGLGVVPFGACHIIM+MWKFGNFWCEFWTSLDVLCVTASIETLCVIAVDRYFAITSPFKYQSLLTKSKARVVILVVWAISALTSFLPIQMHWYRAD +EAILCYEKDTCC FFTNQAYAIASSIISFYLPLVVMVFVYARVFQVAKKQLQKID+SEGRFHIQNKEQDQNGKAGHRRSSKFFLKEHKALKTLGIIMGTFTLCWLPFFIVNIVHVIQDDIIP+YVY+LLNWLGYVNSAFNPLIYCRSPDFRYAFQEL
194814	Query_549	9-contig_820_1	733	gi|118097479|ref|XP_414600.2|PREDICTED: vascular endothelial growth factor receptor 3 [Gallus gallus]	XP_414600	1380	1	694.501	1791	0	13	349	859	1195	0	0	331	334	0	337	LLIGKVLGHGAFGKVVEASAFGINKSNSCETVAVKMLKEGATASEHKALMSELKILIHIGNHLNVVNLLGACTKPNGPLMVIVEFCKYGNLSNYLRTKREGFSPYREKSPRLRIQVQSIVEAVRADRRSRSGTSDSAIFNRFLMHKGQTAQPIQEVDDLWQSPLTMEDLICYSFQVARGMEFLASRKCIHRDLAARNILLSENNVVKICDFGLARDIYKDPDYVRKGSARLPLKWMAPESIFDKVYTTQSDVWSF	LRLGKVLGHGAFGKVVEASAFGINKSNSCETVAVKMLKEGATASEHKALMSELKILIHIGNHLNVVNLLGACTKPNGPLMVIVEFCKYGNLSNYLRTKREGFSPYREKSPRLRIQVQSIVEAVRADRRSRSGTSDSAIFNRFLMHKSQTAQPIQEVDDLWQSPLTMEDLICYSFQVARGMEFLASRKCIHRDLAARNILLSENNVVKICDFGLARDIYKDPDYVRKGSARLPLKWMAPESIFDKVYTTQSDVWSF	L +GKVLGHGAFGKVVEASAFGINKSNSCETVAVKMLKEGATASEHKALMSELKILIHIGNHLNVVNLLGACTKPNGPLMVIVEFCKYGNLSNYLRTKREGFSPYREKSPRLRIQVQSIVEAVRADRRSRSGTSDSAIFNRFLMHK QTAQPIQEVDDLWQSPLTMEDLICYSFQVARGMEFLASRKCIHRDLAARNILLSENNVVKICDFGLARDIYKDPDYVRKGSARLPLKWMAPESIFDKVYTTQSDVWSF
215063	Query_352	6-contig_820_1	891	gi|118097479|ref|XP_414600.2|PREDICTED: vascular endothelial growth factor receptor 3 [Gallus gallus]	XP_414600	1380	1	1478.38	3826	0	154	884	52	782	0	0	718	724	0	731	QGQHPLEWSWPGGKVEPSGKEKETEFMASAAPSRGRAIREEDCEGTGTKPYCKVLVLTESQANDTGYYRCYYKYIDAKIEGTTAVSAYVFVRDFEHPFINKPETLLISKKENTWVPCLVSIPDLNVTLVSQNSLIHPDRKAIFWDNKKGMQVPTQLIRDSLFVQCETVIDKKVFKSSFFIIHIAGIELYDIQLYPKKAMELLVGEKLVLNCTVWAEFNSGVRFQWTYPGKQMQRAVIESERRSLQTHTELSSILT	RGQHPLEWSWPGGKVDPRGKEKEMEFMASAAPSGGRAIREEDCEGTGTKPYCKVLVLTESQANDTGYYRCYYKYIDAKIEGTTAVSAYVFVRDFEQPFINKPETLLISKKENTWVPCLVSIPDLNVTLISQNSLIHPDRKAIFWDNKKGMQVPTQLIRDSLFVQCETVIDKKVFKSNFFIIHIAGIELYDIQLYPKKAMELLVGEKLVLNCTVWAEFNSGVRFQWTYPGKQMQRAVIESERRSLQTHTELSSILT	+GQHPLEWSWPGGKV+P GKEKE EFMASAAPS GRAIREEDCEGTGTKPYCKVLVLTESQANDTGYYRCYYKYIDAKIEGTTAVSAYVFVRDFE PFINKPETLLISKKENTWVPCLVSIPDLNVTL+SQNSLIHPDRKAIFWDNKKGMQVPTQLIRDSLFVQCETVIDKKVFKS+FFIIHIAGIELYDIQLYPKKAMELLVGEKLVLNCTVWAEFNSGVRFQWTYPGKQMQRAVIESERRSLQTHTELSSILT
2308	Query_511	1-contig_16146_1	676	gi|118098020|ref|XP_414880.2|PREDICTED: amiloride-sensitive sodium channel subunit gamma [Gallus gallus]	XP_414880	650	1	1222.61	3162	0	65	675	1	650	0	0	589	599	41	651	MAPGKKITARIKKTLPVRGPQAPTLRELMRWYCLNTNTHGCRRIVVSRGRLRRFIWILLTLSAVGLIIWQCAELLLNYYSASVSVTVQFQKLPFPAVTICNINPYKYSSMKGYLSELDKETKKALETFYGFSEGKSKVRRAAGDWNNSESLFFTQIPLLRFEDSSRTATDLHSGRKRKVEGSVFHKDSSIVNSGDSNDIIGFQLCDANNSSECALYTFSSGVNAIQEWYKLHYMNIMAQIPLETKEELSYSAEDL	MAPGK-ITARIKKTLPVRGPQAPTLRELMRWYCLNTNTHGCRRIVVSRGRLRRFIWILLTLSAVGLILWQCAELLLNYYSASVSVTVQFQKLPFPAVTICNINPYKYSSMKDYLSELDKETKKALETFYGFSEGKTKVRRAAGDWNGTESLFFRHVPLLRFENSFRAATDLRSGRKRKVEGSVFHKDSSIVNSGDSNDIIGFQLCDANNSSECALYTFSSGVNAIQEWYKLHYMNIMAQIPLETKEELSYSADDL	MAPGK ITARIKKTLPVRGPQAPTLRELMRWYCLNTNTHGCRRIVVSRGRLRRFIWILLTLSAVGLI+WQCAELLLNYYSASVSVTVQFQKLPFPAVTICNINPYKYSSMK YLSELDKETKKALETFYGFSEGK+KVRRAAGDWN +ESLFF +PLLRFE+S R ATDL SGRKRKVEGSVFHKDSSIVNSGDSNDIIGFQLCDANNSSECALYTFSSGVNAIQEWYKLHYMNIMAQIPLETKEELSYSA+DL
253132	Query_1028	3-contig_5841_1	1181	gi|118098077|ref|XP_425252.2|PREDICTED: glutamate [NMDA] receptor subunit epsilon-1 [Gallus gallus]	XP_425252	1458	1	1190.64	3079	0	479	1057	863	1441	0	0	570	576	0	579	GIYSCIHGVHIEEKKKSPDFTLTNSQTNMLKLLRTAKNMTNINPSRINSPKRTADFIQRGSLIMDMVMDKGNLIFSDNRSFQTKDNFFGENMSELQALPGNRHKDNLNNYVFQGQHPLTLNESNPNTVEVAVTTEAKVNSRPRQLWRKSVESLRQESVRQSQGSQRENGSDENRQLSVKSQRYLPEEIVHSDVSETSSRATCHMEPENNNKHHKTKDNFKKRTVASKYPKDCSDVELTYLKTKQSSPRDKIYTID	GIYSCIHGVHIEEKKKSPDFTLTNSQTNMLKLLRTAKNMTNMNPSRINSPKRTADFIQRGSLIMDMVMDKGNLIFSDNRSFQTKDNFFGENMSELQTLPGNRHKDNLNNYVFQGQHPLTLNESNPNTVEVAVTTEAKVNSRPRQLWRKSVESLRQESVRQGQGSQRENGSEENRQLSVKSQRYLPEEIVHSDVSETSSRATCHMEPENNNKHHKTKDNFKKRTVASKYPKDCSEVELTYLKTKQSSPRDKIYTID	GIYSCIHGVHIEEKKKSPDFTLTNSQTNMLKLLRTAKNMTN+NPSRINSPKRTADFIQRGSLIMDMVMDKGNLIFSDNRSFQTKDNFFGENMSELQ LPGNRHKDNLNNYVFQGQHPLTLNESNPNTVEVAVTTEAKVNSRPRQLWRKSVESLRQESVRQ QGSQRENGS+ENRQLSVKSQRYLPEEIVHSDVSETSSRATCHMEPENNNKHHKTKDNFKKRTVASKYPKDCS+VELTYLKTKQSSPRDKIYTID
339246	Query_604	1-contig_28436_1	866	gi|118098087|ref|XP_414920.2|PREDICTED: eukaryotic elongation factor 2 kinase [Gallus gallus]	XP_414920	725	1	1064.68	2752	0	163	812	1	689	0	0	550	568	133	736	MADEDLIFRMEGIDNARLPEVSSGNYLDADSDDEDSYYICPITDDPVSNKPVSSKVDNYYSSLAKTEQFSSSSSPRNSFNFKNDTQHRSKHGSVVDRSRETWKHAIEKAKHMPDPWAEFHLEDIGTEHATRYSHSAESEIQKADCSLKGNAGSGKRKEVRKSESSEVAAGTPNKHFGNSQPFIWDASFPFVSCL--KKLSNFLHTQNWKAAYNYVAKRYIESVGREVYFEDVRLQMEAKLWGEEYNRHKPPKQVD	MADEDLIFRMEGIDNARLTEVTSGNYLDADSDDEDNYYICPITDDPVSNKSASSKVDNYYSNLAKTEQYGSSSSPRNSFNY-----------------RETWKHAIEKAKHMPDPWAEFHLEDIETEHATRYRYNAVTGDWVEDEVLIKMA---------------------------SQPFGRGA---MRECFRTKKLSNFLHTQNWKAAYNYVAKRYIESVGREVYFEDVRLQMEAKLWGEEYNRHKPPKQVD	MADEDLIFRMEGIDNARL EV+SGNYLDADSDDED+YYICPITDDPVSNK SSKVDNYYS+LAKTEQ+ SSSSPRNSFN+ RETWKHAIEKAKHMPDPWAEFHLEDI TEHATRY ++A + D L A SQPF A C KKLSNFLHTQNWKAAYNYVAKRYIESVGREVYFEDVRLQMEAKLWGEEYNRHKPPKQVD
8185	Query_159	2-contig_5429_1	709	gi|118098129|ref|XP_414944.2|PREDICTED: inactive rhomboid protein 1 [Gallus gallus]	XP_414944	853	1	900.968	2327	0	18	510	1	517	0	0	457	464	26	518	MSEARHDSTSSLQRKKPPWLKLDIPVPVPMPVPEEPVQPTRRQAFLRSVSMPADNSRVPSLPNEQTGTVSKKSDPACAGEPGGQEFPEKAAVPAPIIFQKWQRKSLRHCSLRYGKLKPQVIREMDLPSQDNISLTSTETPPPLYVGPCQLGMQKIIDPLARGRAFRMADDNDGYSIPHTPITPGATSLCSFTSSRSGFNRLPRRRKRESVAKMSFRAAAALVKGRSVKDSTLRRAQRRSFTPASFMEEDTVDFPD	MSEARHDSTSSLQRKKPPWLKLDIPVPMPVSVPEEPVQPTRRQAFLRSVSMPADNSRVPSLPHEVRRPVLQRQTSITQTIKRGTADWFGVSKDSDAT-QKWQRKSLRHCSLRYGKLKPQVIREMDLPSQDNISLTSTETPPPLYVGPCQLGMQKIIDPLARGRAFRMADDNDGYSIPHTPITPGATSLCSFTSSRSGFNRLPRRRKRESVAKMSFRAAAALVKGRSVKDSTLRRAQRRSFTPASFMEEDTVDFPD	MSEARHDSTSSLQRKKPPWLKLDIPVP+P+ VPEEPVQPTRRQAFLRSVSMPADNSRVPSLP+E V ++ G + + QKWQRKSLRHCSLRYGKLKPQVIREMDLPSQDNISLTSTETPPPLYVGPCQLGMQKIIDPLARGRAFRMADDNDGYSIPHTPITPGATSLCSFTSSRSGFNRLPRRRKRESVAKMSFRAAAALVKGRSVKDSTLRRAQRRSFTPASFMEEDTVDFPD
105487	Query_261	21-contig_11838_1	3171	gi|118098247|ref|XP_426858.2|PREDICTED: WAP, kazal, immunoglobulin, kunitz and NTR domain-containing protein 1 [Gallus gallus]	XP_426858	576	1	692.96	1787	0	2684	3025	81	417	0	0	328	332	5	342	DCEGFEKCCTNVCGLRSCVAARFADGSVLALELGRGPSCESFVCAQQGSDCDIWDGQPVCKCKDRCEKEPNFTCASDGLTYYNKCYMDAEACLRGTRLTTVPCKHIFTWPDTSPVPRETTARPTPGGGPELPVPPALYSNPFHQSVRAGGTVSFRCDVSGRPRPDITWEKQSDRAENFIMRPDQMYGNVVVTNIGQLVIYNARHEDAGIYTCTARNAAGLLRADFPLSVLKREPGVAPQPGSPQPGSPQPFPSAE	DCEGFEKCCTNVCGLRSCVAARFADGSLLALELGRGPSCESFVCAQQGSDCDIWDGQPVCKCKDRCEKEPNFTCASDGLTYYNKCYMDAEACLRGTRLTTVPCKHVFTWPDTSPVPRETTARPTPGAGPEPPVPPALYSNPFHQSVRAGGTVSFRCDVSGRPRPDITWEKQSDRAENFIMRPDQMYGNVVVTNIGQLVIYNARHEDAGIYTCTARNAAGLLRADFPLSVLKREPGAA-----PRPGSPQPFPGAE	DCEGFEKCCTNVCGLRSCVAARFADGS+LALELGRGPSCESFVCAQQGSDCDIWDGQPVCKCKDRCEKEPNFTCASDGLTYYNKCYMDAEACLRGTRLTTVPCKH+FTWPDTSPVPRETTARPTPG GPE PVPPALYSNPFHQSVRAGGTVSFRCDVSGRPRPDITWEKQSDRAENFIMRPDQMYGNVVVTNIGQLVIYNARHEDAGIYTCTARNAAGLLRADFPLSVLKREPG A P+PGSPQPFP AE
119522	Query_785	67-contig_1635_1	723	gi|118098457|ref|XP_415101.2|PREDICTED: transmembrane protein 132B-like [Gallus gallus]	XP_415101	1069	1	766.533	1978	0	338	705	686	1053	0	0	363	367	0	368	QEAIVSAWILFSDGSVTPLDIYDSKDFSITITSLDEMVVSVHQNLQSKWPGVVAEGDGQGPLIKIEMVISEPCQKTKRKSILAVGKGSVKVKFGQKDSDQKESTNDIDDTDKDFKSHASNSIEKNAEQERTAQEWSKNGVLSNHEDNANKSTTFISPIDQESLEDDQLQNNPTAFTGFPAQVEIPGENNPSDLTLTSRGLTDLEIGMYALLCVFCLAILVFLINCVAFAWKYRHKRFAVSEQGNIPHSHDWVWLG	QEAIVSAWILFSDGSVTPLDIYDSKDFSITITSLDEMVVSVHQNLQSKWPGVVAEGDGQGPLIKIEMVISEPCQKTKRKSILAVGKGSVKVKFGQKDSDQKESTNDIDDTDKDFKSHASNSIEKTAEQERTAQEWSKNGILSNHEDNANKSTTFVSPIDQESLEDDQLQNNPTAFTGFPAQVEIPGENNPSDLTLTTRGLTDLEIGMYALLCVFCLAILVFLINCVAFAWKYRHKRFAVSEQGNIPHSHDWVWLG	QEAIVSAWILFSDGSVTPLDIYDSKDFSITITSLDEMVVSVHQNLQSKWPGVVAEGDGQGPLIKIEMVISEPCQKTKRKSILAVGKGSVKVKFGQKDSDQKESTNDIDDTDKDFKSHASNSIEK AEQERTAQEWSKNG+LSNHEDNANKSTTF+SPIDQESLEDDQLQNNPTAFTGFPAQVEIPGENNPSDLTLT+RGLTDLEIGMYALLCVFCLAILVFLINCVAFAWKYRHKRFAVSEQGNIPHSHDWVWLG
72106	Query_782	4-contig_8851_1	6261	gi|118099808|ref|XP_425385.2|PREDICTED: BTB/POZ domain-containing protein 17-like [Gallus gallus]	XP_425385	483	1	738.799	1906	0	4703	5060	123	480	0	0	352	356	0	358	LRYLYCGGVSLLLHQAIPLHQLASKYRVWGLQRGVADYMRSHLASESSQGHVVGWYHYAARIGDAALQESCLQFLAWNLSSVLGSAEWASVSVELLLLLLERSDLVLHSELELYTAVEAWLARRQPEDAVAERVLRAIRYPMIAPSQLFRLQAQSAVLARHYGAVQDLLFQAFQFHAASPLHFAKYFDVNCSMFLPRNYLAPSWGSQWVINNPARDDRSTSFQTQLGPSSHDAGKRVTWNVLFSPRWLPVSLRPV	IRYLYCGGVSLLLHQAIPLHQLASKYRVWGLQRGVADYMRSHLASESSQGHVVGWYHYAARIGDAALQESCLQFLAWNLSSVLGSAEWASVSVELLLLLLERSDLVLHSELELYTAVEAWLARRQPEDAVAERVLRAIRYPMIAPSQLFRLQTQSAVLVRHYGAVQDLLFQAFQFHSASPLHFAKYFDVNCSMFLPRNYLAPSWGSQWVINNPARDDRSTSFQTQLGPSSHDSGKRVTWNVLFSPRWLPVSLRPV	+RYLYCGGVSLLLHQAIPLHQLASKYRVWGLQRGVADYMRSHLASESSQGHVVGWYHYAARIGDAALQESCLQFLAWNLSSVLGSAEWASVSVELLLLLLERSDLVLHSELELYTAVEAWLARRQPEDAVAERVLRAIRYPMIAPSQLFRLQ QSAVL RHYGAVQDLLFQAFQFH+ASPLHFAKYFDVNCSMFLPRNYLAPSWGSQWVINNPARDDRSTSFQTQLGPSSHD+GKRVTWNVLFSPRWLPVSLRPV
203682	Query_665	3-contig_3392_1	462	gi|118100419|ref|XP_415932.2|PREDICTED: smoothelin-like protein 2-like [Gallus gallus]	XP_415932	468	1	743.806	1919	0	1	461	1	468	0	0	380	392	75	502	MASEIDNLNSHEAQTVVEALGRYEDTLRGAVREIHVDIQVFKQGVSRQVDEVLRLASPLARTVSELQQENQRLRVQLERLARQVEALGRSAGMPPEWQEEAGRRSPPAVGHSSPVPAFSRDRFSALAKLAVSGRSQKLYMSIMEFISVFSKVCESLRLKVITCTHSLAVSVDLDDHHKPEFRRVFSSSIIENGHQPSSGHTKVSCELPSFHTPDSSPEAHAPAMTLQMPHLPVTAVTRISEKFSGETAHSAGTTN	MASEIDNLNSHEAKTVCEALGRYEDTLRGAVREIHVDIQVFKQGVSRQVDEVLRLASPLARTVSELQQENQRLRVQLERLARQVEALGRSAGLPQEWQEEA-ERSPPAVGPSSPVPAFSGDRFSTLAKLAVSGRSQ---------------------------------SVDLDDHHKPEFRRVFSSSLIENGHQSSSGQAKASHELTSFYMSDSSPEAHAPAMTLQMPHLPVTAVTRISEKFSGENIHSAGTTN	MASEIDNLNSHEA+TV EALGRYEDTLRGAVREIHVDIQVFKQGVSRQVDEVLRLASPLARTVSELQQENQRLRVQLERLARQVEALGRSAG+P EWQEEA RSPPAVG SSPVPAFS DRFS LAKLAVSGRSQ SVDLDDHHKPEFRRVFSSS+IENGHQ SSG K S EL SF+ DSSPEAHAPAMTLQMPHLPVTAVTRISEKFSGE HSAGTTN
212401	Query_5	1-contig_34203_1	579	gi|118100637|ref|XP_001234434.1|PREDICTED: protein-glutamine gamma-glutamyltransferase 6-like [Gallus gallus]	XP_001234434	706	1	809.29	2089	0	52	460	4	455	0	0	389	397	43	452	TGSHPATLGQLKPTHISWQPSVNASAHHTDRYANTELTVRRGQPFNITLYFNRQKYPGESLAFVTEIGPSPSESHRTRAVFNLSEVGPSGWSAVQGPSESGYMTFIITSPANAIIGRYNLILQVKSGNKIFSRFLGQFVILFNPWCPGDDVYIANENERQEYVLNENGIIFVGNAKYIEARGWFYGQ-------------------------------------------INGNDNDNGVLLGKWQGSFHSHENP	SGGLVNTTMELKPTHISWQPSVNASAHHTDRYANTELTVRRGQPFTITLYFNRQKYPGESLAFVTEIGPSPSESHRTRAVFNLSEVGASGWSAAQGPSESGYMTFIISSPANAIIGRYNLILQVNSGNKIFSRFLGQFVLLFNPWCPGDDVYIANENERQEYVLNENGIIFVGNAKYIEARGWYYGQFQDHLLNICLTMLDLSLYYRQDPAVDVSRRGDPKYVGRVISSMINGNDNDNGVLLGKWQGSFHSHENP	+G T +LKPTHISWQPSVNASAHHTDRYANTELTVRRGQPF ITLYFNRQKYPGESLAFVTEIGPSPSESHRTRAVFNLSEVG SGWSA QGPSESGYMTFII+SPANAIIGRYNLILQV SGNKIFSRFLGQFV+LFNPWCPGDDVYIANENERQEYVLNENGIIFVGNAKYIEARGW+YGQ INGNDNDNGVLLGKWQGSFHSHENP
111896	Query_335	17-contig_1526_1	2045	gi|118100744|ref|XP_417438.2|PREDICTED: peroxisomal proliferator-activated receptor A-interacting complex 285 kDa protein [Gallus gallus]	XP_417438	2818	1	2123.59	5501	0	530	1692	1093	2245	0	0	1028	1089	14	1165	VANPESLPVLSDFSLVSSGAGREFRVIIISTVHTSESLRVSASHNLEFFNEARVLNTIMTRAQSQVIVVGDAVALCSHGQCSKVWKRFIQVCIEKRSISPANLTMAQIKQAACDKEIWCRRSPEGNDEDSDTDSWSSETDSMNPDDPILQELLDESKNMLVTVSEEGLLNVKSEVSNQWEDRQEYVSFSSQVMQEYLHMHPKMYKRCELVKEGFDKASAFPLDDSPAVTIQIKGRVHCGTAFTGDEVLVEILQNS	VENYENLP------------GREFRVIIISTVHTSESLRVSASHNHEFFNEARVLNTIMTRAQSQVIVVGDAVALCSHGQCSKVWKRFIQECIEKGSISPANLTMAQIKQAACDKESWCRRSPEGNDEDSDTDSWSSETESMNPDDPILQELLDESKNVLVTVSEEGLLNVKSDTSNQWEDRQEYVSFSSQMMQKYLHMHPQMYKRCELVKEGFDKASAFPLDDSPAVTIQIKGRVHCGTAFTGDEVLVEILQNG	V N E+LP GREFRVIIISTVHTSESLRVSASHN EFFNEARVLNTIMTRAQSQVIVVGDAVALCSHGQCSKVWKRFIQ CIEK SISPANLTMAQIKQAACDKE WCRRSPEGNDEDSDTDSWSSET+SMNPDDPILQELLDESKN+LVTVSEEGLLNVKS+ SNQWEDRQEYVSFSSQ+MQ+YLHMHP+MYKRCELVKEGFDKASAFPLDDSPAVTIQIKGRVHCGTAFTGDEVLVEILQN
93696	Query_535	37-contig_2528_1	954	gi|118100773|ref|XP_001234099.1|PREDICTED: TEL2-interacting protein 1 homolog [Gallus gallus]	XP_001234099	1094	1	1624.76	4206	0	1	921	1	923	0	0	836	879	2	923	MAVFDTPQEAFGALRPVCVQLTQAQTVENVAQLEARLAAVGAGALQELQEYVLFPLRFALKVPGPRRERVVQRVLRCVAAVLLSTRVRSPRLLRELLSELCACLPPSPSPAPS-EELQLAAVRALQALMHSAQWDAAVALYQPSCLPLLGFAVSLLLGLAERERAKQIKVAALECLQVLVLRCECQEHPCLREEEEQRCGDLFASFLPGVSMALARIIAGDVKQGHRTTVVAVRLFYQIVGFVMADEQLARVPKQ	MAVFDTPQEAFGALRPACVQLTKAQTVENVAQLEARLAAVGAGALQELQEYVLFPLRFALKVPGPRRERVVQRVLQCLSAVLLGTRVRSPRLLRELLSELCSCLPAPHGAPAPAEELQLAAVRALLALMHSAQGDAIVALYQPSCLPLLGFAVSLLLGLAERERAKQIKLAALECLQVLLLQCECQEHRCLREEEAQRCGDLFASFLPGVSIALSRIIAGDVKQGHRTTVSAIRLFYQIVGLVMADEQLARVPKQ	MAVFDTPQEAFGALRP CVQLT+AQTVENVAQLEARLAAVGAGALQELQEYVLFPLRFALKVPGPRRERVVQRVL+C++AVLL TRVRSPRLLRELLSELC+CLP EELQLAAVRAL ALMHSAQ DA VALYQPSCLPLLGFAVSLLLGLAERERAKQIK+AALECLQVL+L+CECQEH CLREEE QRCGDLFASFLPGVS+AL+RIIAGDVKQGHRTTV A+RLFYQIVG VMADEQLARVPKQ
39295	Query_224	2-contig_42053_1	2543	gi|118100899|ref|XP_001232656.1|PREDICTED: adenylyltransferase and sulfurtransferase MOCS3 [Gallus gallus]	XP_001232656	468	1	676.011	1743	0	1692	2062	49	419	0	0	334	354	0	371	AAFPAELPPLPARAALSAADILRYSRQLVLPELGVRGQLRLARASVLVVGCGGLGCPLAQYLAAAGVGRLGLVDHDVVETSNLQRQVLHGEAGRGLPKAASAAAALRELNSSVHYVPYCRALSPRVALQLVRQYDVVADCSDNVPTRYLVNDACVLAGKPLVSGSALRMEGQLVVYNYRDGPCYRCLFPAPPPPETVTNCADGGVLGVVPGILGCIQALEVLKIVSGMGSSFNQFMLVFDALEGRFRNIKLRPKR	ADFPAKLPPLPAQAALSPADILRYSRQLVLPELGVRGQLLLARSSVLVVGCGGLGCPLAQYLAAAGVGRLGLVDHDVVETSNLHRQVLHGEARRGFPKAASAAAALRQLNSTVQYVPYCGALTPRSALQLVQQYDVVADCSDNVPTRYLVNDACVLAGKPLVSGSALRLEGQLVVYNYHGGPCYRCLFPKPPPPETVTNCADGGVLGVVPGIMGCIQALEVLKIISGMGSSFNQFMLMFDAQEGRFRNIKLRPKK	A FPA+LPPLPA+AALS ADILRYSRQLVLPELGVRGQL LAR+SVLVVGCGGLGCPLAQYLAAAGVGRLGLVDHDVVETSNL RQVLHGEA RG PKAASAAAALR+LNS+V YVPYC AL+PR ALQLV+QYDVVADCSDNVPTRYLVNDACVLAGKPLVSGSALR+EGQLVVYNY GPCYRCLFP PPPPETVTNCADGGVLGVVPGI+GCIQALEVLKI+SGMGSSFNQFML+FDA EGRFRNIKLRPK+
379029	Query_601	42-contig_11972_1	1072	gi|118100909|ref|XP_417506.2|PREDICTED: teashirt homolog 2 [Gallus gallus]	XP_417506	1036	1	2084.3	5399	0	10	1026	13	1029	0	0	1000	1008	0	1017	SGYVQEEDLKEEEDIKEEEEDDDDNSTAQLQGSNDTGTDEEHDVGPEQKGNFSYQNSPVSHISNQDAENESLLSDGSDHVTDIKSICSREPQDPKTSSHPKAQNEAHNCMDKMTAVYANILSDSYWTGLGLGFKLSNSEKRSCDNRNGGNKADFDWHQDALSKSLQQNLPSRPVSKPNLFSSVQLYRQSSKMCGTVFTGASRFRCRQCSAAYDTLVELTVHMNETGHYQDDNHKKDKHRPTSYSKPRKRAFQDMD	AGYVQEEDLKEEEDIKEEEEDDDDNSTAQLQGSNDTGTDEEHDVGPEQKGNFSYQNSPVSHISNQDAENESLLSDGSDHVTDIKSICSREPQDPKTSTHPKAQNEAHNCMDKMTAVYANILSDSYWTGLGLGFKLSNSEKRSCDNRNGGNKADFDWHQDALSKSLQQNLPSRPVSKPNLFSSVQLYRQSSKMCGTVFTGASRFRCRQCSAAYDTLVELTVHMNETGHYQDDNHKKDKHRPTSYSKPRKRAFQDMD	+GYVQEEDLKEEEDIKEEEEDDDDNSTAQLQGSNDTGTDEEHDVGPEQKGNFSYQNSPVSHISNQDAENESLLSDGSDHVTDIKSICSREPQDPKTS+HPKAQNEAHNCMDKMTAVYANILSDSYWTGLGLGFKLSNSEKRSCDNRNGGNKADFDWHQDALSKSLQQNLPSRPVSKPNLFSSVQLYRQSSKMCGTVFTGASRFRCRQCSAAYDTLVELTVHMNETGHYQDDNHKKDKHRPTSYSKPRKRAFQDMD
175618	Query_70	4-contig_29636_1	732	gi|118100956|ref|XP_417525.2|PREDICTED: ERBB receptor feedback inhibitor 1 [Gallus gallus]	XP_417525	465	1	701.049	1808	0	24	433	56	465	0	0	371	386	0	410	NHMAKQFLTFLGHSSSCASSDDRGFAEGCTEVPSQKPSPAPASPKNEQPISGYEDQLIPGFSKLSLTMGYVSEETPPHMPVKNGPIQFLSAPSHDRSCRPLPPLPVPEDLTPDEVDREVEFLTSSDTDFLLEDYGLPPFKPSGSSRRSFRGCGQINYAYFDAPTGPKPEDTNPTQSLNGCISSIYPPPQQLHRRLRRSHSGPAGSLNKPVVRLSGHLHRSSPNSDEDKPEIPPRVPIPPRALKPDYRRWSAEVAS	NPSAEQRLPSIGHSSNCVSTNDHSFAESCLQVPSQKSSPAPVSPRNEQPISRYEDQLIPGFSKLSLTAGCVSEETPPHMPIKNGPIQFLSASSNDRSSRPLPPLPVPEDITPDEVDREVEFLTSSDTDFLLEDYGLPPFKSSGSSRRSFRGCGQINYAYFDAPTGPKTEDANPTQSINGCISSIYPPPQQLHRRLRRSHSGPAGSLNKPVVRLSGHLNRSSPNSDEDKPEIPPRVPIPPRALKPDYRRWSAEVAS	N A+Q L +GHSS+C S++D FAE C +VPSQK SPAP SP+NEQPIS YEDQLIPGFSKLSLT G VSEETPPHMP+KNGPIQFLSA S+DRS RPLPPLPVPED+TPDEVDREVEFLTSSDTDFLLEDYGLPPFK SGSSRRSFRGCGQINYAYFDAPTGPK ED NPTQS+NGCISSIYPPPQQLHRRLRRSHSGPAGSLNKPVVRLSGHL+RSSPNSDEDKPEIPPRVPIPPRALKPDYRRWSAEVAS
137396	Query_158	4-contig_20897_1	552	gi|118101053|ref|XP_417591.2|PREDICTED: kelch-like protein 17 [Gallus gallus]	XP_417591	590	1	1053.89	2724	0	1	551	73	590	0	0	518	518	33	551	MSESRQTHVTLHDIDPQALEQLVQYAYTAEIVVGEGNVQTLLPAASLLQLNGVRDACCKFLLSQLDPSNCLGIRGFADTHSCSDLLKSAHKYVLQHFVEVSKTEEFMLLPLKQVLDLISSDSLNVPSEEEVYRAVLSWVKHDVDSRRQHVPRLMKCVRLPLLSRDFLMSNVDTELLVRHHSECKDLLIEALKYHLMPEQRGVLSNSRTRPRRCEGASTVLFAVGKALPAWGLLRAPAFQASRGVLRASGVMRALF	MSESRQTHVTLHDIDPQALEQLVQYAYTAEIVVGEGNVQTLLPAASLLQLNGVRDACCKFLLSQLDPSNCLGIRGFADTHSCSDLLKSAHKYVLQHFVEVSKTEEFMLLPLKQVLDLISSDSLNVPSEEEVYRAVLSWVKHDVDSRRQHVPRLMKCVRLPLLSRDFLMSNVDTELLVRHHSECKDLLIEALKYHLMPEQRGVLSNSRTRPRRCEGASTVLFAV--------------------------------	MSESRQTHVTLHDIDPQALEQLVQYAYTAEIVVGEGNVQTLLPAASLLQLNGVRDACCKFLLSQLDPSNCLGIRGFADTHSCSDLLKSAHKYVLQHFVEVSKTEEFMLLPLKQVLDLISSDSLNVPSEEEVYRAVLSWVKHDVDSRRQHVPRLMKCVRLPLLSRDFLMSNVDTELLVRHHSECKDLLIEALKYHLMPEQRGVLSNSRTRPRRCEGASTVLFAV
115182	Query_267	13-contig_3708_1	2039	gi|118101408|ref|XP_424402.2|PREDICTED: histone acetyltransferase KAT6A [Gallus gallus]	XP_424402	1981	1	3153.61	8175	0	1	1931	1	1977	0	0	1784	1823	118	2013	MVKLANPLYTEWILEAIKKVKKQKQRPSEERICNAVSSSHGLDRKTVLEQLELSVKDGTILKVSNKGLNSYKDPDNPGRIALPKPRNHGKLDGKPNVDWNKLIKRAIEGLGESSGSSLKNIERFLKGQKDVSALFGGSAASIFHQQLRLAVKRAVGHGRLLKDGPLYQLNTKATTNADGKESFESLSCLPPVCLLPHEKDKVFFKLWLPAGGGLGFSLFQLAPWKRDNYKQ---------MRDDGAHAVLVSSKS	MVKLANPLYTEWILEAIKKVKKQKQRPSEERICNAVSSSHGLDRKTVLEQLELSVKDGTILKVSNKGLNSYKDPDNPGRIALPKPRNHGKLDGKPNVDWNKLIKRAIEGLGESSGSSLKNIERFLKGQKDVSALFGGSAASIFHQQLRLAVKRAVGHGRLLKDGPLYQLNTKATTNADGKESFESLSCLPPVCLLPHEKDK-------PVAEPIPICSFCLGTKEQNREKKPEELISCADCGNSGHPSCLKFSPE	MVKLANPLYTEWILEAIKKVKKQKQRPSEERICNAVSSSHGLDRKTVLEQLELSVKDGTILKVSNKGLNSYKDPDNPGRIALPKPRNHGKLDGKPNVDWNKLIKRAIEGLGESSGSSLKNIERFLKGQKDVSALFGGSAASIFHQQLRLAVKRAVGHGRLLKDGPLYQLNTKATTNADGKESFESLSCLPPVCLLPHEKDK P + F L +++ K+ + G + L S
385786	Query_357	52-contig_5508_1	2359	gi|118101860|ref|XP_425795.2|PREDICTED: ATP-sensitive inward rectifier potassium channel 1 [Gallus gallus]	XP_425795	371	1	657.136	1694	0	1161	1488	1	333	0	0	318	321	5	333	MLSYLRKRFARHITERSRRKARLVSKDGRCNIEFGNVEQSRFVFLIDIWTTILDLRWRYKMTIFISAFLGSWFLFGLLWYVVAYIHKDLPEFNPSINHTPCVENINGLTSAFLFSLETQVTIGYGFRCVTEQCVTAIFLLIFQSILGVIINSFMCGAILAKISRSKNRAKTITFSRNAVISKRGGKLCLLIRVANLRKSLLIGSHIYGKLLKTTITPEGETIILDQVNIEFIVDAGNENLFFISPLTIYHIIDKN	MFNYLRKRFASHITERSRRKARLVSKDGRCNIEFGNVEQSRFVFLIDIWTTILDLRWRYKMTIFISAFLGSWFLFGLLWYVVAYIHKDLPEFNPSINHTPCVENINGLTSAFLFSLETQVTIGYGFRCVTEQCVTAIFLLIFQSILGVIINSFMCGAILAKISRSKNRAKTITFSRNAVISKRGGKLCLLIRVANLRKSLLIGSHIYGKLLKTTITPEGETIILDQVNIEFIVDAGNENLFFISPLTIYHIIDKN	M +YLRKRFA HITERSRRKARLVSKDGRCNIEFGNVEQSRFVFLIDIWTTILDLRWRYKMTIFISAFLGSWFLFGLLWYVVAYIHKDLPEFNPSINHTPCVENINGLTSAFLFSLETQVTIGYGFRCVTEQCVTAIFLLIFQSILGVIINSFMCGAILAKISRSKNRAKTITFSRNAVISKRGGKLCLLIRVANLRKSLLIGSHIYGKLLKTTITPEGETIILDQVNIEFIVDAGNENLFFISPLTIYHIIDKN
216364	Query_582	12-contig_12303_1	898	gi|118102055|ref|XP_424007.2|PREDICTED: RNA-binding protein MEX3A [Gallus gallus]	XP_424007	403	1	702.975	1813	0	23	367	36	380	0	0	339	341	0	345	GCKIKALRAKTNTYIKTPVRGEEPVFMVTGRREDVAMARREIISAAEHFSMIRASRNKAGTTFGSAPTLPGQVTIRVRVPYRVVGLVVGPKGATIKRIQQQTNTYIITPSRDRDPVFEITGAPGNVERAREEIETHIAVRTGKILEYNNENDFLSSSPDSSMENRYSEAWRVHTPAPGCKPLSTFRQNSLGCIGDCSVDPVYETPRLSDQNDFSYGYLFPNYGVNKQDLYYGVPESGAPMWAGQENTNPVSVLFS	GCKIKALRAKTNTYIKTPVRGEEPVFMVTGRREDVAMARREIISAAEHFSMIRASRNKAGTTFGSAPTLPGQVTIRVRVPYRVVGLVVGPKGATIKRIQQQTNTYIITPSRDRDPVFEITGAPGNVERAREEIETHIAVRTGKILEYNNENDFLSSSPDSSMENRYSEAWRVHTPAPGCKPLSTFRQNSLGCIGDCSVDPVYETPRLNDQNDFNYGYLFPNYGVNKQDLYYGVPESGAPMWAGQENTNPVSVLFS	GCKIKALRAKTNTYIKTPVRGEEPVFMVTGRREDVAMARREIISAAEHFSMIRASRNKAGTTFGSAPTLPGQVTIRVRVPYRVVGLVVGPKGATIKRIQQQTNTYIITPSRDRDPVFEITGAPGNVERAREEIETHIAVRTGKILEYNNENDFLSSSPDSSMENRYSEAWRVHTPAPGCKPLSTFRQNSLGCIGDCSVDPVYETPRL+DQNDF+YGYLFPNYGVNKQDLYYGVPESGAPMWAGQENTNPVSVLFS
199556	Query_453	5-contig_14023_1	576	gi|118102392|ref|XP_417962.2|PREDICTED: NUAK family, SNF1-like kinase, 2 [Gallus gallus]	XP_417962	615	1	1018.84	2633	0	5	575	68	615	0	0	519	531	23	571	VAIKSIRKDRIKDEQDLIHIRREIEIMSSLNHPHIIAVHEVFENSSKIVIVMEYASKGDLYDYISERQRLSEQEARHFFRQVVSAVYYCHKNGIVHRDLKLENILLDANGNIKIADFGLSNVYQQDKFLQTYCGSPLYASPEIINGRPYKGPEVDSWSLGVLLYILVHGTMPFDGHDYKTLVKQITSGDYQEPTKLSDACGLIRWMLMVNPERRATIEDIATHWWVNWGYRVPIGEQELLRESSESPLATVAEWL	VAIKSIRKDRIKDEQDLIHIRREIEIMSSLNHPHIIAVHEVFENSSKIVIVMEYASKGDLYDYISERQRLSEQEARHFFRQVVSAVYYCHKNGIVHRDLKLENILLDANGNIKIADFGLSNVYQQDKFLQTYCGSPLYASPEIINGRPYKGPEVDSWSLGVLLYILVHGTMPFDGHDYKTLVKQITSGDYREPTKLSDACGLIRWMLMVNPERRATIEDIATHWWVNWGYRVPVGEQELLRESSESPLATVAEWL	VAIKSIRKDRIKDEQDLIHIRREIEIMSSLNHPHIIAVHEVFENSSKIVIVMEYASKGDLYDYISERQRLSEQEARHFFRQVVSAVYYCHKNGIVHRDLKLENILLDANGNIKIADFGLSNVYQQDKFLQTYCGSPLYASPEIINGRPYKGPEVDSWSLGVLLYILVHGTMPFDGHDYKTLVKQITSGDY+EPTKLSDACGLIRWMLMVNPERRATIEDIATHWWVNWGYRVP+GEQELLRESSESPLATVAEWL
17114	Query_279	18-contig_14757_1	835	gi|118102445|ref|XP_417985.2|PREDICTED: plexin-A2 [Gallus gallus]	XP_417985	1893	1	918.687	2373	0	183	738	1292	1772	0	0	469	471	95	566	FAELQTDINELTSDLDRSGIPYLDYRTYAMRVLFPGIEDHPVLRELEGQGGGEVPQCMGWDCSITSGQCCGSHRLGLKPKGPVHVLFSPPDGCSLSQVQGNGQQSVEKALKLFAQLINNKVFLLTFIRTLELQRSFSMRDRGNVASLIMTGLQGRLEYATDVLKQLLSDLIEKNLENKNHPKLLLRRTESVAEKMLTNWFAFLLHKFLKECAGEPLFMLYCAIKQQMEKGPIDAITGEARYSLSEDKLIRQQIEY	FAELQTDINELTSDLDRSGIPYLDYRTYAMRVLFPGIEDHPVLRELE--------------------------------------------------VQGNGQQSVEKALKLFAQLINNKVFLLTFIRTLELQRSFSMRDRGNVASLIMTGLQGRLEYATDVLKQLLSDLIEKNLENKNHPKLLLRRTESVAEKMLTNWFAFLLHKFLKECAGEPLFMLYCAIKQQMEKGPIDAITGEARYSLSEDKLIRQQIEY	FAELQTDINELTSDLDRSGIPYLDYRTYAMRVLFPGIEDHPVLRELE VQGNGQQSVEKALKLFAQLINNKVFLLTFIRTLELQRSFSMRDRGNVASLIMTGLQGRLEYATDVLKQLLSDLIEKNLENKNHPKLLLRRTESVAEKMLTNWFAFLLHKFLKECAGEPLFMLYCAIKQQMEKGPIDAITGEARYSLSEDKLIRQQIEY
228424	Query_1100	17-contig_14757_1	757	gi|118102445|ref|XP_417985.2|PREDICTED: plexin-A2 [Gallus gallus]	XP_417985	1893	1	1140.95	2950	0	3	713	579	1213	0	0	575	590	86	716	LSLLVSDAPDLAAGVTCLFGNLTEVEGQVVGSRVVCVSPAARDVPAIPVDQDWFGVVLQLKSQETGRTFVSTEFKFYNCSAHQLCLSCVNSAFRCHWCKYRNLCTHDPTTCSFQEGRINVSEDVEILQEEGTDSPRCGSSQIAGYSPMPLDCPQLFPTEEILIPVGEVKPITLKARNLPQPQSGQRGYECVLSIQGVIHRVPALRFNSSSVQCQNSSYLYDGMDISDLAVDFAVVWNGNFVIDNPEDVKVHLYKC	LNLLVSDAPDLAAGVTCLFGNLTEVEGQVVGSRVVCVSPAARDVPAIPVDQDWFGVVLQLKSQETGRTFVSTEFKFYNCSAHQLCLSCVNSAFRCHWCKYRNLCTHDPTTCSFQEGRINVSED----------------------------CPQLFPTEEILIPVGEVKPITLKARNLPQPQSGQRGYECVLSIQGVIHRVPALRFNSSSVQCQNSSYLYDGMDISNLAVDFAVVWNGNFIIDNPEDVKVHLYKC	L+LLVSDAPDLAAGVTCLFGNLTEVEGQVVGSRVVCVSPAARDVPAIPVDQDWFGVVLQLKSQETGRTFVSTEFKFYNCSAHQLCLSCVNSAFRCHWCKYRNLCTHDPTTCSFQEGRINVSED CPQLFPTEEILIPVGEVKPITLKARNLPQPQSGQRGYECVLSIQGVIHRVPALRFNSSSVQCQNSSYLYDGMDIS+LAVDFAVVWNGNF+IDNPEDVKVHLYKC
268427	Query_1101	2-contig_4689_1	656	gi|118102503|ref|XP_418007.2|PREDICTED: homeodomain-interacting protein kinase 1 [Gallus gallus]	XP_418007	1210	1	688.337	1775	0	83	418	1	336	0	0	332	335	0	336	MASQLQVFSPPSVSSSAFCSAKKLKVEPSVWDVSGQSSSDKYYTHSKNLPAAQGQASSSHQVANFSVPAYDQNLLLPAPSVEHIVVTAADSTGSSATASFQSSQTLTHRTNLSLLEPYQKCGLKRKSEEVDSNGSVQIIEEHPPLMLQNRPAVGAAATTTTVTTKSSSSSGEGDYQLVQHEILCSMTNSYEVLEFLGRGTFGQVAKCWKRSTKEIVAIKILKNHPSYARQGQIEVSILSRLSSENADEYNFVRSY	MASQLQVFSPPSVSSSAFCSAKKLKVEPSVWDVSGQSSSDKYYTHSKNLPAAQGQASSSHQVANFSVPAYDQNLLLPAPSVEHIVVTAADSTGSSATASFQNSQTLTHRTNLSLLEPYQKCGLKRKSEEVDSNGSVQIIEEHPPLMLQNRPAVGAAATTTTVTTKSSNSSGEGDYQLVQHEILCSMTNSYEVLEFLGRGTFGQVAKCWKRSTKEIVAIKILKNHPSYARQGQIEVSILSRLSSENADEYNFVRSY	MASQLQVFSPPSVSSSAFCSAKKLKVEPSVWDVSGQSSSDKYYTHSKNLPAAQGQASSSHQVANFSVPAYDQNLLLPAPSVEHIVVTAADSTGSSATASFQ+SQTLTHRTNLSLLEPYQKCGLKRKSEEVDSNGSVQIIEEHPPLMLQNRPAVGAAATTTTVTTKSS+SSGEGDYQLVQHEILCSMTNSYEVLEFLGRGTFGQVAKCWKRSTKEIVAIKILKNHPSYARQGQIEVSILSRLSSENADEYNFVRSY
224751	Query_724	17-contig_12359_1	1207	gi|118102540|ref|XP_418032.2|PREDICTED: LEM domain-containing protein 2 [Gallus gallus]	XP_418032	715	1	659.448	1700	0	706	1200	1	499	0	0	390	419	12	503	MAELTDAELRKELLALGYRPGPITETTRKVYIKKLSCLRAELAAAKRTGRGAPPSPGRRSGRPRQASPSRQHLGFSPGSVRAARDREEEEEEEEEMEDDEEEER---GRPPASRWEPAEGGRPSWGDPRGSPPGRSAGLGGRAELGLSRDGLRGLSTPSSWSSSLERSGGLRAGTGPSLDDGYRGSSSFQWSASAEGSEGLSGGLRPSLDVFREPSVSQWSTSVERGEGLSARAGLGTSMDGVGGLSSMSSWGSS	MAELTDAELRKELLALGYRPGPITETTRKVYIKKLSCLRAEVAAAKRRGRGAPPSPGRSSGRPQQASPSRPRLGFSLSPGRAARDREEEDEDEMEEDEMEEDEEEERGRAPVSRWEAAEGGRLSWGDPRGSPPGRSGGLGGRNEGGMSRDGLRGLSTPSSWSSSLERSGGLRAETGPSRDDGFWYSSSFEWNTSTEGSEGRSSGLRPSLDGSGGPSVSHWKTSIDRGEGLSARAGIGTSMDGVGGLSSMSSWGTS	MAELTDAELRKELLALGYRPGPITETTRKVYIKKLSCLRAE+AAAKR GRGAPPSPGR SGRP+QASPSR LGFS RAARDREEE+E+E E ++ EE+E GR P SRWE AEGGR SWGDPRGSPPGRS GLGGR E G+SRDGLRGLSTPSSWSSSLERSGGLRA TGPS DDG+ SSSF+W+ S EGSEG S GLRPSLD PSVS W TS++RGEGLSARAG+GTSMDGVGGLSSMSSWG+S
391048	Query_394	4-contig_12044_1	2082	gi|118103023|ref|XP_425868.2|PREDICTED: membrane primary amine oxidase [Gallus gallus]	XP_425868	755	1	976.852	2524	0	409	976	1	522	0	0	487	501	46	568	MNMKTALVLLLLALATIFALVCVLLTRARAPGACQHQPPAQEEADDGRSRVFADLTPEELAQVVQYLRGSLGVPLADAAHAKPSDNCIASVDVQLPAKAEVLRFLDAGGARPPREALAVLYFGAQAEPNVTEYVVGPLPAPAYHRDVTVQKYGGKVPYHRRXXXXXXXXXXXXXXXXXXXXXXXXXXXXXXXXXXXXXXGKVPYHRRPALPAEYKQVAEFLKKQVFPAAPSFMHQVMEYDGANLAAVTAAPRGSQ	MNMKTVLVLLLLALATIFALVCVLLTRARAPGACQQQPSAQEEADDGHSRVFADLTPEELAQVVQYLRGSLGVPLADAARAKPSDNCIASVDVQLPAKAEVLRFLDAGGARPPREALAVLYFGAQAEPNVTEYVVGPLPAPTYHRDVTVQKYGG----------------------------------------------KVPYHRRPALPAEYKQIADFFRGRVFPSAPSFMDQVMEYDGANLAAVTTAPRGSR	MNMKT LVLLLLALATIFALVCVLLTRARAPGACQ QP AQEEADDG SRVFADLTPEELAQVVQYLRGSLGVPLADAA AKPSDNCIASVDVQLPAKAEVLRFLDAGGARPPREALAVLYFGAQAEPNVTEYVVGPLPAP YHRDVTVQKYGG KVPYHRRPALPAEYKQ+A+F + +VFP+APSFM QVMEYDGANLAAVT APRGS+
151384	Query_620	1-contig_23414_1	710	gi|118103065|ref|XP_418174.2|PREDICTED: mitochondrial import inner membrane translocase subunit TIM44 [Gallus gallus]	XP_418174	451	1	729.554	1882	0	346	710	11	375	0	0	355	359	0	365	KCLISGVWLMPRRYLAPAVHSGAVYRTSGPVSEINQSRCYSSGGRKGFISGFVENIKQELAKNKEMKESIKKFRDEAKKLEESDALREARRKYKTIESETVKTSEVIKKKLEEITGTVKESLDEVSKSDIGRKIKEGVEEAAKTAKQSAESVTKGGEKLGKTAAFKVISQGVETVKKEIDESVLGQTGPYKRPERLRKRTEFSGEKIKEERIFEANEEAMGMVLHKDSRWYQQWKDFKDNNVVFNRFFEMKMKYD	KCLISGMWLMPRRYPVPAVHGGAVYRASRPVSEINQSRCYSSGGRKGFISGFVENIKQELAKNKEMKESIKKFRDEAKKLEESDALREARRKYKTIESETVKTSEVIKKKLEEITGTVKESLDEVSKSDIGRKIKEGVEEAAKTAKQSAESVTKGGEKLGKTAAFKAISQGVETVKKEIDESVLGQTGPYKRPERLRKRTEFSGERIKEERIFEANEEAMGMVLHKDSRWYQQWKDFKDNNVVFNRFFEMKMKYD	KCLISG+WLMPRRY PAVH GAVYR S PVSEINQSRCYSSGGRKGFISGFVENIKQELAKNKEMKESIKKFRDEAKKLEESDALREARRKYKTIESETVKTSEVIKKKLEEITGTVKESLDEVSKSDIGRKIKEGVEEAAKTAKQSAESVTKGGEKLGKTAAFK ISQGVETVKKEIDESVLGQTGPYKRPERLRKRTEFSGE+IKEERIFEANEEAMGMVLHKDSRWYQQWKDFKDNNVVFNRFFEMKMKYD
79666	Query_120	2-contig_382_1	383	gi|118103182|ref|XP_418202.2|PREDICTED: RNA-binding protein MEX3D [Gallus gallus]	XP_418202	443	1	713.375	1840	0	1	382	62	443	0	0	379	380	0	382	MAKREILSAAEHFSMIRATRNKVNGLTGALQGPPNLPGQTTIQVRVPYRVVGLVVGPKGATIKRIQQQTHTYIVTPSRDKEPVFEVTGMPENVDRAREEIEAHITMRTGSFVDVNADNDFHTNGTDVCLDLQGGSGALWAKAPHPARRPAAALRNDSLSSLGSASTESFYSGRVADNSPTSPYSTGGGFTFSDAPAPLGSEECDFGFDFLALDLTTPSAAAAIWSPFERAANPLQAFGGSQRRNSGTATPRHSPT	MAKREILSAAEHFSMIRATRNKVNGLTGALQGPPNLPGQTTIQVRVPYRVVGLVVGPKGATIKRIQQQTHTYIVTPSRDKEPVFEVTGMPENVDRAREEIEAHITMRTGSFVDVNADNDFHTNGTDVCLDLQGGSAGLWAKAPHPARRPAAALRNDSLSSLGSASTESFYSGRVADNSPTSPYSTGGGFTFSDAPAPLGSEECDFGFDFLALDLTTPSAAAAIWSPFERAANPLQAFGGSQRRNSGTATPRHSPT	MAKREILSAAEHFSMIRATRNKVNGLTGALQGPPNLPGQTTIQVRVPYRVVGLVVGPKGATIKRIQQQTHTYIVTPSRDKEPVFEVTGMPENVDRAREEIEAHITMRTGSFVDVNADNDFHTNGTDVCLDLQGGS LWAKAPHPARRPAAALRNDSLSSLGSASTESFYSGRVADNSPTSPYSTGGGFTFSDAPAPLGSEECDFGFDFLALDLTTPSAAAAIWSPFERAANPLQAFGGSQRRNSGTATPRHSPT
193971	Query_402	24-contig_12345_1	896	gi|118103699|ref|XP_425003.2|PREDICTED: ankycorbin [Gallus gallus]	XP_425003	976	1	838.18	2164	0	286	758	372	846	0	0	445	458	4	476	ERAPKETDSTIDSSRSTQREFDQTADRQSEFSAQELKSTLNASQSQEKLTSPSEIKIKYLQED---GQRKLENSETKRKHLEAQVQSRVPEADYLNNSDISENGSDPHLKIQETQNKCEEAVKEALNVQRQVKLGLVSSESEETCSELSKLKVTCEEVEMLRQELKRALEESERQKEKVRELQKKFEEREQSVTSKLSAEECEEIKNSYCSVIDNINQEKALLIERYKEGQEEIKRLQDKLTNQTHLESSAESGE	ERTPKEVDSTIDSYHSTQREFDQTADRQSEISAQELKSTLNATQSQEKLTSPSEIKIKYLQEDSKDAQRKLENSETKRKHLEAQVQSRVPEAD-LNNTDISENGSDPSLKIQETQSKYEEAAKEVLNAQKQVKPGLVSSESEETCSELSKLKVTCEEVEMLRQELRRALEESERQKEKVRELQKKFEEREQNVTSKLSVEECEELKNSYCSVIDNINQEKALLIERYKEGQEEIKRLQDKLTNQTHLESSAESGE	ER PKE DSTIDS STQREFDQTADRQSE SAQELKSTLNA+QSQEKLTSPSEIKIKYLQED QRKLENSETKRKHLEAQVQSRVPEAD LNN+DISENGSDP LKIQETQ+K EEA KE LN Q+QVK GLVSSESEETCSELSKLKVTCEEVEMLRQEL+RALEESERQKEKVRELQKKFEEREQ+VTSKLS EECEE+KNSYCSVIDNINQEKALLIERYKEGQEEIKRLQDKLTNQTHLESSAESGE
237800	Query_242	4-contig_61382_1	584	gi|118103834|ref|XP_429138.2|PREDICTED: protein LAP2 [Gallus gallus]	XP_429138	1410	1	920.998	2379	0	37	531	736	1229	0	0	459	474	1	495	SITVSFRQEDENLNNLLQNGGDLNITAEEKINVQEKVTNLAEYELSIEERIGLMGKGVELSSPTEETHKLDQINMNINKLVSEETVPVPIERVKPQEVASVKGFMNNTMKDEGEHLENGNKYPINKVNGHPEESVQSPSKDELLRSTAVDGNSSTELSISRSTEDLSPQRSGPVMKSHSITSMDPGGLKVYDIVSDSGSPQPNSVVKSSSGSADGKNIVRSKSATLLYDQPLQVFPGSSSSSDLISSTKTAFKLD	AVLSKIRREDENLNNLLQNGGELNITAEEKINVQEKVTNLSEYELSIEEKIGLIGKGVDLSSPTEETHKLDQINMNINKLVSEEAVPVPTERVKPQEVVSVKGFMNN-MKEEGEHLENGNKYPINKVNGHPEESVHSPSKDELLRSTTADGGSSTELSISRSTEDLSPQRGGTVMKSHSITSMDPGGLKVYDIVSDSGSPQPNSVIKSSSGGADGKNIVRSKSATLLYDQPLQVFPGSSSSSDLISSTKTPFKLD	++ R+EDENLNNLLQNGG+LNITAEEKINVQEKVTNL+EYELSIEE+IGL+GKGV+LSSPTEETHKLDQINMNINKLVSEE VPVP ERVKPQEV SVKGFMNN MK+EGEHLENGNKYPINKVNGHPEESV SPSKDELLRST DG SSTELSISRSTEDLSPQR G VMKSHSITSMDPGGLKVYDIVSDSGSPQPNSV+KSSSG ADGKNIVRSKSATLLYDQPLQVFPGSSSSSDLISSTKT FKLD
289965	Query_162	3-contig_2698_1	930	gi|118103969|ref|XP_429194.2|PREDICTED: potassium voltage-gated channel subfamily V member 2 [Gallus gallus]	XP_429194	542	1	844.343	2180	0	321	773	1	453	0	0	438	443	0	453	MGKDNDGVFLNKQSGFSGTAPLSSQPLLLLGPEGNYNYYVDDEDEEEEEKDQGKWPIGDPSERENKLSSSIPFSPAFSSGGLARPSTSSVLNINVGGQSYRLTYQAVAVYPKTRLGRLATSTDRRCQLGLCDDYAAQVDEYFFDRDPAVFQLVYNFYSSGVLRVRDELCPRSFLEELSYWGVRLKYTPRCCRICFEERRDELSEQLKVQRELRSQAEAQENEQLFHHMRYYGPQRWRLWNLMEKPFSSVTAKVMA	MGKDNEGVCLNKQSDFSGTAPLSSQPLLLLGPEGNYNYYVDDEDEEEEEKDQGKWPTGDRFEGENKLSSSIPFSPAFSSGAPARPSTPSVLNINVGGQSYRLTYQAVATYPKTRLGRLATSTDRRCQLGLCDDYAAQVDEYFFDRDPAVFQLVYNFYASGVLRVRDELCPRSFLEELSYWGVRLKYTPRCCRICFEERRDELSEQLKVQRELRSQAEAQENEQLFHHMRYYGPQRWRLWNLMEKPFSSVTAKVMA	MGKDN+GV LNKQS FSGTAPLSSQPLLLLGPEGNYNYYVDDEDEEEEEKDQGKWP GD E ENKLSSSIPFSPAFSSG ARPST SVLNINVGGQSYRLTYQAVA YPKTRLGRLATSTDRRCQLGLCDDYAAQVDEYFFDRDPAVFQLVYNFY+SGVLRVRDELCPRSFLEELSYWGVRLKYTPRCCRICFEERRDELSEQLKVQRELRSQAEAQENEQLFHHMRYYGPQRWRLWNLMEKPFSSVTAKVMA
110504	Query_68	48-contig_3821_1	762	gi|118104448|ref|XP_429189.2|PREDICTED: uncharacterized protein KIAA1958 [Gallus gallus]	XP_429189	733	1	720.694	1859	0	291	629	384	722	0	0	336	339	0	339	LPDQDEKAAELSREQNEKTIRSTQTALRNFREFLISKYPSETREIYVIPCKELDAYLASFFVDARQKDGSEYEPNSLANYQCGLERYLKEHRYGYSITRDKEFKRSQEALKQKQIELRCKGKGNKPHKSMKLTFADELILRKRGLLSRYNPEGLLNLVWLNNTKAFGHCTGFHGSTLKWGDIRLRVTETGLEYLEWMGPDNGDISAKSKRGGTDSRVYATQHSPQTCPVQDYKEYAQRRPPAMRYEDAPFYLSIK	MPDQDERAAELSREQNEKTIRSTQTALRNFREFLISKYPSETREIYVIPCKELDAYLASFFVDARQKDGSEYEPNSLANYQCGLERYLKEHRYGYSITRDKEFKRSQEALKQKQIELRCKGKGNKPHKSMKLTFADELILRKRGLLSRYNPEGLLNLVWLNNTKAFGHCTGFHGSTLKWGDIRLRVTETGLEYLEWMGPDNGDINAKSKRGGTDSRVYATQHSPQTCPVQDYKEYAQRRPPAMRYEDAPFYLSIK	+PDQDE+AAELSREQNEKTIRSTQTALRNFREFLISKYPSETREIYVIPCKELDAYLASFFVDARQKDGSEYEPNSLANYQCGLERYLKEHRYGYSITRDKEFKRSQEALKQKQIELRCKGKGNKPHKSMKLTFADELILRKRGLLSRYNPEGLLNLVWLNNTKAFGHCTGFHGSTLKWGDIRLRVTETGLEYLEWMGPDNGDI+AKSKRGGTDSRVYATQHSPQTCPVQDYKEYAQRRPPAMRYEDAPFYLSIK
63138	Query_686	30-contig_10176_1	741	gi|118104649|ref|XP_428814.2|PREDICTED: zinc finger and BTB domain-containing protein 5 [Gallus gallus]	XP_428814	673	1	1221.07	3158	0	105	707	1	602	0	0	595	598	1	603	MDFPGHFEQIFQQLNYQRLHGQLCDCVIVVGNRHFKAHRSVLAACSTHFRALFTVAEGDQTMNMIQLDSEVVTAEAFAALIDMMYTSTLMLGESNVMDILLAASHLHLNSVVKACKHYLTTRTLPMSPPSDRVQEQNARIQRSFMLQQLGLSIVSSALNSTQSSEEQPSTMSSTMRSNIEQRTTFPIRRLHKRKQSSEDRARQRMRPAIDEAVSDVAPESGQSVVHSREDFFSPDSLKIVDNSKADAVTDNQEDN	MDFPGHFEQIFQQLNYQRLHGQLCDCVIVVGNRHFKAHRSVLAACSTHFRALFTVAEGDQTMNMIQLDSEVVTAEAFAALIDMMYTSTLMLGESNVMDILLAASHLHLNSVVKACKHYLTTRTLPMSPPSDRVQEQNARIQRSFMLQQLGLSIVSSALNSTQSSEEQPSTMSSTMRSNIEQRSAFPIRRLHKRKQSSEDRARQRMRPAIDEAVSDVAPESGQSV-HSREDFFSPDSLKIVDNSKADAVTDNQEDN	MDFPGHFEQIFQQLNYQRLHGQLCDCVIVVGNRHFKAHRSVLAACSTHFRALFTVAEGDQTMNMIQLDSEVVTAEAFAALIDMMYTSTLMLGESNVMDILLAASHLHLNSVVKACKHYLTTRTLPMSPPSDRVQEQNARIQRSFMLQQLGLSIVSSALNSTQSSEEQPSTMSSTMRSNIEQR+ FPIRRLHKRKQSSEDRARQRMRPAIDEAVSDVAPESGQSV HSREDFFSPDSLKIVDNSKADAVTDNQEDN
274478	Query_86	7-contig_139_1	470	gi|118129676|ref|XP_428853.2|PREDICTED: keratin, type II cytoskeletal 80-like [Gallus gallus]	XP_428853	464	1	850.121	2195	0	1	469	1	464	0	0	434	446	15	474	MSQGRAASASPERLGSCSPSSVSSPSCGALHGDGGYQSSSYISIDGRLLPPVHLDIDTDFQAVREQEKEDIKLLNNQFVTLIEKVQCLEQQNKILTTRWNFLKDQDNSHSESDMKAIYDQYMSKMNQEMQALNYEQENLESELTEVLSTMDNFRSNTAKTSRSSEYEDEIRLCSGMEYTFMELKKDLDASTLHRTELEVKLSGLQELMDLKKTIYEQELEELLTEIKDISVVLGIDNTCKLDLSRIVEEVRAQYE	MSQGRAGSTSPDSLGHCSPSSVTSPSCGAPYGDGGYQSSSYLSIDGRLLAPVHLDIDTDFHAVREQEKEDIKLLNNQFVTLIEKVQCLEQQNKILTTRWNFLKDQDNSHSESDVKAIYDQYMSKMNQEMQALNYEQENLESELTEVLSTMDNFRS---------KYEDEIRLCSGMEYTFMELKKDLDASTLHRTELEVKLSGLQELMDLKKTIYEQELEELLTEIKDISVVLGIDNTCKLDLSRIVEEVRAQYE	MSQGRA S SP+ LG CSPSSV+SPSCGA +GDGGYQSSSY+SIDGRLL PVHLDIDTDF AVREQEKEDIKLLNNQFVTLIEKVQCLEQQNKILTTRWNFLKDQDNSHSESD+KAIYDQYMSKMNQEMQALNYEQENLESELTEVLSTMDNFRS +YEDEIRLCSGMEYTFMELKKDLDASTLHRTELEVKLSGLQELMDLKKTIYEQELEELLTEIKDISVVLGIDNTCKLDLSRIVEEVRAQYE
123479	Query_793	13-contig_36982_1	459	gi|1184958|gb|AAA87587.1|elongation factor 2 [Gallus gallus]	AAA87587	858	1	952.97	2462	0	1	458	401	858	0	0	456	456	0	458	MVPTSDKGRFYAFGRVFSGLVSTGLKVRIMGPNYTPGKKEDLYLKPIQRTILMMGRYVEPIEDVPCGNIVGLVGVDQFLVKTGTITTFEHAHNMRVMKFSVSPVVRVAVEAKNPADLPKLVEGLKRLAKSDPMVQCIIEESGEHIIAGAGELHLEICLKDLEEDHACIPIKKSDPVVSYRETVSEESNVMCLSKSPNKHNRLYMKARPFPDGLAEDIDKGEVSARQELKQRARYLAEKYEWDVTEARKIWCFGPD	MVPTSDKGRFYAFGRVFSGLVSTGLKVRIMGPNYTPGKKEDLYLKPIQRTILMMGRYVEPIEDVPCGNIVGLVGVDQFLVKTGTITTFEHAHNMRVMKFSVSPVVRVAVEAKNPADLPKLVEGLKRLAKSDPMVQCIIEESGEHIIAGAGELHLEICLKDLEEDHACIPIKKSDPVVSYRETVSEESNVMCLSKSPNKHNRLYMKARPFPDGLAEDIDKGEVSARQELKQRARYLAEKYEWDVTEARKIWCFGPD	MVPTSDKGRFYAFGRVFSGLVSTGLKVRIMGPNYTPGKKEDLYLKPIQRTILMMGRYVEPIEDVPCGNIVGLVGVDQFLVKTGTITTFEHAHNMRVMKFSVSPVVRVAVEAKNPADLPKLVEGLKRLAKSDPMVQCIIEESGEHIIAGAGELHLEICLKDLEEDHACIPIKKSDPVVSYRETVSEESNVMCLSKSPNKHNRLYMKARPFPDGLAEDIDKGEVSARQELKQRARYLAEKYEWDVTEARKIWCFGPD
93766	Query_388	5-contig_22209_1	617	gi|124257919|gb|ABM92942.1|prostaglandin E2 receptor subtype 4 [Gallus gallus]	ABM92942	475	1	862.062	2226	0	1	524	1	473	0	0	455	463	53	525	MSFN-LTIVSPANGSANGTASAAEGGKPATIPTVMFIFGVVGNLIAIVVLCKSRKEQKETTFYTLVCGLAVTDLLGTCLVSPVTIATYLQNRWPGGPALCEYSSFILLFFGLSGLSIICAMSIERYLAINHAYFYNHYVDKKLAGLTLFAIYASNVLFCALPSMGLGKSTLQYPDTWCFIDWRAKKATHAAYSYMYAGFSSFLIMVTVICNILVCVALIRMHRQFMRRTSLGTDTTSSRLSDFRRRRSFRRMAGA	MSFNSTTILQPANGSANGTASAAEGGKPATIPTVMFIFGVVGNLIAIVVLCKSRKEQKETTFYTLVCGLAVTDLLGTCLVSPVTIATYLQNRWPGGPALCEYSSFILLFFGLSGLSIICAMSIERYLAINHAYFYNHYVDKKLAGLTLFAIYASNVLFCALPSMGLSKSTLQYPDTWCFIDWRAEKATHAAYSYMYAGFSSFLIMVTVICNILVCVALIRMHRQFMRRTSLGTDTTSSRLSDFRRRRSFRRMAGA	MSFN TI+ PANGSANGTASAAEGGKPATIPTVMFIFGVVGNLIAIVVLCKSRKEQKETTFYTLVCGLAVTDLLGTCLVSPVTIATYLQNRWPGGPALCEYSSFILLFFGLSGLSIICAMSIERYLAINHAYFYNHYVDKKLAGLTLFAIYASNVLFCALPSMGL KSTLQYPDTWCFIDWRA+KATHAAYSYMYAGFSSFLIMVTVICNILVCVALIRMHRQFMRRTSLGTDTTSSRLSDFRRRRSFRRMAGA
219116	Query_883	6-contig_3671_1	650	gi|126651|sp|P24802.1|PLOD1_CHICKRecName: Full=Procollagen-lysine,2-oxoglutarate 5-dioxygenase 1; AltName: Full=Lysyl hydroxylase 1; Short=LH1; Flags: Precursor	P24802	730	1	1231.85	3186	0	10	649	26	730	0	0	603	619	65	705	RAENLLVLTVATKQTEGFRRFKRSAQFFNYKVQVLGLDEEWKGGDDKRPAGGGQKVRLLKSALKQYADKEDLIILFTDSYDVLFASGPTELLKKFKQAKSKVVFSAENYIYPDRKLETKYPQVRDGKRFLGSGGFIGYAPNLKKLVEGWKGQDDDSDQLFYTNIFLDPEKR-----------------------VVLKFENARVRARNLLYDTLPVIIHGNGPTKLQLNYLGNYIPQIWTFETGCTVCDEGLRSL	QEENLLVLTVATKQTEGFRRFRRSAQFFNYKIQVLGLDEEWKGGDDKKPAGGGQKVRLLKSALKQHADKEDLVILFIESYDVLFASGPTELLKKFKQAKSKVVFSAENYIYPDRKLEAKYPPVRDGKRFLGSGGFIGYAPNLKKLVEEWKGKDDDSDQLFYTKIFLDPEKRENINISLDHRSRIFQNLNGALDEVVLKFENARVRARNLLYDTLPVIIHGNGPTKLQLNYLGNYIPQIWTFETGCTVCDEGLRSL	+ ENLLVLTVATKQTEGFRRF+RSAQFFNYK+QVLGLDEEWKGGDDK+PAGGGQKVRLLKSALKQ+ADKEDL+ILF +SYDVLFASGPTELLKKFKQAKSKVVFSAENYIYPDRKLE KYP VRDGKRFLGSGGFIGYAPNLKKLVE WKG+DDDSDQLFYT IFLDPEKR VVLKFENARVRARNLLYDTLPVIIHGNGPTKLQLNYLGNYIPQIWTFETGCTVCDEGLRSL
140292	Query_796	30-contig_16314_1	650	gi|13940252|emb|CAC37792.1|butyrylcholinesterase [Gallus gallus]	CAC37792	603	1	828.55	2139	0	188	626	1	439	0	0	402	420	0	439	MTGANGASICARFLMWLLLLCMFIRKVVPEDNIITTKKGRVRGTNLQVLGGTVTAFLGIPYGKPPVGRLRFRKPEPFEKWSGIWNATAHANSCYQLIDTTYPGFPGIEMWNPKTNLSEDCLYLNVWIPSPKPKNATVMVWIYGGGFETGSTSLPVYDGKFLARVERVIVVSMNYRTGALGFLALPGNKEVPGNAGLFDQRLALQWIQENIASFGGNPKSVTIFGESAGSASVSYHVLSPKSHPLFTRAIMQSGSA	MVWANGMSICARFLMWLLLLFMFIRKVVPEDNVITTEKGRVRGTNLQVLGGTVTAFLGIPYGKPPIGRLRFQKPEPFEKWSGIWKATKHANSCYQLIDTTYPGFPGTEMWNPKTNLSEDCLYLNVWIPSPKPKNATVMVWIYGGSFETGSTSLPVYDGKFLARVERVIVVSMNYRTGALGFLALPGNKEVPGNAGLFDQRLALQWVQENIASFGGNPKSVTIFGESAGSASVSYHILSPKSHPLFTRAIMQSGSA	M ANG SICARFLMWLLLL MFIRKVVPEDN+ITT+KGRVRGTNLQVLGGTVTAFLGIPYGKPP+GRLRF+KPEPFEKWSGIW AT HANSCYQLIDTTYPGFPG EMWNPKTNLSEDCLYLNVWIPSPKPKNATVMVWIYGG FETGSTSLPVYDGKFLARVERVIVVSMNYRTGALGFLALPGNKEVPGNAGLFDQRLALQW+QENIASFGGNPKSVTIFGESAGSASVSYH+LSPKSHPLFTRAIMQSGSA
15190	Query_561	4-contig_18105_1	482	gi|14043015|gb|AAK29666.2|AF349908_1death receptor 6 [Gallus gallus]	AAK29666	651	1	677.552	1747	0	47	457	9	421	0	0	363	382	12	418	VLPWRSLLVFLGTAHAQPKLPSEQNAVSLPAGKYRHLERATNQELICDKCPAGTYVSKHCTKSTLRECSPCPDGSFTKHENGIERCHACRKPCELPMIEKTHCTALTDRECTCLSGTFQTNDTCVPYTVCPVGWGVRKKGTETEDVRCKPCPRGTFSDVPSSVMKCKTYTDCFGKNMVVVKPGTKESDNVCGSPASLPSTSLTSG---ADGQSPGAPPTAYLPRGLNSSAVDLPSSPVPRVSNGTAEPAAEYNET	VLP---LLVFLGTADAQPKLTSEQNAVSLPAGKYLHLDRATNQELICDKCPAGTYVSKHCTKSTLRECSPCPDGTFTKHENGIERCHPCRKPCELPMIEKTHCTALTDRECTCLSGTFQINDTCVPYTVCPVGWGVRKKGTETEDVRCKPCLRGTFSDVPSSVMKCKTYTDCFGKNMVVVKPGTKESDNVCGSPASLPNTSLTSSDAQADGETYEAPPTAYLPKGLNSSVFDLSSSPAPRVSNGTAEPTVDYNDT	VLP LLVFLGTA AQPKL SEQNAVSLPAGKY HL+RATNQELICDKCPAGTYVSKHCTKSTLRECSPCPDG+FTKHENGIERCH CRKPCELPMIEKTHCTALTDRECTCLSGTFQ NDTCVPYTVCPVGWGVRKKGTETEDVRCKPC RGTFSDVPSSVMKCKTYTDCFGKNMVVVKPGTKESDNVCGSPASLP+TSLTS ADG++ APPTAYLP+GLNSS DL SSP PRVSNGTAEP +YN+T
179869	Query_391	5-contig_3721_1	929	gi|14579553|gb|AAK69306.1|AF380358_1AG9C5 [Gallus gallus]	AAK69306	556	1	749.584	1934	0	1	521	1	523	0	0	414	441	28	536	MSSKPQIRPAENGEHCRSKMENGMDSVGPPTLSTYTPEEMVQQMKELITENNELKEAMKLHNQAMKDRYEELSIWREKQKEEREFYETKFKEAKQCLLAKCVENEQLQQQLQSLKEREEGAEMEGCAAPEKEARQLKSKVQRLQAEKADLLAIISELQLKLNIASAEDSFVEIGMN----LFAQLDKKELFEHCRKGGLHLHAQGL---------RLAGCGKVMLLGNELFAQNVDFFQNCVKFSKKR--GMENE	MSSKPQIRPAENGEHCRSKMENGMDSMAPPTLSTYTPEEMVQQMKELITENNELKEAMKLHNQAMKDRYEELSIWREKQKEEREFYETKFKEAKQCLLAKCVENEQLQQQLQSLKEREEGAEMEGCATPEKEARQLKSKVQRLQAEKADLLAIISELQVKLNIASAEDSFVEIGMNEEVNRTARENQDNSSEMASNIAVYIRSKSADESKNLESEELTVSQLLCCLRNE--TQRREKLEKELQDHKERLSKMENE	MSSKPQIRPAENGEHCRSKMENGMDS+ PPTLSTYTPEEMVQQMKELITENNELKEAMKLHNQAMKDRYEELSIWREKQKEEREFYETKFKEAKQCLLAKCVENEQLQQQLQSLKEREEGAEMEGCA PEKEARQLKSKVQRLQAEKADLLAIISELQ+KLNIASAEDSFVEIGMN A+ ++ E +++ ++ L + L NE Q + + ++ K+R MENE
185942	Query_637	1-contig_82415_1	546	gi|14861378|gb|AAK73654.1|lysosomal alpha-N-acetyl glucosaminidase [Dromaius novaehollandiae]	AAK73654	753	1	912.909	2358	0	4	544	213	752	0	0	444	487	1	541	GTLPCFPGPVRGAGLLSPLSLPQYRIVERMRSLGMTTVLPAFAGHVPQGVLRVFPRINATRLGSWSHFDCTLSCAYLLSPEEPMFQVIGTLFLKELIREFGTDHIYSADTFNEMSPLSSDPAYLAGISSAVFRAMTGADPEAQWLMQGWLFQHQPTFWRPPQVRAVLRAVPLGRMIVLDLFAESKPVYEWTESFYGQPFIWCMLHNFGGNHGLFGAVEAINRGPFEARRFPNSTMVGTGLAPEGIEQNDVVYELM	GNLHGWAGPLPRAWHLKQLYV-QYRVLERMRSLGMITVLPAFAGHVPQGVLRAFPRVNATRLGGWSHFDCTYSCTYLLDPEDPMFQVIGTLFLKELIKEFGTDHIYSADTFNEMNPLSSDPAYLSRVSSAVFRSMTGADPKAVWLMQGWLFQHQPDFWQPAQVRALLHGVPLGRMIVLDLFAESRPVYQWTESFYGQPFIWCMLHNFGGNHGLFGTVEAINHGPFAARRFPNSTMVGTGLVPEGIEQNDMVYELM	G L + GP+ A L L + QYR++ERMRSLGM TVLPAFAGHVPQGVLR FPR+NATRLG WSHFDCT SC YLL PE+PMFQVIGTLFLKELI+EFGTDHIYSADTFNEM+PLSSDPAYL+ +SSAVFR+MTGADP+A WLMQGWLFQHQP FW+P QVRA+L VPLGRMIVLDLFAES+PVY+WTESFYGQPFIWCMLHNFGGNHGLFG VEAIN GPF ARRFPNSTMVGTGL PEGIEQND+VYELM
73315	Query_421	9-contig_490_1	1464	gi|15081211|gb|AAK83825.1|AF355273_1breast and ovarian cancer susceptibility-like protein [Gallus gallus]	AAK83825	1749	1	1801.56	4665	0	101	1416	202	1595	0	0	999	1109	84	1397	LEHKE-LEEPKSPENENSY-NTQPLKLGAEEIILPDVV------------------------------------------DVLTEQCDGIGNANPLKNDDTSFSKNAEEMDVEETLCSSKKQWLDLGDSSEGRLDKIKKKDICVPSVEDVEMYEPVNDSLPEKEHPLENLLQPNIPHCPTLCEVSRKRLNESIQKVNEWFLKSNEIKSSSSSQNDSAEAINASGEGDISLSD--SSISEKTNPVVDSVEVAVVEE	LEDKEELEEPKSAEKYGSSCNTQPLKLGAKEIILPNVIGETDFLKEALDKKSMLNITEHIKCNQVNTIEGQSSPLNVFDADLLTGQRDGIGNASPLKND-TSFLKNAEEMDVEETQCSHKNQELDLEDSSEGRLDKIKEKDICVPSVEDVEMCEPMDDSLLEKEPPVEKPLQPKIPHCPTLNEVSTKGLNQSIQKVNEWFSKSSRILSSSSSQNDHAEATDASGEGDISLSDKDSCISEKTNPIVDSVEFAVIER	LE KE LEEPKS E S NTQPLKLGA+EIILP+V+ D+LT Q DGIGNA+PLKND TSF KNAEEMDVEET CS K Q LDL DSSEGRLDKIK+KDICVPSVEDVEM EP++DSL EKE P+E LQP IPHCPTL EVS K LN+SIQKVNEWF KS+ I SSSSSQND AEA +ASGEGDISLSD S ISEKTNP+VDSVE AV+E
349143	Query_954	25-contig_2988_1	3158	gi|15778121|dbj|BAB68506.1|DNA ligase IV [Gallus gallus]	BAB68506	912	1	1804.65	4673	0	862	1755	1	894	0	0	861	885	0	894	MASAPASQPSPKTTVASHVPFADLCSTLERIQTCKSRPEKTKFFKDFLDSWRNFHNALHQKEKDVTDSFYPAMRLILPQLERERMAYGIKETMLAKLYIELLNLPKDGKDAVKLLNYRTPTGSRGDAGDFAMIAYFVLKPRSPKRGRLTVEQVNELLDAIANNNAAKNKGLVKKSLLQLITQSTALEQKWLIRMIIKDLKLGVSQQTIFSIFHPDAAELHSVTTDLEKVCRQLHDPSVSLSDVSIMLFSAFKPML	MASAPVLQPSPKRTVASHVPFADLCSTLERIQTCKSRPEKTKYFKDFLDSWRKFHSALHQKEKDVTDSFYPAMRLILPQLERERMAYGIKETMLAKLYIELLNLPKDGKDAVKLLNYRTPTGSRGDAGDFAMIAYFVLKPRSPKRGRLTVEQVNELLDAIANNNAAKNKGLVKKSLLQLITQSTALEQKWLIRMIIKDLKLGVSQQTIFSIFHPDAAELHNVTTDLEKVCRQLHDPSVSLSDVSIMLFSAFKPML	MASAP QPSPK TVASHVPFADLCSTLERIQTCKSRPEKTK+FKDFLDSWR FH+ALHQKEKDVTDSFYPAMRLILPQLERERMAYGIKETMLAKLYIELLNLPKDGKDAVKLLNYRTPTGSRGDAGDFAMIAYFVLKPRSPKRGRLTVEQVNELLDAIANNNAAKNKGLVKKSLLQLITQSTALEQKWLIRMIIKDLKLGVSQQTIFSIFHPDAAELH+VTTDLEKVCRQLHDPSVSLSDVSIMLFSAFKPML
322235	Query_1037	4-contig_2687_1	1204	gi|166157484|ref|NP_001107233.1|UDP-GlcNAc:betaGal beta-1,3-N-acetylglucosaminyltransferase 5 [Gallus gallus]	NP_001107233	374	1	764.992	1974	0	779	1144	1	366	0	0	356	364	0	366	MFVSPRRVRKCQFLQIFATCFILCVMIFWGPFDNRFVSHMKSYSYRYLVNSYNFVNESLSISRDNVDRVASYQYLMNHREKCQQQDVLLLLFVKSSPENRHRRDAIRQTWGNEKYVRSKLNANIKTLFALGQPTDEMRQRDLYLEDQKYSDLIQQDFLDTFHNLTTKLLLQFSWVNAYCPHARFIMSADDDIFIHMPNLVAYLQNLARMGVQDLWIGRVHRGSPPIRDKTSKYYVPYEMYQWPSYPDYTAGAAYV	MFVSPRRVRKCQFLQIFATCFILCVMIFWGPFDNRFVSHMKSYSYRYLINSYNFVNESLSISRDNVDRVASYQYLMNHREKCQKQDVLLLLFVKSSPENRHRRDAIRQTWGNEKYVRSKLNANIKTLFALGQPTDHLRQRDLYLEDQKYSDLIQQDFLDTFHNLTTKLLLQFSWVNAYCPHARFIMSADDDIFIHMPNLVAYLQSLARMGVQDLWIGRVHRGSPPVRDKTSKYYVPYEMYQWPSYPDYTAGAAYV	MFVSPRRVRKCQFLQIFATCFILCVMIFWGPFDNRFVSHMKSYSYRYL+NSYNFVNESLSISRDNVDRVASYQYLMNHREKCQ+QDVLLLLFVKSSPENRHRRDAIRQTWGNEKYVRSKLNANIKTLFALGQPTD +RQRDLYLEDQKYSDLIQQDFLDTFHNLTTKLLLQFSWVNAYCPHARFIMSADDDIFIHMPNLVAYLQ+LARMGVQDLWIGRVHRGSPP+RDKTSKYYVPYEMYQWPSYPDYTAGAAYV
79227	Query_309	5-contig_25018_1	787	gi|167216110|dbj|BAG06920.1|Fanconi anemia complementation group I [Gallus gallus]	BAG06920	1338	1	742.651	1916	0	364	786	816	1338	0	0	405	410	100	523	LCSWFFRDNAQSHEESLAVLRSSTEFLRYAVSVALQKVQQLEETGQTDGPDGQNPDKMFQNLCKITRVLLWRYTSIPTAVEESGKKKGKSISLLCLEGLLRIFNTMQQLYAARISQFLQALDITDGDAEEADINVTEKAAFQIRQFQRSLVNQLSSAEDDFNSKETQLLITILSTLSKLLDPGSQQ--------------------------------------SPVSLLRELAQDIHACLGDIDQ---------	LLTALFRDNAQSHEESLAVLRSSTEFMRYAVSVALQKVQQLEEMGQTDGPDGQNPEKMFQNLCKITRVLLWRYTSIPTAVEESGKKKGKSISLLCLEGLLRIFNTMQQLYAARIPQFLQALDITDGDAEEADINVTEKAAFQIRQFQRSLVNQLSSAEDDFNSKETQLLITILSTLSKLLDPGSQQFLQFLTWTVKICKENALEDLSCCKGLLTLLFSLHVLYKSPVSLLRELAQDIHACLGDIDQDVEIESRSH	L + FRDNAQSHEESLAVLRSSTEF+RYAVSVALQKVQQLEE GQTDGPDGQNP+KMFQNLCKITRVLLWRYTSIPTAVEESGKKKGKSISLLCLEGLLRIFNTMQQLYAARI QFLQALDITDGDAEEADINVTEKAAFQIRQFQRSLVNQLSSAEDDFNSKETQLLITILSTLSKLLDPGSQQ SPVSLLRELAQDIHACLGDIDQ
373005	Query_36	4-contig_19682_1	540	gi|169730378|gb|ACA64779.1|transporter associated with antigen processing 1 [Meleagris gallopavo]	ACA64779	587	1	665.226	1715	0	1	376	36	411	0	0	347	356	0	376	MAVPYYTGRASDWVAREDELAAILPMVLLGLSSAVTELLCDVAFVGTLSRAQGRLQHRVFAAILRQDITELRADGAGDVAARVTRDAEDVREALGEALSLLLWYLARGVCLFATMAWLSPHMALLTVLALPLLLALPRAVGHFQQALAPQVQKAQAQASEVAVETFQAMATVRSFANEDGAAARYRQRLHQSHRLEKKDVALYTASVWTSGFSALALKVGILYYGGQLVAAGTVSTGDLVTFLLYQMQFTDVVEV	MAVPYYTGRASDWVAREDELAAILPMVLLGLSSAVTELVCDVTFVGTLSRTQSRLQRRVFAAVLRQDIAELRADGAGDVATRVTRDAEDVREALGEALSLLLWYLARGVCLFATMAWLSPRMALLTALALPLLLALPRAVGHFQQALAPQMQKAQARASEVAVETFQAMATVRSFANEDGAAAHYRQRLQQSHRLEKKDVALYTVSAWTSGFSALALKVGILYYGGQLVAAGTVSTGDLVTFLLYQMQFTDVVEV	MAVPYYTGRASDWVAREDELAAILPMVLLGLSSAVTEL+CDV FVGTLSR Q RLQ RVFAA+LRQDI ELRADGAGDVA RVTRDAEDVREALGEALSLLLWYLARGVCLFATMAWLSP MALLT LALPLLLALPRAVGHFQQALAPQ+QKAQA+ASEVAVETFQAMATVRSFANEDGAAA YRQRL QSHRLEKKDVALYT S WTSGFSALALKVGILYYGGQLVAAGTVSTGDLVTFLLYQMQFTDVVEV
32779	Query_995	1-contig_13858_1	742	gi|1786132|dbj|BAA19101.1|DNA topoisomerase I [Gallus gallus]	BAA19101	766	1	1053.89	2724	0	102	625	211	735	0	0	524	524	1	525	RYPEGIKWKFLEHKGPVFAPPYEPLPENVKFYYDGKVMKLSTKAEEVATFFAKMLDHEYTTKEIFRKNFFKDWRKEMTSEEKSTITSLSKCDFTHMSQYFKAQTEARKQMSKEEKQKIKEENERLLKEYGYCVMDNHKERIANFKIEPPGLFRGRGNHPKMGMLKRRIMPEDIIINCSKDSKVPPPPPGHKWKEVRHDNKVTWLVSWTENIQGSIKYIMLNPSSRIKGEKDWQKYETARRLKKCVDKIRNQYRED	RYPEGIKWKFLEHKGPVFAPPYEPLPENVKFYYDGKVMKLSTKAEEVATFFAKMLDHEYTTKEIFRKNFFKDWRKEMTSEEKSTITSLSKCDFTHMSQYFKAQTEARKQMSKEEKQKIKEENERLLKEYGYCVMDNHKERIANFKIEPPGLFRGRGNHPKMGMLKRRIMPEDIIINCSKDSKVPPPPPGHKWKEVRHDNKVTWLVSWTENIQGSIKYIMLNPSSRIKGEKDWQKYETARRLKKCVDKIRNQYRED	RYPEGIKWKFLEHKGPVFAPPYEPLPENVKFYYDGKVMKLSTKAEEVATFFAKMLDHEYTTKEIFRKNFFKDWRKEMTSEEKSTITSLSKCDFTHMSQYFKAQTEARKQMSKEEKQKIKEENERLLKEYGYCVMDNHKERIANFKIEPPGLFRGRGNHPKMGMLKRRIMPEDIIINCSKDSKVPPPPPGHKWKEVRHDNKVTWLVSWTENIQGSIKYIMLNPSSRIKGEKDWQKYETARRLKKCVDKIRNQYRED
380884	Query_84	3-contig_30054_1	342	gi|17907763|dbj|BAB79445.1|myosin heavy chain [Gallus gallus]	BAB79445	1941	1	715.301	1845	0	4	342	66	423	0	0	335	338	19	358	RQTRVVKEDELQPMNPPKFDMIEDMAMLTHLNEASVLYNLKRRYSHWMIYTYSGLFCVTINPYKWLPVYTAPVVAAYKGKRRSEAPPHIYSIADNAYNDMLR-----------KSGAGKTVNTKRVIQYFAIVAALGDTPGKKL--------GTLEDQIIEANPAMEAFGNAKTIRNDNSSRFGKFIRIHFGPSGKLASADIDIYLLEKSRVIFQQPKERSYHIYYQILSGKKPELQDMLLLSLNPYDYHFCSQG	KQTRVVKEDELQAMNPPKFDMIEDMAMLTHLNEASVLYNLKRRYSHWMIYTYSGLFCVTINPYKWLPVYTAPVVAAYKGKRRSEAPPHIYSIADNAYNDMLRNRENQSMLITGESGAGKTVNTKRVIQYFAIVAALGDTPGKKVAALATKTGGTLEDQIIEANPAMEAFGNAKTIRNDNSSRFGKFIRIHFGPSGKLASADIDIYLLEKSRVIFQQPKERSYHIYYQILSGKKPELQDMLLLSLNPYDYHFCSQG	+QTRVVKEDELQ MNPPKFDMIEDMAMLTHLNEASVLYNLKRRYSHWMIYTYSGLFCVTINPYKWLPVYTAPVVAAYKGKRRSEAPPHIYSIADNAYNDMLR +SGAGKTVNTKRVIQYFAIVAALGDTPGKK+ GTLEDQIIEANPAMEAFGNAKTIRNDNSSRFGKFIRIHFGPSGKLASADIDIYLLEKSRVIFQQPKERSYHIYYQILSGKKPELQDMLLLSLNPYDYHFCSQG
139697	Query_402	12-contig_6242_1	507	gi|191252799|ref|NP_001006581.2|serine/threonine-protein kinase RIO2 [Gallus gallus]	NP_001006581	551	1	738.028	1904	0	1	451	8	466	0	0	367	394	14	462	MLRYLSREHFRVLTAVSGSRRGGLGGLVLPGALPAR--GVREGACRAAPRGPGTG-------ASAVQGYRLTNAGYDYLALKTLSSRQVINSVGNQMGVGKESDIYIVANEDEQQFAMKLHRLGRTSFRSLKNKRDYHKHRHKMSWLYLSRLAAMKEFAYMKALYDRKFPVPKPIDYNRHAVIMELLDGYPLCQVHQLEDPASVYSELMDLIVKLANHGLIHGDFNEFNLILDNNDHVTMIDFPQMISTSHPNAE	MLRYLSKEHFRVLTAVE---MGMKNHEIVPASLIASIASLKHGGCNKILRELGKHRLLAYERTKTVQGYRLTNAGYDYLALKTLSSRQVISSVGNQMGVGKESDIYIVANEDEQQFAMKLHRLGRTSFRSLKNKRDYHKHRHKMSWLYLSRLAAMKEFAYMKALHDRKFPVPKPVDYNRHAVIMELLDGYPLCQVRQMEDPASVYSELMDLIVKLANHGLIHGDFNEFNLILDNDDHVTMIDFPQMISTSHPNAE	MLRYLS+EHFRVLTAV G ++P +L A ++ G C R G VQGYRLTNAGYDYLALKTLSSRQVI+SVGNQMGVGKESDIYIVANEDEQQFAMKLHRLGRTSFRSLKNKRDYHKHRHKMSWLYLSRLAAMKEFAYMKAL+DRKFPVPKP+DYNRHAVIMELLDGYPLCQV Q+EDPASVYSELMDLIVKLANHGLIHGDFNEFNLILDN+DHVTMIDFPQMISTSHPNAE
378768	Query_1028	53-contig_9171_1	1401	gi|193881273|gb|ACF27188.1|early growth response 1, partial [Colinus cristatus]	ACF27188	400	1	702.59	1812	0	813	1203	1	389	0	0	385	387	2	391	TTRLPPITYTGRFSLEPAPNGSNALWPEPLFSLVSGLVSMANAPPTSTPSSSSPSSSQSTPLSCSVQASENSPIYSAAPTFPTSSSDIFPEPQTQSFPNPSGAPIQYPPPAYPTAKTNFQVPMIPDYLFPQQQSELNLITADQKPFSSLETRAQQPSLTPLSTIKAFATQTGSQELKTLNTNYQSQLIKPSRMRKYPNRPSKTPPHERPYACPVESCDRRFSRSDELTRHIRIHTGQKPFQCRICMRNFSRSDHL	TTRLPPITYTGRFSLEPAPNGSNALWPEPLFSLVSGLVSMANAPPTSTPSSSSPSSSQSTPLSCSVQASENSPIYSAAPTFPTSSSDIFPEPQTQSFPNPSGAPIQYPPPAYPTAKTNFQVPMIPDYLFPQQQSELNLITADQKPFSSLETRAQQPSLTPLSTIKAFATQTGSQELKTLNTNYQSQLIKPSRMRKYPNRPSKTPPHERPYACPVESCDRRFSRSDELTRHIRIHTGQKPFQCRICMRNFSRSDHL	TTRLPPITYTGRFSLEPAPNGSNALWPEPLFSLVSGLVSMANAPPTSTPSSSSPSSSQSTPLSCSVQASENSPIYSAAPTFPTSSSDIFPEPQTQSFPNPSGAPIQYPPPAYPTAKTNFQVPMIPDYLFPQQQSELNLITADQKPFSSLETRAQQPSLTPLSTIKAFATQTGSQELKTLNTNYQSQLIKPSRMRKYPNRPSKTPPHERPYACPVESCDRRFSRSDELTRHIRIHTGQKPFQCRICMRNFSRSDHL
192647	Query_818	3-contig_2200_1	1048	gi|19548984|gb|AAK83556.1|neuropeptide Y receptor Y5 [Gallus gallus]	AAK83556	443	1	716.842	1849	0	256	691	1	439	0	0	357	384	3	439	MDLGFKDYTNRTATKNTSAATKNFSAWEDYKSSVDDIQYFLIGLYTLISLAGFVGNLLVLTALTRRKQKTIINILIGNLAFSDILVVLFCSPFTLTSVLLDRWMFGTVMCHVMPFLQCTSVLVSTLMLISIAAVRYRMIKYPLSSNLTAKHGYVLIATIWAAGCAICSPLPVFHKLVDLHKTLSLEALQNRLLCIESWPSDSYRIAFTICLLLLQYILPLACLTASHTSVCRSVGSRLSSREGKFQENEMINLTL	MDLGFKDYTNRTPTKNTSATTKNFSAWEDYKSSVDDIQYFLIGLYTLISLAGFVGNLLVLTALTKRKQKTIINILIGNLAFSDILVVLFCSPFTLTSVLLDRWMFGTVMCHIMPFLQCTSVLVSTLMLISIAAVRYRMVKYPLSSNLTAKHGYFLIVIIWAVGCAICSPLPVFHKIVDLHKTLNLEALENRLLCIESWPSDSYRIAFTISLLLMQYILPLVCLTASHTSVCRSVGSRLSSKEGKFQENEMINLTL	MDLGFKDYTNRT TKNTSA TKNFSAWEDYKSSVDDIQYFLIGLYTLISLAGFVGNLLVLTALT+RKQKTIINILIGNLAFSDILVVLFCSPFTLTSVLLDRWMFGTVMCH+MPFLQCTSVLVSTLMLISIAAVRYRM+KYPLSSNLTAKHGY LI IWA GCAICSPLPVFHK+VDLHKTL+LEAL+NRLLCIESWPSDSYRIAFTI LLL+QYILPL CLTASHTSVCRSVGSRLSS+EGKFQENEMINLTL
314855	Query_1022	3-contig_27439_1	1130	gi|195539513|ref|NP_001124209.1|calcium-independent phospholipase A2-gamma [Gallus gallus]	NP_001124209	803	1	661.759	1706	0	119	490	1	373	0	0	333	350	1	373	MTVHLSLDAYLFFVINPKSLWWKQRNKYFYLYRPEVCWRISHAIHHRVFHTGEPQCKWARSRTLWYNKNIFSRDFLYYRVSKLLTSSSKGLTKVSSRMSRIKNTIESVSKAVSGTHSELVSRIARLKSHSGSLGKDTKCNADENNPNVNLESGKQVSDARTQEDCTRGLAARKSSNTNENVEFVLNSTSGINRDTPEDSASAKNHLFHISYLSTSFGETYNFVADHINWYFHNNSAMDQEKKRNALLQGSKGEAK	MTVHLSLDAYLFFVINPKSLWWKQRNKYLCLYRPKVCWRISHAIHLRVFHTGEPQYKWARSRTLWYSKHIFSRDFLYYRVSKLLNSSSKGLTKVNNRMSRIKNTIESVSKAVSGTHSELVSRIARLKSHSGTLGKDTKSNADENNLNVNLESGKQVPDARTQEDCNRGLAAKKSSNTNENLEFVLNSTSGTNQDIPEDSASAKNHLFHISYLSTSFGETYNFVADHINWYFSNNFVMDQEKKKNALLQGSKSETK	MTVHLSLDAYLFFVINPKSLWWKQRNKY LYRP+VCWRISHAIH RVFHTGEPQ KWARSRTLWY+K+IFSRDFLYYRVSKLL SSSKGLTKV++RMSRIKNTIESVSKAVSGTHSELVSRIARLKSHSG+LGKDTK NADENN NVNLESGKQV DARTQEDC RGLAA+KSSNTNEN+EFVLNSTSG N+D PEDSASAKNHLFHISYLSTSFGETYNFVADHINWYF NN MDQEKK+NALLQGSK E K
145889	Query_238	6-contig_9285_1	924	gi|199561570|ref|NP_990840.2|fibroblast growth factor receptor 3 precursor [Gallus gallus]	NP_990840	827	1	994.956	2571	0	295	924	164	738	0	0	508	517	91	648	GVPFWTRPDKMEKKLLAVPAANTVRFRCPAGGNPTPTIYWLKNGKEFKGEHRIGGIKKRFLPEFVPSGSYLRSDSKVSVTNQVIRRSLKLRHQQWSLVMESVVPSDRGNYTCVVENKYGNIRHTYQLDVLERSPHRPILQAGLPANQTVVVGSNVEFHCKVYSDAQPHIQWLKHVEVNGSKYGPDGTPYVTVLKRNILISIKAQRDAQHVEFPHKSKLRTESSPDQMDKLNATAGVNTTDKELEILYLRNVTFED	GVPFWTRPDKMEKKLLAVPAANTVRFRCPAGGNPTPTIYWLKNGKEFKGEHRIGGIK--------------------------------LRHQQWSLVMESVVPSDRGNYTCVVENKYGNIRHTYQLDVLERSPHRPILQAGLPANQTVVVGSNVEFHCKVYSDAQPHIQWLKHVEVNGSKYGPDGTPYVTVLK--------------------------------------TAGVNTTDKELEILYLRNVTFED	GVPFWTRPDKMEKKLLAVPAANTVRFRCPAGGNPTPTIYWLKNGKEFKGEHRIGGIK LRHQQWSLVMESVVPSDRGNYTCVVENKYGNIRHTYQLDVLERSPHRPILQAGLPANQTVVVGSNVEFHCKVYSDAQPHIQWLKHVEVNGSKYGPDGTPYVTVLK TAGVNTTDKELEILYLRNVTFED
96268	Query_615	10-contig_9181_1	742	gi|20070438|gb|AAF00982.3|AF148716_1ovocleidin-116 [Gallus gallus]	AAF00982	743	1	1005.36	2598	0	21	741	14	743	0	0	552	592	41	746	GTVLPTP----------------ILLRGCNTKHGFFILNHMYSFFTWRNQTQVKKEEGDHQGTVHGRWLGKVDGEAPGQSTGSSHMLDDKDSPKPHSHTTPASKGEGRALLPSIGGRGGVHPTSTSVEGSGDMGSMLLGEIIDGEEGLPQSTHPGGPHGDGNGGNGVPLGVLVDGAVTEGGERATDVEGAGGEGGSHATAPDQEQVGTMGTGDSAITSVT--------KKEDVHVDAEGVNEFTYIPDTDAVTIT	GTVLPTPVSLPARARGNCPGQHQILLKGCNTKHGFYIFQYIYSHLMQKNQTQVKKEEGDHQGTIHGHWLGKVDGEAPGQGVGSSHVPEDKDSPKPHSHITPASKGEGRALRPGIGDSNSVYPTSTSVEGSGDMGSILLGEIINGEDGLPHSTHPGGPHGDGDGGNGV----LVDGAVTAGRERASGSKGAGSEGGSHATVPDQGQAGTMGTGDSAITSVTDSAITSVTKKEDVHVDTEGIDEFAYIPDVDAVTIT	GTVLPTP ILL+GCNTKHGF+I ++YS +NQTQVKKEEGDHQGT+HG WLGKVDGEAPGQ GSSH+ +DKDSPKPHSH TPASKGEGRAL P IG V+PTSTSVEGSGDMGS+LLGEII+GE+GLP STHPGGPHGDG+GGNGV LVDGAVT G ERA+ +GAG EGGSHAT PDQ Q GTMGTGDSAITSVT KKEDVHVD EG++EF YIPD DAVTIT
29996	Query_827	2-contig_18694_1	600	gi|22255339|dbj|BAC07533.1|Grg4 [Gallus gallus]	BAC07533	773	1	710.294	1832	0	89	466	213	590	0	0	376	376	0	378	FRTAEKHRNSTDYSSESKKQKTEEKEIAARYDSDGEKSDDNLVVDVSNEDPSSPRGSPAQSPRENGLDKTRLLKKDAPISPASIASSSSTPSSKSKELSLNEKSTTPVSKSNTPTPRTDAPTPGSNSTPGLRPVPGKPPGVDPLASGLRTPMAVPCPYPTPFGIVPHAGMNGELTSPGAAYAGLHNISPQMSAAAAAAAAAAAYGRSPVVGFDPHHHMRVPGIPPNLTGIPGGKPAYSFHVSADGQMQPVPFPPD	FRTAEKHRNSTDYSSESKKQKTEEKEIAARYDSDGEKSDDNLVVDVSNEDPSSPRGSPAHSPRENGFDKTRLLKKDAPISPASIASSSSTPSSKSKELSLNEKSTTPVSKSNTPTPRTDAPTPGSNSTPGLRPVPGKPPGVDPLASGLRTPMAVPCPYPTPFGIVPHAGMNGELTSPGAAYAGLHNISPQMSAAAAAAAAAAAYGRSPVVGFDPHHHMRVPGIPPNLTGIPGGKPAYSFHVSADGQMQPVPFPPD	FRTAEKHRNSTDYSSESKKQKTEEKEIAARYDSDGEKSDDNLVVDVSNEDPSSPRGSPA SPRENG DKTRLLKKDAPISPASIASSSSTPSSKSKELSLNEKSTTPVSKSNTPTPRTDAPTPGSNSTPGLRPVPGKPPGVDPLASGLRTPMAVPCPYPTPFGIVPHAGMNGELTSPGAAYAGLHNISPQMSAAAAAAAAAAAYGRSPVVGFDPHHHMRVPGIPPNLTGIPGGKPAYSFHVSADGQMQPVPFPPD
34754	Query_23	18-contig_13810_1	2157	gi|224043526|ref|XP_002197749.1|PREDICTED: similar to Exophilin 5 [Taeniopygia guttata]	XP_002197749	1962	1	1351.65	3497	0	120	1235	148	1271	0	0	738	854	56	1148	PNVYLKSMATERSCGRMHDLETAL------DGEKLTPFKINYRKQNQVFVFSCTVLNDLDDQLAQEQSQDPLDKTFSTSSASNVQHNQDAFLASKSHAANRGQLRNDWSDIPSTFFPDGLRTIRAKDEHKIIIRPRKLHSAYINWQQTAFQDDFKYGSAADGSSHLRSSRLPCVSFGRSSEGSLYPPSVAQNSGFRHKSYMDRGTAGRSYSVCSLRRCPSSVSSDQLSASSLQCPLARENNNGFVPRFGRQNPKR	PPSKVEEMATAEMCNSPMSTETSSHSFDTNQNETMEKNTLEWNEQLEKEIFS--VLSDLDDQLAQEQTQDPLDRIVSTSSASNIQSSS-ACPTSKRQTASRGQQRNDWSDIPSTFFPDGMRTLRAKDEHKIFIRPRKLHSAYINWHQRAFQEDCSYGDAVDGNPHLHCRRLSAVSFGRSSEGSLYPPSVTHNSGFRHKGCVNRDTAGRSYSVCSLRRCPSSVSSDQLSASSLQHPLARESKNGFVPRFGRQNPKR	P ++ MAT C ET+ E + + + +Q + +FS VL+DLDDQLAQEQ+QDPLD+ STSSASN+Q + A SK A+RGQ RNDWSDIPSTFFPDG+RT+RAKDEHKI IRPRKLHSAYINW Q AFQ+D YG A DG+ HL RL VSFGRSSEGSLYPPSV NSGFRHK ++R TAGRSYSVCSLRRCPSSVSSDQLSASSLQ PLARE+ NGFVPRFGRQNPKR
169017	Query_1046	8-contig_25449_1	1291	gi|224043607|ref|XP_002198280.1|PREDICTED: similar to mastermind-like 2 [Taeniopygia guttata]	XP_002198280	920	1	658.292	1697	0	269	657	3	385	0	0	352	365	6	389	ILQGSLKRKLVVNLSPVNNKRPNGVSDSSFLDIKRIRVGDNISMGQGGHHVNNCQTQAMSGTMSVGQGSQRKTSNLANNTHTSGNGMFNMTLKEVKKEPGETMSCSKHLDGQMPHENLFPNRYGEDSGEQMMDPELQELFNELTNISVPPMSDLELENMINATIKQDEPFNIDLGQQSQRGPVRPLQMDKMVIKSEYAPGMNQAPVGSPQMRPSSTGPAFTMAAAAMSTSSPIPSVPQNQTQVAQVSSASSRPLP	LLQGSLKRKLVVNLSPVN-KSPNGVSESSFLDIKRIRVGDNIPVGQGGQHVNNCQSQSMSGAMTVGQGSQRKASSLANNTHASGNDMFNMTLKEVKKEPGETMSCSKHLDGQTSHENMFPNRYGEDSWDQMMDLELQELFNELTNISVPPMSDVELENMINATIKQDEPFNIDLGQQSQRGPVRSLQMDKMVIKSEYAAGINQAPVGSPQMRPSSTGPAFTMATTAMSASSPIPSVP--QTQVSQVSSASSRPLP	+LQGSLKRKLVVNLSPVN K PNGVS+SSFLDIKRIRVGDNI +GQGG HVNNCQ+Q+MSG M+VGQGSQRK S+LANNTH SGN MFNMTLKEVKKEPGETMSCSKHLDGQ HEN+FPNRYGEDS +QMMD ELQELFNELTNISVPPMSD+ELENMINATIKQDEPFNIDLGQQSQRGPVR LQMDKMVIKSEYA G+NQAPVGSPQMRPSSTGPAFTMA AMS SSPIPSVP QTQV+QVSSASSRPLP
44325	Query_573	5-contig_11841_1	2046	gi|224047346|ref|XP_002195850.1|PREDICTED: hypothetical protein [Taeniopygia guttata]	XP_002195850	1281	1	1014.6	2622	0	1035	1846	418	1227	0	0	590	662	34	828	RHFKDVFHSSAQSREGTSCQGGVPKGISAVAQYASLSKSHSCNSFQSDSTQEHEHCEVGESIDFPSDDDDEG------STLGEDDDNTSLSELGKDALPKRPQSSPAVTDNTQKQSMKRTENAEAEEMILKMKDAISEKIKFVPAKTRHKEWMEDESGAATLTARPSTATGRQKTFGKQRRSRSEESLRSQAEDPTLLELQRTQKELSKRLETFYGKTETDNNKEPWKLRTTHCLQDEQVASRSSSKLKACLSKN	RHFKDMFHSSVQSREGTSCQGGVTEATSAVPQYASVSKSRSDN-LQSDSTQEGERFKICESTDFPSDEDEDDDDDEEESMLGEDDDSTSLSEMGKDALP-RSLSSPALTDSIQRQSIKRTENADTEEIILKMKDAISEKIKFVPAKSRRKEWIEDESGRAVLAKRPSTATGRQRRYGKQRRSRSEESLRSQAEDPTLLELQRTQKELSKRLEMLYGK-DMANNLELWKSRTAPYLKDDQITSRSSRKLKAGLSKN	RHFKD+FHSS QSREGTSCQGGV + SAV QYAS+SKS S N QSDSTQE E ++ ES DFPSD+D++ S LGEDDD+TSLSE+GKDALP R SSPA+TD+ Q+QS+KRTENA+ EE+ILKMKDAISEKIKFVPAK+R KEW+EDESG A L RPSTATGRQ+ +GKQRRSRSEESLRSQAEDPTLLELQRTQKELSKRLE YGK + NN E WK RT L+D+Q+ SRSS KLKA LSKN
378196	Query_46	20-contig_461_1	3603	gi|224047528|ref|XP_002197243.1|PREDICTED: hypothetical protein [Taeniopygia guttata]	XP_002197243	1325	1	979.548	2531	0	2565	3565	217	1160	0	0	568	691	57	1001	LAQTLQLLQKCVPLLHAAKRCHLTRSRAQQVDSSQNSAFQLMERTIQEFVSLLADSTGSKETQDRHGAFSQHVHRLLALLYHPDPAHLSDSEFSAHVEAVVFFCMLLAETCRADLKQELVKRCWVLLQHRKSICCHVSQKEGRTGPSWGESSLEEKCHAMGKEVEDLDQAVLKATLHQILHAFSKAKEPLRQLVEEALSLAGTGCFPAGQGGLLKKLQPLTAAFFAHAQQMLRVTDLVLARCTKTQIAREIQDRA	LAQTLQLLHKCVSLIHTAKQDTLMYSRDSQADLSQDSVFHLTERTIRELLSLLM------EPQDRSGIFSQQVSRLQALLSHPDPLRLSEGGFSSHLEVVILHGMLLAESSRLDLQMELLERCWVLLQLRRSICSHISQREGQ-----GEHGLERQCHLLREELENLDRAVLRATLCQILDGFFEEKEPLRQLVEGALSFAHSGCYPAGPGGILRKLQPLIAAFFAQAQRILRAADLLLARCAKAQNARKIREGV	LAQTLQLL KCV L+H AK+ L SR Q D SQ+S F L ERTI+E +SLL E QDR G FSQ V RL ALL HPDP LS+ FS+H+E V+ MLLAE+ R DL+ EL++RCWVLLQ R+SIC H+SQ+EG+ GE LE +CH + +E+E+LD+AVL+ATL QIL F + KEPLRQLVE ALS A +GC+PAG GG+L+KLQPL AAFFA AQ++LR DL+LARC K Q AR+I++
143735	Query_16	8-contig_1873_1	621	gi|224047677|ref|XP_002191325.1|PREDICTED: similar to cytochrome P450 1B1 [Taeniopygia guttata]	XP_002191325	545	1	971.074	2509	0	79	619	1	544	0	0	501	521	3	544	MALERLGEALRSTPPLQSSLLLLLCLLAAVHLGKLLLQRRCRGRQGQRRAPPGPFPWPLIGNAAQLGSAPHLSFARLASTYGAVFQLRLGRWPVVVLNGESAIRQALVRQGAAFAGRPAFPSFRLVSGGRSLAFGGYSELWKL---HRRAAHATVRAFSTGSPATRRLLERHLLGEARALVALLVRGSAGGAFLDPSRVLLVAVANVMSALCFGRRYSHGDGEFLRLVGRNEQFGRAVGAGSLVDALPWLRRFPS	MALERLGEALRGMPPLQSSLLLLLCLLAAIHLGKLLLQHQQRRRQGQRRAPPGPFPWPLIGNAAQLGSAPHLSFARLASTYGAVFQLRLGRWPVVVLNGERAIRQALVRQGAAFAGRPPFPSFQLVSGGLSLAFGGYSELWKFQWRYKHTTHATVRAFFTGSPATRRMLERHLVSEARALMALLVRGSAGGAFLDPSRVLVVAVANVMSALCFGRRYSHGDGEFLRIVGRNEQFGRAVGAGSLVDALPWLQRFPS	MALERLGEALR PPLQSSLLLLLCLLAA+HLGKLLLQ + R RQGQRRAPPGPFPWPLIGNAAQLGSAPHLSFARLASTYGAVFQLRLGRWPVVVLNGE AIRQALVRQGAAFAGRP FPSF+LVSGG SLAFGGYSELWK ++ HATVRAF TGSPATRR+LERHL+ EARAL+ALLVRGSAGGAFLDPSRVL+VAVANVMSALCFGRRYSHGDGEFLR+VGRNEQFGRAVGAGSLVDALPWL+RFPS
24488	Query_160	1-contig_34034_1	667	gi|224047998|ref|XP_002196016.1|PREDICTED: pleiomorphic adenoma gene-like 1 [Taeniopygia guttata]	XP_002196016	804	1	1210.28	3130	0	25	666	125	766	0	0	576	599	0	642	VLKDGGKYFLDTPNEDCGNWMMFVRLARNQEEQTLVAYQHCGEVYFTTVKPIEPHTELKVWYAADYAKFMETSAVFIKEESDVSPLPVVAKEPVDPWICSSCRSTFATFALLESHQCINKDRVLTTRLRPPNKLGSLKAKSKFKGKLRGSALGKSIAQCYGTISCSSAAKLSCASSGNTCDALVRFIPKWRNGRSSLLKEREVKQPDSYPCRLCGKIFDSIEKLTVHTYVHKAERPYKCSQHGCTKAFISKYKLL	VLKDGGKYFLDTPNEDCGNWMMFVRLARNQEEQTLVAYQHCGEVYFTTVKPIEPHTELKVWYAADYAKFMEASAVFIKEESDVSPLPSVAKEPVDPWICSSCGSTFATFALLESHQCIHKERVLPTRFRPPNKLGPVKAKNKLKGKLRGASLGKSITQCFGTISCSSAAKFSCASSGSTCGALVRFIPKWRNGRSSLLKGKEVKQPDSYPCRLCGKIFDSIDKLTVHTYAHKGERPYKCSQHGCTKAFISKYKLL	VLKDGGKYFLDTPNEDCGNWMMFVRLARNQEEQTLVAYQHCGEVYFTTVKPIEPHTELKVWYAADYAKFME SAVFIKEESDVSPLP VAKEPVDPWICSSC STFATFALLESHQCI+K+RVL TR RPPNKLG +KAK+K KGKLRG++LGKSI QC+GTISCSSAAK SCASSG+TC ALVRFIPKWRNGRSSLLK +EVKQPDSYPCRLCGKIFDSI+KLTVHTY HK ERPYKCSQHGCTKAFISKYKLL
157438	Query_713	2-contig_9068_1	1455	gi|224048666|ref|XP_002195379.1|PREDICTED: similar to polyprotein [Taeniopygia guttata]	XP_002195379	1542	1	1187.56	3071	0	465	1397	517	1458	0	0	587	722	27	951	LWATGHPGRSKRAQRVVIKPKPGATPIRIKQYPLKLGDRRGVKALIGKYIQ-------------EKLPSVTSGKDYRLVQDLRAINKIVEDLYPVVANPYTLLTRLKAEWKYFTVLDLKDAFFCLPLAEESQKLFAFEWENPDTGRKTQLPWTVLPQGFKNSPTVFGNQLAKELEEWDPPSSNGALLQYVDDLLIATETEEECFQWTVSLLNFLGLSGYRVSKQKAQIIQTG----GTLCRGGQRELGRERKEAI	VWASDVPGRAKNASPIQIRLKEGKHPVRVKQYPLRREDREGISPIIENFLRLGILKECQSDFNTPILPVRKPDGSYRLVQDLRAVNKVTEDLHPVVANPYTLLTCLTPELTWFTVLDLKDAFFCLPIHEASQKIFAFEWESPKSGRKTQLTWTRLPQGYKNSPTLFGEQLAKELETWKAPPEEGKLLQYVDDILIATRTKEACVAWTVSLLNFLGLQGYRVSRKKAQVVTQKVIYLGYEVSAGQRSLGQGRKEAI	+WA+ PGR+K A + I+ K G P+R+KQYPL+ DR G+ +I +++ LP YRLVQDLRA+NK+ EDL+PVVANPYTLLT L E +FTVLDLKDAFFCLP+ E SQK+FAFEWE+P +GRKTQL WT LPQG+KNSPT+FG QLAKELE W P G LLQYVDD+LIAT T+E C WTVSLLNFLGL GYRVS++KAQ++ G GQR LG+ RKEAI
333331	Query_521	3-contig_12501_1	917	gi|224048845|ref|XP_002189298.1|PREDICTED: similar to KIAA0758 protein [Taeniopygia guttata]	XP_002189298	1323	1	1050.04	2714	0	1	830	478	1317	0	0	546	650	44	857	MSSSVNTSVSEGYGFSLKCESDVSNYDSISWEIHSGDRIQAVECAACIRTNKSTATSMLTVNTATPDWNGTYICTFSQDSLNSSASMTVNVISLPLKQHILLDPIAAPIPCRTTQALNCCISADSMEDYSVTFVVQGKEFQAEKK-QGNILCYSYNYTETEC-RQGELTAYCKFVNSIGQEVSSERMRLSPIPDEDISCSGNNVFGREGDILIKPCSVLN--ASFIRGNKVYKCCSKSWKMERNNCLSEQMNSLL	MSSSTNSTVSEGYGFNVTCKSDVSNYDSISWKIQSGNDTKTVDCDMCIKNSKIPAVSVLTVKSASQDWRGTYICTFSQKNLDSSANITIEVVSLPLKQNILIDPIATSIHCQVPHALECCISAKTVRDYRVTFLVQQNEFQVERKRKDNLFCYIYNYTEKECDKEKEIVAYCRFINRIGQGVDSEHIRLHLIPGKKISCSDSLGIGTEGAILIKPCCDVKDPKGFTRGNITYQCINSSWKVLRNDCLSGPINDLL	MSSS N++VSEGYGF++ C+SDVSNYDSISW+I SG+ + V+C CI+ +K A S+LTV +A+ DW GTYICTFSQ +L+SSA++T+ V+SLPLKQ+IL+DPIA I C+ AL CCISA ++ DY VTF+VQ EFQ E+K + N+ CY YNYTE EC ++ E+ AYC+F+N IGQ V SE +RL IP + ISCS + G EG ILIKPC + F RGN Y+C + SWK+ RN+CLS +N LL
255332	Query_835	3-contig_18427_1	575	gi|224049663|ref|XP_002196623.1|PREDICTED: guanylate cyclase 1, soluble, beta 3 [Taeniopygia guttata]	XP_002196623	627	1	905.205	2338	0	42	575	15	526	0	0	454	469	36	541	ESNAFLTSTDSR--QIVEVLREAQLDEEGQFLVRIIYDDSKTYDLVAAASKVLNTSGFKKEEEDSTTKSNIYTFWKNIGLEKLQIILKEDT-----NLDALHDHLATIYPGMRAPSFRCTDAEKGKGLILHYYSEREGLQDIVIGIIKTVAQQIHACTVLRIVPDFENTLEFSLLHNAMWITSSFYKKVIQQRNEECDHIQFLIEEKESKEEDYYEDLDRFEENGTQESRISPYTFCKAFPFHIIFDRDLVVTQC	EANVFATAAVAPYVKLVTMGKEAQLDEEGQFLVRIIYDDSKTYDLVAAASKVLN---LNAGEILQMFGKMFFVFCQESGYDTILRVLGSNVREFLQNLDALHDHLATIYPGMRAPSFRCTDAEKGKGLILHYYSEREGLQDIVIGIIKTVAQQIHG--------------------------TEIDMKVIQQRNEECDHIQFLIEEKESKEEDYYEDLDRFEENGTQESRISPYTFCKAFPFHIIFDRDLVVTQC	E+N F T+ + ++V + +EAQLDEEGQFLVRIIYDDSKTYDLVAAASKVLN E + F + G + + +L + NLDALHDHLATIYPGMRAPSFRCTDAEKGKGLILHYYSEREGLQDIVIGIIKTVAQQIH + KVIQQRNEECDHIQFLIEEKESKEEDYYEDLDRFEENGTQESRISPYTFCKAFPFHIIFDRDLVVTQC
71242	Query_634	1-contig_5755_1	707	gi|224049990|ref|XP_002188140.1|PREDICTED: PDS5, regulator of cohesion maintenance, homolog A [Taeniopygia guttata]	XP_002188140	1328	1	725.702	1872	0	44	592	287	874	0	0	368	442	75	606	SNDNEERLQVVKLLAKMFGAKDSELASQNKPLWQCYLGRFNDIHVPIRLECVKFASHCLMNHPDLAKDLTEYLKVRSHDPEEAIRHDVIVSIVTAAKKDLLLVNDHLLNFVRERTLDKRWRVRKEAMMGLAQIYKKYSLQSEAGKEAAKQISWIKDKLLHIYYQNSIDDRLLVERIFAQYMVPHNLETNERMKCLYYLYATLDSNAVKALNEMWKCQNLLRHQVKDLVDLIKQPKTK-----------TI-----	SNDGEERLAVVRLLAKLFGSKDSDLATQNRPLWQCFLGRFNDIHVPVRLESVKFASHCLMNHPDLAKDLTEYLKVRSHDPEEAIRHDVIVTIITAGKRDLSLVNDQLLGFVRERTLDKRWRVRKEAMMGLAQLYKKYCLHAEAGKDAAEKVSWIKDKLLHIYYQNSIDDKLLVEKIFAQYLVPHNLETEERMKCLYYLYASLDPNAVKALNEMWKCQNMLRSHVRELLDLHKQPTSEANSAAMFGKLMTIARNLP	SND EERL VV+LLAK+FG+KDS+LA+QN+PLWQC+LGRFNDIHVP+RLE VKFASHCLMNHPDLAKDLTEYLKVRSHDPEEAIRHDVIV+I+TA K+DL LVND LL FVRERTLDKRWRVRKEAMMGLAQ+YKKY L +EAGK+AA+++SWIKDKLLHIYYQNSIDD+LLVE+IFAQY+VPHNLET ERMKCLYYLYA+LD NAVKALNEMWKCQN+LR V++L+DL KQP ++ TI
247660	Query_882	1-contig_3054_1	644	gi|224050568|ref|XP_002191472.1|PREDICTED: PRP19/PSO4 pre-mRNA processing factor 19 homolog (S. cerevisiae) [Taeniopygia guttata]	XP_002191472	504	1	811.987	2096	0	15	496	7	443	0	0	412	422	47	483	LSNEVPEHPCVSPVSNHVYERRLIEKYIAENGTDPVNNQPLSEEQLIDIKVAHPIRPKPPSATSIPAILKALQDEWDAVMLHSFTLRQQLQTTRQELSHALYQHDAACRVIARLTKEVTAAREALATLKPQAGLIVPQAVPSSQPNVAGAGESMDLGELAGMTPEIIQKLQDKATVLTTERKKRGKTVPEELVKPEELSKYRQVASHVPLSASRRDCTAPASRASWPWTSVLP-TPTRSSPVREPSPRSGVFGDG	ISNEVPEHPCVSPVSNHVYERRLIEKYIAENGTDPVNNQPLSEEQLIDIKVAHPIRPKPPSATSIPAILKALQDEWDAVMLHSFTLRQQLQTTRQELSHALYQHDAACRVIARLTKEVTAAREALATLKPQAGLIVPQAVPSAQPNVAGAGEAMDLGELAGMTPEIIQKLQDKATVLTTERKKRGKTVPEELVKPEELSKYRQVASHVGLHS-----------ASIPGILALDLCPSDTNKI-------------	+SNEVPEHPCVSPVSNHVYERRLIEKYIAENGTDPVNNQPLSEEQLIDIKVAHPIRPKPPSATSIPAILKALQDEWDAVMLHSFTLRQQLQTTRQELSHALYQHDAACRVIARLTKEVTAAREALATLKPQAGLIVPQAVPS+QPNVAGAGE+MDLGELAGMTPEIIQKLQDKATVLTTERKKRGKTVPEELVKPEELSKYRQVASHV L + AS P L P+ ++ +
103275	Query_1107	2-contig_5856_1	535	gi|224051409|ref|XP_002199739.1|PREDICTED: neuronal PAS domain protein 3 [Taeniopygia guttata]	XP_002199739	942	1	882.478	2279	0	99	534	507	942	0	0	434	436	0	436	EDNENSKSDEKGNQSENSEDPESDRKKSGNQSDNEMNCNDDGNSSSNQDSRDSDDSFENSDFENQKAPEDSFGTLGSMQIKVERFVESESDLRLQNCESLTSDSAKDSDSAGEVNAQSSSKHQKRKKRRKKQKGGSMTRRRLSSTSSPNGLDSALVDQPQLLSSPNSASVLKIKTEISEPINFDNDSSIWNYPPNREISRNESPYSMTKPPSSEHFPSPQASSSLHVSIPDSVLTPPGTENTASRKTQFSTSSNS	EDNENSKSDEKGNQSENSEDPESDRKKSGNQSDNEMNCNEDGNSSSNQDSRDSDDSFENSDFENQKAPEDSFGTLGSMQIKVERYVESESDLRLQNCESLTSDSAKDSDSAGEVNAQSSSKHQKRKKRRKKQKGGSMTRRRLSSTSSPNGLDSALVDQPQLLSSPNSASVLKIKTEISEPINFDNDSSIWNYPPNREISRNESPYSMTKPPSSEHFPSPQASSSLHVSIPDSVLTPPGTENTASRKTQFSTSSNS	EDNENSKSDEKGNQSENSEDPESDRKKSGNQSDNEMNCN+DGNSSSNQDSRDSDDSFENSDFENQKAPEDSFGTLGSMQIKVER+VESESDLRLQNCESLTSDSAKDSDSAGEVNAQSSSKHQKRKKRRKKQKGGSMTRRRLSSTSSPNGLDSALVDQPQLLSSPNSASVLKIKTEISEPINFDNDSSIWNYPPNREISRNESPYSMTKPPSSEHFPSPQASSSLHVSIPDSVLTPPGTENTASRKTQFSTSSNS
239772	Query_820	2-contig_11_1	2183	gi|224051538|ref|XP_002200019.1|PREDICTED: hypothetical protein [Taeniopygia guttata]	XP_002200019	737	1	796.964	2057	0	1487	1947	271	730	0	0	452	452	3	462	KRPGSVSSSDQERELKEKQRNAEALAELSESLRNRAEEWASKPKIVRDTLLTLAGCTPYEVRFKKDHALLGRVFAFDAVSKPGMDYELKLFIEYPSGSGTVFSSASGVAKQMYQDCMKDFGRGLSSGFKYLEYEKKHGSGDWRLLGDLLPESVRFFKELVGADMLPQPYLDASCPMLPTALVSLPRPGAGAGGTQGAAAASR-GPGGGGGSGSGAMRKRKASPEPSDSAEGALKLSDEQQRQQWMASQSEALKLT	KRPGSVSSSDQERELKEKQRNAEALAELSESLRNRAEEWASKPKIVRDTLLTLAGCTPYEVRFKKDHALLGRVFAFDAVSKPGMDYELKLFIEYPSGSGTVFSSASGVAKQMYQDCMKDFGRGLSSGFKYLEYEKKHGSGDWRLLGDLLPESVRFFKELVGADMLPQPYLDASCPMLPTALVSLPRPGAGAGGAQGTAAASRGPGGGGGGGGGGAMRKRKASPEPSDSAEGALKLSDEQQRQQWMASQSEALKLT	KRPGSVSSSDQERELKEKQRNAEALAELSESLRNRAEEWASKPKIVRDTLLTLAGCTPYEVRFKKDHALLGRVFAFDAVSKPGMDYELKLFIEYPSGSGTVFSSASGVAKQMYQDCMKDFGRGLSSGFKYLEYEKKHGSGDWRLLGDLLPESVRFFKELVGADMLPQPYLDASCPMLPTALVSLPRPGAGAGG QG AAASR GGGGG G GAMRKRKASPEPSDSAEGALKLSDEQQRQQWMASQSEALKLT
91144	Query_263	11-contig_11346_1	343	gi|224051822|ref|XP_002200627.1|PREDICTED: similar to BTB domain protein 6 [Taeniopygia guttata]	XP_002200627	536	1	711.064	1834	0	1	342	195	536	0	0	341	341	0	342	MYSDEIDLEADTVLATLYAAKKYIVPALAKACVNFLETSLEAKNACVLLSQSRLFEEPELTQRCWEVIDAQAEMALKSEGFCEIDLQTLEIIVTREALNTKEVVVFEAVLNWAEAECKRQGLPVTPRNKRNVLGKALYLVRIPTMTLEEFANGAAQSDILTLEETHNIFLWYTAANKPKLEFPLTKRKGLVPQRCHRFQSSAYRSNQWRYRGRCDSIQFAVDKRIFIAGLGLYGSSCGKAEYSVKIELKRLGVVL	MYSDEIDLEADTVLATLYAAKKYIVPALAKACVNFLETSLEAKNACVLLSQSRLFEEPELTQRCWEVIDAQAEMALKSEGFCEIDQQTLEIIVTREALNTKEVVVFEAVLNWAEAECKRQGLPVTPRNKRNVLGKALYLVRIPTMTLEEFANGAAQSDILTLEETHNIFLWYTAANKPKLEFPLTKRKGLVPQRCHRFQSSAYRSNQWRYRGRCDSIQFAVDKRIFIAGLGLYGSSCGKAEYSVKIELKRLGVVL	MYSDEIDLEADTVLATLYAAKKYIVPALAKACVNFLETSLEAKNACVLLSQSRLFEEPELTQRCWEVIDAQAEMALKSEGFCEID QTLEIIVTREALNTKEVVVFEAVLNWAEAECKRQGLPVTPRNKRNVLGKALYLVRIPTMTLEEFANGAAQSDILTLEETHNIFLWYTAANKPKLEFPLTKRKGLVPQRCHRFQSSAYRSNQWRYRGRCDSIQFAVDKRIFIAGLGLYGSSCGKAEYSVKIELKRLGVVL
385898	Query_368	6-contig_1887_1	1452	gi|224052684|ref|XP_002192446.1|PREDICTED: similar to ligand-dependent corepressor [Taeniopygia guttata]	XP_002192446	1605	1	1044.26	2699	0	32	906	92	976	0	0	591	648	36	898	CWGLPALWHQ-GAWSHLGIHEDAAEAVAIDSNNQPKSPLEKFMVRLCTHHQKQFIRVLNDIYTEVQPDCEGQQSSESESMEASTCGSGCSQQSTENQDKGAVCTDPSPLSSLELGQPGTDS----TGQ----PAELKPTDRAESPSPALRRDFPDPPSTRLRSASPMDSSTQGYLSTLNSSSLNFHHAAKSLEGQ-AAGHEQDTGIRRCEDSKEQGAGKALVEGYISVKVANVNGSEDSLDSCLGSQKSSFRALP	CAGSTSLSHSPGCSSTSGNGEDPAETIAIDSNNQPKSPLEKFMVRLCTHHQKQFIRVLNDIYTEVQPDSDGQQLSESESMEASTCGSGCSQRSTENQDKGATCTESKLPSTLDPGQSGADGPLHVTGQAPKQPVELKSLDRAENSSPALRRDFCELPITRLRSASPKDSPTQGYLSTLNSSSLNFHHAAKSLEGQQAAGHEQEAGIRKCEDNKEQLAGKTLMEGYISVKVANVNGSEDSLDSCLGSQKSSFRALP	C G +L H G S G ED AE +AIDSNNQPKSPLEKFMVRLCTHHQKQFIRVLNDIYTEVQPD +GQQ SESESMEASTCGSGCSQ+STENQDKGA CT+ S+L+ GQ G D TGQ P ELK DRAE+ SPALRRDF + P TRLRSASP DS TQGYLSTLNSSSLNFHHAAKSLEGQ AAGHEQ+ GIR+CED+KEQ AGK L+EGYISVKVANVNGSEDSLDSCLGSQKSSFRALP
27266	Query_349	33-contig_9584_1	2143	gi|224055348|ref|XP_002186802.1|PREDICTED: INO80 complex subunit D [Taeniopygia guttata]	XP_002186802	1029	1	766.533	1978	0	536	912	641	1017	0	0	374	375	0	377	GKNGDLLPTTEEAEELERALQAVTSLECLSTIGVLTQTDGVPVQELSDRGIGVFSTGAGAPGMQSLSREVNTDLGELLNGRIVHDNFSGLELDENLLRSATLSNPPTPLAGQIQGQFSAPANVGLTSATLISQSGLGERAFPGQFHGLHDGSHASQRPHPAQLLSKADDLITSRQQYSSDHSHSSPHGSHYDSEHVPSPYSDHITSPHTTSFSGDNLAATFSAEMPMMAQHLLPTQLDVPLSGVVNPRTHWGNLP	GKNGDLLPTTEEAEELERALQAVTSLECLSTIGVLTQTDGVPVQELSDRAIGVFSTGAGAPGMQSLSREVNTDLGELLNGRIVHDNFSGLELDENLLRSATLSNPPTPLAGQIQGQFSAPANVGLTSATLISQSGLGERAFPGQFHGLHDGSHASQRPHPAQLLSKADDLITSRQQYSSDHSHSSPHGSHYDSEHVPSPYSDHITSPHTTSFSGDNLAATFSAEMPMMAQHLLPTQLDVPLSGVVNPRTHWGNLP	GKNGDLLPTTEEAEELERALQAVTSLECLSTIGVLTQTDGVPVQELSDR IGVFSTGAGAPGMQSLSREVNTDLGELLNGRIVHDNFSGLELDENLLRSATLSNPPTPLAGQIQGQFSAPANVGLTSATLISQSGLGERAFPGQFHGLHDGSHASQRPHPAQLLSKADDLITSRQQYSSDHSHSSPHGSHYDSEHVPSPYSDHITSPHTTSFSGDNLAATFSAEMPMMAQHLLPTQLDVPLSGVVNPRTHWGNLP
128556	Query_141	61-contig_2647_1	504	gi|224058245|ref|XP_002193867.1|PREDICTED: GLIS family zinc finger 1 [Taeniopygia guttata]	XP_002193867	1005	1	675.626	1742	0	77	444	181	537	0	0	329	342	11	368	RSPRFQDSVDSAAPCLNGSHPAQHIKQECPGDYKALSEASTHRRITEGMELRASGSLHPEIDLMNNSFTNSLSSYLFNNEHSSSPSPLSLGTPQHSARLQASNLKKRCISVVPSSAEGIDITAIIRTSQTSLVTCVNGLRTNSAGISSHPVEISHHSAQKSSRPQSCSQPGNPCSIPSPPACLVPISTECDRGDCEQIQMQQVEENGSLSLMMNGTSIPHQNASHSTQKVSFLKQEPADDYSSTTDLFRHHQGLP	RSPRFQDSVDSAAPCLNGSHPAQHIKQECPSDYKVLSEASTHRRITDGMELRASSSLHPELDLMNNSFTNSLSSYLFNNEHSSSLGPLSLGTPQHSARLQTSSLKKRCISVVPSSAEGIDITAIIRTSQTSRVTCVNGLRANSAGISSHPVEISHHSAQKSSQPHSCSQPANPCSIPSPPACLVPLSTECDRGECEQIQMQQVEENGSLSLMMNGTSLPHQNSSHGSQKVSFLKQEPADDYSSTADLFRHHQGLP	RSPRFQDSVDSAAPCLNGSHPAQHIKQECP DYK LSEASTHRRIT+GMELRAS SLHPE+DLMNNSFTNSLSSYLFNNEHSSS PLSLGTPQHSARLQ S+LKKRCISVVPSSAEGIDITAIIRTSQTS VTCVNGLR NSAGISSHPVEISHHSAQKSS+P SCSQP NPCSIPSPPACLVP+STECDRG+CEQIQMQQVEENGSLSLMMNGTS+PHQN+SH +QKVSFLKQEPADDYSST DLFRHHQGLP
149286	Query_527	7-contig_9106_1	1001	gi|224060023|ref|XP_002194595.1|PREDICTED: similar to alpha 4 type IV collagen [Taeniopygia guttata]	XP_002194595	1720	1	924.08	2387	0	124	1000	2	1017	0	0	667	723	165	1029	AFQKKDQDQANNKCNSARPTSVLLQMKQV-----AYIRSCLRENLVKRYLRRRSHILHTREKSAASRRGQPGELGPQGPIGSLGSTGPAGLPGEKGQRGENGQPGPAGEKGDKGPTGVPGFPGLDGVPGLPGSEGPRGKRGIDGCNGSRGDPGFPGENGNIGPRGPYGNPGQKGEKGNSVFVSHFGKGPPGDRGDPGPPGVPGLRGSTGTTGPPGYPGQPGIPGIPGYPGLPGEQ--------------GDVGLP	ALTKDSFERIKWLITAAWWLLIVFSTQGIDGGGYAYIDPCGGQDCSV-----------CRCFPEKGSRGQPGELGAQGPIGSLGSTGPAGLPGEKGQRGENGKPGPAGEKGDKGPTGVPGFPGLDGVPGLPGREGPRGKPGLDGCNGSRGDPGFPGENGYMGPRGPYGIPGQKGEKGNSVYILHFGKGLPGERGDPGPPGMPGPRGSRGTTGPSGYPGHPGLPGIPGYPGLPGEQGNPGIGVDGQKGEPGDIGLP	A K ++ +A ++ + + AYI C ++ R RGQPGELG QGPIGSLGSTGPAGLPGEKGQRGENG+PGPAGEKGDKGPTGVPGFPGLDGVPGLPG EGPRGK G+DGCNGSRGDPGFPGENG +GPRGPYG PGQKGEKGNSV++ HFGKG PG+RGDPGPPG+PG RGS GTTGP GYPG PG+PGIPGYPGLPGEQ GD+GLP
167149	Query_274	1-contig_21611_1	751	gi|224064141|ref|XP_002187786.1|PREDICTED: metastasis suppressor 1-like [Taeniopygia guttata]	XP_002187786	685	1	851.277	2198	0	83	690	128	681	0	0	483	502	112	637	EYKRARHEIKKKSSDTLKLQKKARKGQLGEGLGWGCGGTLAVVSHVLSLSPSLFLPSTTFPQSCWLVGARPWGYRADVTASPAGKGDLQPQLDNALQDVNDMYLLLEETEKQAVRKALIEERGRFCTFITFLQPVVVSPGVPQGFWGPHVTWGGADAVSLVRLQNGELTMLGEITHLQGIIDDLVVLTAEPHKLPPASEQVIKDLKGSDYSWSYQTPPSSPSSSSSRKSSMC----SSVSSAKGGLPWPGGAQTC	EYKRARHEIKKKSSDTLKLQKKARKELLGKG----------------DLQPQL---------------------------------------DNALQDVNDMYLLLEETEKQAVRKALIEERGRFCTFITFLQPVV----------------------------NGELTMLGEITHLQGIIEDLVVLTAEPHKLPPASEQVIKDLKGSDYSWSYQTPPSSPSSSSSRKSSMCSAPPAALAVPKGGMAWPGGAQTC	EYKRARHEIKKKSSDTLKLQKKARK LG+G L P L DNALQDVNDMYLLLEETEKQAVRKALIEERGRFCTFITFLQPVV NGELTMLGEITHLQGII+DLVVLTAEPHKLPPASEQVIKDLKGSDYSWSYQTPPSSPSSSSSRKSSMC ++++ KGG+ WPGGAQTC
271367	Query_893	9-contig_13984_1	1749	gi|224065811|ref|XP_002190221.1|PREDICTED: RNA binding motif protein 15B [Taeniopygia guttata]	XP_002190221	652	1	1189.87	3077	0	980	1628	1	645	0	0	618	626	4	649	LRGGRRSRTPPPAPSPEPLGYLPALHGAYQYKQRSLSPVTSPLLREPRPRHAHAAAAAFALEAAAIGLSRERERALDYYGLYDERGRPYGYPIVAEEDLMPEDDQRATRNLFIGNLDHNVSEVELRRAFEKYGIIEEVVIKRPARGQGGAYAFLKFQNLDMAHRAKVAMSGRVVGRNPIKIGYGKANPTTRLWVGGLGPSTSLAALAREFDRFGSIRTIDYVKGDSFAYIQYESLDAAQAACAQMRGFPLGGPER	MTGHRKTR--PPAPSPEPLGYLPPLHSAYQYKQRSLSPVTSPLLREPRPRHAAAAAFALE--AAAIGLSRERERALDYYGLYDERGRPYSYPIVAEEDLMPEDDQRATRNLFIGNLDHNVSEVELRRAFEKYGIIEEVVIKRPARGQGGAYAFLKFQNLDMAHRAKVAMSGRVVGRNPIKIGYGKANPTTRLWVGGLGPSTSLAALAREFDRFGSIRTIDYVKGDSFAYIQYESLDAAQAACAQMRGFPLGGPER	+ G R++R PPAPSPEPLGYLP LH AYQYKQRSLSPVTSPLLREPRPRHA AAA A AAAIGLSRERERALDYYGLYDERGRPY YPIVAEEDLMPEDDQRATRNLFIGNLDHNVSEVELRRAFEKYGIIEEVVIKRPARGQGGAYAFLKFQNLDMAHRAKVAMSGRVVGRNPIKIGYGKANPTTRLWVGGLGPSTSLAALAREFDRFGSIRTIDYVKGDSFAYIQYESLDAAQAACAQMRGFPLGGPER
17749	Query_1095	1-contig_35992_1	605	gi|224066105|ref|XP_002198012.1|PREDICTED: coatomer protein complex, subunit gamma [Taeniopygia guttata]	XP_002198012	874	1	682.559	1760	0	112	546	313	831	0	0	343	391	84	519	QVAMKHPSAVTACNLDLENLITDSNRSIATLAITTLLKTGSESSVDRLMKQISSFVSEISDEFKVVVVQAISALCQKYPRKHSVMMTFLSNMLRDDGGFEYKRAIVDCIISIIEENPESKESGLAHLCEFIEDCEHTVLATKILHL------------------------------------LGKEGPRTPSPSKYIRFIFNRVVLENE-------------------AVRAG-----LTVSVPGMEKALHQYTL	KVAMKHPSAVTACNLDLENLVTDSNRSIATLAITTLLKTGSESSIDRLMKQISSFMSEISDEFKVVVVQAINALCQKYPRKHAVLMNFLFTMLREEGGFEYKRAIVDCIISIIEENSESKETGLSHLCEFIEDCEFTVLATRILHLLGQEGPKTNNPSKYIRFIYNRVVLEHEEVRAGAVSALAKFGAQNEEMLPSILVLLRRCVMDDDNEVRDRATFYLNVLEQKQKALNAGYILNGLTVSIPGLERALHQYTL	+VAMKHPSAVTACNLDLENL+TDSNRSIATLAITTLLKTGSESS+DRLMKQISSF+SEISDEFKVVVVQAI+ALCQKYPRKH+V+M FL MLR++GGFEYKRAIVDCIISIIEEN ESKE+GL+HLCEFIEDCE TVLAT+ILHL L K G + I + R V++++ A+ AG LTVS+PG+E+ALHQYTL
153811	Query_868	3-contig_18996_1	758	gi|224067505|ref|XP_002193874.1|PREDICTED: similar to Uncharacterized protein KIAA1931 [Taeniopygia guttata]	XP_002193874	851	1	1124.38	2907	0	2	757	103	851	0	0	654	677	11	758	LNVSLSHTSCKSQSCGGGSHSSSSSTSSSSSSCHGNSGDWDPSSFLSAHKLSGLWNSQHTNGATQGSPLGAPTAALGEAFHSSEHHQHSDLTAPPNSPTGLPSQPPALVPSKQTPAHPGPFGSPPHVPLGSTPQAALFPTPSVQAAAPKPASESPSAGTVSHGPGSCKSPHLPPANVPLLKMPPPLSGCTHPCNGHCSTSLIPPPASHQLPGTNRDPSCKGHKFPNGTSCHPPQPCEADEGLGEDEDSSSERSSC	LAVSLSHTSCKSQSCGGGSHSSSSSSSSSSSSCHGNSGDWDPSSFLSAHKLSGLWNSQHTNGTVQGSPLGTPPAALGEAFHSSEHHQHSDLTAPPNSPTGLPSQPPALIPSKQTPPHPGPFSSPPHIPLGSSSQAALFPAPSAQAAAPKPLSESPPASAASHSPGPCKSPHLPPANVPLLKMPPPLSGCAHPCNGHCSTSLIPPPASHQLPSTNRDPSCKGHKFPNGTSCHPPQPCEADEGLGEDEDSSSERSSC	L VSLSHTSCKSQSCGGGSHSSSSS+SSSSSSCHGNSGDWDPSSFLSAHKLSGLWNSQHTNG QGSPLG P AALGEAFHSSEHHQHSDLTAPPNSPTGLPSQPPAL+PSKQTP HPGPF SPPH+PLGS+ QAALFP PS QAAAPKP SESP A SH PG CKSPHLPPANVPLLKMPPPLSGC HPCNGHCSTSLIPPPASHQLP TNRDPSCKGHKFPNGTSCHPPQPCEADEGLGEDEDSSSERSSC
193480	Query_87	1-contig_24083_1	2077	gi|224078484|ref|XP_002195342.1|PREDICTED: similar to hCG1642754 [Taeniopygia guttata]	XP_002195342	1689	1	1751.49	4535	0	43	1479	25	1450	0	0	938	1098	37	1450	SQSSVIPPQEQALSQPVYLKALTIPLYQPVQPGCFQPSSQLVTGRSCGNLDSSNIPLILNPLVPSEGTDQPQSVFQKQLGQTLTLNIVSTLPVLSSPNSSVNAPTGSPGKSKNAGKYICKHCGRDCLKPSVLEKHIRSHTGERPFPCTTCGIAFKTQSNLYKHRRTQTHVNNTKLPSDSDNAGVPEQNEKATESITSQQGTKGHGSICEDRGIQKKQGTLDISAVTDSKKLNDPSVPATSNSSIVSENKETP-QS	SRGSSEPARGPALPQPLYLKALTFPLLQPVQPGCFQPHGPLVAGRSCIHLDGSNVPLILNPLVPPEGTEQPQPLFHKQLGQSLTLSIVSALPVLSSPSSCVKASIGNLGKSKKSGKYICKHCGRDCLKPSVLEKHIRSHTGERPFPCTTCGIAFKTQSNLYKHRRTQTHVNNTRLPSDSDISGGPEQNERSAESTTCPQGSKILSSTSEDQGTHIKQPSSETSAATDTKKPHELSLPATSSSSAASENQETTNQS	S+ S P + AL QP+YLKALT PL QPVQPGCFQP LV GRSC +LD SN+PLILNPLVP EGT+QPQ +F KQLGQ+LTL+IVS LPVLSSP+S V A G+ GKSK +GKYICKHCGRDCLKPSVLEKHIRSHTGERPFPCTTCGIAFKTQSNLYKHRRTQTHVNNT+LPSDSD +G PEQNE++ ES T QG+K S ED+G KQ + + SA TD+KK ++ S+PATS+SS SEN+ET QS
132560	Query_819	7-contig_9697_1	577	gi|224080450|ref|XP_002190370.1|PREDICTED: von Willebrand factor A domain containing 5B1 [Taeniopygia guttata]	XP_002190370	1351	1	636.336	1640	0	1	529	273	885	0	0	350	411	90	616	MPHILIEEGDMTPAEYEQHLKGKNDFIKGTKKDPSAEKKTEIIRKRLHKDIPHHPVVMLNFCPELSAAPADLRDAPREFIFLVDCS--GSSTSISRAKDALLVALKSLMPTCLFNIITFSSTFKSLFPSSRTYCEESLATACESIRRMCADAGSPNILSPLKWIVRQPIHRGHPRLLFLLTHGAADSTGTVLELLRSHSCSTRCYSFGVGPHACSRLVQGVAAVSRGIAEFLAEGERLQPKLIRSLKKAMAPVLS	MPHVLMEEGDMTPAEYERHLKGKNDFIKGTKKDPSAKKKMEIIRKRLNKDIPHHPVIMLNFCPDLRAVQPGLRKAQGEFIFLVDRSRSMSGVNISHAKDALLVILKSLMPACLFNVIGFGSTFKTLFPVSQAYCEESLLMACQSIRRIRADMGSINLLSPLKWVTRQPLHRGHPRLLFLLTGGAISNTGKVLELLRTTPCSTRCYSFGIGPNACRRLVRGLAAVSRGVSEFLAEGERLQPKMIRSLKKAMAPVLS	MPH+L+EEGDMTPAEYE+HLKGKNDFIKGTKKDPSA+KK EIIRKRL+KDIPHHPV+MLNFCP+L A LR A EFIFLVD S S +IS AKDALLV LKSLMP CLFN+I F STFK+LFP S+ YCEESL AC+SIRR+ AD GS N+LSPLKW+ RQP+HRGHPRLLFLLT GA +TG VLELLR+ CSTRCYSFG+GP+AC RLV+G+AAVSRG++EFLAEGERLQPK+IRSLKKAMAPVLS
326074	Query_135	4-contig_44226_1	755	gi|224080466|ref|XP_002190594.1|PREDICTED: DnaJ (Hsp40) homolog, subfamily C, member 16 [Taeniopygia guttata]	XP_002190594	753	1	909.057	2348	0	202	754	53	753	0	0	485	513	148	701	QILSNEEKRANFDRYGDAGEGQGYSQHQQHQFHHFHEGFYFDESFFHFPFNSERRDTSDEKYLLHFSHYVNEIVPDSFKKPYLIKITSDWCFSCIHIEPVWKEVAQELEALGAGIGVVHAGYERRLAHHLGAHSTPSILGLINGKITFFHNSITRENLRQFVENLLPGSLVE-----------------------------------KLTAFAYRDYLSFGYVYVGLRGTEELSSQYNINVYTPTLMVFKEHIDK	EILSNEEKRANFDRYGDAGESQGFSQQQHRQFHRFHDGFYFDESFFHFPFNSERRDTSDEKYLLHFSHYINEIVPDSFKKPYLIKITSDWCFSCIHIEPVWKEVAQELEALGAGIGVVHAGYERRLAHHLGAHSTPTLLGLINGKITFFHNAVVRENLRQFVENLLPGNLVEKITDKNYIRFLSHWRKDNKPHVLLFDHMPVVPLLYKLTAFAYRDYLSFGYVYVGLRGTEELSSQYNINVYTPTMMIFKEHIDR	+ILSNEEKRANFDRYGDAGE QG+SQ Q QFH FH+GFYFDESFFHFPFNSERRDTSDEKYLLHFSHY+NEIVPDSFKKPYLIKITSDWCFSCIHIEPVWKEVAQELEALGAGIGVVHAGYERRLAHHLGAHSTP++LGLINGKITFFHN++ RENLRQFVENLLPG+LVE KLTAFAYRDYLSFGYVYVGLRGTEELSSQYNINVYTPT+M+FKEHID+
49137	Query_1022	1-contig_32102_1	936	gi|224082066|ref|XP_002195688.1|PREDICTED: claspin homolog (Xenopus laevis) [Taeniopygia guttata]	XP_002195688	1329	1	767.689	1981	0	80	743	82	808	0	0	478	544	77	734	RDSEEEIFVSRKAKGKKVLQDSESEDDGGDS--PVQSDALGGDTENGEEKEKVTAQRNKKSRIRQGLLDSDDSDTGDCLQSEKLDPRRKSVLSENELEEERPLKSGKKSRKDKHNLG--DKAAEKAAGKPRRKERERRAESIKQLIKEKKPSSEGTQVDGGQRYPFNDSGCLLDDKDLFDNGLEEENDSFPGDEESIESIRAAVKEKVKKHKERKAARLSKEAIKQLHSETQRLIRDG-----------------	RDSEEEIFVRKKAKNQKVLQDSESEEEEEDGGSPVQEDALGGDKENGEEKENIATEKKKSHRVRPALLDTDDSDTGDLLQIENLETGGTSGLPEGELERERSLKPGKKYRKHKHKLSIEEEPAKQAVAKPRRR-KEKIMESLKQLRKEKKP-----QVDGGERLPFNDSGCLLDDKDLFDNGLEEESDQPLEDEESLESIRAAVKKKIKQYKERKAARLSKEAIKQLHSETQRLIRESSVSLPYHVPEAKSVHDF	RDSEEEIFV +KAK +KVLQDSESE++ D PVQ DALGGD ENGEEKE + ++ K R+R LLD+DDSDTGD LQ E L+ S L E ELE ER LK GKK RK KH L ++ A++A KPRR+ +E+ ES+KQL KEKKP QVDGG+R PFNDSGCLLDDKDLFDNGLEEE+D DEES+ESIRAAVK+K+K++KERKAARLSKEAIKQLHSETQRLIR+
83423	Query_1020	3-contig_14197_1	416	gi|224084842|ref|XP_002194977.1|PREDICTED: similar to rCG28567 [Taeniopygia guttata]	XP_002194977	433	1	637.491	1643	0	2	410	20	423	0	0	350	366	7	410	PPNGTADGKPKDVASKSVGLFFMLLIDLAAIVGNAAVMTVIVKTPALRKFVFVFHLCLVDFLAALTLMPLEMLSGSAVFDSPVLGEAMCRVYLFLSVCFISMCILSISTINVERYYYVVHPMRYEVRMTVGLVACVLVGVWLKAVATSLVPVLGWLSPERPPPAG-RGCSLQWSRGPYCKFFVVFFATFYFLLPLLIIVVVYCSMFKVARVAAMHHGPLPTWMETPRRRSESLSSRSTMVTTSGAPRTTPQRTFG	PPNSTAEAKPKDVASKSVGLFFMVLLDLTAIVGNAAVMTVIAKTPALRKFVFVFHLCLVDFLAALTLMPLEMLSGSAVFESPGLGEAVCRVYLFLSVCLTSMCILSISTINVERYYYVVHPLRYEVRMTAGLVAGVLAGVWLKAVATSLVPVLGWLSPDRPPTSGTRGCSLQWSRGPSCKVFVVFFAAFYFVLPLLIILVVYCGMFKVARVAAMHHGPPPTWMETPRRRSASLSSRSTMVTTSGAPRTTPQRIFG	PPN TA+ KPKDVASKSVGLFFM+L+DL AIVGNAAVMTVI KTPALRKFVFVFHLCLVDFLAALTLMPLEMLSGSAVF+SP LGEA+CRVYLFLSVC SMCILSISTINVERYYYVVHP+RYEVRMT GLVA VL GVWLKAVATSLVPVLGWLSP+RPP +G RGCSLQWSRGP CK FVVFFA FYF+LPLLII+VVYC MFKVARVAAMHHGP PTWMETPRRRS SLSSRSTMVTTSGAPRTTPQR FG
224342	Query_301	2-contig_3587_1	492	gi|224084946|ref|XP_002195469.1|PREDICTED: similar to kelch-like 12 (Drosophila) [Taeniopygia guttata]	XP_002195469	661	1	726.857	1875	0	33	491	1	479	0	0	382	397	76	507	MNALRKSGTLCDVTLRVEHKDFPAHRIVLAACSDYFCAMFTSELSEKDKPYVDIQGLTASTMEILLDFVYTETVHVTVENVQELLPAACLLQLKGVKQACCEFLESQLDPSNCLGIRDFAETHNCVDLMQAAEVFSQKHFPEVVQHEEFILLNQEEVEKLIKCDEIQVKPGSTITAPSVGSSHGAFPSGECSSQEVDSEEPVFEAVINWVKHSKKEREASLPELLQYVRMPLLTPRYITDVIDTESITR------	MNALRKSNTFCDVTIRVEHKDFPAHRIVLAACSDYFCAMFTSELSEKDKPCVDIQGLTASTMEILLDFVYTETVHVTVENVQELLPAACLLQLKGVKQACCEFLESQLDPSNCLGIRDFAETHNCVDLMQAAEVFSQKHFPEVVQHEEFILLNQEEVEKLIKCDEIQV----------------------------DSEEPVFEAVINWVKHSKKEREASLPELLQYVRMPLLTPRYITDVIDTEPFIRCSLQCR	MNALRKS T CDVT+RVEHKDFPAHRIVLAACSDYFCAMFTSELSEKDKP VDIQGLTASTMEILLDFVYTETVHVTVENVQELLPAACLLQLKGVKQACCEFLESQLDPSNCLGIRDFAETHNCVDLMQAAEVFSQKHFPEVVQHEEFILLNQEEVEKLIKCDEIQV DSEEPVFEAVINWVKHSKKEREASLPELLQYVRMPLLTPRYITDVIDTE R
185205	Query_537	2-contig_43260_1	6056	gi|224085045|ref|XP_002196098.1|PREDICTED: hypothetical protein, partial [Taeniopygia guttata]	XP_002196098	2461	1	1506.12	3898	0	4045	4937	363	1313	0	0	773	818	58	951	RSPNAAPQFQPPSYQAAVPENRPAGTAVARVTATDPDSGEAGRLRYAMAALFDSRSDALFSIDPDSGAVSTAAPLDRESKSTHAFRVTAVDHGTPRRSAMATLTVTVSDANDHEPTFEQHEYRESVRENLEVGYEVLTVRATDGDAGPNANVLYRLLNAGGPNEVFEIDPRSGVIRTRGPVDREAVEAFELLVEAADQGQEPGPRSSTATVRIAVEDDNDNAPQFSEQRYVAEVPEDALPNTAVLRVTATDRDKG	RSPNTAPQFQPSSYQATVEENQPARTPVTQVTAQDPDEGEAGRLHYSMAALFDSRSNDLFTVDPVTGAISTAAPLDRESKSTHVFRVIAVDHGTPRRSAMATLTVTVSDTNDHDPAFEQLEYRESVRENLEVGYEVLTVRATDGDAGPNANILYRLLNAGDANEVFEIDSRSGVIRTRGPVDREVVDTFELLVEATDQGQDPGPRSATATVRIAVEDDNDNAPQFSERRYVAQVPEDVVPNVAVLQVMATDRDKG	RSPN APQFQP SYQA V EN+PA T V +VTA DPD GEAGRL Y+MAALFDSRS+ LF++DP +GA+STAAPLDRESKSTH FRV AVDHGTPRRSAMATLTVTVSD NDH+P FEQ EYRESVRENLEVGYEVLTVRATDGDAGPNAN+LYRLLNAG NEVFEID RSGVIRTRGPVDRE V+ FELLVEA DQGQ+PGPRS+TATVRIAVEDDNDNAPQFSE+RYVA+VPED +PN AVL+V ATDRDKG
110231	Query_344	3-contig_4501_1	1645	gi|224087653|ref|XP_002193573.1|PREDICTED: similar to PALM [Taeniopygia guttata]	XP_002193573	1033	1	640.958	1652	0	96	681	280	901	0	0	364	443	52	630	GDASADGDDDIFGPSQYSSQK-ENGYEQKIRLKSPSYFLESGKDVWSPAPDRESHLEVVRSGNLYDLRAYRGERKPSKLYEDDEPDPYRLQPPNISPEKAKELEDKRREVIRGQVVRKSSTMAEKWSSMDELSSIA---GGQGHG-----APGSFAIYFDKASPGRAVTPVDPESIDREQINFSAARQQFLMLERSSPGALFSPG-YAMSPRPEVGSRTSRQEWHSPDTVTKVERGRGDTTGPRQGGMEQNIYTV	ADLRASSDDDVFGSAEHSTQRVENGYSWKRRSQSPSYFLEGGRDVWTPSPDRESKLEVVRSGSLYDLRAYKGERKPSKLYDDEEQDLYRVPPPNITPEKARELEDERKEVIRSQVMRKSSTIAERWSSMDELGSISMGVGSQGEGRHTGSVPTSFAIWFDKPSPGRAGTPIDPESIDTEQINFSAARQQFLMLEKTSPGSFFSPGQQAMSPRPESVTKVSREEWYSPDLATKGTRGYSSAGASSQSRTDKSVYKI	D A DDD+FG +++S+Q+ ENGY K R +SPSYFLE G+DVW+P+PDRES LEVVRSG+LYDLRAY+GERKPSKLY+D+E D YR+ PPNI+PEKA+ELED+R+EVIR QV+RKSST+AE+WSSMDEL SI+ G QG G P SFAI+FDK SPGRA TP+DPESID EQINFSAARQQFLMLE++SPG+ FSPG AMSPRPE ++ SR+EW+SPD TK RG Q ++++Y +
158392	Query_318	90-contig_16888_1	1818	gi|224089456|ref|XP_002189234.1|PREDICTED: similar to RING-finger protein [Taeniopygia guttata]	XP_002189234	991	1	837.795	2163	0	766	1306	2	540	0	0	429	475	16	548	SAAKEYSEDSSFLPKASNSKLHQTMPTDASPDSKCPICLDKFDNVAYLDRCLHRFCFRCVQEWSKNKAECPLCKQPFFSIFHTVRAEDDFKEYILRPSENGSFASPDGRRFRYRTTLTRERRTSSYHRASSSSRRTLSPPDNGILFEGLSSQPVRQRDGEIQQMIRRLASRRQASAEGRYLRQIQEEDMINFRRALYRTGVRVRSVQDGGRYRDISAEFFRHNPACLHRLVPWLKRELTVLFGAHGSLVNIVQHI	TSDKEFAENSNFSPKASTSKL----PTDASPDSKCPICLDRFDNVAYLDRCLHRFCFCCVQEWSKNKAECPLCKQPFFSIFHTIRAEDDFKEYILSPLETSSFASPDGRRFRYRTTLTRERRMRG-----SPSQRMLSPLDNGMLFEGLSSEPTRHRHREIQQMIRRLASRRKASAEGRSLRQIQEEDMISFRRALYRTGVRIRSIQDGGRYREISAEFFRHNPACLHRLVPWLKRELTVLFGAHGSLINIVQHI	++ KE++E+S+F PKAS SKL PTDASPDSKCPICLD+FDNVAYLDRCLHRFCF CVQEWSKNKAECPLCKQPFFSIFHT+RAEDDFKEYIL P E SFASPDGRRFRYRTTLTRERR S S+R LSP DNG+LFEGLSS+P R R EIQQMIRRLASRR+ASAEGR LRQIQEEDMI+FRRALYRTGVR+RS+QDGGRYR+ISAEFFRHNPACLHRLVPWLKRELTVLFGAHGSL+NIVQHI
256634	Query_165	17-contig_15754_1	505	gi|224093610|ref|XP_002194704.1|PREDICTED: transmembrane protein 168 [Taeniopygia guttata]	XP_002194704	700	1	710.294	1832	0	27	405	1	379	0	0	366	376	0	379	MCRSLRYCISHCLYAAMTRLEEANREVNMHSSVRYLGYLARINLLVAICMGLYVRWEKTADTLILVIFILGLFVLGIASILYYYFSMETASLSLSNLWFGFLLGLLCFLNNSAFKNDVKEEATKYLLLSAIVLRVLCSLVERICGCIHHRPTLLTTVEFLELVGFAIASTTMLVEKSMSIILLVMALAMLIIDLRMKSFLAIPNLAIFGAIASLLFFPSLQIPTNPFALACFFSCLISDPLLDVYFSGLSVTERW	MCRSLRYCVSHCLYAAMTRLEEANREVNMHSSVRYLGYLARINLLVAICMGLYVRWEKTADTLILVIFILGLFVLGIASILYYYFSMETASLSLSNLWFGFLLGLLCFLNNSAFKMDVKEEATKYLLLSAIVLRILCALVERICGCVHHRPTLLTTVEFLELVGFAIASTTMLVEKSLSIILLVLALAMLIIDLRMKSFLAIPNLAIFGAITSLLFFPSLQIPTNPFALACFFSCLISDPLLDVYFSGLSVTERW	MCRSLRYC+SHCLYAAMTRLEEANREVNMHSSVRYLGYLARINLLVAICMGLYVRWEKTADTLILVIFILGLFVLGIASILYYYFSMETASLSLSNLWFGFLLGLLCFLNNSAFK DVKEEATKYLLLSAIVLR+LC+LVERICGC+HHRPTLLTTVEFLELVGFAIASTTMLVEKS+SIILLV+ALAMLIIDLRMKSFLAIPNLAIFGAI SLLFFPSLQIPTNPFALACFFSCLISDPLLDVYFSGLSVTERW
284288	Query_939	2-contig_17610_1	469	gi|224094446|ref|XP_002190069.1|PREDICTED: hypothetical protein [Taeniopygia guttata]	XP_002190069	511	1	704.131	1816	0	1	468	20	511	0	0	353	408	24	492	MAEFEQEVSSLRNTMREIENNEQTLFIKMQGIKEKLQNITSSWRRSVDGMNTNTGGIKSEAKFIHAEVTSQINEVDQRIKSLTERLKDLEGSTARNIRTVKRQEDDEFARVEQKLDSQAMAIEKLEGEQNGLFAKNTDLRHKLAAYEPKIEECKSHLPKIENAIHSILRLSSELLSMEKKIESLAAQLYAVESNMLKTVSDTVAMQNVLEGAQYNDS------------------------CEKTLNLMEQLEHL	MTEFGQEISSLHNTINDIQNNEQTLSLKMQSINEKFQNVTNSWRRSLDEMNTNASGLKSEAKFIHTEVTSKINEVDQRIKSLAERVRDLEDSTARNIRTLKKQEDDEFSRVEQKLNLDAKSVEKIEEEQNSLVAKDTDLNQKLANYEPKIEECKSHLPTIENAIHSILRLSSDLLGMEKKIEDLKTQLYAVENDMLKTVSDTVVIQKALEGLQSNGSLFKVQHELAVLEAGPDIAVSSKAECEKTWNLMKQLEDL	M EF QE+SSL NT+ +I+NNEQTL +KMQ I EK QN+T+SWRRS+D MNTN G+KSEAKFIH EVTS+INEVDQRIKSL ER++DLE STARNIRT+K+QEDDEF+RVEQKL+ A ++EK+E EQN L AK+TDL KLA YEPKIEECKSHLP IENAIHSILRLSS+LL MEKKIE L QLYAVE++MLKTVSDTV +Q LEG Q N S CEKT NLM+QLE L
84171	Query_465	4-contig_8727_1	601	gi|224095383|ref|XP_002196607.1|PREDICTED: similar to winged-helix transcription factor RFX4 [Taeniopygia guttata]	XP_002196607	747	1	759.214	1959	0	43	478	128	611	0	0	391	402	76	498	TRRFA--GERLYHYYGIAVKENSQYYDVMYSKKGAAWVNETGKKEVTKQTVAYSPRSKLGTLLPEFPNVKDLNLPASLPEEKVSTFIMMYRTHCQRILDTVIRANFDEVQSFLLHFWQGMPPHMLPVLGSSTVVNIVGVCDSILYKAISGVLMPTVLQALPDSLTQVIRKFAKQLDEWLKVALHDLPENLRNIKFEYWIGL--------------QASRTVIHSADITFQMLEDWRNVDLNSITKQTLYTMEDSR	TRRLGTRGQSKYHYYGIAVKENSQYYDVMYSKKGAAWVNETGKKEVTKQTVAYSPRSKLGTLLPEFPNVKDLNLPASLPEEKVSTFIMMYRTHCQRILDTVIRANFDEVQSFLLHFWQGMPPHMLPVLGSSTVVNIVGVCDSILYKAISGVLMPTVLQALPDSLTQVIRKFAKQLDEWLKVALHDLPENLRNIKFELSRRFSQILRRQTSLNHLCQASRTVIHSADITFQMLEDWRNVDLNSITKQTLYTMEDSR	TRR G+ YHYYGIAVKENSQYYDVMYSKKGAAWVNETGKKEVTKQTVAYSPRSKLGTLLPEFPNVKDLNLPASLPEEKVSTFIMMYRTHCQRILDTVIRANFDEVQSFLLHFWQGMPPHMLPVLGSSTVVNIVGVCDSILYKAISGVLMPTVLQALPDSLTQVIRKFAKQLDEWLKVALHDLPENLRNIKFE QASRTVIHSADITFQMLEDWRNVDLNSITKQTLYTMEDSR
64200	Query_850	4-contig_27304_1	944	gi|224095593|ref|XP_002197636.1|PREDICTED: similar to KIAA1277 protein [Taeniopygia guttata]	XP_002197636	1102	1	1470.29	3805	0	1	864	2	875	0	0	768	804	42	890	MTASKAADVSSRSESSVCKSAERSKLADRSSTAAVTELGRLLCGFSRERCSEGASVTLSLTPEADPISCVVKNPLGALENLMLDPRLDCFQQNMLSPKMIISDPSVDLNVKENSRIIRRQIGGTQNTRTPGKIGLRNKSFSIKDKISEWEGKKEMQSAPRREEEQGCKEEHKIPFVVEKTSREALMSRKVETRRLLNWELECKGAGKENERKTGTPKGTGQGAERKGETEKDEEVQSSLGKCKEVKGGKWEVQKE	MTGSKAADVSSKSGGAVCKSGERIKLADKNNTAAVKKVEKSLCGFLSEKCSKGSSVALGLTPEAAPVSSVVKNPLGALENLMLDPRLDCFQQNMLNPKMIISDPSVDLNVKENNKIIRRQIGGTQNIWSPGKIGLRNKSFSIKDKISEWEGKKETQSAPRREEEPGVKEEHRMPCVTEKMSGEALVTRKAETKRLQSWELECKGAGKENERKAGTQKGTGQAAERKGEVQKDEEMEFSPGKCKEVKGGKWDVQKE	MT SKAADVSS+S +VCKS ER KLAD+++TAAV ++ + LCGF E+CS+G+SV L LTPEA P+S VVKNPLGALENLMLDPRLDCFQQNML+PKMIISDPSVDLNVKEN++IIRRQIGGTQN +PGKIGLRNKSFSIKDKISEWEGKKE QSAPRREEE G KEEH++P V EK S EAL++RK ET+RL +WELECKGAGKENERK GT KGTGQ AERKGE +KDEE++ S GKCKEVKGGKW+VQKE
231830	Query_643	29-contig_16300_1	738	gi|226823206|ref|NP_001152819.1|neuron navigator 3 [Gallus gallus]	NP_001152819	2337	1	644.425	1661	0	61	402	291	633	0	0	329	336	1	343	DSPKGPHPSAGMNGNVQHPTSTGQQQVSAIPSPSASKPWRSKSMNVKHSATSTMLSVKQPSPATSPTPSSDRLKPPPSEGVKPPSSGQKSMLEKFKLVNARTALRPPLSLSSGPSDSGREDDTFSECGEMDVLSGGVNSGGSTSSSPKVSPKLTPPKAGSKNLSNKKSLLQPKDKEEKNRDK-KVCTEKTVKEEKDQVTETSTKKSSKIASLIPKGSKTSTAKKESLIPSSSGIPKPGSKVPTAKQSASSACAGS	DSPKGPQPSAGMNGNVQHPTSTGQQQVSAIPSPSASKPWRSKSMNVKHSATSTMLSVKQPSPATSPTPSSDRLKPPPSEGVKPPSSGQKSMLEKFKLVNARTALRPPLSLSSGPSDSGREDDTFSECGEVDVLSGGVNSGGSTSSSPKVSPKLTPPKAGSKNLSNKKSLLQPKDKEEKNRDKNKVCTEKTVKEEKDQVTETSTKKSSKIASLIPKGSKTATAKKESLIPSSSGIPKPGSKVPTAKQNASSACAGS	DSPKGP PSAGMNGNVQHPTSTGQQQVSAIPSPSASKPWRSKSMNVKHSATSTMLSVKQPSPATSPTPSSDRLKPPPSEGVKPPSSGQKSMLEKFKLVNARTALRPPLSLSSGPSDSGREDDTFSECGE+DVLSGGVNSGGSTSSSPKVSPKLTPPKAGSKNLSNKKSLLQPKDKEEKNRDK KVCTEKTVKEEKDQVTETSTKKSSKIASLIPKGSKT+TAKKESLIPSSSGIPKPGSKVPTAKQ+ASSACAGS
273763	Query_146	1-contig_5379_1	1253	gi|2351083|dbj|BAA22057.1|BMP type II receptor [Gallus gallus]	BAA22057	1031	1	1728.76	4476	0	218	1133	133	1021	0	0	880	882	29	917	NSSHSFHRDETIVIALASVSVLAVLIAALFFGYRMLAGDRKQGLHSMNMMEAAASEPSLDLDNLKLLELIGRGRYGAVYKGSLDERPVAVKVFSFANRQNFVNERNIYRIPLMEHDNIARFIVGDERFTADGRMEYLLVMEYYPNCTLAHCYSEPSLGFFVSKTELITVGEMPGSLCKYLSLHTSDWVSSCRLAHSITRGLAYLHTELPRGDHYKPAISHRDLNSRNVLVKNDGTCVISDFGLSMKLTGNRLVRP	NSSHSFHRDETIVIVLASVSVLAVLIAALFFGYRMLAGDRKQGLHSMNMMEAAASEPSLDLDNLKLLELIGRGRYGAVYKGSLDERPVAVKVFSFANRQNFVNERNIYRIPLMEHDNIARFIVGDERFTADGRMEYLLVMEYYPN----------------------------GSLCKYLSLHTSDWVSSCRLAHSITRGLAYLHTELPRGDHYKPAISHRDLNSRNVLVKNDGTCVISDFGLSMKLTGNRLVRP	NSSHSFHRDETIVI LASVSVLAVLIAALFFGYRMLAGDRKQGLHSMNMMEAAASEPSLDLDNLKLLELIGRGRYGAVYKGSLDERPVAVKVFSFANRQNFVNERNIYRIPLMEHDNIARFIVGDERFTADGRMEYLLVMEYYPN GSLCKYLSLHTSDWVSSCRLAHSITRGLAYLHTELPRGDHYKPAISHRDLNSRNVLVKNDGTCVISDFGLSMKLTGNRLVRP
296880	Query_1024	5-contig_8907_1	624	gi|237858648|ref|NP_001153795.1|neurofascin isoform 7 precursor [Gallus gallus]	NP_001153795	1179	1	1013.06	2618	0	16	514	532	1030	0	0	484	492	0	499	DPTRIVRGPEDQVVKRGSVSRLHCRVKHDPTLKLTVTWLKDDTPLYSGSRVKKEDDGLTIYGVTEKDQGDYTCVASTELDKDSAKAYLTVLERPDRPRDLELSDLAERSVKLTWIPGDDNNSPITDYIVQFEEDRFQPGTWHNHSRYPGNVNSAVLRLSPYVNYQFRVIAVNDVGSSLPSVPSERYQTSGARPEINPTGVQGAGTQKNNMEITWTPLNATQAYGPNLRYIVRWRRRDPRGSWYNETVKAPRHVVW	DPTRIVRGPEDQVVKRGSMPRLHCRVKHDPTLKLTVTWLKDDAPLYIGNRMKKEDDGLTIYGVAEKDQGDYTCVASTELDKDSAKAYLTVLERPDRPRDLELSDLAERSVKLTWIPGDDNNSPITDYIVQFEEDRFQPGTWHNHSRYPGNVNSALLSLSPYVNYQFRVIAVNDVGSSLPSMPSERYQTSGARPEINPTGVQGAGTQKNNMEITWTPLNATQAYGPNLRYIVRWRRRDPRGSWYNETVKAPRHVVW	DPTRIVRGPEDQVVKRGS+ RLHCRVKHDPTLKLTVTWLKDD PLY G+R+KKEDDGLTIYGV EKDQGDYTCVASTELDKDSAKAYLTVLERPDRPRDLELSDLAERSVKLTWIPGDDNNSPITDYIVQFEEDRFQPGTWHNHSRYPGNVNSA+L LSPYVNYQFRVIAVNDVGSSLPS+PSERYQTSGARPEINPTGVQGAGTQKNNMEITWTPLNATQAYGPNLRYIVRWRRRDPRGSWYNETVKAPRHVVW
30518	Query_558	83-contig_1540_1	1038	gi|237871653|gb|ACR26270.1|TLR5 [Gallus lafayetii]	ACR26270	861	1	1574.3	4075	0	79	905	1	827	0	0	758	795	0	827	MMLHHQLIIVFGISLAGDTCASRSCYSEAQVSMYNSCNLTGVPPVPKDTAKLFLTHNYIRRVTATSFPLLEDLFLLELGTQHVFPLHIGKEAFRNLPNLRVLDLGFNSILLLDLDSFVGLRRLTILRLFQNSLGDSILEERYFQDLSSLEELDLSGNQITKLNPHPLFYNLTILKAVDLKFNKISNLCASNLTSFQGKHFSFFSLRSNTLYKMDEMVWAKCPNPFRNITFNTLDVSDNGWSTETVQYFCTAINGT	MMLHQRLIIVFGIALAGDICASRSCYSEDQVSMYNSCNLTGVPPVPKDTAKLFLTYNYIRRVTATSFPLLEDLFLLEIGTQHIFPLYIGKEAFRNLPNLRVLDLGFNNILLLDLDSFAGLQRLTILRLFQNNLGDSILEERYFQDLRSLEELDLSGNQITKLHPHPLFYNLTILKAVDLKFNKISNLCESNLTSFQGKHFSFFSLSTNTLYKTDKMVWAKCPNPFRNITFNSLDVSENGWSTETVQYFCTAIKGT	MMLH +LIIVFGI+LAGD CASRSCYSE QVSMYNSCNLTGVPPVPKDTAKLFLT+NYIRRVTATSFPLLEDLFLLE+GTQH+FPL+IGKEAFRNLPNLRVLDLGFN+ILLLDLDSF GL+RLTILRLFQN+LGDSILEERYFQDL SLEELDLSGNQITKL+PHPLFYNLTILKAVDLKFNKISNLC SNLTSFQGKHFSFFSL +NTLYK D+MVWAKCPNPFRNITFN+LDVS+NGWSTETVQYFCTAI GT
135069	Query_1078	17-contig_12815_1	1465	gi|237871686|gb|ACR26286.1|TLR4 [Gallus gallus]	ACR26286	843	1	1188.33	3073	0	486	1136	89	739	0	0	591	618	0	651	LNRCHIHTIEDNSFADLHNLSTLILTANSLQHLGLAAFYGLTSLKKLVLVETSISSLSDLPIGHLNTLQELNLGHNNIASLKLPKYFASLTSLRYLSFSSNNITYISKGDLDALRETNRINLTLVLSLNNIKCIQSGSFAKIHLGELVLRSSFEDPNLMHSSLHGLAGLQVNRLIVGEFTNILKITEFQNELLSGLCQVQMQEFVLMCFREFENNTDTLFNCIDNVSSIRLVDLNLETLSEVPKFSQVKNLEWKK	LSRCHIHTIEDNSFVDLYNLSTLILTANSLQHLGLAAFHGLTSLKKLVLVETSISSLSDLPIGHLNTLQELNLGHNNIASLKLPKYFANLTSLRHLSFSSNNITYISKGDLDALRETNRLNLTLVLSLNNIKYIQSGSFAKIHLGELILRSSFENLNAMHSSLQGLAGLQVNRLIVGEFTNILKITAFQNGLLSGLCQVQMQEFVLMCFREFENDTDTLFDCIGNVTTIRLVDLNLETLSEVPMFSQVKHLEWKR	L+RCHIHTIEDNSF DL+NLSTLILTANSLQHLGLAAF+GLTSLKKLVLVETSISSLSDLPIGHLNTLQELNLGHNNIASLKLPKYFA+LTSLR+LSFSSNNITYISKGDLDALRETNR+NLTLVLSLNNIK IQSGSFAKIHLGEL+LRSSFE+ N MHSSL GLAGLQVNRLIVGEFTNILKIT FQN LLSGLCQVQMQEFVLMCFREFEN+TDTLF+CI NV++IRLVDLNLETLSEVP FSQVK+LEWK+
41373	Query_326	5-contig_18646_1	863	gi|237872216|gb|ACR26550.1|TLR15 [Gallus gallus]	ACR26550	868	1	1585.85	4105	0	1	862	1	868	0	0	771	809	6	868	MRILIGSLYFYFISFLLSRANGFLSQRTSPAPSFPFYNYSYLNLSSVSEAQAPHTARALNFSHNAIKKITKRDFEGFDALEILDLSHNHIKDIEPGAFENLLSLVSVNLSFNDKNLLV----PHLKVVPSSRASGPAHIYMLSQKSAEAALEQPAAAELLPHSEE--DPGNVKPRFRQRRAEEKTPSPRATTPSPDSCGAPINGLLDLSRSKLSSEELTAKLDPDLCQDQLGAVLEFNVSHSDLEMDLLSLFILF	MRILIGSLYFYFISFLFSKVNGFLTQRTSPVSSFPFYNYSYLNLSSVSQAQAPKTARALNFSYNAIEKITKRDFEGFHVLEVLDLSHNHIKDIEPGAFENLLSLVSVDLSFNDKNLLVSGLAPHLKLIPTSGASGPSQIYMYFQKSAEAALEPSAPAELLPHLEDPPNPGNVNPRFRQRRTEENKTSPPAATLRPDLCGAPINGLLDLSRTKLSNEELTAKLDADLCQAQLGTVLEFNISHSDLEMDLLSLFILF	MRILIGSLYFYFISFL S+ NGFL+QRTSP SFPFYNYSYLNLSSVS+AQAP TARALNFS+NAI+KITKRDFEGF LE+LDLSHNHIKDIEPGAFENLLSLVSV+LSFNDKNLLV PHLK++P+S ASGP+ IYM QKSAEAALE A AELLPH E+ +PGNV PRFRQRR EE SP A T PD CGAPINGLLDLSR+KLS+EELTAKLD DLCQ QLG VLEFN+SHSDLEMDLLSLFILF
161641	Query_141	10-contig_29956_1	991	gi|241982727|ref|NP_001155273.1|protein ELYS [Gallus gallus]	NP_001155273	2268	1	1015.76	2625	0	343	963	1511	2132	0	0	530	557	1	622	KTPHFLVLEEVVVKPQASEESPETSPCSELHPSGNLQYNYDTIEQQFAYDLPDNKDGECYAVEGDGELFISQSNFTLVLEGEEGEGEMGDLAIADASKAAVTATGENPVKSLGNTESEEHVTNSVSTVTNDQESQNITESLPYVPEPIKVAIAENLLDVIKDTRSKEFTSEVVEQSIHESIGRKVTRFQKSKTTLTTVPEGADDETGIHQVEYVVTPRTRARRQLRRTLIIQSTDDQQALKTDKPVLFGLSPRRS	KTEEINVLEEVAVKAQTSEESPETSPYSELHPSGNLQYNYDTIEQQFAYDLPDNKDGECFAVEGDGELFISQSNFTLVLEGEEGEGEMGDLALADASKAAVTTTDEKPANSLGSTENEEHVKNSVSTVTSDQESQNIAESLPYVPEPIKVAIAENLLDVIKDTRSKEFTSEVVEQSIHESIGKKVTRFRKSKTPLTAVPEGADDETSIHQVEYVVTPRTRARRQLSRTLIIPSADDQQVLKTDKPVLFGLSPRRS	KT VLEEV VK Q SEESPETSP SELHPSGNLQYNYDTIEQQFAYDLPDNKDGEC+AVEGDGELFISQSNFTLVLEGEEGEGEMGDLA+ADASKAAVT T E P SLG+TE+EEHV NSVSTVT+DQESQNI ESLPYVPEPIKVAIAENLLDVIKDTRSKEFTSEVVEQSIHESIG+KVTRF+KSKT LT VPEGADDET IHQVEYVVTPRTRARRQL RTLII S DDQQ LKTDKPVLFGLSPRRS
352161	Query_733	122-contig_20744_1	1673	gi|2497655|sp|Q90953.1|CSPG2_CHICKRecName: Full=Versican core protein; AltName: Full=Chondroitin sulfate proteoglycan core protein 2; Short=Chondroitin sulfate proteoglycan 2; AltName: Full=Large fibroblast proteoglycan; AltName: Full=PG-M; Flags: Precursor	Q90953	3562	1	1756.11	4547	0	449	1514	340	1395	0	0	919	972	18	1070	FRAQCYAQQFFLPLYLFLSVTCKKIVTEPTTVKLVTTLKTDSVKPSSAKVTLKPSVFESSVTEVAVTETKVPAWEEATLETEDTKMTTEVAEEKREMEVLMENIKLTTLLPQTVTDGEISPYDTLGRTEYDVSPRLTESTSAALEVEHTYSEAELSEEQGRSESTEDAFLTSVVFQDSTAVAKSSTGSWEDVETGDTQKHDADNQTEQIEVGPVMAATDSLVPASQRELPRTGTSVSLTKENLYLGSHSTKEPTK	FDAYCYER--------------KKIVSEPTTVKLVTTLKTDSVELSSAKVTLKPSVFESSVTEVAVTKTKVPAWEEATLETEDTKMTTEVAEEKREMEVLMENIKLTTLLPQTVTDGEISPYDTLGRTEYDVSPRLTESTSAALEVEHTYSEAELSEEQGRSESTEDAFLTSVVFQDSTAVAKSSTGSWEDIETGDTQKHDGDNQTEQIEVGPVMTATDSLVPASQRELPRTGSSVSLTKENLYLGSHSTKEPTK	F A CY + KKIV+EPTTVKLVTTLKTDSV+ SSAKVTLKPSVFESSVTEVAVT+TKVPAWEEATLETEDTKMTTEVAEEKREMEVLMENIKLTTLLPQTVTDGEISPYDTLGRTEYDVSPRLTESTSAALEVEHTYSEAELSEEQGRSESTEDAFLTSVVFQDSTAVAKSSTGSWED+ETGDTQKHD DNQTEQIEVGPVM ATDSLVPASQRELPRTG+SVSLTKENLYLGSHSTKEPTK
301349	Query_793	2-contig_7400_1	572	gi|257357667|dbj|BAI23207.1|heat shock protein 90kDa beta (cytosolic), class B member 1 [Coturnix japonica]	BAI23207	724	1	984.556	2544	0	1	489	1	489	0	0	483	488	0	489	MPEEVQHGEEEAETFAFQAEIAQLMSLIINTFYSNKEIFLRELISNASDALDKIRYESLTDPSKLDSGKDLKIDIVPNPRDRTLTLLDTGIGMTKADLINNLGTIAKSGTKAFMEALQAGADISMIGQFGVGFYSAYLVAEKVVVITKHNDDEQYAWESSAGGSFTVRTDRGEPIGRGTKVILYLKEDQTEYLEERRVKEVVKKHSQFIGYPITLYVEKEREKEISDDEAEEEKAEKEEEESKDEEKPKIEDVGS	MPEEVQHGEEEVETFAFQAEIAQLMSLIINTFYSNKEIFLRELISNASDALDKIRYESLTEPSKLDSGKDLKIDIVPNPRERTLTLLDTGIGMTKADLINNLGTIAKSGTKAFMEALQAGADISMIGQFGVGFYSAYLVAEKVVVITKHNDDEQYAWESSAGGSFTVRTDRGEPIGRGTKVILYLKEDQTEYLEERRVKEVVKKHSQFIGYPITLYVEKEREKEISDDEAEEEKAEKEEEESKDEEKPKIEDVGS	MPEEVQHGEEE ETFAFQAEIAQLMSLIINTFYSNKEIFLRELISNASDALDKIRYESLT+PSKLDSGKDLKIDIVPNPR+RTLTLLDTGIGMTKADLINNLGTIAKSGTKAFMEALQAGADISMIGQFGVGFYSAYLVAEKVVVITKHNDDEQYAWESSAGGSFTVRTDRGEPIGRGTKVILYLKEDQTEYLEERRVKEVVKKHSQFIGYPITLYVEKEREKEISDDEAEEEKAEKEEEESKDEEKPKIEDVGS
334932	Query_922	9-contig_14059_1	483	gi|26522477|dbj|BAC44831.1|skeletal muscle sodium channel [Gallus gallus]	BAC44831	487	1	966.452	2497	0	1	482	6	487	0	0	471	476	0	482	MVFDFVTKQVFDITIMILICLNMVTMMVETDDQSEVKTDILYKINLVFIVIFTGECVLKMFALRYYYFTVGWNIFDFVVVILSIAGIVLSDIIEKYFVSPTLFRVIRLARIGRVLRLIRGAKGIRTLLFALMMSLPALFNIGLLLFLVMFIYSIFGMSNFAYVKKEAGIDDIFNFETFGNSIICLFQITTSAGWDGLLSPILNSGPPDCDPDLENPGSSIKGNCGNPSIGIFFFCSYIIISFLIVVNMYIAIILE	MVFDFVTKQVFDITIMILICLNMVTMMVETDDQSETKTDILYKINLIFIVIFTGECVLKMFALRYYYFTIGWNIFDFVVVILSIAGIVLSDIIEKYFVSPTLFRVIRLARIGRVLRLIRGAKGIRTLLFALMMSLPALFNIGLLLFLVMFIYSIFGMSNFAYVKKEAGIDDIFNFETFGNSIICLFQITTSAGWDGLLSPILNSGPPDCDPNLENPGSSIKGNCGNPSIGIFFFCSYIIISFLIVVNMYIAIILE	MVFDFVTKQVFDITIMILICLNMVTMMVETDDQSE KTDILYKINL+FIVIFTGECVLKMFALRYYYFT+GWNIFDFVVVILSIAGIVLSDIIEKYFVSPTLFRVIRLARIGRVLRLIRGAKGIRTLLFALMMSLPALFNIGLLLFLVMFIYSIFGMSNFAYVKKEAGIDDIFNFETFGNSIICLFQITTSAGWDGLLSPILNSGPPDCDP+LENPGSSIKGNCGNPSIGIFFFCSYIIISFLIVVNMYIAIILE
183237	Query_592	18-contig_3344_1	1053	gi|26801170|emb|CAD58708.1|cohesin complex subunit [Gallus gallus]	CAD58708	1217	1	1277.69	3305	0	11	722	67	873	0	0	689	694	119	819	EGTGPRVISAFVEIIFDNSDNRLPI-----------------------------------------------------NQMATAPDSQRLKLLREVAGTRVYDERKEESISLMKETEGKREKINELLKYIEERLHTLEEEKEELAQYQKWDKMRRALEYTIYNQELNETRAKLDELSAKRETSGEKSRQLRDAQQDARDKMEEIERQVRELKTKISAMKEEKEQLSAERQEQIKQRTKLELKAKDLQDELAGNSE	EGTGPRVISAFVEIIFDNSDNRLPIDKEEVSLRRVIGAKKDQYFLDKKMVTKNDVMNLLESAGFSRSNPYYIVKQGKINQMATAPDSQRLKLLREVAGTRVYDERKEESISLMKETEGKREKINELLKYIEERLHTLEEEKEELAQYQKWDKMRRALEYTIYNQELNETRAKLDELSAKRETSGEKSRQLRDAQQDARDKMEEIERQVRELKTKISAMKEEKEQLSAERQEQIKQRTKLELKAKDLQDELAGNSE	EGTGPRVISAFVEIIFDNSDNRLPI NQMATAPDSQRLKLLREVAGTRVYDERKEESISLMKETEGKREKINELLKYIEERLHTLEEEKEELAQYQKWDKMRRALEYTIYNQELNETRAKLDELSAKRETSGEKSRQLRDAQQDARDKMEEIERQVRELKTKISAMKEEKEQLSAERQEQIKQRTKLELKAKDLQDELAGNSE
39723	Query_615	1-contig_16678_1	1230	gi|269784804|ref|NP_001161474.1|plasma membrane calcium-transporting ATPase 1 [Gallus gallus]	NP_001161474	1205	1	1282.32	3317	0	116	804	59	734	0	0	665	667	13	689	CTSACGYSSLGLSGNPADIERREAVFGKNFIPPKKPKTFLQLVWEALQDVTLIILEIAAVVSLGLSFYQPPGGNEALCGSVNVGEEEEESEAGWIEGAAILLSVVCVVLVTAFNDWSKEKQFRGLQSRIEQEQKFTVIRGGQVIQIPVADIIVGDIAQVKYGDLLPADGILIQGNDLKIDESSLTGESDHVKKSLDRDPMLLSGTHVMEGSGRMVVTAVGVNSQTGIIFTLLGAGGDEEEKEKEKKDKKSKKQDG	CTKLKTSPNEGLSGNPADIERREAVFGKNFIPPKKPKTFLQLVWEALQDVTLIILEIAAVVSLGLSFYQPPGGNEALCGSVNVGEEEEESEAGWIEGAAILLSVVCVVLVTAFNDWSKEKQFRGLQSRIEQEQKFTVIRGGQVIQIPVADIIVGDIAQVKYGDLLPADGILIQGNDLKIDESSLTGESDHVKKSLDRDPMLLSGTHVMEGSGRMVVTAVGVNSQTGIIFTLLGAGGDEEEKEKEKKDKKTK----	CT + GLSGNPADIERREAVFGKNFIPPKKPKTFLQLVWEALQDVTLIILEIAAVVSLGLSFYQPPGGNEALCGSVNVGEEEEESEAGWIEGAAILLSVVCVVLVTAFNDWSKEKQFRGLQSRIEQEQKFTVIRGGQVIQIPVADIIVGDIAQVKYGDLLPADGILIQGNDLKIDESSLTGESDHVKKSLDRDPMLLSGTHVMEGSGRMVVTAVGVNSQTGIIFTLLGAGGDEEEKEKEKKDKK+K
321282	Query_200	4-contig_24265_1	2863	gi|27526479|emb|CAC81239.1|arg3.1 protein [Gallus gallus]	CAC81239	404	1	843.573	2178	0	1949	2351	1	403	0	0	401	403	0	403	MQLDNVTNAGIHSFQGHRGVANKPNVILQIGKCRAEMLEHVRRTHRHLLSEVSKQVERELKGLQKSVGKLENNLEDHVPTDNQRWKKSIKACLARCQETIAHLERWVKREMNVWKEVFFRLERWADRLESMGGKYCPGEHGKQTVSVGVGGPEIRPSEGEIYDYALDMSQMYALTPAPGEVPSIPQAHDSYQWVSVSEDAPASPVETQIFEDPHEFLSHLEEYLKQVGGTEEYWLSQIQNHMNGPAKKWWEYKQD	MQLDNVTNAGIHSFQGHRGVANKPNVILQIGKCRAEMLEHVRRTHRHLLSEVSKQVERELKGLQKSVGKLENNLEDHVPTDNQRWKKSIKACLARCQETIAHLERWVKREMNVWKEVFFRLEKWADRLESMGGKYCPGEHGKQTVSVGVGGPEIRPSEGEIYDYALDMSQMYALTPAPGEVPSIPQAHDSYQWVSVSEDAPASPVETQIFEDPHEFLSHLEEYLKQVGGTEEYWLSQIQNHMNGPAKKWWEYKQD	MQLDNVTNAGIHSFQGHRGVANKPNVILQIGKCRAEMLEHVRRTHRHLLSEVSKQVERELKGLQKSVGKLENNLEDHVPTDNQRWKKSIKACLARCQETIAHLERWVKREMNVWKEVFFRLE+WADRLESMGGKYCPGEHGKQTVSVGVGGPEIRPSEGEIYDYALDMSQMYALTPAPGEVPSIPQAHDSYQWVSVSEDAPASPVETQIFEDPHEFLSHLEEYLKQVGGTEEYWLSQIQNHMNGPAKKWWEYKQD
315662	Query_428	30-contig_11493_1	933	gi|280977731|gb|ACD36583.2|heat shock protein 70 [Anser cygnoides]	ACD36583	634	1	887.1	2291	0	242	796	1	555	0	0	426	493	4	557	MSAECSAVGIDLGTTYSCVGVWKNDTVEIIANDQGNRTTPSYVAFTDTERLVGDAAKNQVARNPENTIFDAKRLIGRKFDDPSVQSDMKHWPFKVIAGKGDKPLIEVHYQGETKCFHPEEISAMVLGKMKDISESYLGRPVKEAVITVPAYFNDSQRQATKDAGTIAGLNVLRIINEPTAAAIAYGLDKRG--CGEMNVLIFDMGGGTFDVSLLTIEDGIFEVRATAGDTHLGGEDFDNRLVDFCVQDFKRKNRG	MSGKGPAIGIDLGTTYSCVGVFQHGKVEIIANDQGNRTTPSYVAFTDTERLIGDAAKNQVAMNPTNTIFDAKRLIGRKYDDPTVQSDMKHWPFRVV-NEGGKPKVQVEYKGEMKTFFPEEISSMVLTKMKEIAEAYLGRKVQNAVITVPAYFNDSQRQATKDAGTITGLNVMRIINEPTAAAIAYGLDKKGTRAGEKNVLIFDLGGGTFDVSILTIEDGIFEVKSTAGDTHLGGEDFDNRMVNHFVEEFKRKHK-	MS + A+GIDLGTTYSCVGV+++ VEIIANDQGNRTTPSYVAFTDTERL+GDAAKNQVA NP NTIFDAKRLIGRK+DDP+VQSDMKHWPF+V+ +G KP ++V Y+GE K F PEEIS+MVL KMK+I+E+YLGR V+ AVITVPAYFNDSQRQATKDAGTI GLNV+RIINEPTAAAIAYGLDK+G GE NVLIFD+GGGTFDVS+LTIEDGIFEV++TAGDTHLGGEDFDNR+V+ V++FKRK++
233970	Query_273	25-contig_3624_1	464	gi|283580069|gb|ADB27921.1|5-hydroxytryptamine receptor 6 precursor-like protein [Gallus gallus]	ADB27921	433	1	820.076	2117	0	1	463	1	433	0	0	410	416	30	463	MEGDFGSPNASVLGERSLLVGSSWVAAFLCFIILLTTAGNFLLILLIVTQRSLRNTSNYFLVSLFMSDLMVGLVVMPPAMLNQLYGHWVLRGDFCSLWYSFDVMCCSASILNLCVISLDRYLLIISPLKYKLRMTSCRALWLILATWTLAALASFLPIKLGWHKLEFEVWSPNVTSRGDEEQCRLVVSLPYALVASCLTFFLPSAAISFTYCRILLAARKQAVQVASLTSNVATAATDESTAQVPHTPSQPAAGS	MEGNLGSPNASVLGERSLLVGSSWVAAFLCFIILLTTAGNFLLILLIVTQRSLRNTSNYFLVSLFMSDLMVGLVVMPPAMLNQLYGHWVLRGDFCSLWYAFDVMCCSASILNLCVISLDRYLLIISPLKYKLRMTSCRALWLILATWTLAALASFLPIKLGWHKLEFEVWSPNVTSRGDEEQCRLVVSLPYALVASCLTFFLPSAAISFTYCRILLAARKQAVQVASLASNVATATTDESMEQVPHAPSQPAAGS	MEG+ GSPNASVLGERSLLVGSSWVAAFLCFIILLTTAGNFLLILLIVTQRSLRNTSNYFLVSLFMSDLMVGLVVMPPAMLNQLYGHWVLRGDFCSLWY+FDVMCCSASILNLCVISLDRYLLIISPLKYKLRMTSCRALWLILATWTLAALASFLPIKLGWHKLEFEVWSPNVTSRGDEEQCRLVVSLPYALVASCLTFFLPSAAISFTYCRILLAARKQAVQVASL SNVATA TDES QVPH PSQPAAGS
388932	Query_93	4-contig_11258_1	1526	gi|289684206|ref|NP_001166252.1|5-hydroxytryptamine receptor 1B [Gallus gallus]	NP_001166252	379	1	694.501	1791	0	460	835	1	372	0	0	355	362	4	376	MEPASPCPAPLLPANDSYHGRNCSADEGIYQDATPLSGKIVLAVVLALVTLATVLSNAFVIATVYQTRKLHTPANYLIASLAVTDLLVSILVMPISSLYTVTGRWTLGQVVCDLWLSSDITCCTASILHLCVIALDRYWAITDAVEYSTKRTPKRAAGMIALVWVFSICISIPPLFWRQAKAEEVSHCVVNTDHVLYTVYSTVGAFYFPTLLLIALYGRIYVEARSRILKQTPKKAGKRLTRAQLITDSPGSSSS	MEPASPCPAPLLPANDSYHGRNCSAEEGIYQDATPLSGKIVLAVVLALVTLATVLSNAFVIATVYQTRKLHTPANYLIASLAFTDLLVSILVMPISTLYTVTGKWTLGQVVCDIWLSSDITCCTASILHLCVIALDRYWAITDAVEYSTKRTPKRAAGMIALVWVFSICISMPPLFWRQAKAEEASNCAVNTDHVLYTVYSTVGAFYFPTLLLIALYGRIYVEARSRILKQTPKKAGKRLTRAQLITDSPGSSSS	MEPASPCPAPLLPANDSYHGRNCSA+EGIYQDATPLSGKIVLAVVLALVTLATVLSNAFVIATVYQTRKLHTPANYLIASLA TDLLVSILVMPIS+LYTVTG+WTLGQVVCD+WLSSDITCCTASILHLCVIALDRYWAITDAVEYSTKRTPKRAAGMIALVWVFSICIS+PPLFWRQAKAEE S+C VNTDHVLYTVYSTVGAFYFPTLLLIALYGRIYVEARSRILKQTPKKAGKRLTRAQLITDSPGSSSS
293872	Query_323	4-contig_18178_1	2489	gi|294661885|ref|NP_001171003.1|A-kinase anchor protein SPHKAP [Gallus gallus]	NP_001171003	1656	1	2313.88	5995	0	719	2053	145	1416	0	0	1150	1195	65	1336	CPWQADVCLVQCARGDRKNSASCIVFEINKFLIGLELVQERQLQIEAHVSKPEDDTNCSVSSIEEDFLTASEHLEEENEADEYKTGKSNSIIPLFTATMAIKLHLMLIYAYKYMIAIQTLNCCSVLQSSSVLDSYAAIFVLKIQIAHEKISISEASSDVKKSKGKGFESLQYRKARLPLILEGNCVNKDNTASRISEGVNVVTEDGISQPEDKPDQEIPCQKELVGRDTSSLSTEDLTNNAENTYSVNVLEDESL	CPWQADVCLVQCARGDRKNSASCIIFEINKFLIGLELVQERQLQIEAH-----------VSKPEDDTNCSVSSIEED----------------FLTASEH-------------------------LEEENEADEY--------KTAHEKISVSEASSDVRKNKGKGFESLHYRKARLPLILEGNCVNEDNTASKVSESVHVVAEDGISQPEDKPEQEILCQEELVGRDTSSLSTEDLTNNVENSCSVNVL-DVSL	CPWQADVCLVQCARGDRKNSASCI+FEINKFLIGLELVQERQLQIEAH VS E+D + +EE+ TA+ L+ + D Y + AHEKIS+SEASSDV+K+KGKGFESL YRKARLPLILEGNCVN+DNTAS++SE V+VV EDGISQPEDKP+QEI CQ+ELVGRDTSSLSTEDLTNN EN+ SVNVL D SL
282627	Query_834	6-contig_18187_1	803	gi|3023269|sp|P79785.1|AGTR1_CHICKRecName: Full=Type-1 angiotensin II receptor; AltName: Full=Angiotensin II type-1 receptor; Short=AT1	P79785	359	1	671.389	1731	0	159	487	1	329	0	0	328	328	0	329	MVPNYSTEETVKRIHVDCPVSGRHSYIYIMVPTVYSIIFIIGIFGNSLVVIVIYCYMKLKTVASIFLLNLALADLCFLITLPLWAAYTAMEYQWPFGNCLCKLASAGISFNLYASVFLLTCLSIDRYLAIVHPVKSRIRRTMFVARVTCIVIWLLAGVASLPVIIHRNIFFAENLNMTVCGFRYDNNNTTLRVGLGLSKNLLGFLIPFLIILTSYTLIWKTLKKAYQIQRNKTRNDDIFKMIVAIVFFFFFSWIP	MVPNYSTEETVKRIHVDCPVSGRHSYIYIMVPTVYSIIFIIGIFGNSLVVIVIYCYMKLKTVASIFLLNLALADLCFLITLPLWAAYTAMEYQWPFGNCLCKLASAGISFNLYASVFLLTCLSIDRYLAIVHPVKSRIRRTMFVARVTCIVIWLLAGVASLPVIIHRNIFFAENLNMTVCGFRYDNNNTTLRVGLGLSKNLLGFLIPFLIILTSYTLIWKTLKKAYQIQRNKTRNDDIFKMIVAIVFFFFFSWIP	MVPNYSTEETVKRIHVDCPVSGRHSYIYIMVPTVYSIIFIIGIFGNSLVVIVIYCYMKLKTVASIFLLNLALADLCFLITLPLWAAYTAMEYQWPFGNCLCKLASAGISFNLYASVFLLTCLSIDRYLAIVHPVKSRIRRTMFVARVTCIVIWLLAGVASLPVIIHRNIFFAENLNMTVCGFRYDNNNTTLRVGLGLSKNLLGFLIPFLIILTSYTLIWKTLKKAYQIQRNKTRNDDIFKMIVAIVFFFFFSWIP
133816	Query_72	3-contig_2298_1	464	gi|303227900|ref|NP_001026212.2|tRNA (adenine-N(1)-)-methyltransferase non-catalytic subunit TRM6 [Gallus gallus]	NP_001026212	484	1	822.772	2124	0	1	454	1	482	0	0	417	433	28	482	MAVERSRNPLICEGDCAVLKRGDVFKAVPVLRRRKIIFEKQGFYLDKAIGHVYGTTFEVTSDGNLQPKREVEETSTETKEAGTDNRNIVDDGKSQKLTHDDIKALKDKGIKGQEIVQQLIENSTTFRDKTEFAQDK---------------------------YIKKKKKN-HLRYDTLAQMLTLGNVRAGNKMLVMETCAGLLLGAVMERMGGYGSIIQMYPGGGPVRAATSCFGFPKLFFNNLHEFPLSQVDS	MAVERGLSPRICEGDCAVLKRGDVFKAVAVLRQRKIIFEKQGFYLDNAIGHVYGTTFEVTSDGNLQPKRQVEETTTETKEAGTDNRNIVDDGKSQKLTHDDIKALKDKGIKGQEIVQQLIENSTTFRDKTEFAQDKYIKKKKKKYEAVITIVKPSTRILSTMYYAREPGKIIHLRYDTLAQMLTLGNVRAGNKMIVMETCAGLVLGAVMERMGGYGSIIQMYPGGGPIRAATSCFGFPKPFFNNLHEFPLSKVDS	MAVER +P ICEGDCAVLKRGDVFKAV VLR+RKIIFEKQGFYLD AIGHVYGTTFEVTSDGNLQPKR+VEET+TETKEAGTDNRNIVDDGKSQKLTHDDIKALKDKGIKGQEIVQQLIENSTTFRDKTEFAQDK Y ++ K HLRYDTLAQMLTLGNVRAGNKM+VMETCAGL+LGAVMERMGGYGSIIQMYPGGGP+RAATSCFGFPK FFNNLHEFPLS+VDS
47371	Query_336	44-contig_2601_1	1023	gi|30348610|emb|CAD90040.1|BMP/retinoic acid-inducible neural-specific protein [Gallus gallus]	CAD90040	761	1	750.74	1937	0	512	867	383	738	0	0	355	355	0	356	TIQEWLTRVQSLLYCNENGFWGTFLESQRSCVCHGGTSLCQRPIPCIIGGNNSCAMCSLANISLCGSCNKGYKLYRGRCEPQNVDSERSEQFISFETDLDFQDLELKYLLQKMDSRLYVHTTFISNEIRLDTFFDPRWRKRMSLTLKSNKNRMDFIHMVIGISMRICQMRNSSLDPMFFVYVNPFSGSHSEGWNMPFGEYGYPRWEKIRLQNSQCYNWTLLLGNRWKTFFETVHIYLRSRTRLPSLLRNETGQGP	TIQEWLTRVQSLLYCNENGFWGTFLESQRSCVCHGGTSLCQRPIPCIIGGNNSCAMCSLANISLCGSCNKGYKLYRGRCEPQNVDSERSEQFISFETDLDFQDLELKYLLQKMDSRLYVHTTFISNEIRLDTFFDPRWRKRMSLTLKSNKNRMDFIHMVIGISMRICQMRNSSLDPMFFVYVNPFSGSHSEGWNMPFGEYGYPRWEKIRLQNSQCYNWTLLLGNRWKTFFETVHIYLRSRTRLPSLLRNETGQGP	TIQEWLTRVQSLLYCNENGFWGTFLESQRSCVCHGGTSLCQRPIPCIIGGNNSCAMCSLANISLCGSCNKGYKLYRGRCEPQNVDSERSEQFISFETDLDFQDLELKYLLQKMDSRLYVHTTFISNEIRLDTFFDPRWRKRMSLTLKSNKNRMDFIHMVIGISMRICQMRNSSLDPMFFVYVNPFSGSHSEGWNMPFGEYGYPRWEKIRLQNSQCYNWTLLLGNRWKTFFETVHIYLRSRTRLPSLLRNETGQGP
361942	Query_190	4-contig_9619_1	1670	gi|307133750|ref|NP_001182498.1|putative splicing factor, arginine/serine-rich 14 [Gallus gallus]	NP_001182498	1058	1	966.837	2498	0	657	1196	32	578	0	0	463	491	19	553	DCVHVFVVAAHPRPVPRPRYEGSFHDDGRYDDAQHHAHDDWAENPRDEYPGPSYRSASPLIRKSNYYHEQFGHLAS----------HDREYGHPATRDREYGRPASHDREYGRPASRGREYGHPLPRDREYGGLASHDQDYGHPDSWEAAGPHETDFSSSDILGDFRSPGLMEDEYGNVENQEYDVDFGIQPDSEFQPPIRRGSVGRGRALRGKRITRGAAKAKPFKADIRTPLKKWNTKKPQPDPDQKPAVQPD	EAMHHF--KAHSRPVPRPRYEDSFHDDGRYDDAQHHSHDDWAENPRDDYPGPSYRSASPLIRKANYYHEQFGHPASRDREFGHPASHDREYGHPAVRDREYGHPASRDREYGRPASHGRDYGHPLPR----GGLASHDQDYGHPDSWEATGPHETDFSSSDILGDFRSPGLMEDEYGNMENQEYDVDFGIQSDSEFRPPIRRGNIGRGRVLRGKRITRGAAKAKLFKGDIKPPLKKWNPKKLQPGPDQKPTVQPD	+ +H F AH RPVPRPRYE SFHDDGRYDDAQHH+HDDWAENPRD+YPGPSYRSASPLIRK+NYYHEQFGH AS HDREYGHPA RDREYG PAS DREYGRPAS GR+YGHPLPR GGLASHDQDYGHPDSWEA GPHETDFSSSDILGDFRSPGLMEDEYGN+ENQEYDVDFGIQ DSEF+PPIRRG++GRGR LRGKRITRGAAKAK FK DI+ PLKKWN KK QP PDQKP VQPD
381001	Query_332	6-contig_30_1	341	gi|307691162|ref|NP_001182618.1|vav-like protein C9orf100 homolog [Gallus gallus]	NP_001182618	338	1	641.728	1654	0	1	338	1	338	0	0	313	320	0	338	MSYSPLPRMAGANIVEEQRARWERKRCRTAKELLETEHRYLEQLDLVVTFFVTILKAKGTLKPAVMETLFGPLESIYSASQVLSLHLERGNLGLGLENFCQKLELYGHYAENFERANKTLMEQLRKNKSFRRFKKLQETRPQFQGRKLEDLLPLPLQRLHQYKHFLRDLLENTSPVSAESQKLAKAVKSVSEVSQWVQDIDRERENSLQLHRVQKLLKGQKTQVLTPGRWYIREGWLLVVPSKGKDLKRRIFFLF	MSYSPPAPMAGANTVEEQRARWERKRSRTAKELLETEHRYLEQLDLVVTFFVTILKAKGTLKPAVMETIFGPLESIYSASQVLSLHLERGNLGLGLENFCQKLELYGHYAENFEQANKTLMEQLRKNKSFRRFKKLQETRPQFQGRKLEDLLPLPLQRLHQYKHFLRDLLENTSPASAEYQKLAKAVKSVSEVSQWVQDIACKRENSLQLHRVQKLLKGQKTRVLTPGRWYIREGWLLVVPSKGDELKRRMFFLF	MSYSP MAGAN VEEQRARWERKR RTAKELLETEHRYLEQLDLVVTFFVTILKAKGTLKPAVMET+FGPLESIYSASQVLSLHLERGNLGLGLENFCQKLELYGHYAENFE+ANKTLMEQLRKNKSFRRFKKLQETRPQFQGRKLEDLLPLPLQRLHQYKHFLRDLLENTSP SAE QKLAKAVKSVSEVSQWVQDI +RENSLQLHRVQKLLKGQKT+VLTPGRWYIREGWLLVVPSKG +LKRR+FFLF
68359	Query_994	13-contig_7245_1	1473	gi|30962014|gb|AAP37959.1|heat shock protein 70 [Gallus gallus]	AAP37959	634	1	948.732	2451	0	591	1052	1	462	0	0	462	462	0	462	MSGKGPAIGIDLGTTYSCVGVFQHGKVEIIANDQGNRTTPSYVAFTDTERLIGDAAKNQVAMNPTNTIFDAKRLIGRKYDDPTVQSDMKHWPFRVVNEGGKPKVQVEYKGEMKTFFPEEISSMVLTKMKEIAEAYLGKKVQNAVITVPAYFNDSQRQATKDAGTITGLNVMRIINEPTAAAIAYGLDKKGTRAGEKNVLIFDLGGGTFDVSILTIEDGIFEVKSTAGDTHLGGEDFDNRMVNHFVEEFKRKHKRD	MSGKGPAIGIDLGTTYSCVGVFQHGKVEIIANDQGNRTTPSYVAFTDTERLIGDAAKNQVAMNPTNTIFDAKRLIGRKYDDPTVQSDMKHWPFRVVNEGGKPKVQVEYKGEMKTFFPEEISSMVLTKMKEIAEAYLGKKVQNAVITVPAYFNDSQRQATKDAGTITGLNVMRIINEPTAAAIAYGLDKKGTRAGEKNVLIFDLGGGTFDVSILTIEDGIFEVKSTAGDTHLGGEDFDNRMVNHFVEEFKRKHKRD	MSGKGPAIGIDLGTTYSCVGVFQHGKVEIIANDQGNRTTPSYVAFTDTERLIGDAAKNQVAMNPTNTIFDAKRLIGRKYDDPTVQSDMKHWPFRVVNEGGKPKVQVEYKGEMKTFFPEEISSMVLTKMKEIAEAYLGKKVQNAVITVPAYFNDSQRQATKDAGTITGLNVMRIINEPTAAAIAYGLDKKGTRAGEKNVLIFDLGGGTFDVSILTIEDGIFEVKSTAGDTHLGGEDFDNRMVNHFVEEFKRKHKRD
359765	Query_89	1-contig_1746_1	429	gi|311213923|ref|NP_001185641.1|fibronectin precursor [Gallus gallus]	NP_001185641	2483	1	696.041	1795	0	64	414	772	1122	0	0	347	350	0	351	LPSTATSVNIPDLLPGRKYIVNVYQISEEGEQNLILSTSQTTAPDAPPEHTVESVDDTSIVISWSRPQAPITGYRIVYTPSVEGSSTELNLPDTATSVTLSDLMPGVQYNISIYAVEEHQESTPVFIQQETTGEPRTDEVPSPRDLQFVEVSDVKVTIMWTPPQSQVSGYRVEAIPVNRPGQHGQRLPITRSSFAEVVDLLPGTTYLFKIFAVSHGRESKPLTGEQTTKLDAPTNLRFINTTEHSVLVLWTRPRA	LPSTATSVNIPDLLPGRKYIVNVYQISEEGEQNLILSTSQTTAPDAPPEHSVESVDDTSIVISWSRPQAPITGYRIVYTPSVEGSSTELNLPDTATSVTLSDLMPGVQYNISIYAVEEHQESTPVFIQQETTGVPRTDEVPSPKDLQFVEVSDVKVTIMWTPPQSQVSGYRVEAIPVNRPGQHGQRLPITRSSFAEVVDLLPGTTYLFKIFAVSHGRESKPLTGEQTTKLDAPTNLRFINTTEHSVLVLWTRPRA	LPSTATSVNIPDLLPGRKYIVNVYQISEEGEQNLILSTSQTTAPDAPPEH+VESVDDTSIVISWSRPQAPITGYRIVYTPSVEGSSTELNLPDTATSVTLSDLMPGVQYNISIYAVEEHQESTPVFIQQETTG PRTDEVPSP+DLQFVEVSDVKVTIMWTPPQSQVSGYRVEAIPVNRPGQHGQRLPITRSSFAEVVDLLPGTTYLFKIFAVSHGRESKPLTGEQTTKLDAPTNLRFINTTEHSVLVLWTRPRA
172010	Query_242	22-contig_6571_1	2427	gi|312283694|ref|NP_001186037.1|suppressor of cytokine signaling 4 [Gallus gallus]	NP_001186037	436	1	774.622	1999	0	326	738	1	413	0	0	394	403	0	413	MAENKDNSIKNADVRPKSSRSRSADRKDGYVWSGKKLSWSKKTEHCSDAETASAAGRSGPNLRSQERKYSCSSIELDLDRSCGHRFLGRSLKQKLQDAVGQCFPIKNCSSRHASGLQSKRKIHISELMLDKCPFPPRSDLAFRWHLIKRHTAPVSQKAEDWMIADLSQGGEKEEDLRDNEVECDPPSAPSPSSELTDGVPSGRDSRSELAAGKAGRSSKDDSDMDSDDEVITLCTSSRKRNKPKWETDDELLRME	MAENKDSNTKNTDVRPKSSRSRSADRKDGYVWSGKKLSWSKKTERCSDAETANAAGRSGPNLRSQERKYSCSSIELDLDRSCGHRFLGRSLKQKLQDAVGQCFPIKNCTSRHASGLQSKRKIHISELMLDKCPFPPRSELAFRWHLIKRHTAPVNQKAEDWIIADLSQNEEKEEDLRDNEVESDPPSAPSPSSDLTDGIPSRRDSRSELVAGKVVRSSKDDSDMDSDDEVITLCTSSRKRNKPKWETDDELLRME	MAENKD++ KN DVRPKSSRSRSADRKDGYVWSGKKLSWSKKTE CSDAETA+AAGRSGPNLRSQERKYSCSSIELDLDRSCGHRFLGRSLKQKLQDAVGQCFPIKNC+SRHASGLQSKRKIHISELMLDKCPFPPRS+LAFRWHLIKRHTAPV+QKAEDW+IADLSQ EKEEDLRDNEVE DPPSAPSPSS+LTDG+PS RDSRSEL AGK RSSKDDSDMDSDDEVITLCTSSRKRNKPKWETDDELLRME
254116	Query_1048	36-contig_11520_1	2003	gi|313747601|ref|NP_001186368.1|tau-tubulin kinase 1 [Gallus gallus]	NP_001186368	1365	1	883.634	2282	0	12	521	699	1208	0	0	499	502	0	510	KSFEMNGLPKAVPLSLPYQDFRKDMLDYWEKAKASHRIKRVDFSNVVLTAPCKPLEPYLEMNGKEEEEEDEEEDEDEEEDEEDVEEEGDEIDMHSGSSSDLSQKSTERSQECAPSTLLADDQKGSKGRASMADGDLELEEGSKTLVLFSPGDLKKSPVTTDLPPEVDLGTLAALTPQSERPQPMGSQLDVSEPGTLSSVLKSEPKPPVAVATASSPFTKVERTFVHIAEKTHLNVMSSSGQLMRHEEYCPPGQFE	ESFEMNGLPKAVPLSLPYQDFRKDMLDYWEKAKLSQRIKRVDFSNVVLTAPCKPLEPYLEMNGKEEEEEDEEEDEDEEEDEEDVEEEGDEIDMHSGSSSDLSQKSTERSQECAPSTLLADDQKGSKGRASMADGDLELEEGSKTLVLFSPGDLKKSPVTTDLPPEVDLGTLAALTPQSERPQPMGSQLDVSEPGTLSSVLKSEPKPPVAVATASSPFTKVERTFVHIAEKTHLNVMSSSGQLMRHEEYCPPGQFE	+SFEMNGLPKAVPLSLPYQDFRKDMLDYWEKAK S RIKRVDFSNVVLTAPCKPLEPYLEMNGKEEEEEDEEEDEDEEEDEEDVEEEGDEIDMHSGSSSDLSQKSTERSQECAPSTLLADDQKGSKGRASMADGDLELEEGSKTLVLFSPGDLKKSPVTTDLPPEVDLGTLAALTPQSERPQPMGSQLDVSEPGTLSSVLKSEPKPPVAVATASSPFTKVERTFVHIAEKTHLNVMSSSGQLMRHEEYCPPGQFE
156250	Query_1032	1-contig_7979_1	606	gi|313760565|ref|NP_001186479.1|amphoterin-induced protein 2 precursor [Gallus gallus]	NP_001186479	521	1	1020.38	2637	0	85	605	1	521	0	0	502	509	0	521	MSLNCQTLPTRLGVCKVNCRALACLLVFAVSVGGSAPGMCPTACICASDIISCTNKNLSRVPGNLYRSMKRLDLSYNRIGFLEPEWVPVLLEKLNTLIINHNSISSIITGSFSTTPNLKYLDLSSNSLKTLGSPVFQELGALEVLLLYNNQITHIESSAFGGLYKLQKLYLSYNLLLHFPLDLFVGKHKLTELILLDISFNHIQSMPIQRLSSVPAKHLSGVYLHGNPFYCDCTLYSMLIFWYQRHFSSVVDFRS	MSLNCRTLPIQLGACKVNCRALVCLLVFAVSVSGSAPGMCPTTCICASDIISCTNKNLSRVPGNLYRSMKRLDLSYNRIGFLEPEWVPVLFEKLNTLIINHNSISSIITGSFSTTPNLKYLDLSSNSLKTLGSPVFQELGTLEVLLLYNNQITHIESSAFGGLYKLQKLYLSYNFLLHFPLDLFVGKHKLTELILLDISFNHIQSMPIQRLSSVPAKHLSGVYLHGNPFYCDCTLYSMLIFWYQRHFSSVVDFKS	MSLNC+TLP +LG CKVNCRAL CLLVFAVSV GSAPGMCPT CICASDIISCTNKNLSRVPGNLYRSMKRLDLSYNRIGFLEPEWVPVL EKLNTLIINHNSISSIITGSFSTTPNLKYLDLSSNSLKTLGSPVFQELG LEVLLLYNNQITHIESSAFGGLYKLQKLYLSYN LLHFPLDLFVGKHKLTELILLDISFNHIQSMPIQRLSSVPAKHLSGVYLHGNPFYCDCTLYSMLIFWYQRHFSSVVDF+S
234295	Query_1074	10-contig_11454_1	792	gi|314122214|ref|NP_001186619.1|signal-induced proliferation-associated 1-like protein 1 [Gallus gallus]	NP_001186619	1785	1	1019.99	2636	0	129	627	1	499	0	0	498	499	0	499	MTSLKRSQTERAVATGVSVGTDGTSKVHSDDFYMRRFRSQNGSLGSAVMAPVGPPRNESSHHVTSTPGVPKMGVRARIADWPPRKENIKETSRSSQDIETASCLDSMSSKSSPGSQGSSVNLNASDSVMLKSIQNTLKSKTRQSENLDSRFLTPDGYPSSPRKALRRIRQRSNSDITISELDVDSFDECISPTFKSGPSLHREYGSTSSIDKQGTSGESFFDLLKGYKDEKSDQRSPGTTKLSELLIASGSKGSG	MTSLKRSQTERAVATGVSVGTDGTTKVHSDDFYMRRFRSQNGSLGSAVMAPVGPPRNESSHHVTSTPGVPKMGVRARIADWPPRKENIKETSRSSQDIETASCLDSMSSKSSPGSQGSSVNLNASDSVMLKSIQNTLKSKTRQSENLDSRFLTPDGYPSSPRKALRRIRQRSNSDITISELDVDSFDECISPTFKSGPSLHREYGSTSSIDKQGTSGESFFDLLKGYKDEKSDQRSPGTTKLSELLIASGSKGSG	MTSLKRSQTERAVATGVSVGTDGT+KVHSDDFYMRRFRSQNGSLGSAVMAPVGPPRNESSHHVTSTPGVPKMGVRARIADWPPRKENIKETSRSSQDIETASCLDSMSSKSSPGSQGSSVNLNASDSVMLKSIQNTLKSKTRQSENLDSRFLTPDGYPSSPRKALRRIRQRSNSDITISELDVDSFDECISPTFKSGPSLHREYGSTSSIDKQGTSGESFFDLLKGYKDEKSDQRSPGTTKLSELLIASGSKGSG
279043	Query_351	17-contig_977_1	632	gi|314122237|ref|NP_001186631.1|SNF-related serine/threonine-protein kinase [Gallus gallus]	NP_001186631	765	1	659.062	1699	0	183	510	360	687	0	0	323	326	0	328	RQSWPTKIDVPQDLEDDLTASPLSHATVPQSPARTAENVLNGHRSKATGDTAKKEEVPELAGPALSVVPSVSLKPTTSGRKCLFRVEEDEEEDEEDKKPISLSTQVVLRRKPSVTNRLTSRKSAPVLNQIFEEGESDDEFDMDENLPPKLSRLKMNIASPSTVHKRYHRRKSQGRGSSCSSSETSDDDSESRRRLDKDSGFTYSWHRRDSSEGPPGSQGDGGGQSKPSNGNGGVDKTSPGDNNKGGGSPSSNSSG	RQSWPTKIDVPQDLEDDLTASPLSHATVPQSPARTAENVLNGHRSKAAGESAKKEEIPELAGPALSVVPSVSLKPTTSGRKCLFRVEEDEEEDEEDKKPISLSTQVVLRRKPSVTNRLTSRKSAPVLNQIFEEGESDDEFDMDENLPPKLSRLKMNIASPSTVHKRYHRRKSQGRGSSCSSSETSDDDSESRRRLDKDSGFTYSWHRRDSSEGPPGSQGDGGGQSKPSNGNGGVDKTSPGDNNKGGGSPSSNSSG	RQSWPTKIDVPQDLEDDLTASPLSHATVPQSPARTAENVLNGHRSKA G++AKKEE+PELAGPALSVVPSVSLKPTTSGRKCLFRVEEDEEEDEEDKKPISLSTQVVLRRKPSVTNRLTSRKSAPVLNQIFEEGESDDEFDMDENLPPKLSRLKMNIASPSTVHKRYHRRKSQGRGSSCSSSETSDDDSESRRRLDKDSGFTYSWHRRDSSEGPPGSQGDGGGQSKPSNGNGGVDKTSPGDNNKGGGSPSSNSSG
364977	Query_294	11-contig_6387_1	936	gi|326485710|gb|ADZ76110.1|steroid receptor coactivator 2 [Coturnix japonica]	ADZ76110	1462	1	738.413	1905	0	319	680	371	732	0	0	359	362	0	362	HREQNVCGMNQDLTGQGMGKILNPISSSSPAHQAMCSGNPGQDMTISSNINFAINGPKEQMGMPAGRFGGSGGMNHVSSIQASTPQGSNYALKMNSPSQSSPGMNPGQPNSMLSPRHRVSPGVAGSPRIPPSQFSPAGSLHSPVGVCSSTGNSHNYTNSSLNALQALSEGHGVSLGSSLASPDLKMGNLQNSPVNMNPPQLSKMGSLDSKDCFGLYGEQSEGTTGQTESSCHSGEQKDNSESSVPPVVSGERPDG	HREQNVCGMNQDLTGQGMGKILNPISSSSPAHQAMCSGNPGQDMTISSNMNFAINGPKEQMGMPAGRFGGSGGMNHVSSIQASTPQGSNYALKMNSPSQSSPGMNPGQPNSMLSPRHRVSPGVAGSPRIPPSQFSPAGSLHSPVGVCSSTGNSHNYTNSSLNALQALSEGHGVSLGSSLASPDLKVGNLQNSPVNMNPPQLSKMGSLDSKDCFGLYGEQSEGTTGQTESSCHSGEQKDNSESSVPPVVSGERPDG	HREQNVCGMNQDLTGQGMGKILNPISSSSPAHQAMCSGNPGQDMTISSN+NFAINGPKEQMGMPAGRFGGSGGMNHVSSIQASTPQGSNYALKMNSPSQSSPGMNPGQPNSMLSPRHRVSPGVAGSPRIPPSQFSPAGSLHSPVGVCSSTGNSHNYTNSSLNALQALSEGHGVSLGSSLASPDLK+GNLQNSPVNMNPPQLSKMGSLDSKDCFGLYGEQSEGTTGQTESSCHSGEQKDNSESSVPPVVSGERPDG
136997	Query_302	3-contig_12520_1	978	gi|326910955|ref|XP_003201829.1|PREDICTED: Golgin subfamily B member 1-like [Meleagris gallopavo]	XP_003201829	3224	1	1097.03	2836	0	136	748	2108	2720	0	0	564	594	0	613	LECNKKDWESESRKEIQQHQETCEMLQSEKKELLTQLEGSQKLYSESQNEQQKLESEIRSLKDQLADLQSSFTSCELVREELESIVKQQENSIQSFKFNCEQLEADLQASKNLTNKLHEETSAKDQKIISLLSAKEEAVTAALSELQQQHSEDITLLERRLSKEEEDKKALEIEKSKLNDKLDHLTEKMKIVREGSKQQKVQLDSFTKSMASLQDDRDRILREYKQLEERHLVIILEKDQIIQEAAAENNKLKEE	LECNKKDWESESRREIQQHQETCEMLQAEKKELLTQLEGSQKLYSESQDEQQKLESEIRSLKDQLADLQSSFARCELVRGELESMVKQQENSIQNFKFSCEQLEADLQASKDLTNKLHEETSAKDQKIVTLLSAKEEAVTAALSELQQQHSEDITLLERRLSKEEEDKKALEIEKSKLNDKLDHLTEKMKIIREEGKQQKAQLDSFTKSMSSLQDDRDRILREYKQLEERHLVIILEKDQIIQEAAAENNKLKEE	LECNKKDWESESR+EIQQHQETCEMLQ+EKKELLTQLEGSQKLYSESQ+EQQKLESEIRSLKDQLADLQSSF CELVR ELES+VKQQENSIQ+FKF+CEQLEADLQASK+LTNKLHEETSAKDQKI++LLSAKEEAVTAALSELQQQHSEDITLLERRLSKEEEDKKALEIEKSKLNDKLDHLTEKMKI+RE KQQK QLDSFTKSM+SLQDDRDRILREYKQLEERHLVIILEKDQIIQEAAAENNKLKEE
329844	Query_194	2-contig_12520_1	2151	gi|326910955|ref|XP_003201829.1|PREDICTED: Golgin subfamily B member 1-like [Meleagris gallopavo]	XP_003201829	3224	1	2684.44	6957	0	410	2066	425	2084	0	0	1431	1525	3	1660	AGADGFPNGGEQFTEENCPSGIRESLAAEKQEELSVLLLELKEAHEEIAFLKGQLRDPNIQTSAVNQSGGEANQLEGNSQVRLLGREEQKASDTQNELDNSLLWREAEMQQINALQENKTGLQDVHQETSVHGTGVMGATQESSAAVPEPGTFPSQELIDLRNQITELQMTLQKSEESYQKDLGERDAEINRLNRLAEEHRKKMEDSDSMFCALAEERDQLLCQVKDLSTMTELQEQVKQLEEDLALSEKQRLSD	ARADGFPNGGEQFTEEYCPSGIGECLAAEKQKELSVLLLELKKAQEEIAFLKGQLKDPNNQTCAVNQAGGEANQLEENSQTWLLEMEEQKVSSTQNELDSSSLQRETEIQPINVLPENRADLQEVPQETFVHGTGEMGATQETSAALPEPGSSRSQELINLQNRTAELQMILQKSEESYKKDLGERDAEIKRLNQLAEEYRKKMEDSDSSFCALAEERDQLLCQVKNLSAVTELQEKVKQLEEDLALSEKQRLSD	A ADGFPNGGEQFTEE CPSGI E LAAEKQ+ELSVLLLELK+A EEIAFLKGQL+DPN QT AVNQ+GGEANQLE NSQ LL EEQK S TQNELD+S L RE E+Q IN L EN+ LQ+V QET VHGTG MGATQE+SAA+PEPG+ SQELI+L+N+ ELQM LQKSEESY+KDLGERDAEI RLN+LAEE+RKKMEDSDS FCALAEERDQLLCQVK+LS +TELQE+VKQLEEDLALSEKQRLSD
327692	Query_631	56-contig_6490_1	990	gi|326911084|ref|XP_003201892.1|PREDICTED: transcription initiation factor TFIID subunit 3-like [Meleagris gallopavo]	XP_003201892	911	1	766.918	1979	0	11	557	160	708	0	0	534	540	2	549	QVPTDGGTSAEAMQVPLEEEGDMEEDEAINDENYLSKRPLESPDAEEFPPMKRPKLSVSKGDTLDGALEPREPLSSINTQKVPPMLSPVHVQDSTDLAPPSPEPPMLAPIAKSQVPTPKTVESKPVAPKTKSKTSSPGQKTKSPKTTPSPVVAGSPIRSPKTGSKEKKSPGRAKSPKSPKSPKAPVHVPQPPVKPETPSRTPLAALSDKIGKENIQVKQGQTPPEPVTKPNIENQTKKLPVMDKTIDDSIDAVIA	QVPTDGGTSAEAMQVPLEEEGDMEEDEAINDENYLSKRPLESPDAEEFPPMKRPKLSVSKGDALDGALEPREPLSSINTQKVPPMLSPVHVQDSTDLAPPSPEPPMLAPIAKSQVPTPKTLESKPLAPKTKSKTSSPGQKTKSPKTTPSPVVAGSPIRSPKTGSKEKKSPGRAKSPKSPKSPKAPVHVPPPPVKPETPSRTPLAALSDKIGKENIQVKQGQTPPEPVNKPNIENQTKKLPVMDKTIDDSIDAVIA	QVPTDGGTSAEAMQVPLEEEGDMEEDEAINDENYLSKRPLESPDAEEFPPMKRPKLSVSKGD LDGALEPREPLSSINTQKVPPMLSPVHVQDSTDLAPPSPEPPMLAPIAKSQVPTPKT+ESKP+APKTKSKTSSPGQKTKSPKTTPSPVVAGSPIRSPKTGSKEKKSPGRAKSPKSPKSPKAPVHVP PPVKPETPSRTPLAALSDKIGKENIQVKQGQTPPEPV KPNIENQTKKLPVMDKTIDDSIDAVIA
132919	Query_695	274-contig_45_1	497	gi|326911092|ref|XP_003201896.1|PREDICTED: metabotropic glutamate receptor 3-like [Meleagris gallopavo]	XP_003201896	889	1	742.265	1915	0	104	454	450	800	0	0	351	351	0	351	FTAPFNPPNAADSTVKFDAYGDGIGRYNVFNFQYTGDRYSYVKVGHWAETLSLEVDSIHWSKSSVPVSQCSDPCAPNEMKNMQPGDVCCWICIPCETYEYLADEFTCADCGPGKWPTADLTGCYDLPEDYIKWEDAWAIGPVTIACLGFICTFLVIAVFIKHNNTPLVKASGRELCYILLFGVFLSYSMTFFFIAKPSPAICTLRRLGLGSSFAVCYSALLTKTNCIARIFDGVKNGAQRPKFISPSSQVFICLS	FTAPFNPPNAADSTVKFDAYGDGIGRYNVFNFQYTGDRYSYVKVGHWAETLSLEVDSIHWSKSSVPVSQCSDPCAPNEMKNMQPGDVCCWICIPCETYEYLADEFTCADCGPGKWPTADLTGCYDLPEDYIKWEDAWAIGPVTIACLGFICTFLVIAVFIKHNNTPLVKASGRELCYILLFGVFLSYSMTFFFIAKPSPAICTLRRLGLGSSFAVCYSALLTKTNCIARIFDGVKNGAQRPKFISPSSQVFICLS	FTAPFNPPNAADSTVKFDAYGDGIGRYNVFNFQYTGDRYSYVKVGHWAETLSLEVDSIHWSKSSVPVSQCSDPCAPNEMKNMQPGDVCCWICIPCETYEYLADEFTCADCGPGKWPTADLTGCYDLPEDYIKWEDAWAIGPVTIACLGFICTFLVIAVFIKHNNTPLVKASGRELCYILLFGVFLSYSMTFFFIAKPSPAICTLRRLGLGSSFAVCYSALLTKTNCIARIFDGVKNGAQRPKFISPSSQVFICLS
360455	Query_609	110-contig_1690_1	1180	gi|326911216|ref|XP_003201957.1|PREDICTED: phosphatidylinositol-4,5-bisphosphate 3-kinase catalytic subunit gamma isoform-like [Meleagris gallopavo]	XP_003201957	1106	1	1290.02	3337	0	165	785	1	621	0	0	613	618	0	621	MELGDYEQPVVMREENKRRRRRMKPHCTSSNLSSMELISIEFILPTSNKHTKVPEMLLLEIAGNCTVEQMKAQIWMRAMEMSQTTDFYHAFTPDQFVLQYQKKGQWYEIYDKHQLLQTLDCILYWKVLQKKVGKIYVVQKQKPSEEVQEFQRQLNDLIGYDVTDVSNVHDDELEFTRRRLVTPRMIEVACRDPKLYAMHPWTTSKPLPEYLFKKITNNNIFIIIHRGTTSQKIKVSIDDTPDMILQSFFTKMAKK	MELGDYEQPVVMREENKRRRRRMKPHCTSSNLSSMELISIEFILPTSNKHTKVPEMMLLEIAGNCTVEQMKAQIWMRAIEMSQTTDFYHAFTPDQFVLQYQKKGQWYEIYDKHQLLQTLDCILYWKVLQKKVGKIYVVQKQKPSEEVQEFQRQLNDLIGYDVTDVSNVHDDELEFTRRRLVTPRMIEVACRDPKLYAMHPWTTSKPLPEYLFKKITNNNIFIIIHRGTTSQKIKVSIDDTPDMILHSFFTKMAKK	MELGDYEQPVVMREENKRRRRRMKPHCTSSNLSSMELISIEFILPTSNKHTKVPEM+LLEIAGNCTVEQMKAQIWMRA+EMSQTTDFYHAFTPDQFVLQYQKKGQWYEIYDKHQLLQTLDCILYWKVLQKKVGKIYVVQKQKPSEEVQEFQRQLNDLIGYDVTDVSNVHDDELEFTRRRLVTPRMIEVACRDPKLYAMHPWTTSKPLPEYLFKKITNNNIFIIIHRGTTSQKIKVSIDDTPDMIL SFFTKMAKK
324289	Query_495	141-contig_6567_1	1506	gi|326911220|ref|XP_003201959.1|PREDICTED: probable G-protein coupled receptor 22-like [Meleagris gallopavo]	XP_003201959	433	1	762.296	1967	0	538	917	1	380	0	0	375	378	0	380	MCFSPILEGNMQFESNFTVRDAVDDIDTNMYRPLSYALSFQVSLTGFLMLEIVLGLGSNLTVLVLYCMKSNLINSVSNIITMNLHVLDVIICVGCIPLTIVILLLSLESNTALICCFHEACVSFASVSTAINVFAITLDRYDISVKPANRILTMGRAVILMTSIWIISLFAFLIPFIEVNFFSLQSASTWENKTLLCVSANEYHTELGMYYHLLVQIPIFFFTVVVMLITYTKILQALNIRIGTRFTTGQKKKGR	MCFSPILEGNMQFESNFTVRDAIDDIDTNMYRPLSYALSFQVSLTGFLMLEIVLGLGSNLTVLVLYCMKSNLINSVSNIITMNLHVLDVIICVGCIPLTIVILLLSLESNTALICCFHEACVSFASVSTAINVFAITLDRYDISVKPANRILTMGRAVILMTSIWIISLFAFLIPFIEVNFFSLQSASTWENKTLLCVSANEYHTELGMYYHLLVQIPIFFFTVVVMLITYTKILQALNIRIGTRFTTGQKKKAR	MCFSPILEGNMQFESNFTVRDA+DDIDTNMYRPLSYALSFQVSLTGFLMLEIVLGLGSNLTVLVLYCMKSNLINSVSNIITMNLHVLDVIICVGCIPLTIVILLLSLESNTALICCFHEACVSFASVSTAINVFAITLDRYDISVKPANRILTMGRAVILMTSIWIISLFAFLIPFIEVNFFSLQSASTWENKTLLCVSANEYHTELGMYYHLLVQIPIFFFTVVVMLITYTKILQALNIRIGTRFTTGQKKK R
290722	Query_74	15-contig_22583_1	487	gi|326911262|ref|XP_003201980.1|PREDICTED: alpha-1,2-glucosyltransferase ALG10-A-like, partial [Meleagris gallopavo]	XP_003201980	459	1	642.884	1657	0	78	427	109	458	0	0	323	338	0	350	AVSGFQRILSSLTLATFPTLYFFTFLYYTDTGSVFFTLFAYLMCLYGNHKASALLGFCAFMFRQTNIVWTLFCAGNVVAEKLNEAWKTELLKKRDERISSTRTSFSDLPVITRFLIEYLLLPKNLITLITLTWPYIILVIAFIVFVFINGGIVVGDRSSHEACLHFPQLFYFLSFTLFFSFPHLLTPAKIRKFLQSLRRHRVQYCLLTAISLFLVWKFTYVHKYLLADNRHYTFYVWRKIFQRHELIKYALVPAY	AVSGFQRILSSLTLATFPTLYFFTFLYYTDTGSVFFTLFAYLMCLYGNHKASALLGFCAFMFRQTNIVWTVFCAGNVVAEKLNEAWKTELLKKKDERISSMRTSFSDLTLITRFLIEYLVSPKNLITLIALTWPYIVLVTAFFGFVFVNGGIVVGDRSSHEACLHFPQLFYFLSFTLFFSFPHLLTPTKVRKFLQSLRRHRVQYILITAISLFLIWKFTYVHKYLLADNRHYTFYVWRKIFQRHELVKYVLVPAY	AVSGFQRILSSLTLATFPTLYFFTFLYYTDTGSVFFTLFAYLMCLYGNHKASALLGFCAFMFRQTNIVWT+FCAGNVVAEKLNEAWKTELLKK+DERISS RTSFSDL +ITRFLIEYL+ PKNLITLI LTWPYI+LV AF FVF+NGGIVVGDRSSHEACLHFPQLFYFLSFTLFFSFPHLLTP K+RKFLQSLRRHRVQY L+TAISLFL+WKFTYVHKYLLADNRHYTFYVWRKIFQRHEL+KY LVPAY
161186	Query_505	38-contig_4239_1	1116	gi|326911302|ref|XP_003201999.1|PREDICTED: zinc finger protein 800-like [Meleagris gallopavo]	XP_003201999	699	1	1018.45	2632	0	186	715	115	644	0	0	519	523	0	530	LPDINDKQSQAISDLLEAIYPRVDKQEYIVKLEPIETNQNAVFQYVSRTDSPDENTESSSTPDQAPVAIQEPSAEPPKAVSAPAPVGEAVELPPADPVTNKATPAPEEQPPAVTPEVDSLDNSDFGHQLICCLCRKEFHSRRSVRRHIRKVHKKKMEELKKYIETKKKPSLCSAKGRNKNVLVALGRSCPVCYKSFATKANVRRHFDEVHRGLRRDSITPDIATKPGQPLFLDTVSAKKSFKTRKQKSSSKAEYN	LPDINDKQSQAISDLLEAIYPRVDKQEYIVRLDPIETNQNAVFQYVSRTDSPDENTESSSAPDQAPVPIQEPSTEPPKAVSAPAPVGETVELPPADPVTNKLTPTPEEQPPAVTPEVDSLDNSDFGHQLICCLCRKEFHSRRSVRRHIRKVHKKKMEELKKYIETKKKPNLCSAKGRNKNVLVALGRSCPVCYKSFATKANVRRHFDEVHRGLRRDSITPDIATKPGQPLFLDTVSAKKSFKTRKQKSSSKAEYN	LPDINDKQSQAISDLLEAIYPRVDKQEYIV+L+PIETNQNAVFQYVSRTDSPDENTESSS PDQAPV IQEPS EPPKAVSAPAPVGE VELPPADPVTNK TP PEEQPPAVTPEVDSLDNSDFGHQLICCLCRKEFHSRRSVRRHIRKVHKKKMEELKKYIETKKKP+LCSAKGRNKNVLVALGRSCPVCYKSFATKANVRRHFDEVHRGLRRDSITPDIATKPGQPLFLDTVSAKKSFKTRKQKSSSKAEYN
223177	Query_611	16-contig_9661_1	1270	gi|326911459|ref|XP_003202076.1|PREDICTED: AT-rich interactive domain-containing protein 2-like [Meleagris gallopavo]	XP_003202076	1831	1	1674.06	4334	0	206	1146	645	1587	0	0	917	921	2	943	VGNHYQRTPINQSSTLAATQMSFPMQGVHTVAQTVSRIPQNTVHAQQQNAPVTVIQNKGPIPGEVVKATVIQSSVPQSGVPVTIAVGGAPQASNQNHSSTGPQPSVTVVGSQTLLHHQPVIQQQSPLHAVVPGQIPSGTPVTVIQQAVPQGHIFGRVQNIPACSSAVSQGQQLISTSSQPGQS-SQQSSTGNQQQDTVIIAPQQYVTTSASNIVSATTVQNFQVAPGQVVAIAGVQNPPTSRVGFQNIAPKPLPS	VGNHYQRTPINQSSTLTATQMSFPIQGVHTVAQTVSRIPQNTVHAQQQNAPMTVIQNKGPIPGEVVKATVIQSSVPQSGVPVTIAVGGAPQASNQNHSSTGPQPSVTVVGSQTLLHHQPVIQQQSPLHAVVPGQIPSGTPVTVIQQAVPQGHIFGRVQNIPACSSAVSQGQQLISTSSQPGQSPSQQSSTANQQQDTVIIAPQQYVTTSASNIVSATTVQNFQVAPGQVVAIAGVQNPPTSRVGFQNIAPKPLPS	VGNHYQRTPINQSSTL ATQMSFP+QGVHTVAQTVSRIPQNTVHAQQQNAP+TVIQNKGPIPGEVVKATVIQSSVPQSGVPVTIAVGGAPQASNQNHSSTGPQPSVTVVGSQTLLHHQPVIQQQSPLHAVVPGQIPSGTPVTVIQQAVPQGHIFGRVQNIPACSSAVSQGQQLISTSSQPGQS SQQSST NQQQDTVIIAPQQYVTTSASNIVSATTVQNFQVAPGQVVAIAGVQNPPTSRVGFQNIAPKPLPS
118026	Query_979	1-contig_30952_1	897	gi|326911624|ref|XP_003202157.1|PREDICTED: phosphotidylinositol phosphatase PTPRQ-like [Meleagris gallopavo]	XP_003202157	2212	1	658.292	1697	0	82	837	928	1634	0	0	397	493	93	778	LKKYTNYKMRVAASTVIGE-SALSEENDVFVRTPEDVPSSAPENVTYRNISSTEIELSFFPPSIPNGIIQTYTIYLKRTNGTEE---------RVINSTHLKYTEYMIEVSASTIMGEG-LRSAPLNILTDEEAPSSPPESLSVKQLSGVTVKLSWKPPVEPNGIILYYTVYVWNKTSKRSVNVTDTSLEFTDLENNSEYSAYVAASTRFGDGNIKSDTIIFRTSEGAPGDPPKDVMYRNLTSTSIMLFWSPPQK	LAKYSHYTLWLTASTAFGDGNKTSEIIDVY--TDQDIPDGPVENLVYQNISSSSVNVSWLPPSQPNGLVFFHVSLSLLQLGTNKILSFLTYNTSIIFDNLEKYTDYILKITPTTDKGSSELHALSLHIRTDEDVPESAPIIKTFSNLSTTSVMLSWDPPVKPSGIIISYDLNLFGSEKNVSFSTTNNFIILEDLVPSTLYSIYTAARTIKGSG--PSSVLHFYTDESVPLAPPQNLTITNYTADSVWLKWDPSPQ	L KY++Y + + AST G+ + SE DV+ T +D+P EN+ Y+NISS+ + +S+ PPS PNG++ + GT + +I KYT+Y+++++ +T G L + L+I TDE+ P S P + LS +V LSW PPV+P+GII+ Y + ++ S + T+ + DL ++ YS Y AA T G G S + F T E P PP+++ N T+ S+ L W P +
94162	Query_1071	7-contig_23744_1	1268	gi|326911650|ref|XP_003202170.1|PREDICTED: polypeptide N-acetylgalactosaminyltransferase 4-like [Meleagris gallopavo]	XP_003202170	579	1	1134.4	2933	0	662	1210	10	558	0	0	536	543	0	549	RSCALLGFLTVAYFALELSVSSFGGSLSGESISKGKWERRFTDGAEEAVDLARPVYDKSPPDSYAPGEWGKPARLQLSPEEKKQEAELIDKYAINIYLSDKISLHRHIEDNRLSGCKAKSYNYRKLPTTSVVIAFYNEAWSTLLRTVHSVLETSPSVLLKEIILVDDLSDKVYLKTDLEKYISGLKRVRLIRTNKREGLVRARLIGATFATGDVLTFLDCHCECVSGWLEPLLERIAENETVVICPVIDTIDWNT	RSCALLGFLMVAYFALELSVSSFGVSLAGESISKGKWERRFTDGAEEAVDLARPVYDKSPPDSYAPGEWGKPTRLQLSPEEKKQEAELIDKYAINIYLSDKISLHRHIEDNRMSGCKTKSYNYRKLPTTSVVIAFYNEAWSTLLRTVHSVLETSPSVLLKEIILVDDLSDKVYLKTDLEKYISSLKRVRLIRTNKREGLVRARLIGATFATGDVLTFLDCHCECVSGWLEPLLERIAENETVVICPVIDTIDWNT	RSCALLGFL VAYFALELSVSSFG SL+GESISKGKWERRFTDGAEEAVDLARPVYDKSPPDSYAPGEWGKP RLQLSPEEKKQEAELIDKYAINIYLSDKISLHRHIEDNR+SGCK KSYNYRKLPTTSVVIAFYNEAWSTLLRTVHSVLETSPSVLLKEIILVDDLSDKVYLKTDLEKYIS LKRVRLIRTNKREGLVRARLIGATFATGDVLTFLDCHCECVSGWLEPLLERIAENETVVICPVIDTIDWNT
53517	Query_721	36-contig_3412_1	395	gi|326911891|ref|XP_003202289.1|PREDICTED: arf-GAP with dual PH domain-containing protein 1-like [Meleagris gallopavo]	XP_003202289	377	1	691.034	1782	0	1	351	1	375	0	0	333	342	24	375	MAGGDKNVKALREVWRRAENSVCADCGKPDPDWASSTLGVFICLSCSGIHRNIPSISKVKSLKMDHWDDAQVQFLAKHGNAVTKAMYEAHIPIYYYQPTYNDCQVLREQWIRAKYERKEFTEPGKQLPYTDGVKEGILWKRGRDSGQFQPRKFLLSEREGCLKYFTKQDAKEPKINVKIDVINATFQPEKIGNPNGLQITYLKDNKTRNIFVYHKSGKEVVDWFNAIRSVQFHYLKVAFPIASDNEIKSRLTRHF	MAGGDKSTKTLREVWRRAENSLCADCGKPDPDWASSTLGVFICLSCSGIHRNIPSISKVKSLKMDHWDDAQVQFLAKHGNAVTKSMYEAHIPIYYYQPTYNDCQVLREQWIRAKYERKEFTELGKQLLYTDGVKEGILWKRGRDSGQFQPRKFLLSEREGCLKYFTKQDAKEPKINVKIDVINATFQPEKIGNPNGLQITYLKDNKTRNIFVYHKSGKEVVDWFNAIRSVQFHYLKVAFPIASDNEIKSRLTRNF	MAGGDK+ K LREVWRRAENS+CADCGKPDPDWASSTLGVFICLSCSGIHRNIPSISKVKSLKMDHWDDAQVQFLAKHGNAVTK+MYEAHIPIYYYQPTYNDCQVLREQWIRAKYERKEFTE GKQL YTDGVKEGILWKRGRDSGQFQPRKFLLSEREGCLKYFTKQDAKEPKINVKIDVINATFQPEKIGNPNGLQITYLKDNKTRNIFVYHKSGKEVVDWFNAIRSVQFHYLKVAFPIASDNEIKSRLTR+F
170581	Query_1009	9-contig_11301_1	1196	gi|326911911|ref|XP_003202299.1|PREDICTED: inward rectifier potassium channel 4-like [Meleagris gallopavo]	XP_003202299	450	1	787.719	2033	0	615	989	7	381	0	0	374	375	0	375	SRYSIVSTEEDGHKVSALGSMNGHSRNGKGHTPRRKHRNRFVKKNGQCNVYFANLSNKSQRYMADIFTTCVDTRWRYMLMIFSAAFLVSWLFFGFLFWCIAFFHGDLNAPVVGGSPSLLKPCIMHVNSFLGAFLFSVETQTTIGYGFRCVTEECPLAIMAVVVQSIVGCVIDSFMIGTIMAKMARPKKRAQTLLFSHHAVISVRDGKLCLMWRVGNLRRSHIVEAHVRAQLIKPYMTEEGEYLPLDQRDLNVGYD	NRYSIVSTEEDGHKVSALGSMNGHSRNGKGHTPRRKHRNRFVKKNGQCNVYFANLSNKSQRYMADIFTTCVDTRWRYMLMIFSAAFLVSWLFFGFLFWCIAFFHGDLNAPVVGGSPSLLKPCIMHVNSFLGAFLFSVETQTTIGYGFRCVTEECPLAIMAVVVQSIVGCVIDSFMIGTIMAKMARPKKRAQTLLFSHHAVISVRDGKLCLMWRVGNLRRSHIVEAHVRAQLIKPYMTEEGEYLPLDQRDLNVGYD	+RYSIVSTEEDGHKVSALGSMNGHSRNGKGHTPRRKHRNRFVKKNGQCNVYFANLSNKSQRYMADIFTTCVDTRWRYMLMIFSAAFLVSWLFFGFLFWCIAFFHGDLNAPVVGGSPSLLKPCIMHVNSFLGAFLFSVETQTTIGYGFRCVTEECPLAIMAVVVQSIVGCVIDSFMIGTIMAKMARPKKRAQTLLFSHHAVISVRDGKLCLMWRVGNLRRSHIVEAHVRAQLIKPYMTEEGEYLPLDQRDLNVGYD
356463	Query_587	20-contig_5682_1	1622	gi|326912084|ref|XP_003202384.1|PREDICTED: ubinuclein-2-like, partial [Meleagris gallopavo]	XP_003202384	1200	1	915.22	2364	0	867	1385	550	1066	0	0	493	501	2	519	KLFIFLRFHSQDCSPKKEQKTCISSVNSSCATTLSVSAPVCTPSSSSCTPAPETICLDDSLDEDLSFHPPSLDSISDALAVINNGAKGSPLGSAIETPTSRPRPGLREEKLASIMSKLPLATSKKVEPTQTPHSSSLIAGHTGPVPKKPQDLVHTGISSGLIAGSSIQNPKVSLEPLPAKLLQQGLQRSSQIQAAAASSQTHVSVSSSKTQAAISTTSQRPKDANILVSSSEAQGGSSTSQMTKVHQHSAVQQKY	KVILAPKAKVKDSSPKKEQKTCISSVNSSCVTALSTGAPVCTPSSSSCTPAPETICLDDSLDEDLSFHPPSLDSISDALAVINNGAKGSPLGSTIETPTSRPRPGLREEKLASIMSKLPLATSKKVEPAQTPHSSSLIAGHTGPVPKKPQDLVHTGISSGLIAGSSIQNPKVSLEPLPAKLLQQGLQRSSQIQAAAASSQTHVS--SSKTQAAISTTSQRPKDANFLVSSSEVQGGSSTSQMTKVHQHSAIQQKY	K+ + + +D SPKKEQKTCISSVNSSC T LS APVCTPSSSSCTPAPETICLDDSLDEDLSFHPPSLDSISDALAVINNGAKGSPLGS IETPTSRPRPGLREEKLASIMSKLPLATSKKVEP QTPHSSSLIAGHTGPVPKKPQDLVHTGISSGLIAGSSIQNPKVSLEPLPAKLLQQGLQRSSQIQAAAASSQTHVS SSKTQAAISTTSQRPKDAN LVSSSE QGGSSTSQMTKVHQHSA+QQKY
201967	Query_406	12-contig_12650_1	636	gi|326912380|ref|XP_003202530.1|PREDICTED: interleukin-17 receptor A-like [Meleagris gallopavo]	XP_003202530	832	1	897.116	2317	0	144	627	348	831	0	0	447	467	0	484	RKVWIVYSADHLLYVDVVLKFAEFLMTVCGTAVALDLLEDHQISEFGPLPWLTRQKKEMEELSSKIIILCSRGTQAKWQAMLGSAPVCLRQDQQKPTGDLFTPALNLILPDFKKPACFGMYIVCYFDGISSEKDIPDLFNVTSRYQLMDKFEDIYFRIQDLEKFEPGRIHRIQEITAENYTDTPSGRKLKEAVQKFKNWQIEHPNWFEAESVSMDSDEELQSLNRESQVDSLLSEPGGIVKHELHLQEPDPNCLY	RKVWIVYSADHLLYVDVVLKFAEFLMTVCGTAVALDLLEDHQISEFGPLPWLTRQKKEMEELSSKIIILCSRGTQAKWQAMLGSAPVCLKQDQQKPTGDLFTPALNLILPDFKKPACFGMYIVCYFDGISSEKDIPDLFNVTSRYQLMDKFEDIYFRIQDLEKFEPGRIHRIQEITAENYIDTPSGRKLKEAVQKFRNWQIDHPNWFEAESISLDNDEELQSLNRESQMDSLLSEPGGIVKHQLHLREPDPNCCY	RKVWIVYSADHLLYVDVVLKFAEFLMTVCGTAVALDLLEDHQISEFGPLPWLTRQKKEMEELSSKIIILCSRGTQAKWQAMLGSAPVCL+QDQQKPTGDLFTPALNLILPDFKKPACFGMYIVCYFDGISSEKDIPDLFNVTSRYQLMDKFEDIYFRIQDLEKFEPGRIHRIQEITAENY DTPSGRKLKEAVQKF+NWQI+HPNWFEAES+S+D+DEELQSLNRESQ+DSLLSEPGGIVKH+LHL+EPDPNC Y
380100	Query_841	2-contig_4678_1	5854	gi|326912802|ref|XP_003202735.1|PREDICTED: basic helix-loop-helix domain-containing protein KIAA2018-like [Meleagris gallopavo]	XP_003202735	2237	1	2055.8	5325	0	3	1084	950	2037	0	0	1048	1061	6	1088	KVAGASAVESSAA------GETSTSGTTSESCNVPQSSSVVMQDVDLLEGQGLTKMLSDLTKERTVVEKSSSFAVQGEHSNFPMENSKSVESSVDLPEKQELLLMNTEGDALSQHHTCVSDQEVVSAALIASRQADSPMSTSSGSSRGFSVASMLPDTTREDVTSNTSTSTCNNCTFSEQPDIVALAARAIFDQESLEKSGGGMQVNMRDAISKSTEVATLEREQQTFKALPVKESNAGPLETASNKFSAQDTVQ	QVSGASAVESSTACQTSTAGQTSTAGTTSESCNVPQGSSVVMQDVDLLEGQGLTKMLSDLTKERTAVEKSSSFAVQGEHSNFPMENSKSGKSTFDSTEKQELLLMNTEGDALSQHHTCVSDQEVVSAALIASRQADSPMSTSSGSSRGFSVASMLPDTTREDVTSNTSTSTCNNCTFSEQPDIVALAARAIFDQESLEKSGGGMQVNMRDAIPKSTEVATLEREQQTFKALPVKESNAGPLETASNKFSAQDAVQ	+V+GASAVESS A G+TST+GTTSESCNVPQ SSVVMQDVDLLEGQGLTKMLSDLTKERT VEKSSSFAVQGEHSNFPMENSKS +S+ D EKQELLLMNTEGDALSQHHTCVSDQEVVSAALIASRQADSPMSTSSGSSRGFSVASMLPDTTREDVTSNTSTSTCNNCTFSEQPDIVALAARAIFDQESLEKSGGGMQVNMRDAI KSTEVATLEREQQTFKALPVKESNAGPLETASNKFSAQD VQ
6897	Query_850	4-contig_25612_1	1552	gi|326912880|ref|XP_003202773.1|PREDICTED: hypothetical protein LOC100548324 [Meleagris gallopavo]	XP_003202773	1424	1	2453.71	6358	0	67	1551	34	1424	0	0	1258	1300	96	1486	IPYVLKSCAEFIETHGIVDGIYRLSGVTSNIQKLRQEFVSDQCPDLTREVYLQDIHCVGSLCKLYFRELPNPLLTYELYKKFTLTGNTVRYRKGRNKKDRIPEEQKNRYQSVHEAVSRFPEDEQLARIQNVIQELPPSHYRTLEYLIKHLTHLASFSSMTNMHTRNLALVWAPNLLRSKEIEAVGCNGDAAFLEVRVQQLVIEFILNHVDQIFSNNRKASSAESIENAPVVKNLTHPSTSLPMKLVSLEEAQARS	VPYVLKSCAEFIETHGIVDGIYRLSGVTSNIQKLRQEFVSDQCPDLTREVYLQDIHCVGSLCKLYFRELPNPLLTYELYKKFT------------------------------EAVSRFPEDEQLARIQNVIQELPPSHYRTLEYLIKHLTHLASFSSMTNMHTRNLALVWAPNLLRSKEIEAVGCNGDAAFLEVRVQQLVIEFILNHVDQIFSNSRKASSAESIENAPVVKNLTHPSTSLPMKLVSLEEAQARS	+PYVLKSCAEFIETHGIVDGIYRLSGVTSNIQKLRQEFVSDQCPDLTREVYLQDIHCVGSLCKLYFRELPNPLLTYELYKKFT EAVSRFPEDEQLARIQNVIQELPPSHYRTLEYLIKHLTHLASFSSMTNMHTRNLALVWAPNLLRSKEIEAVGCNGDAAFLEVRVQQLVIEFILNHVDQIFSN+RKASSAESIENAPVVKNLTHPSTSLPMKLVSLEEAQARS
286994	Query_406	2-contig_6762_1	530	gi|326913030|ref|XP_003202845.1|PREDICTED: pleckstrin homology-like domain family B member 2-like [Meleagris gallopavo]	XP_003202845	1258	1	863.988	2231	0	84	511	18	445	0	0	420	422	0	428	LGKGSVVNSLENGLQDIMENLNTKKYSSSLKFKTNGDYAGSYLTLSQPMTAKPSPSASVKNIHSVTKIQGGKLFPCESPYLPDKSFSVKHLSSLSGTSPSLSGYNLGRTDFDIHASRENEKALGHADKFYYSKYSQKNKSYDNVYLPGMLDTKKISGSLLTMWNGSSGSELMLSPVSNSGAASMPSSPKQGRRMNIEDGLALHAKPVKHKDVMMETLASRPRKYSGGSLSHMGMYSRSLPRLHKSTESQLMPLSL	LGKGSVVNSLENGLQDIMENLNTKKYSSSLKFKTNGDCAGSYLTLSQPMMAKPSPSTSVKNIHSVTKIQGGKLFPCESPYLPDKSFSVKHLSSLSATSPSLSGYNLGRTDFDIHANRENEKALGHTDKFYYSKYSQKNKSYDNVYLPGMLDTKKISGSLLTMWNGSSGSELMLSPVSNSGAASMPSSPKQGRRMNIEDGLALHAKPVKHRDVMMETLASRPRKYSGGSLSHMGMYSRSLPRLHKSTESQLMPLSL	LGKGSVVNSLENGLQDIMENLNTKKYSSSLKFKTNGD AGSYLTLSQPM AKPSPS SVKNIHSVTKIQGGKLFPCESPYLPDKSFSVKHLSSLS TSPSLSGYNLGRTDFDIHA+RENEKALGH DKFYYSKYSQKNKSYDNVYLPGMLDTKKISGSLLTMWNGSSGSELMLSPVSNSGAASMPSSPKQGRRMNIEDGLALHAKPVKH+DVMMETLASRPRKYSGGSLSHMGMYSRSLPRLHKSTESQLMPLSL
22267	Query_150	52-contig_2748_1	934	gi|326913324|ref|XP_003202989.1|PREDICTED: ATP-sensitive inward rectifier potassium channel 15-like, partial [Meleagris gallopavo]	XP_003202989	431	1	644.81	1662	0	286	597	52	363	0	0	310	311	0	312	TEAVRMEATQINMSRVPLVNGGISTALKAHKPRVMSKSGHSNVRIDKVDGIYLLYLQDLWTTVIDMKWRYKLTLFAATFVMTWFLFGVIYYAIAFLHGDLEINKFTSKQEPCVKNVDSLTGAFLFSLESQTTIGYGFRFITEECPHAIFLLVAQLVITTLIEIFITGTFLAKIARPKKRAETIKFSHCAVITKHNGELCLVIRVANMRKSLLIQCQLSGKLLQTYETKEGERILLNQASVKFNVDSSSESPFLIL	TEAVRMEATQINMSRVPLVNGGISTVLKAHKPRVMSKSGHSNVRIDKVDGIYLLYLQDLWTTVIDMKWRYKLTLFAATFVMTWFLFGVIYYAIAFLHGDLEINKFTSKREPCVKNVDSLTGAFLFSLESQTTIGYGFRFITEECPHAIFLLVAQLVITTLIEIFITGTFLAKIARPKKRAETIKFSHCAVITKHNGELCLVIRVANMRKSLLIQCQLSGKLLQTYETKEGERILLNQASVKFNVDSSSESPFLIL	TEAVRMEATQINMSRVPLVNGGIST LKAHKPRVMSKSGHSNVRIDKVDGIYLLYLQDLWTTVIDMKWRYKLTLFAATFVMTWFLFGVIYYAIAFLHGDLEINKFTSK+EPCVKNVDSLTGAFLFSLESQTTIGYGFRFITEECPHAIFLLVAQLVITTLIEIFITGTFLAKIARPKKRAETIKFSHCAVITKHNGELCLVIRVANMRKSLLIQCQLSGKLLQTYETKEGERILLNQASVKFNVDSSSESPFLIL
310202	Query_564	3-contig_25796_1	895	gi|326913509|ref|XP_003203080.1|PREDICTED: kelch-like protein 15-like [Meleagris gallopavo]	XP_003203080	604	1	666.381	1718	0	17	333	230	546	0	0	312	313	0	317	SGLFLLVKTSEFYRYSRQLRHEVDQAMNYFHSVHQQPLMEMKSNKIRSAKPQTAVFRGMIGHSMVNSKILLLHKPRVWWELEGPQVPLRPDCLAIVNNFVFLLGGEELGPDGEFHASSKVFRYDPRQNTWLRMADMSVPRSEFAVGVIGRYVYAVAGRTRDETFYSTERYDITEDKWEFVDPYPVNKYGHEGTVLGNKLYITGGITSSSTSKQVCVFDPSKEGTVEQRTRRTQVVTNCWENKCKMNYARCFHKMI	SSVFEKVKTSEFYRYSRQLRHEVDQAMNYFHSVHQQPLMEMKSNKIRSAKPQTAVFRGMIGHSMVNSKILLLHKPRVWWELEGPQVPLRPDCLAIVNNFVFLLGGEELGPDGEFHASSKVFRYDPRQNTWLRMADMSVPRSEFAVGVIGRYVYAVAGRTRDETFYSTERYDITEDKWEFVDPYPVNKYGHEGTVLGNKLYITGGITSSSTSKQVCVFDPSKEGTVEQRTRRTQVVTNCWENKCKMNYARCFHKMI	S +F VKTSEFYRYSRQLRHEVDQAMNYFHSVHQQPLMEMKSNKIRSAKPQTAVFRGMIGHSMVNSKILLLHKPRVWWELEGPQVPLRPDCLAIVNNFVFLLGGEELGPDGEFHASSKVFRYDPRQNTWLRMADMSVPRSEFAVGVIGRYVYAVAGRTRDETFYSTERYDITEDKWEFVDPYPVNKYGHEGTVLGNKLYITGGITSSSTSKQVCVFDPSKEGTVEQRTRRTQVVTNCWENKCKMNYARCFHKMI
67616	Query_384	41-contig_2384_1	1139	gi|326913886|ref|XP_003203263.1|PREDICTED: probable JmjC domain-containing histone demethylation protein 2C-like [Meleagris gallopavo]	XP_003203263	2383	1	798.89	2062	0	5	441	212	647	0	0	411	418	7	440	AENPKNKNKHFLSKRRKPEEDEKKLNMKRLRADNISDYSESSDSEISNKRLTDSSSEQNSENELKSKNTSKINGEEGKSQTAERVEQTLTDRRSPWDEVQEDKKREEPERLKSSLLDQQEKPSLHAAEQPTPYEQNSKDAHIQECNAEKRSAAELKNEQFVPKPPTPKSIIDKTNKNNSEKESQENAASTFGLQTVQKIESHSSDLKQQFANANFLEARKQEADPNWVSCVVNKADLVQPGVVKALPVNEHLNPE	GENPKNKNKHFLSKRRKPEEDEKKLNMKRLRTDNISDYSESSDSEISNKRLTDSSSEQNSENELKSKNTSKINGEEGKSQTVERVEQPLTDRRSPWDEVQEDKKREEPERLKSSLLDQQEKPLLHAAEQPTPYEQNSKDPHVQECNAEKHHAAELKNEQFVPKPPTPKSIVDKTSKNNSEKESQDNAASTFGLQTVPKIESHSSDLKQQFANANFLEARKQEADQSWVSCVVNKMDLIQPGVVKALPVNEHLNPE	ENPKNKNKHFLSKRRKPEEDEKKLNMKRLR DNISDYSESSDSEISNKRLTDSSSEQNSENELKSKNTSKINGEEGKSQT ERVEQ LTDRRSPWDEVQEDKKREEPERLKSSLLDQQEKP LHAAEQPTPYEQNSKD H+QECNAEK AAELKNEQFVPKPPTPKSI+DKT+KNNSEKESQ+NAASTFGLQTV KIESHSSDLKQQFANANFLEARKQEAD +WVSCVVNK DL+QPGVVKALPVNEHLNPEK
354481	Query_611	42-contig_2384_1	2175	gi|326913886|ref|XP_003203263.1|PREDICTED: probable JmjC domain-containing histone demethylation protein 2C-like [Meleagris gallopavo]	XP_003203263	2383	1	1120.92	2898	0	684	1336	830	1476	0	0	599	618	6	653	ELERKAFIEPLRSATTAPIKTELEPSRTQAAKESHVHRHFADPVLNQLPRPPQETGERLSKYKEEHRRILQESIEVAPFTAKIKALEGERENYSRVASLSSSPKSHSVKYDKDAERSMSELYKMKHSVPQSLPQSNYFTTLSNSVVNEPPRSYPSKEASSTYVDKQTNCPSTAANPQSLPSYISSLSKPPPLIKHQPESEGSVSKVPEQLSQSVQSHSVGSFRSDSRSPTQLSVSSSNTLRSMPALHRAPVFHPP	ELERKAFIEPLRSATTAPIKTELEQSRTQAAKESHMHRHFADPVLNQLPRPPQETGERLSKYKEEHRRILQESIEVAPFTAKIKALEGERENYSRVTSLSSSPKSHSVKYDKDAERSVSELYKMKHSVPQSLPQSNYFTTLSNSVVNEPPRSYPSKEASSAYVDKQTSCPSTAASPQSLPSYVSSLSKPPPLIKHQPESEGSASKVPEQLSQSVQSHSVGCFRSDSRSPTQLSVSSSNTLRSMPALHRAPVFHPP	ELERKAFIEPLRSATTAPIKTELE SRTQAAKESH+HRHFADPVLNQLPRPPQETGERLSKYKEEHRRILQESIEVAPFTAKIKALEGERENYSRV SLSSSPKSHSVKYDKDAERS+SELYKMKHSVPQSLPQSNYFTTLSNSVVNEPPRSYPSKEASS YVDKQT+CPSTAA+PQSLPSY+SSLSKPPPLIKHQPESEGS SKVPEQLSQSVQSHSVG FRSDSRSPTQLSVSSSNTLRSMPALHRAPVFHPP
117476	Query_731	15-contig_18733_1	954	gi|326913970|ref|XP_003203304.1|PREDICTED: SLIT and NTRK-like protein 6-like [Meleagris gallopavo]	XP_003203304	839	1	1578.53	4086	0	50	858	1	808	0	0	768	786	1	809	MKLWIFMVYSVLVASDPFQSETSFSRVRGSCQSLCSCEEKDDIMIINCEERGIKMVSEINVPPSRPFHLNLLNNGLTMLRVNDFAGLVNAISLHLGFNNIADIEPGAFNGLSFLKQLHINHNSLEILKEDTFDGLENLEFLQADNNFITVIEASAFSKLSRLKVLILNDNAIEYLPPNIFRFVPLTHLDLRGNQLQTLPYVGFLEHIGRILDLQLEDNKWACNCDLLQLKTWLENMPPQSIIGDVVCNSPPVIKG	MKLWIFVVCSVLVASDPFQSETSFTRIRGSCQSLCSCEEKDGTMIINCEERGIKMVSEINVPPSRPFHLNLLNNGLTVLHVNDFAGLVNAISLHLGFNNIADIEPGAFNGLNLLKQLHINHNSLEILKEDTFDGLENLEFLQADNNFITVIEASAFSKLSRLKVLILNDNAIEYLPPNIFRFVPLTHLDLRGNQLQTLPYVGFLEHIGRILDLQLEDNKWACNCDLLQLKTWLENMPPQSIIGDVVCNSPPVIKG	MKLWIF+V SVLVASDPFQSETSF+R+RGSCQSLCSCEEKD MIINCEERGIKMVSEINVPPSRPFHLNLLNNGLT+L VNDFAGLVNAISLHLGFNNIADIEPGAFNGL+ LKQLHINHNSLEILKEDTFDGLENLEFLQADNNFITVIEASAFSKLSRLKVLILNDNAIEYLPPNIFRFVPLTHLDLRGNQLQTLPYVGFLEHIGRILDLQLEDNKWACNCDLLQLKTWLENMPPQSIIGDVVCNSPPVIKG
387314	Query_332	1-contig_21226_1	599	gi|326914236|ref|XP_003203432.1|PREDICTED: neurobeachin-like, partial [Meleagris gallopavo]	XP_003203432	1698	1	1112.44	2876	0	54	598	871	1415	0	0	540	541	0	545	ILTEQVCTQVVHKPHPEPDSTVKIQNPMILKVVATLLKNSTPSAELMEVRRLFLSDMIKLFSNSRENRRCLLQCSVWQDWMFSLGYINPKNSEEQKITEMVYNIFRILLYHAIKYEWGGWRVWVDTLSIAHSKVTYEAHKEYLAKMYEEYQRQEEENIKKGKKGNVSTISGLSSQTTGAKGGMEIREIEDLSQSQSPESETDYPVSTDTRDLLMATKVSDDVLGSAERQGGGVHVEVHDLLVDIKAEKVEATEVK	ILTEQVCTQVVHKPHPEPDSTVKIQNPMILKVVATLLKNSTPSAELMEVRRLFLSDMIKLFSNSRENRRCLLQCSVWQDWMFSLGYINPKNSEEQKITEMVYNIFRILLYHAIKYEWGGWRVWVDTLSIAHSKVTYEAHKEYLAKMYEEYQRQEEENIKKGKKGNVSTISGLSSQTTGAKGGMEIREIEDLSQSQSPESETDYPVSTDTRDLLMATKVSDDVLGSAERPGGGVHVEVHDLLVDIKAEKVEATEVK	ILTEQVCTQVVHKPHPEPDSTVKIQNPMILKVVATLLKNSTPSAELMEVRRLFLSDMIKLFSNSRENRRCLLQCSVWQDWMFSLGYINPKNSEEQKITEMVYNIFRILLYHAIKYEWGGWRVWVDTLSIAHSKVTYEAHKEYLAKMYEEYQRQEEENIKKGKKGNVSTISGLSSQTTGAKGGMEIREIEDLSQSQSPESETDYPVSTDTRDLLMATKVSDDVLGSAER GGGVHVEVHDLLVDIKAEKVEATEVK
235990	Query_870	1-contig_13268_1	498	gi|326914484|ref|XP_003203555.1|PREDICTED: endonuclease domain-containing 1 protein-like [Meleagris gallopavo]	XP_003203555	480	1	702.59	1812	0	120	497	105	480	0	0	337	360	2	378	QIDDPENEQHEMVLEADIVGTLANLGANQALTSDYVGSGYERGLLNPSSLNKEDFQMATYTLTNAVPLRPSLSKTWHSDVGRVVEQALVPHCSKKDQLYLLAGAVPSSVRVKGKVSVPESLWLAACCDAPEGWSLGLVKKGNDESSLTDLTVEELEKQFLGGLDLFKGSCGEDNKGNEKMEAVLQAVSQIRSGEQVGTNDNQEATDSGLVRKVVGIIATPFIKLLELLIYLLVELVKFTFYFLWLVIKRIGNTLL	EIDDPENDQHEMVIEADVVGSLANLGANQALTSDYVGSGYERGLLNPSLLNREDFQMATYTLTNAVPLRPSLSKIWHSDIRRVVEQALIPHCSKKDQLYLLAGAIPSTVRVKGKVSVPETLWLAACCDAPEGWSLGLVKKVNDESSLADLTVGELEKQLLAGLDLFKGNCGEDNESSEKMEAILQAVSQIR--EQVGANDKEEAKDSGLVRKVVGIIATPFIKLLELFIYLLVELVKFMFYFLWLVIKRVGSTLL	+IDDPEN+QHEMV+EAD+VG+LANLGANQALTSDYVGSGYERGLLNPS LN+EDFQMATYTLTNAVPLRPSLSK WHSD+ RVVEQAL+PHCSKKDQLYLLAGA+PS+VRVKGKVSVPE+LWLAACCDAPEGWSLGLVKK NDESSL DLTV ELEKQ L GLDLFKG+CGEDN+ +EKMEA+LQAVSQIR EQVG ND +EA DSGLVRKVVGIIATPFIKLLEL IYLLVELVKF FYFLWLVIKR+G+TLL
311062	Query_23	6-contig_75806_1	975	gi|326914609|ref|XP_003203617.1|PREDICTED: leucine-rich repeat-containing protein 32-like [Meleagris gallopavo]	XP_003203617	675	1	1101.27	2847	0	262	852	30	620	0	0	559	577	0	591	ANLQAFCHNKDLHQIPRELHPNVNKIDLSGNLIQSISEMPLPFYTSLQCLDLSSNQISFITPGVFAHMTSLLEINLSNNNLYELAQIGTEGIGLLPKVEILDLSHNSLYNGMAEYFIKQAPALRYLSLAGNSIIMILHEMFQGSPSLVEIDLQSNIIMEIEEGAFETLLNLSRLNLSMNSITCISDFSLRQLEILDLSRNSIESFHTTESDDEYSLRCLDLSENKLLRFPVFPKVNKLVTLNLSKNLIQLTAESS	ANLQAFCHNKDLHQIPRELHPNVNKIDLSGNLIQSIPEMPLPLYSSLQCLDLSSNQISFITPGVFAHMTSLLEINLANNNLYELAQIGTEGIGLLPKVEILDLSHNSLYNGMAEYFIKRAPALRYLSLAGNSIIMISHKMFQGSPSLVEIDLQSNIIMEIEEGAFETLLNLSRLNLSMNSITCISDFNLRQLEILDLSRNSIESFHTTASDDEYSLRCLDLSENKLLRFPVFPQVNKLVTLNLSKNLIQLTAESS	ANLQAFCHNKDLHQIPRELHPNVNKIDLSGNLIQSI EMPLP Y+SLQCLDLSSNQISFITPGVFAHMTSLLEINL+NNNLYELAQIGTEGIGLLPKVEILDLSHNSLYNGMAEYFIK+APALRYLSLAGNSIIMI H+MFQGSPSLVEIDLQSNIIMEIEEGAFETLLNLSRLNLSMNSITCISDF+LRQLEILDLSRNSIESFHTT SDDEYSLRCLDLSENKLLRFPVFP+VNKLVTLNLSKNLIQLTAESS
156087	Query_874	31-contig_670_1	3376	gi|326914721|ref|XP_003203671.1|PREDICTED: b-cell lymphoma/leukemia 11A-like [Meleagris gallopavo]	XP_003203671	850	1	1145.57	2962	0	479	1122	184	827	0	0	640	640	0	644	KEEPSSYTCTTCKQPFNSAWFLLQHAQNTHGLRIYLESEHGSPLTPRVGIPSGLGAECPSQPPLHGIHIADNNPFNLLRIPGSVSREASGLGEGRFPPTPPLFSPPPRHHLDPHRIERLGAEEMALATHHPSAFDRVLRLNPMAMEPPAMDFSRRLRELAGNTSSPPLSPSRPSPMQRLLQPFQPGSKPPFLATPPLPPLQSAPPPSQPPMKSKSCEFCGKTFKFQSNLVVHRRSHTGEKPYKCNLCDHACTQAS	KEEPSSYTCTTCKQPFNSAWFLLQHAQNTHGLRIYLESEHGSPLTPRVGIPSGLGAECPSQPPLHGIHIADNNPFNLLRIPGSVSREASGLGEGRFPPTPPLFSPPPRHHLDPHRIERLGAEEMALATHHPSAFDRVLRLNPMAMEPPAMDFSRRLRELAGNTSSPPLSPSRPSPMQRLLQPFQPGSKPPFLATPPLPPLQSAPPPSQPPMKSKSCEFCGKTFKFQSNLVVHRRSHTGEKPYKCNLCDHACTQAS	KEEPSSYTCTTCKQPFNSAWFLLQHAQNTHGLRIYLESEHGSPLTPRVGIPSGLGAECPSQPPLHGIHIADNNPFNLLRIPGSVSREASGLGEGRFPPTPPLFSPPPRHHLDPHRIERLGAEEMALATHHPSAFDRVLRLNPMAMEPPAMDFSRRLRELAGNTSSPPLSPSRPSPMQRLLQPFQPGSKPPFLATPPLPPLQSAPPPSQPPMKSKSCEFCGKTFKFQSNLVVHRRSHTGEKPYKCNLCDHACTQAS
322594	Query_995	3-contig_43647_1	1288	gi|326914769|ref|XP_003203695.1|PREDICTED: leucine-rich repeat transmembrane protein FLRT3-like [Meleagris gallopavo]	XP_003203695	647	1	1080.86	2794	0	509	1031	1	523	0	0	522	523	0	523	MITVPWSVFLIWTKIGLLLDMAPHSVTAKSCPSVCRCDVGFIYCNDRDLTSIPTGIPEDATNLFLQNNQINNAGIPSELKNLRRVERIFLYHNSLDEFPTNLPKYVKELHLQENNIRTITYDSLSQIPYLEELHLDDNSVSAVSIEDGAFRDNIYLRLLFLSRNHLSTIPWGLPKTIEELRLDDNRISTISELSLQDLTNLKRLVLDGNLLNNHGLGDKVFMNLVNLTELSLVRNSLTAAPVNLPGTNLRKLYLQ	MITVPWSVFLIWTKIGLLLDMAPYSVTAKSCPSVCRCDVGFIYCNDRDLTSIPTGIPEDATNLFLQNNQINNAGIPSELKNLRRVERIFLYHNSLDEFPTNLPKYVKELHLQENNIRTITYDSLSQIPYLEELHLDDNSVSAVSIEDGAFRDNIYLRLLFLSRNHLSTIPWGLPKTIEELRLDDNRISTISELSLQDLTNLKRLVLDGNLLNNHGLGDKVFMNLVNLTELSLVRNSLTAAPVNLPGTNLRKLYLQ	MITVPWSVFLIWTKIGLLLDMAP+SVTAKSCPSVCRCDVGFIYCNDRDLTSIPTGIPEDATNLFLQNNQINNAGIPSELKNLRRVERIFLYHNSLDEFPTNLPKYVKELHLQENNIRTITYDSLSQIPYLEELHLDDNSVSAVSIEDGAFRDNIYLRLLFLSRNHLSTIPWGLPKTIEELRLDDNRISTISELSLQDLTNLKRLVLDGNLLNNHGLGDKVFMNLVNLTELSLVRNSLTAAPVNLPGTNLRKLYLQ
291413	Query_312	72-contig_7304_1	435	gi|326914935|ref|XP_003203778.1|PREDICTED: follicle-stimulating hormone receptor-like [Meleagris gallopavo]	XP_003203778	693	1	789.26	2037	0	26	434	285	693	0	0	392	398	0	409	STELYPICSVPQGKQDFSEQPGRKKHRRSAGEDYISPYGTSFGLAENEFDYGLCNEVINVACSPKPDAFNPCEDIMGYNVLRVLIWFINILAITGNTVVLIILISSQYKLTVPRFLMCNLAFADLCIGIYLLFIASVDIQTKSQYYNYAIDWQTGAGCNAAGFFTVFASELSVYTLTVITLERWHTITYAMQLDRKVRLRHAVIIMIFGWMFAFTVALLPIFGISSYMKVSICLPMHIETPYSQAYVIFLLVLNV	NTELYPICSISQAKQDLDEQTGKKKHKRSAAEDYISHYGTRFGPAENEFDYGLCNEVINVACSPKPDAFNPCEDIMGYNVLRVLIWFINILAITGNTTVLIILISSQYKLTVPRFLMCNLAFADLCIGIYLLFIASVDIQTKSQYYNYAIDWQTGAGCNAAGFFTVFASELSVYTLTVITLERWHTITYAMQLDRKVRLRHAVIIMIFGWMFAFTVALLPIFGISSYMKVSICLPMHIETPFSQAYVIFLLVLNV	+TELYPICS+ Q KQD EQ G+KKH+RSA EDYIS YGT FG AENEFDYGLCNEVINVACSPKPDAFNPCEDIMGYNVLRVLIWFINILAITGNT VLIILISSQYKLTVPRFLMCNLAFADLCIGIYLLFIASVDIQTKSQYYNYAIDWQTGAGCNAAGFFTVFASELSVYTLTVITLERWHTITYAMQLDRKVRLRHAVIIMIFGWMFAFTVALLPIFGISSYMKVSICLPMHIETP+SQAYVIFLLVLNV
53175	Query_486	1-contig_4336_1	615	gi|326915189|ref|XP_003203902.1|PREDICTED: LOW QUALITY PROTEIN: prospero homeobox protein 1-like [Meleagris gallopavo]	XP_003203902	736	1	1176.39	3042	0	34	608	1	575	0	0	569	571	0	575	MPDHDSTALLSRQTKRRRVDIGVKRTVGTASAFFAKARATFFSAMNPQGSEQDVEYSVVQHADGEKSNVLRKLLKRANSYEDAMMPFPGATIISQLLKNNMNKNGGTEPSFQASGLSSTGSEVHQEDVCSNSSRDSPQECLSPFGRPTMSQFDVDRLCDEHLRAKRARVENIIRGMSHSPSVALRGNENEREIAPQSVSPRESYRENKRKQKLPQQQQQSFQQLVSARKEQKREERRQLKQQLEDMQKQLRQLQE	MPDHDSTALLSRQTKRRRVDIGVKRTVGTASAFFAKARATFFSAMNPQGSEQDVEYSVVQHADGEKSNVLRKLLKRANSYEDAMMPFPGATIISQLLKNNMNKNGGTEPSFQASGLSSTGSEVHQEDVCSNSSRDSPQECLSPFGRPTMSQFDVDRLCDEHLRAKRARVENIIRGMSHSPSVALRGNENEREIAPQSVSPRESYRENKRKQKLPQQQQQSFQQLVSARKEQKREERRQLKQQLEDMQKQLRQLQE	MPDHDSTALLSRQTKRRRVDIGVKRTVGTASAFFAKARATFFSAMNPQGSEQDVEYSVVQHADGEKSNVLRKLLKRANSYEDAMMPFPGATIISQLLKNNMNKNGGTEPSFQASGLSSTGSEVHQEDVCSNSSRDSPQECLSPFGRPTMSQFDVDRLCDEHLRAKRARVENIIRGMSHSPSVALRGNENEREIAPQSVSPRESYRENKRKQKLPQQQQQSFQQLVSARKEQKREERRQLKQQLEDMQKQLRQLQE
340993	Query_678	21-contig_1672_1	763	gi|326915199|ref|XP_003203907.1|PREDICTED: LOW QUALITY PROTEIN: ribosomal protein S6 kinase delta-1-like [Meleagris gallopavo]	XP_003203907	1066	1	938.717	2425	0	90	620	389	914	0	0	472	494	5	531	CRSNLHCGLKEIVYPVNIDIFLSTSASSFLAGGKLWSYVSKFLNTSPEESFEIPEPKTSSSTKIHLEQPTPSPKEISSSTDSRESYGENMLKVVPLRSSLTPSSQDDSSNQEDGQESSKWMDSASSSEEECTTSYLTLCNEYGQEKIDSGSLNEEPVVKVESQSLNIKERSSLQKCSIVGSDSFSSQVPSQELKLFIDDAESEIASPTRILDSLTKSKNSPMELFRIDSKDSTSELLGLDLGEKLYNLKSEPLKP	CVPNMVCLHKYIISEESVFLVLQHAE-----GGKLWSYVSKFLNTSPEQSFEIPETKTFSSTKILLERPTPSPKDISSSTDSRESYGENMLKVVPLRSSLTPSSQDDSSNQEDGQESSKWMDSASSSEEECTTSYLTLCNEYGQEKIDSGSLNEEPMVKVESQSLNIKEKSSLEKCTVVSSDSFSSHVPSQELKLFIDDAESEIASPTRILDSLTKSKKSPMELFRIDSKDSASELLGLDLGEKLYNLKSEPLKP	C N+ C K I+ ++ + L + GGKLWSYVSKFLNTSPE+SFEIPE KT SSTKI LE+PTPSPK+ISSSTDSRESYGENMLKVVPLRSSLTPSSQDDSSNQEDGQESSKWMDSASSSEEECTTSYLTLCNEYGQEKIDSGSLNEEP+VKVESQSLNIKE+SSL+KC++V SDSFSS VPSQELKLFIDDAESEIASPTRILDSLTKSK SPMELFRIDSKDS SELLGLDLGEKLYNLKSEPLKP
196372	Query_62	6-contig_12641_1	938	gi|326915312|ref|XP_003203963.1|PREDICTED: leucine-rich repeat and fibronectin type-III domain-containing protein 2-like [Meleagris gallopavo]	XP_003203963	762	1	922.154	2382	0	1	446	1	446	0	0	444	444	0	446	MEKLLCGILVFGMAVMVNACPKYCVCQNLSESLGTLCPSKGLLFVPLDIDRRTVELRLGGNFIINISRQDFANMSGLVDLTLSRNTISYIQPYSFTDLESLRSLHLDSNRLPDIGEDILRGLINLQHLILNNNQLTSISDEAFEDFLLTLEDLDLSYNNLRSIPWESIRKMINLHQLSLDHNLIDYITEGTFADLQKLARLDLTSNRLQKLPPDPIFARSQAIPLAVTPFSPPLSLSFGGNPLHCNCELLWLRRL	MEKLLCGILVFGMAVMVNACPKYCVCQNLSESLGTLCPSKGLLFVPLDIDRRTVELRLGGNFIINISRQDFANMSGLVDLTLSRNTISYIQPYSFTDLESLRSLHLDSNRLPDIGEDILRGLINLQHLILNNNQLTSISDEAFEDFLLTLEDLDLSYNNLRSIPWESIRKMINLHQLSLDHNLIDYITEGTFADLQKLARLDLTSNRLQKLPPDPIFARSQVIPLAVTPFSPPLSLSFGGNPLHCNCELLWLRRL	MEKLLCGILVFGMAVMVNACPKYCVCQNLSESLGTLCPSKGLLFVPLDIDRRTVELRLGGNFIINISRQDFANMSGLVDLTLSRNTISYIQPYSFTDLESLRSLHLDSNRLPDIGEDILRGLINLQHLILNNNQLTSISDEAFEDFLLTLEDLDLSYNNLRSIPWESIRKMINLHQLSLDHNLIDYITEGTFADLQKLARLDLTSNRLQKLPPDPIFARSQ IPLAVTPFSPPLSLSFGGNPLHCNCELLWLRRL
272019	Query_197	15-contig_190_1	538	gi|326915368|ref|XP_003203990.1|PREDICTED: epoxide hydrolase 1-like [Meleagris gallopavo]	XP_003203990	486	1	890.182	2299	0	75	537	24	486	0	0	423	438	0	463	QKNGVLLPVAAVGVGGMLVCWLMSRRKVTTMEMGDGWWGSGEKHLKGKEDESIRPFKIETSDEEIEDLHHRLDRARYAPPLEGAAFNYGFNSDYLQKVVAYWRNKFDWRKQVEILNKYPHFHTTIEGIDIHFIHVKPSYVPHGKAVQPLLMVHGWPGSFYEFYKIIPLLTDPTKHGLDSGDVVFEIICPSIPGYGFSEAPRQQGFDTRATARIFHKLMKRLGFKEYYVQGGDWGSLVTINMSQMLPQSVKGLHLN	QKNAVLVPVAAVGVGGMLVCWLMSRRKIKSIEMGDGWWGSGEKPLKGKEDESIRPFKIETSDEEIEDLHRRLDQARYAPPLEGAAFNYGFNSDYLQKVVAYWRNKFDWHKQVEILNKYPHFRTTIEGIDIHFIHVKPSYVPHGKAVQPLLMVHGWPGSFYEFYKIIPLLTDPTKHGLDSGDVVFEVICPSIPGYGFSEAPHQQGFDTLATARIFHKLMKRLGFKEYYVQGGDWGSRVTTNMSQMLPQSVKGLHLN	QKN VL+PVAAVGVGGMLVCWLMSRRK+ ++EMGDGWWGSGEK LKGKEDESIRPFKIETSDEEIEDLH RLD+ARYAPPLEGAAFNYGFNSDYLQKVVAYWRNKFDW KQVEILNKYPHF TTIEGIDIHFIHVKPSYVPHGKAVQPLLMVHGWPGSFYEFYKIIPLLTDPTKHGLDSGDVVFE+ICPSIPGYGFSEAP QQGFDT ATARIFHKLMKRLGFKEYYVQGGDWGS VT NMSQMLPQSVKGLHLN
118642	Query_634	19-contig_190_1	573	gi|326915376|ref|XP_003203994.1|PREDICTED: exportin-5-like [Meleagris gallopavo]	XP_003203994	1170	1	944.88	2441	0	1	529	48	688	0	0	505	513	112	641	MPRLEKVYLKNNVMGLISSGTQSILEEESHIKDVLSRIVVEMIKREWPQHWPDMLKELDTLSKQGETQTELVMFILLRLAEDVVTFQTLPTQRRRDIQQTLTQNMEKIFSFLLTTLQQNVNKYRRMKTDLAQQPKAQANCRVGIAALNTLAGYIDWVALSHITADNCKLLEMLCLLLNEPELQIGAAECLLIAVSRKG--------------------------SDSE--VETPANFGKYL--------------	MPRLEKVYLKNNVMGLISSGTQSILEEESHIKDVLSRIVVEMIKREWPQHWPDMLKELDTLSKQGETQTELVMFILLRLAEDVVTFQTLPTQRRRDIQQTLTQNMEKIFSFLLTTLQQNVNKYRRMKTDLAQQPKAQANCRVGIAALNTLAGYIDWVALSHITADNCKLLEMLCLLLNEPELQIGAAECLLIAVSRKGKLEDRKPLMVLFGDVAMHYILSAAQTADGEGLVEKHYVFLKRLCQVLCALGSQLCAL	MPRLEKVYLKNNVMGLISSGTQSILEEESHIKDVLSRIVVEMIKREWPQHWPDMLKELDTLSKQGETQTELVMFILLRLAEDVVTFQTLPTQRRRDIQQTLTQNMEKIFSFLLTTLQQNVNKYRRMKTDLAQQPKAQANCRVGIAALNTLAGYIDWVALSHITADNCKLLEMLCLLLNEPELQIGAAECLLIAVSRKG +D E VE F K L
352045	Query_1017	19-contig_4679_1	1510	gi|326915388|ref|XP_003204000.1|PREDICTED: zinc finger protein 318-like [Meleagris gallopavo]	XP_003204000	2139	1	722.62	1864	0	457	841	265	650	0	0	357	368	1	386	SVFQSEDFSSSPAPSKDLPLLSSHSSLPQSSNAAPFSSEVENFLKRFNKDSVMESANKELHDGLYEWNPLSAAPKDTLTYEEKFGSFLSHKDKIEPKSEPVDRHTDFLLPHERASQDGSGFSRILGMMADSVSAQEKRRRSFPDIEDEEKFLYGDEDEDTKTEPHLVQKPPVSGSTE-ISQKVSLPPSSAPAVKLDPLEEPNAEYAKIHDLLKTIGLDIGVAEIGRLAIRTQERLHGKKLASRSPDRRSSDTRRT	SPVQPEEFFSSPAPSKDLPLLSSHSSLPQSNNTAQFSSEVENFLKQFNKDSVMEPANKELHDGLYEWNPLSAAPKDTFTYEEKFGSFLSHKDKIEPKSEPTDRHTDFLLPHERASQDGSGFSRILGMMADSVSAQEKRRRSFPDIEDEEKFLYGDEDEDTNTESHLVQKPPVSCTSELINQKVSLPPSPAPAVKLDPLEEPNAEYAKIHDLLKTIGLDIGVAEIGRLAIRTQERLHGKKLASRSPDRRSSDTRRT	S Q E+F SSPAPSKDLPLLSSHSSLPQS+N A FSSEVENFLK+FNKDSVME ANKELHDGLYEWNPLSAAPKDT TYEEKFGSFLSHKDKIEPKSEP DRHTDFLLPHERASQDGSGFSRILGMMADSVSAQEKRRRSFPDIEDEEKFLYGDEDEDT TE HLVQKPPVS ++E I+QKVSLPPS APAVKLDPLEEPNAEYAKIHDLLKTIGLDIGVAEIGRLAIRTQERLHGKKLASRSPDRRSSDTRRT
2244	Query_694	25-contig_9155_1	655	gi|326915404|ref|XP_003204008.1|PREDICTED: baculoviral IAP repeat-containing protein 6-like [Meleagris gallopavo]	XP_003204008	4785	1	838.18	2164	0	1	410	427	836	0	0	408	410	0	410	MEVNLDITALSILQQPEKLQWEIVANVLEDTVKDLEELGANPCLANCKSEKMKEKHVEQHNIPFPCLLAGGLLTYKSPATSPVSSNSQRSLDGLSRTRGESVSEQGSTDNESCTISELNSPLVRRTLPVLLLYSIKESDERGKLFSQVNFISKSIHEDGFTVPQIIEMELDSQEQLLLQDPPVTYIQQFADAAANLTSPDSDKWSSMVPKPGTLVQCLRLPKFAEEENLCVDSITPCADGVHLLVGLRTCPVESL	MEVNLDITALSILQQPEKLQWEIVANVLEDTVKDLEELGANPCLANCKSEKMKEKHVEQHNIPFPCLLAGGLLTYKSPATSPVSSNSQRSLDGLSRTRGESVSEQGSTDNESCTISELNSPLVRRTLPVLLLYSIKESDERGKLFSQVNFISKSIHEDGFTVPQIIEMELDSQEQLLLQDPPVTYIQQFADAAANLTSPDSDKWSSMVPKPGTLVQCLRLPKFAEEENLCVDSITPCADGVHLLVGLRTCPVESL	MEVNLDITALSILQQPEKLQWEIVANVLEDTVKDLEELGANPCLANCKSEKMKEKHVEQHNIPFPCLLAGGLLTYKSPATSPVSSNSQRSLDGLSRTRGESVSEQGSTDNESCTISELNSPLVRRTLPVLLLYSIKESDERGKLFSQVNFISKSIHEDGFTVPQIIEMELDSQEQLLLQDPPVTYIQQFADAAANLTSPDSDKWSSMVPKPGTLVQCLRLPKFAEEENLCVDSITPCADGVHLLVGLRTCPVESL
193432	Query_762	7-contig_3372_1	537	gi|326915404|ref|XP_003204008.1|PREDICTED: baculoviral IAP repeat-containing protein 6-like [Meleagris gallopavo]	XP_003204008	4785	1	643.654	1659	0	1	458	4314	4775	0	0	370	380	90	505	MARHVPLYRALLELLRAIASCTSMVPLLLPLSGENSEEEEEQLESQASVGTLLAKMKTCVDTYTNRLRQRFPLPKQQFSLHVYRTSLALNSSQLGGSESSQLFEVNNGLTSKKDKAKAGVKPDTSDQEPEGLTLLVPDIQKTAEIVYAATTSLRQANQEKKMAEYSKKAAVKPKPLSVLRSLEEKYVAVMKKLQFDTFEMVSEDDDGKLVFKVNYHYMSQVKNASDANSAARARRLAQEAVTLSTSLPLSSSSSV	MARHVPLYRALLELLRAIASCTSMVPLLLPLSGENSEEEEEQLESQASVGTLLAKMKTCVDTYTNRLR------------------------------------------SKKDKAKAGVKPDTSDQEPEGLTLLVPDIQKTAEIVYAATTSLRQANQEKKMAEYSKKAAVKPKPLSVLRSLEEKYVAVMKKLQFDTFEMVSEDDDGKLVFKVNYHYMSQVKNASDANSAARARRLAQEAVTLSTSLPLSSSSSV	MARHVPLYRALLELLRAIASCTSMVPLLLPLSGENSEEEEEQLESQASVGTLLAKMKTCVDTYTNRLR SKKDKAKAGVKPDTSDQEPEGLTLLVPDIQKTAEIVYAATTSLRQANQEKKMAEYSKKAAVKPKPLSVLRSLEEKYVAVMKKLQFDTFEMVSEDDDGKLVFKVNYHYMSQVKNASDANSAARARRLAQEAVTLSTSLPLSSSSSV
308525	Query_285	14-contig_38509_1	1229	gi|326915437|ref|XP_003204024.1|PREDICTED: centrosomal protein of 170 kDa-like, partial [Meleagris gallopavo]	XP_003204024	1397	1	1105.12	2857	0	248	849	615	1213	0	0	575	585	3	602	DTDISESGISIRSAGSATSVTSQGERKRRTLPQLPKEEKMSESSRTKTSSHQRSEIGEKQDTELQEKETPARASDTDSRSVAKSSRTVNGLSPKTTGEKAFSFPSSSSKERAETGRETSVVKQALAKIQQERKEQGHWTPTKSATNLVEKDKEENAASRKTLDHQDKAPAHVTDKAEMKLAQSEAKRRKNEESIKGQTPKISGEKKESSKPLVRQGSFTIDKPSTNIPIELIPHINKQSGPAAPLASANRIRDRS	DTDISESGISIRSTGSATSVTSQGERKRRTLPQLPKEEKMSESSRTKTASHQRSEIGEKQDTELQEKETPARASDTESRSIAKSSRTVNGLSPKATGEKVFSFPSSSSKERAETGRENSVVKQALAKIQQERKEQGHWTPTKSATNLVEKDKEEIAVSRKTLDNQNKAPGH--DKAAMKLAQSEGKRRRNEESIKGQSPKASGEKKESSKPLVRQGSFTIDKPSTNIPIELIPHINKQSGSAAPLASANRIRDRS	DTDISESGISIRS GSATSVTSQGERKRRTLPQLPKEEKMSESSRTKT+SHQRSEIGEKQDTELQEKETPARASDT+SRS+AKSSRTVNGLSPK TGEK FSFPSSSSKERAETGRE SVVKQALAKIQQERKEQGHWTPTKSATNLVEKDKEE A SRKTLD+Q+KAP H DKA MKLAQSE KRR+NEESIKGQ+PK SGEKKESSKPLVRQGSFTIDKPSTNIPIELIPHINKQSG AAPLASANRIRDRS
110968	Query_547	7-contig_57719_1	1240	gi|326915484|ref|XP_003204047.1|PREDICTED: muscarinic acetylcholine receptor M3-like [Meleagris gallopavo]	XP_003204047	639	1	1132.47	2928	0	69	656	26	613	0	0	572	578	0	588	FYFSPHCRLCQRATMIMHNNSSALPLFSNVSSFWKRDSHGPGLLDEGASLIGSYDFPQTTESFPFSTVESTNTSLNATIKDPLGGHTVWQVVLIAFLTGIIALVTIIGNILVIVSFKVNKQLKTVNNYFLLSLACADLIIGVISMNLFTTYIIMGHWALGNLACDLWLSIDYVASNASVMNLLVISFDRYFSITRPLTYRAKRTTKRAGVMIGLAWVISFVLWAPAILFWQYFVGKRTVPPDECFIQFLSEPTIT	FDVPPWTILCQRATMIMHNSSSALPLFSNVSSFWKRDSHGPGLLDEGASLIGSYDFPQTTESFPFSTVESTNTSLNATIKDPLGGHTVWQVVLIAFLTGIIALVTIIGNILVIVSFKVNKQLKTVNNYFLLSLACADLIIGVISMNLFTTYIIMGHWALGNLACDLWLSIDYVASNASVMNLLVISFDRYFSITRPLTYRAKRTTKRAGVMIGLAWVISFVLWAPAILFWQYFVGKRTVPPDECFIQFLSEPIIT	F P LCQRATMIMHN+SSALPLFSNVSSFWKRDSHGPGLLDEGASLIGSYDFPQTTESFPFSTVESTNTSLNATIKDPLGGHTVWQVVLIAFLTGIIALVTIIGNILVIVSFKVNKQLKTVNNYFLLSLACADLIIGVISMNLFTTYIIMGHWALGNLACDLWLSIDYVASNASVMNLLVISFDRYFSITRPLTYRAKRTTKRAGVMIGLAWVISFVLWAPAILFWQYFVGKRTVPPDECFIQFLSEP IT
210909	Query_368	1-contig_10276_1	572	gi|326915563|ref|XP_003204085.1|PREDICTED: TAF5-like RNA polymerase II p300/CBP-associated factor-associated factor 65 kDa subunit 5L-like [Meleagris gallopavo]	XP_003204085	589	1	1024.23	2647	0	17	544	46	555	0	0	504	507	18	528	VNIQSESGCANVVSAAPCLPEPQQYEVQFGRLRNFLTDSDSQHSHEVMPLLYPLFVYLHLNMVQNGLKSTVDSFYSRFHGMFLQNASQKDIIEQLQTTMTIQDILSNLKLRAFLDNKYVIRLQEDSYNYLLRYLQSDNNNALCKVLTLHIHLDVQPSKRTDYQLYASGSSSRSESNGLEPSEVPASILQNEAALELLQDSIKRVKDGPPSLTTICFYAFYNTEQLLNTAEISPNSKLLAAGFDNSCVKLWSLRSK	LTVQSESGCANVVSAAPCLPEPQQYEVQFGRLRNFLTDSDSQHSHEVMPLLYPLFVYLHLNMVQNGLKSTVDSFYSRFHGMFLQNASQKDIIEQLQTTMTIQDILSNLKLRAFLDNKYVIRLQEDSYNYLLRYLQSDNNNALCKVLTLHIHLDVQPSKRTDYQLYASGSSSRNESNGLEPSEVPASILQNEAALELLQDSIKRVKDGPPSLTTICFYAFYNTEQLLNTAEISPNSKLLAAGFDNSCVKLWSLRSK	+ +QSESGCANVVSAAPCLPEPQQYEVQFGRLRNFLTDSDSQHSHEVMPLLYPLFVYLHLNMVQNGLKSTVDSFYSRFHGMFLQNASQKDIIEQLQTTMTIQDILSNLKLRAFLDNKYVIRLQEDSYNYLLRYLQSDNNNALCKVLTLHIHLDVQPSKRTDYQLYASGSSSR+ESNGLEPSEVPASILQNEAALELLQDSIKRVKDGPPSLTTICFYAFYNTEQLLNTAEISPNSKLLAAGFDNSCVKLWSLRSK
381655	Query_532	9-contig_2234_1	910	gi|326915698|ref|XP_003204150.1|PREDICTED: serine/threonine-protein kinase LATS1-like [Meleagris gallopavo]	XP_003204150	1135	1	887.1	2291	0	315	875	168	729	0	0	509	522	9	566	GTVQQSINRKQSWKGSKESLVPQRHGPSLADGVAYRSESPSSQPDVGRPLSGSGIAAFAQAHPGNGQRVNPPPLPQIRSVTPPPPPPRGQTPPPRGTTPPPPSWEPNAQTKRYSGNMEYVITRISPVPPGAWQDGYPPPPMNPPPMNSSAQGQRGISAVPIGRQPIIMQSSANSKFSFPSGRAGMQNGNCQAEFIVHQNVVSGNSVSRQPPPYPMNSTNRQSPTALQMQAGGSAPPSAYTNGNLPPSMLVPNRNS	GTVQQSINRKQSWKGSKESLVPQRHGPSLADGVVYRSESPSSQPDVGRPLSGSGIAAFAQAHPGNGQRVNPPPLPQIRSVTPPPPPPRGQTPPPRGTTPPPPSWEPNAQTKRYSGNMEYVITRISPVPPGAWQDGYPPPPMNPPPMNSSTQGQRGMSAVPIGRQPIIMQSSANSKFSFPSGRAGMQNGNCQAEFIVHQNVVSGNSVSRQPPPYPMNSTNRQSPTALQMQAGGSAPPSAYTNGNLPPTMLVPNRNS	GTVQQSINRKQSWKGSKESLVPQRHGPSLADGV YRSESPSSQPDVGRPLSGSGIAAFAQAHPGNGQRVNPPPLPQIRSVTPPPPPPRGQTPPPRGTTPPPPSWEPNAQTKRYSGNMEYVITRISPVPPGAWQDGYPPPPMNPPPMNSS QGQRG+SAVPIGRQPIIMQSSANSKFSFPSGRAGMQNGNCQAEFIVHQNVVSGNSVSRQPPPYPMNSTNRQSPTALQMQAGGSAPPSAYTNGNLPP+MLVPNRNS
357613	Query_499	25-contig_21405_1	1016	gi|326915702|ref|XP_003204152.1|PREDICTED: pleckstrin homology domain-containing family G member 1-like [Meleagris gallopavo]	XP_003204152	1308	1	1035.79	2677	0	428	989	381	942	0	0	526	537	0	562	SPQSSKDPSDEELSQLNTDIPFSCSARQLQSPRQFNTPQNNSLIMNILGGTTSVRNIWTDHQIRQALFPSRRPPYENEDDDDDYQMFMPSMSTSNTGSAVGGERRGPSDRPCSWHLGVAHQSETPSSNRHKIVRRASSAGESNLCPVNTRCKISERSSRRDVKRTEVSSMNAYPESSEELTIDDIEHVYDNISYEDLKLMGLTRREEAHHGPQRSARDSLYEEENKSSLNSPSKKRTTNQSRASLHASRDEIRLG	SPDMQKDPSDEESSQLNTDLRFSCSARQSQSPRQFNTPQNSSLIMNMLGGTTSVRNIWTDHQIRQALFPSRRPPYENEDDDDDYQMFMPSMSTSNTGSAVSGERRGHSDRPCSWHLGVVHQNETPSSNRHKIVRRASSAGESNTCPTITRCKISERSSRRDVKRTEVNSMNAYPESSEELTTDDIEHVYDNISYEDLKLMGLTRREETHPGPQRSARDSLYEEENKSRLNSASKKRTANQSRASLHASRDEILLG	SP KDPSDEE SQLNTD+ FSCSARQ QSPRQFNTPQN+SLIMN+LGGTTSVRNIWTDHQIRQALFPSRRPPYENEDDDDDYQMFMPSMSTSNTGSAV GERRG SDRPCSWHLGV HQ+ETPSSNRHKIVRRASSAGESN CP TRCKISERSSRRDVKRTEV+SMNAYPESSEELT DDIEHVYDNISYEDLKLMGLTRREE H GPQRSARDSLYEEENKS LNS SKKRT NQSRASLHASRDEI LG
101861	Query_400	9-contig_5749_1	2261	gi|326915736|ref|XP_003204169.1|PREDICTED: hypothetical protein LOC100542314 [Meleagris gallopavo]	XP_003204169	1929	1	1760.35	4558	0	153	1334	82	1258	0	0	1048	1087	19	1189	TVEQTESSSITPKEDDTQTMETSPSDSSAKNSVAAEKEDAHIDKRLPSLEEDAEDAEHASEPQSYDLGFKKVFKFVGFRFTVKKEKTGKSEPVQLLTVKKEAQVTEGADEQKEVSSEETVMPEDAPPAEDNTKDALKNEKTEDESPKTPEANE----SSASATDTASPLRKFFSQGWTGFRKKKSFRKPKEDEQQSPTKEEQEKEGATLTTETSEKEKSESEKQVEEKDVTAVTVETHEKEQTEDEKQESKTAAT	SIEQTEPSSVTLKEDDTQTMETSPSDSSTKDGVAAEKEDAHTDKRSPSVEEDAEDAEHVSEPQSYDLGFKKVFKFVGFRFTVKKEKTGKSEPVQLLTVKKETQVTEGADDQKEVSSEETVMPEDAPSAEDNAKDALKNEKTEDESPKTPEANEMCSQSSASAADTASPLRKFFSQGWTGFRKKKSFRKPKEDEQQSPTKEEQEKEGAMLMTETSEKEKSESEEQVEEKDVTTVTTETQEKEQTEDEKQKSKTATT	++EQTE SS+T KEDDTQTMETSPSDSS K+ VAAEKEDAH DKR PS+EEDAEDAEH SEPQSYDLGFKKVFKFVGFRFTVKKEKTGKSEPVQLLTVKKE QVTEGAD+QKEVSSEETVMPEDAP AEDN KDALKNEKTEDESPKTPEANE SSASA DTASPLRKFFSQGWTGFRKKKSFRKPKEDEQQSPTKEEQEKEGA L TETSEKEKSESE+QVEEKDVT VT ET EKEQTEDEKQ+SKTA T
8776	Query_1029	13-contig_8486_1	416	gi|326915794|ref|XP_003204197.1|PREDICTED: ezrin-like [Meleagris gallopavo]	XP_003204197	583	1	797.349	2058	0	1	398	186	583	0	0	397	398	0	398	MLEYLKIAQDLEMYGINYFEIKNKKGTDLWLGVDALGLNIYEKDDKLTPKIGFPWSEIRNISFNDKKFVIKPIDKKAPDFVFYAPRLRINKRILQLCMGNHELYMRRRKPDTIEVQQMKAQAREEKHQKQLERQQLENEKKKRETIEREKEQMLREKEELLVRLQEYEVKTKRAEKELSDQIQRALQLEEERRRAQEEAERLEADRLAALQAKEELERQNIDQIKSQEQLAAELAEYTAKIALLEEARKRKENEV	MLEYLKIAQDLEMYGINYFEIKNKKGTDLWLGVDALGLNIYEKDDKLTPKIGFPWSEIRNISFNDKKFVIKPIDKKAPDFVFYAPRLRINKRILQLCMGNHELYMRRRKPDTIEVQQMKAQAREEKHQKQLERQQLENEKKKRETIEREKEQMLREKEELLVRLQEYEVKTKRAEKELSDQIQRALQLEEERRRAQEEAERLEADRLAALQAKEELERQNIDQIKSQEQLAAELAEYTAKIALLEEARKRKENEV	MLEYLKIAQDLEMYGINYFEIKNKKGTDLWLGVDALGLNIYEKDDKLTPKIGFPWSEIRNISFNDKKFVIKPIDKKAPDFVFYAPRLRINKRILQLCMGNHELYMRRRKPDTIEVQQMKAQAREEKHQKQLERQQLENEKKKRETIEREKEQMLREKEELLVRLQEYEVKTKRAEKELSDQIQRALQLEEERRRAQEEAERLEADRLAALQAKEELERQNIDQIKSQEQLAAELAEYTAKIALLEEARKRKENEV
223097	Query_351	33-contig_6336_1	514	gi|326916117|ref|XP_003204357.1|PREDICTED: BEN domain-containing protein 3-like isoform 1 [Meleagris gallopavo]	XP_003204357	836	1	859.751	2220	0	80	511	86	517	0	0	423	429	0	432	KGSNSNMKNRDTGSPTQVNAEQPSKNKNPNVTWLCEKEPFSDITTSSYKKPLYGISHKITEKKNAPGAEQFASYDLYEKISPSSPSHLRTLNDQRKRDSAAALAAAAAAVESDPNIYSLIQKMFFTLNTLSSNMTQLHNKVDLLSLEVSRIKKQVSPVECVADFKPPPEYTLTSAELKQLMDQSTSGGDLACRLLVQLFPELFSDDEFNRNCSACGFPNKRKLESLHLQLIRSYVEVCYPSVKSTAVWQVECLPQ	EGSNSNMKNRDTGSPTQVNAEQPSKNKNPNITWLCEEEPFSDITTSSYKKPLYGISHKITEKKNAPGAEQFASYDLYEKISPSSPSHLRTLNDQRKRDSAAALAAAAVAVESDPNIYSLIQKMFFTLNTLSSNMTQLHNKVDLLSLEVSRIKKQVSPVECVADFKPPPEYTLTSAELKQLMDQSTSGGDLACRLLVQLFPELFSDDEFNRNCSACGFPNKRKLESLHLQLIRSYVEVCYPSVKSTAVWQVECLPQ	+GSNSNMKNRDTGSPTQVNAEQPSKNKNPN+TWLCE+EPFSDITTSSYKKPLYGISHKITEKKNAPGAEQFASYDLYEKISPSSPSHLRTLNDQRKRDSAAALAAAA AVESDPNIYSLIQKMFFTLNTLSSNMTQLHNKVDLLSLEVSRIKKQVSPVECVADFKPPPEYTLTSAELKQLMDQSTSGGDLACRLLVQLFPELFSDDEFNRNCSACGFPNKRKLESLHLQLIRSYVEVCYPSVKSTAVWQVECLPQ
211694	Query_663	7-contig_38778_1	2731	gi|326916243|ref|XP_003204419.1|PREDICTED: zinc finger protein 292-like [Meleagris gallopavo]	XP_003204419	2725	1	4422.08	11468	0	208	2568	315	2664	0	0	2201	2272	11	2361	RCIFLTLRIEYVLGFFFFYKYKKGGFTKINLALQIDGAGLATCIELCVKALRLESGENTDVKISICKTISCLLPDDLEVKRACQLSEFLLEPTVDAYYAVEMLYNQPDQKYDEENLPIPNSLRCELLLVLKTQWPFDPEFWDWKTLKRQCLALMGEEASIVSSIDELNDSEVYEKVEDCQEETKETSVNGFAGSFDEASSLLKGIRDEKQKKREIKKLRERGFISARFRNWQAYMQYCVLCDKEFLGHRIVRHAQ	RCRQLSVLTKTVYHIFFLIKV---------INSEIDGAGLATCIELCVKALRLESSENADVKISICKTISCLLPDDLEVKRACQLSEFLLEPTVDAYYAVEMLYNQPDQKYDEENLPIPNSLRCELLLVLKTQWPFDPEFWDWKTLKRQCLALMGEEASIVSSIDELNDSEVYEKVEDCQEETKETSMNGFAGSFDEATSLLKGIRDEKQKKREIKKLRERGFISARFRNWQAYMQYCVLCDKEFLGHRIVRHAQ	RC L++ + V FF K + +IDGAGLATCIELCVKALRLES EN DVKISICKTISCLLPDDLEVKRACQLSEFLLEPTVDAYYAVEMLYNQPDQKYDEENLPIPNSLRCELLLVLKTQWPFDPEFWDWKTLKRQCLALMGEEASIVSSIDELNDSEVYEKVEDCQEETKETS+NGFAGSFDEA+SLLKGIRDEKQKKREIKKLRERGFISARFRNWQAYMQYCVLCDKEFLGHRIVRHAQ
126372	Query_1030	15-contig_31995_1	880	gi|326916345|ref|XP_003204468.1|PREDICTED: LOW QUALITY PROTEIN: PHD finger protein 3-like [Meleagris gallopavo]	XP_003204468	2064	1	801.586	2069	0	50	549	136	631	0	0	430	455	4	500	EPVRSLRQSTLAKRSNIAPVASTKKSSVKSGSAPKTGQKQQEKSPAKEADVGTPLKVEQPKEVRRSTRRSGQTEGTVAASQSNTKSIPGPEGINEVKSEPLEQAKVEETSQELSSNPTGTCTLPAETKEISEIDTKTESGNVDSVSSASVDTEITVVNVEANDVTESIGSEPSSEEKTENKTEELEKITEEQSGLTGKTNDLSTVCMSQSEVAETFSNLSGSVEDGVECRLGSCSVEVPDTNTLSVKECVTEPVD	EPVRSLRQSTLAKRSNIAPVASTKKSSVKSGSATKTGQKQQDKSPAKEADVATPLKVEQPKEVRRSTRRSGQAEGTVAASQS-TKSIPGPEEVNEVKSEPLEQAKVEETSQELSSNSAGDCNLPKETKDISEIAAKAESGNVDSVCPA--DTEISALNDEVNDVNDSMGSESSSEEKTENKTVELEKITEEQSGQTGKTNDLSSVCVNQSEIYETFSNLSGSVEDGVECRLGSCSVEVPDENTLSVKECVTEPVD	EPVRSLRQSTLAKRSNIAPVASTKKSSVKSGSA KTGQKQQ+KSPAKEADV TPLKVEQPKEVRRSTRRSGQ EGTVAASQS TKSIPGPE +NEVKSEPLEQAKVEETSQELSSN G C LP ETK+ISEI K ESGNVDSV A DTEI+ +N E NDV +S+GSE SSEEKTENKT ELEKITEEQSG TGKTNDLS+VC++QSE+ ETFSNLSGSVEDGVECRLGSCSVEVPD NTLSVKECVTEPVD
45237	Query_521	29-contig_15612_1	610	gi|326916424|ref|XP_003204507.1|PREDICTED: disks large-associated protein 2-like [Meleagris gallopavo]	XP_003204507	963	1	638.262	1645	0	58	360	1	303	0	0	300	301	0	303	MKGLSGSRNQPQLCSAHTCGLASPEDCEHTHDHIHHGQEPRQSYLLSPTESCPMDHHRCSPRSSIHSECMMMPMVMGDHMSSSTFPRMHYSSHYDTRDDCAMSHGNPKINRIPANLLDQFEKQLPLHRDGFHTLQYQRTSTAAEQRSESPGRIRHLVHSVQKLFTKSHSLEGSSKGNVNGTKGDSRGDDHHHGHHSKHSKRSKSKERKPETKHKSGMSSWWSSDDNLDSDSTYRTPSVVNRHHADHISHCYPEAL	MKGLSGSRNQPQLCSAHTCGLASPEDCEHTHDHIHHGQEPRQSYLLSPTESCPMDHHRCSPRSSIHSECMMMPMVMGDHMSSSTFPRMHYSSHYDTRDDCAMSHGNPKINRIPANLLDQFEKQLPLHRDGFHTLQYQRTSTAAEQRSESPGRIRHLVHSVQKLFTKSHSLEGSSKGNVNGTKGDSRGDDHHHGHHSKHSKRSKSKERKPETKHKSGMSSWWSSDDNLDSDSTYRTPSVVNRHHADHISHCYPEAL	MKGLSGSRNQPQLCSAHTCGLASPEDCEHTHDHIHHGQEPRQSYLLSPTESCPMDHHRCSPRSSIHSECMMMPMVMGDHMSSSTFPRMHYSSHYDTRDDCAMSHGNPKINRIPANLLDQFEKQLPLHRDGFHTLQYQRTSTAAEQRSESPGRIRHLVHSVQKLFTKSHSLEGSSKGNVNGTKGDSRGDDHHHGHHSKHSKRSKSKERKPETKHKSGMSSWWSSDDNLDSDSTYRTPSVVNRHHADHISHCYPEAL
386357	Query_300	7-contig_31367_1	4218	gi|326916652|ref|XP_003204620.1|PREDICTED: interferon-induced very large GTPase 1-like [Meleagris gallopavo]	XP_003204620	2433	1	4294.58	11137	0	1106	3515	1	2410	0	0	2063	2234	0	2410	MESQEERADDLEKAYLAKQLLAETLQGEGLDGEYWLPKLLEVLGIKSKEALKHLQYEDYLKLECEVRYPWEKTALQKLLGLTDNKATVEELQKQRLEMMKQRQEEAKLALQELKEMHHSHSQSKETIRQKEEALWQAMDIPREYWAPPEKALVDVLASVQKQLEQQEMSMGRSENVSDEEVLRRASGGLALQGIYRTNSLADVLAKREQLIRVPSGFKLAGPEQGSLLERKEFSSSAAEANFTKSIEQLGFSLSV	MESQEERAEDLEKANLAKQLLAETFQSEGLDEGYWLPKLLKILGVKSKEALKHLQYEDYLKLECEVRYPWEKTALQKLLQITDNKATAEELQKQRLEMMKQRQEEAKQALQNLKDMHQSHSYSKEMIRQKEEALWQAMDIPREYWAPPERALADVLASIQKQLEQQEMSLGRSENVSDKEVLRRASGGLALQGIYQTNSLADVLAKREQLIRVPTGFKLAGPEQGSLLERKEFSSSAAEANFTKSMEQLGFSLSA	MESQEERA+DLEKA LAKQLLAET Q EGLD YWLPKLL++LG+KSKEALKHLQYEDYLKLECEVRYPWEKTALQKLL +TDNKAT EELQKQRLEMMKQRQEEAK ALQ LK+MH SHS SKE IRQKEEALWQAMDIPREYWAPPE+AL DVLAS+QKQLEQQEMS+GRSENVSD+EVLRRASGGLALQGIY+TNSLADVLAKREQLIRVP+GFKLAGPEQGSLLERKEFSSSAAEANFTKS+EQLGFSLS
276334	Query_36	16-contig_12872_1	561	gi|326916775|ref|XP_003204680.1|PREDICTED: DNA replication licensing factor MCM3-like [Meleagris gallopavo]	XP_003204680	810	1	1105.89	2859	0	1	560	1	560	0	0	540	553	0	560	MAALAGGLEDAELREAQRDYLDFLDDEEDQGVYHGKVRDMISDNQYRLLVNINDLRRRNEKRASRLLSNAFEELIAFQRALKDFVASVDATYAKQYEDFYIGLEGSFGSRHVSPRTLSACFLGCIVCVEGIVTKCSLVRPKVVRSVHYCPATKKTIERRYTDLMSLDAFPSSSVYPTKDEENNPLETEFGLSVYKDHQTISIQEMPEKAPAGQLPRSVDVILDDDLVDRVKPGDRIQVVGTYRCLPGKKGGYTSG	MAAPAGGLDDAELREAQRDYLDFLDDEEDQGVYHGKVRDMISDNQYRLLVNINDLRRRNEKRASRLLSNAFEELIAFQRALKDFVASVDATYAKQYEDFYIGLEGSFGSKHVSPRTLTACFLSCIVCVEGIVTKCSLIRPKVVRSVHYCPATKKTIERRYTDLTSLDAFPSSSVYPTKDEENNPLETEFGLSVYKDHQTISIQEMPEKAPAGQLPRSVDVILDDDLVDKVKPGDRIQVVGTYRCLPGKKGGYTSG	MAA AGGL+DAELREAQRDYLDFLDDEEDQGVYHGKVRDMISDNQYRLLVNINDLRRRNEKRASRLLSNAFEELIAFQRALKDFVASVDATYAKQYEDFYIGLEGSFGS+HVSPRTL+ACFL CIVCVEGIVTKCSL+RPKVVRSVHYCPATKKTIERRYTDL SLDAFPSSSVYPTKDEENNPLETEFGLSVYKDHQTISIQEMPEKAPAGQLPRSVDVILDDDLVD+VKPGDRIQVVGTYRCLPGKKGGYTSG
371153	Query_1077	3-contig_2619_1	1014	gi|326916787|ref|XP_003204686.1|PREDICTED: fibrocystin-like [Meleagris gallopavo]	XP_003204686	3769	1	920.228	2377	0	172	747	1114	1691	0	0	456	507	2	578	ISWIGLSVMLIGFTMHCECLQTVIHSYLEHNILLLFFSS--GGTLLTISGVGFSQNRSLVSVSINEQTCLVTHLTEETIWCLTPPAANLSNEFSQDVPIRVNILLSNSSLQNVPAAKSITFNYQKALTPLVTAVDLEIVDSSLLLRIQGVNITGSVAKLGVSECELELLHDNETAMCYECSLPLSSLEPGLYPVRVIQRQLGYSRVTAKLQTITVTPQITSIFPSQGSVCGGMLLTISGIALKSRGDLVQVSLDG	VGWYNVSVIINGVAIASNRVEPLIHYISEVFSIEPCCGSFLGGTLLTISGLGFSQNRSLVSVSINEQTCLVTHLAEETIWCLTPPAANFSNEVSQDVPVRVNILVSNSSLQNVPVAKSITFNYQRALTPLVTTVDVEILESSMLLSIQGVNITGSVAKLGDSECELELQRGNESAMFYECSLPLSNLEPGIYPIQVIQRQLGYSHVTARLQTITVTPRITSIFPSDGSICGGMLLTISGIALRSRRDLEQVSLDG	+ W +SV++ G + ++ +IH E + S GGTLLTISG+GFSQNRSLVSVSINEQTCLVTHL EETIWCLTPPAAN SNE SQDVP+RVNIL+SNSSLQNVP AKSITFNYQ+ALTPLVT VD+EI++SS+LL IQGVNITGSVAKLG SECELEL NE+AM YECSLPLS+LEPG+YP++VIQRQLGYS VTA+LQTITVTP+ITSIFPS GS+CGGMLLTISGIAL+SR DL QVSLDG
29551	Query_424	25-contig_45719_1	2145	gi|326916851|ref|XP_003204718.1|PREDICTED: hypothetical protein LOC100539290, partial [Meleagris gallopavo]	XP_003204718	2017	1	2221.82	5756	0	385	2018	190	1786	0	0	1199	1341	111	1671	RALKMILGFGKLTLYLSLKDILFGEITSSSDEEVDCSASTVECILQEDQVQPQSRCNVFKLNEECNRWNKPHGHSVNAEISYNSSRTERIVPIGLETLIKEEKNTKQYGVDTSITNTESNRDCLKENSENMETMKRDLMEAAACELEAREEQKGDIKKMHSEERASSIHSLLHNFELQNQIEICSEVEQME-NVILVRDGGCEGTHEKCGELMKAEIYGLTHEREIPKAVSIPQNVSHSSHEQYLAVFQRKDSEE	RPLPALLSPVQLS-PVATQDALFGELTGSSDEEVDCTASAEECILQEDQVQPQNCCDVFKLNEEWNRWNKPRGHSLDAEISYNLSRTEKIVHISPATLIKEERNTEQCEVATSVTNIESNRDSSEENSDNMETAKRGL-EATACELEAAEERKGDIKEMHNEEKASSIHSVLHSFNLQNQIERCGEVEQTEENAVLVRAGGYNGAHEKYGELMKAE-----HEREIPKAISVPQNVTNLPPEQYHVVLQRKDSEE	R L +L +L+ ++ +D LFGE+T SSDEEVDC+AS ECILQEDQVQPQ+ C+VFKLNEE NRWNKP GHS++AEISYN SRTE+IV I TLIKEE+NT+Q V TS+TN ESNRD +ENS+NMET KR L EA ACELEA EE+KGDIK+MH+EE+ASSIHS+LH+F LQNQIE C EVEQ E N +LVR GG G HEK GELMKAE HEREIPKA+S+PQNV++ EQY V QRKDSEE
126924	Query_1109	31-contig_16291_1	664	gi|326916853|ref|XP_003204719.1|PREDICTED: tensin-3-like [Meleagris gallopavo]	XP_003204719	1451	1	762.681	1968	0	126	546	342	762	0	0	370	393	0	421	VLHTQGPIDGSLYAKVRKKSSSDASIPGVTQGTPFTSSPDHRDYTLSVSSDSEHSTVSIRTDKTEEHLIPGVQRILSPQEKAELDKLLSGFGLEISVSSTRSMADPGSKYSGTHHIVPVQVHVNGDTKLKDRETDILDDEMPNHDLHSVDSIGTLSSSEGQHSTHLGNLSCPKSSQNSLLSDGFGSNTGEDHHNAIAPDLGIGVDPLYERSFGSNELKSTQQLQRNPCVSPQPQAYDPSNYSTHTWVCQQQMVTA	VLHTQGPIDGSLYAKVRKKSSSDSSIPGVAQGIPVASSPEHRDHTLSVSSDSGHSTASIRTDKTEERLMPGVKRVLSPQEKAELDKLLSGFGLEDSIITTRSVTDAGSKYSGTHHIVPAQVHVNGDTKLKDRETDILDDEMPNHDLHSVDSIGTLSSSEGQHSTHLGNLSCPKSSQNSLLSDGFGSNTGEDHHNAIAPDLGIGVDPLYERSFGSTEPKSSQQLQRNPCVSPQPQAYDPSNYSTHTWVCQQQMVTA	VLHTQGPIDGSLYAKVRKKSSSD+SIPGV QG P SSP+HRD+TLSVSSDS HST SIRTDKTEE L+PGV+R+LSPQEKAELDKLLSGFGLE S+ +TRS+ D GSKYSGTHHIVP QVHVNGDTKLKDRETDILDDEMPNHDLHSVDSIGTLSSSEGQHSTHLGNLSCPKSSQNSLLSDGFGSNTGEDHHNAIAPDLGIGVDPLYERSFGS E KS+QQLQRNPCVSPQPQAYDPSNYSTHTWVCQQQMVTA
40424	Query_663	10-contig_37739_1	2334	gi|326916871|ref|XP_003204728.1|PREDICTED: metastasis-associated in colon cancer protein 1-like [Meleagris gallopavo]	XP_003204728	976	1	1240.33	3208	0	234	861	111	739	0	0	596	614	1	629	VNENKMNLDIEWSDLFKHAHTVSKTNPFWNELSASNPFVHDIAASNRNENNKYFPVLREKSYLFSKVSSDGDSLASSGDELNIDCLLRKTSTRRSGRSKSVSDFLDIIDNRRFNSHKPTPQ-TTVSDMTCLQNDREAYKMAWLSHRQLTRSCLDLEAMSHSPGWAQTQATDIHVVCKLNHEGGSVQLPDSDINVHVPVGHVLPGEFQEVGLRAILNPPSSFNNELSSTVSPLIELTLSNLNTKEAIFLEVKVAAK	VNESKMDLDIEWSDLFKHTYTISKTNPFWNELSSSNPFVHDIAASNRNENNKYFSVLKEKSYLFSKVSSDRDSLASSGDELNIDCLLRKSSTRRSGRSKSVSDFLDIIDIRRSNPHKPTLQKTTVSDMTCLQIDREAYKMAWLSHRQLTRSCLDLEAMSHSPGWAQTQAADIHVVCKLNHEGGSVQLPDSDINVHVPVGHVLPGEFQEVGLRAILNPPSSFNNELSSTVSPLIELTLSNLNTKEAIFLEVKVAAK	VNE+KM+LDIEWSDLFKH +T+SKTNPFWNELS+SNPFVHDIAASNRNENNKYF VL+EKSYLFSKVSSD DSLASSGDELNIDCLLRK+STRRSGRSKSVSDFLDIID RR N HKPT Q TTVSDMTCLQ DREAYKMAWLSHRQLTRSCLDLEAMSHSPGWAQTQA DIHVVCKLNHEGGSVQLPDSDINVHVPVGHVLPGEFQEVGLRAILNPPSSFNNELSSTVSPLIELTLSNLNTKEAIFLEVKVAAK
252037	Query_280	9-contig_39369_1	1406	gi|326916925|ref|XP_003204755.1|PREDICTED: sal-like protein 3-like [Meleagris gallopavo]	XP_003204755	1261	1	930.243	2403	0	25	555	27	557	0	0	524	528	0	531	AVPGEGADDGDSGNESRSGSEETNVCEKCCAEFFKWTDFLEHKKNCTKNPLVLIVNEDEAAPPPAEEFPEPSPASSPSDQAESEAAEEGVQLENSESSEVKSTEKEEEPMEVETAEKSFQNQGASNTATPLPQLPEPSPVTNYTMPNTNVTLETLLSTKVAVAQFSQSARSAASASISSGVTAVAIPMILEQLMALQQQQIHQLQLIEQIRSQVAMMNRQPLRPALNPVVAAPGVAGQASNQLQGFATSAAIQLT	AVPGEGADDGDSGNESRSGSEETNVCEKCCAEFFKWTDFLEHKKNCTKNPLVLIVNEDEAAPPPAEEFPEPSPASSPSDQAESEAAEEGVQPENSESSEVKSTEKEEEPMEVETAEKSFQNQGTSNTATPLPQLPEPSPMTSYAMPNTNVTLETLLSTKVAVAQFSQSARSAASASISSGVTAVAIPMILEQLMALQQQQIHQLQLIEQIRSQVAMMNRQPLRPALNPVVAAPGVAGQASNQLQGFATSAAIQLT	AVPGEGADDGDSGNESRSGSEETNVCEKCCAEFFKWTDFLEHKKNCTKNPLVLIVNEDEAAPPPAEEFPEPSPASSPSDQAESEAAEEGVQ ENSESSEVKSTEKEEEPMEVETAEKSFQNQG SNTATPLPQLPEPSP+T+Y MPNTNVTLETLLSTKVAVAQFSQSARSAASASISSGVTAVAIPMILEQLMALQQQQIHQLQLIEQIRSQVAMMNRQPLRPALNPVVAAPGVAGQASNQLQGFATSAAIQLT
285216	Query_10	2-contig_5954_1	513	gi|326916999|ref|XP_003204792.1|PREDICTED: zinc finger protein 40-like [Meleagris gallopavo]	XP_003204792	2721	1	696.041	1795	0	75	440	2345	2710	0	0	341	352	0	366	DQSLRTTTASPYTEIQEEKLPSAPLCSAELRPSQTHLFSHLPLHSQQQAKAPCSMVPVGGLQVVPAGLATYSTFVPIQAGPVQLTIPAVGVIHRTTSGLGEVGCTATGAATNPVGVAEVNSVVPCIPIGQINVPGIQGLSTPSLQPLPPLGMETVNILGLTNTNIAPQMRPPGITLNAVGLQVLAASATPQGKPSPQAHIPGLQILNIALPTLIPSISPVSADGQGSSEPPAAGSKAGDVLQEPAPASFPDVGHV	DQSLRTTTASPYTEIQEEKLPGAPLRSAELRPSQTHLFSHLPLHSQQQAKAPYGMVPVGGLQVVPAGLATYSTFVPIQAGPVQLTIPAVGVIHRTTSGLGEVGCTASGAATNPIGVAEVNSVVPCIPIGQINVPGIQGLSTPSLQPLPPLGMETVNILGLTNTNIAPQMRPPGITLNAVGLQVLTASATPQGKPSPQAHIPGLQILNIALPTLIPSISPVGADGQGASEPPASGSKAGDIQQEPAPASFPDVGHV	DQSLRTTTASPYTEIQEEKLP APL SAELRPSQTHLFSHLPLHSQQQAKAP MVPVGGLQVVPAGLATYSTFVPIQAGPVQLTIPAVGVIHRTTSGLGEVGCTA+GAATNP+GVAEVNSVVPCIPIGQINVPGIQGLSTPSLQPLPPLGMETVNILGLTNTNIAPQMRPPGITLNAVGLQVL ASATPQGKPSPQAHIPGLQILNIALPTLIPSISPV ADGQG+SEPPA+GSKAGD+ QEPAPASFPDVGHV
344398	Query_848	8-contig_10867_1	1035	gi|326917015|ref|XP_003204800.1|PREDICTED: ras-responsive element-binding protein 1-like [Meleagris gallopavo]	XP_003204800	1615	1	1936.38	5015	0	51	1026	218	1193	0	0	960	966	0	976	CDICCITFRTHRGLLRHNAVIHKQLPRDPTGKPFIQNNPSIPAGFHDLGFTDFSCRKFPRISQVWCETNLRRCISEFHRFICETCNKAFPMLSALKLHTETHLMDQGRDKHKLQSTSLPSENPDQKAFMASLGLQYTKDIKPVKQEDDTQDEVQEMRLRALKSNLPQEPGSTGLLSLSPLEAASMGGSFSVLPPTKENIKLLSLQPFQKGFIIQPDSSIVVKPISNESAIELADIQQILKMASSAPPQISLPPLS	CDICCITFRTHRGLLRHNAVIHKQLPRDPTGKPFIQNNPSIPAGFHDLGFTDFSCRKFPRISQVWCETNLRRCISEFHRFICETCNKAFPMLSALKLHTETHVMDQGRDKHKLQSTSLPSENPDQKAFMASLGLQYTKDIKPVKQEDDTQDEVQEMRLRALKSNLPQEPGSTGLLSLSPLEAASMGGPFSVLPPTKENIKLLSLQPFQKGFIIQPDSSIVVKPISNESAIELADIQQILKMASSAPPQISLPPLS	CDICCITFRTHRGLLRHNAVIHKQLPRDPTGKPFIQNNPSIPAGFHDLGFTDFSCRKFPRISQVWCETNLRRCISEFHRFICETCNKAFPMLSALKLHTETH+MDQGRDKHKLQSTSLPSENPDQKAFMASLGLQYTKDIKPVKQEDDTQDEVQEMRLRALKSNLPQEPGSTGLLSLSPLEAASMGG FSVLPPTKENIKLLSLQPFQKGFIIQPDSSIVVKPISNESAIELADIQQILKMASSAPPQISLPPLS
318572	Query_1046	46-contig_2527_1	3305	gi|326917033|ref|XP_003204809.1|PREDICTED: desmoplakin-like [Meleagris gallopavo]	XP_003204809	2829	1	1909.03	4944	0	2118	3079	1764	2725	0	0	941	955	0	962	LLASNRIQESKNQYNHIMQERETLLIKMSALEQDKARLQRLEEELNRLKVSLESESRLKQRLESEKQQILNDLNQWKSQHSRTEESIRKIQCEREKSEREKNSLRSEIERLQMEIKRIEERYRCRLEETAVKSQSELESERLRLQREIEKLKQRPYGSHRSTQTEEDFCIDASKLVFSGLRKKITAMQLYECQLIDKLTLDKLLKGQRSVEEVAADIEPFLKGAGAIAGVSVLPRQKYSFVEAKRNQLLTAENAV	LEASNRIQESKNQYNHIMQERETLLIKMSALEQDKARLQRLEEELNRLKVNLESESRLKQRLENEKQQILNDLNQWKSQHSRTEESIRKIQCEREKSEREKNTLRSEIERLQMEIKRIEERYRCRLEETAVKNQSELESERLRLQREIEKLKQRPYGSHRSTQTEEDFCIDASKLVFNGLRKKITAMQLYECQLIDKLTLDKLLKGQRSVEEVTADIEPFLKGAGAIAGVSVLPRQKYSFVEAKRNQLLTAENAV	L ASNRIQESKNQYNHIMQERETLLIKMSALEQDKARLQRLEEELNRLKV+LESESRLKQRLE+EKQQILNDLNQWKSQHSRTEESIRKIQCEREKSEREKN+LRSEIERLQMEIKRIEERYRCRLEETAVK+QSELESERLRLQREIEKLKQRPYGSHRSTQTEEDFCIDASKLVF+GLRKKITAMQLYECQLIDKLTLDKLLKGQRSVEEV ADIEPFLKGAGAIAGVSVLPRQKYSFVEAKRNQLLTAENAV
209907	Query_105	36-contig_3319_1	709	gi|326917452|ref|XP_003205013.1|PREDICTED: disks large-associated protein 1-like [Meleagris gallopavo]	XP_003205013	975	1	682.559	1760	0	19	355	1	344	0	0	320	325	7	344	MKGLSSSRSHHHGVTCDPPCDSLPHHSDRKPYLLNPVDPHPADHPYYTQRNSFQAECMVPYNDQIASSTFPRRHYNSHHELKDECALVPHGTVNKSNRIPANLLDQFERQLPLNRDGYHTLQYKRTAMEHRSDSPGRIRHLVHSVQKLFTKSHSLEGPSKGSVNGSKASPEESQTMRYGKRSKSKERRSEGKPRSNASGWWSSDDNLDNDVCIYHGPSGVMTMGRCPDRSSSQYFMEAYNTISEHTVKSSRSNND	MKGLSSSRSHHHGVTCDPPCDSLPHHSDRKPYLLNPVDPHPADHPYYTQRNSFQAECMVPYNDQIASSTFPRRHYNSHHELKDECALVPHGTANKTNRIPANLLDQFERQLPLNRDGYHTLQYKRTAMEHRSDSPGRIRHLVHSVQKLFTKSHSLEGPSKGSVNGSKASPEESQTMRYGKRSKSKERRSEGKPRSNASGWWSSDDNLDNDVCIYHGPSGVMTMGRCPDRSSSQYFMEAYNTISEHTVKSSRSNND	MKGLSSSRSHHHGVTCDPPCDSLPHHSDRKPYLLNPVDPHPADHPYYTQRNSFQAECMVPYNDQIASSTFPRRHYNSHHELKDECALVPHGT NK+NRIPANLLDQFERQLPLNRDGYHTLQYKRTAMEHRSDSPGRIRHLVHSVQKLFTKSHSLEGPSKGSVNGSKASPEESQTMRYGKRSKSKERRSEGKPRSNASGWWSSDDNLDNDVCIYHGPSGVMTMGRCPDRSSSQYFMEAYNTISEHTVKSSRSNND
129748	Query_39	6-contig_24903_1	880	gi|326917582|ref|XP_003205076.1|PREDICTED: putative Polycomb group protein ASXL3-like [Meleagris gallopavo]	XP_003205076	2220	1	1009.59	2609	0	23	602	366	945	0	0	537	556	0	580	LFLFRLGMSRGESLKLTATQNNDEDDSNSLCGSSGTPGPSKQATFEEREQKGTKTPALPEKDNRTPLCNMEQVPVKNLMAETEDILIPEESIIQEEIAEEVETSICECQEENHKTEQEFSEDSVSPAGTNEETEAVQLVDSAESCVMMNDVTDTASHIEIKVELKSECPQEEMSVVIDQLEDCVSPARSASSTNSVSDTAEKDSESAKELIVPEMQNAALEGNLFTGGGIAVDMELQSDPEEQSSENACISETSF	FYGEKLGMSRGESLKLTTVQNNNEDESSSLCGSSGTPGPSKQATFEEHEQKDTKTPALPEKDSSPSLCNMEQVPVKNLVAETEDILIPEESIIQEEIAEEVETSICECQEENYKTEQEFSEESESPSGTNEETEAVQLADSAESCVMMNDVTDTASHVEMKVELKSECPQEEMSVVIDQLEDCVSPARSASSTNSVSDTAEKDSESAKELIAPEMQNAALEGSLFTGGGIAVDMELQSDPEEQSSDNACISETSF	+ +LGMSRGESLKLT QNN+ED+S+SLCGSSGTPGPSKQATFEE EQK TKTPALPEKD+ LCNMEQVPVKNL+AETEDILIPEESIIQEEIAEEVETSICECQEEN+KTEQEFSE+S SP+GTNEETEAVQL DSAESCVMMNDVTDTASH+E+KVELKSECPQEEMSVVIDQLEDCVSPARSASSTNSVSDTAEKDSESAKELI PEMQNAALEG+LFTGGGIAVDMELQSDPEEQSS+NACISETSFS
299172	Query_343	42-contig_8858_1	1094	gi|326917660|ref|XP_003205114.1|PREDICTED: protein FAM110B-like [Meleagris gallopavo]	XP_003205114	370	1	686.797	1771	0	461	797	1	337	0	0	336	337	0	337	MPTETLPTGSMVKPVSPAVTFTSAVPLRILNKGPDYFRRQAEPNPKRLSAVERLEADKAKYVKSQEVINAKQEPVKPAVLAKPPVCPAAKRALGSPTLKVFSNNAKTESGVQRENLKLEILKNIINSSEGSSSGSGHKHGPRNWPPHRADSTELNRHSFAESLKVYPTQGRSSPQESSSNVSRRLLDQSADTFLHVSHSSSDIRKVTSAKPLKAIPCSSSAPPLPPKPKIAAIATLKSPEIEAVESGCGVSRRPS	MPTETLPTGSMVKPVSPAVTFTSAVPLRILNKGPDYFRRQAEPNPKRLSAVERLEADKAKYVKSQEVINAKQEPVKPAVLAKPPVCPAAKRALGSPTLKVFSNNAKTESGVQRENLKLEILKNIINSSEGSSSGSGHKHGPRNWPPHRADSTELNRHSFAESLKVYPTQGRSSPQESSSNVSRRLLDQSAETFLHVSHSSSDIRKVTSAKPLKAIPCSSSAPPLPPKPKIAAIATLKSPEIEAVESGCGVSRRPS	MPTETLPTGSMVKPVSPAVTFTSAVPLRILNKGPDYFRRQAEPNPKRLSAVERLEADKAKYVKSQEVINAKQEPVKPAVLAKPPVCPAAKRALGSPTLKVFSNNAKTESGVQRENLKLEILKNIINSSEGSSSGSGHKHGPRNWPPHRADSTELNRHSFAESLKVYPTQGRSSPQESSSNVSRRLLDQSA+TFLHVSHSSSDIRKVTSAKPLKAIPCSSSAPPLPPKPKIAAIATLKSPEIEAVESGCGVSRRPS
224853	Query_758	2-contig_20496_1	2251	gi|326917666|ref|XP_003205117.1|PREDICTED: LOW QUALITY PROTEIN: chromodomain-helicase-DNA-binding protein 7-like [Meleagris gallopavo]	XP_003205117	3011	1	3846.2	9973	0	44	2240	706	3001	0	0	2053	2077	235	2364	DSETSAAKKKVNKGKEGSENSDLDKTPPPSPHPEDEDDPGVQKRRSSRQVKRKRYTEDLEFKISDEEADDADAAGRDSPSNTSQSEQQESADAEGPVVEKIMSSRSVKKKMENGEEVEVEEFYVKYKNFSYLHCQWASVEELDKDKRIQQKIKRFKAKQGQNKFLSEIDDELFNPDYVEIDRILDFSRSTDDNGEPVTHYLVKWCSLPYEDSTWELKQDIDQAKIEEFEKLMSREPEMERVERPPADDWKKSESS	DSETSAAKKKVNKGKEGSENSDLDKTPPPSPHPEDEDDPGVQKRRSSRQVKRKRYTEDLEFKISDEEADDADAAGRDSPSNTSQSEQQESADAEGPVVEKIMSSRSVKKKMENGEEVEIEEFYVKYKNFSYLHCQWASVEELDKDKRIQQKIKRFKAKQGQNKFLSEIDDELFNPDYVEIDRILDFSRSTDDNGEPVTHYLVKWCSLPYEDSTWELKQDIDQAKIEEFEKLMSREPEMERVERPPADDWKKSESS	DSETSAAKKKVNKGKEGSENSDLDKTPPPSPHPEDEDDPGVQKRRSSRQVKRKRYTEDLEFKISDEEADDADAAGRDSPSNTSQSEQQESADAEGPVVEKIMSSRSVKKKMENGEEVE+EEFYVKYKNFSYLHCQWASVEELDKDKRIQQKIKRFKAKQGQNKFLSEIDDELFNPDYVEIDRILDFSRSTDDNGEPVTHYLVKWCSLPYEDSTWELKQDIDQAKIEEFEKLMSREPEMERVERPPADDWKKSESS
324260	Query_282	18-contig_6484_1	881	gi|326917867|ref|XP_003205216.1|PREDICTED: oxidative stress-induced growth inhibitor 2-like, partial [Meleagris gallopavo]	XP_003205216	539	1	689.493	1778	0	466	813	192	539	0	0	328	340	2	349	RNIKSDRVMPEEIACYYKHYVKVMGLQKNFRDNVYVTSVSRLYRGKDDEDRSQLNENISTQHSEMEEGQKPLLKRNWEVRGYQRAADGSHVPFCLFAENVALATGTFDSPGRLHVEGEDFPFVLHSMSDFGAAVSKGKLRGKADPVLIVGAGLSAADAVLCAYNNSIPVIHVFRRRVTDSSLIFKQLPQKLYPEYHKVYHMMCTQSHSGDSNLHSAYTSFPEHNVLSFKPEMKCVLQSASGLKKILKFSVALVLI	RNIKSDRVMPEEIACYYKHYVKVMGLQKNFRDNVYITSVSKLYRG-DDEDRSQLNENIPTQHLEMEDGQKPLIKRNWEVRGYQRATDGSHVPFCLFAENVALATGTFDSPGRLHIEGEDFPFVLHSMSDFGAAVSKGKLRGKADPVLIVGAGLTAADAVLCAYNNNIPVIHVFRRRVTDSSLIFKQLPKKLYPEYHKVYQMMCTQSHTGDSHLHSAYTSFPEHNVLSFKPEMKCVLQSASGLKKILKFSVALVLI	RNIKSDRVMPEEIACYYKHYVKVMGLQKNFRDNVY+TSVS+LYRG DDEDRSQLNENI TQH EME+GQKPL+KRNWEVRGYQRA DGSHVPFCLFAENVALATGTFDSPGRLH+EGEDFPFVLHSMSDFGAAVSKGKLRGKADPVLIVGAGL+AADAVLCAYNN+IPVIHVFRRRVTDSSLIFKQLP+KLYPEYHKVY MMCTQSH+GDS+LHSAYTSFPEHNVLSFKPEMKCVLQSASGLKKILKFSVALVLI
117309	Query_838	1-contig_39783_1	834	gi|326918134|ref|XP_003205346.1|PREDICTED: thyroglobulin-like, partial [Meleagris gallopavo]	XP_003205346	2518	1	1265.37	3273	0	56	830	265	1091	0	0	636	686	74	838	QRALSRIFYGPAGYFSQPGLFSTPDAQSEKRAGFSRPCPPSFKELFLDSGLSSPIMQSPYASQSPGLESILSEAITGMFPSRELAQVALQFTANPKRFQENLFGGKFLKNMIQFNFTGALGTSGKYSIGQFFAQEDTTGRNSSQGLLQSAEEFSLEVSKGSSILSQALVGSFGRTVTLQDNQNKMKFLSSVLELPEFFAFLQQVISVPKSISEDLGEVMKLALGSKDCGEEPRDMFVPTCTKEGRYEEVQCYAGE	QRALSRIFYGPAGYFSQSDLFSTPDVQSEKRAGFSRPCPPSFKELFLDSGLSSPIMQSPYVSQIPGLESILSEAISGMFSSRELAQVALQFTASPKRFQENLFGGKFLKNMIQFNFTGTLGTSGKYSIEQFFTQEDATERNSSQGLLQSAAAFPLEISKGSSILSQALVDSFGRTVTLQDNQNMIKFLSSVLELPEFFTFLQQVISVPKSIAEDLGEVVKLALGSKDCGEEPRDLFVPTCTKEGRYEEVQCYAGE	QRALSRIFYGPAGYFSQ LFSTPD QSEKRAGFSRPCPPSFKELFLDSGLSSPIMQSPY SQ PGLESILSEAI+GMF SRELAQVALQFTA+PKRFQENLFGGKFLKNMIQFNFTG LGTSGKYSI QFF QED T RNSSQGLLQSA F LE+SKGSSILSQALV SFGRTVTLQDNQN +KFLSSVLELPEFF FLQQVISVPKSI+EDLGEV+KLALGSKDCGEEPRD+FVPTCTKEGRYEEVQCYAGE
33769	Query_286	1-contig_18427_1	553	gi|326918252|ref|XP_003205404.1|PREDICTED: guanylate cyclase soluble subunit alpha-3-like [Meleagris gallopavo]	XP_003205404	688	1	671.389	1731	0	218	538	361	681	0	0	318	321	0	321	VMDLKGQMIYILESSAILFLGSPCVDRLEDFTGRGLYLSDIPIHNALRDVVLIGEQARAQDGLKKRLGKLKATLEQAHQALEEEKKKTVDLLFSIFPGEVAQQLWQGQVVQAKKFNNVTMLFSDIVGFTAICSQCSPMQVITMLNELYTRFDYQCGELDVYKVETIGDAYCVAGGLHKESETHAVQIALMALKMMELSDEVVSPHGEPIKMRIGLHSGSVFAGVVGVKMPRYCLFGNNVTLANKFESCSVPRKIN	VMDLKGQMIYILESSAILFLGSPCVDRLEDFTGRGLYLSDIPIHNALRDVVLIGEQARAQDGLKKRLGKLKATLEQAHQALEEEKKKTVDLLFSIFPGEVAQQLWQGQVVQAKKFNNVTMLFSDIVGFTAICSQCSPMQVITMLNELYTRFDYQCGELDVYKVETIGDAYCVAGGLHKESETHAVQIALMALKMMELSDEVVSPHGEPIKMRIGLHSGSVFAGVVGVKMPRYCLFGNNVTLANKFESCSVPRKIN	VMDLKGQMIYILESSAILFLGSPCVDRLEDFTGRGLYLSDIPIHNALRDVVLIGEQARAQDGLKKRLGKLKATLEQAHQALEEEKKKTVDLLFSIFPGEVAQQLWQGQVVQAKKFNNVTMLFSDIVGFTAICSQCSPMQVITMLNELYTRFDYQCGELDVYKVETIGDAYCVAGGLHKESETHAVQIALMALKMMELSDEVVSPHGEPIKMRIGLHSGSVFAGVVGVKMPRYCLFGNNVTLANKFESCSVPRKIN
96055	Query_965	1-contig_31115_1	855	gi|326918279|ref|XP_003205417.1|PREDICTED: rap guanine nucleotide exchange factor 2-like [Meleagris gallopavo]	XP_003205417	1491	1	1218.37	3151	0	10	654	433	1099	0	0	621	622	62	687	ILEVNGQNFENIQLSKAMEILRNNTHLSIT----------------------------------ASRYSIPDLAVDVEQVIGLEKVNKKSKANTVGGRNKLKKILDKTRISILPQKPYNDIGIGQSQDDSIVGLRQTKHIPPALPVSGTLSSSNPDLLQSHHRILDFNTTPDRWMNNESVMMGKIDLLVVKDLPDQVLRVFKADQQSRYIMISKDTTAKEVVIQAIREFALTATPDAYSLCEVSVTPEGVIKQRR	ILEVNGQNFENVQLSKAMEILRNNTHLSITVKTNLFVFKELLTRLSEEKRNGAPHLPKIGDIKKASRYSIPDLAVDVEQVIGLEKVNKKSKANTVGGRNKLKKILDKTRISILPQKPYNDIGIGQSQDDSIVGLRQTKHIPPALPVSGTLSSSNPDLLQSHHRILDFNTTPD--------------------LPDQVLRVFKADQQSRYIMISKDTTAKEVVIQAIREFALTATPDAYSLCEVSVTPEGVIKQRR	ILEVNGQNFEN+QLSKAMEILRNNTHLSIT ASRYSIPDLAVDVEQVIGLEKVNKKSKANTVGGRNKLKKILDKTRISILPQKPYNDIGIGQSQDDSIVGLRQTKHIPPALPVSGTLSSSNPDLLQSHHRILDFNTTPD LPDQVLRVFKADQQSRYIMISKDTTAKEVVIQAIREFALTATPDAYSLCEVSVTPEGVIKQRR
239256	Query_540	42-contig_4376_1	723	gi|326918368|ref|XP_003205461.1|PREDICTED: ubiquitin carboxyl-terminal hydrolase 38-like [Meleagris gallopavo]	XP_003205461	1027	1	665.226	1715	0	80	466	523	908	0	0	346	360	1	387	FLFDFRLHEEERTLKALSSAKAAESRKNEESQAQETVHKAQVFAEALCMGSEERTLIERMFGGKLKTTICCLNCKSTSQKEEAFTDLSLAFCPPTSLESVSSKCVECSEIKDGPVVQTSISATSAGETPLNSSEASDGCNAVTNEAALKDFSAESNSEAKSEFNKDQDNGDVSPALVGKNTPSVTDLLNYFLAPEILSGDNKYYCEKCASLQNAEKTMQIVEEPEYLILTLLRFSYDPKCHIRRKILDSVSLPLL	FLLN-RLHEEEKTLKALSSAKAAESRRNEESQAQETIHKAQVFAEALCKGSEERTLIERMFGGKLKTTICCLNCKSTSQKEEAFTDLSLAFCPPTSLESASVKCVEHAEMKDSSVVQTTISASSAGETPLSRLEINSGCNALTNEGILKDFSAEPNSETKSEFNKDQDNRDVSSALVGKSTPSVTDLLNYFLAPEILSGDNKYYCEKCASLQNAEKTMQIVEEPEYLILTLLRFSYDPKCHVRRKILDSVSLPLL	FL + RLHEEE+TLKALSSAKAAESR+NEESQAQET+HKAQVFAEALC GSEERTLIERMFGGKLKTTICCLNCKSTSQKEEAFTDLSLAFCPPTSLES S KCVE +E+KD VVQT+ISA+SAGETPL+ E + GCNA+TNE LKDFSAE NSE KSEFNKDQDN DVS ALVGK+TPSVTDLLNYFLAPEILSGDNKYYCEKCASLQNAEKTMQIVEEPEYLILTLLRFSYDPKCH+RRKILDSVSLPLL
102609	Query_724	3-contig_19887_1	459	gi|326918556|ref|XP_003205554.1|PREDICTED: ufm1-specific protease 2-like [Meleagris gallopavo]	XP_003205554	462	1	636.336	1640	0	30	370	53	393	0	0	319	328	0	341	SLYVWPNNGINTIPELTDDSACTEIKRFIHFDQDDETRRKLGKKKDKKLQDTQQVINIDLMLEMTSSLDALSPVIERENKEHHYVNMTLPVDAVVSVSPEETWGKVQNLLVKAIHKQLTDMERCIMKYMKGTSIVVPEQFHFMVPGKNHLVTVSYPTGISDDQLESYRKELHELFNVPCDRPYFKRANAYRFPDEPYKDGYLRNPHLHLTPPGTESGGVYLVHGTYSYHHYMQDRIDDSGWGCAYRSLQTVCSWF	SVYVWPNNGINTIPELTDDSACKEIKRFIHFDQDDETPRKLVKKKDKKLQDMQQVINIDLMLEMTPSLDALAPVIERENKEHHYINMTLPVDVVVSVSPEETWGKVQNLLVKAIHKQLTDMERCIMKYMKGTSIVVPEQFHFMLPGKNHLVTISYPTGISDDQLESYRKELHELFNLPCDRPYFKRANAYHFPDEPYKDGYLRNPHLHLNSPGSESGVVYLVQGIYSYHHYMQDRIDDSGWGCAYRSLQTICSWF	S+YVWPNNGINTIPELTDDSAC EIKRFIHFDQDDET RKL KKKDKKLQD QQVINIDLMLEMT SLDAL+PVIERENKEHHY+NMTLPVD VVSVSPEETWGKVQNLLVKAIHKQLTDMERCIMKYMKGTSIVVPEQFHFM+PGKNHLVT+SYPTGISDDQLESYRKELHELFN+PCDRPYFKRANAY FPDEPYKDGYLRNPHLHL PG+ESG VYLV G YSYHHYMQDRIDDSGWGCAYRSLQT+CSWF
366725	Query_73	13-contig_13064_1	1193	gi|326918980|ref|XP_003205762.1|PREDICTED: synaptopodin-2 [Meleagris gallopavo]	XP_003205762	1070	1	663.685	1711	0	799	1169	162	533	0	0	359	362	1	372	SESLSEKQVKEAKSKCKSIALLLTAAPNPNSKGVLMFKKRRQRARKYTLVSYGTGELERDEDEGEEGEVEEGDKENTFEVSFLATSESEIDEDFFTDIDNDNKIVTFDWDSGLPEVEKKTKSGDEMQTLPETTGKGALMFARRRQRMDQITAEQEEMKARTVHTEEQREVTVSENFQKVSSSAYQTKEEETLRQQPCISKSYADVSQNHSKIVQQNGFGLAPDTNLSFQSSEAQKAASLNRTAKPFPFGVQNRAA	SESLSEKQVKEAKSKCKSIALLLTAAPNPNSKGVLMFKKRRQRARKYTLVSYGTGELERDEDEGEEGEVEEGDKENTFEVSLLATSESEIDEDFFSDIDNDKKIVTFDWDSGLLEVEKKTKSGDEMQTLPETTGKGALMFARRRQRMDQITAEQEEMKARTVHAEEQREVTVSENFQKVSSSAYQTKEEEMLRQQPCISKSYADVSQNDGKIVQQNGFGVAPDTSLSFQSSEAQKAASLNRTAKPFPFGVQNRAA	SESLSEKQVKEAKSKCKSIALLLTAAPNPNSKGVLMFKKRRQRARKYTLVSYGTGELERDEDEGEEGEVEEGDKENTFEVS LATSESEIDEDFF+DIDND KIVTFDWDSGL EVEKKTKSGDEMQTLPETTGKGALMFARRRQRMDQITAEQEEMKARTVH EEQREVTVSENFQKVSSSAYQTKEEE LRQQPCISKSYADVSQN KIVQQNGFG+APDT+LSFQSSEAQKAASLNRTAKPFPFGVQNRAA
113008	Query_545	11-contig_15641_1	1362	gi|326919004|ref|XP_003205774.1|PREDICTED: LOW QUALITY PROTEIN: ankyrin-2-like [Meleagris gallopavo]	XP_003205774	3909	1	1727.99	4474	0	7	953	1454	2401	0	0	892	916	1	948	KDDETESTETSILKSHLVNEVPVLASPDLLSEVSEMKQDLIKMTAILTTDPSDKSGSIKVKDLGKPNEEEPGEPFEIVERVKEDLEKVNEILRGGSYTREEHAL-KSLPSQEFVEEEWVIVSDEEIEEARRNAPVEVTEPVCVEVRIDKETTDSGKKDMTGMVDYLSEDLEKYVSLHEVQPQALQEDIVEERFEAVVINRDSEKEGRESPTTKTPSPQEQHKPTLEIKKPVRTKLRDKHKPKEGKMHSTEQQPGI	KNDETESTETSILKSHLVNEVPVLASPDLLSEVSEMKQDLIKMTAILTTDPSDKSGSIKVKDLGKATEEEPGEPFEIVERVKEDLEKVNEILRGGSYTREEHALQKSLSRQEFVEEEWVIVSDEEIEEARRNAPVEVTEPICVEVRIDKETTEMEKKDMTGMVDYLTEDLNKYVSLHEVQPQALQEDMVEERFEAVVISRDSEKEGQESPTTETLSPQEQHKPALEIKKPVRTKLRDKHKQKEGKMHSSEQQPGL	K+DETESTETSILKSHLVNEVPVLASPDLLSEVSEMKQDLIKMTAILTTDPSDKSGSIKVKDLGK EEEPGEPFEIVERVKEDLEKVNEILRGGSYTREEHAL KSL QEFVEEEWVIVSDEEIEEARRNAPVEVTEP+CVEVRIDKETT+ KKDMTGMVDYL+EDL KYVSLHEVQPQALQED+VEERFEAVVI+RDSEKEG+ESPTT+T SPQEQHKP LEIKKPVRTKLRDKHK KEGKMHS+EQQPG+
252694	Query_496	3-contig_10691_1	558	gi|326919013|ref|XP_003205778.1|PREDICTED: arylsulfatase J-like [Meleagris gallopavo]	XP_003205778	573	1	892.493	2305	0	61	482	108	529	0	0	421	422	0	422	YQIHTGLQHSIIRPTQPNCLPLDNVTLPQKLKEVGYSTHMVGKWHLGFYRRECMPTQRGFDTFFGSLLGSGDYYTHFKCDSPGICGYDLYENDNAAWDHDNGIYSTQMYTQKVQQILASHDPRKPIFLYIAYQAVHSPLQAPGKYFEHYRSINNINRRRYAAMLACLDEAINNVTLALKKYGYYDNSIIIYSSDNGGQPMAGGSNWPLRGSKGTYWEGGIRAVGFVHSPLLKNKGSVCKELVHITDWFPTLITLA	YQIHTGLQHSIIRPTQPNCLPLDNVTLPQKLKEVGYSTHMVGKWHLGFYRRECMPTQRGFDTFFGSLLGSGDYYTHFKCDSPGICGYDLYENDNAAWDHDNGIYSTQMYTQKVQQILASHNPRKPIFLYIAYQAVHSPLQAPGKYFEHYRSINNINRRRYAAMLACLDEAINNVTLALKKYGYYDNSIIIYSSDNGGQPMAGGSNWPLRGSKGTYWEGGIRAVGFVHSPLLKNKGSVCKELVHITDWFPTLITLA	YQIHTGLQHSIIRPTQPNCLPLDNVTLPQKLKEVGYSTHMVGKWHLGFYRRECMPTQRGFDTFFGSLLGSGDYYTHFKCDSPGICGYDLYENDNAAWDHDNGIYSTQMYTQKVQQILASH+PRKPIFLYIAYQAVHSPLQAPGKYFEHYRSINNINRRRYAAMLACLDEAINNVTLALKKYGYYDNSIIIYSSDNGGQPMAGGSNWPLRGSKGTYWEGGIRAVGFVHSPLLKNKGSVCKELVHITDWFPTLITLA
187882	Query_1011	17-contig_22639_1	2031	gi|326919108|ref|XP_003205825.1|PREDICTED: protocadherin Fat 1-like [Meleagris gallopavo]	XP_003205825	4590	1	1943.32	5033	0	698	1832	1980	3125	0	0	979	1027	25	1153	FTQSSYSAVVQENSTEAKTIAVVTAIGNQLNEPLFYHILNPDSRFKISPTSGVLSTTGIPFDREQQESFDVVIEVTEEHKPSVVAHIVVKVTVEDVNDNVPFFVNLPYYAAVKVDSEVGYVIRHVTAVDKDTGRNGEVHYYLKEHHEHFQIDPSGEISLKKKFQPDTVNKEYLVTVVAKDGGEPAFSAEVVVPITVMNKAMPVFEKPFYSAEIPENVQLHSPVVHVQANSPEGLKVFYSITDGDPFNQFMINFNT	FTQSSYSAVVQENSTEAKTIAVITAIGNQINEPLFYHILNPDSRFKVSPTSGVLSTTGIPFDREQQESFDVVIEVTEEHKPSVVAHIVVKVTVEDVNDNAPLFVNLPYYAAVKVDSEVGYVIRRVTAIDKDAGRNGEVHYYLKEHHEHFQIDPSGEISLKKKFEPDTVNKEYLVTVVAKDGGEPAFSAEVIVPITVMNKAMPVFEKPFYSAEIPENIQLHSPVVHVQANSPEGLKVFYSITDGDPFNQFMINFNT	FTQSSYSAVVQENSTEAKTIAV+TAIGNQ+NEPLFYHILNPDSRFK+SPTSGVLSTTGIPFDREQQESFDVVIEVTEEHKPSVVAHIVVKVTVEDVNDN P FVNLPYYAAVKVDSEVGYVIR VTA+DKD GRNGEVHYYLKEHHEHFQIDPSGEISLKKKF+PDTVNKEYLVTVVAKDGGEPAFSAEV+VPITVMNKAMPVFEKPFYSAEIPEN+QLHSPVVHVQANSPEGLKVFYSITDGDPFNQFMINFNT
180147	Query_1020	6-contig_23067_1	1118	gi|326919360|ref|XP_003205949.1|PREDICTED: probable G-protein coupled receptor 125-like, partial [Meleagris gallopavo]	XP_003205949	957	1	674.085	1738	0	116	468	545	896	0	0	330	341	1	353	CWMAWEPSLGAFYGPASFIIFINCMYFLSIFVQLKRHPERKYELKEPAEEQQRLAANEHGELTHQDSLSVSLVSTSALENEHSFQAQLMGVGLTLLLYVAVWIFGALSVSLYYPMDLIFSCFFGATCLSLSAFLMVHHCVNREDVRHAWITTCCPGRSTYSVQVNVQPSSSSGTNGETPKCTNSSAESSCTNKSASSLKNSSQGCKLTNLQAAAAQCHSAALPLNTGPQLDNSLTEHSVDNDIKMHVAPLEVQFR	CWMAWEPSLGAFYGPASFIIFINCMYFLSIFIQLKRHPERKYELKEPAEEQQRLATNEHGELTHQDSLSVSLVSTSALENEHSFQAQLMGVSLTLLLYIALWIFGALSVSLYYPMDLIFSCFFGATCLSLSAFLMVHHCVNREDVRHAWITTCCPGRSTYSVQVNVQPSSSNGTNGETPKCTNSSAESSCTNKSASSLKNSSQGCKLTNLQAAAAQCHSTSLPLNTGPQLDNSLTEHSVDNDIKMHVAPLEVQFR	CWMAWEPSLGAFYGPASFIIFINCMYFLSIF+QLKRHPERKYELKEPAEEQQRLA NEHGELTHQDSLSVSLVSTSALENEHSFQAQLMGV LTLLLY+A+WIFGALSVSLYYPMDLIFSCFFGATCLSLSAFLMVHHCVNREDVRHAWITTCCPGRSTYSVQVNVQPSSS+GTNGETPKCTNSSAESSCTNKSASSLKNSSQGCKLTNLQAAAAQCHS +LPLNTGPQLDNSLTEHSVDNDIKMHVAPLEVQFR
49411	Query_794	31-contig_11112_1	2233	gi|326919366|ref|XP_003205952.1|PREDICTED: biorientation of chromosomes in cell division protein 1-like [Meleagris gallopavo]	XP_003205952	2872	1	3309.62	8580	0	173	2194	556	2575	0	0	1726	1840	6	2024	QTCEKNSSKELKHNHGKTETSKQLRRLSESVHSAEENKTDSKVEKEHKRKISISLHTEGTQQDIETKDPKRQLDRAEVNTDELQKQKILFKNEKHPKKDSDTEIQHTRSATRKEAKSYRDKNEKEVMALEDKLSLKYKCKGDSIHKTADDVELHSSEKSLKGEDGAQKHNQQMKVSSDDKSERKSKHRSERKISVTGKDGKGISESTLKAEELLRKESKKDRHLSTEKSRAEYKSKRSLSDSRPQKDSISASKQF	ETCEKNSSKELKHNHGKTETSKPLRRLSESVHSAEENKTDSKVEKEHKRKISTSLHTEGTQQDIETKDPKRQLERAEANTDELQKQKTIFKNEKHPKKDSDTEIQHMRNAAKKEAKSYRDKNEKEVTALEDKLSLKHKCKGDNIHKSIEDVELHSSEKSLKGEDGAQKHSQQMKNSSDDKSERKSKHRSERKISVTGKDGKGISDSTSKAEELLRKENKKDRHLSTEKSRAEYKSKRSLSDSRPQKDSISASKQL	+TCEKNSSKELKHNHGKTETSK LRRLSESVHSAEENKTDSKVEKEHKRKIS SLHTEGTQQDIETKDPKRQL+RAE NTDELQKQK +FKNEKHPKKDSDTEIQH R+A +KEAKSYRDKNEKEV ALEDKLSLK+KCKGD+IHK+ +DVELHSSEKSLKGEDGAQKH+QQMK SSDDKSERKSKHRSERKISVTGKDGKGIS+ST KAEELLRKE+KKDRHLSTEKSRAEYKSKRSLSDSRPQKDSISASKQ
42499	Query_478	2-contig_6435_1	1258	gi|326919410|ref|XP_003205974.1|PREDICTED: zinc finger and BTB domain-containing protein 49-like [Meleagris gallopavo]	XP_003205974	763	1	715.687	1846	0	54	441	27	420	0	0	351	359	6	394	CVWVYRTTC------VLEHLSYFIRTLFQNSSGQKNDVFHLDIKNVGGIGQILDFMYTSHLDLSQDNVQAMLDIAQCLQVQNVLNICHTFLKSSTGIEQTTSMPCNSVFSLQNSLTADTGCANDSYGANLLQECSSDTQANKVLADHHSHASQSVNLHTPSGDLQKQSHNSLDSSCTELPFKQPNYYYKLRNFYSKQFYKQNACSNNERVAEQSFSYNTSTEINAVQSNSCPVSQPECILETSEHLPSNFLVQSL	CMLVVKGVCFKAHKNVLAAFSQYFRTLFQNSSGQKNDVFHLDIKNVGGIGQILDFMYTSHLDLSQDNVQAMLDIAQCLQVQNVLNICHTFLKSSTAIEQTTNMPCNSVFSLQNSLTADTSCTNDSYGTNLLQECSSDAQANKVLADHHSHTSQSVNLHTPSGDLQKQSHNSLDGNCTELPFKQPNYYYKLRNFYSKQFYKQNACSNNERVAEHSFSYNTSTEINTVQSNSCPVSHPECILETSEHLPSNFLVQPL	C+ V + C VL S + RTLFQNSSGQKNDVFHLDIKNVGGIGQILDFMYTSHLDLSQDNVQAMLDIAQCLQVQNVLNICHTFLKSST IEQTT+MPCNSVFSLQNSLTADT C NDSYG NLLQECSSD QANKVLADHHSH SQSVNLHTPSGDLQKQSHNSLD +CTELPFKQPNYYYKLRNFYSKQFYKQNACSNNERVAE SFSYNTSTEIN VQSNSCPVS PECILETSEHLPSNFLVQ L
286093	Query_385	1-contig_31193_1	683	gi|326919467|ref|XP_003206002.1|PREDICTED: actin filament-associated protein 1-like isoform 1 [Meleagris gallopavo]	XP_003206002	815	1	993.416	2567	0	124	670	292	814	0	0	499	504	44	557	ISDIPNRMEQLKRKKSSKTEAKGTVTKVTGKKITKIIGLGKKKPSTDEQTSSAEEDVPTCVKSEKVTSMCKPNSANLFLVAKQNEPILCGGFLEGYLNVLSNNRWRERWCRVKDNKLIFHKDRTDLKTHIVSIPLRGCEVIPGLDSKHPLTFRLLRNGQE-----ASSSEDMGRWIGMLLAETGSSTDPGALHYDYIDVEMTASVIQAAKQTFCFMNRRVISTNPYRGSTANGYACPSGMALHYDDVPCINGSWE	ITTVCNGKEQVKRKKSSKTEAKGTVTKVTGKKITKIIGLGKKKPSTDEQTSSAEEDVPTC----------------------------------GYLNVLSNNRWRERWCRVKDNKLIFHKDRTDLKTHIVSIPLRGCEVIPGLDSKHPLTFRLLRNGQEVAVLEASSSEDMGRWIGMLLAETGSSTDPGALHYDYIDVEMTASVIQAAKQTFCFMNRRVISTNPYRGSTANGYACPSGMALHYDDVPCINGSWE	I+ + N EQ+KRKKSSKTEAKGTVTKVTGKKITKIIGLGKKKPSTDEQTSSAEEDVPTC GYLNVLSNNRWRERWCRVKDNKLIFHKDRTDLKTHIVSIPLRGCEVIPGLDSKHPLTFRLLRNGQE ASSSEDMGRWIGMLLAETGSSTDPGALHYDYIDVEMTASVIQAAKQTFCFMNRRVISTNPYRGSTANGYACPSGMALHYDDVPCINGSWE
348140	Query_420	1-contig_4967_1	494	gi|326919601|ref|XP_003206068.1|PREDICTED: SET and MYND domain-containing protein 1-like isoform 1 [Meleagris gallopavo]	XP_003206068	486	1	889.026	2296	0	43	493	37	486	0	0	424	433	1	451	VTKKSLTHVVCHTCFKRQERLHRCGQCKFAYYCDRTCQRDAWLNHKNECSAIKKHGKAPTENIRLAARILWRIEREGSGLSENCLVSIDDLQNHVESFDEEEKKDLRIDVESFLEFWPAQSQQFGVQYISHIFGVINCNAFTLSDQRGLQAVGVGIFPNLCQANHDCWPNCTVIFNNGNKQRPVNALTTIATPIELRALSKISPGDELTVSYVDFLNVSEERQKQLKKQYYFDCTCEHCKKKIKDDLMLAGKEGD	VVFDSLTHVVCHTCFKRQEKLHRCGQCKFAYYCDRTCQRDAWLNHKNECSAIKKHGKAPTENIRLAARILWRIEREGSGLSENCLVSIDDLQNHVENFDEEEKKDLRIDVESFLEFWPAQSQQFGMQYISHIFGVINCNAFTLSDQRGLQAVGVGIFPNLCQANHDCWPNCTVIFNNGNHE-AVRSMFHTQMRIELRALSKISPGDELTVSYVDFLNVSEERQKQLKKQYYFDCTCEHCKKKIKDDLMLAVKEGD	V SLTHVVCHTCFKRQE+LHRCGQCKFAYYCDRTCQRDAWLNHKNECSAIKKHGKAPTENIRLAARILWRIEREGSGLSENCLVSIDDLQNHVE+FDEEEKKDLRIDVESFLEFWPAQSQQFG+QYISHIFGVINCNAFTLSDQRGLQAVGVGIFPNLCQANHDCWPNCTVIFNNGN + V ++ IELRALSKISPGDELTVSYVDFLNVSEERQKQLKKQYYFDCTCEHCKKKIKDDLMLA KEGD
391304	Query_49	14-contig_19840_1	395	gi|326919613|ref|XP_003206074.1|PREDICTED: mitochondrial inner membrane protein-like [Meleagris gallopavo]	XP_003206074	742	1	707.983	1826	0	11	395	42	453	0	0	369	378	27	412	SVGKIVGGSVLFVGGGVGGTVLYASYDPQFRENVEKAIPYSDRLFEMALGPAPHSVPMPKRPIQQGPLKISSVAEVMKESKQPAPKSQPSKTEAVAPSEEKE---------------------------DKEHEVSHAVKERSPDEVAARLAQQDKEEQEKISALAATLEGALSSTARITLQAITAQESAVQAVNAHLQILKEAMDDSETAGEKKSAQWRTLEDALKDRRRAVDEAADVLLKAKEELEKTKGVIE	SVGKIIGASVLFVGGGVGGTVLYASYDPRFRENVEKAIPYSDKLFEMALGPAPYSVPMPKKPIQQGPLKISSVAEVMKESKQPVPKSQTSQTEAVAPPEEKEAGTAAAQIISATGVAMSVPAPGIQTEEDKEHEDSHAIKERSPDEVAARLAQQDKEEQEKISALAATLEGALSSTARITLQAITAQESAVQAVNAHLQILKEAMDDSETAGEKKSAQWRTLEEALKDRRRAVDEAADVLLKAKEELEKTKGVIE	SVGKI+G SVLFVGGGVGGTVLYASYDP+FRENVEKAIPYSD+LFEMALGPAP+SVPMPK+PIQQGPLKISSVAEVMKESKQP PKSQ S+TEAVAP EEKE DKEHE SHA+KERSPDEVAARLAQQDKEEQEKISALAATLEGALSSTARITLQAITAQESAVQAVNAHLQILKEAMDDSETAGEKKSAQWRTLE+ALKDRRRAVDEAADVLLKAKEELEKTKGVIE
178073	Query_1001	19-contig_2273_1	2366	gi|326919868|ref|XP_003206199.1|PREDICTED: flap endonuclease 1-like [Meleagris gallopavo]	XP_003206199	381	1	676.781	1745	0	1436	1764	1	329	0	0	321	326	0	329	MGIHGLAKLIADVAPGAIRENDIKSYFGRKVAIDASMSIYQFLIAVRQGADVLQNEEGETTSHLMGMFYRTIRMVENGIKPVYVFDGKPPQLKAGELAKRTERRAEAEKHLQEAQEAGEETNVEKFSKRLVKVTQQHTDECKKLLTLMGIPYVEAPGEAEASCATLVKAGKVYAAATEDMDCLTFGSPVLMRHLTASEAKKLPIQEFHLNRILQDLGLTWEQFVDLCILLGCDYCESIRGIGPKRAVELIKQHKT	MGIHGLAKLIADVAPSAIRENDIKSYFGRKVAIDASMSIYQFLIAVRQGAEVLQNEEGETTSHLMGMFYRTIRMVENGIKPVYVFDGKPPQLKSGELARRTERRSEAEKHLQEAQEAGEETNIEKFSKRLVKVTQQHTDECKKLLMLMGIPYVEAPGEAEASCATLVKAGKVYAAATEDMDCLTFGSPVLMRHLTASETKKLPIQEFHLNRILQDLGLTWEQFVDLCILLGCDYCESIRGIGPKRAVELIKQHKT	MGIHGLAKLIADVAP AIRENDIKSYFGRKVAIDASMSIYQFLIAVRQGA+VLQNEEGETTSHLMGMFYRTIRMVENGIKPVYVFDGKPPQLK+GELA+RTERR+EAEKHLQEAQEAGEETN+EKFSKRLVKVTQQHTDECKKLL LMGIPYVEAPGEAEASCATLVKAGKVYAAATEDMDCLTFGSPVLMRHLTASE KKLPIQEFHLNRILQDLGLTWEQFVDLCILLGCDYCESIRGIGPKRAVELIKQHKT
347381	Query_24	11-contig_8628_1	1168	gi|326919880|ref|XP_003206205.1|PREDICTED: bromo adjacent homology domain-containing 1 protein-like [Meleagris gallopavo]	XP_003206205	904	1	1070.84	2768	0	19	573	57	611	0	0	521	531	0	555	GLDVDPMTHARKKQLFLLKHPAGSAGQISSPTGNRRMDRTQAERGEQRDGDATEAANSSSGFVGTSKSKSLQEVRKTYPLRRRLLPSVNKKTCKVLLTRLEDVAGSLSKETQSCKKKDLPSWVEGLGPTFFAEQVKPAGAGKSDSAGEKCTITYPGTEEDLDTAPSEPRKRRLASLNAEAVNNLLFERDDGLLSGRRFRRDPAKASGDCSAKSLHCKAGDSWPALEKTAVKTGKGKNRHESGQKYNSCDHSQDEV	GLDIDPMTHARKKQLFLLKRPAGSAGQVSSPTGNRRMDRTQAECSEQRDGDATEGASSLSGFVGTSKSKNLQEVRKTYPLRRRLLPSVNKKTCKVLLTRLEDVAGSLSKETQSCKKKDLPSWVEELGPTFFAEQVKPVGAGKSDSAGEKCTVTYPGTEEDLDAAPSEPRKRRLASLNAEAVNNLLFERDDGLLSGRRFRRDPAKASGDCTAKSLHCKAGDSWPALEKTTVKTGKGKNRHEPSQKYNSCDHSLDEV	GLD+DPMTHARKKQLFLLK PAGSAGQ+SSPTGNRRMDRTQAE EQRDGDATE A+S SGFVGTSKSK+LQEVRKTYPLRRRLLPSVNKKTCKVLLTRLEDVAGSLSKETQSCKKKDLPSWVE LGPTFFAEQVKP GAGKSDSAGEKCT+TYPGTEEDLD APSEPRKRRLASLNAEAVNNLLFERDDGLLSGRRFRRDPAKASGDC+AKSLHCKAGDSWPALEKT VKTGKGKNRHE QKYNSCDHS DEV
360597	Query_676	1-contig_59456_1	387	gi|326920054|ref|XP_003206291.1|PREDICTED: vitamin D 25-hydroxylase-like [Meleagris gallopavo]	XP_003206291	503	1	755.747	1950	0	5	386	64	445	0	0	366	369	0	382	RGSGLKAGRAHTARIFSLDLGGISAIVLNGYDAVKECLVHQSEIFADRPSLPLFKKLTNMGGLLNSKYGRGWTEHRKLAVNTFRTFGYGQRSFEHKISEESVFFLDAIDTYKGRPFDPKHLITNAVSNITNLIIFGERFTYEDTEFQHMIEIFSENIELAASASVFLYNAFPWIGILPFGKHQQLFKNAAEVYDFLQKLIERVSENRKPQSPRHYIDAYLDEMDCNKNDPESTYSRENLIFSVGELIIAGTETTT	RFSGLVLQNDDRKTIFSLDLGGISAIVLNGYDAVKECLVHQSEIFADRPSLPLFKKLTNMGGLLNSKYGRGWTEHRKLAVNTFRTFGYGQRSFEHKISEESVFFLDAIDTYKGRPFDLKHLITNAVSNITNLIIFGERFTYEDTEFQHMIEIFSENIELAASASVFLYNAFPWIGILPFGKHQQLFKNAAEVYDFLHKLIERVSENRKPQSPRHFIDAYLDEMDCNKSDPESTYSRENLIFSVGELIIAGTETTT	R SGL IFSLDLGGISAIVLNGYDAVKECLVHQSEIFADRPSLPLFKKLTNMGGLLNSKYGRGWTEHRKLAVNTFRTFGYGQRSFEHKISEESVFFLDAIDTYKGRPFD KHLITNAVSNITNLIIFGERFTYEDTEFQHMIEIFSENIELAASASVFLYNAFPWIGILPFGKHQQLFKNAAEVYDFL KLIERVSENRKPQSPRH+IDAYLDEMDCNK+DPESTYSRENLIFSVGELIIAGTETTT
25749	Query_438	1-contig_17377_1	1383	gi|326920209|ref|XP_003206367.1|PREDICTED: PHD and RING finger domain-containing protein 1-like [Meleagris gallopavo]	XP_003206367	1794	1	1994.55	5166	0	30	1347	305	1621	0	0	1205	1246	13	1324	CFSSDCTFVAACVHIKVLSYTVKERLFSECF-----GDRNTDHVSEEEVAALTADVIPTTSRLRPHVRTRAIARTRQSERVRATVNRNRITTAQRIQHVPRYLMSSLLDETIEAVVAGLNTAIYQRPLTLRAPARQKRKTGRRRKAAGKKRTQTKSSVGKKTSGTQVKRRKRLIKKRRGKKIRVKNEVTARSRIARTLGLSKPVRGASLPSMYKSTEPSLGLMRADIGAASLSVFGDPYELDPYEGNEEVPASPD	CDGCDAGYHMECLNPPLSEVPVDEWFCPACVPMDVSASADTDHVSEEEVAALMADVTPTTSRLRPHVRTRAIARTRQSERVRATVNRNRITTAQQIQHVPRYLMSSLLDETIEAVVAGLNTAIYQRPLTLRAPARQKRKTGRRRKAAGKKRTQTKSSAGKKTSGTQLKRRKRLMKKRRGKKIRVKNEVTARSRIARTLGLSKPVRGASIPSMYKPTEPSLGLMRADIGAASLSVFGDPYELDPYEGNEEVPANPD	C D + C++ + V E C +TDHVSEEEVAAL ADV PTTSRLRPHVRTRAIARTRQSERVRATVNRNRITTAQ+IQHVPRYLMSSLLDETIEAVVAGLNTAIYQRPLTLRAPARQKRKTGRRRKAAGKKRTQTKSS GKKTSGTQ+KRRKRL+KKRRGKKIRVKNEVTARSRIARTLGLSKPVRGAS+PSMYK TEPSLGLMRADIGAASLSVFGDPYELDPYEGNEEVPA+PD
291952	Query_887	12-contig_15498_1	629	gi|326920217|ref|XP_003206371.1|PREDICTED: histone-lysine N-methyltransferase SUV420H1-like isoform 2 [Meleagris gallopavo]	XP_003206371	880	1	863.218	2229	0	8	474	391	857	0	0	450	458	0	467	TANRKSSIGVKKNGKNRTLTRQSISRIPASSNSTSSKLTHINNSRVPKRLKKPAKPLLSKMKQRNQCKRPEQKNASKKLEMGNLVLKEPKVVLYKSLPIKKDKELEGPVKVAVSSGCLTRHAAREYKLNSVKGAHEHGDIPPCTYITRRSVRTRMSLKETSDIKLEPNTLDSYKNNLTRAQSDVLEPESHAADENNLAHGTSHKGEGRCQKNDAGTSKKKSRQGKLVKPPAKSDGTDNAHNTPVKDEVPDLISSH	TSNRKSSIGVKKNGKNRTLTRQSISRIPASSNSTSSKLTHINNSRVPKRLKKPAKPLLSKIKQRNQCKRPEQKNASKKLEMGNLVLKEPKVVLYKSLPIKKDKELEGPVKVAVSSGCLTRHAAREYKLNSVKGAHEHGDIPPCTYITRRSMRTRMSLKETSDIKLEPNTLDSYKNNLARTRSDVLEQQSHATDESNLAHGTSHKGEARCQKNDAGTSKKKSRQGKLVKPPAKLDETDNTHNTPVKDEVPDLISSH	T+NRKSSIGVKKNGKNRTLTRQSISRIPASSNSTSSKLTHINNSRVPKRLKKPAKPLLSK+KQRNQCKRPEQKNASKKLEMGNLVLKEPKVVLYKSLPIKKDKELEGPVKVAVSSGCLTRHAAREYKLNSVKGAHEHGDIPPCTYITRRS+RTRMSLKETSDIKLEPNTLDSYKNNL R +SDVLE +SHA DE+NLAHGTSHKGE RCQKNDAGTSKKKSRQGKLVKPPAK D TDN HNTPVKDEVPDLISSH
322387	Query_366	2-contig_3211_1	684	gi|326920404|ref|XP_003206464.1|PREDICTED: protein kinase C and casein kinase substrate in neurons protein 3-like [Meleagris gallopavo]	XP_003206464	437	1	903.279	2333	0	53	486	1	434	0	0	430	433	0	434	MSSEDDAGGEAPEGSFWEAGNYRRTVKRVDDGYRLCNDLISCFQERAKIEKNYAQQLTEWSRKWRTNVEKGPQYGTLEKAWHAFLTAADKLSEIHLVVRNHLAGEDSDKIKAWQKEAYHKQIIGGFKETKDAEDGFRKAQKPWVKKMKDVEASKKNYHAARKEEKTAHTRENHAKADSSVSQEQLRKLQERVEKCTQEAEKCKDQYEKMLEELNRYNPRYMEDMEQVFEGCQEAERKRLCFFKEMFLNLHQHLNL	MSSEDDAGGEAPEGSFWEAGNYRRTVKRVDDGYRLCNDLISCFQERAKIEKNYAQQLTEWSRKWRTNVEKGPQYGTLEKAWHAFLTAADKLSEIHLVVRNHLAGEDSDKIKAWQKEAYHKQIIGGFKETKEAEDGFRKAQKPWVKKMKDVETSKKSYHAARKEEKTAHTRENHAKADSSVSQEQLRKLQERVEKCTQEAEKCKDQYEKMLEELNRYNPRYMEDMEQVFEGCQEAERKRLCFFKEMFLNLHQHLNL	MSSEDDAGGEAPEGSFWEAGNYRRTVKRVDDGYRLCNDLISCFQERAKIEKNYAQQLTEWSRKWRTNVEKGPQYGTLEKAWHAFLTAADKLSEIHLVVRNHLAGEDSDKIKAWQKEAYHKQIIGGFKETK+AEDGFRKAQKPWVKKMKDVE SKK+YHAARKEEKTAHTRENHAKADSSVSQEQLRKLQERVEKCTQEAEKCKDQYEKMLEELNRYNPRYMEDMEQVFEGCQEAERKRLCFFKEMFLNLHQHLNL
10553	Query_675	1-contig_6926_1	1425	gi|326920491|ref|XP_003206505.1|PREDICTED: cytosolic phospholipase A2 epsilon-like [Meleagris gallopavo]	XP_003206505	656	1	815.453	2105	0	118	629	17	587	0	0	428	450	139	611	ISQADCYVSLFLPTASAETVRTRTIENCKDPVWNETFFFRIQSQVKNILELKVYDENTITKDDLLFTVLFDVAKIQLGETVRLTFQLNPEGSYEQNQTLSLDSPLQPLRPLIFHYLKYDLTELRMALAEKKPHFCLVCYLLLESRNLDVRLDFDLCTEEKNFLHKRRKLVASALKKALNLEQDLLDHE-----------------------------------------------------SPDWSHKDLSGPIR	VSQADCYVSLSLPTASSDTVRTRTIKNCRDPVWNEIFCFRIQSQVKNILELKVYDENTITKDDLLFTVLFDVAKIQLGETVRLTFQLNPE-----NETVNL------------HVKSMDW-----------------------SRNLDVRLEFDLCMEEKIFLQKRRKLVASALKKALNLEQDLQDHEVPVVAVMTTGGGTRALTSLLGNLLGLQKLGLLDAISYITGSSGSTWTLAHLYQSPDWSHKDISGPIH	+SQADCYVSL LPTAS++TVRTRTI+NC+DPVWNE F FRIQSQVKNILELKVYDENTITKDDLLFTVLFDVAKIQLGETVRLTFQLNPE N+T++L H D SRNLDVRL+FDLC EEK FL KRRKLVASALKKALNLEQDL DHE SPDWSHKD+SGPI
255917	Query_969	18-contig_3297_1	1290	gi|326920687|ref|XP_003206600.1|PREDICTED: zinc finger protein 770-like [Meleagris gallopavo]	XP_003206600	719	1	1214.91	3142	0	76	757	1	682	0	0	598	630	6	685	MLRIQHCVTANTIPKKKPYTCDICYKQFETPSKLARHYLIHTGQKPFECHVCCKTFRQLVHLERHQLTHNLPFKCIFCHSNFKNVITLLKHQQLHNENYQNCIKQEEKSVSSEQ--VTCGIFQCSMCWKSFTTEQRWMLHQCQKADHLHGTRRRKKTHICESCNKTFPSRSKLERHFLIHTGQKPFKCSSCGKSFRQSTHLKIHQLTHTEERPFQCCFCQKGFKIQSKLMKHKQLHARNKAVSNI-YKGKSKYLR	MLRIQHCVTANRIPKKKPYICDICYKQFETPSKLARHYLIHTGQKPFECHVCYKTFRQLVHLERHQLTHNLPFKCNFCHRNFKNVITLLKHQQLHNENYQNCIKQEEKSVSSEQDGVTFGIFRCSVCWKSFTTGEKWMLHQCQKADCLHGTRRRKKTHPCELCNKTFPSRSKLERHFLIHTGQKPFKCSSCGKSFRQSTHLKIHQLMHTEERPFQCCFCQKGFKIQSKLMKHKQLHARNKAVSNIVYKGKTKHLR	MLRIQHCVTAN IPKKKPY CDICYKQFETPSKLARHYLIHTGQKPFECHVC KTFRQLVHLERHQLTHNLPFKC FCH NFKNVITLLKHQQLHNENYQNCIKQEEKSVSSEQ VT GIF+CS+CWKSFTT ++WMLHQCQKAD LHGTRRRKKTH CE CNKTFPSRSKLERHFLIHTGQKPFKCSSCGKSFRQSTHLKIHQL HTEERPFQCCFCQKGFKIQSKLMKHKQLHARNKAVSNI YKGK+K+LR
228046	Query_523	11-contig_40426_1	2023	gi|326920719|ref|XP_003206616.1|PREDICTED: a-kinase anchor protein 6-like [Meleagris gallopavo]	XP_003206616	2286	1	1896.71	4912	0	355	1415	1146	2209	0	0	989	1018	3	1064	ESLNVIDPSLMDLNGPSEDALEWDETDISNKLISVNEDLSDPEQELKKDDLNQKSTSGECGSNKVNEDESISDRGSPVYCSSITSPPNPHIYQVYSLHNIELSEKKHMPFLKKASKLSSVTQSNILNKSLSKDSSFSSTKSLPDLIGGTTLAKSYNYMYQSGNISRHSESESGIVSECDTETTNNSEIFLLNDIESTQSNPEIGHTGTQMDDIIDVIKQKLKQEEDDHVSLSDDFQLAQSGGCGSEIDEDLDSIT	ESLNFIDPSLMDLNGPSEDALEWDETDISNKLISVNEDLSDPDQELKKDDLSQKPTSGECGSNDVNEDESISDRGSPLYCSSITSPPNPHIYQVYSLHNIELSEKKHMPFLKKTSKLSSVTQSNILNKSLSKDSSFSSTKSLPDLIGGTMLAKPYNYMYQSGNISRHSESESGIVSECDTETTNNSEIFLLNDIESTQSNPEIGHTGTQMDDIIDVIKQKTKQDEEDHASLSDDFQLAPSGGCGNEIDRDLNNIT	ESLN IDPSLMDLNGPSEDALEWDETDISNKLISVNEDLSDP+QELKKDDL+QK TSGECGSN VNEDESISDRGSP+YCSSITSPPNPHIYQVYSLHNIELSEKKHMPFLKK SKLSSVTQSNILNKSLSKDSSFSSTKSLPDLIGGT LAK YNYMYQSGNISRHSESESGIVSECDTETTNNSEIFLLNDIESTQSNPEIGHTGTQMDDIIDVIKQK KQ+E+DH SLSDDFQLA SGGCG+EID DL++IT
70455	Query_666	4-contig_15871_1	618	gi|326920932|ref|XP_003206720.1|PREDICTED: echinoderm microtubule-associated protein-like 5-like [Meleagris gallopavo]	XP_003206720	1880	1	730.709	1885	0	17	394	1246	1661	0	0	365	367	38	416	RPPVSRALPQPEKLQTNNVGKKKRPIEDLILELVFGYRGKDCRNNVHYLNDGADVIYHTASIGILYNVATG---------------------------------DSADMSATAPSIHVWDAMNKQTLSVLRCYHSKGVCSVSFSATGKLLLSVGLDPEHTITIWKWQEGAKVASRAGHNQRIFVAEFRPDSDTQFVSVGVKHVRFWTLAGRALLSKKGLLSSIEDARMQTMLSVAFGANNLTFTGTISGDVCVWK	RPPVSRALPQPEKLQTNNVGKKKRPIEDLILELVFGYRGKDCRNNVHYLNDGADVIYHTASIGILYNVATGSQSFYQEHNDDILCLTVNQHPKFTNIVATGQVGDSADMSATAPSIHVWDAMNKQTLSVLRCYHSKGVCSVSFSATGKLLLSVGLDPEHTITIWKWQEGAKIASRAGHNQRIFVAEFRPDSDTQFVSVGVKHVRFWTLAGRALLSKKGLLSSIEDARMQTMLSVAFGANNLTFTGTISGDVCVWK	RPPVSRALPQPEKLQTNNVGKKKRPIEDLILELVFGYRGKDCRNNVHYLNDGADVIYHTASIGILYNVATG DSADMSATAPSIHVWDAMNKQTLSVLRCYHSKGVCSVSFSATGKLLLSVGLDPEHTITIWKWQEGAK+ASRAGHNQRIFVAEFRPDSDTQFVSVGVKHVRFWTLAGRALLSKKGLLSSIEDARMQTMLSVAFGANNLTFTGTISGDVCVWK
99746	Query_886	22-contig_13428_1	876	gi|326920988|ref|XP_003206746.1|PREDICTED: protein unc-79 homolog [Meleagris gallopavo]	XP_003206746	1900	1	762.296	1967	0	97	502	729	1134	0	0	392	397	0	406	EIELAEYRETGALQDSILRCVREESIQKKKLRSLKQKSLDIGNADSLLFTLDEHRRKSCIDRCDLEKPPVPAAYVIHRQSDYGRSRQNSSTKAENIEIQENPPPAESFQETRRPVIPEVRLNCMETFEVKVDSPVKPAGPKEDLDLIDLSSDSTSGPEKHSVLSTSDSDSLVFEPLPPLRIVESDEEETTNQLNDEISGKTTVSSPSTPINVSALSLSTTPLVQFSIEDCSKDFSSKDTSNSTSAGIEDILSTSP	EIELAEYRETGALQDSILRCVREESIQKKKLRSLKQKSLDIGNADSLLFTLDEHRRKSCIDRCDLEKPPVPAAYTIHRQSDYGRSRQNSSTKAENIEIQENPPSAESFQETRRPVIPEVRLNCMETFEVKVDSPVKPTGPKEDLDLIDLSSDSTSGPEKHSVLSTSDSDSLVFEPLPPLRIVESDEEETINQLNDEVSGKTTVSSPSTPINISALSLSTTPLVQFSIEDCSKDFSSKDTSNSTSAGIEDILSTSP	EIELAEYRETGALQDSILRCVREESIQKKKLRSLKQKSLDIGNADSLLFTLDEHRRKSCIDRCDLEKPPVPAAY IHRQSDYGRSRQNSSTKAENIEIQENPP AESFQETRRPVIPEVRLNCMETFEVKVDSPVKP GPKEDLDLIDLSSDSTSGPEKHSVLSTSDSDSLVFEPLPPLRIVESDEEET NQLNDE+SGKTTVSSPSTPIN+SALSLSTTPLVQFSIEDCSKDFSSKDTSNSTSAGIEDILSTSP
156544	Query_1058	3-contig_15526_1	670	gi|326921086|ref|XP_003206795.1|PREDICTED: 60 kDa lysophospholipase-like [Meleagris gallopavo]	XP_003206795	674	1	738.799	1906	0	1	450	51	510	0	0	380	387	88	499	MLHDDVYAQETKLCNLHEFPDDTLVLPVSKQNKRIFYTILELSPLLDSSNMTPEDWAKIAKKLEEHYEKYDGFVILHGTDTMAYTASALSFMCENLGKTVVLTGSQVPIYELQNDGRANLLGALLFAGQFVIPEVCLPVKTILEAALLPLARTHTYVCLYFYNKLYRGNRVTKVDAGSFNAFSSPNLPPLANAEVDITNHVLFGTVYSHEHRYRPVNWETVWRANTKKKFRVHTNMNRNVGLLRMFPGITAAA--	MLHDDAYAQETKLCNLHEFPDDTLVLPVSKQNKRIFYTILELSPLLDSSNMTPEDWAKIAKKLEEHYEKYDGFVILHGTDTMAYTASALSFMCENLGKTVVLTGSQVPIYELQNDGRANLLGALLFAGQFVIPE----------------------VCLYFYNKLYRGNRVTKVDAGSFNAFSSPNLPPLANAEVDIT-----------------INWETVWRANTKKKFRVHTNMNRNVGLLRIFPGITAAAVK	MLHDD YAQETKLCNLHEFPDDTLVLPVSKQNKRIFYTILELSPLLDSSNMTPEDWAKIAKKLEEHYEKYDGFVILHGTDTMAYTASALSFMCENLGKTVVLTGSQVPIYELQNDGRANLLGALLFAGQFVIPE VCLYFYNKLYRGNRVTKVDAGSFNAFSSPNLPPLANAEVDIT +NWETVWRANTKKKFRVHTNMNRNVGLLR+FPGITAAA
348220	Query_1085	1-contig_19727_1	772	gi|326921094|ref|XP_003206799.1|PREDICTED: kinesin light chain 1-like [Meleagris gallopavo]	XP_003206799	637	1	1144.03	2958	0	82	749	1	621	0	0	600	605	63	676	MYENMSTMVYLKEEKLEKLTQDEIIAKTKQVINGLEALKNEHNSILQSLLETLKCLKKDDETNLVEEKSNMIRKSLEMLELGLSEAQVMMALSNHLNAVESEKQKLRAQVRRLCQENQWLRDELANTQQKLQKSEQSVAQLEEEKKHLEFMNQLKKYDDDISPSEDKDTDSTKEPLDDLFPNDEDDQGQGIQQQHSSAAAAAQQGGYEIPARLRTLHNLVIQYASQGRYEVAVPLCKQALEDLEKTSGHDHPDVA	MYENMSTMVYLKEEKLEKLTQDEIIAKTKQVINGLEALKNEHNSILQSLLETLKCLKKDDETNLVEEKSNMIRKSLEMLELGLSEAQVMMALSNHLNAVESEKQKLRAQVRRLCQENQWLRDELANTQQKLQKSEQSVAQLEEEKKHLEFMNQLKKYDDDISPSEDKDTDSTKEPLDDLFPNDDEDQGQGIQQQHSSAAAAAQQGGYEIPARLRTLHNLVIQYASQGRYEVAVPLCKQALEDLEKTSGHDHPDVA	MYENMSTMVYLKEEKLEKLTQDEIIAKTKQVINGLEALKNEHNSILQSLLETLKCLKKDDETNLVEEKSNMIRKSLEMLELGLSEAQVMMALSNHLNAVESEKQKLRAQVRRLCQENQWLRDELANTQQKLQKSEQSVAQLEEEKKHLEFMNQLKKYDDDISPSEDKDTDSTKEPLDDLFPND++DQGQGIQQQHSSAAAAAQQGGYEIPARLRTLHNLVIQYASQGRYEVAVPLCKQALEDLEKTSGHDHPDVA
135749	Query_476	2-contig_14643_1	786	gi|326921114|ref|XP_003206809.1|PREDICTED: zinc finger protein 238.2-like [Meleagris gallopavo]	XP_003206809	519	1	747.658	1929	0	241	651	53	467	0	0	379	388	4	415	YEGRMEFPDHSRQLLQCLSQQRHQGFLCDCTVLVGEAQFRAHRAVLASCSMYFHLFYRDQLDKRDIVHLNSDIVTAPAFSLLLEFMYEGKLEFHSLPVEDVLAAASYLHMYDIVKVCKGKLKDKELGSEEKPGDEAAALDKAERFLDEFEPGSKAKSEYERAVGKEKVGSHPAWPCGTPSLSPAEAEPCTAAAGKTKANVNSCSGPLSQRSASRPPVLSEADCALDLSFKPVLGRDSLQPSYAFGQLASDSQQQG	YEGRMEFPDHSRQLLQCLSQQRHQGFLCDCTVLVGEAQFRAHRAVLASCSMYFHLFYRDQLDKRDIVHLNSDIVTAPAFSLLLEFMYEGKLEFHSLPVEDVLAAASYLHMYDIVKVCKGKLKDKESGSEEKPGDEAAVLDKAERFLDEFEPGGKARLEYERAVGKEKVGSHPAWPCGPPNLSPAEAEPCAAAAGKTKANVNSCAGPLSQRSASRPPVSSEADCALDLSFKPMLGRDSLQPSYAFGQLASDSQQQG	YEGRMEFPDHSRQLLQCLSQQRHQGFLCDCTVLVGEAQFRAHRAVLASCSMYFHLFYRDQLDKRDIVHLNSDIVTAPAFSLLLEFMYEGKLEFHSLPVEDVLAAASYLHMYDIVKVCKGKLKDKE GSEEKPGDEAA LDKAERFLDEFEPG KA+ EYERAVGKEKVGSHPAWPCG P+LSPAEAEPC AAAGKTKANVNSC+GPLSQRSASRPPV SEADCALDLSFKP+LGRDSLQPSYAFGQLASDSQQQG
96120	Query_151	3-contig_7245_1	2181	gi|326921126|ref|XP_003206815.1|PREDICTED: zinc finger and BTB domain-containing protein 1-like isoform 1 [Meleagris gallopavo]	XP_003206815	711	1	1313.9	3399	0	1281	1931	1	651	0	0	635	642	0	651	MARTSHSNYVLQQLNNQREWGFLCDCCIAIDDIYFQAHKAVLAACSSYFRMFFMNHQHTTAQLNLSNMKISAECFDLILQFMYLGKIMTAPANFEQFKVAMNYLQLYNVPECLEDIQDTDSSSLKCSSSASSTQNSKMIFGVRMYEDTLARNGSETNRWGMEPPSSTVNTSHNKEPDEEALQLASFPEQLFDVCKKSTTSKYSHTKERVSHSRRFGRSFTCDSCGFSFSCEKLLDEHVLSCTNRHSYQSARYYGA	MARTSHSNYVLQQLNNQREWGFLCDCCIAIDDIYFQAHKAVLAACSSYFRMFFMNHQHTTAQLNLSNMKISAECFDLILQFMYLGKIMTAPANFEQFKVAMNYLQLYNVPECLEDIQDTDSSSLKCSSSASSTQNSKMIFGVRMYEDTLARNGSETNRWGMEPPSSTVNTSHNKEPDEEALQLSSFPEQLFDVCKKSTTSKYSHTKERVSHSRRFGRSFTCDSCGFSFSCEKLLDEHVLSCTNRHSYQSARYYGA	MARTSHSNYVLQQLNNQREWGFLCDCCIAIDDIYFQAHKAVLAACSSYFRMFFMNHQHTTAQLNLSNMKISAECFDLILQFMYLGKIMTAPANFEQFKVAMNYLQLYNVPECLEDIQDTDSSSLKCSSSASSTQNSKMIFGVRMYEDTLARNGSETNRWGMEPPSSTVNTSHNKEPDEEALQL+SFPEQLFDVCKKSTTSKYSHTKERVSHSRRFGRSFTCDSCGFSFSCEKLLDEHVLSCTNRHSYQSARYYGA
373481	Query_61	16-contig_6935_1	1172	gi|326921144|ref|XP_003206824.1|PREDICTED: WD repeat-containing protein 89-like [Meleagris gallopavo]	XP_003206824	389	1	733.021	1891	0	565	950	3	388	0	0	350	367	0	386	AMEKMEEQFASLRIAKRSVLSKEPAYLLDIDVSGSAQSESSRFVAVSCSNKSIRVYNRETLTFLREYSSCPGTLNGVRFARACDSLVFSACSDGTVKCWDIRSAAQKAAQVFSGYPSNKFISFDINCSDLIICAGTEKVEPDTFLVFWDARGSTDCAGTTREPLGVYSESHSDDVTKVCFHPVKPSLVISGSTDGLVNVFDINKDNEDDALISTCNSVSSVSFIGWSGKDYDQVYCVTHDEGFCWWDLAQLDTEE	AIEKIEEQFASLRIAKRSVLSEEPAYLLDIDISGSAQSESSRFVAVSCSNKSIRVFNRETLNFLREYSSCPGTLSGVRFAHVCDSLVFSACSDGTVKCWDIRLATQKAAQVFSGYPSNVFISFDINCSDFMICAGTEKVETDTFLVFWDARGSTDCASTVREPLGVYSESHNDDVTKICFHPVKPSLFVSGSTDGLVNVFDINKDNEDDALISTCNSDSSVSFIGWSGKDYEQIYCTTHDEGFCWWDLAQLDTEE	A+EK+EEQFASLRIAKRSVLS+EPAYLLDID+SGSAQSESSRFVAVSCSNKSIRV+NRETL FLREYSSCPGTL+GVRFA CDSLVFSACSDGTVKCWDIR A QKAAQVFSGYPSN FISFDINCSD +ICAGTEKVE DTFLVFWDARGSTDCA T REPLGVYSESH+DDVTK+CFHPVKPSL +SGSTDGLVNVFDINKDNEDDALISTCNS SSVSFIGWSGKDY+Q+YC THDEGFCWWDLAQLDTEE
237959	Query_84	2-contig_3367_1	597	gi|326921280|ref|XP_003206889.1|PREDICTED: serologically defined colon cancer antigen 1 homolog [Meleagris gallopavo]	XP_003206889	1080	1	781.556	2017	0	99	592	180	825	0	0	461	475	154	647	RLTEIISNAPKGEQLKRVLNPHLPYGATLIEHCLIEAGFSGSVKTDQHMESKENIEKVLCALEKAEEYMTLTDNFSGKGYIIQKKEKKPSLEPDKPAEDIYTLVQLGG---------PSNQF--LLQAADEFYSKLEGQKIDLKALQQE--------------------------VDKIKGELIEMNLEIVNRAIQVVRSALANQIDWTEIGAIVKEAQAQGDPVANAIKELKLQTNHITMLLRNPYVLSEEEEE	RLTEIISDAPKGEQLKRVLNPHLPYGATLIEHCLIEAGFSGYVKIDQHMESKENIEKVLSALEKAEEYMTLTEDFNGKGYIIQKKEKKPSLEPDKPAEDIYTYEEFHPFLFSQHSKCPYLEFDSFNKAADEFYSKLEGQKIDLKALQQEKQALKKLENVRRDHEQRLEALQQAQEVDKIKGELIEMNLEIVNRAIQVVRSALANQIDWTEIGAIVKEAQAQGDPVANAIKELKLQTNHITMLLRNPYVLSEEEEE	RLTEIIS+APKGEQLKRVLNPHLPYGATLIEHCLIEAGFSG VK DQHMESKENIEKVL ALEKAEEYMTLT++F+GKGYIIQKKEKKPSLEPDKPAEDIYT + P +F +AADEFYSKLEGQKIDLKALQQE VDKIKGELIEMNLEIVNRAIQVVRSALANQIDWTEIGAIVKEAQAQGDPVANAIKELKLQTNHITMLLRNPYVLSEEEEE
320312	Query_131	8-contig_11652_1	1574	gi|326921296|ref|XP_003206897.1|PREDICTED: ninein-like [Meleagris gallopavo]	XP_003206897	2022	1	1053.89	2724	0	2	678	735	1407	0	0	544	593	4	677	LTTFRKKMASEYNTRAAHAETQFSADTQTLVNKYEETIRALEGRYQRELRELVEQQREEKSQWEFEKDEVAQEVAEAHERLKESLANERAASVALSREKELLEKSFKEEVNTLLCEKEQLQRELQELRDAAEEQEKKLSREILQLQNDHEKELKDKDERISVVEENGKLVSQKLERLSSEYKREKEELNSKLLALESLNKDICVRAEAEKAEMNLEISNLQEKVKKLQWENRSFSTLQNHCRVLENEYAKAKNKI	LEEERQKMESDYNRRASHAESQFSADTQTLVNKYEETIQSLEGRYQRELREFVELQREEKAQWEFERDEIAQEVAEAHEQLKERLANEKAASVALSQEKELLEKKFKEEVNALVCEKEQLQKELQELRDAAEEQERKLSSEMLQLQNDHEKELKDKQELISTVEESGKLVSQKLERLNSEYKREKEELNSKLLALESLNKDICVKAEAEKAEMNLEISNLQEKVQKLQWENLSFSALQNHYRVLENEYTKAKSKI	L R+KM S+YN RA+HAE+QFSADTQTLVNKYEETI++LEGRYQRELRE VE QREEK+QWEFE+DE+AQEVAEAHE+LKE LANE+AASVALS+EKELLEK FKEEVN L+CEKEQLQ+ELQELRDAAEEQE+KLS E+LQLQNDHEKELKDK E IS VEE+GKLVSQKLERL+SEYKREKEELNSKLLALESLNKDICV+AEAEKAEMNLEISNLQEKV+KLQWEN SFS LQNH RVLENEY KAK+KI
288727	Query_229	2-contig_6784_1	1121	gi|326921312|ref|XP_003206905.1|PREDICTED: nidogen-2-like [Meleagris gallopavo]	XP_003206905	1040	1	1321.61	3419	0	55	1072	19	1039	0	0	745	790	139	1089	GRAARRLFVGTNGVISTQDFPGETQYVDDEFPTDFPVIAPFLADLDTSGGRGDIYYRQDHDPAVLERAAGYVHAGFPRT---FTPSGVFIATWEDVGAHGEPPIKLNTFQAILAYNEEDTYTIFLYPEGGLQFLGTRPKESYNVQLELPARVGFSRGDGDDGKREGHSYSMASSQQELQRLERESNVGLPGVWVFHVGTLENVEPGDGPGAVLSPAPHGIDDTDDNPVPTELLAQPGSGMTSPRPRSALLSIVPS	GPARPQLAVGTNGVISSQDFPGETQYVDDDFPTDFPVIAPFLADLDTSGGRGDIYYRQDHTPSVLEQAAGYVHAGFPYTTGTFVPSSVFVATWEDVGAHGEPPGKLNTFQAILAYNEEDTYAIFLYPEGGLQFLGTRPKESYNVQLELPARVGFSRGDGDDGKREGHSYNVASSQQELQRLERESNVGMPGVWVFHVSTLENVEPRNDPGAALSSAPHGTDDTS---VPTELLAQPGSRTTSPHPHPALLSIVPS	G A +L VGTNGVIS+QDFPGETQYVDD+FPTDFPVIAPFLADLDTSGGRGDIYYRQDH P+VLE+AAGYVHAGFP T F PS VF+ATWEDVGAHGEPP KLNTFQAILAYNEEDTY IFLYPEGGLQFLGTRPKESYNVQLELPARVGFSRGDGDDGKREGHSY++ASSQQELQRLERESNVG+PGVWVFHV TLENVEP + PGA LS APHG DDT VPTELLAQPGS TSP P ALLSIVPS
227923	Query_558	22-contig_27019_1	1158	gi|326921383|ref|XP_003206939.1|PREDICTED: LOW QUALITY PROTEIN: NK-tumor recognition protein-like [Meleagris gallopavo]	XP_003206939	1456	1	1120.15	2896	0	134	1022	378	1253	0	0	793	828	13	889	LSDPCTSRWDERSASRRSRSWSHNGYSDLSTVRYSSHHKKHRKKKVKHKKKSKKQKHLKKHKQTKKKKASASSEVESSHSIRKKKSSCDRERKSRSSSLSSRHSSRRDWSKSDKEDQSSSSFSSKESRSYYRSRSRSRSRSKSRSYSQRSSRSRSASKSSRSRSRSRSSSNPRHQKTVSNSPRNISTRLNENKLNKPIDPVQAVILPSDKVIIPPVVPESLPVIPLSDSPPPSRWKPGQKPWKPSYERIQEMKAK	LSDPCTSRWDERSASRRSRSWSHNGYSDLSTVRYSSHYKKHRKKKVKHKKKSKKQKHFKKHKQTKKKKASASSEVESSRSFRKKKSSCDRERKSRSSSLSSRHSSRRDWSKSDKEDQSSSTFSSRESRS--YYRSRSRSRSKSRSYSQRSSRSRSASKSSRSRSRSRSSSNPRHQKTVSNSPRNISARLNESKLNKPSDPVRAVILPSDKVIIPPVVPETLPVIPLSDSPPPSRWKPGQKPWKPSYERIQEMKAK	LSDPCTSRWDERSASRRSRSWSHNGYSDLSTVRYSSH+KKHRKKKVKHKKKSKKQKH KKHKQTKKKKASASSEVESS S RKKKSSCDRERKSRSSSLSSRHSSRRDWSKSDKEDQSSS+FSS+ESRS RSRSRSRSKSRSYSQRSSRSRSASKSSRSRSRSRSSSNPRHQKTVSNSPRNIS RLNE+KLNKP DPV+AVILPSDKVIIPPVVPE+LPVIPLSDSPPPSRWKPGQKPWKPSYERIQEMKAK
388425	Query_227	1-contig_32722_1	419	gi|326921530|ref|XP_003207010.1|PREDICTED: nucleolar MIF4G domain-containing protein 1-like [Meleagris gallopavo]	XP_003207010	851	1	759.599	1960	0	31	418	208	639	0	0	375	384	44	432	RLSEPNLSSISGQLEELYMANSRKDMNETLTHILMNACVTAVAMPARLMMEHVLLVSILHHTVGTEVGAHFLEAVVKKFDELSRSDAEGKECENLLALIAHLYNFHVVHCLLIFDILKKLVSSFTEKDIELILFLLKNVGFSLRKDDALALKDLISEAQSKANTAEKELKDQTRVRFMLETMLALRNNDMRKIPGYDPEPVEKLRKLQRTLVHSSSCGKETQLRVSLESLLNADRVGRWWIVGSSWSGAPMISNT	RLSEPNLSSICGQLEELYMANSRKDMNETLTSILMNACVTAVAMPARLMMEHVLLVSVLHHTVGTEVGAHFLEAVVKKFDELNRSDAEGKECENLLALIAHLYNFHVVHCLLIFDILKKLVSSFTEKDIELILFLLKNVGFSLRKDDALALKDLISEAQSKANAAEKELKDQTRVRFMLETMLALRNNDMRKIPGYDPQPVEKLRKLQRTLIHSSSTGKETQLRVSLESLLNADRVGRWWIIGSSWSGAPMINNT	RLSEPNLSSI GQLEELYMANSRKDMNETLT ILMNACVTAVAMPARLMMEHVLLVS+LHHTVGTEVGAHFLEAVVKKFDEL+RSDAEGKECENLLALIAHLYNFHVVHCLLIFDILKKLVSSFTEKDIELILFLLKNVGFSLRKDDALALKDLISEAQSKAN AEKELKDQTRVRFMLETMLALRNNDMRKIPGYDP+PVEKLRKLQRTL+HSSS GKETQLRVSLESLLNADRVGRWWI+GSSWSGAPMI+NT
198921	Query_453	3-contig_2626_1	436	gi|326921606|ref|XP_003207048.1|PREDICTED: poly(A) RNA polymerase, mitochondrial-like [Meleagris gallopavo]	XP_003207048	544	1	661.374	1705	0	6	339	76	409	0	0	318	325	0	334	NREPSAACEFSDKSSVASLQAVTGIPRAAEHHVVPYKSRLFTFTLKNPGSQAADERPVNLSPQSHIPVNELIPKLCRADSISSQMYILLNEYQLTEENIKLRYLACSLVRDFARAYFPDSTVKPFGSSVNTFGKLGCDVDMFLDFRDIPKHTTKMKKGPFEMEYQMKRLPSERLATQKILSVIGDCLDNFGPGYSSVQKILNARCPLVKFSHQPTGFQCDLSVSNSIAIKCSELLYIYGCLDPRVRALVFSLRCW	NRGINALIEFSEKSSVASLQAVTGIPRAAEHHVVPYKSRLFTFTLKNPGSQAAEERPVNLSPQSHIPVNELIPKLCHADSISSQMYILLNEYQLTEENIKLRYLACSLVRDFARAYFPDSSVKPFGSSVNTFGKLGCDVDMFLDFRDIQKHPTKMKKGPFEMEYQMKRLPSERLATQKILSIIGDCLDNFGPGYSSVQKILNARCPLVKFSHQPTGFQCDLSVSNSIAIKCSELLYIYGCLDPRVRALVFSLRCW	NR +A EFS+KSSVASLQAVTGIPRAAEHHVVPYKSRLFTFTLKNPGSQAA+ERPVNLSPQSHIPVNELIPKLC ADSISSQMYILLNEYQLTEENIKLRYLACSLVRDFARAYFPDS+VKPFGSSVNTFGKLGCDVDMFLDFRDI KH TKMKKGPFEMEYQMKRLPSERLATQKILS+IGDCLDNFGPGYSSVQKILNARCPLVKFSHQPTGFQCDLSVSNSIAIKCSELLYIYGCLDPRVRALVFSLRCW
262789	Query_304	3-contig_7981_1	628	gi|326921724|ref|XP_003207106.1|PREDICTED: metalloreductase STEAP4-like, partial [Meleagris gallopavo]	XP_003207106	472	1	704.901	1818	0	226	608	1	383	0	0	356	367	0	383	MNKNSSNIMALVPKTSNKRETVCIFGTGDFGRALSHKLIQSGYPVVFGSRSPRPSSLIPNDAEVLSHAEAAQKAAIIIIAIQRQHYDFLASLEETLRGKVLVDISNNLKINQYPESNAKYLAQLVPNARVVKAFNTVSAWALQSGTLDASRQVFVCGDDTEAKQMVMDIVRALGLTPLDQGSLSAAQEIENYPLQLFPMWKLPIFLSLGLTAFFFFYCLVHDLIYPSVHENKDYSFFLAMTIPNRICPMMALVLL	MNKNSSNIMALVPKTSNKRETVCIFGTGDFGRALGHKLIQSGYPVVFGSRNPWPSSLIPKDAEVLSHAEAAQKAAIIIIAIQRQHYDFLASLEETLHGKVLVDISNNLKINQYPESNAKYLAQLVPSARVVKAFNTVSAWALQSGTLDASRQVFVCGDDTEAKQTVMDIVRALGLTPLDQGSLLAAREIENYPLQLFPMWKLPIFLSLGLTAFFFFYCLVRDVIYPCVYENKDYSFFLAISIPNRICPIMALILL	MNKNSSNIMALVPKTSNKRETVCIFGTGDFGRAL HKLIQSGYPVVFGSR+P PSSLIP DAEVLSHAEAAQKAAIIIIAIQRQHYDFLASLEETL GKVLVDISNNLKINQYPESNAKYLAQLVP+ARVVKAFNTVSAWALQSGTLDASRQVFVCGDDTEAKQ VMDIVRALGLTPLDQGSL AA+EIENYPLQLFPMWKLPIFLSLGLTAFFFFYCLV D+IYP V+ENKDYSFFLA++IPNRICP+MAL+LL
219698	Query_1059	2-contig_27317_1	819	gi|326921799|ref|XP_003207142.1|PREDICTED: WD repeat-containing protein mio-like [Meleagris gallopavo]	XP_003207142	877	1	899.427	2323	0	352	789	1	438	0	0	431	435	0	438	MSGSKPDILWAPHHVDRFVVCDSELSLYHIESAVSSELKAGSLRLSEETTATLLSINSDTPYMKCVAWYPKYDPECLLAVGQANGRVVLTSLGQDHNSKSKDLIGKEFVPKHARQCNTLAWNPLDSNWLAAGLDKHRADFSVLIWDISSKYAPETAVAAEKVRLSSGDPEAGLVVTKPLYELGQNDACLSLCWLPRDQKLLLAGMHRNLAIFDLRNTSQKIFVNTKAVQGVTVDPYFHDRVASFYEGQVAIWDLR	MSGSKPDILWAPHHVDRFVVCDSELSLYHIESAVSSELKAGSLRLSEETTATLLSINSDTPYMKCVAWYPKYDPECLLAVGQANGRVVLTSLGQDHNSKSKDLIGKEFVPKHARQCNTLAWNPLDSNWLAAGLDKHRADFSVLIWDISSKYAPETAVATEKVRLSTGDPEAGLVVTKPLYELGQNDACLSLCWLPRDQKLLLAGMHRNLAIFDLRNTSQKIFVNTKAVQGVTVDPYFHDRVASFYEGQVAIWDLR	MSGSKPDILWAPHHVDRFVVCDSELSLYHIESAVSSELKAGSLRLSEETTATLLSINSDTPYMKCVAWYPKYDPECLLAVGQANGRVVLTSLGQDHNSKSKDLIGKEFVPKHARQCNTLAWNPLDSNWLAAGLDKHRADFSVLIWDISSKYAPETAVA EKVRLS+GDPEAGLVVTKPLYELGQNDACLSLCWLPRDQKLLLAGMHRNLAIFDLRNTSQKIFVNTKAVQGVTVDPYFHDRVASFYEGQVAIWDLR
61031	Query_182	2-contig_92393_1	682	gi|326922151|ref|XP_003207315.1|PREDICTED: transmembrane protein with metallophosphoesterase domain-like [Meleagris gallopavo]	XP_003207315	439	1	753.821	1945	0	193	592	1	400	0	0	388	397	0	400	MISFKQLPLEAKAAVAAGVVFFSMMLSRSYLAQQLELRTRHWLLRLQMALFANTLMLIGSLHVWKSTVTMFSRSSAANSFFFMPWKIAVFMFLALAHSSFFTLLFLVAEEPYFFSLAAYTCLGAYIILIFFLFTLGSVEQAYKFFAGRGTKANSSGKSSRTAMKPVVAVLLTAVLTVIGLLNASQPPTVNRVEIPVHKLPSTMNNLKVVLLSDIHLGPTVGKTKLAMIVRMVKALKPDITVIVGDLTDSEAEIIR	MISFKQLPLEAKAAVAAGVVFFSMMLSRSYLAEQLELRTRRWLLRLQMALFANTLMLIGSLHVWKSTVTMFSRSSAANSFFFMPWKIAVFMFLALAHSSFFTLLFLVAEEPYFFSLAAYTCLGAYIILIFFLFALGSVEQAYKFFAGRGIKANSSGKSNRTAMKPVLAVMLTAVLTVIGLLNASQPPTVNRVEIPVHKLPSTMDNLKVVLLSDIHLGPTVGKTKLAMIVQMVKALKPDITVIVGDLTDSEAEIIR	MISFKQLPLEAKAAVAAGVVFFSMMLSRSYLA+QLELRTR WLLRLQMALFANTLMLIGSLHVWKSTVTMFSRSSAANSFFFMPWKIAVFMFLALAHSSFFTLLFLVAEEPYFFSLAAYTCLGAYIILIFFLF LGSVEQAYKFFAGRG KANSSGKS+RTAMKPV+AV+LTAVLTVIGLLNASQPPTVNRVEIPVHKLPSTM+NLKVVLLSDIHLGPTVGKTKLAMIV+MVKALKPDITVIVGDLTDSEAEIIR
15794	Query_270	24-contig_4057_1	1830	gi|326922179|ref|XP_003207329.1|PREDICTED: TPR and ankyrin repeat-containing protein 1-like [Meleagris gallopavo]	XP_003207329	2920	1	1934.07	5009	0	712	1736	1827	2851	0	0	932	980	0	1025	RYEEMLNARGQMVSKLSCTANQLYLEAAAKYLSVNRIEEMMQVLSKLDIEDQLEFLKSRGCLHQTADLLKREGRQEEAAKLMKQHGFALEAANLTAVKEFRASCLLAAVRAGTTHCSELDPMDREVMLREALELCEQTNHNSGIAEALFLQGALKGDFAKLSDAYSQFLSLNHSAGAVEVLFLLSHCSAPSPDIVCKATRGLMALLGLVKSLKKATTNIEKDMVKSCFAYFGIVPTGDSRCQVSQNEAEPILKFL	RYEEMLSARGQMVSKLSCTANQLYLEAAAKYLSVNRIEEMMQVLSKLDIEDQLEFLKSRGCLHQTADLLKREGRQEEAAKLMKQHGFALEAANLTAVKEFRASCLLAAARAGTTYCSESDLVDTEVMLREALELCEQTNQKSGIAEALFLQGALKGDFEKLSNAYFQFLSVNHSAGAVEVLFVLSHCNAPSQDILCKATHGLMALLDLVKSLKKATTNVEKDMVKSCFAYFGIVPTGDSCCQVSQNEAEPILKFL	RYEEML+ARGQMVSKLSCTANQLYLEAAAKYLSVNRIEEMMQVLSKLDIEDQLEFLKSRGCLHQTADLLKREGRQEEAAKLMKQHGFALEAANLTAVKEFRASCLLAA RAGTT+CSE D +D EVMLREALELCEQTN SGIAEALFLQGALKGDF KLS+AY QFLS+NHSAGAVEVLF+LSHC+APS DI+CKAT GLMALL LVKSLKKATTN+EKDMVKSCFAYFGIVPTGDS CQVSQNEAEPILKFL
224425	Query_104	47-contig_4057_1	1049	gi|326922187|ref|XP_003207333.1|PREDICTED: serine/threonine-protein kinase DCLK3-like [Meleagris gallopavo]	XP_003207333	784	1	1152.5	2980	0	283	880	1	599	0	0	557	580	1	599	MLDHVSQSASSKVTERKLRGTCPP-GRGNCGKQCVNARSCRSSCFNPRNGFHTIHSEHSPVKPRIITVVRPGGHTLRKITLLLNRRSVQNFEQLMADISEALGFPRWKNDRVRKLYSLRGREIQSVSDFFREGDAFIALGREPLTLNNLEVAIQELCPENPYAATAIQQNEEQSQKLKSRLCDKASKVDGGFDEAEIAKNCSDVVSPKMVAGKSQSKTRQEEKMRTKKKWTRGSWNGEQGVRPSRKAREDERYLN	MFEHMSQSASSKVTERKLRGTCPPVGRGNCGKQCVNASSCRSSCFNPRNDFHTLHSEHSPVKPRIITVVRPCGHMLRKITLLLNRRSVQTFEQLMADISEALGFPRWKNDRVRKLYSLRGREIQSVSDFFREGDAFIALGREPLTLKNLEVAIQELCPENPYAASAIQQNEEQSQKLKSRLCDKASKVDGGFDEVEVAKNCSDAVSPKMVAGKSQSKTRQEEKMRTKKKWTRGSWNGEQGVRPSRKAREDERYLN	M +H+SQSASSKVTERKLRGTCPP GRGNCGKQCVNA SCRSSCFNPRN FHT+HSEHSPVKPRIITVVRP GH LRKITLLLNRRSVQ FEQLMADISEALGFPRWKNDRVRKLYSLRGREIQSVSDFFREGDAFIALGREPLTL NLEVAIQELCPENPYAA+AIQQNEEQSQKLKSRLCDKASKVDGGFDE E+AKNCSD VSPKMVAGKSQSKTRQEEKMRTKKKWTRGSWNGEQGVRPSRKAREDERYLN
311564	Query_561	10-contig_11580_1	887	gi|326922220|ref|XP_003207349.1|PREDICTED: kelch repeat and BTB domain-containing protein 2-like [Meleagris gallopavo]	XP_003207349	623	1	1077.39	2785	0	38	549	111	622	0	0	511	512	0	512	LQVDDVLQRCREYLIKKINAENCVRLLSFADLFSCEELKQSAKRMVEHKFTAVYHQEAFMQLSHDLLIDILSSDNLNVEKEETVREAAMLWLEYNTESRSQYLSSVLSQIRIDALSEVTQRAWFQGLPPNDKSVVVQGLYKSMPKFFKPRLGMTKEEMMIFIEAAAENPGSLYSSVCYSPQAEKVYKLCSPPADLHKVGTLVTPDNDIYIAGGQVPLKNAKTNHSKSSKLQAAFRTVNCFYWFDAQQNTWFPKTP	LQVDDVLQRCREYLIKKINAENCVRLLSFADLFSCEELKQSAKRMVEHKFTAVYHQEAFMQLSHDLLIDILSSDNLNVEKEETVREAAMLWLEYNTESRSQYLSSVLSQIRIDALSEVTQRAWFQGLPPNDKSVVVQGLYKSMPKFFKPRLGMTKEEMMIFIEAAAENPGSLYSSVCYSPQAEKVYKLCNPPADLHKVGTLVTPDNDIYIAGGQVPLKNAKTNHSKSSKLQAAFRTVNCFYWFDAQQNTWFPKTP	LQVDDVLQRCREYLIKKINAENCVRLLSFADLFSCEELKQSAKRMVEHKFTAVYHQEAFMQLSHDLLIDILSSDNLNVEKEETVREAAMLWLEYNTESRSQYLSSVLSQIRIDALSEVTQRAWFQGLPPNDKSVVVQGLYKSMPKFFKPRLGMTKEEMMIFIEAAAENPGSLYSSVCYSPQAEKVYKLC+PPADLHKVGTLVTPDNDIYIAGGQVPLKNAKTNHSKSSKLQAAFRTVNCFYWFDAQQNTWFPKTP
208626	Query_446	14-contig_7115_1	579	gi|326922302|ref|XP_003207389.1|PREDICTED: pericentrin-like, partial [Meleagris gallopavo]	XP_003207389	1690	1	632.869	1631	0	58	553	649	1066	0	0	346	376	78	496	EVNDLTKLHVKQNQVLDVSDSSALSFPQALLKEKNQEIDHLNEQLRRLKYELMNSLEKYLLENYFLMLKEIVESFELKGTLQGNLLQLPCSEQCCHTANKVCLEIAIHLKSSILPAVVEEQKSEIEELRSLIEHLRGDQERLCKDKDEEVEQLHGVIEKLQKELAQFEPVCYEVSDNQGDIFQFGLEKSVENLQNELRKGLIDCQGDTDLDGRNALLLSRVRELEEELEVASADRRNLQQQLEEKKSQFKMEVEV	QLKDLTKLNVKQNQDLDVSDSSALSFPQALLKEKNQEIDHLNEQLRRLKY-------------------ELVNTLENK--------------------------------------VVEDQKSEIEELRSIIEHLRGDQERLSKDKDEEVEQLHGVIEKLQKELAQFGPVCHEVSDNQGDIFQFGLEKSVENLQKQLKKGLIDCQGDTDQGGRNALLLSKVRELEEELEFASAARKDLQQQLEEKESQIKMEVEI	++ DLTKL+VKQNQ LDVSDSSALSFPQALLKEKNQEIDHLNEQLRRLKY E+V + E K VVE+QKSEIEELRS+IEHLRGDQERL KDKDEEVEQLHGVIEKLQKELAQF PVC+EVSDNQGDIFQFGLEKSVENLQ +L+KGLIDCQGDTD GRNALLLS+VRELEEELE ASA R++LQQQLEEK+SQ KMEVE+
296023	Query_1002	2-contig_1746_1	1277	gi|326922393|ref|XP_003207433.1|PREDICTED: fibronectin-like [Meleagris gallopavo]	XP_003207433	2459	1	2451.4	6352	0	1	1253	1140	2438	0	0	1228	1234	72	1312	MDGQEREAPIIRRVTT-----------------------------RINGYRVTTAPTDGQQGSTLEEVVGADQTSCTFENLNPGVEYNVSVYAVKDDQESIPISKTITQEVPQLTDLSFVDITDSSIGLRWTPLNASTIIGYRITVVAAGESVPIFEDFVDSSVGYYTVTGLEPGIDYDISVITLINGGESAPTTLTQQTAVPPPTDLRFTNVGPDTMRVTWTAPTSIVLSSFLVRYSPVKKEEDVAELTISPSD	MDGQERETPIIRRVTTPLSPPTNLHLEPNPDTGILIVSWDRSTTPGISGYRVTTAPTDGQQGSTLEEVVGADQTSCTFENLNPGVEYNVSVYAVKDDQESIPISKTITQEVPQLTDLSFVDITDSSIGLRWTPLNASTIIGYRITVVAAGESVPIFEDFVDSSVGYYTVTGLEPGIDYDISVITLINGGESAPTTLTQQTAVPPPTDLRFTNVGPDTMRVTWTPPTSIVLSSFLVRYSPVKKEEDVAELTISPSD	MDGQERE PIIRRVTT I+GYRVTTAPTDGQQGSTLEEVVGADQTSCTFENLNPGVEYNVSVYAVKDDQESIPISKTITQEVPQLTDLSFVDITDSSIGLRWTPLNASTIIGYRITVVAAGESVPIFEDFVDSSVGYYTVTGLEPGIDYDISVITLINGGESAPTTLTQQTAVPPPTDLRFTNVGPDTMRVTWT PTSIVLSSFLVRYSPVKKEEDVAELTISPSD
264672	Query_243	1-contig_27449_1	532	gi|326922415|ref|XP_003207444.1|PREDICTED: carbamoyl-phosphate synthase [ammonia], mitochondrial-like [Meleagris gallopavo]	XP_003207444	1501	1	936.406	2419	0	50	532	42	569	0	0	465	480	45	528	AQTANLVLEDGTKMKGYSFGYPSSTAGEVVFNTGISGYTEALTDPSYKGQILTLANPIVGNGGVPDTTALDDIGLRRFLESDGIKVSGLLVLDYSHEYSHWQAVKSLGEWLQEEK-------------------GTILGKIEFEGQPTEFADPNKQNLIAEVSTKEVKVYGKGNPVKIVAVDCGLKNNVIRLLVKQGAEVHLVPWDHDFTSMEYDGLIISGGPGDPMKAQEVIQNVRKVLESNRPEPLFGIGVGN	AQTANLVLEDGTKMKGYSFGYPSSTAGEVVFNTGISGYTEALTDPSYKGQILTLANPIVGNGGVPDTTALDEIGLRRFLESDGIKVSGLLVLDYSNEYSHWQAARSLGEWLQEEKVPALYGIDTRMLSKLIRDKGTVLGKIEFEGQPTEFADPNKQNLIAEVSTKEVKVYGKGNPIKIVAIDCGLKNNVIRLLVKQGAEVHLVPWNHDFTRMEYDGLVISGGPGDPMKAQEVIQNVRKVLESSRPEPLFGIGMGN	AQTANLVLEDGTKMKGYSFGYPSSTAGEVVFNTGISGYTEALTDPSYKGQILTLANPIVGNGGVPDTTALD+IGLRRFLESDGIKVSGLLVLDYS+EYSHWQA +SLGEWLQEEK GT+LGKIEFEGQPTEFADPNKQNLIAEVSTKEVKVYGKGNP+KIVA+DCGLKNNVIRLLVKQGAEVHLVPW+HDFT MEYDGL+ISGGPGDPMKAQEVIQNVRKVLES+RPEPLFGIG+GN
394002	Query_572	2-contig_15788_1	513	gi|326922819|ref|XP_003207642.1|PREDICTED: interferon-induced helicase C domain-containing protein 1-like [Meleagris gallopavo]	XP_003207642	1001	1	932.169	2408	0	7	500	355	847	0	0	450	475	11	499	LLENLLIMEQHLRREFNPFLKRWYRVIGLSGDSELKISFPEVVRRNDVIICTAQILENSLLNATEDDE-----DFSLMIIDECHHTQKEGVYNNIMRRYLKDKIKNRKLAKENKPLIPQPQILGLTASPGVGGARTYSKAEEHILKICANLDACKIMTVIKHASQLKDLVKEPFKKTVIADDKRKDPFRERIIEIMKEIEKYCQLYPKSEFGSQPYEQWVIREEKKAAKEEKRKERVCAEHLKKYNDALQINDTI	LVNKVPLVEQHLRKEFNPFLKRWYQVIGLSGDSELKISFPEVVKRNDVIICTAQILENSLLNATEEDEGVHLSDFSLMIIDECHHTQKEGVYNNIMRRYLKDKIKNRKQAKENKPLIPQPQILGLTASPGVGGAKSRPKAEEHILKICANLDACRIMTVTEHASQLKNQVKDPFKKTVIADDKRRDPFRERIIEIMQDIQKYCQLYPKSEFGSQPYEQWVIREERRAAKEEKRKERVCAEHLKKYNDALQINDTI	L+ + ++EQHLR+EFNPFLKRWY+VIGLSGDSELKISFPEVV+RNDVIICTAQILENSLLNATE+DE DFSLMIIDECHHTQKEGVYNNIMRRYLKDKIKNRK AKENKPLIPQPQILGLTASPGVGGA++ KAEEHILKICANLDAC+IMTV +HASQLK+ VK+PFKKTVIADDKR+DPFRERIIEIM++I+KYCQLYPKSEFGSQPYEQWVIREE++AAKEEKRKERVCAEHLKKYNDALQINDTI
100805	Query_730	25-contig_3523_1	392	gi|326922912|ref|XP_003207686.1|PREDICTED: c-X-C chemokine receptor type 1-like [Meleagris gallopavo]	XP_003207686	358	1	645.195	1663	0	34	377	1	344	0	0	334	339	0	344	MGTFSADELFDILYNYTSDYGNYSLALPDIDVSSSPCRNEGSVANKYFVAFIYCLVFLLSMVGNGLVVLVVTSSHMNRSVTDIYLLNLAVADLLFALSLPLWAAYWAHEWVFGTVICKAISVLQESNFYSGILLLACISVDRYLAIVYATRAATEKRHWVKFVCVGIWVFSVLLSLPVLLFREAFVSDRNGTVCYERIGNENTTKWRVVLRVLPQTFGFALPLLVMLFCYGVTVHTLLQTKNVQKQRAMKVILAV	MGTFYADELFDILYNYTSDYGNYSLALPDIDGSSSPCRNEGSVANKYLVAFIYCLVFLLSMVGNGLVVLVVTSSHMNRSVTDIYLLNLAVADLLFALSLPLWAAYWAHEWVFGTVMCKAISVLQESNFYSGILLLACISVDRYLAIVYATRAVTEKRHWVKFVCVGIWVFSVLLSLPVLLFREAFVSDRNGTVCYERIGNENTTKWRVVLRVLPQTFGFALPLLIMLFCYGVTVHTLLQTKNVQKQRAMKVILAV	MGTF ADELFDILYNYTSDYGNYSLALPDID SSSPCRNEGSVANKY VAFIYCLVFLLSMVGNGLVVLVVTSSHMNRSVTDIYLLNLAVADLLFALSLPLWAAYWAHEWVFGTV+CKAISVLQESNFYSGILLLACISVDRYLAIVYATRA TEKRHWVKFVCVGIWVFSVLLSLPVLLFREAFVSDRNGTVCYERIGNENTTKWRVVLRVLPQTFGFALPLL+MLFCYGVTVHTLLQTKNVQKQRAMKVILAV
222359	Query_776	70-contig_1260_1	1805	gi|326922984|ref|XP_003207722.1|PREDICTED: hypothetical protein LOC100546146 [Meleagris gallopavo]	XP_003207722	1171	1	960.288	2481	0	1111	1621	1	514	0	0	471	486	5	515	MTYINVDERQEHCRVILSCQNNQLCAQHGLKEFSVSSMHPLKNLDTHIFSGDFRTLHSCHTGKALLASPVENRMYRSVENLHWATVADSGLYSHCRSLDNEIIFRYRGTRQWSEGCVDVAPVRSTLDSLRNLSLHPKQTSQSAQNVLLPPFVRVPQWLFPSAEDRAVPEDAKKELKEKLRLHSSKVAEPSKPVRPQAALTDLTAQEFSECQVCQQYKNGCAVSCCTVLVEHAALRHGLTGRQRLCVAHRIISPED	MTYINVDERQEHCRVILSCQNNQLCAQHGLKEFSVSSMHPLKNLDTHIFSGDFHTLHSCHTGKALLANPVEKRMYRSVENLHWATVADSGLYSHCRSLDNEIIFRYRGTRQWSEGCVDVAPVRSTLDSLRNLSIRPKQTSQSAQNVLLPPYVKVPQWLFPSAEDRALREDAKKELKEKLRLHSSKVAEPSKPVRPQAALTDLTAQEFSECQMCQQYKNGCAVSCCTVLVEHAALRHGLTGRQRLCVAHRIISPED	MTYINVDERQEHCRVILSCQNNQLCAQHGLKEFSVSSMHPLKNLDTHIFSGDF TLHSCHTGKALLA+PVE RMYRSVENLHWATVADSGLYSHCRSLDNEIIFRYRGTRQWSEGCVDVAPVRSTLDSLRNLS+ PKQTSQSAQNVLLPP+V+VPQWLFPSAEDRA+ EDAKKELKEKLRLHSSKVAEPSKPVRPQAALTDLTAQEFSECQ+CQQYKNGCAVSCCTVLVEHAALRHGLTGRQRLCVAHRIISPED
288164	Query_205	5-contig_13238_1	1082	gi|326923039|ref|XP_003207749.1|PREDICTED: hypothetical protein LOC100550444 [Meleagris gallopavo]	XP_003207749	3699	1	1083.94	2802	0	27	681	1276	1932	0	0	529	580	2	657	LNAVLEKQHLLEQTPISVHPYYHSLGTALYGEERPVIKMPDSVVMPLDPYIWQFLQGRDGLTEAINKEMAVCHCCLKWPQAGCAQPEVTLCPSSSISEQKKTLIKLIKTWKQYVSTEFSRIMSRYVAIKCKVSSVEWKDMKKRLMKDAGLIIIDISEEMVVIAGNRAAVDRAETEVRECVEKAMEESEREKQNIEISVSIIPGKYAVLHNAGLEENIHKEYPCLKISYDDTKKTVQLCGLPAEVYKIKANLLEKL	LSTVLEKQHFLEQTPVSVYPYYHSLGTALYGEERPVTKMPDSVVMPLDPYVWQFLQRQDRLIEAINQEMANCHCCLKWPQTDCAQPEITLCPSSSISEQKETMIKLIKTWKQDVSTEFSCIISRYIATKCKVSSAKWKDVKNKWMKDADLIITDISEEMVVIAGNRAAVDSAEKEVRECMEKAMEESERKKQTIEISVSITPGNYAVLHNAGLEENIHEEYPCLKISYDDTKKTVQLCGLSTEVYKTKANLLEKV	L+ VLEKQH LEQTP+SV+PYYHSLGTALYGEERPV KMPDSVVMPLDPY+WQFLQ +D L EAIN+EMA CHCCLKWPQ CAQPE+TLCPSSSISEQK+T+IKLIKTWKQ VSTEFS I+SRY+A KCKVSS +WKD+K + MKDA LII DISEEMVVIAGNRAAVD AE EVREC+EKAMEESER+KQ IEISVSI PG YAVLHNAGLEENIH+EYPCLKISYDDTKKTVQLCGL EVYK KANLLEK+
50079	Query_894	29-contig_15052_1	1300	gi|326923353|ref|XP_003207901.1|PREDICTED: calmodulin-regulated spectrin-associated protein 1-like [Meleagris gallopavo]	XP_003207901	1593	1	1531.92	3965	0	116	926	453	1265	0	0	779	797	2	813	RPLSQPTPFALHHSASTDVDPGSGDSISLARSISKDSLASNIVNVTPKNQPHPQSVKSNGKSLLNNVEIEDEDEELIAIIRSEERPNRGDQELQNTAARIPNVAATAWSPKVNSESSESKPDSFYLEPLMPAVLKPAKEKQIINKEDECGEGKQRSFITKRLNEGHLPLVRKKTSSSHGDHDLNRTFTPISSSDFTPVTESGAADSVALAEAGLEASRPLASSSLDPSAQDQPTGGFFLHAAKSDDDIASKVNAS	RPLSQPTPFALHHSASTDVDPGSGDSISLARSISKDSLASNIVNVTPKNQPHPPSLKTNGKSLLNNVEIEDEDEELIAIIRSEERPNRGDVELQNAAARVPSIVATAWSPKINSESSESKPDSFYLEPLMPAVLKPAKEKQIINKEDECGEGKQRSFITKRLNEGHLPLIRKKTSSSHGDHDLSRTFTPISSSDFTPVTESGAADSVALVEAGLEASRPLASSSLDPSAQDQPTGGFFLHAAKSDDDIASKVNVS	RPLSQPTPFALHHSASTDVDPGSGDSISLARSISKDSLASNIVNVTPKNQPHP S+K+NGKSLLNNVEIEDEDEELIAIIRSEERPNRGD ELQN AAR+P++ ATAWSPK+NSESSESKPDSFYLEPLMPAVLKPAKEKQIINKEDECGEGKQRSFITKRLNEGHLPL+RKKTSSSHGDHDL+RTFTPISSSDFTPVTESGAADSVAL EAGLEASRPLASSSLDPSAQDQPTGGFFLHAAKSDDDIASKVN S
25562	Query_675	1-contig_16454_1	1290	gi|326923607|ref|XP_003208026.1|PREDICTED: inactive ubiquitin carboxyl-terminal hydrolase 54-like [Meleagris gallopavo]	XP_003208026	1497	1	2152.87	5577	0	37	1282	127	1385	0	0	1129	1162	67	1286	GREPSISSDTRTDSSTDSYRYKQAHHESVVSHFSSDSQGTVIYNVDNDAASQSSRDTEKDKAQKSQLYSVGAINPLLSRHLTDSECNQRHISKKSSLADRKRSSSRSRRKGDETQSSGYHRE--TLKEKQAPRAAPKPSSSTSRLREFKETVSNMIHNRPQQISQTSQNSPHGGSRMDQAETRPSKSLSVHSRDWEVESTSSESKSSSSSRYRPSWRPKRESLNIDSIFSKDKRKHCGYTQLSPFSEEAGKELME	GREPSISSDTRTDSSTDSYPYKQAHHESVVSHFSSDSQGTVIYNVDNDAASQSSRDTG---------------------HLTDSECNQRHISKKSSLADRKRSSSRSRRKGDESQSSGYHSEGETLKEKQAPRAAPKPSSSTSRLREFKETVSNMIHNRPQQTSQTNQNSPHGGGHMDQAETRPSKSLSVHSRDWEVESTSSESKSSSSSRYRPSWRPKRESLNIDSIFSKDKRKHCGYTQLSPFSEEAGKELME	GREPSISSDTRTDSSTDSY YKQAHHESVVSHFSSDSQGTVIYNVDNDAASQSSRDT HLTDSECNQRHISKKSSLADRKRSSSRSRRKGDE+QSSGYH E TLKEKQAPRAAPKPSSSTSRLREFKETVSNMIHNRPQQ SQT+QNSPHGG MDQAETRPSKSLSVHSRDWEVESTSSESKSSSSSRYRPSWRPKRESLNIDSIFSKDKRKHCGYTQLSPFSEEAGKELME
342352	Query_931	1-contig_42108_1	795	gi|326923677|ref|XP_003208061.1|PREDICTED: WD repeat- and FYVE domain-containing protein 4-like [Meleagris gallopavo]	XP_003208061	3042	1	973.385	2515	0	45	643	385	981	0	0	507	531	36	616	SCRMTVKNLQAFQVLQSIFQKSNDQHLCGTVLGAIGTIWAWDTVNFFLLEWTLQPISQFIDIIHLKPHPVQDQFFKLVETIVLDMSYIPHEILKKVQYLIKENVEPFCTLTALRCLLSITKKDPLFSDIFRDSGLLGLLLALLRKQAKILRKSAGTPLPGLEEGTEKELNAVMLKMVAALTVGC--------DYGMVPYIKIFLDDECYRGAALSILEQLSVINYEEYMSIVIGALCSSTQGELHLKLDLLKSLL	SSGMTVKNLQAFQVLQSIFQKSNDQHLCGTVLGAIGTIWAWDTVNFFLLEWTLQPINQFIDIIHFKPHPVQVQFFRLVESIVLDLSYIPHEILKKVQYLIKENVVPFCTLTALQCLLSITKKDLLFSDIFRDSGLLGLLLAVLRKQAKILRKSAGTSLPGVEEGTDKELNAVMLKMVAALTVGCVRNSVVLKDYGMVPYIKIFLDDECYRGATLSILEQLSVINYEEYMSIVIGALCSSTQGELHLKLDLLKSLL	S MTVKNLQAFQVLQSIFQKSNDQHLCGTVLGAIGTIWAWDTVNFFLLEWTLQPI+QFIDIIH KPHPVQ QFF+LVE+IVLD+SYIPHEILKKVQYLIKENV PFCTLTAL+CLLSITKKD LFSDIFRDSGLLGLLLA+LRKQAKILRKSAGT LPG+EEGT+KELNAVMLKMVAALTVGC DYGMVPYIKIFLDDECYRGA LSILEQLSVINYEEYMSIVIGALCSSTQGELHLKLDLLKSLL
109142	Query_258	14-contig_3493_1	603	gi|326923804|ref|XP_003208124.1|PREDICTED: dynamin-binding protein-like [Meleagris gallopavo]	XP_003208124	1508	1	813.913	2101	0	60	519	90	549	0	0	403	428	0	460	GDLVVLGGNLASSWLQGRSSWGSKGFFPSSCVRELCLSVRSRQLSHSSLLEVPAYSLGQARALMGLSAQLEEELDFREGDVINIIGIPEPGWFEGELQGHRGIFPEGFVELLTPLRAAGTSEDQEPAGTCDTNGTVPTRQEEHVREDKGQEPGSTYGVALYQFQALESEELDFDVGDRIRIVGILDDGWLEGELRGKRGIFPHRFVRLEASDPCREKMGVGDPQAGGSCEVTIHQDSETTCSKVLPLPGKDSWDK	GDLVILGGSLASSWLQGRSSWGSKGFFPSSCVRELCLSVRSRQLSHSSLLEVPAYSLGQARALMGLSAQLEEELDFREGDVINIIGIPEPGWFEGELRGHRGIFPEGFVELLTPLRAAGTSEDQEPAGTCDTNGTVPTKQEEDGREDERQEPGSTYGVALYQFQALESEELDFEVGDRIRIVGILEDGWLEGELRGKRGIFPHRFVRLEASDPCREKVGAGDSQAGGSCEVTVHQDLESTCSRVLPLPEKDSWNK	GDLV+LGG+LASSWLQGRSSWGSKGFFPSSCVRELCLSVRSRQLSHSSLLEVPAYSLGQARALMGLSAQLEEELDFREGDVINIIGIPEPGWFEGEL+GHRGIFPEGFVELLTPLRAAGTSEDQEPAGTCDTNGTVPT+QEE RED+ QEPGSTYGVALYQFQALESEELDF+VGDRIRIVGIL+DGWLEGELRGKRGIFPHRFVRLEASDPCREK+G GD QAGGSCEVT+HQD E+TCS+VLPLP KDSW+K
64627	Query_174	9-contig_18945_1	618	gi|326923860|ref|XP_003208151.1|PREDICTED: bifunctional protein NCOAT-like [Meleagris gallopavo]	XP_003208151	870	1	1176.77	3043	0	19	598	28	607	0	0	567	570	0	580	WDMNPWHDLVTLLQKWGLNTYLYAPKDDYKHRMFWREMYSVEEAEQLMTLISAAREHEIEFIYAISPGLDITFSNPKEVSTLKRKLDQVSQFGCRSFALLFDDIDHNICAADKEVFSSFAHAQVSITNEIYQYLGEPDTFLFCPTEYCGTFCYPNVAQSPYLRTVGEKLLPGIDVLWTGPKVVSKDIPVESIEEVSKIIRRAPVIWDNIHANDYDQKRLFLGPYKGRSTELIPRLKGVLTNPNCEFEANYVAIHT	WVMEQRKELFRRLQKWGLNTYLYAPKDDYKHRMFWREMYSVEEAEQLMTLISAAREHEIEFIYAISPGLDITFSNPKEVSTLKRKLDQVSQFGCRSFALLFDDIDHNMCAADKEVFSSFAHAQVSITNEIYQYLGEPDTFLFCPTEYCGTFCYPNVAQSPYLRTVGEKLLPGIDVLWTGPKVVSKDIPVESIEEVSKIIRRAPVIWDNIHANDYDQKRLFLGPYKGRSTELIPRLKGVLTNPNCEFEANYVAIHT	W M +L LQKWGLNTYLYAPKDDYKHRMFWREMYSVEEAEQLMTLISAAREHEIEFIYAISPGLDITFSNPKEVSTLKRKLDQVSQFGCRSFALLFDDIDHN+CAADKEVFSSFAHAQVSITNEIYQYLGEPDTFLFCPTEYCGTFCYPNVAQSPYLRTVGEKLLPGIDVLWTGPKVVSKDIPVESIEEVSKIIRRAPVIWDNIHANDYDQKRLFLGPYKGRSTELIPRLKGVLTNPNCEFEANYVAIHT
79140	Query_1060	2-contig_1593_1	1382	gi|326924258|ref|XP_003208347.1|PREDICTED: BCL-6 corepressor-like protein 1-like [Meleagris gallopavo]	XP_003208347	1490	1	1490.32	3857	0	370	1229	53	917	0	0	791	810	7	866	LSPFLLQVELTAVSGGGSGAQDASGKVEEKIGPKLEEQPPDPNPNPECVGKTVKDDVQGPLASQGDGRGQEPAVPRAAEQESSSADAAGMPADPPSDKQADVPPACTVAPENEPAGKGKTTPSTGAPGPAVLAEGTLSVVASSCSTSASTAATFTLSRVCFPTSQAPAMHKVPLSFQPGTVLSPSQSLVYIPPPTCGQPLTVATLPSTLGVSSTLTLPVLPSYLPERCVPGIIASPELRSYPYTFSVTRPLASDA	VSSSLSKVELTAVSSGGSSAQDASGKVEEKIGPKLEEQPPDPNPNPECVGKTVKDDVQGPLASQGDGRGQEPAVPQAAEPESSSADVAGMPADPSSDKQADVPPICSVAPENEAAGKEKTTPSTGAQGPAVLAEGTLSVVATSCSTSASTPATFTLSRVCFPTSQAPAMHKVPLSFQPGTVLSPNQPLVYIPPPSCGQPLTVATLPSTLGVSSTLTLPVLPSYLPERCVPGIIASPELRSYPYTFSVTRPLASDA	+S L +VELTAVS GGS AQDASGKVEEKIGPKLEEQPPDPNPNPECVGKTVKDDVQGPLASQGDGRGQEPAVP+AAE ESSSAD AGMPADP SDKQADVPP C+VAPENE AGK KTTPSTGA GPAVLAEGTLSVVA+SCSTSAST ATFTLSRVCFPTSQAPAMHKVPLSFQPGTVLSP+Q LVYIPPP+CGQPLTVATLPSTLGVSSTLTLPVLPSYLPERCVPGIIASPELRSYPYTFSVTRPLASDA
44650	Query_13	13-contig_934_1	765	gi|326924318|ref|XP_003208376.1|PREDICTED: WD repeat-containing protein 44-like [Meleagris gallopavo]	XP_003208376	911	1	1165.98	3015	0	4	682	7	794	0	0	644	655	129	798	DSDTEEFYDAPEDVHLAAASPAPSPSKVGSFVLKDVDSKLHKAGNETFVQEMKQDDSKEIIDSIIEESQKAQQLDDDSLASRGKGLTVATSDANAWISGAGVINSVPEVLAAKAPLQEDPSEPVHQSECEDAELESGKLLFTSEEQETDKLTKVTNTTDHKKDETEAQEETSKNEDTTDKKEVNTLEQVTSDVSTKDPLTAEEMPPAKPPRQLTVEPDIVASTKKPVPARPPPPTNVPPPRPPPPARPAPPPRKK	DNHTQEFYDAPEDVHLVAASPAPSPSKVGSFVLKDVDSKLHKAGNETFVQEMKQDDSKEIIDSIIEESQKAQQLDDDSLASRGKGLTVPTSDANAWIAGAGIINSIPEVLAAKASLQEDPSEPVHQSVCEDTELESGRPLFTSEEQETGKLTKLTNATDHKKDETEAQEETSKDEDITDKKEANTLEQVTSDLSTKDLPSAEEMPPAKPPRHLTVEPDIVASTKKPVPARPPPPTNVPPPRPPPPARPAPPPRKK	D+ T+EFYDAPEDVHL AASPAPSPSKVGSFVLKDVDSKLHKAGNETFVQEMKQDDSKEIIDSIIEESQKAQQLDDDSLASRGKGLTV TSDANAWI+GAG+INS+PEVLAAKA LQEDPSEPVHQS CED ELESG+ LFTSEEQET KLTK+TN TDHKKDETEAQEETSK+ED TDKKE NTLEQVTSD+STKD +AEEMPPAKPPR LTVEPDIVASTKKPVPARPPPPTNVPPPRPPPPARPAPPPRKK
167108	Query_892	15-contig_934_1	762	gi|326924349|ref|XP_003208391.1|PREDICTED: LOW QUALITY PROTEIN: dedicator of cytokinesis protein 11-like [Meleagris gallopavo]	XP_003208391	2069	1	1219.14	3153	0	37	743	31	855	0	0	645	651	204	868	GFAHEKTKVVEPLDYENVILQRKVQIYSDPLRDLLIFPIEDVSLSVISRQRRTVQSTVPEDALKKAQSLFVKERCCDFS----------------------KSFRPDKIPSHVFEIDEDFEKDEDSSSLCSQKGGVIKQGWLHKANVNSTITVTMRVFKRRYFYLSQLTDGSYILNSYKDEKISKESKGCIFLDACNDVVQCPKMRRYAFELKTIDKYSHYLAAETEQEMEEWLVTLRKIIQSNTESSVQEKKDT	SFVLEKTKVVEPLDYENVILQRKVQIYSDPLRDLLIFPIEDVSLSVISRQRRTVQSTVPEDALKKAQSLFVKECIKTYSSDWHVVNYKYEEYSGDFRMLPCKSFRPDKIPSHVFEIDEDFEKDEDSSSLCSQKGGVIKQGWLHKANVNSTITVTMRVFKRRYFYLSQLTDGSYILNSYKDEKISKESKGCIFLDACNDVVQCPKMRRYAFELKTIDKYSHYLAAETEQEMEEWLVTLRKIIQSNSESSVQEKKDT	F EKTKVVEPLDYENVILQRKVQIYSDPLRDLLIFPIEDVSLSVISRQRRTVQSTVPEDALKKAQSLFVKE +S KSFRPDKIPSHVFEIDEDFEKDEDSSSLCSQKGGVIKQGWLHKANVNSTITVTMRVFKRRYFYLSQLTDGSYILNSYKDEKISKESKGCIFLDACNDVVQCPKMRRYAFELKTIDKYSHYLAAETEQEMEEWLVTLRKIIQSN+ESSVQEKKDTV
153105	Query_882	37-contig_137_1	1508	gi|326924409|ref|XP_003208420.1|PREDICTED: protein FAM46C-like [Meleagris gallopavo]	XP_003208420	391	1	802.742	2072	0	228	617	1	390	0	0	384	388	0	390	MTEDSDHRFSNLTWDQIKILDQVLAEVIPIHGRGNFPTLEVKLKDIIRVVKEQLIEKQISIRDIRLNGSTASHILVKQNGTSYKDLDIIFGVELPSELEFQIVKEAVLNCLLDFLPKCVNKEKITAQTMKDAYVQKMVKVSTDHDRWSLISLSNNSGKNVELKFVSSLRRQFEFSVDSFQIVLDSILNVYRETDCKLTEDSHPTIIAESMYGDFNEAMDHLKYKLISTRNPEEIRGGGLLKYSNLLVRDFKPADE	MTEDLDHRFSSLTWDQIKILDQVLAEVIPIHGRGNFPTLEVKPKDIIRVVKEQLIEKQINIRDIRLNGSTASHILVKQNGTSYKDLDIIFGVELPSELEFQVVKEAVLNCLLDFLPKCVNKEKITAQTMKDAYVQKMVKVSTDHDRWSLISLSNNSGKNVELKFVNSLRRQFEFSVDSFQIVLDSILNVYRETDCKLTEDSHPTIIAESMYGDFNEAMDHLKYKLISTRNPEEIRGGGLLKYSNLLVRDFKPADE	MTED DHRFS+LTWDQIKILDQVLAEVIPIHGRGNFPTLEVK KDIIRVVKEQLIEKQI+IRDIRLNGSTASHILVKQNGTSYKDLDIIFGVELPSELEFQ+VKEAVLNCLLDFLPKCVNKEKITAQTMKDAYVQKMVKVSTDHDRWSLISLSNNSGKNVELKFV+SLRRQFEFSVDSFQIVLDSILNVYRETDCKLTEDSHPTIIAESMYGDFNEAMDHLKYKLISTRNPEEIRGGGLLKYSNLLVRDFKPADE
72280	Query_381	2-contig_3145_1	1690	gi|326924660|ref|XP_003208543.1|PREDICTED: SLIT and NTRK-like protein 2-like [Meleagris gallopavo]	XP_003208543	857	1	1489.94	3856	0	902	1675	1	774	0	0	745	759	0	774	MLKGVWLLSLLTVAGILQIESRKPAKDICSKSRCPCEEKENVLNINCENKGFTTVSLLLPPPSKIYQLFLNGNALTRLFPNEFVNYSNAVTLHLGNNDMHEIHTGAFSGLRILKRLHLNNNKLEVLKEDTFLGLESLEYLQADYNYISAIEAGAFNKLNKLKVLILNDNLLLSLPSNVFRFVLLTHLDLRGNRLKMMPFAGVLEHIGGIMEIQLEENPWNCTCDLLPLRAWLDTITVFVGEIVCETPFRLHGKDV	MLKGVWLLSLLTVAGISQIESRKPAKDICSKSRCPCEEKENVLNINCENKGFTTVSLLLPPPSKIYQLFLNGNALTRLFPNEFVNYSNAVTLHLGNNDMQEIHTGAFSGLRTLKRLHLNNNKLEVLKEDTFLGLESLEYLQADYNYISAIEAGAFNKLNKLKVLILNDNLLLSLPSNVFRFVLLTHLDLRGNRLKMMPFAGVLEHIGGIMEIQLEENPWNCTCDLLPLKAWLDTITVFVGEIVCETPFRLHGKDV	MLKGVWLLSLLTVAGI QIESRKPAKDICSKSRCPCEEKENVLNINCENKGFTTVSLLLPPPSKIYQLFLNGNALTRLFPNEFVNYSNAVTLHLGNNDM EIHTGAFSGLR LKRLHLNNNKLEVLKEDTFLGLESLEYLQADYNYISAIEAGAFNKLNKLKVLILNDNLLLSLPSNVFRFVLLTHLDLRGNRLKMMPFAGVLEHIGGIMEIQLEENPWNCTCDLLPL+AWLDTITVFVGEIVCETPFRLHGKDV
307687	Query_114	6-contig_2221_1	684	gi|326924710|ref|XP_003208568.1|PREDICTED: protein transport protein Sec16B-like [Meleagris gallopavo]	XP_003208568	928	1	879.011	2270	0	35	661	290	816	0	0	476	490	102	628	REDLHKVDVVTFCQQKIASSCDLSTQRGRDSALLWKLLVLLCRQNGSMVGSDVAELLMQDRRQQERYKRQEPALGPVSLADEEWRQLGTLDLITGEVPPVVETQAQIVEKFTKLLYYGRKKDALVWAMRNHLWGHALFLSSKMDPRTYSWVLAGFTSTLATNDPLQTFFQLMSGRIPQAAQVCEQQAVPIVHLTPTRLMTTTSPHLHFPLLQSCGDSKWGDWRPHLAVLLSNKVGDMELNHRAIVTMGDTLAGKG	REDLHKVDVMTFCQQKIASSCDLSTQRGRDSALLWKLLVLLCRQNGSMVGSDVAELLMQDRRQQERYKRQEPALGPVSLADEEWRQL---DLITGEVPPVVETQAQIVEKFTKLLYYGRKKDALVWAMRNQLWGHALFLSSKMDPRTYSWVLTGFTSTLATNDPLQTFFQLMSGRIPQAA-------------------------------QSCGDAKWGDWRPHLAVLLSNKVGDLELNHRAIVTMGDALAGKG	REDLHKVDV+TFCQQKIASSCDLSTQRGRDSALLWKLLVLLCRQNGSMVGSDVAELLMQDRRQQERYKRQEPALGPVSLADEEWRQL DLITGEVPPVVETQAQIVEKFTKLLYYGRKKDALVWAMRN LWGHALFLSSKMDPRTYSWVL GFTSTLATNDPLQTFFQLMSGRIPQAA QSCGD+KWGDWRPHLAVLLSNKVGD+ELNHRAIVTMGD LAGKG
178412	Query_777	5-contig_21392_1	1320	gi|326924732|ref|XP_003208579.1|PREDICTED: laminin subunit gamma-1-like [Meleagris gallopavo]	XP_003208579	1571	1	2045.78	5299	0	282	1319	534	1571	0	0	1022	1029	0	1038	SYGQNLTFSFRVDRRDTRLSAEDLVLEGAGLRVSVPLIAQGNTYPSENPLTYTFRLHEAADYPWRPALSAFDFQKLLHNLTAIKIRGTYSERSAGHLDDVTITSAVLGAGVPAAWVESCSCPAGYEGQFCERCSPGYRRETPGLGPYSPCVPCTCNGHSETCDPETGVCDCRDNTAGSQCEKCSDGYYGDATAGTALDCQPCPCPGGSSCAVVPRTREVVCTSCQTGTTGKRCELCDDAYFGDPLGENGAVRPCR	SYGQNLTFSFRVDRRDTRLSAEDLVLEGAGLRVSVPLIAQGNSYPSESPLTYTFRLHEAADYPWRPALSAFDFQKLLHNLTAIKIRGTYSERSAGHLDDVTITSAVPGAGVPAAWVESCSCPAGYEGQFCERCSPGYRRETPGLGPYSPCVPCSCNGHSETCDPETGVCDCRDNTAGSQCEKCSDGYYGDATAGTALDCQPCPCPGGSSCAVVPRTREVVCTSCQTGTTGKRCELCDDAYFGDPLGENGAVRPCR	SYGQNLTFSFRVDRRDTRLSAEDLVLEGAGLRVSVPLIAQGN+YPSE+PLTYTFRLHEAADYPWRPALSAFDFQKLLHNLTAIKIRGTYSERSAGHLDDVTITSAV GAGVPAAWVESCSCPAGYEGQFCERCSPGYRRETPGLGPYSPCVPC+CNGHSETCDPETGVCDCRDNTAGSQCEKCSDGYYGDATAGTALDCQPCPCPGGSSCAVVPRTREVVCTSCQTGTTGKRCELCDDAYFGDPLGENGAVRPCR
92013	Query_421	10-contig_23208_1	1713	gi|326924891|ref|XP_003208656.1|PREDICTED: abnormal spindle-like microcephaly-associated protein homolog [Meleagris gallopavo]	XP_003208656	3297	1	1833.92	4749	0	572	1640	1679	2747	0	0	945	1003	0	1069	KKLKLKHRAAVKIQTAFRAHAARSKYQAMIQASVVIQRWYRTCKTSNRQRLTFLMTRAAVLTLQAAFRGYQVRKQIRRQHAAATAIQSAFRKFMALKTFRLRNDAALIIQRRYRASVISQKQRQEYVELRNCVVRLQAIWRGKAVRKEIQKKHSLATIIQSYYRMHVNRLKFKKLRQSTLVIQRYFKAYCLKEKQRAHYLKTKAAVLVLQSAYRGMTVRKQLRELRRAATIIQAAFRSYLVKKNYVKLRSAAVVI	KKLKLEHRSAVKIQAAFRAHATRKKYQAMIQASVVIQRWYRTCKTSNRQRLTFLKTRAAVLTLQAAFRGYQVRKQIRRQCAAATAIQSAFRKFMALKTFRLMNHAVLNIQRRYRAIVISRKQRQEYVELRNCVVRLQAIWRGKAARKKIQKMHNLATIIQSYYRMHVNQLKFKKLRRSTLVIQRYFRAYCMKKNQRARYLKTKAAVLVLQSAYRGMTVRKQLRELSKAATTIQAAFKSYLVKKDYVGLRSAAVVI	KKLKL+HR+AVKIQ AFRAHA R KYQAMIQASVVIQRWYRTCKTSNRQRLTFL TRAAVLTLQAAFRGYQVRKQIRRQ AAATAIQSAFRKFMALKTFRL N A L IQRRYRA VIS+KQRQEYVELRNCVVRLQAIWRGKA RK+IQK H+LATIIQSYYRMHVN+LKFKKLR+STLVIQRYF+AYC+K+ QRA YLKTKAAVLVLQSAYRGMTVRKQLREL +AAT IQAAF+SYLVKK+YV LRSAAVVI
136867	Query_973	4-contig_196_1	1117	gi|326924948|ref|XP_003208684.1|PREDICTED: receptor-type tyrosine-protein phosphatase C-like [Meleagris gallopavo]	XP_003208684	1225	1	1284.24	3322	0	219	1064	146	1224	0	0	690	750	237	1081	NNIDYRITIDKNDSTEVILENIKGNRKYDIFLGNSSISQVSGSNNRATLNRCERYTVKSENCGDIYLTIPPD------------------------------------------STSVKDYKKLSDGTILVNSLSPDTEYTCYITVHFFDKNFTKEKRIATDYASPKAPENLRVESNARNVTVTWMKPTSTSEKHIDGYFVMCNDTTKKNFIVNMTSFICDGLEPYSHGDVSVTAFKKSKYGDEIIEGEPVKDNF	NDIDDVIIVEKNNLPEVTLKNLKGNRKYSIWGKDGEISQVSASNNTVVLKWCRRYTVKSAGCNDMYLTIPPDEKRYTFNTTCIGNNTAKLHLNSLCRDCEDGCPNVAVSCKTNNSSSERTWKSIND-SISLKSLLSDSEYICSVTVHFFEKNFTNDINITTDYDAPKVPGNLTIDTTARNVTFTWVEPTSASEKHIDGYVVTCNDSVKHNVTVKQTSFTCHHLEPYSNGSVSISAFKNSKCGEEIFLGDPVKYVF	N+ID I ++KN+ EV L+N+KGNRKY I+ + ISQVS SNN L C RYTVKS C D+YLTIPPD S+S + +K ++D +I + SL D+EY C +TVHFF+KNFT + I TDY +PK P NL +++ ARNVT TW++PTS SEKHIDGY V CND+ K N V TSF C LEPYS+G VS++AFK SK G+EI G+PVK F
188957	Query_722	11-contig_4736_1	2235	gi|326925615|ref|XP_003209007.1|PREDICTED: transmembrane protein 22-like [Meleagris gallopavo]	XP_003209007	411	1	771.155	1990	0	1558	1938	1	381	0	0	370	375	0	381	MDSTSQKYPVKKRVKIHPNAVTVKYTSHYPQPGEEGYEDGNEDTGVFMEDSPRTRLLNAGKKRERTFFGTVDTQLQPAQPPKPSEMGHLQNFPEGNTLQSRKMWIVLFGSAVAHGCVALITRLISDRSKVPSLELIFIRSVLQVLSITAVCHYHEPPFGPKGYRLRLFFYGVCNVISITCAYTSFSIVPPSNGTIMWRATTTVFSAILAFLLVDEGMAYVDMVTVVGSVFGVCLVMIPNIVKEENSLLSTWKEAF	MDSSFQKYPVKKRVKIHPNTVTVKYTSHYPQPGEEGYEDGNEDTGVFMEDSPKTRLLNAGKKRERTFFGAIDTQLQPAQLPKPSEMGHFQNFPEGNILQSRKMWIVLFGSAVAHGCVALITRLISDRSKVPSLELIFIRSVLQVLSITAVCYYHEPPFGPKGYRLRLFFYGVCNVISITCAYTSFSIVPPSNGTIMWRATTTVFSAILAFLLVDEGMAYVDIVTVVGSVFGVCLVMIPNIVKEENSLLSTWKEAF	MDS+ QKYPVKKRVKIHPN VTVKYTSHYPQPGEEGYEDGNEDTGVFMEDSP+TRLLNAGKKRERTFFG +DTQLQPAQ PKPSEMGH QNFPEGN LQSRKMWIVLFGSAVAHGCVALITRLISDRSKVPSLELIFIRSVLQVLSITAVC+YHEPPFGPKGYRLRLFFYGVCNVISITCAYTSFSIVPPSNGTIMWRATTTVFSAILAFLLVDEGMAYVD+VTVVGSVFGVCLVMIPNIVKEENSLLSTWKEAF
252061	Query_778	54-contig_2530_1	2033	gi|326925651|ref|XP_003209024.1|PREDICTED: male-specific lethal 2 homolog [Meleagris gallopavo]	XP_003209024	539	1	976.082	2522	0	973	1462	3	492	0	0	475	481	0	490	SFFSSGNLLQDPIAPTNSTCQHYVCKTCKGKKMMMKPSCSWCKDYEQFEENKQLSILVNCYKKLCEYITQTPLARDIIQAVDCSADLLALLKDGSPLHEETEKPSDTALSLCLTHSPVPSTSELTNDPPAALTSKPESTQDADARGSVINGLPNCNGLSVDKLGVNIPSPEHANTIDVCSTGEYMKNEETPSSLQPVCDPVSTSDLCTTGIDICSFSEDIKPGGSLLLSVEEVLRSLETVSSTEVCGSNLQPSLE	SVGEAGNLLQDPIAPTNSTCQHYVCKTCKGKKMMMKPSCSWCKDYEQFEENKQLSILVNCYKKLCEYITQTPLARDIIQAVDCSADLLALLKDGSPLHEETEKSSDTALALCLTHSPVPSTSELTSDPPANLTSKPESTQNVDIRGSVINGLPNCNGLSVDKLGVNIPSPEHANTIDVCSTGEYMKNEDNSSSLQPVCDPVSTSDLCTTGIDICSFSEDIKPGGSLLLSVEEVLRSLETVSNTEVCGSNLQPSLE	S +GNLLQDPIAPTNSTCQHYVCKTCKGKKMMMKPSCSWCKDYEQFEENKQLSILVNCYKKLCEYITQTPLARDIIQAVDCSADLLALLKDGSPLHEETEK SDTAL+LCLTHSPVPSTSELT+DPPA LTSKPESTQ+ D RGSVINGLPNCNGLSVDKLGVNIPSPEHANTIDVCSTGEYMKNE+ SSLQPVCDPVSTSDLCTTGIDICSFSEDIKPGGSLLLSVEEVLRSLETVS+TEVCGSNLQPSLE
21022	Query_830	15-contig_9547_1	1325	gi|326925938|ref|XP_003209163.1|PREDICTED: platelet glycoprotein V-like [Meleagris gallopavo]	XP_003209163	630	1	997.268	2577	0	134	712	1	579	0	0	512	541	0	579	MLVIRLSVLIKLFFHVDASFCPEKCDCSIKNGIHCSGPHINDLELLNLPCNMSKIHITNTNITYVQDVFSGMGELQHLILSSNNIALISPVAFKGLRRLKALMLPNNKLVELPPELFNDTVHLQQLIIENNMLKSIQENLFDRLGSLEELFLNKNQLTALPSGVLKKLAKLKVLNLSRNSLAALPRNIFSALTKLEKLMLYFNRLSSIESGLFDSLRELLELFLHSNGIESIAPDVFHHLHKLRSLTLSRNKLEI	MLVIRLSVVIKLFFQLEASVCPEKCDCSFKNAIHCSGPRIKDLESLNLPCNMTKIHITNTNVTYVQDVFAGMGELQHLILSSNNIALISPVAFKGLRRLKALKLLDNNLVELPPDVFNDTVQLQQLIIENNRLKSIQENLFDRLGSLEELFLNKNQLRSLPSGVLKKLAKLKVLNLSRNSLAVLPRNIFSALTKLEKLMLYFNRLSSIESGIFDSLRELLELFLHSNDIQSIAPDVFHHLHKLRSLTLSRNKLEI	MLVIRLSV+IKLFF ++AS CPEKCDCS KN IHCSGP I DLE LNLPCNM+KIHITNTN+TYVQDVF+GMGELQHLILSSNNIALISPVAFKGLRRLKAL L +N LVELPP++FNDTV LQQLIIENN LKSIQENLFDRLGSLEELFLNKNQL +LPSGVLKKLAKLKVLNLSRNSLA LPRNIFSALTKLEKLMLYFNRLSSIESG+FDSLRELLELFLHSN I+SIAPDVFHHLHKLRSLTLSRNKLEI
252169	Query_97	3-contig_6690_1	381	gi|326926194|ref|XP_003209289.1|PREDICTED: MDS1 and EVI1 complex locus protein EVI1-like [Meleagris gallopavo]	XP_003209289	1245	1	769.615	1986	0	1	380	457	836	0	0	378	379	0	380	MDKTSMVNMNHANPGLADYFGANRHPAGLTFPTAPGFSFSFPGLFPSGLYHRPPLLPTSSPVKGLPSADQTNKSQSPLMTNPQILPATQDILKALNKQPSVGENKPVELQPERSSEERPHEKLSDQSESSDLDDVSTPSGSDLETTSGSDLESDIESEKEKFKENGKMFKDKVSSLQSLASINNKKEHSNHSIFSPSLEEQTAVSGAVNDSIKAIASIAEKYFGSTGLVGLQDKKVGALPYPSMFPLPFFPAFSQ	MDKTSMVNMNHANPGLADYFGANRHPAGLTFPTAPGFSFSFPGLFPSGLYHRPPLLPTSSPVKGLPSADQTNKSQSPLMTNPQILPATQDILKALNKQPSVGENKPVELQPERSSEERPHEKLSDQSESSDLDDVSTPSGSDLETTSGSDLESDIESEKEKFKENGKMFKDKVSSLQSLASINNKKEHSNHSIFSPSLEEQTAVSGAVNDSIKAIASIAEKYFGSTGLVGLQDKKVGALPYPSMFPLPFFPAFSQ	MDKTSMVNMNHANPGLADYFGANRHPAGLTFPTAPGFSFSFPGLFPSGLYHRPPLLPTSSPVKGLPSADQTNKSQSPLMTNPQILPATQDILKALNKQPSVGENKPVELQPERSSEERPHEKLSDQSESSDLDDVSTPSGSDLETTSGSDLESDIESEKEKFKENGKMFKDKVSSLQSLASINNKKEHSNHSIFSPSLEEQTAVSGAVNDSIKAIASIAEKYFGSTGLVGLQDKKVGALPYPSMFPLPFFPAFSQ
174677	Query_117	10-contig_14229_1	1572	gi|326926265|ref|XP_003209323.1|PREDICTED: 1-phosphatidylinositol-4,5-bisphosphate phosphodiesterase eta-1-like [Meleagris gallopavo]	XP_003209323	1694	1	1099.35	2842	0	811	1482	1002	1674	0	0	566	600	15	680	ANSDGGTNAKETTLKESLLVCSEQTANISNLASPLRKESAQKETTADFSPVPPLQEQPERLVVVSGVTKTDLLIGSQESHPPVETVPLIQDSGFELVTGKIQDKNCAGSKKEDDMNWCKEEKITSVRTCLPEKVE-VDSLKYDIIQKSTAACLSLTDVSSATRSDLPELHSSLTVQDSDISRLIDQVSLENESEMDSAVSALIGQLDGTDDQVNLSTSPSIPGAGSQTFGAVAAHTLTAELSTPHQDGFVTTKPR	ANSDGDKNEKETNLKESVFTCSEKTADISNLASPLKKESALKETTADFSLLPPPQEQPERLVAVSGVTETNHL------NLPVDTVPLIQSSGFERDTEKIQGKNCAGTKREGDTNRCKEEKITPVRTCLPEKVEEVENLKYGIIQKSTVACLSLTDISSAVCSDAPDLRSSLTVQDSDISRLIDEVSLVTESELDSAVSALIGQLDVTDDQTS-PTTPMLPGAGSQTLGAVATRALTAELSTPCKNDFITTKSG	ANSDG N KET LKES+ CSE+TA+ISNLASPL+KESA KETTADFS +PP QEQPERLV VSGVT+T+ L + PV+TVPLIQ SGFE T KIQ KNCAG+K+E D N CKEEKIT VRTCLPEKVE V++LKY IIQKST ACLSLTD+SSA SD P+L SSLTVQDSDISRLID+VSL ESE+DSAVSALIGQLD TDDQ + T+P +PGAGSQT GAVA LTAELSTP ++ F+TTK
38707	Query_108	19-contig_2766_1	1723	gi|326926428|ref|XP_003209402.1|PREDICTED: pseudopodium-enriched atypical kinase 1-like [Meleagris gallopavo]	XP_003209402	1664	1	669.848	1727	0	316	702	1269	1650	0	0	351	363	5	387	SYVVSVVFIFFPQICKSKAKESQQYYHSLSIRQSLAINFNIQQDCGHFLAEVPVRLLPWEDTDAPEVDEEQEEEQEPELKNGGTPSNTEALQKDSSSNQGTISKPRSRVVVITREVPYLTVADFVRESAPRHAKSPDLYERQVCLLLLQLCLGLEHLKPYHITHCDLRLENLLLVHSRPGGSPLSSESVEPSPNTACPARLIVSNFSQAKQKSHMVDPEVLRDQSRLAPEIITATQYKKCDEFQTGILIYEMLHL	SYAKDPLNNYAVKICKSKAKESQQYYHSLSIRQSLAINFNIQQDCGHFLAEVPVRLLPWEDTDAPEVEEEQEEEEEPEQKNRGTPSNTEASQKDSSSNQGTINKPRSRVVVITREVPYLTVADFVRESAPRHAKSPDLYERQVCLLLLQLCLGLEHLKPYHITHCDLRLENLLLVHSRPGGSPLSSESAEPSPNTACPARLIVSNFSQAKQKSHMVDPEVLRDQSRLAPEIITATQYKKCDEFQTGILIYEMLHL	SY + + +ICKSKAKESQQYYHSLSIRQSLAINFNIQQDCGHFLAEVPVRLLPWEDTDAPEV+EEQEEE+EPE KN GTPSNTEA QKDSSSNQGTI+KPRSRVVVITREVPYLTVADFVRESAPRHAKSPDLYERQVCLLLLQLCLGLEHLKPYHITHCDLRLENLLLVHSRPGGSPLSSES EPSPNTACPARLIVSNFSQAKQKSHMVDPEVLRDQSRLAPEIITATQYKKCDEFQTGILIYEMLHL
116475	Query_1055	3-contig_56297_1	893	gi|326926583|ref|XP_003209478.1|PREDICTED: cell cycle progression protein 1-like [Meleagris gallopavo]	XP_003209478	800	1	690.649	1781	0	352	753	272	671	0	0	364	380	2	402	ISSLRGDLATCLTSTEVEKKSFESQKKSLAAENQHLRESLEKEEKALVSLQEELRKLRQQIRNLEDKGTSTESIVMENQKLREHLEEEKQRNHNFRRQKETLFAEAQMLRRELDKERHITEALKKELEQLSSRQTPDSVSDDDTLRENQEIETLRGRLAELEKKLNFEQQRSDLWEKLYVEAKDQNEKQEMNEKGQKRGAKGQSKSKKKSKESFFGSVKETFDVMKNSAKEFVRHHKEKIKQAKEAVKEKLKKFS	VGSLKGDLATCLTSTEVEKKSFESQKKSLAAENQHLRESLEKEEKSLVSLQEELRKLRQQIRNLEDKGTSTESIVMENQKLREHLEEEKQRNHNFRRQKETLFAEAQMLRRELDKERHITESLKKELEQLSSRQTPDSVNDDDTLRENQEIETLRGRLVELEKKLNFEQQRSDLWEKLYVEVKDQTEKQEMNEKGQKRGAKGQSKSKKKSKESFFGSVKETFDVMKNSAKEFVRHHKEKIKQAKEAVKEKLKKFS	+ SL+GDLATCLTSTEVEKKSFESQKKSLAAENQHLRESLEKEEK+LVSLQEELRKLRQQIRNLEDKGTSTESIVMENQKLREHLEEEKQRNHNFRRQKETLFAEAQMLRRELDKERHITE+LKKELEQLSSRQTPDSV+DDDTLRENQEIETLRGRL ELEKKLNFEQQRSDLWEKLYVE KDQ EKQEMNEKGQKRGAKGQSKSKKKSKESFFGSVKETFDVMKNSAKEFVRHHKEKIKQAKEAVKEKLKKFS
307413	Query_577	7-contig_42157_1	726	gi|326926599|ref|XP_003209486.1|PREDICTED: uncharacterized protein KIAA1370 homolog [Meleagris gallopavo]	XP_003209486	1093	1	1139.02	2945	0	56	707	150	798	0	0	561	594	5	653	SVVFVSSSYALQSVAVAVFSSIKGLLLRYVCILYCFRVSAADVDLQWTFSQTPTEHVFPVPNVSHSVALKVSVQSLPRQSNYPVLTCSIHTNLGYYEKQMRERKLHHRSESSAAELCSTSSLQRVCGKQTWTMTPEGLLNVKKTPEFTSSIRNLKLYPSTGLGSDFAASQSKVQCYNAAADSKTQSHETSVRAFKSLSLIDSRVSNGHCSHQPTGESNPLIGSLLQERQEVIARIAQHLIHCDPATSPVVAGRPF	TLLLAVRSFVFFSQLSAWLSVSHGAVPRN--ILY--RVSAADVDLQWTFSQTPTEHVFPVPNVSHNVALKVSVQSLPRQSNYPVLTCSIHTNLNYYEKQMKERKLHQHGESSTAELCSTSSPQRVCGKQAWTVIPEGLLNVRKTPEFTSSIRNLKLYPSTGLGSDFAASQSKVQCYNAAADSKTQSHETAVRTFKSLSLVDSRVSNGHCSHQSTGETNPLIGSLLQERQEVIARIAQHLIHCDPATSPVVAGRPF	+++ S+ S A S G + R ILY RVSAADVDLQWTFSQTPTEHVFPVPNVSH+VALKVSVQSLPRQSNYPVLTCSIHTNL YYEKQM+ERKLH ESS AELCSTSS QRVCGKQ WT+ PEGLLNV+KTPEFTSSIRNLKLYPSTGLGSDFAASQSKVQCYNAAADSKTQSHET+VR FKSLSL+DSRVSNGHCSHQ TGE+NPLIGSLLQERQEVIARIAQHLIHCDPATSPVVAGRPF
77367	Query_100	33-contig_4547_1	462	gi|326926601|ref|XP_003209487.1|PREDICTED: mitogen-activated protein kinase 6-like [Meleagris gallopavo]	XP_003209487	721	1	686.797	1771	0	38	439	289	687	0	0	342	357	3	402	ALSFLEELCRWSELLYVILDLNLSDSNLEEVPDLIDEKLVSSVLNCHDSVREFLNVTVSKTLLTLRKLFCRYHESQFSDHDWPIHNNYEADEVQRDPRALSDVTDEEEVQVDPRKYLDGDREKYLEDPAFDTHFSTEPCWQYSDHHENKYCDLECSHTCNYKMRSSSYLDNLVWRDSEVNHYYEPKLIIDLSNWKEQSKEKSDKKGKSKCEKNGLVKAQIALEEASQQLVEKEREKNQGFDFDSFIAETIQLSLQ	ALDFLEQILTFSPMDRLTAEEALSHPYMSIYSFPTDEPISSHPFHIEDEVDDILLMDESHSHIYN---WERYHESQFSDHDWPIHNNYEADEVQRDPRALSDVTDEEEVQVDPRKYLDGDREKYLEDPAFDTHFSTEPCWQYSDHHENKYCDLECSHTCNYKMRSSSYLDNLVWRDSEVNHYYEPKLIIDLSNWKEQSKEKSDKKGKSKCEKNGLVKAQIALEEASQQLVEKEREKNQGFDFDSFIAETIQLSLQ	AL FLE++ +S + + + LS + DE + S + D V + L + S + + + RYHESQFSDHDWPIHNNYEADEVQRDPRALSDVTDEEEVQVDPRKYLDGDREKYLEDPAFDTHFSTEPCWQYSDHHENKYCDLECSHTCNYKMRSSSYLDNLVWRDSEVNHYYEPKLIIDLSNWKEQSKEKSDKKGKSKCEKNGLVKAQIALEEASQQLVEKEREKNQGFDFDSFIAETIQLSLQ
162396	Query_749	27-contig_5814_1	997	gi|326926743|ref|XP_003209557.1|PREDICTED: elongation factor Tu GTP-binding domain-containing protein 1-like [Meleagris gallopavo]	XP_003209557	1140	1	653.67	1685	0	187	595	682	1083	0	0	325	349	11	411	FAKIEISVSAPIIPFRETITRPPKVDMVNEEIGKQQKVAVIHQAKEDQNKIPEGIQVDSDGLVTISTPNKHATISVRALPLPEEVTRLLEENSDLIRTMEQLSTSLNEDKKAHEINQKTIDKIKEFKQKLEQNLQGRKWRNAVDHIWSFGPRKCGPNVLLHKFEGYKNSVWQCLGNAEKEVSKYGDFDNSIVSGFQLATLSGPMCEEPLMGVCFTVEKLEISKAGETLSTKSQDSGECGAVEHKESEDAVSPASN	FAKIEISVSAPIIPFRETITRPPKVDMVNEEIGKQQKVAVIHQTKEDQNRIPEGIQVDSDGLVTISTPNKQATLSVRALPLPEEVTRLLEENSDLIRTMEQLSTSLNEDKKAHEIDQKTVDKIKEFKQKLEQNLQGRKWRNAVDHIWSFGPRKCGPNILLHKFEGYKNSVWQCLENAEKEVSKYGDFDNSIVSGFQLATLSGPMCEEPLMGVCFTVEKWEMNKAGETLPTKSQDSGECGAVEHKESEDTVSPTSN	FAKIEISVSAPIIPFRETITRPPKVDMVNEEIGKQQKVAVIHQ KEDQN+IPEGIQVDSDGLVTISTPNK AT+SVRALPLPEEVTRLLEENSDLIRTMEQLSTSLNEDKKAHEI+QKT+DKIKEFKQKLEQNLQGRKWRNAVDHIWSFGPRKCGPN+LLHKFEGYKNSVWQCL NAEKEVSKYGDFDNSIVSGFQLATLSGPMCEEPLMGVCFTVEK E++KAGETL TKSQDSGECGAVEHKESED VSP SN
63310	Query_190	19-contig_4475_1	530	gi|326926831|ref|XP_003209600.1|PREDICTED: chondroitin sulfate synthase 1-like [Meleagris gallopavo]	XP_003209600	707	1	1095.11	2831	0	1	527	178	704	0	0	522	526	0	527	MQQLFYENYEQNKKGYIRDLRNSKIHRAITLHPNKNPPYQYRLHSYMLSRKIAELRHRTVQLHREIVLMSKYSNTEVHKEDLQLGMPPSFMRFQPRHREEILEWEFLTGKYLYSGADGQPPRRGMDSSQREALDDIVMQVMEMINANAKTRGRIIDFKEIQYGYRRVNPMYGAEYVLDLLLLYKKHKGKKMTVPVRRHAYLQQTFSKIQFMEHEEMDAKELASKINQDSGSLSFLSNSLKMFVPFQLSRSRVERK	MQQLFYENYEQNKKGYIRDLRNSKIHRAITLHPNKNPPYQYRLHSYMLTRKIAELRHRTVQLHREIVLMSKYSNTEVHKEDLQLGMPPSFMRFQPRHREEILEWEFLTGKYLYSGADGQPPRRGMDSSQREALDDIVMQVMEMINANAKTRGRIIDFKEIQYGYRRVNPMYGAEYVLDLLLLYKKHKGKKMTVPVRRHAYLQQTFSKIQFMEHEEMDAKELASKINQDSGSLSFLSNSLKMFVPFQLSRSRVERK	MQQLFYENYEQNKKGYIRDLRNSKIHRAITLHPNKNPPYQYRLHSYML+RKIAELRHRTVQLHREIVLMSKYSNTEVHKEDLQLGMPPSFMRFQPRHREEILEWEFLTGKYLYSGADGQPPRRGMDSSQREALDDIVMQVMEMINANAKTRGRIIDFKEIQYGYRRVNPMYGAEYVLDLLLLYKKHKGKKMTVPVRRHAYLQQTFSKIQFMEHEEMDAKELASKINQDSGSLSFLSNSLKMFVPFQLSRSRVERK
243974	Query_14	1-contig_34293_1	538	gi|326926837|ref|XP_003209603.1|PREDICTED: pleckstrin homology domain-containing family O member 2-like [Meleagris gallopavo]	XP_003209603	572	1	743.421	1918	0	82	537	110	572	0	0	406	426	7	463	WVARLDE-------QRLEQVKVDESLSLDHVTRDRVKVAHGRRPPTRSHLKEAARSTSDGILRLDLDIVDNGPPNFDSAISENDNPPPQKETPKPPMPPTKPSGTKESHDTENSVPDQERKMSPPLPPDKKLKEGLASKDNADAKGEDCVSREENVEESSAPGEESRDHLVEINNKGTAKAPIPLPKSASDKLKVAWDQPILEPKNAKDLELLGDSSKDSPAAIAAADVAKPPVPPPKVLSEKMIATMNSSHGEL	WIKALNEGINRGKNKIFDEVKVDESLSLDHVTRDRVKVAHGRRPPTRSHLKEAAKSTSDGILRLDLDIVDNGPPNFDSTVSENDNPPPQKETPKPPMPPTKPSGTKENHDAENSVPDQEQKMSPPLPPNKKLKEGLASKENANATEEDCVSKEENVEESSTPGEENRDQLVEISNKGTAKAPIPLPKTMPDKLKVAWDQSVLEPKNAKDLELSGDSGKDSLAAIATSDVAKPPVPPPKVLSEKMIATMNSSHSDL	W+ L+E + ++VKVDESLSLDHVTRDRVKVAHGRRPPTRSHLKEAA+STSDGILRLDLDIVDNGPPNFDS +SENDNPPPQKETPKPPMPPTKPSGTKE+HD ENSVPDQE+KMSPPLPP+KKLKEGLASK+NA+A EDCVS+EENVEESS PGEE+RD LVEI+NKGTAKAPIPLPK+ DKLKVAWDQ +LEPKNAKDLEL GDS KDS AAIA +DVAKPPVPPPKVLSEKMIATMNSSH +L
194095	Query_298	2-contig_6888_1	729	gi|326927215|ref|XP_003209788.1|PREDICTED: transcriptional repressor CTCF-like [Meleagris gallopavo]	XP_003209788	728	1	1514.59	3920	0	1	728	1	728	0	0	728	728	0	728	MEGEAVEAIVEESETFIKGKERKTYQRRREGGQEDEACHIAPNQADGGEVVQDVNSGVQMVMMEQLDPTLLQMKTEVMEGAVPQETEATVDDTQIITLQVVNMEEQPINLGELQLVQVPVPVTVPVATTSVEELQGAYENEVSKGGLQEGEPMICHTLPLPEGFQVVKVGANGEVETLEQGELQPQEDPNWQKDPDYQPPAKKTKKNKKSKLRYTEEGKDVDVSVYDFEEEQQEGLLSEVNAEKVVGNMKPPKPT	MEGEAVEAIVEESETFIKGKERKTYQRRREGGQEDEACHIAPNQADGGEVVQDVNSGVQMVMMEQLDPTLLQMKTEVMEGAVPQETEATVDDTQIITLQVVNMEEQPINLGELQLVQVPVPVTVPVATTSVEELQGAYENEVSKGGLQEGEPMICHTLPLPEGFQVVKVGANGEVETLEQGELQPQEDPNWQKDPDYQPPAKKTKKNKKSKLRYTEEGKDVDVSVYDFEEEQQEGLLSEVNAEKVVGNMKPPKPT	MEGEAVEAIVEESETFIKGKERKTYQRRREGGQEDEACHIAPNQADGGEVVQDVNSGVQMVMMEQLDPTLLQMKTEVMEGAVPQETEATVDDTQIITLQVVNMEEQPINLGELQLVQVPVPVTVPVATTSVEELQGAYENEVSKGGLQEGEPMICHTLPLPEGFQVVKVGANGEVETLEQGELQPQEDPNWQKDPDYQPPAKKTKKNKKSKLRYTEEGKDVDVSVYDFEEEQQEGLLSEVNAEKVVGNMKPPKPT
395636	Query_863	6-contig_17887_1	845	gi|326927501|ref|XP_003209931.1|PREDICTED: LOW QUALITY PROTEIN: genetic suppressor element 1-like [Meleagris gallopavo]	XP_003209931	1170	1	1234.17	3192	0	66	839	403	1111	0	0	682	691	65	774	LSMVKAMESPFLPVAELHALRGHPAEERGKLPEPGRAGNVPKDSTGAGPRSPPDEKLKDSVLPTPKPLQHPLHPPPASHHAVPSLIPNHNVFPLPGSSAATALLIHRTNEEEKWLARQRRLRQEKEDRQSQVSEFRQQVLEQHLDMGRTPSQPEPEHRPDNPRGLARLIESNKERIAGRHNGKCLLQQPGIVRSSLPQSGEERPRSGPSRHEPSIREPGQHFGGPPPLISPKPQHHPIATSLWNPVSLMESPSEP	LSMVKAMESPFLPVAELHALRGHPAEERSKLPEPSRA-----------------EKLKDSVLPTPKPLQHPLHPPPTSHHPVPSLIPNHNVFPLPGSSAATALLIHRTNEEEKWLARQRRLRQEKEDRQSQVSEFRQQVLEQHLDMGRTPSQPEPEHRPDNPR------------------------------------------SGPSRHEPSIREPGQHFGGPPPLISPKPQHHPITTSLWNPVSLMESSSEP	LSMVKAMESPFLPVAELHALRGHPAEER KLPEP RA EKLKDSVLPTPKPLQHPLHPPP SHH VPSLIPNHNVFPLPGSSAATALLIHRTNEEEKWLARQRRLRQEKEDRQSQVSEFRQQVLEQHLDMGRTPSQPEPEHRPDNPR SGPSRHEPSIREPGQHFGGPPPLISPKPQHHPI TSLWNPVSLMES SEP
138104	Query_961	16-contig_4779_1	974	gi|326927618|ref|XP_003209988.1|PREDICTED: carbohydrate sulfotransferase 4-like [Meleagris gallopavo]	XP_003209988	377	1	705.286	1819	0	414	785	1	371	0	0	338	354	1	372	MMKSRRVQMLLILAVLSFLLIHFHFPTCSNTTSLELKSSPVHILILSSWRSGSSFTGQLFSQHPNVFYLMEPAWHVWVTMYQNSAKVLHMAVRDLVRSVFLCDMSVFDAYMSSQKKKSDLFKWEASRALCSPPACDFFSRNDIITAGHCRTVCGKYSFSKVEEACKTYSHVVIKEVRFFDLKVLYPLLTDPSLNLKIIHLVRDPRAVFRSRENSMAHLKRDSNIVVGSQKMEGEMGPYNTMQEICKSHVEIYKAG	MMKPR-MQMLLILAVLFVLLFHFHFLTCSNSASLELKSSPVHILILSSWRSGSSFTGQLFSQHPSVFYLMEPAWHVWVTMYQNSAKVLHMAVRDLVRSVFLCDMSVFDAYMSSQKKKSDLFQWEKSRALCSPPACDFFSRNDIIAAGNCRTLCGRYSFSKVEEACKTYSHVVIKEVRFFDLKVLYPLLTDPSLNLKIIHLVRDPRAVFRSRENTMAELKRDSDIVVGSQKTKGELGPYNTMQEICKSHVEIYKAG	MMK R +QMLLILAVL LL HFHF TCSN+ SLELKSSPVHILILSSWRSGSSFTGQLFSQHP+VFYLMEPAWHVWVTMYQNSAKVLHMAVRDLVRSVFLCDMSVFDAYMSSQKKKSDLF+WE SRALCSPPACDFFSRNDII AG+CRT+CG+YSFSKVEEACKTYSHVVIKEVRFFDLKVLYPLLTDPSLNLKIIHLVRDPRAVFRSREN+MA LKRDS+IVVGSQK +GE+GPYNTMQEICKSHVEIYKAG
246518	Query_783	11-contig_11219_1	1032	gi|326927702|ref|XP_003210030.1|PREDICTED: protocadherin gamma-C5-like, partial [Meleagris gallopavo]	XP_003210030	923	1	1544.25	3997	0	25	811	1	787	0	0	753	770	0	787	GRAQLRYSVPEDREPGAPVGDVAKDLGVEVRSLAARNLRLVSESEQRHFQVDLAAGVLLLDRRLDREALCGQSPTCSLHLQLVMENPLQLHRVEVEVLDVNDNAPQFPKPEVVLEITEVANPGTRLPLEVAEDPDMGSNSISTYELSPSEHFGLSINVRGDGVKMPEIVLKKALDREKVAVHHLTLTALDGGNPVKSGTAKVTIRVLDANDNPPVCNPPISKVYLEENMPVGTLVTKLNVTDLDEGPNGDVEYSF	GSAQLRYSVPEDREPGTPVGDVAKDLGVEVRSLAARNLRLVSESEQRHFQLDLAAGVLLLDRRLDRETLCGQSPACSLHLQLVMENPLQLHRVEVDVLDVNDNAPQFPKPEVVLEITEVANPGTRLPLEVAEDPDMGSNSISTYELSPSEHFGLSINVRGDGVKMPEIVLKKALDREKLAVHHLTLTALDGGNPVKSGTAKVTIHVLDANDNPPVCDPPVSKVYLEENVPVGTLVTKLNVTDLDEGPNGDVEYSF	G AQLRYSVPEDREPG PVGDVAKDLGVEVRSLAARNLRLVSESEQRHFQ+DLAAGVLLLDRRLDRE LCGQSP CSLHLQLVMENPLQLHRVEV+VLDVNDNAPQFPKPEVVLEITEVANPGTRLPLEVAEDPDMGSNSISTYELSPSEHFGLSINVRGDGVKMPEIVLKKALDREK+AVHHLTLTALDGGNPVKSGTAKVTI VLDANDNPPVC+PP+SKVYLEEN+PVGTLVTKLNVTDLDEGPNGDVEYSF
317358	Query_383	10-contig_11219_1	867	gi|326927704|ref|XP_003210031.1|PREDICTED: protocadherin gamma-C5-like, partial [Meleagris gallopavo]	XP_003210031	541	1	1089.33	2816	0	65	605	1	541	0	0	534	537	0	541	VLSDSDSQYFSVNVNTGVIMVSERIDREQLCGQNPRCFLHLKLAIENPVEFYRIEVEILDINDNSPEFPSDEVSLRIYELASLGARFPIQPAQDPDVGTNTLQTYHLSANENFNLNVKARTDGGKFPELVLERALDRELRAFHHLVLTAEDGGSPPKSSKTHITIQVLDANDNHPVFDRPSYGARLVENSPLGTLVVKLNATDVDEGPNGDIRYSLSSHNSDALRQIFAIDEQTGEIRVQGNLDFEEATVYEIEV	VLSDSDSQYFSVNVNTGVIMVSERIDREQLCGQNPRCFLHLKLAIENPVEFYRIEVEILDINDNSPEFPSDEVSLRIYELASLGARFPIQPAQDPDVGTNTLQTYHLSANENFNLNVKARTDGGKFPELVLERALDREHRAFHHLVLTAEDGGSPPKSSKTHITIQVLDANDNHPVFDRPSYGARLVENSPLGTLVVKLNATDVDEGPNGDIRYSLSSHNSDALRQIFAIDEQTGEIRVQGNLDFEEATVYEIEV	VLSDSDSQYFSVNVNTGVIMVSERIDREQLCGQNPRCFLHLKLAIENPVEFYRIEVEILDINDNSPEFPSDEVSLRIYELASLGARFPIQPAQDPDVGTNTLQTYHLSANENFNLNVKARTDGGKFPELVLERALDRE RAFHHLVLTAEDGGSPPKSSKTHITIQVLDANDNHPVFDRPSYGARLVENSPLGTLVVKLNATDVDEGPNGDIRYSLSSHNSDALRQIFAIDEQTGEIRVQGNLDFEEATVYEIEV
2972	Query_784	9-contig_11219_1	805	gi|326927706|ref|XP_003210032.1|PREDICTED: protocadherin gamma-C5-like, partial [Meleagris gallopavo]	XP_003210032	794	1	1279.23	3309	0	5	728	1	794	0	0	668	689	72	795	MESVSLQRPAWKWQVLSLFSLCGWGWVSGQIRYSVLEESEVGTAVGNVAQDLGLKVEQLAGRRLRLGSEESRQHFAVRLDSGVLVVSERLDRERLCGAAASCVLSVQVVAENPLQLFRLEVEILDLNDNSPSFPTAHRSLRIAESAAVATRFPLESAQDPDVGTNAVSSYRLNPNSHFSLDVKQLQDGKLFPELVLERTLDREEQPELQLVLTAVDGGSPARSGTAQITVQVLDINDNAPAFDRATYKVRILENT	MESVSLQRPAWKWQVLSLFSLCGWGWVSGQIRYSVLEESEVGTAVGNVAQDLGLKVEQLAGRRLRLGSEESRQHFAVRLDSGVLVVSERLDRERLCGAASSCVLSVQVVAENPLQLFRLEVEILDLNDNSPSFPTARRSLRIAESAAVATRFPLESAQDPDVGTNAVGSYRLNPNSHFSLDVKQLQDGKLFPELVLERALDREERPELQLVLTAVDGGSPARSGTAQITVQVLDINDNAPAFDRATYKVQIPENT	MESVSLQRPAWKWQVLSLFSLCGWGWVSGQIRYSVLEESEVGTAVGNVAQDLGLKVEQLAGRRLRLGSEESRQHFAVRLDSGVLVVSERLDRERLCGAA+SCVLSVQVVAENPLQLFRLEVEILDLNDNSPSFPTA RSLRIAESAAVATRFPLESAQDPDVGTNAV SYRLNPNSHFSLDVKQLQDGKLFPELVLER LDREE+PELQLVLTAVDGGSPARSGTAQITVQVLDINDNAPAFDRATYKV+I ENT
324800	Query_440	4-contig_11219_1	814	gi|326927708|ref|XP_003210033.1|PREDICTED: protocadherin gamma-C3-like [Meleagris gallopavo]	XP_003210033	813	1	1583.16	4098	0	1	812	1	812	0	0	795	799	0	812	MKGVAARSRGVTPGQVLSLCLLLAASSGASAAIRYAIPEEARRGSAVGNVAADLALDPARLSGRRPRVVSGGSKKYFAVDAASGSLLVSERIDREELCGALSPCTLSFEIVLENPLELYSGAVEIQDINDNDPVFPSSQARLEISESVAAGTRFPLESAQDPDVGINSLQTYQLSANPHFVLDVQTRADGSKYAELVLEKELDREEQRELHLVLTALDGGSPPRSAHVQIHIDVVDSNDNAPVFNQSTYKASVRE	MKGVAARSRGVTPGQLLSLCLLLAASSGASAAIRYAIPEEARRGSAVGNVAADLALDPARLSGRRPRVVSGGSKKYFAVDAASGSLLVSERIDREELCGALSPCTLSFEIVLEKPLELYSGAVEIQDINDNDPVFPSSQARLEISESVAAGTRFPLESAQDPDVGINSLQTYQLSANPHFVLDVQTRVDGSKYAELVLEKELDREEQRELHLVLTALDGGSPPRSAHVQIHIDVVDSNDNAPVFNQSTYKASVRE	MKGVAARSRGVTPGQ+LSLCLLLAASSGASAAIRYAIPEEARRGSAVGNVAADLALDPARLSGRRPRVVSGGSKKYFAVDAASGSLLVSERIDREELCGALSPCTLSFEIVLE PLELYSGAVEIQDINDNDPVFPSSQARLEISESVAAGTRFPLESAQDPDVGINSLQTYQLSANPHFVLDVQTR DGSKYAELVLEKELDREEQRELHLVLTALDGGSPPRSAHVQIHIDVVDSNDNAPVFNQSTYKASVRE
304642	Query_1090	4-contig_7154_1	557	gi|326927748|ref|XP_003210052.1|PREDICTED: 5-aminolevulinate synthase, nonspecific, mitochondrial-like [Meleagris gallopavo]	XP_003210052	635	1	693.345	1788	0	140	531	67	455	0	0	369	375	3	392	EVKNAKEVSQKSTDGPQPPAGHPPAAAGQSSATKCPFLAAQMNHKSSNVFCKASLELQEDVKEMQADRKGKEFAKIPTNSVGRNTESEGEEQSGLLKKFKDIMLKQRPESVSHLLQDNLPKSVSTFQYDQFFERKIDEKKKDHTYRVFKTVNRKAQIFPMADDYSDSLITKKEVSVWCSNDYLGMSRHPRVCGAVMDTLKQHGAGAGGTRNISGTSKFHVDLEKELADLHGKDAALLFSSCFVANDSTLFTLAKM	EAKNAKEVAQQNTDGSQPPADHPPAAAGQSSATKCPFLAAQMNHKSSNVFCKASLELQEDVKEMQVDRQGKEFAKIPTNSVVRNTESEGEEQSGLLKKFKDIMLKQRPESVSHLLQDNLPKSVSTFQYDQFFEKKIDEKKKDHTYRVFKTVNRKAQIFPMADDYSDSLITKKEVSVWCSNDYLGMSRHPRVCGAVMDTLKQHGAGAGGTRNISGTSKFHVDLEKELADLHGKDAALLFSSCFVANDSTLFTLAKM	E KNAKEV+Q++TDG QPPA HPPAAAGQSSATKCPFLAAQMNHKSSNVFCKASLELQEDVKEMQ DR+GKEFAKIPTNSV RNTESEGEEQSGLLKKFKDIMLKQRPESVSHLLQDNLPKSVSTFQYDQFFE+KIDEKKKDHTYRVFKTVNRKAQIFPMADDYSDSLITKKEVSVWCSNDYLGMSRHPRVCGAVMDTLKQHGAGAGGTRNISGTSKFHVDLEKELADLHGKDAALLFSSCFVANDSTLFTLAKM
145030	Query_633	4-contig_16784_1	525	gi|326927884|ref|XP_003210118.1|PREDICTED: voltage-dependent L-type calcium channel subunit alpha-1D-like [Meleagris gallopavo]	XP_003210118	2201	1	987.252	2551	0	13	524	1681	2201	0	0	502	506	9	521	RAGLRTLHDIGPEIRRAISCDLQDDEPEENNPDEEEEVYKRNGALFGNHINHISSDRRDSFQQINTTHRPLHVQRPSIPSASDTEKNIYPQTGNSVYHNHHNHNSVGKQVPNSTNANLNNANVSKVVHGKHTNFGSHERRSENSYHSYSRADHEKRRRPSSR---------RSDSGDGRRPTICREERDVRDYCNDDHYLGEQDYYSGEEYYEEDSMLSGSRHVYDYHCRHHCHDSDFERPKGYHHPHGFFEEDD	QAGLRTLHDIGPEIRRAISCDLQDDEPEENNPDEEEEVYKRNGALFGNHINHISSDRRDSFQQINTTHRPLHVQRPSIPSASDPEKNVYPQTGNSVYHNHHNHNSVGKQVPNSTNANLNNANVSKVVHGKHANFGSHEHRSENGYHSYSRADHEKRRRPSSRRTRYYETYIRSDSGDGRRPTICREERDIRDYCNDDHYLGEQDYYSGEEYYEEDSMLSGSRHVYDYHCRHHCHDSDFERPKGYHHPHGFFEEDD	+AGLRTLHDIGPEIRRAISCDLQDDEPEENNPDEEEEVYKRNGALFGNHINHISSDRRDSFQQINTTHRPLHVQRPSIPSASD EKN+YPQTGNSVYHNHHNHNSVGKQVPNSTNANLNNANVSKVVHGKH NFGSHE RSEN YHSYSRADHEKRRRPSSR RSDSGDGRRPTICREERD+RDYCNDDHYLGEQDYYSGEEYYEEDSMLSGSRHVYDYHCRHHCHDSDFERPKGYHHPHGFFEEDD
241463	Query_61	3-contig_6094_1	1043	gi|326928196|ref|XP_003210267.1|PREDICTED: cullin-associated NEDD8-dissociated protein 1-like [Meleagris gallopavo]	XP_003210267	1217	1	976.082	2522	0	318	827	460	969	0	0	484	497	0	510	GIVFSLAEKSNSSNMRIDALSFLHVLLCNHQPEVFHPHIKSLLPPVVACIGDPFYKITSEALLVAQQLVKVIRPLDKPCAFDAKPYMKDLFPGTLKRLKAADIDQEVKERAISCMGQIIYSLGDHLSSDLQPTLKIFLERLKNEITRLTTVKALTLIASSPLKIDLRPILGEGFPILASFLRKNQRALKLSTLAALDVLVKNYSDSLKPAMIESVLTELPALISENDMHVSQVAIAFLTTLAKLHPSCISKITGS	GIVFSLADKSNSSNMRIDALSFLHVLLCNHQPEAFHPHIKSLLPPVVACIGDPFYKITSEALLVAQQLVKVIRPLDKPCTFDAKPYVKDLFPGTLKRLKAADIDQEVKERAISCMGQIIYSLGDHLSTDLQPTLKIFLERLKNEITRLTAVKALTLIASSPLKIDLRPILGEGFPILASFLRKNQRALKLSTLAALDILVKNYSDSLKPAMIESVLTELPALISENDMHVSQVAIAFLTTLAKVYPSCISKITGS	GIVFSLA+KSNSSNMRIDALSFLHVLLCNHQPE FHPHIKSLLPPVVACIGDPFYKITSEALLVAQQLVKVIRPLDKPC FDAKPY+KDLFPGTLKRLKAADIDQEVKERAISCMGQIIYSLGDHLS+DLQPTLKIFLERLKNEITRLT VKALTLIASSPLKIDLRPILGEGFPILASFLRKNQRALKLSTLAALD+LVKNYSDSLKPAMIESVLTELPALISENDMHVSQVAIAFLTTLAK++PSCISKITGS
345077	Query_583	1-contig_21366_1	627	gi|326928269|ref|XP_003210303.1|PREDICTED: stress-70 protein, mitochondrial-like [Meleagris gallopavo]	XP_003210303	727	1	913.294	2359	0	43	504	247	708	0	0	453	455	0	462	VDAFIIQSSLTATKDAGQISGLNVLRVINEPTAAALAYGLDKSEDKIIAVYDLGGGTFDISILEIQKGVFEVKSTNGDTFLGGEDFDQALLQYIVKEFKRETGVDLTKDNMALQRVREASEKAKCELSSSVQTDINLPYLTMDASGPKHLNMKLSRSQFEGIVADLIKRTVAPCQKAMQDAEVSKSDIGEVILVGGMTRMPKVQQTVQDLFGRAPSKAVNPDEAVAIGAAIQGGVLAGDVTDVLLLDVTPLSLGI	VPAYFNDSQRQATKDAGQISGLNVLRVINEPTAAALAYGLDKSEDKIIAVYDLGGGTFDISILEIQKGVFEVKSTNGDTFLGGEDFDQALLQYIVKEFKRETGVDLTKDNMALQRVREASEKAKCELSSSVQTDINLPYLTMDASGPKHLNMKLSRSQFEGIVADLIKRTVAPCQKAMQDAEVSKSDIGEVILVGGMTRMPKVQQTVQDLFGRAPSKAVNPDEAVAIGAAIQGGVLAGDVTDVLLLDVTPLSLGI	V A+ S ATKDAGQISGLNVLRVINEPTAAALAYGLDKSEDKIIAVYDLGGGTFDISILEIQKGVFEVKSTNGDTFLGGEDFDQALLQYIVKEFKRETGVDLTKDNMALQRVREASEKAKCELSSSVQTDINLPYLTMDASGPKHLNMKLSRSQFEGIVADLIKRTVAPCQKAMQDAEVSKSDIGEVILVGGMTRMPKVQQTVQDLFGRAPSKAVNPDEAVAIGAAIQGGVLAGDVTDVLLLDVTPLSLGI
13407	Query_87	1-contig_13847_1	611	gi|326928307|ref|XP_003210322.1|PREDICTED: protein KIBRA-like [Meleagris gallopavo]	XP_003210322	1117	1	827.009	2135	0	40	610	527	1117	0	0	472	490	104	633	RGSLATSSQDSSTSASFTDLYCEHMEQLEQLDSDYQNKIDLLLEGATGFRPSGCITTIHENEVAKTHKADATSRIQALRSLSGTPKSMTSLSPRSSLSSPSPPCSPLVIDPLLTGDAFSSHMDFDDTEEISTNLSELTLNIGNGNGRLEEPRAGDKHLSQEITESN--------------------------------CMTSSELTKCDDTEAVGTAKVQIAMR-----------------------------NI	RGSLATSSQDSSTSASFTDLYCEHMEQLEQLDSDYQNKIDLLLEGATGFRPSGCITTIHENEVAKTHKADATSRIQALRSLSGTPKSMTSLSPRSSLSSPSPPCSPLVIDPLLTGDAFSSHMDFDDTE-ISTNLSELTLNIGSGNCRLEEPRAGDKHLGQGVNAAGGTALKVACVSAAVSDESVAGDSGVYEASVQRPCASEVMVFDNDDTEAVRTAKVQIAMRYDEKNKQFAILVIQLSNVQALLLQQDQKVNI	RGSLATSSQDSSTSASFTDLYCEHMEQLEQLDSDYQNKIDLLLEGATGFRPSGCITTIHENEVAKTHKADATSRIQALRSLSGTPKSMTSLSPRSSLSSPSPPCSPLVIDPLLTGDAFSSHMDFDDTE ISTNLSELTLNIG+GN RLEEPRAGDKHL Q + + C + + DDTEAV TAKVQIAMR NI
230015	Query_769	7-contig_1971_1	945	gi|326928490|ref|XP_003210411.1|PREDICTED: cytoplasmic FMR1-interacting protein 2-like [Meleagris gallopavo]	XP_003210411	1253	1	1836.62	4756	0	1	941	1	891	0	0	891	891	50	941	MTTHVTLEDALSNVDLLEELPLPDQQPCIEPPPSSIMYQLASIGHQANFDTNFEDRNAFVTGIARYIEQATVHSSMNEMLEEGHEYAVMLYTWRSCSRAIPQVKCNEQPNRVEIYEKTVEVLEPEVTKLMKFMYFQRKAIERFCSEVKRLCHAERRKDFVSEAYLLTLGKFINMFAVLDELKNMKCSVKNDHSAYKRAAQFLRKMADPQSIQESQNLSMFLANHNRITQASPFPLNQRNLPRIDRSDLAKAESIS	MTTHVTLEDALSNVDLLEELPLPDQQPCIEPPPSSIMYQ-------ANFDTNFEDRNAFVTGIARYIEQATVHSSMNEMLEEGHEYAVMLYTWRSCSRAIPQVKCNEQPNRVEIYEKTVEVLEPEVTKLMKFMYFQRKAIERFCSEVKRLCHAERRKDFVSEAYLLTLGKFINMFAVLDELKNMKCSVKNDHSAYKRAAQFLRKMADPQSIQESQNLSMFLANHNRITQ--------------------------	MTTHVTLEDALSNVDLLEELPLPDQQPCIEPPPSSIMYQ ANFDTNFEDRNAFVTGIARYIEQATVHSSMNEMLEEGHEYAVMLYTWRSCSRAIPQVKCNEQPNRVEIYEKTVEVLEPEVTKLMKFMYFQRKAIERFCSEVKRLCHAERRKDFVSEAYLLTLGKFINMFAVLDELKNMKCSVKNDHSAYKRAAQFLRKMADPQSIQESQNLSMFLANHNRITQ
368073	Query_904	12-contig_1971_1	581	gi|326928524|ref|XP_003210427.1|PREDICTED: magnesium transporter NIPA4-like [Meleagris gallopavo]	XP_003210427	401	1	704.901	1818	0	102	526	1	395	0	0	380	386	30	425	MMMEPLAANDSCSNGSLLTISCFSHRVVCQVVRGADLTDPVHNNGTGDTSWITRLESNYGFYIGLGLAVFSSFLIGSSVILKKKGLLRLVEKGGTRAGDGGHGYLKDWLWWAGLLTMGGGEAANFAAYAFAPATIVTPLGALSVLISAILSSYLLGERLNLLGKLGCMLSLVGSTVMVIHAPEEEEVTTLDEMLFKLKEPGTQEATFSPLGLGSSPHANSRLLFLSFSHPGFLAYAVVLLAVCFLLILYLAPRYG	MMMEPLETNGSCSNGSLLSISCVSHRVVCQVVRGADLADLGHDNGTGDTSWVTRLESNYGFYIGLGLAVFSSFLIGSSIILKKKGLLRLVEKGGTRAGDGGHGYLKDWLWWAGLLTMGGGEAANFAAYAFAPATIVTPLGALSVLISAILSSYLLGERLNLLGKLGCMLSLVGSTVMVIHAPEEEEVTTLDEMLFKLKE------------------------------PGFLAYAAVLLAVCFLLILYLAPRYG	MMMEPL N SCSNGSLL+ISC SHRVVCQVVRGADL D H+NGTGDTSW+TRLESNYGFYIGLGLAVFSSFLIGSS+ILKKKGLLRLVEKGGTRAGDGGHGYLKDWLWWAGLLTMGGGEAANFAAYAFAPATIVTPLGALSVLISAILSSYLLGERLNLLGKLGCMLSLVGSTVMVIHAPEEEEVTTLDEMLFKLKE PGFLAYA VLLAVCFLLILYLAPRYG
112272	Query_583	16-contig_820_1	901	gi|326928677|ref|XP_003210502.1|PREDICTED: TBC1 domain family member 9B-like [Meleagris gallopavo]	XP_003210502	1226	1	907.901	2345	0	417	892	691	1212	0	0	464	470	46	522	QVSLAILDANMEKLLQCCDEGEAMTILGRYLDNVVNRQSVSPPIPHLHALLTSGDDPPLEIDIFDLIKTSYEKFSNLKADDIEQMRFKQRLKVIQSLEDTAKKSVVRAVSGDIGFSIEELEELYVVFKAKYLMSCYWGNNRAAAARRDQSLPYLEQYRIDMEQFKELFITLTPWSCGAHTPVLAGRLFRLLDENRDSLINFKEFVTGM----------------------------------------------K	QVSLAILDANVEKLLQCCDEGEAMTILGRYLDNVVNRQSVSPPIPHLHALLTSGDDPPLEIDIFDLIKTSYEKFSNLKADDIEQMRFKQRLKVIQSLEDTAKKSVVRAVSGDIGFSIEELEELYVVFKAKYLMSCYWGNNRAAAARRDQSLPYLEQYRIDMEQFKELFITLTPWSCGAHTPVLAGRLFRLLDENRDSLINFKEFVTGMSGMYHGDLTDKLKVLYKLHLPPALNPEETESALEATSYFTEDVTTEE	QVSLAILDAN+EKLLQCCDEGEAMTILGRYLDNVVNRQSVSPPIPHLHALLTSGDDPPLEIDIFDLIKTSYEKFSNLKADDIEQMRFKQRLKVIQSLEDTAKKSVVRAVSGDIGFSIEELEELYVVFKAKYLMSCYWGNNRAAAARRDQSLPYLEQYRIDMEQFKELFITLTPWSCGAHTPVLAGRLFRLLDENRDSLINFKEFVTGM +
77757	Query_230	25-contig_820_1	609	gi|326928681|ref|XP_003210504.1|PREDICTED: alpha-1,3-mannosyl-glycoprotein 4-beta-N-acetylglucosaminyltransferase B-like [Meleagris gallopavo]	XP_003210504	521	1	866.3	2237	0	1	432	1	432	0	0	420	423	0	432	MLSLPPSGDVVDIYQREFLALRDRLHAAEQESLKRSKELNLILEEIKRAVSEKQALRDINRTWSSLSDETKLKLWNITNKNVLHLPTIFHHLPHLLSKENSLQPAVHVGQGRTGVSVVMGIPSVKREVHSYLTDTLSSLISELTQQEKEDSVIVVLIAETDTQYTAGVAENIKNLFPKEIHSGLLEVISPSPHFYPDFSHLRESFGDPKERVRWRTKQNLDYCFLMMYAQSKGIYYVQLEDDIVAKPNYLSTMKN	MLSLPSAGDVVDIYQREFLALRDRLHAAEQESLKRSKELNLVLEEIKRAVSEKQALRDINRTWSSLSDETKLKLWNITNKNVLHLPTIFHHLPHLLSKENSLQPAVHVGQGRTGVSVVMGIPSVKREVHSYLTDTLSSLISELTQQEKEDSVIVVLIAETDTQYTAGVAENIKNLFPKEIHSGLLEVISPSPHFYPDFSHLRESFGDPKERVRWRTKQNLDYCFLMMYAQSKGIYYVQLEDDIVAKPNYLSTMKN	MLSLP +GDVVDIYQREFLALRDRLHAAEQESLKRSKELNL+LEEIKRAVSEKQALRDINRTWSSLSDETKLKLWNITNKNVLHLPTIFHHLPHLLSKENSLQPAVHVGQGRTGVSVVMGIPSVKREVHSYLTDTLSSLISELTQQEKEDSVIVVLIAETDTQYTAGVAENIKNLFPKEIHSGLLEVISPSPHFYPDFSHLRESFGDPKERVRWRTKQNLDYCFLMMYAQSKGIYYVQLEDDIVAKPNYLSTMKN
313029	Query_1060	9-contig_757_1	1528	gi|326929094|ref|XP_003210706.1|PREDICTED: polycystin-1-like [Meleagris gallopavo]	XP_003210706	4258	1	2354.33	6100	0	70	1349	995	2280	0	0	1176	1205	22	1294	GDYILVVQVSNQFENLTSLTPVRIHSYLVGVQIETVKDVLVVNRSVTFRAIPLPSPYGVLYTWDFGDGSSLVTESQSTVTYSYSSRGIYNITVSANNTISSVETVECYQVFEEITGLHISADEVAEQGAAVTLNASVQTGDSITWIFDMGDGTVLRSQVPVVEHVYTKDINCTVNVTAVNPVNSVSQTVPVWIFVLEVLKIDPTSCILEHPDVQLTAYVTGNPDEYIFDWTFGDGSSNVTVSGDPVVMHNFTRSG	GDYILVVQVSNQFENLTCLTPVSVHSYLVDVQIETVKDVLVVNRSVTFRAIPLPSPYGVLYTWDFGDGSSLVTESQSTVTYSYSSRGVYNITVSANNTISSVETVECYQVFEEITGLHVSADEVAEVGATVTLNASVQTGDSITWIFDMGDGTVLRSQVPVVEHVYTKDINCTVNVTAVNPVNSVSQIVPVWIFVLEVLKIDPTSCILEHPDVQLTAYVTGNPNEYIFDWTFGDGSSNVTISGDPVVMHNFTRSG	GDYILVVQVSNQFENLT LTPV +HSYLV VQIETVKDVLVVNRSVTFRAIPLPSPYGVLYTWDFGDGSSLVTESQSTVTYSYSSRG+YNITVSANNTISSVETVECYQVFEEITGLH+SADEVAE GA VTLNASVQTGDSITWIFDMGDGTVLRSQVPVVEHVYTKDINCTVNVTAVNPVNSVSQ VPVWIFVLEVLKIDPTSCILEHPDVQLTAYVTGNP+EYIFDWTFGDGSSNVT+SGDPVVMHNFTRSG
79757	Query_107	2-contig_6323_1	660	gi|326929164|ref|XP_003210739.1|PREDICTED: transducin beta-like protein 3-like [Meleagris gallopavo]	XP_003210739	811	1	977.237	2525	0	2	659	4	811	0	0	546	580	206	836	AAGSALRFKSNYSVSRRIEPFYKGGRVQVMAASRRGWAAPRSRPGQLSALRPVLQISRDGRFMFCPCGIKLNVLDVDTGAVLHSLEQDDQEDITSFVLSPDDEVLVTGSRALLLKQWNWQENKCVRTWKAVHIAPVAAMVLDSTSTLLATGGCDSTIKIW--------------------------------------------DMIKQYCTHNLKG-------------SSGVVHSGRDKICMVWNLETRESKR	AAGSAVRFKSNYAVSRKIEPFYKGGRVQV---------------------------SRDGKFMFCPCGTKLNVIDVETGALLHSLEQDDQEDITSFVLSPDDEILVTGSRALLLKQWNWRENKCVRTWKAVHIAPVATMVFDSTSTLLATGGCDSTIKIWDMIKQYCTHNLKGSSGVVHLVEFHPDISRLQLFSSSMDYKIRIWDLNSSKCVAVLDGHFSAVTSLAFTGDGNTFISSGRDKICMVWNLKTRESKR	AAGSA+RFKSNY+VSR+IEPFYKGGRVQV SRDG+FMFCPCG KLNV+DV+TGA+LHSLEQDDQEDITSFVLSPDDE+LVTGSRALLLKQWNW+ENKCVRTWKAVHIAPVA MV DSTSTLLATGGCDSTIKIW D+ C L G + + SGRDKICMVWNL+TRESKR
243677	Query_742	90-contig_6962_1	1003	gi|326929573|ref|XP_003210935.1|PREDICTED: transmembrane protein 132C-like, partial [Meleagris gallopavo]	XP_003210935	732	1	750.355	1936	0	154	520	333	699	0	0	356	363	0	367	QEAVVSTWIQFSDSSVTPLDIYDSKDFSLSAVSLDEAVVSVHQNAALKWPVVAAEGEGQGTLVKVDMMISEACQKSKRKSILAVGNGNIRVKFGQNDADSDTGGDYDGEQIENHASDRRHKVSDQERYGQEGRYYVGSSAEREESTIRKVGTTAKSVIKNKVVKNNKLDGGKLSDDSQLQNIPIDFTNFPAQVDLPKGNTGMEENDLVQTPRGLSDLEIGMYALLGVFCLAILVFLINCATFALKYRHKQVLVEG	QEAVVSTWIQFSDSSVTPLDIYDSKDFSLSAVSLDEAVVSVHQNAALKWPVVAAEGEGQGTLVKVDMMISEACQKSKRKSILAVGNGNIKVKFGQNDADSDTGGDYDGEEIENHASDRRHKAPDQERYGQEGRYYGGSSAEREESTIRKVGTTAKSVIKNKVIKNNKLDGGKLSDDSQLQNIPIDFTNFPAQVDLPKGNAGMEENDLVQTPRGLSDLEIGMYALLGVFCLAILVFLINCATFALKYRHKQVLVEG	QEAVVSTWIQFSDSSVTPLDIYDSKDFSLSAVSLDEAVVSVHQNAALKWPVVAAEGEGQGTLVKVDMMISEACQKSKRKSILAVGNGNI+VKFGQNDADSDTGGDYDGE+IENHASDRRHK DQERYGQEGRYY GSSAEREESTIRKVGTTAKSVIKNKV+KNNKLDGGKLSDDSQLQNIPIDFTNFPAQVDLPKGN GMEENDLVQTPRGLSDLEIGMYALLGVFCLAILVFLINCATFALKYRHKQVLVEG
343745	Query_771	5-contig_6619_1	3872	gi|326929678|ref|XP_003210984.1|PREDICTED: UDP-GlcNAc:betaGal beta-1,3-N-acetylglucosaminyltransferase 4-like [Meleagris gallopavo]	XP_003210984	367	1	661.759	1706	0	3428	3772	1	346	0	0	315	327	1	346	MCPRIKSLALYAFSVTLLACLFYIRREAKLPVSPADQKVDAANPKPLVPGSAE-HKCLPDLAIANSSLALPELHRVFLTYRHCRNFSVLLKPSRCSKETFLLLAIKSAPVHVERRVAIRNTWGREVSIGGRHIRLVFLLGRSEAKAQVQPLHQLLAYESREFDDIVQWDFVDNFFNLTLKELHFLRWFTEDCLNARFVLKGDDDVFVNTYNIVEFLQELNPEQDLFVGDVIANARPIRNTKVKYFVPESMYRASF	MYPRIKSLALYAFSVMLLASLFYIRRETNLLTSPVDQKVDVADPKPLVPGNAEPSKCLPDLAVANSSLSLPELHRIFLTYRHCRNFSILLKPSRCSKETFLLLAIKSAPVNIERRVAIRNTWGKEVSIGGRRIRLVFLLGRSEARNQVQPLHQLLAYESHEFDDIVQWDFVDNFFNLTLKELHFLRWFVEDCLKASFVLKGDDDVFVNTYNIVEFLRDLKPEQDLFVGDVIANARPIRNTKVKYFVPESMYRASF	M PRIKSLALYAFSV LLA LFYIRRE L SP DQKVD A+PKPLVPG+AE KCLPDLA+ANSSL+LPELHR+FLTYRHCRNFS+LLKPSRCSKETFLLLAIKSAPV++ERRVAIRNTWG+EVSIGGR IRLVFLLGRSEA+ QVQPLHQLLAYES EFDDIVQWDFVDNFFNLTLKELHFLRWF EDCL A FVLKGDDDVFVNTYNIVEFL++L PEQDLFVGDVIANARPIRNTKVKYFVPESMYRASF
238356	Query_233	12-contig_16128_1	361	gi|326929744|ref|XP_003211016.1|PREDICTED: chemokine-like receptor 1-like [Meleagris gallopavo]	XP_003211016	360	1	687.952	1774	0	1	360	1	360	0	0	345	356	0	360	MALSNLSDYSDDSEIYDYSDYTYEEPGSVWTGPSYDPKDIARILSVVIYSVSCVLGILGNGLVIAIITLKMKRSVNAIWFLNLAVADFLFNIFLPINIAYTAMRYNWIFGTVMCKLNSFLLILNMYTSVLLLTTISFDRYVSVVFPVWSQNHRSTNLACMVCLIIWMVGIIMSCPSLVFRDTAQARNSVICFSNFSLSRNRSYQALALVRHRTVNVTRLFAGFLLPITIITFCYVSIAFNLRRNRLAKSKKPFKI	MALSNLSDYSDDSDNYDYLDYTYEEPGSVWTGPSYDPKDVARILSVIIYSVSCVLGILGNGLVIAIITLKMKKSVNAIWFLNLAVADFLFNIFLPINIAYTAMRYNWIFGTVMCKLNSFLLILNMYTSVFLLTTISFDRYVSVVFPVWSQNHRSTNLACMVCLIIWMVGIIMSCPSLVFRDTAQARNTIICFSNFSLSRNRSYQALALVRHQTVNITRLFAGFLLPLTIITFCYISIAVNLRRNRLAKSKKPFKI	MALSNLSDYSDDS+ YDY DYTYEEPGSVWTGPSYDPKD+ARILSV+IYSVSCVLGILGNGLVIAIITLKMK+SVNAIWFLNLAVADFLFNIFLPINIAYTAMRYNWIFGTVMCKLNSFLLILNMYTSV LLTTISFDRYVSVVFPVWSQNHRSTNLACMVCLIIWMVGIIMSCPSLVFRDTAQARN++ICFSNFSLSRNRSYQALALVRH+TVN+TRLFAGFLLP+TIITFCY+SIA NLRRNRLAKSKKPFKI
371246	Query_164	5-contig_16128_1	744	gi|326929748|ref|XP_003211018.1|PREDICTED: squamous cell carcinoma antigen recognized by T-cells 3-like [Meleagris gallopavo]	XP_003211018	899	1	891.338	2302	0	32	730	39	898	0	0	545	594	169	864	PPELSINAFDYNCHLDLIKLLRQEGELVKLRRARQKMSELFPLTEEIWLDWLKDEIKMASEIPEREKVYELFERAVKDYICPEIW-----------------------LEYAQYSIG------------------GIGQEGGIEKVRSIFERALTAVGLHVTKGTALWEAYRE-----------------------FENAILETAQPAPGSVPSPEQQQMLCSQLERIHTLFRRQLGIPLL--DMEASYAEYEEW	PRELSINAFDYNCHLDLIKLLRQEGELVKLRRARQKMSELFPLTEEIWLDWLKDEIKMASEISEREKVYELFERAVKDYICPEIWLEYAQYSIGGIGQEGGIEKVRSIFERALTAVGLHVTKGTALWEAYREFENAILETAQLERIHTLFRRQLGIPLLDMEASYAEYEEWSEDPIPETTIKNYKKALQQLEKCKPYEEALLGAETPKLAEYQAYIDFEMKAGDPARIQLIYERALAENCLVPDLWARYNQYLD-	P ELSINAFDYNCHLDLIKLLRQEGELVKLRRARQKMSELFPLTEEIWLDWLKDEIKMASEI EREKVYELFERAVKDYICPEIW E A ++G I + +E++ ++F R L L + A +E + E +E A+L P + +M RI ++ R L L D+ A Y +Y +
289799	Query_161	3-contig_17030_1	880	gi|326929750|ref|XP_003211019.1|PREDICTED: protein phosphatase Slingshot homolog 1-like [Meleagris gallopavo]	XP_003211019	1050	1	1620.91	4196	0	1	879	171	1050	0	0	832	851	1	880	MALVWATYYESCISSDQSCINEWNAMQDLESTRPDSPALFVDKPTERERTERLIKAKLRSIMMSKDLENVTSKEIRNELEKHMNCNLKEFKEFIDNEMLLILGQMDKPSLIFDHLYLGSEWNASNLEELQGSGIDYILNVTREIDNFFPGLFAYHNIRVYDEETTDLLAHWNEAYHFINKAKKNHSKCLVHCKMGVSRSASTVIAYAMKEFGWSLEKAYNYVKQKRSIARPNAGFMRQLLEYEGILDASKQRHNK	MALVWATYYESCISSDQSCINEWNAMQDLESTRPDSPALFVDKPTERERTERLIKAKLRSIMMSKDLENVTSKEIRNELEKHMNCNLKEFKEFIDNEMLLILGQMDKPSLIFDHLYLGSEWNASNLEELQGSGIDYILNVTREIDNFFPGLFAYHNIRVYDEETTDLLAHWNEAYHFINKAKKNHSKCLVHCKMGVSRSASTVIAYAMKEFGWSLEKAYNYVKQKRSIARPNAGFMRQLLEYEGILDASKQRHNK	MALVWATYYESCISSDQSCINEWNAMQDLESTRPDSPALFVDKPTERERTERLIKAKLRSIMMSKDLENVTSKEIRNELEKHMNCNLKEFKEFIDNEMLLILGQMDKPSLIFDHLYLGSEWNASNLEELQGSGIDYILNVTREIDNFFPGLFAYHNIRVYDEETTDLLAHWNEAYHFINKAKKNHSKCLVHCKMGVSRSASTVIAYAMKEFGWSLEKAYNYVKQKRSIARPNAGFMRQLLEYEGILDASKQRHNK
150637	Query_874	7-contig_14119_1	532	gi|326930026|ref|XP_003211154.1|PREDICTED: scavenger receptor class F member 2-like [Meleagris gallopavo]	XP_003211154	934	1	803.127	2073	0	70	531	450	934	0	0	439	446	23	485	ANQDPVAAKKPPRRLCGRFSRISMKLPRIPLRRQKMPKVVVAHHDLENTLNCSFIEPPSVVEQPSPSWSSRGSFSSFDTTDEGPVYCVPHEESVGDGRDRAPSSSPGEKLVSPASGEEAAEYSFLKETGSVKAFHADSSETPLLKSSDSERSSCGSGSASAALYARVARLSKQSKEEEETAPSPERTKPRPPDPSTKPKVSWIHSRYSSNQSNSLPSRSPETAATRPSSPEHGQGLAKRKRSPSETSAGVHGKAE	ANQDPVAAKKPPRRLCGRFSRISMKLPRIPLRRQKMPKVVVAHHDLENTLNCSFIEPPSVVEQPSPSWSSRGSFSSFDTTDEGPVYCVPHEESVGDGRDRAPSSSPGEKLVAPASGEEAAEYSFLKETGSVKAFHADSSETPLLKSSDSERSSCGSGSASAALYAKVARLSKQSKEEEETALSPERTKPRPPDPSTKPKVSWIHSRYNSSQSNSLPSRSPEPAAARPSSPEHGQGLAKRKRSPSETSAGVHGKAE	ANQDPVAAKKPPRRLCGRFSRISMKLPRIPLRRQKMPKVVVAHHDLENTLNCSFIEPPSVVEQPSPSWSSRGSFSSFDTTDEGPVYCVPHEESVGDGRDRAPSSSPGEKLV+PASGEEAAEYSFLKETGSVKAFHADSSETPLLKSSDSERSSCGSGSASAALYA+VARLSKQSKEEEETA SPERTKPRPPDPSTKPKVSWIHSRY+S+QSNSLPSRSPE AA RPSSPEHGQGLAKRKRSPSETSAGVHGKAE
13136	Query_316	18-contig_1230_1	896	gi|326930315|ref|XP_003211293.1|PREDICTED: leucine-rich repeat-containing protein 8A-like [Meleagris gallopavo]	XP_003211293	810	1	1379.39	3569	0	1	673	1	673	0	0	668	670	0	673	MIPVTELRYFADTQPAYRILKPWWDVFTDYISIVMLMIAVFGGTLQVTQDKMICLPCKWITKDSCNDTVRGWTAVTPERIYYNSTLVPSADTGPTGIQYDLDRHQYNYVDAVCYENRLHWFAKYFPYLVLLHTLIFLACSNFWFKFPRTSSKLEHFVSILLKCFDSPWTTRALSETVVEESDTKPAFGKMNGSMDKKSSTVSEDVEATVPMLQRTKSRIEQGIVDRSETGVLDKKEGEQAKALFEKVKKFRTHVE	MIPVTELRYFADTQPAYRILKPWWDVFTDYISIVMLMIAVFGGTLQVTQDKMICLPCKWITKDSCNDTVRGWTAVAPERIYYNSSLVPSADTGPTGIQYDLDRHQYNYVDAVCYENRLHWFAKYFPYLVLLHTLIFLACSNFWFKFPRTSSKLEHFVSILLKCFDSPWTTRALSETVVEESDTKPAFGKMNGSMDKKSSTVSEDVEATVPMLQRTKSRIEQGIVDRSETGVLDKKEGEQAKALFEKVKKFRTHVE	MIPVTELRYFADTQPAYRILKPWWDVFTDYISIVMLMIAVFGGTLQVTQDKMICLPCKWITKDSCNDTVRGWTAV PERIYYNS+LVPSADTGPTGIQYDLDRHQYNYVDAVCYENRLHWFAKYFPYLVLLHTLIFLACSNFWFKFPRTSSKLEHFVSILLKCFDSPWTTRALSETVVEESDTKPAFGKMNGSMDKKSSTVSEDVEATVPMLQRTKSRIEQGIVDRSETGVLDKKEGEQAKALFEKVKKFRTHVE
234767	Query_316	4-contig_1944_1	612	gi|326930370|ref|XP_003211320.1|PREDICTED: tyrosine-protein kinase ABL1-like [Meleagris gallopavo]	XP_003211320	1125	1	1115.91	2885	0	1	611	515	1125	0	0	589	597	0	611	MRSVVSNFLQAPELPTKTRTSRRAAESKDVNEGLETAHARGQGECDPLDHEPAISPLLPRKERVAPESSLNEDERLLPKDKKPNLFSALIKKKKKTAPTPPKRSSSFREMDGHSDRRVGGEEECRDAGNGAFIAPPTEAADPSKFQTPSNGAGVTNGVVTGNSGFLSPHLRKKSSTMSSSRGVSGEEESGSNSSKRFLRSCSASCVPHGAKDTEWKSVTLPRDLQSTGRQFDSSTFGGHKSEKPALPRKRANEAK	MRSVVSNFLQAPELPTKTRTSRRAAESKDVNEGLETAHARGQGECDPLDHEPAVSPLLPRKERVALESSLNEDERLLPKDKKPNLFSALIKKKKKTAPTPPKRSSSFREMDGHSDRRAGGEEECRDAGNGAFIAPPTEAADPSKFQSPSNGAGVTNGVVAGNSGFLSPHLRKKSSTMSSSRGVAGEEESSSNSSKRFLRSCSASCVPHGAKDTEWKSVTLPRDLQSTGRQFDSSTFGGHKSEKPALPRKRANEAK	MRSVVSNFLQAPELPTKTRTSRRAAESKDVNEGLETAHARGQGECDPLDHEPA+SPLLPRKERVA ESSLNEDERLLPKDKKPNLFSALIKKKKKTAPTPPKRSSSFREMDGHSDRR GGEEECRDAGNGAFIAPPTEAADPSKFQ+PSNGAGVTNGVV GNSGFLSPHLRKKSSTMSSSRGV+GEEES SNSSKRFLRSCSASCVPHGAKDTEWKSVTLPRDLQSTGRQFDSSTFGGHKSEKPALPRKRANEAK
44217	Query_58	90-contig_1376_1	840	gi|326930570|ref|XP_003211419.1|PREDICTED: zinc finger and BTB domain-containing protein 43-like [Meleagris gallopavo]	XP_003211419	464	1	965.296	2494	0	1	459	1	459	0	0	457	459	0	459	MESGSSSFRVEFPDFSSTILQKLNQQRQQGQLCDVSIVVQGHLFRAHKAVLAASSPYFCDQVLLKNSRRIVLPDVMNPRVFENILLSTYTGRLVMPAPEIVSYLTAASFLQMWHVVDKCTEVLEGNPTVLCQKMNHGSDHQSPSSSSYNGLAETFELGSGGQTEFHKVQELRDGENEEESSKDELSCQLTEHEYLPSNSSTEHDRLSTGMTSQDGEEGTSDSAEYQYTRPMYSKPSIMSHKRWIHVKPERFEQDC	MESGSSSFRVEFPDFSSTILQKLNQQRQQGQLCDVSIVVQGHLFRAHKAVLAASSPYFCDQVLLKNSRRIVLPDVMNPRVFENILLSTYTGRLVMPAPEIVSYLTAASFLQMWHVVDKCTEVLEGNPTVLCQKMNHGSDHQSPSSSSYNGLAETFELGSGGQTEFHKVQELRDGENEEESSKDELSCQLTEHEYLPSNSSTEHDRLSTGMTSQDGEEGTSDSAEYQYTRPIYSKPSIMSHKRWIHVKPERFEQDC	MESGSSSFRVEFPDFSSTILQKLNQQRQQGQLCDVSIVVQGHLFRAHKAVLAASSPYFCDQVLLKNSRRIVLPDVMNPRVFENILLSTYTGRLVMPAPEIVSYLTAASFLQMWHVVDKCTEVLEGNPTVLCQKMNHGSDHQSPSSSSYNGLAETFELGSGGQTEFHKVQELRDGENEEESSKDELSCQLTEHEYLPSNSSTEHDRLSTGMTSQDGEEGTSDSAEYQYTRP+YSKPSIMSHKRWIHVKPERFEQDC
306081	Query_844	30-contig_242_1	552	gi|326930823|ref|XP_003211540.1|PREDICTED: CDP-diacylglycerol--glycerol-3-phosphate 3-phosphatidyltransferase, mitochondrial-like [Meleagris gallopavo]	XP_003211540	515	1	735.332	1897	0	156	551	137	515	0	0	368	374	17	396	LLKRFPRQVRVSLFHTPNLRGLLKLLIPERFNETIGLQHIKVYLFDDNVILSGANLSDLYFTNRQDRYVLLQDSPEIADFFTELVDAIGDVSLQLQQDDTVEMMEGMVHPYQGDKVKYCEIANRRVMEVINSARTRQELLHTKTFHSSQQGSSVLPQHNSETSGGLKPEPDTWIYPLIQMKPFGIQIDEMVTETLLTEAERDARIYLTTGYFNLTQAYMDLVLGTRAEYRILLASPEVNGFFGAKGVAGAIPSAY	LLQRFPEQVRVSLFHTPNLRGLLKLLIPERFNETIGLQHIKVYLFDDNVILSGANLSDLYFTNRQDRYVLLQDSPEIADFFTELVDAIGDVSLQLQQDDTVQMMEGMVHPYQGDKVRYCEIANRRVMEVIDSARTRQELLHAKTFHSSQQGCSTLPQHDSEASGGLKPEPDTWIYPLIQMKPFGIQIDEMVTETLLTEAERDARIYLTTGYFNLTQAYMDLILGTRAEYRILLASPEVNGFFGAKGVAGAIPSAY	LL+RFP QVRVSLFHTPNLRGLLKLLIPERFNETIGLQHIKVYLFDDNVILSGANLSDLYFTNRQDRYVLLQDSPEIADFFTELVDAIGDVSLQLQQDDTV+MMEGMVHPYQGDKV+YCEIANRRVMEVI+SARTRQELLH KTFHSSQQG S LPQH+SE SGGLKPEPDTWIYPLIQMKPFGIQIDEMVTETLLTEAERDARIYLTTGYFNLTQAYMDL+LGTRAEYRILLASPEVNGFFGAKGVAGAIPSAY
12533	Query_955	18-contig_4598_1	1340	gi|326931148|ref|XP_003211696.1|PREDICTED: myotubularin-related protein 4-like [Meleagris gallopavo]	XP_003211696	1524	1	721.465	1861	0	797	1208	528	939	0	0	374	386	0	412	SRLPKTRSMDDLLSACDSSTPLTRTSSDPNLNNHCQEVRVGLEAKHSATEGAELHVGEGSVVAAAETQQEEEQQESAPLQASSAFSSSTEQEEQSKQLSSWAPVPASSVSVEKGKGNGAFTEELDGACPTPNPSKQENVGRVSTSSGKQLESCSQEPLKATGLAPTGEGCPKKNTTCQDIPSQEPLAPSAPCQEPGIPCPDEDNSRGYAGRKGPCEDPCRLGRVPLEQWRKPISQSQSSEFSFLGSNWDSFQGMV	DRLPKTRSMDDLLSACDSSSPLTRTSSDPNLNNHCQEVRVGLEARHAATEGAELHVGEGSVVAAAETQQVGEQQESAPLQASCAFNSSTEHEEQRKKLSSWASVPANDVSVETEKGNGTYMEELDGTCPAPNPSKQENVDRVSTSSGKQLESHSQEPLKATGLEPGEEGCPQKNTTSQDIPSQEPLAPSAPCQEPGVPCPDEDNSKGYTGRKGLCEDSCRMGRVPLEQWRKPISQSQSSEFSFLGSNWDSFQGMV	RLPKTRSMDDLLSACDSS+PLTRTSSDPNLNNHCQEVRVGLEA+H+ATEGAELHVGEGSVVAAAETQQ EQQESAPLQAS AF+SSTE EEQ K+LSSWA VPA+ VSVE KGNG + EELDG CP PNPSKQENV RVSTSSGKQLES SQEPLKATGL P EGCP+KNTT QDIPSQEPLAPSAPCQEPG+PCPDEDNS+GY GRKG CED CR+GRVPLEQWRKPISQSQSSEFSFLGSNWDSFQGMVT
325086	Query_982	24-contig_5753_1	863	gi|326931308|ref|XP_003211774.1|PREDICTED: schlafen family member 13-like [Meleagris gallopavo]	XP_003211774	1104	1	681.789	1758	0	39	610	591	1097	0	0	369	413	85	582	LCSALL-VRPHSLIYTPEKLIKDLFQEHEGLKSLMDEQLKDVSEGVVIFSRSWAVEVGLPENEDILCDVLLVAKGMPPILYTVWKRISSWKPENLVNSSCKHHHPLDS-FEYSRRTALKLKEKLVNTGGYTHKLCIIPKLLTLPPCFTCGEEWDLDVQKLYPQNYGLINSVNLKNFLHSLIVVLLNFRSFLSDSVGFDTGSSVCLWSARNRKNCCGPEKACSNAINMKFFTYRFFFSHSFPYLSTDWIFYCATYP	LCEQLFPMKSHSLIYTPEKLIKDLFQEHQGLKSLMDEQLKDVFEGVVIFSRSWAVEVGLSENQGIICDVLLAAKGRPPILYTV----------------CKH--PSEALFHYSRRTAWMLKKKLVNTGGYTHKLCVIPKLLTLPRSFSYGEEWDVNVQKLYPQNYGLINSINLKNLLHSLIIVLLN---------------------------------------------FRSFLSDSVGFEVLN-LLTIEQYQ	LC L ++ HSLIYTPEKLIKDLFQEH+GLKSLMDEQLKDV EGVVIFSRSWAVEVGL EN+ I+CDVLL AKG PPILYTV CKH P ++ F YSRRTA LK+KLVNTGGYTHKLC+IPKLLTLP F+ GEEWD++VQKLYPQNYGLINS+NLKN LHSLI+VLLN +R F S S + + + Y
223243	Query_348	11-contig_8127_1	1323	gi|326931362|ref|XP_003211800.1|PREDICTED: reticulon-4 receptor-like 1-like, partial [Meleagris gallopavo]	XP_003211800	444	1	689.108	1777	0	357	692	1	336	0	0	332	332	0	336	TLAELLLVLLGLKVPGAAGCPTDCVCYPSPMTVSCQAHNFVTIPEGIPEDSERIFLQNNQITLLLRGHFSPSMVTLWIYSNNITFIDPNTFEGFVNLEELDLGDNRYLRALAANTFQGLVKLHALYLYKCGLSSLPSGIFGGLHNLQYLYLQDNHIEFLQDDIFVDLVNLSHLFLHGNKLWSLHQNTFRGLINLDRLLIHQNQLQWIHRRAFHDLRRLTTLFLFNNSLSELQGDCLAHLGALEFLRLNGNPWSCD	ALAELLLVLLGLKVPGAASCPTDCVCYPSPMTVSCQAHNFVTIPEGIPEDSERIFLQNNQITLLLRGHFSPSMVTLWIYSNNITFIDPNTFEGFVNLEELDLGDNRYLRALAANTFQGLVKLHALYLYKCGLSSLPSGIFGGLHNLQYLYLQDNHIEFLQDDIFVDLVNLSHLFLHGNKLWSLHQNTFRGLINLDRLLIHQNQLQWIHRRAFHDLRRLTTLFLFNNSLSELQGDCLAHLGALEFLRLNGNPWSCD	LAELLLVLLGLKVPGAA CPTDCVCYPSPMTVSCQAHNFVTIPEGIPEDSERIFLQNNQITLLLRGHFSPSMVTLWIYSNNITFIDPNTFEGFVNLEELDLGDNRYLRALAANTFQGLVKLHALYLYKCGLSSLPSGIFGGLHNLQYLYLQDNHIEFLQDDIFVDLVNLSHLFLHGNKLWSLHQNTFRGLINLDRLLIHQNQLQWIHRRAFHDLRRLTTLFLFNNSLSELQGDCLAHLGALEFLRLNGNPWSCDC
387051	Query_819	2-contig_11148_1	4235	gi|326931686|ref|XP_003211957.1|PREDICTED: LOW QUALITY PROTEIN: rho GTPase-activating protein 39-like [Meleagris gallopavo]	XP_003211957	1156	1	808.135	2086	0	2011	2446	264	699	0	0	407	417	0	436	ETPTHWQPLPGTKAAMLVKVNSLKQVSGSSGSSLHLQSAPETNSQKSLPKPAIYAQPQSMSQIPGATKQTPTRETKQSMQIKKTENGGFCLVLMNGPTSQAPPRSQTGTPQPASPKYASPAPIYDEPSLETPIYDEPPVDMDTESVSVSGMSPPRSPSNSLKKQLQPTKLLQHPSVQQQQTAKKHARNPSSTEYSPAGREYIKHMVNVDQSSKLSHSATATSDASAKVPGQLASKDSFKQSWRILEANVLKSIEA	ETPTHWQPLPGTKAAMLVKVNSLKQVPGSSNSSLHLQCAPETNSQKSLPKPAIYAQPQSVSQSPGATKQTPPGEGKQSMQIKKTENGGFCLVLMNGPASQTPPRSQTGTPQPASPKYASPAPIYDEPSLESPIYDEPPVDMDTESIGVSGMSPPRSPSNSLKKQLQPTKLLQHPSVQQQQAAKKHARNPSSTEYSPAGREYIKHMVNVDQSSKVSHSATATADGSTKLPGQLASKDSFKQSWRILEANVLKSIEA	ETPTHWQPLPGTKAAMLVKVNSLKQV GSS SSLHLQ APETNSQKSLPKPAIYAQPQS+SQ PGATKQTP E KQSMQIKKTENGGFCLVLMNGP SQ PPRSQTGTPQPASPKYASPAPIYDEPSLE+PIYDEPPVDMDTES+ VSGMSPPRSPSNSLKKQLQPTKLLQHPSVQQQQ AKKHARNPSSTEYSPAGREYIKHMVNVDQSSK+SHSATAT+D S K+PGQLASKDSFKQSWRILEANVLKSIEA
375359	Query_962	18-contig_38094_1	1172	gi|326931937|ref|XP_003212080.1|PREDICTED: death-inducer obliterator 1-like [Meleagris gallopavo]	XP_003212080	2496	1	1007.28	2603	0	27	665	1318	1956	0	0	557	579	6	642	LQYLLLYTTISLVNKCSYVYSYIRLIVMTFLPPLSIESTDENSFHIESLCSLAGLESSRPNLILGLVICQKGKRPATGMETDKTEEKRNRIQLQEEAEPSQFSKGPTASFQEKKTPKYTLYSGDSAVSTTPPGSPPPPPPPLPVPESSAVTPSVLKILSSIKSGTTTTAPPPISATASASVTATPSSSSKTATPLEHILQTLFGKKKSFEPLAKDSETAQPSNQKAQAAAEVGMPAVPLLDPIVQQFGQMSKDKA	VAYISLYSYFSSRGRFGVVANNNRHVKDLYLIPLS--SKDPIPSKLLPFEG-PGLESSRPNLILGLVICQKGKRLATGMETDKIEEKRSRIQLQEEAEPSQFMKGPVASFQEKKTPKYTLYSGDSAVSTTPPGSPPPPPPPLPVPESSAVTPSVLKILSSIKSGTTTTAPPPTSATASPSVTATHSSSSKTATPLEHILQTLFGKKKSFEPVAKDSETAQSSNQKAQAAAEGGMAAVPLLDPIVQQFGQMSKDKA	+ Y+ LY+ S + V + R + +L PLS S D + GLESSRPNLILGLVICQKGKR ATGMETDK EEKR+RIQLQEEAEPSQF KGP ASFQEKKTPKYTLYSGDSAVSTTPPGSPPPPPPPLPVPESSAVTPSVLKILSSIKSGTTTTAPPP SATAS SVTAT SSSSKTATPLEHILQTLFGKKKSFEP+AKDSETAQ SNQKAQAAAE GM AVPLLDPIVQQFGQMSKDKA
268409	Query_1012	2-contig_5496_1	1030	gi|326931949|ref|XP_003212086.1|PREDICTED: LOW QUALITY PROTEIN: neuronal acetylcholine receptor subunit alpha-4-like [Meleagris gallopavo]	XP_003212086	619	1	781.941	2018	0	72	502	113	534	0	0	401	410	9	431	LWKPSFPKNFSLFYLLFLPSADGDFAVTHLTKAHLFYDGRIKWMPPAIYKSSCSIDVTFFPFDQQNCKMKFGSWTYDKAKIDLVSMHSHVDQLDYWESGEWVIINAVGNYNSKKYECCTEIYPDITYSFIIRRLPLFYTINLIIPCLLISCLTVLVFYLPSECGEKITLCISVLLSLTVFLLLITEIIPSTSLVIPLIGEYLLFTMIFVTLSIIITVFVLNVHHRSPRTHTMPDWVRRVFLDIVPRLLFMKRPST	IWRPD---------IVLYNNADGDFAVTHLTKAHLFYDGRIKWMPPAIYKSSCSIDVTFFPFDQQNCKMKFGSWTYDKAKIDLVSMHSHVDQLDYWESGEWVIINAVGNYNSKKYECCTEIYPDITYSFIIRRLPLFYTINLIIPCLLISCLTVLVFYLPSECGEKITLCISVLLSLTVFLLLITEIIPSTSLVIPLIGEYLLFTMIFVTLSIIITVFVLNVHHRSPRTHTMPDWVRRVFLDIVPRLLFMKRPST	+W+P ++ +ADGDFAVTHLTKAHLFYDGRIKWMPPAIYKSSCSIDVTFFPFDQQNCKMKFGSWTYDKAKIDLVSMHSHVDQLDYWESGEWVIINAVGNYNSKKYECCTEIYPDITYSFIIRRLPLFYTINLIIPCLLISCLTVLVFYLPSECGEKITLCISVLLSLTVFLLLITEIIPSTSLVIPLIGEYLLFTMIFVTLSIIITVFVLNVHHRSPRTHTMPDWVRRVFLDIVPRLLFMKRPST
105725	Query_301	17-contig_2528_1	486	gi|326932097|ref|XP_003212157.1|PREDICTED: uncharacterized protein KIAA1755-like [Meleagris gallopavo]	XP_003212157	1547	1	736.487	1900	0	10	471	79	536	0	0	385	396	10	465	APYSNCIFLHEGWPLCLHEKVVVHLAPLNPLLLRAGDFYLQAEPCQEHTARIALKHLAPDLHSVQETPIPEATYALLFTNEWLEEINHNHAGSPLCTCLVATENGITPLPWSKIATPEFVDKPKAGSSSTPMGAPGSSSLEPETPTEPIA---PTTHGTAESSVSCSNTTSIIPGCRDSWKPNQGRYPGLIKVEQAGLWQKPTTLAVPSLQEIISQNLDGEYVELLQHSHQDLGLLATSRSAAAQPRVGSWPCRG	APYSNCIFLHEGWPLCLHEKVVVHLAPLNPLLLRAGDFYLQAEPCQEHTARIALKHLSPDLDSVQETPIPEAAYALLFTNEWLEEINCNHAGSPLHTCLVATENGITPLPWSKIASPEFVDKPKAG----PSGTTGGPSPEPAAPTEPVASITPTAHGTAGSSVPYSNIAGVVPGCRDSRKPNQGRYPGLIKVEQAGLRQNPTTLAIPSLQDIISQNLEGEYVELLQLSQQDLGLLATSRSAAARPWVGSWPCRG	APYSNCIFLHEGWPLCLHEKVVVHLAPLNPLLLRAGDFYLQAEPCQEHTARIALKHL+PDL SVQETPIPEA YALLFTNEWLEEIN NHAGSPL TCLVATENGITPLPWSKIA+PEFVDKPKAG P G G S EP PTEP+A PT HGTA SSV SN ++PGCRDS KPNQGRYPGLIKVEQAGL Q PTTLA+PSLQ+IISQNL+GEYVELLQ S QDLGLLATSRSAAA+P VGSWPCRG
94980	Query_319	15-contig_21261_1	1302	gi|326932180|ref|XP_003212198.1|PREDICTED: protocadherin gamma-B1-like [Meleagris gallopavo]	XP_003212198	658	1	834.713	2155	0	262	779	66	575	0	0	430	455	10	519	SAGKGVRRLRRQRRDAPVQAEKQKRSYPALTSVPTGRKDSVLLFFSGADSAAREAWSPAEHASGLRRMEDRAVARGRGAVGRFALMAVLLPLCCRAAPERLSYTIPEELGRGSLVGPLARDLGLSPTELPLRQLRLVSSDE-RYFVLEEESGNLRVKERIDREDICGDVTPCVFSLETVVENPFNIYHVSVTIQDINDNAPRFDKEVVAIEIIESTPAGTRFPLGSGRDPDIGVNSLQNYQLTPNPLFSLVVKES	NAGNGLRRLWRPRSAAPIRAERS-RSDPA--------RLQPALFSSSVDSAAREAWSTAERASELRRMEVREAVRGREAAGRVALLTVLLLLCCRAVSERLRYAIPEELGRGSLVGPLARDLGLNPTELLVRQLRIVSGDEKRYFVLEEESGNLRVNERIDREDICGDVTPCVFGLETVVENPFNIYHVSITIQDINDNVPRFDKEFVAIEMIESAPPGTRFPLGTGRDPDIGVNSLQNYQLTPNPLFSLVVKEI	+AG G+RRL R R AP++AE+ RS PA + LF S DSAAREAWS AE AS LRRME R RGR A GR AL+ VLL LCCRA ERL Y IPEELGRGSLVGPLARDLGL+PTEL +RQLR+VS DE RYFVLEEESGNLRV ERIDREDICGDVTPCVF LETVVENPFNIYHVS+TIQDINDN PRFDKE VAIE+IES P GTRFPLG+GRDPDIGVNSLQNYQLTPNPLFSLVVKE
362088	Query_470	4-contig_35503_1	1579	gi|326932198|ref|XP_003212207.1|PREDICTED: zinc finger protein 64 homolog, isoforms 1 and 2-like, partial [Meleagris gallopavo]	XP_003212207	668	1	768.074	1982	0	699	1095	219	615	0	0	372	378	0	397	FKEKNGSLCLILCFLLTGDAPFQCQMCPAKFKINSDLKRHMRVHSGEKPYKCEYCEVRCAMKGNLKSHIRIKHSMENTLKCPECEFQCGNKTSLRHHIRTHQPEQPVKCSECNYSCSNKAALKVHERIHCKDRPFKCEFCSFDTKQRSNLTTHVRKAHGDKVKTKKQTVEKKDGDRPKQGGSRQVAKLDAKKAFKCDLCDASFVREDSLRSHKKQHSMYSGSKNNELAVLQLQMDPTRQASAPITVSHLQVPIQA	YASRNSSQLTVHLRSHTGDAPFQCQMCPAKFKINSDLKRHMRVHSGEKPYKCEYCEVRCAMKGNLKSHIRIKHSMENTLKCPECEFQCGNKTSLRHHIRTHQPEQPVKCSECNYSCSNKAALKVHERIHCKDRPFKCEFCSFDTKQRSNLTTHVRKAHGDKVKTKKQTAEKKEGDRPKQGGSRQVAKLDAKKAFKCDLCDASFVREDSLRSHKKQHSMYSGSKNNELAVLQLQMDPSRQASAPITVSHLQVPIQA	+ +N S + TGDAPFQCQMCPAKFKINSDLKRHMRVHSGEKPYKCEYCEVRCAMKGNLKSHIRIKHSMENTLKCPECEFQCGNKTSLRHHIRTHQPEQPVKCSECNYSCSNKAALKVHERIHCKDRPFKCEFCSFDTKQRSNLTTHVRKAHGDKVKTKKQT EKK+GDRPKQGGSRQVAKLDAKKAFKCDLCDASFVREDSLRSHKKQHSMYSGSKNNELAVLQLQMDP+RQASAPITVSHLQVPIQA
159743	Query_21	2-contig_3477_1	899	gi|326932261|ref|XP_003212238.1|PREDICTED: calmodulin-binding transcription activator 1-like [Meleagris gallopavo]	XP_003212238	1637	1	1473.37	3813	0	18	807	135	895	0	0	753	758	29	790	RNPDIVLVHYLNVPAIEDCGKPCGPILCSVNTDKKEWAKWTKEELIGQLKPMLEELKQEACINQTLRGSRYGALRGDAECELHGIKWTCSNGNSSSGFSVEQLVQQILDSHQTKPQPRTHNCLCTGTLGAGSSVHHKCNSAKHRIISPKVEPRTGGYSTHSEVQNNDVSEGKNEHSHGKASSREKRNGKVAKPVLLHQNSTEVSSTNQVEVPDTTQNSPVSISSGLNSDPDMADSPAVTGVSSMAVASVMGSLSQ	QNPDIVLVHYLNVPAIEDCGKPCGPILCSINTDKKEWAKWTKEELIGQLKPMF-----------------------------HGIKWTCSNGNSSSGFSVEQLVQQILDSHQTKPQPRTHNCLCTGTLGAGSSVHHKCNSAKHRIISPKVEPRTGGYSTHSEVQNNDVSEGKNEHSHGKASSREKRNGKVAKPVLLHQNSTEVSSTNQVEVPDTTQNSPVSISSGLNSDPDMADSPAVTGVSSMAVASVMGSLSQ	+NPDIVLVHYLNVPAIEDCGKPCGPILCS+NTDKKEWAKWTKEELIGQLKPM HGIKWTCSNGNSSSGFSVEQLVQQILDSHQTKPQPRTHNCLCTGTLGAGSSVHHKCNSAKHRIISPKVEPRTGGYSTHSEVQNNDVSEGKNEHSHGKASSREKRNGKVAKPVLLHQNSTEVSSTNQVEVPDTTQNSPVSISSGLNSDPDMADSPAVTGVSSMAVASVMGSLSQ
327984	Query_907	31-contig_3440_1	1689	gi|326932307|ref|XP_003212261.1|PREDICTED: ski oncogene-like [Meleagris gallopavo]	XP_003212261	750	1	656.366	1692	0	1	320	1	329	0	0	310	313	9	329	METVSRSSFQPHPGLQKTLEQFHLSSMSSLGGPAAFSARWAQEMYKKDNGKDPAEPVLHLPPIQPPPVMPGPFFMPSDRSTERCETILEGETISCFVVGGEKRLCLPQILNSVLRDFSLQQINSVCDELHIYCSRCTADQLEILKVMGILPFSAPSCGLITKTDAERLCNALLYGGTYPPHCKKEFSSTIELELTEKSFKVYHECFGKCKGLLVPELYSNPSAACIQCLDCRLMYPPHKFVVHSHKSLENRTCHW	METVSRSSFQPHPGLQKTLEQFHLSSMSSLGGPAAFSARWAQEMYKKDNGKDPAEPVLHLPPIQPPPVMPGPFFMPSDRSTERCETILEGETISCFVVGGEKRLCLPQILNSVLRDFSLQQINSVCDELHIYCSRCTADQLEILKVMGILPFSAPSCGLITKTDAERLCNALLYGGTYPPHCKKEFSSTIELELTEKSFKVYHECFGKCKGLLVPELYSNPSAACIQCLDCRLMYPPHKFVVHSHKSLENRTCHW	METVSRSSFQPHPGLQKTLEQFHLSSMSSLGGPAAFSARWAQEMYKKDNGKDPAEPVLHLPPIQPPPVMPGPFFMPSDRSTERCETILEGETISCFVVGGEKRLCLPQILNSVLRDFSLQQINSVCDELHIYCSRCTADQLEILKVMGILPFSAPSCGLITKTDAERLCNALLYGGTYPPHCKKEFSSTIELELTEKSFKVYHECFGKCKGLLVPELYSNPSAACIQCLDCRLMYPPHKFVVHSHKSLENRTCHW
138187	Query_527	15-contig_11040_1	475	gi|326932329|ref|XP_003212272.1|PREDICTED: gamma-aminobutyric acid receptor subunit delta-like [Meleagris gallopavo]	XP_003212272	428	1	807.364	2084	0	1	474	1	428	0	0	425	427	46	474	MTDIGDYIGSNIEISWLPNLDDLMKGYARNFRPGIGGPPVNVALAIEVASIDHISEVNMEYTMTVFLHQSWRDERLSYNHTNETLGLDSRFVDKLWLPDTFIVNAKSAWFHDVTVENKLIRLQPDGVILYSIRKKQVHSSICVPLTGVHFAWDRITSTVACDMDLSKYPMDEQECMLDLESYGYSSEDIVYHWSENQDEIHGLDKLQLAQFTITNYQFTTELMNFKSGNVQLKRTRTAAHTVGIFLCLHFLPAGQ	MTDIGDYIGSNIEISWLPNLDDLMKGYARNFRPGIGGPPVNVALAIEVASIDHISEVNMEYTMTVFLHQSWRDDRLSYNHTNETLGLDSRFVDKLWLPDTFIVNAKSAWFHDVTVENKLIRLQPDGVILYSIR---------------------ITSTVACDMDLSKYPMDEQECMLDLESYGYSSEDIVYHWSENQDEIHGLDKLQLAQFTITNYQFTTELMNFKS-------------------------AGQ	MTDIGDYIGSNIEISWLPNLDDLMKGYARNFRPGIGGPPVNVALAIEVASIDHISEVNMEYTMTVFLHQSWRD+RLSYNHTNETLGLDSRFVDKLWLPDTFIVNAKSAWFHDVTVENKLIRLQPDGVILYSIR ITSTVACDMDLSKYPMDEQECMLDLESYGYSSEDIVYHWSENQDEIHGLDKLQLAQFTITNYQFTTELMNFKS AGQ
15176	Query_12	3-contig_15614_1	578	gi|326932449|ref|XP_003212330.1|PREDICTED: ephrin type-A receptor 2-like [Meleagris gallopavo]	XP_003212330	787	1	1000.35	2585	0	38	575	26	535	0	0	481	497	28	538	WDLQQHVLNDSGIYLYAVCSVLQGEQENWLRTNWIYRSEAQRIFIELKFTVRDCNSFPGGGGSCKETFNLFYAESDVDYGTNFQKRQFKKIDTIAPDEITVQEDFDTRNVKLNVEVRSVGPLSRKGFYLAFQDLGACVSLLSVRVYYKTCPAVLRGLAVFPETVAGADSQQLAKVQGTCVEHAVAERVPMLHCNTDGEWLVPIEQCQCQAGYEAAGEQCQACPPGTFKAEVSLSSCQPCPEHTLPSSAAAAACPC	WDLQQHVLNDSGIYIYAVCSVLQGEQENWLRTNWIYRSEAQRIFIELKFTVRDCNSFPGGGGSCKETFNLFYAESDVDYGTNFQKRQFKKIDTIAPDEITVQEDFETRNVKLNVEVRSVGPLRRKGFYLAFQDLGACVSLLSVRVYYKTCPAVLRGLAVFPETVAGADSQQLAKVQGACVEHAVADRVPMLHCNMDGEWLVPIEQCQCQAGYEAAGEQCQACPPGTFKAEVSLSGCQPCPAHTLPSSAAADACPC	WDLQQHVLNDSGIY+YAVCSVLQGEQENWLRTNWIYRSEAQRIFIELKFTVRDCNSFPGGGGSCKETFNLFYAESDVDYGTNFQKRQFKKIDTIAPDEITVQEDF+TRNVKLNVEVRSVGPL RKGFYLAFQDLGACVSLLSVRVYYKTCPAVLRGLAVFPETVAGADSQQLAKVQG CVEHAVA+RVPMLHCN DGEWLVPIEQCQCQAGYEAAGEQCQACPPGTFKAEVSLS CQPCP HTLPSSAAA ACPC
329938	Query_369	7-contig_3671_1	720	gi|326932536|ref|XP_003212371.1|PREDICTED: mitofusin-2-like [Meleagris gallopavo]	XP_003212371	755	1	1460.28	3779	0	10	719	1	755	0	0	707	709	45	755	MSLLFSRSKSIVAVKKDKRHMAEVNASPLKHFVTAKKKINGIFEQLAAYINESSSFLEETHKNAELDPVTTEEQVLEVKGYLSKVSGISEVLARRHMKVAFFGRTSNGKSTVINAMLWDKVLPSGIGHTTNCFLRVEGTDGHEAFLLTEGSEEKKSVKTVNQLAHALHQDELLNAGSLVSVMWPNSKCPLLKDDLVLMDSPGIDVTTELDSWIDKFCLDADVFVLVANSESTLMQTEKQFFHKVNERLSRPNIFI	MSLLFTRSKSIVAVKKDKRHMAEVNASPLKHFVTAKKKINGIFEQLAAYINESSSFLEETHKNVELDPVTTEEQVLEVKGYLSKVSGISEVLARRHMKVAFFGRTSNGKSTVINAMLWDKVLPSGIGHTTNCFLRVEGTDGHEAFLLTEGSEEKKSVKTVNQLAHALHQDELLNAGSLVSVMWPNSKCPLLKDDLVLMDSPGIDVTTELDSWIDKFCLDADVFVLVANSESTLMQTEKQFFHKVNERLSRPNIFI	MSLLF+RSKSIVAVKKDKRHMAEVNASPLKHFVTAKKKINGIFEQLAAYINESSSFLEETHKN ELDPVTTEEQVLEVKGYLSKVSGISEVLARRHMKVAFFGRTSNGKSTVINAMLWDKVLPSGIGHTTNCFLRVEGTDGHEAFLLTEGSEEKKSVKTVNQLAHALHQDELLNAGSLVSVMWPNSKCPLLKDDLVLMDSPGIDVTTELDSWIDKFCLDADVFVLVANSESTLMQTEKQFFHKVNERLSRPNIFI
65211	Query_1061	2-contig_10814_1	700	gi|326932688|ref|XP_003212446.1|PREDICTED: dedicator of cytokinesis protein 5-like [Meleagris gallopavo]	XP_003212446	1913	1	943.34	2437	0	1	485	1144	1688	0	0	473	482	60	545	MVGPILEVTLVPEPELRKSTIPIFFDMMQCEYNFSGNRNFHMFENELITRLDQEVEGGRGDEQYKILLEKLLLEHCRKHKYLSASGEKFAWLVSSLLENLLDYRTIMHDESKENRMSCTVNVLNFYKEKKREDIYIRYLYKLRDLHTDCENFTEAAYTLLLHAELLQWSEKPCVPHLLQRDSYYVYSQQELKEKLYQEIISFFDKGK------------------------------KKRATFYENIMKAMRPQP	MVGPILEVTLVPEPELRKATIPIFFDMMQCEYNFSGNRNFHMFENELITRLDQEVEGGRGDEQYKILLEKLLLEHCRKHKYLSASGEKFAWLVSSLLENLLDYRTIMHDESKENRMSCTVNVLNFYKEKKREDIYIRYLYKLRDLHTDCENFTEAAYTLLLHAELLQWSEKPCVPHLLQRDSYYVYSQQELKEKLYQEIISFFDRGKMWEKAIQLSKELADMYENKVFDYEGLSNVLKKRATFYENIMKAMRPQP	MVGPILEVTLVPEPELRK+TIPIFFDMMQCEYNFSGNRNFHMFENELITRLDQEVEGGRGDEQYKILLEKLLLEHCRKHKYLSASGEKFAWLVSSLLENLLDYRTIMHDESKENRMSCTVNVLNFYKEKKREDIYIRYLYKLRDLHTDCENFTEAAYTLLLHAELLQWSEKPCVPHLLQRDSYYVYSQQELKEKLYQEIISFFD+GK KKRATFYENIMKAMRPQP
253270	Query_794	1-contig_10814_1	923	gi|326932688|ref|XP_003212446.1|PREDICTED: dedicator of cytokinesis protein 5-like [Meleagris gallopavo]	XP_003212446	1913	1	1547.33	4005	0	22	922	44	1114	0	0	813	831	194	1083	RPRGSSEAIYNYDAVQDVELSLQVGDTVHILEMYEGAEEKNDVPLEEDYQIKRHFPRNLYPFKGGDCE--GQRCKVLEDFLHGPTLLCHMMR-----------DNKTTQFRHVQQLTYSLIEWRSQILSGTLPKDELAELKKKVTAKIDYGNRILGLDLVVRDDNGNILDPDETSTISLFKAHETASKRIDERIQEEKSLQQNLELRGQPIFNTTHTYSLYVNFKNFVCNIGEDAELLMSLYDPDLSKFISENYL	RVEAAMTAIYNYDAVQDVELSLQVGDTVHILEMYEGWYRGYTL---RNKSKKGIFPETYIHLKEATVKDRGQHETVIPGELPLGQELTSTLREWAVIWHRLYVDNKTTQFRHVQQLTYSLIEWRSQILSGTLPKDELAELKKKVTAKIDYGNRILGLDLVVRDDNGNILDPDETSTISLFKAHETASKRIDERIQEEKSLQQNLELRGQPIFNTTHTYSLYVNFKNFVCNIGEDAELLMSLYDPDLSKFISENYL	R + AIYNYDAVQDVELSLQVGDTVHILEMYEG + + K FP K + GQ V+ L L +R DNKTTQFRHVQQLTYSLIEWRSQILSGTLPKDELAELKKKVTAKIDYGNRILGLDLVVRDDNGNILDPDETSTISLFKAHETASKRIDERIQEEKSLQQNLELRGQPIFNTTHTYSLYVNFKNFVCNIGEDAELLMSLYDPDLSKFISENYL
151865	Query_9	1-contig_3644_1	522	gi|326932813|ref|XP_003212507.1|PREDICTED: histone-lysine N-methyltransferase NSD3-like isoform 1 [Meleagris gallopavo]	XP_003212507	1436	1	902.508	2331	0	11	521	831	1436	0	0	467	479	101	609	LSTSACFCSLGRMVC-----RGFSGVAILVLSCKCTDVKALLEAHHDHSDPLFSSYAYKSHYLLNESNRAELMKLPMIPPPSSASKKKCEKA----------------------------------------------EICNPRSVPLNI----------QGLKHDIGDFPVFFFGSHDYYWVHQGRVFPYVEGDKSFAEGQTSINKTFKKALEEAAKRFQELKAQRESKEALEIERNSRKPPPYKHIKSNKVIG	IAAGSLFVSSHILICSNHSKRNHSSSAVNVGFCFVCARGLVVQ---DHSDPLFSSYAYKSHYLLNESNRAELMKLPMIPPPSSASKKKCEKGGKLLCCESCPASFHPECLNIDMPEGCWNCNDCKAGKKLRYKQIVWVKLGNYRWWPAEICNPRSVPLNIQGLKHDIGDFPVFFFGSHDYYWVHQGRVFPYVEGDKSFAEGQTSINKTFKKALEEAAKRFQELKAQRESKEALEIERNSRKPPPYKHIKSNKVIG	++ + F S ++C R S A+ V C +++ DHSDPLFSSYAYKSHYLLNESNRAELMKLPMIPPPSSASKKKCEK ++ N R P I QGLKHDIGDFPVFFFGSHDYYWVHQGRVFPYVEGDKSFAEGQTSINKTFKKALEEAAKRFQELKAQRESKEALEIERNSRKPPPYKHIKSNKVIG
341358	Query_715	15-contig_2782_1	4428	gi|326932892|ref|XP_003212545.1|PREDICTED: platelet-activating factor receptor-like [Meleagris gallopavo]	XP_003212545	348	1	668.307	1723	0	2504	2838	1	335	0	0	306	318	0	335	MSGVSKDDAAGTTCPIDSEFRYSLFTAFYSIIFILGFVANCYVLWIFSRIYPTKKLNEIKIFMLNLTVADLLFLVTMPLWIVYYHHHGDWIMSKFLCNVAGCLFFVNTYASVAFLMVITYNRYQAVTNPIRAAQFTTRRRGIFLSAAIWIVTVGSALYYIFDDNTNVEKIKSKNYTRCFERYDSSGDVTPVLAIHVIICILFFIIFLFILVWNIFIIRALFSKSGQQQKSAHVKQRALWMVCTVLVVFIISFVPH	MSGEGKDGAAGNVCPIDSEFRYSLFTVFYSIIFILGFVANCYVLWIFSHIYPTKKLNEIKIFMLNLTVADLLFLVTMPLWIVYYHNHGDWIMPKFLCNVAGCLFFVNTYASVAFLMVITYNRYQAVTNPIRAAQFTTQRRGIFLSAAIWIITVGSALYYFFDDNTNVEKIGSNNYTRCFERYDSTGDVTPVLAIHVIICTLFYIIFLFILAWNIIIIRTLFSKSGQQRKNAHVKQRALWMVCTVLVVFIISFVPH	MSG KD AAG CPIDSEFRYSLFT FYSIIFILGFVANCYVLWIFS IYPTKKLNEIKIFMLNLTVADLLFLVTMPLWIVYYH+HGDWIM KFLCNVAGCLFFVNTYASVAFLMVITYNRYQAVTNPIRAAQFTT+RRGIFLSAAIWI+TVGSALYY FDDNTNVEKI S NYTRCFERYDS+GDVTPVLAIHVIIC LF+IIFLFIL WNI IIR LFSKSGQQ+K+AHVKQRALWMVCTVLVVFIISFVPH
260966	Query_269	3-contig_12905_1	4400	gi|326933003|ref|XP_003212599.1|PREDICTED: gap junction alpha-9 protein-like [Meleagris gallopavo]	XP_003212599	490	1	701.819	1810	0	2400	2742	1	343	0	0	335	339	0	343	MGDWNFLGGILEEVHIHSTIIGKIWLTILFVFRMLVLGVATEDVWNDEQSEFICNTEQPGCRNVCYDEAFPISLIRYWVLQVIFVSSPSLVYMGHALYRLRALEKERQKKKAQVRVELESTELEMTEYRKRLERELRQLDQRKLNKAPLRGSLLCTYVIHIFTRSAVEVGFMIGQYLLYGFRLDPLYKCQRDPCPNVVDCFVSRPTEKTVFILFMQSIATVSLLLNVLEIIHLGFRKIKIGLCGQEENKDDRGSF	MGDWNFLGGILEEVHIHSTIIGKIWLTILFVFRMLVLGVATEDVWNDEQSEFICNTEQPGCRNVCYDEAFPISLIRYWVLQVIFVSSPSLVYMGHALYRLRALEKERQKKKAQVRVELESTELEMTEYRKRLERELRQLDQRKLNKAPLRGSLLCTYVIHIFTRSAVEVGFMIGQYLLYGFRLDPLYKCQRDPCPNVVDCFVSRPTEKTVFILFMQSIATVSLLLNVLEIIHLGFRKIKIGLCGQEENKDYRGNF	MGDWNFLGGILEEVHIHSTIIGKIWLTILFVFRMLVLGVATEDVWNDEQSEFICNTEQPGCRNVCYDEAFPISLIRYWVLQVIFVSSPSLVYMGHALYRLRALEKERQKKKAQVRVELESTELEMTEYRKRLERELRQLDQRKLNKAPLRGSLLCTYVIHIFTRSAVEVGFMIGQYLLYGFRLDPLYKCQRDPCPNVVDCFVSRPTEKTVFILFMQSIATVSLLLNVLEIIHLGFRKIKIGLCGQEENKD RG+F
307947	Query_565	15-contig_5078_1	2678	gi|326933133|ref|XP_003212663.1|PREDICTED: microtubule-actin cross-linking factor 1, isoforms 1/2/3/5-like, partial [Meleagris gallopavo]	XP_003212663	5131	1	961.059	2483	0	641	1132	2606	3097	0	0	468	485	0	492	ADRMNRLQTALASSQQFQHMFDELRTWLDDKLCQQARSQPISARLERLQSQIQEQEEFQKSLNQHSGSYEMIVAEGESLLLSIQPGEEKTALQNQLVSLKTHWEELSKQAADRHCKLKDCLQKAHKYQRHTEDLLPWVEDCKAKMSELEVTLDPVQLEATLLRSRALLSDVEKRRSLLEMLNSAADILIDASQADEDDVRDEKAAINRRMDAITEELQAKTGSIDEMSQRLKEFQESFKNVEKKLEGAKHQLEIF	ADRMNRLQTALASSQQFQHMFDELRTWLDDKLCQQARSQPISARLERLQSQIQEQEEFQKSLNQHSGSYEMIVAEGESLLLSVQPGEEKTALQNQLVSLKTHWEELSKQAADRHSKLKDCLQKAHKYQRHAEDLLPWVEDCKARVSELEVTLDPVQLEAALLRSRALLSDVEKRRSVLEMLNGAADVLIDASQSDEDDIRDEKAAINQQMDAITEELQAKTGSIDEMSQRLKEFQESFKNIEKKLEGAKHQLEIF	ADRMNRLQTALASSQQFQHMFDELRTWLDDKLCQQARSQPISARLERLQSQIQEQEEFQKSLNQHSGSYEMIVAEGESLLLS+QPGEEKTALQNQLVSLKTHWEELSKQAADRH KLKDCLQKAHKYQRH EDLLPWVEDCKA++SELEVTLDPVQLEA LLRSRALLSDVEKRRS+LEMLN AAD+LIDASQ+DEDD+RDEKAAIN++MDAITEELQAKTGSIDEMSQRLKEFQESFKN+EKKLEGAKHQLEIF
92976	Query_161	13-contig_5508_1	3048	gi|326933246|ref|XP_003212718.1|PREDICTED: rho GTPase-activating protein 32-like [Meleagris gallopavo]	XP_003212718	2003	1	1325.84	3430	0	1908	2695	1221	2003	0	0	718	745	9	790	GCSAAPGSAPQIPLAASSTSSG--WGAAAPEKPPEPAPGFATESTSTAHRSSSVPSGHQSRLEKPRESTRAPMLHLRSESVPTHSSYGFTPPAPPVRTLESKIAAAMHSNNTDAINNSNYHAFLASSMLASSVEEVLLPPPAPPPPPLPPPPLAPPPPPHPPPKHSSLQSVYIPHPKPPEGILEPSGPDIYLHHKPTSIHQYRPESVPPHMTYHSKPDQHQAYPPRSETPTSAGNRYNTYTNQGRSTSAVYSKPR	GCT--PCSALRLFASATSVCSSYVWGAATSEKPPEPASGFATESTSSSHRSSSVPSSHQSRLEKPREGTRAPLLHLRSESVPTHSSYGFTPPVPPVRTLESKIAAAMHSNNTDAINNSNYHAFLASSMLASSVEEVLLPPPAPPPPPLPPPPLAP----PPPPKHASLQSMYVPHPKP-ESVLEPSGPDVYLHHKPTSIHQYRPESVPPHMSYHSKPDQHPAYPPRSETPTSAGTRFNTYTNQGRSASAVYSKPR	GC+ P SA ++ +A+S S WGAA EKPPEPA GFATESTS++HRSSSVPS HQSRLEKPRE TRAP+LHLRSESVPTHSSYGFTPP PPVRTLESKIAAAMHSNNTDAINNSNYHAFLASSMLASSVEEVLLPPPAPPPPPLPPPPLAP PPPKH+SLQS+Y+PHPKP E +LEPSGPD+YLHHKPTSIHQYRPESVPPHM+YHSKPDQH AYPPRSETPTSAG R+NTYTNQGRS SAVYSKPR
73260	Query_364	2-contig_2963_1	2272	gi|326933415|ref|XP_003212800.1|PREDICTED: hypothetical protein LOC100547292 [Meleagris gallopavo]	XP_003212800	1871	1	1119.38	2894	0	340	1196	18	874	0	0	641	695	20	867	LLGAPRAEHHVGGAPDLSFPGGAQPRAGSSPVPITEDDLGDVTNYFQTLVGDPTNEMTADFIPGHTEMAAKATATLPMELMRDVEGSDQGHTTAAVKLQDRQLFSNELLSSVSGPMFTQGSQAATHPHHSGKAVTVTSPASSGAAPPEPIPSAGVQQGAPELTADLSSPGIQQREAPSLETSPLTPAVHFHPLRKEISPPFPTRDKMVTNPLPAPPTSNRPRDVSPQAQPDSRAAQPRGVGAKVTTSAFLLKPAS	LSGAPRAKHHVGGAQDLSFPREPQPISGTSPLSVTEDDLGEATNSVQTPAADPANEMTAHFIPSHTEVAARATATLPVEPVRDVEGSERGHTASAVKLQDRQPFPYKLLSNTSSLISTWGPRAATHPHPSGKAATITSPASSGAGTPQPIPSAGVQQGVPAL----STPGIQQREAPSLEASPLTSTAHFHALKKETAFPFSTREKMVTNPPSAPPTSKRPRDASPQAQPHSRAAQPRGMAAKVTTSAFLPKPAS	L GAPRA+HHVGGA DLSFP QP +G+SP+ +TEDDLG+ TN QT DP NEMTA FIP HTE+AA+ATATLP+E +RDVEGS++GHT +AVKLQDRQ F +LLS+ S + T G +AATHPH SGKA T+TSPASSGA P+PIPSAGVQQG P L S+PGIQQREAPSLE SPLT HFH L+KE + PF TR+KMVTNP APPTS RPRD SPQAQP SRAAQPRG+ AKVTTSAFL KPAS
218836	Query_56	12-contig_3857_1	6504	gi|326933530|ref|XP_003212855.1|PREDICTED: pogo transposable element with ZNF domain-like [Meleagris gallopavo]	XP_003212855	1283	1	914.45	2362	0	95	578	759	1242	0	0	458	462	0	484	SRHVQPQDRSTKNTCPAYSPSKAATVKTKSALPAKDDLEPEVALGAHTRPLLGQEEGCLNIDAQEDEQPMKEPEPASRKEQLSVKKLRVVLFALCCSTEQAAEHFRNPQRRIKRWLRRFQAFQEENLASLSEGKYLSLEAEEKLAEWVLTQREQQLPVNEETLFQKATKLGRSLEGGFKISYEWAVRFMLRHNLSMHTRRAVAHPLPKEVEDNAGCFIEFVQRQIHTQDLPLSMIAAIDEISLFLDVEVLSSDDK	SRHIQPQDRSVKNTCPAYSPSKAATVKTKSVLPTKDDLEPEVALAAHTRPLLCQEEECLKIDAQEDEQPMKETETASKKEQLSVKKLRVVLFALCCSTEQAAEHFRNPQRRIKRWLRRFQAFQEENLASLSEGKYLSLEAEEKLAEWVLTQREQQLPVNEETLFQKATKLGRSLEGGFKISYEWAVRFMLRHNLSMHARRAVAHPLPKEVEDNAGCFIEFVQRQIHTQDLPLSMIAAIDEISLFLDVEVLSSDDK	SRH+QPQDRS KNTCPAYSPSKAATVKTKS LP KDDLEPEVAL AHTRPLL QEE CL IDAQEDEQPMKE E AS+KEQLSVKKLRVVLFALCCSTEQAAEHFRNPQRRIKRWLRRFQAFQEENLASLSEGKYLSLEAEEKLAEWVLTQREQQLPVNEETLFQKATKLGRSLEGGFKISYEWAVRFMLRHNLSMH RRAVAHPLPKEVEDNAGCFIEFVQRQIHTQDLPLSMIAAIDEISLFLDVEVLSSDDK
284954	Query_161	28-contig_3698_1	4431	gi|326933587|ref|XP_003212883.1|PREDICTED: receptor-type tyrosine-protein phosphatase V-like [Meleagris gallopavo]	XP_003212883	2967	1	776.933	2005	0	1997	2446	2461	2916	0	0	390	403	12	459	GPFKPCDHLFESWIIRLGVWGIVLVSVLCNGLVVLAVFASPSYLSPVKFVIGSIAGANTLSGVACSMLALVDALTYGRFAQFGARWERGAGCRVTGFLAVFSSQAAVFLLALAAVQCSVSVSCARGCRKAPALGRVKAAVLGCLLLSSMAAVLPLFSIGEYGASPLCLPYPIPGGKPATLGFTVALAMTNVLCFLAATGTYIRLYCSLLKGECGAVWDCAMVRHVAWLIFTNCLLYCPVAFLTFSSTLNLFLITP	GPFKPCDHLFESWIIRLGVWVIVLVSVLCNGLVVLAVFASPSYLSPVKFVIGSIAGANTLSGVSCSMLALVDALTYGHFAQFGARWESGTGCRVTGFLAMFSSEAAIFLLTLAAVQCSVSVSCARGCRKAPSLGKVKAAALGCLLLSSVAAVLPLFSIGEYGASPLCLPYPIPGGKPATLGFTVALAMTNVLCFLVVTGTYIRLYCSLLKGECGAVWDCAMVKHVAWLIFTNCLLYCPVAFLTFSSTLNLFLITP	GPFKPCDHLFESWIIRLGVW IVLVSVLCNGLVVLAVFASPSYLSPVKFVIGSIAGANTLSGV+CSMLALVDALTYG FAQFGARWE G GCRVTGFLA+FSS+AA+FLL LAAVQCSVSVSCARGCRKAP+LG+VKAA LGCLLLSS+AAVLPLFSIGEYGASPLCLPYPIPGGKPATLGFTVALAMTNVLCFL TGTYIRLYCSLLKGECGAVWDCAMV+HVAWLIFTNCLLYCPVAFLTFSSTLNLFLITP
303944	Query_1038	2-contig_23439_1	572	gi|326933732|ref|XP_003212954.1|PREDICTED: LOW QUALITY PROTEIN: solute carrier family 45 member 3-like [Meleagris gallopavo]	XP_003212954	569	1	1070.84	2768	0	1	571	1	569	0	0	542	552	2	571	MALGVLLHSRRAQLLLLNSLTFGLEVCLAAGITYVPPLLLEVGVEEKFMTMVLGIGPVLGLVFVPLIGSASDHWHSSYGRRRPFIWVLCLGVLLSLFVIPHSGSLARLFTLDTRPLEIAFLILGIGLLDFCGQVCFTPLEALLSDLFQEPDNCRQAFSMYAFMISLGGCVGYLLPAIDWGASFLAPYLGGQETCLFSLLAVIFLGCVLATLFVTEEAAAQVDALDGPALKDALPKPSPPWCCSCQLPRSILQARH	MALNVLLHNRRAQLLLLNSLTFGLEVCLAAGITYVPPLLLEVGVEEKFMTMVLGIGPVLGLVFVPLIGSASDHWHSSYGRRRPFIWVLCLGVLLSLFIIPHSSSLASLFALNTRPLEIAFLILGIGLLDFCGQVCFTPLEALLSDLFQEPDNCRQAFSMYAFMIXLGGCIGYLLPAIDWGASFLAPYLGGQETCLFSLLAVIFLGCVLATLFVTEEAAAQADALDGPALKDALPKPSPSACCSCQLSTSFLQARH	MAL VLLH+RRAQLLLLNSLTFGLEVCLAAGITYVPPLLLEVGVEEKFMTMVLGIGPVLGLVFVPLIGSASDHWHSSYGRRRPFIWVLCLGVLLSLF+IPHS SLA LF L+TRPLEIAFLILGIGLLDFCGQVCFTPLEALLSDLFQEPDNCRQAFSMYAFMI LGGC+GYLLPAIDWGASFLAPYLGGQETCLFSLLAVIFLGCVLATLFVTEEAAAQ DALDGPALKDALPKPSP CCSCQL S LQARH
132539	Query_846	3-contig_14828_1	622	gi|326933755|ref|XP_003212965.1|PREDICTED: complement receptor type 2-like [Meleagris gallopavo]	XP_003212965	720	1	950.273	2455	0	32	621	116	714	0	0	450	506	9	599	FSTSDVVEYNCRPGY--MRNFKVRSTYVCEKNRWKGSNNFCLPIPCLPPPNIENGEHNGGDVALFTYGASVTYRCLNDNRGMKRFSMVGDASIFCTTTDNLNGVWNKPAPECKVVSCREPQVEHGRLQSRYRAEYTFGDVVIFECEFRYEMQGSYMSSCDEDGNWDPPLPLCQRSSCDDPPDVQNAVKARLAGNLFPVETIITYECKTGYEFSPGVVMQHISCLPGFTWSEIPLPCEKISCPKPSTKRGMHISSW	FTFGSIANYSCDTGYRLVGNSQIRCVIKDGHVTWDGNTPICEPIPCLPPPKIANGDHNRGDVALFTYGASVTYHCHTDSRGRKLFSMVGDASIFCTTTDNVNGVWNKPAPECKVVSCREPQVEHGRLQSRYRAEYTYGDTVVFDCEFRYVLLGSDTSMCQEDGSWDPPLPQCQRSSCDDPPDVQNAVKARLAGNLFPVETVITYECQTGYEFSPGVVTQNINCLPDYTWTEIPPPCKRISCPNPATKRGMHISSW	F+ + Y+C GY + N ++R W G+ C PIPCLPPP I NG+HN GDVALFTYGASVTY C D+RG K FSMVGDASIFCTTTDN+NGVWNKPAPECKVVSCREPQVEHGRLQSRYRAEYT+GD V+F+CEFRY + GS S C EDG+WDPPLP CQRSSCDDPPDVQNAVKARLAGNLFPVET+ITYEC+TGYEFSPGVV Q+I+CLP +TW+EIP PC++ISCP P+TKRGMHISSW
384549	Query_90	8-contig_14757_1	487	gi|326933767|ref|XP_003212971.1|PREDICTED: LOW QUALITY PROTEIN: plexin-A2-like [Meleagris gallopavo]	XP_003212971	1876	1	931.013	2405	0	1	458	1	458	0	0	449	452	0	458	MDRRRTCPRALLSDGDGGSAALLCLLLASLSWSTSGSSSFSTFHSEHRDWTFNHLTVHQGTGAVYVGAINRVYKLSGNLTILVAHKTGPEEDNKSCYPPLIVQPCSEVLTLTNNVNKLLIIDYSENRLLACGSLYQGVCKLLRLDDLFILVEPSHKKEHYLSSVNKTGTMYGVIVRSEGEDGKLFIGTAVDGKQDYFPTLSSRKLPRDPESSAMLDYELHSDFVSSLIKIPSDTLALISHFDIFYIYGFASGNFV	MDRRRTCPWALRSDGDGRSASLLCLLLASLSWSASSSTSFSTFHSEHRDWTFNHLTVHQSTGAVYVGAINRVYKLSGNLTILVAHKTGPEEDNKSCYPPLIVQPCSEVLTLTNNVNKLLIIDYSENRLLACGSLYQGVCKLLRLDDLFILVEPSHKKEHYLSSVNKTGTMYGVIVRSEGEDGKLFIGTAVDGKQDYFPTLSSRKLPRDPESSAMLDYELHSDFVSSLIKIPSDTLALISHFDIFYIYGFASGNFV	MDRRRTCP AL SDGDG SA+LLCLLLASLSWS S S+SFSTFHSEHRDWTFNHLTVHQ TGAVYVGAINRVYKLSGNLTILVAHKTGPEEDNKSCYPPLIVQPCSEVLTLTNNVNKLLIIDYSENRLLACGSLYQGVCKLLRLDDLFILVEPSHKKEHYLSSVNKTGTMYGVIVRSEGEDGKLFIGTAVDGKQDYFPTLSSRKLPRDPESSAMLDYELHSDFVSSLIKIPSDTLALISHFDIFYIYGFASGNFV
189167	Query_525	4-contig_5501_1	602	gi|326933984|ref|XP_003213077.1|PREDICTED: c-type mannose receptor 2-like [Meleagris gallopavo]	XP_003213077	1446	1	761.14	1964	0	20	421	961	1364	0	0	373	380	2	404	VTSWPPPAPAPGLLGVALSVC--PSLAAFITSMLLNISFDLWIGLHDAKKEFQWVDGEPLRHVSWAPGEPSECSSSSPGDKPTNCVVVWHGSPPHFTGRWDDRSCVEEKHGYICQRSIDPSLSPARTPYPPSPTGPLFYHNSTYRILQKPLRWHEALLLCETLNATLASIPDPYSQAFLTQAISSLRTPLWIGLANNEGGRSYSWLMEENLFYANWQDGEPQQAAGCAYMDVDGSWRTAGCDTKLQGGICQLQSG	IVKWPEAKQACENQGAVLATISSPLEQAFITSMLLNISFDLWIGLHDAKKEFQWVEGEPLRHVSWAPGEPSECSSSSPGDKPTNCVLVWHGSPPHFTGRWDDRSCVEEKHGYICQRSIDPTLSPARTPYPPSPTGTLFYHNSTYRILQKPLRWHEALLLCETLNATLATIPDPYSQAFLTQAISSLRAPLWIGLANNEGGRSYSWLSEENLFYANWQDGEPQQAAGCAYMDVDGSWRTAGCDTKLQGGICQLQSG	+ WP A G L+ P AFITSMLLNISFDLWIGLHDAKKEFQWV+GEPLRHVSWAPGEPSECSSSSPGDKPTNCV+VWHGSPPHFTGRWDDRSCVEEKHGYICQRSIDP+LSPARTPYPPSPTG LFYHNSTYRILQKPLRWHEALLLCETLNATLA+IPDPYSQAFLTQAISSLR PLWIGLANNEGGRSYSWL EENLFYANWQDGEPQQAAGCAYMDVDGSWRTAGCDTKLQGGICQLQSG
388882	Query_261	3-contig_23016_1	318	gi|326934011|ref|XP_003213090.1|PREDICTED: cell division cycle protein 27 homolog [Meleagris gallopavo]	XP_003213090	882	1	671.389	1731	0	1	317	566	882	0	0	317	317	0	317	MQAERIFSEVRRIENYRVEGMEIYSTTLWHLQKDVALSVLSKDLTDMDKNSPEAWCAAGNCFSLQREHDIAIKFFQRAIQVDPNYAYAYTLLGHEFVLTEELDKALACFRNAIRVNPRHYNAWYGLGMIYYKQEKFSLAEMHFQKALDINPQSSVLLCHIGVVQHALKKSEKALDTLNKAINIDPKNPLCKFHRASVLFANEKYKSALQELEELKQIVPKESLVYFLIGKVYKKLGQTHLALMNFSWAMDLDPKG	MQAERIFSEVRRIENYRVEGMEIYSTTLWHLQKDVALSVLSKDLTDMDKNSPEAWCAAGNCFSLQREHDIAIKFFQRAIQVDPNYAYAYTLLGHEFVLTEELDKALACFRNAIRVNPRHYNAWYGLGMIYYKQEKFSLAEMHFQKALDINPQSSVLLCHIGVVQHALKKSEKALDTLNKAINIDPKNPLCKFHRASVLFANEKYKSALQELEELKQIVPKESLVYFLIGKVYKKLGQTHLALMNFSWAMDLDPKG	MQAERIFSEVRRIENYRVEGMEIYSTTLWHLQKDVALSVLSKDLTDMDKNSPEAWCAAGNCFSLQREHDIAIKFFQRAIQVDPNYAYAYTLLGHEFVLTEELDKALACFRNAIRVNPRHYNAWYGLGMIYYKQEKFSLAEMHFQKALDINPQSSVLLCHIGVVQHALKKSEKALDTLNKAINIDPKNPLCKFHRASVLFANEKYKSALQELEELKQIVPKESLVYFLIGKVYKKLGQTHLALMNFSWAMDLDPKG
31814	Query_859	2-contig_100721_1	393	gi|326934029|ref|XP_003213099.1|PREDICTED: potassium voltage-gated channel subfamily H member 2-like [Meleagris gallopavo]	XP_003213099	1146	1	645.58	1664	0	6	377	8	332	0	0	323	324	47	372	PVQVLSLGADVLPEYKLQAPRIHKWTILHYSPFKAVWDWLILLLVIYTAIFTPYSAAFLLNDQEEAQRHNCGYSCSPLNVVDLIVDIMFIIDILINFRTTYVNSNEEVVSHPAKIAIHYFKGWFLIDMVAAIPFDLLIFGSGSEEGTGMEMGTGLGMGLRTGLGRVWLVTELDGVWGSGLPRGPAALGAPSQTTTLIGLLKTARLLRLVRVARKLDRYSEYGAAVLFLLMCTFALIAHWLACIWYAIGNVEGQRI	PGQVLSLGADVLPEYKLQAPRIHKWTILHYSPFKAVWDWLILLLVIYTAIFTPYSAAFLLNDQEEAQRHNCGYSCSPLNVVDLIVDIMFIIDILINFRTTYVNSNEEVVSHPAKIAIHYFKGWFLIDMVAAIPFDLLIFGSGSEE-----------------------------------------------TTTLIGLLKTARLLRLVRVARKLDRYSEYGAAVLFLLMCTFALIAHWLACIWYAIGNVEGQRI	P QVLSLGADVLPEYKLQAPRIHKWTILHYSPFKAVWDWLILLLVIYTAIFTPYSAAFLLNDQEEAQRHNCGYSCSPLNVVDLIVDIMFIIDILINFRTTYVNSNEEVVSHPAKIAIHYFKGWFLIDMVAAIPFDLLIFGSGSEE TTTLIGLLKTARLLRLVRVARKLDRYSEYGAAVLFLLMCTFALIAHWLACIWYAIGNVEGQRI
146658	Query_273	9-contig_1058_1	578	gi|326934306|ref|XP_003213232.1|PREDICTED: tyrosine-protein kinase ZAP-70-like isoform 2 [Meleagris gallopavo]	XP_003213232	602	1	1173.69	3035	0	1	577	1	602	0	0	566	570	25	602	MPDAAAHLPFYYGSIARSEAEEYLKLAGMSDGLFLLRQCLRSLGGYVLSMVCNLQFYHYAIERQMNGTYAIAGGKAHCGPEELCEFYSKDADGLCCTLRKPCNRPSGVEPQPGVFDSMRDNMVREYVRQTWRLEGDALEQAIISQAPQVEKLIATTAHERMPWYHGNIARDEAERRLYSGAQPDGKFLLRDKKENGTYALSLVYGKTVYHYRIDQDKSGKYSIPEGTKFDTLWQLVEYLKLKPDGLIFYLRESCP	MPDAAAHLPFYYGSIARSEAEEYLKLAGMSDGLFLLRQCLRSLGGYVLSMVCNLQFYHYAIERQMNGTYAIAGGKAHCGPEELCEFYSKDADGLCCTLRKPCNRPSGVEPQPGVFDSMRDNMVREYVRQTWRLEGDALEQAIISQAPQVEKLIATTAHERMPWYHGNIARDEAERRLYSGAQPDGKFLLRDKKESGTYALSLVYGKTVYHYRIDQDKSGKYSIPEGTKFDTLWQLVEYLKLKPDGLIFYLRESCP	MPDAAAHLPFYYGSIARSEAEEYLKLAGMSDGLFLLRQCLRSLGGYVLSMVCNLQFYHYAIERQMNGTYAIAGGKAHCGPEELCEFYSKDADGLCCTLRKPCNRPSGVEPQPGVFDSMRDNMVREYVRQTWRLEGDALEQAIISQAPQVEKLIATTAHERMPWYHGNIARDEAERRLYSGAQPDGKFLLRDKKE+GTYALSLVYGKTVYHYRIDQDKSGKYSIPEGTKFDTLWQLVEYLKLKPDGLIFYLRESCP
305500	Query_514	4-contig_21567_1	628	gi|326934312|ref|XP_003213235.1|PREDICTED: uncharacterized protein C19orf29-like [Meleagris gallopavo]	XP_003213235	698	1	1167.14	3018	0	1	627	98	698	0	0	597	597	26	627	MKEEKKKQAALMKALETPEEKRARRLAKKEAKERKKREKMGWGEEYMGYTNTDNPFGDNNLLGTFIWSKALEKKGISHLDEKDLKERNKRIQEDNRLELQKVKQLRLEREREKAMREQELEMLQREKEAEHFKTWEEQEDNFHLQQAKLRWVGSSAGTGWWGEQEGRYSLSVFSPRSKIRIRDGRAKPIDLLAKYISAEDDDLAVEMHEPYTFLNGLTVSDMEDLVEDIQVYMELEQGKNVDFWRDMTIITEDEI	MKEEKKKQAALMKALETPEEKRARRLAKKEAKERKKREKMGWGEEYMGYTNTDNPFGDNNLLGTFIWSKALEKKGISHLDEKDLKERNKRIQEDNRLELQKVKQLRLEREREKAMREQELEMLQREKEAEHFKTWEEQEDNFHLQQAKLR--------------------------SKIRIRDGRAKPIDLLAKYISAEDDDLAVEMHEPYTFLNGLTVSDMEDLVEDIQVYMELEQGKNVDFWRDMTIITEDEI	MKEEKKKQAALMKALETPEEKRARRLAKKEAKERKKREKMGWGEEYMGYTNTDNPFGDNNLLGTFIWSKALEKKGISHLDEKDLKERNKRIQEDNRLELQKVKQLRLEREREKAMREQELEMLQREKEAEHFKTWEEQEDNFHLQQAKLR SKIRIRDGRAKPIDLLAKYISAEDDDLAVEMHEPYTFLNGLTVSDMEDLVEDIQVYMELEQGKNVDFWRDMTIITEDEI
22891	Query_458	6-contig_5034_1	1259	gi|326934552|ref|XP_003213352.1|PREDICTED: insulin receptor-like [Meleagris gallopavo]	XP_003213352	1335	1	1785.77	4624	0	279	1258	384	1335	0	0	891	903	42	987	NYSFYALDNQNLRQLWDWSKHNLTIARGKLFFHYNPKLCLSEIHKMEEISGTKGRQERNDIALKTNGDQASCENELLKFSSIRTSHDKILLKWEPYWPPDFRDLLGFMLFYKEAPYQNVTEFDGQDACGSNSWTVVDVDPPPRSNEPKAQAQPGWLLRGLKPWTQYAVFVKTLVTFSDERRTYGAKSEIIYVQTNATVPSVPLDPISVSNSSSQIILKWKPPSEPNGNITHYLVFWQQQAEDSELYELDYCLKGL	NYSFYALDNQNLRQLWDWSKHNLTIARGKLFFHYNPKLCLSEIHKMEEISGTKGRQERNDIALKTNGDQASCENELLKFSSIRTSHDKILLKWEPYWPPDFRDLLGFMLFYKEAPYQNVTEFDGQDACGSNSWTVVDVDPPPRSNEPKAQAQPGWLLRGLKPWTQYAVFVKTLVTFSDERRTYGAKSEIIYVQTNATVPSVPLDPISVSNSSSQIILKWKPPSEPNGNITHYLVFWQQQAEDSELYELDYCLKGL	NYSFYALDNQNLRQLWDWSKHNLTIARGKLFFHYNPKLCLSEIHKMEEISGTKGRQERNDIALKTNGDQASCENELLKFSSIRTSHDKILLKWEPYWPPDFRDLLGFMLFYKEAPYQNVTEFDGQDACGSNSWTVVDVDPPPRSNEPKAQAQPGWLLRGLKPWTQYAVFVKTLVTFSDERRTYGAKSEIIYVQTNATVPSVPLDPISVSNSSSQIILKWKPPSEPNGNITHYLVFWQQQAEDSELYELDYCLKGL
342692	Query_781	7-contig_32106_1	1163	gi|326934588|ref|XP_003213370.1|PREDICTED: mediator of RNA polymerase II transcription subunit 26-like [Meleagris gallopavo]	XP_003213370	602	1	1097.42	2837	0	369	962	7	598	0	0	534	553	2	594	IFGASYRAFLRVSINEQEFTSKTESEFCLERCVFETRLGRLINEVRKKTSNEELAKRAKKLLRNWQKLIEPVTPSEAVPRALPNPPGSANGGAHNCKAEAAVPAAAGPKPISELKSRNDIQKLNSPKAEKLGNRKRKGEHRDGHQGPPAPKVSKVSHEILQNSSPPPTNGIGGSPENFPSPVDVNLHAGPESSRTELSENDKHSKIPVNAVKPHTSSPGLVKPSSTSSLLKTAVLQQHEKSEESTGSHQPKSPRC	IFGEIFQIHNMVAV--LEVISSLEKYPITKEALEETRLGRLINEVRKKTSNEELAKRAKKLLRNWQKLIEPVTPNEAVPRGLQNPPGSANGGAHNCKPEAPLPAVAGSKPISELKSRNDIQKLNSPKPEKLGNRKRKGEHRDGHQGPPPPKVSKVSHEILQNSSPPPTNGIGGSPENFPSPVDVNLHAGPESSRTELSENDKHNKIPVNAVKPHTSSPGLVKPSSTSSLLKTAVLQQHDKSEETSGSHQPKSPRC	IFG ++ V++ E S E + + ETRLGRLINEVRKKTSNEELAKRAKKLLRNWQKLIEPVTP+EAVPR L NPPGSANGGAHNCK EA +PA AG KPISELKSRNDIQKLNSPK EKLGNRKRKGEHRDGHQGPP PKVSKVSHEILQNSSPPPTNGIGGSPENFPSPVDVNLHAGPESSRTELSENDKH+KIPVNAVKPHTSSPGLVKPSSTSSLLKTAVLQQH+KSEE++GSHQPKSPRC
392656	Query_303	10-contig_7458_1	793	gi|326935105|ref|XP_003213619.1|PREDICTED: recQ-mediated genome instability protein 1-like [Meleagris gallopavo]	XP_003213619	629	1	1089.72	2817	0	128	730	1	603	0	0	537	563	0	603	MSTPNVTARVETWLSSTWHVKVPLSWLEACINWIQEENGGGNLSQAQINRQVFEQWLLTDLRDLEYPVLPDGILDAPKGELSGFYSLQIDSLLDVSQPAYSQLQKIRGKSTVNEEVTANTQAFQKPWEAKPTRMLMLQLTDGIRQIQGMEYQPVPVLHSNLPPGTKITVHGNVAYRLGVLLLKPENVKLLGGEVDALLEEYSQERVLARLLGEAENCNSVGQPGHERIVPSPVNELGQILGPSDEELLASLDENN	MSTPNVTARVETWLSSTWHIKVPLTWLEACINWIQEENGGGNLSQAQINRQVFEQWLFTDLRDLEYPVLPVGILDAPKGELSGFYSLQIDSLLDVSQPAYSQLQKIRGKSTVNEEVTANTQAFQKPWEAKPTRMLMLQLTDGIHQIQGMEYEPVPVLHSNLPPGTKITVHGNVAYRLGVLLLKPENVKLLGGEVDALLEEYSQERVLAGLLGEAENPDSVGQAGHEQIVLGPVDELGQTLGPSDEELLASLDENN	MSTPNVTARVETWLSSTWH+KVPL+WLEACINWIQEENGGGNLSQAQINRQVFEQWL TDLRDLEYPVLP GILDAPKGELSGFYSLQIDSLLDVSQPAYSQLQKIRGKSTVNEEVTANTQAFQKPWEAKPTRMLMLQLTDGI QIQGMEY+PVPVLHSNLPPGTKITVHGNVAYRLGVLLLKPENVKLLGGEVDALLEEYSQERVLA LLGEAEN +SVGQ GHE+IV PV+ELGQ LGPSDEELLASLDENN
283367	Query_663	42-contig_4510_1	1205	gi|326935341|ref|XP_003213731.1|PREDICTED: LOW QUALITY PROTEIN: a-kinase anchor protein 2-like, partial [Meleagris gallopavo]	XP_003213731	870	1	1165.6	3014	0	97	704	1	608	0	0	573	588	0	608	KSSRIPEDDIRLKKNRDQNCANFLEPATVLATKEEKMEIEVPVSEHKSITTVASPHPIDNPTHFFSSAASHNGLKDRHESLDSEVAKEIRYLDEVLEANCCDSSADNTFNGTSSPQLSAVPIMDGSGASVNVSNDSVPNAREENVGDKQAPLVVKPHEVSTTGENLNSNGHSLGGLKEDVGESLKVPGSPTSSNSSRRSSKDGETTLTTLKKEAKFELRAFHEDKKPSKLFEDEDEKEKYRVRKVRPSEEMIELE	KSSRIPEDDIRLKKIRDQNCANFLEPATALAKKEEKMEIEVPVSEHKSITTVASPHPIDNPTHFFSSAASHNGLKDRHESLDSEVAKEIRYLDEVLEANCCDSSADNTFNGTSSPQLSAVTIMDGSGASVNVSNDSVPNAREENVADKQAPLVVKPHEASSTCESLNSNGHSLGGLKEDIGESLKMPGSPTSSNSSRRSSKDGETTLTTLKKEAKFELRAFHEDKKPSKLFEDEDEKEKYRVRKARPSEEMIELE	KSSRIPEDDIRLKK RDQNCANFLEPAT LA KEEKMEIEVPVSEHKSITTVASPHPIDNPTHFFSSAASHNGLKDRHESLDSEVAKEIRYLDEVLEANCCDSSADNTFNGTSSPQLSAV IMDGSGASVNVSNDSVPNAREENV DKQAPLVVKPHE S+T E+LNSNGHSLGGLKED+GESLK+PGSPTSSNSSRRSSKDGETTLTTLKKEAKFELRAFHEDKKPSKLFEDEDEKEKYRVRK RPSEEMIELE
265358	Query_212	1-contig_46675_1	383	gi|326935676|ref|XP_003213894.1|PREDICTED: long-chain fatty acid transport protein 1-like [Meleagris gallopavo]	XP_003213894	646	1	652.129	1681	0	68	382	332	646	0	0	311	314	0	315	AIIQYIGEICRYLLNQPVRESETQHCVRLAVGNGLRPTIWEDFTKRFRIKQIGEFYGATECNCSIANVDGKVGACGFNSRILPNVYPIRLVKVNEDTMELIRDSRGLCVPCRPGEPGLLVGQINQQDPLRRFDGYVNESATHKKIAYNVLQKGDQAYLSGDVLVMDELGYMYFRDRSGDTFRWRGENVSTTEVEGMLSHILNQTDVAVYGVEVPGVEGKAGMAAIADPKTKVNPNILYQELQKVLPSYARPIFLR	TIIQYIGEICRYLLNQPVRESETQHCVRLAVGNGLRPTIWEDFTKRFRIKQIGEFYGATECNCSIANLDGKVGACGFNSRILPNVYPIRLVKVNEDTMELIRDSRGLCVPCRPGEPGLLVGQINQQDPLRRFDGYVNESATHKKIAYNVLQKGDQAYLSGDVLVMDELGYMYFRDRSGDTFRWRGENVSTTEVEGMLSHILNQTDVAVYGVEVPGVEGKAGMAAIADPKTKVNPNILYQELQKVLPSYARPIFLR	IIQYIGEICRYLLNQPVRESETQHCVRLAVGNGLRPTIWEDFTKRFRIKQIGEFYGATECNCSIAN+DGKVGACGFNSRILPNVYPIRLVKVNEDTMELIRDSRGLCVPCRPGEPGLLVGQINQQDPLRRFDGYVNESATHKKIAYNVLQKGDQAYLSGDVLVMDELGYMYFRDRSGDTFRWRGENVSTTEVEGMLSHILNQTDVAVYGVEVPGVEGKAGMAAIADPKTKVNPNILYQELQKVLPSYARPIFLRL
113478	Query_452	16-contig_88_1	909	gi|326935700|ref|XP_003213906.1|PREDICTED: pannexin-2-like, partial [Meleagris gallopavo]	XP_003213906	721	1	1004.97	2597	0	12	497	119	604	0	0	483	484	0	486	EEPIYCYTPHNFTRDQALYARGYCWTELKDALPGVDASHWPSLFEHKFLPYALLAFAGIMYIPALGWEFLASTRLTSELNFLLQEIDNCYHRAAEGRAPKIEKQIQSKGPGITEREKREIIENAEKEKSPEQNLFEKYLERRGRSNFLAKLYLARHLFIIFLSIIPITYLSTYYATQKQNEFTCALGEPPDKTSSSKLHIRVNCKLPSVQLQRIIAGVDIFLLCFMNLIILINLIHLFIFRKSNFIFDKLNKVGI	EEPIYCYTPHNFTRDQALYARGYCWTELKDALPGVDASHWPSLFEHKFLPYALLAFAGIMYIPALGWEFLASTRLTSELNFLLQEIDNCYHRAAEGRAPKIEKQIQSKGPGITEREKREIIENAEKEKSPEQNLFEKYLERRGRSNFLAKLYLARHLFIIFLSIIPITYLSTYYATQKQNEFTCALGEPPDKTSSSKLHIRVNCKLPSVQLQRIIAGVDIFLLCFMNLIILINLIHLFIFRKSNFIFDKLNKVGI	EEPIYCYTPHNFTRDQALYARGYCWTELKDALPGVDASHWPSLFEHKFLPYALLAFAGIMYIPALGWEFLASTRLTSELNFLLQEIDNCYHRAAEGRAPKIEKQIQSKGPGITEREKREIIENAEKEKSPEQNLFEKYLERRGRSNFLAKLYLARHLFIIFLSIIPITYLSTYYATQKQNEFTCALGEPPDKTSSSKLHIRVNCKLPSVQLQRIIAGVDIFLLCFMNLIILINLIHLFIFRKSNFIFDKLNKVGI
390777	Query_815	3-contig_4517_1	1321	gi|326936519|ref|XP_003214301.1|PREDICTED: chondroitin sulfate glucuronyltransferase-like [Meleagris gallopavo]	XP_003214301	677	1	862.833	2228	0	426	848	254	676	0	0	415	419	0	423	EGVSMQIRNLTSLTPAGEASLTWPVGINSPFLPKSRFEVISWDYFTEQHLFSCLDGSPKCELSGASKADVSDIIESALEQLNSRYQPLLRFSKRQLLNGYRRFDPTRGMEYTLDLLLEAVTQKGHSHVLVKRVSLVRPLSKVEIIPMPYVTEATRVQLVLPLTVQDLDFVSNFLDMYAMNTLDTHDNALLTLLFIYHPYDAQRVSQVDVFAGVKAMVGELEKRYAEVKIPWISVKTEVPSQVKLMDIVSKKHPVD	QELQMQIRNLTSLTPAGEASLTWPVGINSPFLPKSRFEVISWDYFTEQHLFSCLDGSPKCELSGASKADVSDIIESALEHLNSHYQPLLRFSKRQLLNGYRRFDPTRGMEYTLDLLLEAVTQKGHSHVLVKRVSLVRPLSKVEIIPMPYVTEATRVQLVLPLTVQDLDFVSNFLDMYAMNTLDTHDNALLTLLFIYHPYDAQRVSQVDVFAGVKAMVGELEKRYAEVKIPWISVKTEVPSQVKLMDIVSKKHPVD	+ + MQIRNLTSLTPAGEASLTWPVGINSPFLPKSRFEVISWDYFTEQHLFSCLDGSPKCELSGASKADVSDIIESALE LNS YQPLLRFSKRQLLNGYRRFDPTRGMEYTLDLLLEAVTQKGHSHVLVKRVSLVRPLSKVEIIPMPYVTEATRVQLVLPLTVQDLDFVSNFLDMYAMNTLDTHDNALLTLLFIYHPYDAQRVSQVDVFAGVKAMVGELEKRYAEVKIPWISVKTEVPSQVKLMDIVSKKHPVD
284166	Query_775	2-contig_20523_1	643	gi|34604128|gb|AAQ79777.1|Rho GTPase activating protein N/AflII-2 [Gallus gallus]	AAQ79777	992	1	668.692	1724	0	79	486	473	884	0	0	345	365	4	412	SKNVSKSEENLLTPKCRNEVVYRMSWNSPTVTDSQEISSNEGILQGNSSSESAFVFE--PVLPDEYRLTAEDQREDRLKLREEANNLTAETLLKVKEAFSASGSNLHHLRADTKSSLPGVIDETLKETLCLTGLGREKELVAEVSPSPVNLESRELFHQENQSYAIDKQQPKKDEIKALEKKSFLTSIEIELQVQKPDVRNVIELPVTQVLAREGDLTVQNSSSKDDLKKLDSFGGK-ELELMHSQTAENGTVKC	SKNVSKSEENLLTPKCRNKVVYRMSWNSPTVTDSQEISSNEGILPENSSSESAFIFEKPPVLPDECRLTAEEQQDSRLKLCEEANNLTAETLLKVKQAFSVSGSNLHNLRADTKSSFSGVTDETLKETPCLTGLSPEKELVAGASCSPAKVESRELFHQQCQSYATDKQQPKKDEIKTLEKKSFRTSIEIELQIQKPDIRNVIELPVTQVLAREDNLTVQNSSSKDDLKNLDSFGRKEEVELTHSQTAENGTVHC	SKNVSKSEENLLTPKCRN+VVYRMSWNSPTVTDSQEISSNEGIL NSSSESAF+FE PVLPDE RLTAE+Q++ RLKL EEANNLTAETLLKVK+AFS SGSNLH+LRADTKSS GV DETLKET CLTGL EKELVA S SP +ESRELFHQ+ QSYA DKQQPKKDEIK LEKKSF TSIEIELQ+QKPD+RNVIELPVTQVLARE +LTVQNSSSKDDLK LDSFG K E+EL HSQTAENGTV C
254674	Query_553	2-contig_4727_1	350	gi|363727380|ref|XP_414970.3|PREDICTED: smoothened homolog [Gallus gallus]	XP_414970	725	1	638.262	1645	0	16	338	12	322	0	0	308	310	12	323	LRNAPRCWDVIQPLLCAVYMPKCEDGQVELPSQTLCQATRAPCTIVERERGWPDFLKCTPDRFPEGCPNEVQNIKFNSSGQCEAPLVRTDNPKSWYEDVEGCGIQCQNPLFTEMEHREMHVYIAAFSSVTIFCTFFTLATFVADWRNSNRYPAVILFYINACFFVGSIGWLAQFMDGARDEIVCRADGTMRLGEPTSNETLSCVIIFVIVYYSLMSGVIWFVMLTYAWHTSFKALGTTYQPLLGKTSYFHLITWS	LRNAPRCWDVIQPLLCAVYMPKCEDGQVELPSQTLCQATRAPCTIVERERGWPDFLKCTPDRFPEGCPNEVQNIKFNSSGQCEAPLVRTDNPKSWYEDVEGCGIQCQNPLFTETEHREMHVYIAAFSSVTIFCTFFTLATFVADWRNSNRYPAVILFYVNACFFVGSIGWLAQFMDGARDEIVCRADGTMRLGEPTSNETLSCVIIFVIVYYSLMSGVIWFVMLTYAWHTSFKALGTTYQPLLGKTSYFHLITWS	LRNAPRCWDVIQPLLCAVYMPKCEDGQVELPSQTLCQATRAPCTIVERERGWPDFLKCTPDRFPEGCPNEVQNIKFNSSGQCEAPLVRTDNPKSWYEDVEGCGIQCQNPLFTE EHREMHVYIAAFSSVTIFCTFFTLATFVADWRNSNRYPAVILFY+NACFFVGSIGWLAQFMDGARDEIVCRADGTMRLGEPTSNETLSCVIIFVIVYYSLMSGVIWFVMLTYAWHTSFKALGTTYQPLLGKTSYFHLITWS
50610	Query_357	40-contig_2246_1	3540	gi|363727494|ref|XP_423746.3|PREDICTED: cadherin EGF LAG seven-pass G-type receptor 1 [Gallus gallus]	XP_423746	2864	1	1284.63	3323	0	1019	1968	31	1014	0	0	639	789	34	984	PPRAAP-------QSPPRG-------------RRAAPNRHPLFPQYNYQAEVAENQPAGTAVVAVAAQDPDGGEAGRLVYSMDALMNSRSLELFSIDPRAGLISTTRALDRESMELHYFRVTAADHGAPRL-SATTMVAIAVADRNDHDPVFEQSEYRETIRENVEEGYPILQLRATDVDSPPNANIRYRFVNERAAHAVFEIDPRSGLITTSGPVDREKMERYSLVVEANDQGREPGPRSATVRVYITVLDEND	PPRAAPLLHLPPGAAPRRGAAEPPGDGRRAARRARSPNSPPQFQLPSYQVSIPENEPAGTAVIVLRAQDPDEGEAGRLAYSMEALFDERSNDYFSIDPQTGGVVTARSLDRETKDTHVLKVTASDHGSPRRRSATTYLTVTVSDTNDHEPVFEQPEYRESIRENLEVGYEVLTIRATDGDAPANANMLYRLLEPGAGDGVFEIDPRSGVVRTRAPVDREEVSEYHLVVEANDQGKDPGPRSATAMVHITVEDEND	PPRAAP +P RG R +PN P F +YQ + EN+PAGTAV+ + AQDPD GEAGRL YSM+AL + RS + FSIDP+ G + T R+LDRE+ + H +VTA+DHG+PR SATT + + V+D NDH+PVFEQ EYRE+IREN+E GY +L +RATD D+P NAN+ YR + A VFEIDPRSG++ T PVDRE++ Y LVVEANDQG++PGPRSAT V+ITV DEND
301907	Query_471	23-contig_685_1	1840	gi|363727494|ref|XP_423746.3|PREDICTED: cadherin EGF LAG seven-pass G-type receptor 1 [Gallus gallus]	XP_423746	2864	1	1877.45	4862	0	816	1815	33	1035	0	0	964	975	15	1009	RAAPE---PRGAA----CAVPDGDGRRAARRARSPNSPPQFQLPSYQVSIPENEPAGTAVIVLRAQDPDEGEAGRLAYSMEALFDERSNDYFSIDPQTGSVVTARSLDRETKDTHVLKVTASDHGSPRRRSATTYLTVTVSDTNDHEPVFEQPEYRESIRENLEVGYEVLTIRATDGDAPANANMLYRLLEPGAGDGVFEIDPRSGVVRTRAPVDREEVSDYHLVVEANDQGKDPGPRSATAMVHITVEDENDNY	RAAPLLHLPPGAAPRRGAAEPPGDGRRAARRARSPNSPPQFQLPSYQVSIPENEPAGTAVIVLRAQDPDEGEAGRLAYSMEALFDERSNDYFSIDPQTGGVVTARSLDRETKDTHVLKVTASDHGSPRRRSATTYLTVTVSDTNDHEPVFEQPEYRESIRENLEVGYEVLTIRATDGDAPANANMLYRLLEPGAGDGVFEIDPRSGVVRTRAPVDREEVSEYHLVVEANDQGKDPGPRSATAMVHITVEDENDNY	RAAP P GAA A P GDGRRAARRARSPNSPPQFQLPSYQVSIPENEPAGTAVIVLRAQDPDEGEAGRLAYSMEALFDERSNDYFSIDPQTG VVTARSLDRETKDTHVLKVTASDHGSPRRRSATTYLTVTVSDTNDHEPVFEQPEYRESIRENLEVGYEVLTIRATDGDAPANANMLYRLLEPGAGDGVFEIDPRSGVVRTRAPVDREEVS+YHLVVEANDQGKDPGPRSATAMVHITVEDENDNY
27981	Query_996	13-contig_5801_1	848	gi|363727522|ref|XP_001232991.2|PREDICTED: gamma-tubulin complex component 6-like [Gallus gallus]	XP_001232991	1723	1	911.753	2355	0	146	838	663	1260	0	0	486	523	101	696	DLRMEIAKQELIVHARETASKPLTVSCDGIWSVCVFHWVCSHPCCNTDRQISERMALDAKKLSEAERAICERPRGISVLSVKNFLQMCASQLALRKRRQVYLSSLPKLLKASGKNVSFCSCISSFQTLLYRGNDECRIQSRS-LGSTDFKLSDDAARREQRALWKIQRHKLETARLKSETYRENLVFDALKTLGFEMLEKLPDGSYRRKLDIVPYKQCQLALDRNTAVEDPHSQMFRVSLRGIHFIKISCGSSLS	DLRMEIAKQELIVHARETASKVLQAI--------------------NDRQKSERLALDAKKREQ--------------------FQKLKEQFAKDQERRLAIKQ-----EEIDDDFSYARELREREKRLKALEEELEKKARQELIDHYSKLSDDAARREQRALWKIQRHKLETARLK-------FLFEDQKRIE-EMLEKLPDGSYRRKLDIIPYKQCQLALDRNTAVEDPHSQ---------------------	DLRMEIAKQELIVHARETASK L DRQ SER+ALDAKK + Q Q A + R++ + + + S+ + + L +E ++R L KLSDDAARREQRALWKIQRHKLETARLK +F+ K + EMLEKLPDGSYRRKLDI+PYKQCQLALDRNTAVEDPHSQ
227160	Query_500	2-contig_2100_1	826	gi|363727554|ref|XP_423623.3|PREDICTED: plexin-B2 [Gallus gallus]	XP_423623	1840	1	1418.68	3671	0	1	802	973	1806	0	0	728	744	34	835	MHYGETKIVVPVQFSYSENPTVTKFKPVNSFSSGGRNITVTGTGFELIQSFSLMVHAEHLEAGKLNSKMFIGNCVTRLNETTVIFSSLPILEDPENYNITTIILMDHYQLVVKNESHSFTYVADPTFENFTDGIKKQVNKLINAKGSNLNKAMTIDEAQAFVGDEPCNIKTLTETDLYCEPPEVQPQPKKRQKRDMINNLPEFIVKFGLREWVLGRVEYDTRVSDIPLNLILPLVLIPMIAIIIISIICYRRKSQ	MHYGGTKIVVPVHFSYSENPTVTKFKPINSFSSGGRNITVTGTGFELIQSFSLMVHAERPEAGKLSSKTFVGNCVTRLNETTVVFSSLPVLEDPENYNITTIILMDHYQLVVKNESHSFTYVADPTFENFTDGIKKQVNKLINAKGSNLNKAMTIDEAQAFVGDEPCNIKTLTETDLYCEPPEVQPQPKKRQKRDMINNLPEFIVKFGLREWVLGRVEYDTRVSDIPLNLILPLVLIPMIAIIIISIICYRRKSQ	MHYG TKIVVPV FSYSENPTVTKFKP+NSFSSGGRNITVTGTGFELIQSFSLMVHAE EAGKL+SK F+GNCVTRLNETTV+FSSLP+LEDPENYNITTIILMDHYQLVVKNESHSFTYVADPTFENFTDGIKKQVNKLINAKGSNLNKAMTIDEAQAFVGDEPCNIKTLTETDLYCEPPEVQPQPKKRQKRDMINNLPEFIVKFGLREWVLGRVEYDTRVSDIPLNLILPLVLIPMIAIIIISIICYRRKSQ
17719	Query_289	23-contig_31450_1	424	gi|363727569|ref|XP_416078.3|PREDICTED: cullin-associated NEDD8-dissociated protein 1 isoform 2 [Gallus gallus]	XP_416078	1206	1	771.926	1992	0	20	401	466	847	0	0	382	382	0	382	SSNLKIDALSCLYVILCNHSPQVFHPHVQALVPPVVACVGDPFYKITSEALLVTQQLVKVIRPLDQPSSFDATPYIKDLFTCTIKRLKAADIDQEVKERAISCMGQIICSLGDSLGTDLPSTLQIFLERLKNEITRLTTVKAMTLIAGSPLKIDLRPILGEGVPILASFLRKNQRALKLGTLSALDILIKNYSDSLTAAMIDAVLDELPPLISESDMHVSQMAISFLTTLAKVYPSSLSKISGSILNELIGLVRS	SSNLKIDALSCLYVILCNHSPQVFHPHVQALVPPVVACVGDPFYKITSEALLVTQQLVKVIRPLDQPSSFDATPYIKDLFTCTIKRLKAADIDQEVKERAISCMGQIICSLGDSLGTDLPSTLQIFLERLKNEITRLTTVKAMTLIAGSPLKIDLRPILGEGVPILASFLRKNQRALKLGTLSALDILIKNYSDSLTAAMIDAVLDELPPLISESDMHVSQMAISFLTTLAKVYPSSLSKISGSILNELIGLVRS	SSNLKIDALSCLYVILCNHSPQVFHPHVQALVPPVVACVGDPFYKITSEALLVTQQLVKVIRPLDQPSSFDATPYIKDLFTCTIKRLKAADIDQEVKERAISCMGQIICSLGDSLGTDLPSTLQIFLERLKNEITRLTTVKAMTLIAGSPLKIDLRPILGEGVPILASFLRKNQRALKLGTLSALDILIKNYSDSLTAAMIDAVLDELPPLISESDMHVSQMAISFLTTLAKVYPSSLSKISGSILNELIGLVRS
333320	Query_561	11-contig_19589_1	1826	gi|363727715|ref|XP_416172.3|PREDICTED: growth arrest-specific 2 like 3 [Gallus gallus]	XP_416172	726	1	784.252	2024	0	872	1334	257	724	0	0	412	428	5	468	QMLHGKHVMVRVGGGWDTLQGFLLKYDPCRVLQFATLEQKILAFQKGVTSDNVSNSPARIQEPPVMNPMSAVNMFQKQPSNPPTPVPALKTFHGATAKKPLSKCAQSPALTSPKVPVHQSSAAKLLSARPKLTDAKSPFRPLMGTSKKLESPALHSPASAPSLPASKSSSSTRSRTALVHSETLRKRIRSPDAPKVRFAPAQCSPGTGMHSAVSTSKKQLSQLPATAESLASKQKCVPSKSKPVSVTKTKVNSVA	RMLHGKHVMVRVGGGWDTLQGFLLKYDPCRVLQFATLEQKILAFQKGVTSDNISNSPARIQEPPVMNPMSAVNMFQKQPANPPTPVPALKAIHGATAKKPLSKHPQSPALTSPKVPVHASSTAKLLSARPKLTDAQSPFKPLTGTSKKLASPACHSPAPVPSLPASKSSSSTRSRTALVHSETLRKRIRSPDAPKVRFAPAQGSPATGMHSALSASKKQLSQLPATAETLASKQKCVPSKSKPASVTKTKANAVA	+MLHGKHVMVRVGGGWDTLQGFLLKYDPCRVLQFATLEQKILAFQKGVTSDN+SNSPARIQEPPVMNPMSAVNMFQKQP+NPPTPVPALK HGATAKKPLSK QSPALTSPKVPVH SS AKLLSARPKLTDA+SPF+PL GTSKKL SPA HSPA PSLPASKSSSSTRSRTALVHSETLRKRIRSPDAPKVRFAPAQ SP TGMHSA+S SKKQLSQLPATAE+LASKQKCVPSKSKP SVTKTK N+VA
190860	Query_215	22-contig_9994_1	1610	gi|363727801|ref|XP_001233888.2|PREDICTED: histone acetyltransferase p300 isoform 1 [Gallus gallus]	XP_001233888	2446	1	996.882	2576	0	591	1368	1624	2384	0	0	696	710	29	784	PSFEEAALFVPCLLFEIRKDRDFFSLAESHQSCYSS-----YMHLCKFQTPLRTHMLSLAIFAWKSLGVNVQ-RWHDISCSLHGVTGTLITLPLLSFQDYDLCITCYNTKNHDHKMEKLGLGLDDESNNQQTATTQSPGDSRRLSIQRCIQSLVHACQCRNANCSLPSCQKMKRVVQHTKGCKRKTNGGCPICKQLIALCCYHAKHCQENKCPVPFCLNIKHKLRQQQLQHRLQQAQMLRRRMASMQRTGVVGQQ	PPIVEPDPLIPCDLMDGRDA--FLTLARDKHLEFSSLRRAQWSTMCML-VELHTQSQDRFVYTCNECKHHVETRWHCTVC-----------------EDYDLCITCYNTKNHDHKMEKLGLGLDDESNNQQTATTQSPGDSRRLSIQRCIQSLVHACQCRNANCSLPSCQKMKRVVQHTKGCKRKTNGGCPICKQLIALCCYHAKHCQENKCPVPFCLNIKHKLRQQQLQHRLQQAQMLRRRMASMQRTGVVGQQ	P E +PC L + R F +LA +SS + +C L T ++ +V+ RWH C +DYDLCITCYNTKNHDHKMEKLGLGLDDESNNQQTATTQSPGDSRRLSIQRCIQSLVHACQCRNANCSLPSCQKMKRVVQHTKGCKRKTNGGCPICKQLIALCCYHAKHCQENKCPVPFCLNIKHKLRQQQLQHRLQQAQMLRRRMASMQRTGVVGQQ
351998	Query_584	26-contig_14050_1	1278	gi|363728089|ref|XP_003640459.1|PREDICTED: UPF0606 protein KIAA1549-like [Gallus gallus]	XP_003640459	1903	1	1334.32	3452	0	254	1119	8	870	0	0	730	773	7	868	DEISLEQQNFSFFSMDSKVHQSISGSRTQMALAKSTLESQESNFLQTLLSSVTTPIDVTLFNQEETVRISEGRSTPLIDFSVTSNEAFLSDDEFISPFPKAQWTPPLKSFAVLTDHHSANTVEPPRETLEAPLLTPSLSIFSSPYDILRTAQQKTPLSAALDRSTTLTDLELFIPDSGILTASRHSLLHPPDTGIYFTPVPSEEVDAMWENMNRSVTSLPSGATSEGAPIHLKLLGENSHAAPGATAQSVDPNGD	DEMSSEQRNFSFFSMDSKVHQSISGSRTQMALAKSTLESQESHFLQTLLSSVTTPIDATSFNQEETARTSEGKSTPLIDFSITSNEAFLSDDKFISPFPKVQWTPPLKSFAILTDHHSDNTVEAPRETLETPLLTPSLSIFSSPYDILGTAQQKTPLSAVLDYSTSLTELEPFVPDSGILTASRHLPLYPPDTGIYFTPVPSEEVDAMWENINRSVTSLPSGATSEGSPVHLKLLGENSHAAAGATARS----GD	DE+S EQ+NFSFFSMDSKVHQSISGSRTQMALAKSTLESQES+FLQTLLSSVTTPID T FNQEET R SEG+STPLIDFS+TSNEAFLSDD+FISPFPK QWTPPLKSFA+LTDHHS NTVE PRETLE PLLTPSLSIFSSPYDIL TAQQKTPLSA LD ST+LT+LE F+PDSGILTASRH L+PPDTGIYFTPVPSEEVDAMWEN+NRSVTSLPSGATSEG+P+HLKLLGENSHAA GATA+S GD
110367	Query_974	25-contig_1594_1	927	gi|363728135|ref|XP_001235131.2|PREDICTED: LOW QUALITY PROTEIN: serine/threonine-protein kinase WNK1 [Gallus gallus]	XP_001235131	2879	1	834.713	2155	0	229	833	1719	2244	0	0	493	507	79	605	QKLEFKQPDPTSSMPQRIGKSFLPFSISADGCCQVFILYDGVHIPYCRLCILLQLRVTKYLTSFCLGVPPSSFTQVVHSAGRRFISNRAFSPLLFLEEKKRQMWVNMFFKTEVIPGSREMTVLIRMVLCRILAGKNLTTDQWEYFAASPLHGPGMNLSHSASSLSLQQAFSEIGHGQMTEGPSTAPPVFNQTMPPFPPALSTMASSGAPPASVAAPSISVPSSTGVSLPSSVTLPSENAAVGVAPSASVPSSVSP	QKLEFKQPDPTSSMPQRI------------------------------------------------GVPPSSFTQVVHSAGRRFI----VSPV-----PESRLKEQGFF-TSPIPGGKETSDVV---------------------AASPLHGPGMNLSHSASSLSLQQAFSEIGHGQMTEGPSTAPPVFNQTIPPFPPALSTMASSGAPPASVAAPSISIPSSTGVSLPSSVTLSSENAAVGVAPSASVPSSVSP	QKLEFKQPDPTSSMPQRI GVPPSSFTQVVHSAGRRFI SP+ + ++ FF T IPG +E + ++ AASPLHGPGMNLSHSASSLSLQQAFSEIGHGQMTEGPSTAPPVFNQT+PPFPPALSTMASSGAPPASVAAPSIS+PSSTGVSLPSSVTL SENAAVGVAPSASVPSSVSP
359507	Query_895	17-contig_1594_1	478	gi|363728135|ref|XP_001235131.2|PREDICTED: LOW QUALITY PROTEIN: serine/threonine-protein kinase WNK1 [Gallus gallus]	XP_001235131	2879	1	825.083	2130	0	13	419	806	1212	0	0	399	400	0	407	PQHPRGGTPTFPDSQIFFPTVHERPVSFSPPPVCPPKVAVAQRRKSTSFLEAQTCHFQPLLKTGQSLVPPGGSPTNWTPEALIMLGTTSHRVAGEPLHVQVNPVFEPAPVHSDYRSGPTPPEDAHYRMHPEAVYLVGMHYPSQVSEQYDQVAYNSHVTEQHLNQVSESKHVQGGPPQSSVFDYQSGQAFLARHVQNLRLDAGLSPLSPLSSVSAPLSADPAQMTFHQVFVPHSAPAVLSHSGDGRTSCVFEFHVH	PQHPRGGTPTFPDSQIFFPTVHERPVSFSPPPVCPPKVAVAQRRKSTSFLEAQTCHFQPLLKTGQSLVPPGGSPTNWTPEALVMLGTTSHRVAGEPLHVQVNPVFEPAPVHSDYRSGPTPPEDAHYRMHPEAVYLVGMHYPSQVSEQYDQVAYNSHVTEQHLKQVSESKHVQGGPPQSSVFDYQSGQAFLARHVQNLRLDAGLSPLSPLSSVSAPLSADPAQMTFHQVFVPHSAPAVLSHSGDGRTSCVFEFHVH	PQHPRGGTPTFPDSQIFFPTVHERPVSFSPPPVCPPKVAVAQRRKSTSFLEAQTCHFQPLLKTGQSLVPPGGSPTNWTPEAL+MLGTTSHRVAGEPLHVQVNPVFEPAPVHSDYRSGPTPPEDAHYRMHPEAVYLVGMHYPSQVSEQYDQVAYNSHVTEQHL QVSESKHVQGGPPQSSVFDYQSGQAFLARHVQNLRLDAGLSPLSPLSSVSAPLSADPAQMTFHQVFVPHSAPAVLSHSGDGRTSCVFEFHVH
346793	Query_1008	9-contig_2093_1	4320	gi|363728274|ref|XP_425518.3|PREDICTED: atrophin-1 [Gallus gallus]	XP_425518	1201	1	795.808	2054	0	1059	1655	95	690	0	0	568	571	1	597	EDEIEKSHNFSFLSLLQELPCPPSPSDVDSLDGHSFNDEMSSDPRDIDQDNRSTSPSVYSPGSVENDSDSSSVLSQGPSLSYHHPPLFPQSPPVAPTSDSLARPPEPGFSLPGETHPQGPTAGGYHSQLEGQASRIFQAPAPQTPTSSSSAVATTSAPSSSSSSSSSTSTHAPLYPTPNVVQVGSKITGGAGGLSAPGGREQTLSAKHNPPPTTPISLASVVGGLPPQKTSPANAPPAPPASTPSFPHVSANLPP	ESEGEDS-NAPKKTKTEELPCPPSPSDVDSLDGHSFNDEMSSDPRDIDQDNRSTSPSVYSPGSVENDSDSSSVLSQGPSLSYHHPPLFPQSPPVAPTSDSLARPPEPGFSLPGEAHPQGPTAGGYHSQLEGQTSRIFQAPAPQTPASSSSAVATTSAPCSSSSSSSSTSTHAPLYPTANVVQVGSKIAGGAGGLSAPGNREQTLSAKHNPPPTTPISLASVVGGLPPQKTSPANPPPAPPASAPSFPHVSANLPP	E E E S N + +ELPCPPSPSDVDSLDGHSFNDEMSSDPRDIDQDNRSTSPSVYSPGSVENDSDSSSVLSQGPSLSYHHPPLFPQSPPVAPTSDSLARPPEPGFSLPGE HPQGPTAGGYHSQLEGQ SRIFQAPAPQTP SSSSAVATTSAP SSSSSSSSTSTHAPLYPT NVVQVGSKI GGAGGLSAPG REQTLSAKHNPPPTTPISLASVVGGLPPQKTSPAN PPAPPAS PSFPHVSANLPP
84270	Query_706	9-contig_17665_1	1570	gi|363728424|ref|XP_416549.3|PREDICTED: DNA polymerase theta [Gallus gallus]	XP_416549	2613	1	1559.66	4037	0	11	1018	850	1855	0	0	804	871	8	1011	SSRRAVDEDEESAEERRTVRSIWMAGMKGLTEGEAASLIVEEARGLLQQDLAAMGVQWNPESFLEADTSSVISSESEMEDRLRKPDGELSSESSVMLNKKECGVQNHKGLGSQAGNLSNIKKGYKRWLSSSTSNSRFESEVTYRKQAQAEERNDDTEHSARKRPNMSRDNENVEGILKAKNKADSKRASPELHTEQGKTPTLDKMSSAFRLLRSADTHLNRTRSKKTSSKLQKSLLEDSSMFVMDIKKSSAFLPS	SGRRAVDEDEESVEERRTVRSIWMAGMKGLTESEAASLIVEEARELLHQDLAAMGVQWNPESFLETSSMI--SSESEMEDRLHKPDGELSSESSVMLNKKECRVQNHKGLGSQAGNLSNIKKGYKRRLSSSTASSRFESEVIYRKQAQADERNDDTVHSARKQPNMSRGNENVKGILKVENKADSERASPEVHTEQGKTPTLAKMSSASRLLRSEDTRLNQTRNKNTSSKLQKSLLEDSSMVIMDIKKPSAFLPS	S RRAVDEDEES EERRTVRSIWMAGMKGLTE EAASLIVEEAR LL QDLAAMGVQWNPESFLE + SSESEMEDRL KPDGELSSESSVMLNKKEC VQNHKGLGSQAGNLSNIKKGYKR LSSST++SRFESEV YRKQAQA+ERNDDT HSARK+PNMSR NENV+GILK +NKADS+RASPE+HTEQGKTPTL KMSSA RLLRS DT LN+TR+K TSSKLQKSLLEDSSM +MDIKK SAFLPS
56723	Query_956	1-contig_36475_1	421	gi|363728468|ref|XP_003640506.1|PREDICTED: putative protein FAM172B-like isoform 1 [Gallus gallus]	XP_003640506	373	1	672.544	1734	0	63	420	16	373	0	0	316	334	0	358	YTLQYCWLQTGHGLSLRKLVEGSDYQEELRYDFNAKGELRHLDTNESFVFNYYKNNHERNHERYQVLGHVITQYVYELLERACTLQKVYIPSDATEDEPRSFFFMSEKALTSSSSIIVLLQDRGVFRAGQWGQKTIISEGLYHGTQIPFIKMALQSHGGVIVLNPNDNFVDLKTEREKLSFSTRGESPASMHSCQCNPRWCSTSPEEHTMYVWDHFISKSAAKNVAFIAHGYGGLVFIDLLMQRKEEVMNKVFSV	FTGAHTWLQEGHELSLRKLVEGSDYQEELKYDFNVKGELRHLDTNESFVFNYYKNTHEKNHERYQVLGHMITQYVYELLERVCALQKVYIPSDATEDEPRSFFFMSEKALTSSSSIIVLLQDRGVFRAGQWGRKTIISEGLYHGTQIPFIKMALQRHGGVIVLNPNDNLVDLKTEREKLSFSTREESPTSLHSCQSIPRQCNSSPEEHTMYVWDHFISKSAAKNVAFIAHGYGGLVFTDLLVQRKWEVMNKVFSV	+T + WLQ GH LSLRKLVEGSDYQEEL+YDFN KGELRHLDTNESFVFNYYKN HE+NHERYQVLGH+ITQYVYELLER C LQKVYIPSDATEDEPRSFFFMSEKALTSSSSIIVLLQDRGVFRAGQWG+KTIISEGLYHGTQIPFIKMALQ HGGVIVLNPNDN VDLKTEREKLSFSTR ESP S+HSCQ PR C++SPEEHTMYVWDHFISKSAAKNVAFIAHGYGGLVF DLL+QRK EVMNKVFSV
297373	Query_568	4-contig_36475_1	484	gi|363728479|ref|XP_416613.2|PREDICTED: mitochondrial ribonuclease P protein 1 isoform 3 [Gallus gallus]	XP_416613	414	1	793.112	2047	0	70	483	1	414	0	0	375	396	0	414	MQTANMLLKKFVRCSAFSFSIQHGVKRDLFPLSRALILSPCLKEANSRSYSEKVDLDAWKEVMKSGLPEVSETVSEPKEPSSLAAARETLEMWRLAGRPVPEKLSEEQLKAFMECPSKSAKKKYLKYLHLKELYKKNDKRKMDEKREKRLETRERASEAEEPKRNPFVCLWASSMDKMYSWRVAQSMIFGQPLVFDMSYEKYMSVREVANAVRQIVLSEGCNRRSVDPFHIHFCNLKDDSLYHKEFIKHYRGAWD	MQAANMLLKKIVRCSAFSFPIQRGMKQDLFPLSRTLILSPCLKEDNSRSSSEKVDLDAWKEVMKSGLQEVSQTVSEPKELSTLAAARETLELWRLVGRPVPENISEEQLKAFMECPSKSAKKKYLKYLHLKELYKKNSKRKMDEKRERRLETQERASETQEPKKNPFVCLWSSVMDKTYNWRVAQSMIFGQPLVFDMSYERYMSVREVANAVRQIVLSEGCNRRSVDPFHIHFCNFKDDSLYHKEFIKHYRGAWD	MQ ANMLLKK VRCSAFSF IQ G+K+DLFPLSR LILSPCLKE NSRS SEKVDLDAWKEVMKSGL EVS+TVSEPKE S+LAAARETLE+WRL GRPVPE +SEEQLKAFMECPSKSAKKKYLKYLHLKELYKKN KRKMDEKRE+RLET+ERASE +EPK+NPFVCLW+S MDK Y+WRVAQSMIFGQPLVFDMSYE+YMSVREVANAVRQIVLSEGCNRRSVDPFHIHFCN KDDSLYHKEFIKHYRGAWD
273682	Query_1057	2-contig_26418_1	1107	gi|363728556|ref|XP_003640516.1|PREDICTED: filamin A interacting protein 1-like [Gallus gallus]	XP_003640516	1132	1	1783.85	4619	0	84	1001	209	1126	0	0	894	904	0	918	LKRLLEQETAYQEKKEKENNKKIAKLKEELTKLKSFALMVVDEQQRLTEQLNQQSQKIQELTASADQAHEKLAFAEAKAQEQEQKASRLEAELQVQSSKVSQDQEAMMAKLTNEDSQNRQLRLKLNALSRQIDELEETNKSLRKAEDELQDLRDKINKGEYGNSTLMSEVEELRKRLLEMEGKDEELIKMEDQCRELNKKLEKEASQSKNLKGEVDKLNKRIMDLEKLEDAFNKSKQECYSLKCNLEREKMVTKQ	LKKLLEQETAYQEKKEKENNKKIAKLKEELTKLKSFALMVVDEQQRLTEQLNQQSQTIQELTTSADQAHEKLAFAEAKAQEQEQKASRLEAELQVQSSKVSQDQEAMMAKLTNEDSQNRQLRLKLNALSRQIDELEETNKSLRKAEDELQDLRDKINKGEYGNSTLMSEVEELRKRLLEMEGKDEELIKMEDQCRELNKKLEKEASQSKNLKGEVDKLNKRIMELEKLEDAFNKSKQECYSLKCNLEREKMVTKQ	LK+LLEQETAYQEKKEKENNKKIAKLKEELTKLKSFALMVVDEQQRLTEQLNQQSQ IQELT SADQAHEKLAFAEAKAQEQEQKASRLEAELQVQSSKVSQDQEAMMAKLTNEDSQNRQLRLKLNALSRQIDELEETNKSLRKAEDELQDLRDKINKGEYGNSTLMSEVEELRKRLLEMEGKDEELIKMEDQCRELNKKLEKEASQSKNLKGEVDKLNKRIM+LEKLEDAFNKSKQECYSLKCNLEREKMVTKQ
244107	Query_202	9-contig_33376_1	2078	gi|363728583|ref|XP_003640520.1|PREDICTED: uncharacterized protein LOC418437 [Gallus gallus]	XP_003640520	2086	1	1922.13	4978	0	808	2048	1	1245	0	0	987	1070	18	1252	IDNHSEITSNVQMLHSSTILQQQADERTGCANKDGDLRKSDAQKMVAAAEREQNPQNFLARVLLPVNEQTRTSLSVESRGEECVATGNLTASKLTIESDEDPVMDQVTCNEELNALGKPMPVRNEHQLNPVENSKDTATPQPGLYCLEKMKVMSEVAVENFAHGLCTHGYENMKSNLDELTAPLSVSFESSFETGDCYSASLHPNYKSVNKNIVKREVGSKDKSDAVSTPDLECERSTSLEPIDMSLSENSVPTS	MNNHSELTSNVQVHHSNTTFQQQADEHKGSANKDSDPRKSDAQKIVAAAEKEQNPQNFLATVLSPFKKQTCTSLSVESRGEECIATGNLTASKLAVKNGKDTVVDQVTCNEELNELGKPMHIQNEHQLNLVENSKDTATPQPGLSCLEKMKVLSEVAVESFADVSRTRECDNVKSNLDELTATLSVSFESSFETGDCYSASLHPDCKSVSKTIVKRGVGSKDKRDAVSTPDLEYEKSKSFETVDMSLSENSIPTH	++NHSE+TSNVQ+ HS+T QQQADE G ANKD D RKSDAQK+VAAAE+EQNPQNFLA VL P +QT TSLSVESRGEEC+ATGNLTASKL +++ +D V+DQVTCNEELN LGKPM ++NEHQLN VENSKDTATPQPGL CLEKMKV+SEVAVE+FA T +N+KSNLDELTA LSVSFESSFETGDCYSASLHP+ KSV+K IVKR VGSKDK DAVSTPDLE E+S S E +DMSLSENS+PT
219250	Query_363	2-contig_15833_1	531	gi|363728776|ref|XP_003640553.1|PREDICTED: trafficking protein particle complex subunit 10 [Gallus gallus]	XP_003640553	1267	1	984.171	2543	0	10	531	223	754	0	0	488	493	44	549	PGKSL--FLMARLSELAFVFEMLQQFEDALVQYDELDALFSQYVVNFGAGD-------------------------MEKRELIQNQEATLLDLRSYLFSRQCTLLIFLQRPWEVSQRALELLHNCVQELKLLEVSVPPGALDCWVFLSCLEVLQRIEGCCDRAQIDANVSHTVGLWSYATEKLKSLGYLCGLVSEKGPNSEDLNRTVDLLAGLGAERPETANASQSPYKKLKEALSSVEAFEKHYLDLSHATIEM	PGWSFCEYFMVQ-EELAFVFEMLQQFEDALVQYDELDALFSQYVVNFGAGDGANWLTFFCQPVRSWNGLILRKPIDMEKRELIQNQEATLLDLRSYLFSRQCTLLIFLQRPWEVSQRALELLHNCVQELKLLEVSVPPGALDCWVFLSCLEVLQRIEGCCDRAQIDANVSHTVGLWSYATEKLKSLGYLCGLVSEKGPNSEDLNRTVDLLAGLGAERPETANASQSPYKKLKEALSSVEAFEKHYLDLSHATIEM	PG S + M + ELAFVFEMLQQFEDALVQYDELDALFSQYVVNFGAGD MEKRELIQNQEATLLDLRSYLFSRQCTLLIFLQRPWEVSQRALELLHNCVQELKLLEVSVPPGALDCWVFLSCLEVLQRIEGCCDRAQIDANVSHTVGLWSYATEKLKSLGYLCGLVSEKGPNSEDLNRTVDLLAGLGAERPETANASQSPYKKLKEALSSVEAFEKHYLDLSHATIEM
170345	Query_614	1-contig_9180_1	553	gi|363728865|ref|XP_416730.3|PREDICTED: bromodomain and WD repeat-containing protein 1 [Gallus gallus]	XP_416730	2301	1	772.696	1994	0	1	539	1310	1905	0	0	462	488	57	596	MKNGYDENCWKKQCMELVNLIFQCEDSEPFRQPVDLDQYPPCFLFLSFSIWYKTLMLLLE-----ILVQVCVSVCCITSQS--------------------------------LINSEDDFEKM---QDFSR---------------TRNLKQKPLKSQAKVESEQEDSFSQPTSSRAACVASHKTNASNYNHSSSGESSDSVCLASFERNGKARSTTLTNCSTLSSAESEVEGSLASSTSSSSSTSSSEESKES	MKNGYDENCWKKQCMELVNLIFQCEDSEPFRQPVDLDQYPDYRHIIDTPMDFGTVKETLEAGNYDTPMELCKDIRLIFSNAKSYTPNKKSKIYSMTLRLSALFEEKIRRIVSDFKNGQKQNEKIRRNQRYTRRVQSQSSAQHPTKMPSRNLKQKPLKSQAKIESEQEDSFSQPTSSRAACVASHKTNASNYNHSSSGESSDSACLASFERNGKARSTTLTNRSTLSSAESEVEGSLASSTSSSSSTEESSEESKE	MKNGYDENCWKKQCMELVNLIFQCEDSEPFRQPVDLDQYP + + + T+ LE +++C + I S + N + EK+ Q ++R +RNLKQKPLKSQAK+ESEQEDSFSQPTSSRAACVASHKTNASNYNHSSSGESSDS CLASFERNGKARSTTLTN STLSSAESEVEGSLASSTSSSSST S E +
245776	Query_400	10-contig_9877_1	1994	gi|363728934|ref|XP_416853.2|PREDICTED: matrix-remodeling-associated protein 5 [Gallus gallus]	XP_416853	2836	1	2768.42	7175	0	250	1912	237	1900	0	0	1440	1521	11	1669	GVLKCKKDKAYEGGQLCPRCNSPKQLQKEDIQNLKDISCRKPIIQSSLRHNSSTQDEEDGESYELPLEMFQSSPWNITLNMTDEHGNVVHLNCEIKKPTGSTKIQWSQIQTQEIDINATISLDFECPMNRENYEKLWKLIAYYSEVPVKLERELMLSKEPKISYRYKQGSDYDALYYTGVKAQILAEPSWVMQPLINIQLNRRQSTGKKVVLSFFTVFSQAIHTKDTRQQRSWVMIEQNQSTTKAQSVVEGSECH	GVLKCKKDKAYEGGQLCPRCHSPKQLQKEDIQNLKDISCRKPIIQSSLRHNSSTQDEEDGESYELPLEVFQSSPWNITLNMTDEHGNVVHLNCEIKKPTGSTKIQWNQIQTQEIDINATISLDFECPMNRENYEKLWKLIAYYSEVPVKLERELMLSKEPKISYRYKQGSDYDALYYTGVKAQILAEPSWVMQPLINIQLNRRQSTGKKVVLSFFTVFSQAIHTKDTRQQRSWIMIEQNQSTRKAQSVVEGSECQ	GVLKCKKDKAYEGGQLCPRC+SPKQLQKEDIQNLKDISCRKPIIQSSLRHNSSTQDEEDGESYELPLE+FQSSPWNITLNMTDEHGNVVHLNCEIKKPTGSTKIQW+QIQTQEIDINATISLDFECPMNRENYEKLWKLIAYYSEVPVKLERELMLSKEPKISYRYKQGSDYDALYYTGVKAQILAEPSWVMQPLINIQLNRRQSTGKKVVLSFFTVFSQAIHTKDTRQQRSW+MIEQNQST KAQSVVEGSEC
139684	Query_739	1-contig_23051_1	772	gi|363729033|ref|XP_416929.3|PREDICTED: LOW QUALITY PROTEIN: E3 SUMO-protein ligase RanBP2 [Gallus gallus]	XP_416929	3035	1	1033.86	2672	0	22	703	743	1521	0	0	539	593	103	782	LPVSMETVTEMLNTVIQELGENDEEEALASGNMSQAADLEVKRSVPSAKKLSFSPVNRYE----------------------------NEMREMKLILEQLRVSSHRWPAESYGTDTMSDSYQRAQSLPEAPLTTVATTGPSVYSSQPPADNSQSLLRTAATNVTPTKAP-----------------------------------------------APGILSPRGGDDSYNSGVPQANTNPPLPEPGYFTKPSV	LPVSIETVTEMLNTVIQELGGNEEGESLASRNIAQAAHLEVKHPIPSPKKLSFSPTNTYKFSPKTLPQWAEDHKSLLQMLCQQVEALKNEMQEMKLNSSSVSVSSHRWPAESYGTDTVSDGYQRAQNLHEAPLT-VATTGPSVYYSQSPAYNSQYLLRTAATNVTPTKAPVYGMNRLAPQQHIYAYQQPIHTPPLQNTSACVFPQDIYGTPLRFDAPAAGIISPRGADDYYNYGVPQASSNPPLPEPGYFTKPSV	LPVS+ETVTEMLNTVIQELG N+E E+LAS N++QAA LEVK +PS KKLSFSP N Y+ NEM+EMKL + VSSHRWPAESYGTDT+SD YQRAQ+L EAPLT VATTGPSVY SQ PA NSQ LLRTAATNVTPTKAP A GI+SPRG DD YN GVPQA++NPPLPEPGYFTKPSV
296065	Query_467	36-contig_14854_1	1431	gi|363729040|ref|XP_416932.3|PREDICTED: zinc finger protein 828 [Gallus gallus]	XP_416932	879	1	1568.13	4059	0	282	1210	1	861	0	0	801	820	70	930	MDMLQILRKTTERLECDHCSFRGTDYENIQIHMGTIHPEYCDEMDAAGLGKLIFYQKSAKLFHCHKCFFTSKMYCNVYYHITAQHAAPGKWNEERKGQVEGGSDSSKKNGAAEPQKSSPSPESLKPALSPEVPKSESKLQKSSVSPESQKSVQTSSSEPDKSAQITSSDSEKSVQAVSPDLERLVSAVSSDSEKSSPDASPDPQKQSPDASPDPQKPAPAVSPDPQKPAVAVSPEPRRHSPAVSPEPRRHSPAVS	MDMLQILRKTTERLECDHCSFRGTDYENIQIHMGTIHPEYCDEMDAAGLGKLIFYQKSAKLFHCHKCFFTSKMYCNVYYHITAQHAAPEKWNEERKGQVEGGSDSSKKNGAAEPQKCTPPPESLKPALSPEVPKPESKLQKSSVSPESQKSAQTSSSEPERSAQIMSPDSEKSVQAVSPDPEKLVSAVSSDSEKSSPDASPDPQKQSPDASPDPQKPAPAVSPDPQKPAV-----------AVSPEPRRHSPAVS	MDMLQILRKTTERLECDHCSFRGTDYENIQIHMGTIHPEYCDEMDAAGLGKLIFYQKSAKLFHCHKCFFTSKMYCNVYYHITAQHAAP KWNEERKGQVEGGSDSSKKNGAAEPQK +P PESLKPALSPEVPK ESKLQKSSVSPESQKS QTSSSEP++SAQI S DSEKSVQAVSPD E+LVSAVSSDSEKSSPDASPDPQKQSPDASPDPQKPAPAVSPDPQKPAV AVSPEPRRHSPAVS
[truncated: 37,440 more rows]

## Sheet: UniqueFilteredNuclearModels
Table S6-B Putative Annotation Models via GlimmerHMM and Blastx
All Hit Accessions ≤1E-04					Unique Hit Accessions ≤ 1E-04
gi|363743150|ref|XP_419232.3|PREDICTED: ligand-dependent nuclear receptor-interacting factor 1 [Gallus gallus]					gi|363743150|ref|XP_419232.3|PREDICTED: ligand-dependent nuclear receptor-interacting factor 1 [Gallus gallus]
[truncated: 37,850 more rows]

## Sheet: Mitochondrion
Supplemental Table S6-C Bobwhite Mitochondrion
Contig 140 in scaffolded assembly (NB1.1) and Contig 136 in simple de novo assembly (NB1.0)
[truncated: 235 more rows]

## Sheet: MHC_Summary
Supplemental Table S6-D Bobwhite MHC Summary
[truncated: 39 more rows]
