# Supplementary material for: A Draft De Novo Genome Assembly for the Northern Bobwhite (Colinus virginianus) Reveals Evidence for a Rapid Decline in Effective Population Size Beginning in the Late Pleistocene
Source: PLoS One. 2014 Mar 12;9(3):e90240. doi: 10.1371/journal.pone.0090240 (PMC3951200; doi:10.1371/journal.pone.0090240)
Supplement: Table S7 — Galgal4.71 cDNA Refseq Mappings onto NB1.1. (XLSX) [file pone.0090240.s007.xlsx]

## Sheet: Sheet1
Table S7 Galgal4.71 cDNA Refseq Mappings onto NB1.1
Galgal4.71ENSEMBL cDNA refseq ID	Northern Bobwhite Scaffolded Contig ID	Transcript Start Position in Scaffold	Gene ID (HUGO where possible)
ENSGALT00000001454	NorthernBobwhite_ScaffoldedDeNovo_contig_597	33347	1-ACYL-SN-GLYCEROL-3-PHOSPHATE ACYLTRANSFERASE ALPHA-LIKE
ENSGALT00000012985	NorthernBobwhite_ScaffoldedDeNovo_contig_3057	3968	1-AMINOCYCLOPROPANE-1-CARBOXYLATE SYNHASE-LIKE PROTEIN 2
ENSGALT00000007477	NorthernBobwhite_ScaffoldedDeNovo_contig_104	80213	2F2-2S FERREDOXIN-TYPE DOMAIN
ENSGALT00000008982	NorthernBobwhite_ScaffoldedDeNovo_contig_15396	14353	2-HYDROXYACYLSPHINGOSINE 1-BETA-GALACTOSYLTRANSFERASE-LIKE
ENSGALT00000012082	NorthernBobwhite_ScaffoldedDeNovo_contig_2484	17261	39S RIBOSOMAL L28 MITOCHONDRIAL PRECURSOR L28MT MRP L28
ENSGALT00000029609	NorthernBobwhite_ScaffoldedDeNovo_contig_127453	295	3-HYDROXYACL-COA DEHYDROGENASE TYPE-2
ENSGALT00000043898	NorthernBobwhite_ScaffoldedDeNovo_contig_66172	42	3-HYDROXYACYL-COA DEHYDROGENASE TYPE-2-LIKE
ENSGALT00000025710	NorthernBobwhite_ScaffoldedDeNovo_contig_3109	21779	7TM GPCR, ALFACTORY RECEPTOR/CHEMORECEPTOR SRSX
ENSGALT00000005974	NorthernBobwhite_ScaffoldedDeNovo_contig_40860	7438	A1CF
ENSGALT00000036535	NorthernBobwhite_ScaffoldedDeNovo_contig_24515	20223	A2LD1
ENSGALT00000022862	NorthernBobwhite_ScaffoldedDeNovo_contig_15609	12472	A4GALT
ENSGALT00000010653	NorthernBobwhite_ScaffoldedDeNovo_contig_9357	11502	A4GNT
ENSGALT00000022123	NorthernBobwhite_ScaffoldedDeNovo_contig_44684	1547	AAAS
ENSGALT00000016884	NorthernBobwhite_ScaffoldedDeNovo_contig_147	115144	AADAC
ENSGALT00000039475	NorthernBobwhite_ScaffoldedDeNovo_contig_14304	785	AADACL3
ENSGALT00000034075	NorthernBobwhite_ScaffoldedDeNovo_contig_384	86319	AAED1
ENSGALT00000012808	NorthernBobwhite_ScaffoldedDeNovo_contig_35899	705	AAGAB
ENSGALT00000018663	NorthernBobwhite_ScaffoldedDeNovo_contig_3523	25728	AAMP
ENSGALT00000003024	NorthernBobwhite_ScaffoldedDeNovo_contig_15319	855	AANAT
ENSGALT00000022357	NorthernBobwhite_ScaffoldedDeNovo_contig_2103	77794	AASDH
ENSGALT00000008707	NorthernBobwhite_ScaffoldedDeNovo_contig_206	11454	AATF
ENSGALT00000011176	NorthernBobwhite_ScaffoldedDeNovo_contig_18837	16673	AATK
ENSGALT00000011867	NorthernBobwhite_ScaffoldedDeNovo_contig_17008	25274	ABAT
ENSGALT00000014467	NorthernBobwhite_ScaffoldedDeNovo_contig_34351	29962	ABC TRANSPORTER-LIKE
ENSGALT00000031002	NorthernBobwhite_ScaffoldedDeNovo_contig_69001	240	ABCA13
ENSGALT00000018079	NorthernBobwhite_ScaffoldedDeNovo_contig_16138	4292	ABCB10
ENSGALT00000038272	NorthernBobwhite_ScaffoldedDeNovo_contig_22354	17674	ABCB6
ENSGALT00000005928	NorthernBobwhite_ScaffoldedDeNovo_contig_50104	6957	ABCB9
ENSGALT00000010749	NorthernBobwhite_ScaffoldedDeNovo_contig_3738	15017	ABCC1
ENSGALT00000027309	NorthernBobwhite_ScaffoldedDeNovo_contig_8767	13808	ABCC4
ENSGALT00000013625	NorthernBobwhite_ScaffoldedDeNovo_contig_9607	11100	ABCC5
ENSGALT00000019539	NorthernBobwhite_ScaffoldedDeNovo_contig_14741	50637	ABCD2
ENSGALT00000009059	NorthernBobwhite_ScaffoldedDeNovo_contig_722	31914	ABCD3
ENSGALT00000016629	NorthernBobwhite_ScaffoldedDeNovo_contig_1121	47456	ABCD4
ENSGALT00000021790	NorthernBobwhite_ScaffoldedDeNovo_contig_8331	58697	ABCF2
ENSGALT00000013818	NorthernBobwhite_ScaffoldedDeNovo_contig_8309	9394	ABCF3
ENSGALT00000026046	NorthernBobwhite_ScaffoldedDeNovo_contig_37873	14349	ABCG1
ENSGALT00000010990	NorthernBobwhite_ScaffoldedDeNovo_contig_9899	3631	ABCG4
ENSGALT00000016186	NorthernBobwhite_ScaffoldedDeNovo_contig_5700	5942	ABCG8
ENSGALT00000024813	NorthernBobwhite_ScaffoldedDeNovo_contig_133996	118	ABHD10
ENSGALT00000001583	NorthernBobwhite_ScaffoldedDeNovo_contig_4598	14140	ABHD11
ENSGALT00000032445	NorthernBobwhite_ScaffoldedDeNovo_contig_27095	246	ABHD12B
ENSGALT00000027229	NorthernBobwhite_ScaffoldedDeNovo_contig_2988	19623	ABHD13
ENSGALT00000046155	NorthernBobwhite_ScaffoldedDeNovo_contig_2436	51578	ABHD14A
ENSGALT00000010812	NorthernBobwhite_ScaffoldedDeNovo_contig_229	5555	ABHD2
ENSGALT00000024095	NorthernBobwhite_ScaffoldedDeNovo_contig_47488	6905	ABHD3
ENSGALT00000018764	NorthernBobwhite_ScaffoldedDeNovo_contig_46539	1342	ABHD5
ENSGALT00000031147	NorthernBobwhite_ScaffoldedDeNovo_contig_46539	1342	ABHD5
ENSGALT00000009138	NorthernBobwhite_ScaffoldedDeNovo_contig_2246	921	ABHD6
ENSGALT00000044039	NorthernBobwhite_ScaffoldedDeNovo_contig_19081	2427	ABHD8
ENSGALT00000014180	NorthernBobwhite_ScaffoldedDeNovo_contig_35935	40061	ABI1
ENSGALT00000001966	NorthernBobwhite_ScaffoldedDeNovo_contig_32372	39393	ABI3
ENSGALT00000006164	NorthernBobwhite_ScaffoldedDeNovo_contig_1944	1296	ABL1
ENSGALT00000006699	NorthernBobwhite_ScaffoldedDeNovo_contig_12321	35506	ABL2
ENSGALT00000025088	NorthernBobwhite_ScaffoldedDeNovo_contig_4256	46226	ABLIM2
ENSGALT00000044033	NorthernBobwhite_ScaffoldedDeNovo_contig_100721	8084	ABP1
ENSGALT00000025913	NorthernBobwhite_ScaffoldedDeNovo_contig_14795	7415	ABRA
ENSGALT00000009651	NorthernBobwhite_ScaffoldedDeNovo_contig_2704	59158	ABTB1
ENSGALT00000018959	NorthernBobwhite_ScaffoldedDeNovo_contig_2593	34408	ABTB2
ENSGALT00000004384	NorthernBobwhite_ScaffoldedDeNovo_contig_9969	57770	ACAA2
ENSGALT00000019130	NorthernBobwhite_ScaffoldedDeNovo_contig_173	51533	ACAD11
ENSGALT00000008070	NorthernBobwhite_ScaffoldedDeNovo_contig_16166	2581	ACAD9
ENSGALT00000002716	NorthernBobwhite_ScaffoldedDeNovo_contig_2112	32975	ACAP3
ENSGALT00000019060	NorthernBobwhite_ScaffoldedDeNovo_contig_68370	544	ACAT2
ENSGALT00000012158	NorthernBobwhite_ScaffoldedDeNovo_contig_46584	449	ACBD5
ENSGALT00000031228	NorthernBobwhite_ScaffoldedDeNovo_contig_9406	3465	ACBD7
ENSGALT00000015254	NorthernBobwhite_ScaffoldedDeNovo_contig_20861	9339	ACCN5
ENSGALT00000034614	NorthernBobwhite_ScaffoldedDeNovo_contig_12193	6567	ACD
ENSGALT00000040528	NorthernBobwhite_ScaffoldedDeNovo_contig_10946	6028	ACE
ENSGALT00000002417	NorthernBobwhite_ScaffoldedDeNovo_contig_795	5273	ACER1
ENSGALT00000024328	NorthernBobwhite_ScaffoldedDeNovo_contig_11397	117766	ACER2
ENSGALT00000019917	NorthernBobwhite_ScaffoldedDeNovo_contig_21679	86025	ACMSD
ENSGALT00000045800	NorthernBobwhite_ScaffoldedDeNovo_contig_176051	93	ACN9
ENSGALT00000019494	NorthernBobwhite_ScaffoldedDeNovo_contig_13128	26741	ACO2
ENSGALT00000022178	NorthernBobwhite_ScaffoldedDeNovo_contig_45168	20623	ACOT13
ENSGALT00000000926	NorthernBobwhite_ScaffoldedDeNovo_contig_21272	2495	ACOT7
ENSGALT00000011074	NorthernBobwhite_ScaffoldedDeNovo_contig_36935	9870	ACOT8
ENSGALT00000026377	NorthernBobwhite_ScaffoldedDeNovo_contig_33276	2550	ACOT9
ENSGALT00000003381	NorthernBobwhite_ScaffoldedDeNovo_contig_883	34307	ACOX1
ENSGALT00000026395	NorthernBobwhite_ScaffoldedDeNovo_contig_5635	73355	ACP1
ENSGALT00000013368	NorthernBobwhite_ScaffoldedDeNovo_contig_19574	23820	ACP2
ENSGALT00000024972	NorthernBobwhite_ScaffoldedDeNovo_contig_6761	23920	ACP6
ENSGALT00000019043	NorthernBobwhite_ScaffoldedDeNovo_contig_17379	8633	ACPP
ENSGALT00000023342	NorthernBobwhite_ScaffoldedDeNovo_contig_22061	29503	ACRBP
ENSGALT00000032407	NorthernBobwhite_ScaffoldedDeNovo_contig_2101	817	ACRC
ENSGALT00000045836	NorthernBobwhite_ScaffoldedDeNovo_contig_6346	112344	ACSBG2
ENSGALT00000038263	NorthernBobwhite_ScaffoldedDeNovo_contig_50821	10606	ACSF2
ENSGALT00000010048	NorthernBobwhite_ScaffoldedDeNovo_contig_9649	26523	ACSF3
ENSGALT00000017294	NorthernBobwhite_ScaffoldedDeNovo_contig_7791	26644	ACSL1
ENSGALT00000008360	NorthernBobwhite_ScaffoldedDeNovo_contig_26282	25290	ACSL3
ENSGALT00000013126	NorthernBobwhite_ScaffoldedDeNovo_contig_10239	3491	ACSL4
ENSGALT00000014365	NorthernBobwhite_ScaffoldedDeNovo_contig_17913	34423	ACSL5
ENSGALT00000003444	NorthernBobwhite_ScaffoldedDeNovo_contig_712	1654	ACSM3
ENSGALT00000014068	NorthernBobwhite_ScaffoldedDeNovo_contig_29569	4682	ACSS1
ENSGALT00000018064	NorthernBobwhite_ScaffoldedDeNovo_contig_98083	239	ACTA1
ENSGALT00000015673	NorthernBobwhite_ScaffoldedDeNovo_contig_2306	35581	ACTB
ENSGALT00000023569	NorthernBobwhite_ScaffoldedDeNovo_contig_8729	109671	ACTBL2
ENSGALT00000016005	NorthernBobwhite_ScaffoldedDeNovo_contig_38097	6615	ACTC1
ENSGALT00000045981	NorthernBobwhite_ScaffoldedDeNovo_contig_45272	7	ACTG1
ENSGALT00000010253	NorthernBobwhite_ScaffoldedDeNovo_contig_11720	1113	ACTG2
ENSGALT00000044332	NorthernBobwhite_ScaffoldedDeNovo_contig_6386	9747	ACTIN-BINDING FH2
ENSGALT00000002192	NorthernBobwhite_ScaffoldedDeNovo_contig_11757	28421	ACTL10
ENSGALT00000039568	NorthernBobwhite_ScaffoldedDeNovo_contig_17344	162154	ACTL6A
ENSGALT00000015425	NorthernBobwhite_ScaffoldedDeNovo_contig_1730	47403	ACTN1
ENSGALT00000015426	NorthernBobwhite_ScaffoldedDeNovo_contig_1730	47403	ACTN1
ENSGALT00000032616	NorthernBobwhite_ScaffoldedDeNovo_contig_1730	74212	ACTN1
ENSGALT00000038021	NorthernBobwhite_ScaffoldedDeNovo_contig_1730	47404	ACTN1
ENSGALT00000023128	NorthernBobwhite_ScaffoldedDeNovo_contig_70319	67	ACTN4
ENSGALT00000019657	NorthernBobwhite_ScaffoldedDeNovo_contig_11611	6782	ACTR10
ENSGALT00000013124	NorthernBobwhite_ScaffoldedDeNovo_contig_2029	50185	ACTR1A
ENSGALT00000014276	NorthernBobwhite_ScaffoldedDeNovo_contig_3983	3450	ACTR2
ENSGALT00000019859	NorthernBobwhite_ScaffoldedDeNovo_contig_26288	12978	ACTR3
ENSGALT00000010164	NorthernBobwhite_ScaffoldedDeNovo_contig_14286	15121	ACTR3B
ENSGALT00000005634	NorthernBobwhite_ScaffoldedDeNovo_contig_83209	184	ACTR5
ENSGALT00000018851	NorthernBobwhite_ScaffoldedDeNovo_contig_64583	4732	ACTR6
ENSGALT00000038216	NorthernBobwhite_ScaffoldedDeNovo_contig_64583	4732	ACTR6
ENSGALT00000001613	NorthernBobwhite_ScaffoldedDeNovo_contig_60	15077	ACTRT2
ENSGALT00000020497	NorthernBobwhite_ScaffoldedDeNovo_contig_552	62790	ACVR1
ENSGALT00000020492	NorthernBobwhite_ScaffoldedDeNovo_contig_19372	1075	ACVR1B
ENSGALT00000037806	NorthernBobwhite_ScaffoldedDeNovo_contig_3207	11268	ACVR2A
ENSGALT00000009945	NorthernBobwhite_ScaffoldedDeNovo_contig_8001	15257	ACVR2B
ENSGALT00000035985	NorthernBobwhite_ScaffoldedDeNovo_contig_33639	1	ACVRL1
ENSGALT00000037727	NorthernBobwhite_ScaffoldedDeNovo_contig_26966	354	ACYP1
ENSGALT00000045290	NorthernBobwhite_ScaffoldedDeNovo_contig_6923	15414	ACYP2
ENSGALT00000043251	NorthernBobwhite_ScaffoldedDeNovo_contig_43685	47	ADAM11
ENSGALT00000014604	NorthernBobwhite_ScaffoldedDeNovo_contig_7981	50641	ADAM11-201
ENSGALT00000045950	NorthernBobwhite_ScaffoldedDeNovo_contig_19740	12257	ADAM12
ENSGALT00000022453	NorthernBobwhite_ScaffoldedDeNovo_contig_22436	8128	ADAM21
ENSGALT00000000481	NorthernBobwhite_ScaffoldedDeNovo_contig_375	100268	ADAM28
ENSGALT00000043986	NorthernBobwhite_ScaffoldedDeNovo_contig_9599	34239	ADAM33
ENSGALT00000025465	NorthernBobwhite_ScaffoldedDeNovo_contig_13415	34667	ADAMTS1
ENSGALT00000005219	NorthernBobwhite_ScaffoldedDeNovo_contig_585	54212	ADAMTS12
ENSGALT00000002140	NorthernBobwhite_ScaffoldedDeNovo_contig_37121	4187	ADAMTS15
ENSGALT00000011448	NorthernBobwhite_ScaffoldedDeNovo_contig_27323	3	ADAMTS17
ENSGALT00000008573	NorthernBobwhite_ScaffoldedDeNovo_contig_25187	75746	ADAMTS18
ENSGALT00000009653	NorthernBobwhite_ScaffoldedDeNovo_contig_16830	75197	ADAMTS2
ENSGALT00000018988	NorthernBobwhite_ScaffoldedDeNovo_contig_19809	27954	ADAMTS3
ENSGALT00000025470	NorthernBobwhite_ScaffoldedDeNovo_contig_19399	12506	ADAMTS5
ENSGALT00000002090	NorthernBobwhite_ScaffoldedDeNovo_contig_24636	3622	ADAMTS8
ENSGALT00000004669	NorthernBobwhite_ScaffoldedDeNovo_contig_7452	39469	ADAMTSL2
ENSGALT00000009854	NorthernBobwhite_ScaffoldedDeNovo_contig_5396	13098	ADAMTSL3
ENSGALT00000041053	NorthernBobwhite_ScaffoldedDeNovo_contig_28210	1371	ADAMTSL5
ENSGALT00000034244	NorthernBobwhite_ScaffoldedDeNovo_contig_6470	59748	ADAP1
ENSGALT00000005258	NorthernBobwhite_ScaffoldedDeNovo_contig_11983	10790	ADAP2
ENSGALT00000040721	NorthernBobwhite_ScaffoldedDeNovo_contig_24896	1676	ADAR
ENSGALT00000039535	NorthernBobwhite_ScaffoldedDeNovo_contig_2021	28460	ADARB1
ENSGALT00000010993	NorthernBobwhite_ScaffoldedDeNovo_contig_13875	44113	ADARB2
ENSGALT00000001336	NorthernBobwhite_ScaffoldedDeNovo_contig_4779	67172	ADAT1
ENSGALT00000031785	NorthernBobwhite_ScaffoldedDeNovo_contig_6747	16168	ADAT2
ENSGALT00000005718	NorthernBobwhite_ScaffoldedDeNovo_contig_6793	8165	ADC
ENSGALT00000017107	NorthernBobwhite_ScaffoldedDeNovo_contig_4756	17739	ADCK1
ENSGALT00000020977	NorthernBobwhite_ScaffoldedDeNovo_contig_19626	56	ADCK2
ENSGALT00000014777	NorthernBobwhite_ScaffoldedDeNovo_contig_14712	4052	ADCK3
ENSGALT00000020322	NorthernBobwhite_ScaffoldedDeNovo_contig_23337	11894	ADCY1
ENSGALT00000021320	NorthernBobwhite_ScaffoldedDeNovo_contig_16009	10212	ADCY2
ENSGALT00000037994	NorthernBobwhite_ScaffoldedDeNovo_contig_26566	11	ADCY5
ENSGALT00000026293	NorthernBobwhite_ScaffoldedDeNovo_contig_22804	204	ADCY8
ENSGALT00000012620	NorthernBobwhite_ScaffoldedDeNovo_contig_22247	5269	ADCY9
ENSGALT00000023977	NorthernBobwhite_ScaffoldedDeNovo_contig_82505	191	ADCYAP1
ENSGALT00000008391	NorthernBobwhite_ScaffoldedDeNovo_contig_180257	103	ADCYAP1R1
ENSGALT00000043252	NorthernBobwhite_ScaffoldedDeNovo_contig_180257	103	ADCYAP1R1
ENSGALT00000025259	NorthernBobwhite_ScaffoldedDeNovo_contig_19583	3927	ADD1
ENSGALT00000043688	NorthernBobwhite_ScaffoldedDeNovo_contig_50015	1203	ADD2
ENSGALT00000013918	NorthernBobwhite_ScaffoldedDeNovo_contig_21039	3498	ADD3
ENSGALT00000033133	NorthernBobwhite_ScaffoldedDeNovo_contig_21039	3498	ADD3
ENSGALT00000043456	NorthernBobwhite_ScaffoldedDeNovo_contig_21039	3498	ADD3
ENSGALT00000044626	NorthernBobwhite_ScaffoldedDeNovo_contig_1854	4089	ADENYLYL CYCLASE CLASS-3/4/GUANYLYL CYCLASE
ENSGALT00000045023	NorthernBobwhite_ScaffoldedDeNovo_contig_1854	13845	ADENYLYL CYCLASE CLASS-3/4/GUANYLYL CYCLASE
ENSGALT00000045221	NorthernBobwhite_ScaffoldedDeNovo_contig_1854	13325	ADENYLYL CYCLASE CLASS-3/4/GUANYLYL CYCLASE
ENSGALT00000045615	NorthernBobwhite_ScaffoldedDeNovo_contig_1854	13845	ADENYLYL CYCLASE CLASS-3/4/GUANYLYL CYCLASE
ENSGALT00000045774	NorthernBobwhite_ScaffoldedDeNovo_contig_1854	4112	ADENYLYL CYCLASE CLASS-3/4/GUANYLYL CYCLASE
ENSGALT00000004112	NorthernBobwhite_ScaffoldedDeNovo_contig_1854	4112	ADENYLYL CYCLASE CLASS-3/4/GUANYLYL CYCLASE
ENSGALT00000020006	NorthernBobwhite_ScaffoldedDeNovo_contig_14651	600	ADH1
ENSGALT00000032121	NorthernBobwhite_ScaffoldedDeNovo_contig_98440	2	ADH1B
ENSGALT00000032123	NorthernBobwhite_ScaffoldedDeNovo_contig_98440	2	ADH1B
ENSGALT00000037633	NorthernBobwhite_ScaffoldedDeNovo_contig_98440	2	ADH1B
ENSGALT00000019994	NorthernBobwhite_ScaffoldedDeNovo_contig_32327	245	ADH5
ENSGALT00000022941	NorthernBobwhite_ScaffoldedDeNovo_contig_12965	14654	ADHFE1
ENSGALT00000043545	NorthernBobwhite_ScaffoldedDeNovo_contig_27686	544	ADI1
ENSGALT00000008913	NorthernBobwhite_ScaffoldedDeNovo_contig_18924	6103	ADIPOQ
ENSGALT00000000132	NorthernBobwhite_ScaffoldedDeNovo_contig_16	5144	ADIPOR1
ENSGALT00000021230	NorthernBobwhite_ScaffoldedDeNovo_contig_6919	127095	ADIPOR2
ENSGALT00000037507	NorthernBobwhite_ScaffoldedDeNovo_contig_6919	125055	ADIPOR2
ENSGALT00000008109	NorthernBobwhite_ScaffoldedDeNovo_contig_31658	2536	ADK
ENSGALT00000009088	NorthernBobwhite_ScaffoldedDeNovo_contig_23816	22532	ADM
ENSGALT00000045014	NorthernBobwhite_ScaffoldedDeNovo_contig_36956	5854	ADMP
ENSGALT00000012969	NorthernBobwhite_ScaffoldedDeNovo_contig_3697	4095	ADNP
ENSGALT00000020622	NorthernBobwhite_ScaffoldedDeNovo_contig_3605	17408	ADNP2
ENSGALT00000000224	NorthernBobwhite_ScaffoldedDeNovo_contig_13710	10256	ADORA1
ENSGALT00000033891	NorthernBobwhite_ScaffoldedDeNovo_contig_2688	33669	ADORA2A
ENSGALT00000028044	NorthernBobwhite_ScaffoldedDeNovo_contig_36939	8213	ADORA2B
ENSGALT00000002217	NorthernBobwhite_ScaffoldedDeNovo_contig_6776	34675	ADORA3
ENSGALT00000045853	NorthernBobwhite_ScaffoldedDeNovo_contig_6776	34665	ADORA3
ENSGALT00000002757	NorthernBobwhite_ScaffoldedDeNovo_contig_6256	2164	ADPGK
ENSGALT00000030399	NorthernBobwhite_ScaffoldedDeNovo_contig_62180	295	ADPRH
ENSGALT00000027166	NorthernBobwhite_ScaffoldedDeNovo_contig_5548	40297	ADPRHL1
ENSGALT00000003624	NorthernBobwhite_ScaffoldedDeNovo_contig_49495	1811	ADPRHL2
ENSGALT00000000639	NorthernBobwhite_ScaffoldedDeNovo_contig_9495	44041	ADRA1A
ENSGALT00000002157	NorthernBobwhite_ScaffoldedDeNovo_contig_3013	4640	ADRA1B
ENSGALT00000025740	NorthernBobwhite_ScaffoldedDeNovo_contig_7763	72534	ADRA1D
ENSGALT00000039041	NorthernBobwhite_ScaffoldedDeNovo_contig_2564	160446	ADRA2A
ENSGALT00000025167	NorthernBobwhite_ScaffoldedDeNovo_contig_27208	31895	ADRA2C
ENSGALT00000014554	NorthernBobwhite_ScaffoldedDeNovo_contig_12578	56624	ADRB1
ENSGALT00000030002	NorthernBobwhite_ScaffoldedDeNovo_contig_75869	1	ADRB1
ENSGALT00000029637	NorthernBobwhite_ScaffoldedDeNovo_contig_36374	3843	ADRBK1
ENSGALT00000008350	NorthernBobwhite_ScaffoldedDeNovo_contig_12498	30661	ADRM1
ENSGALT00000019639	NorthernBobwhite_ScaffoldedDeNovo_contig_19708	32787	ADSL
ENSGALT00000017407	NorthernBobwhite_ScaffoldedDeNovo_contig_5880	18060	ADSS
ENSGALT00000044639	NorthernBobwhite_ScaffoldedDeNovo_contig_18765	24170	ADTRP
ENSGALT00000043239	NorthernBobwhite_ScaffoldedDeNovo_contig_12817	7133	AEBP1
ENSGALT00000021444	NorthernBobwhite_ScaffoldedDeNovo_contig_12579	575	AEBP2
ENSGALT00000010894	NorthernBobwhite_ScaffoldedDeNovo_contig_4493	79438	AEN
ENSGALT00000043730	NorthernBobwhite_ScaffoldedDeNovo_contig_75383	1	AES
ENSGALT00000025080	NorthernBobwhite_ScaffoldedDeNovo_contig_31193	12742	AFAP1
ENSGALT00000037240	NorthernBobwhite_ScaffoldedDeNovo_contig_31193	22432	AFAP1
ENSGALT00000037241	NorthernBobwhite_ScaffoldedDeNovo_contig_31193	22433	AFAP1
ENSGALT00000017992	NorthernBobwhite_ScaffoldedDeNovo_contig_11734	13482	AFF1
ENSGALT00000014934	NorthernBobwhite_ScaffoldedDeNovo_contig_16688	49108	AFF2
ENSGALT00000027071	NorthernBobwhite_ScaffoldedDeNovo_contig_1921	269	AFF3
ENSGALT00000011543	NorthernBobwhite_ScaffoldedDeNovo_contig_4573	16188	AFF4
ENSGALT00000000158	NorthernBobwhite_ScaffoldedDeNovo_contig_242	16449	AFMID
ENSGALT00000019056	NorthernBobwhite_ScaffoldedDeNovo_contig_38167	13383	AFP
ENSGALT00000014347	NorthernBobwhite_ScaffoldedDeNovo_contig_89892	1	AFTPH
ENSGALT00000006438	NorthernBobwhite_ScaffoldedDeNovo_contig_15946	11416	AGAP1
ENSGALT00000021774	NorthernBobwhite_ScaffoldedDeNovo_contig_8331	12059	AGAP3
ENSGALT00000011024	NorthernBobwhite_ScaffoldedDeNovo_contig_6775	123220	AGBL1
ENSGALT00000019160	NorthernBobwhite_ScaffoldedDeNovo_contig_2242	13170	AGBL3
ENSGALT00000004824	NorthernBobwhite_ScaffoldedDeNovo_contig_5834	37171	AGFG1
ENSGALT00000006867	NorthernBobwhite_ScaffoldedDeNovo_contig_20816	5841	AGGF1
ENSGALT00000020996	NorthernBobwhite_ScaffoldedDeNovo_contig_314	30493	AGK
ENSGALT00000022238	NorthernBobwhite_ScaffoldedDeNovo_contig_44226	17301	AGMAT
ENSGALT00000037945	NorthernBobwhite_ScaffoldedDeNovo_contig_40767	3717	AGMO
ENSGALT00000000376	NorthernBobwhite_ScaffoldedDeNovo_contig_3122	22453	AGPAT1
ENSGALT00000039021	NorthernBobwhite_ScaffoldedDeNovo_contig_536	46663	AGPAT2
ENSGALT00000018874	NorthernBobwhite_ScaffoldedDeNovo_contig_35144	9290	AGPAT4
ENSGALT00000026340	NorthernBobwhite_ScaffoldedDeNovo_contig_5604	48573	AGPAT5
ENSGALT00000005561	NorthernBobwhite_ScaffoldedDeNovo_contig_3708	135987	AGPAT6
ENSGALT00000018298	NorthernBobwhite_ScaffoldedDeNovo_contig_15594	13537	AGPAT9
ENSGALT00000004836	NorthernBobwhite_ScaffoldedDeNovo_contig_13362	465	AGPHD1
ENSGALT00000015032	NorthernBobwhite_ScaffoldedDeNovo_contig_13521	56156	AGPS
ENSGALT00000017599	NorthernBobwhite_ScaffoldedDeNovo_contig_158088	869	AGR2
ENSGALT00000003511	NorthernBobwhite_ScaffoldedDeNovo_contig_12135	74861	AGRP
ENSGALT00000040143	NorthernBobwhite_ScaffoldedDeNovo_contig_12135	74861	AGRP
ENSGALT00000044750	NorthernBobwhite_ScaffoldedDeNovo_contig_12135	74861	AGRP
ENSGALT00000018111	NorthernBobwhite_ScaffoldedDeNovo_contig_41298	1867	AGT
ENSGALT00000020569	NorthernBobwhite_ScaffoldedDeNovo_contig_1356	80715	AGTPBP1
ENSGALT00000040471	NorthernBobwhite_ScaffoldedDeNovo_contig_18187	8691	AGTR1
ENSGALT00000009554	NorthernBobwhite_ScaffoldedDeNovo_contig_650	9162	AGTR2
ENSGALT00000007362	NorthernBobwhite_ScaffoldedDeNovo_contig_848	27054	AGTRAP
ENSGALT00000033625	NorthernBobwhite_ScaffoldedDeNovo_contig_1292	32776	AGXT
ENSGALT00000005433	NorthernBobwhite_ScaffoldedDeNovo_contig_12345	70557	AGXT2
ENSGALT00000017134	NorthernBobwhite_ScaffoldedDeNovo_contig_15014	60484	AGXT2L1
ENSGALT00000023235	NorthernBobwhite_ScaffoldedDeNovo_contig_19101	37838	AGXT2L2
ENSGALT00000012929	NorthernBobwhite_ScaffoldedDeNovo_contig_18741	28118	AHCYL2
ENSGALT00000022607	NorthernBobwhite_ScaffoldedDeNovo_contig_19401	8787	AHI1
ENSGALT00000044063	NorthernBobwhite_ScaffoldedDeNovo_contig_39413	49	AHNAK
ENSGALT00000017616	NorthernBobwhite_ScaffoldedDeNovo_contig_9880	82776	AHR
ENSGALT00000021857	NorthernBobwhite_ScaffoldedDeNovo_contig_2932	18167	AHRR
ENSGALT00000017033	NorthernBobwhite_ScaffoldedDeNovo_contig_6737	54191	AHSA1
ENSGALT00000007141	NorthernBobwhite_ScaffoldedDeNovo_contig_23124	2302	AHSA2
ENSGALT00000014007	NorthernBobwhite_ScaffoldedDeNovo_contig_12902	153112	AHSG
ENSGALT00000023094	NorthernBobwhite_ScaffoldedDeNovo_contig_8457	57262	AICDA
ENSGALT00000038630	NorthernBobwhite_ScaffoldedDeNovo_contig_5567	12747	AIDA
ENSGALT00000044788	NorthernBobwhite_ScaffoldedDeNovo_contig_617	19980	AIF1L
ENSGALT00000007626	NorthernBobwhite_ScaffoldedDeNovo_contig_4577	35133	AIFM2
ENSGALT00000022379	NorthernBobwhite_ScaffoldedDeNovo_contig_68763	602	AIG1
ENSGALT00000037261	NorthernBobwhite_ScaffoldedDeNovo_contig_9514	17063	AIM1
ENSGALT00000000695	NorthernBobwhite_ScaffoldedDeNovo_contig_18903	26531	AIM1L
ENSGALT00000017172	NorthernBobwhite_ScaffoldedDeNovo_contig_40563	8547	AIMP1
ENSGALT00000005377	NorthernBobwhite_ScaffoldedDeNovo_contig_10909	39974	AIMP2
ENSGALT00000021966	NorthernBobwhite_ScaffoldedDeNovo_contig_5536	1881	AIOLOS
ENSGALT00000021548	NorthernBobwhite_ScaffoldedDeNovo_contig_11087	22226	AIP
ENSGALT00000008029	NorthernBobwhite_ScaffoldedDeNovo_contig_15678	30384	AIPL1
ENSGALT00000041318	NorthernBobwhite_ScaffoldedDeNovo_contig_4736	39673	AIRE
ENSGALT00000044613	NorthernBobwhite_ScaffoldedDeNovo_contig_3802	22324	AJAP1
ENSGALT00000043760	NorthernBobwhite_ScaffoldedDeNovo_contig_21298	150	AK1
ENSGALT00000023329	NorthernBobwhite_ScaffoldedDeNovo_contig_9752	11742	AK3
ENSGALT00000017973	NorthernBobwhite_ScaffoldedDeNovo_contig_8651	3708	AK3L2
ENSGALT00000008944	NorthernBobwhite_ScaffoldedDeNovo_contig_944	9377	AKAP1
ENSGALT00000007457	NorthernBobwhite_ScaffoldedDeNovo_contig_1016	167876	AKAP10
ENSGALT00000036494	NorthernBobwhite_ScaffoldedDeNovo_contig_6664	6344	AKAP11
ENSGALT00000044286	NorthernBobwhite_ScaffoldedDeNovo_contig_5975	18566	AKAP13
ENSGALT00000045722	NorthernBobwhite_ScaffoldedDeNovo_contig_5975	18566	AKAP13
ENSGALT00000032302	NorthernBobwhite_ScaffoldedDeNovo_contig_18745	13223	AKAP14
ENSGALT00000026925	NorthernBobwhite_ScaffoldedDeNovo_contig_14952	34874	AKAP17A
ENSGALT00000019151	NorthernBobwhite_ScaffoldedDeNovo_contig_31672	317	AKAP5
ENSGALT00000037415	NorthernBobwhite_ScaffoldedDeNovo_contig_31672	416	AKAP5
ENSGALT00000004310	NorthernBobwhite_ScaffoldedDeNovo_contig_26952	17132	AKAP7
ENSGALT00000022069	NorthernBobwhite_ScaffoldedDeNovo_contig_18369	4895	AKAP8L
ENSGALT00000021346	NorthernBobwhite_ScaffoldedDeNovo_contig_2160	4352	AKR
ENSGALT00000016649	NorthernBobwhite_ScaffoldedDeNovo_contig_1624	101543	AKR1A1
ENSGALT00000021337	NorthernBobwhite_ScaffoldedDeNovo_contig_8919	6525	AKR1B1
ENSGALT00000021332	NorthernBobwhite_ScaffoldedDeNovo_contig_34770	4862	AKR1B10
ENSGALT00000020934	NorthernBobwhite_ScaffoldedDeNovo_contig_180032	112	AKR1D1
ENSGALT00000006382	NorthernBobwhite_ScaffoldedDeNovo_contig_33601	7049	AKR7A2
ENSGALT00000031871	NorthernBobwhite_ScaffoldedDeNovo_contig_27303	11207	AKT3
ENSGALT00000005731	NorthernBobwhite_ScaffoldedDeNovo_contig_747	91836	AKTIP
ENSGALT00000039705	NorthernBobwhite_ScaffoldedDeNovo_contig_747	92663	AKTIP
ENSGALT00000036281	NorthernBobwhite_ScaffoldedDeNovo_contig_7154	16992	ALAS1
ENSGALT00000001386	NorthernBobwhite_ScaffoldedDeNovo_contig_21296	6527	ALC
ENSGALT00000024442	NorthernBobwhite_ScaffoldedDeNovo_contig_15586	115912	ALDH1A1
ENSGALT00000006791	NorthernBobwhite_ScaffoldedDeNovo_contig_23168	2561	ALDH1A2
ENSGALT00000034428	NorthernBobwhite_ScaffoldedDeNovo_contig_20118	20671	ALDH1A2
ENSGALT00000006036	NorthernBobwhite_ScaffoldedDeNovo_contig_7189	92338	ALDH4A1
ENSGALT00000020670	NorthernBobwhite_ScaffoldedDeNovo_contig_26765	6307	ALDH5A1
ENSGALT00000011551	NorthernBobwhite_ScaffoldedDeNovo_contig_4475	148987	ALDH6
ENSGALT00000016604	NorthernBobwhite_ScaffoldedDeNovo_contig_8029	1717	ALDH6A1
ENSGALT00000022641	NorthernBobwhite_ScaffoldedDeNovo_contig_71007	8157	ALDH8A1
ENSGALT00000005530	NorthernBobwhite_ScaffoldedDeNovo_contig_12889	155861	ALDH9A1
ENSGALT00000025056	NorthernBobwhite_ScaffoldedDeNovo_contig_406	371130	ALDOB
ENSGALT00000045371	NorthernBobwhite_ScaffoldedDeNovo_contig_56524	211	ALDOC
ENSGALT00000044078	NorthernBobwhite_ScaffoldedDeNovo_contig_22583	20997	ALG10
ENSGALT00000027505	NorthernBobwhite_ScaffoldedDeNovo_contig_3169	29707	ALG11
ENSGALT00000013914	NorthernBobwhite_ScaffoldedDeNovo_contig_6504	16493	ALG12
ENSGALT00000008961	NorthernBobwhite_ScaffoldedDeNovo_contig_4221	15298	ALG14
ENSGALT00000022094	NorthernBobwhite_ScaffoldedDeNovo_contig_13050	63884	ALG2
ENSGALT00000027546	NorthernBobwhite_ScaffoldedDeNovo_contig_30749	7524	ALG5
ENSGALT00000014702	NorthernBobwhite_ScaffoldedDeNovo_contig_16616	4261	ALK
ENSGALT00000007998	NorthernBobwhite_ScaffoldedDeNovo_contig_4267	38343	ALKBH2
ENSGALT00000012966	NorthernBobwhite_ScaffoldedDeNovo_contig_529	43179	ALKBH3
ENSGALT00000002854	NorthernBobwhite_ScaffoldedDeNovo_contig_9292	97576	ALKBH4
ENSGALT00000007980	NorthernBobwhite_ScaffoldedDeNovo_contig_3799	32543	ALKBH5
ENSGALT00000027732	NorthernBobwhite_ScaffoldedDeNovo_contig_6453	35623	ALKBH8
ENSGALT00000009416	NorthernBobwhite_ScaffoldedDeNovo_contig_240	23573	ALOX5
ENSGALT00000044379	NorthernBobwhite_ScaffoldedDeNovo_contig_1905	59996	ALOX5AP
ENSGALT00000030849	NorthernBobwhite_ScaffoldedDeNovo_contig_153	68040	ALPHA CARBONIC ANHYDRASE
ENSGALT00000006555	NorthernBobwhite_ScaffoldedDeNovo_contig_96387	1	ALPHA/BETA HYDROLASE FOLD-3
ENSGALT00000040049	NorthernBobwhite_ScaffoldedDeNovo_contig_5950	16233	ALPI
ENSGALT00000019725	NorthernBobwhite_ScaffoldedDeNovo_contig_3003	22105	ALPK1
ENSGALT00000004573	NorthernBobwhite_ScaffoldedDeNovo_contig_419	89227	ALPK2
ENSGALT00000003910	NorthernBobwhite_ScaffoldedDeNovo_contig_824	40250	ALPK3
ENSGALT00000039123	NorthernBobwhite_ScaffoldedDeNovo_contig_17372	30101	ALPL
ENSGALT00000012676	NorthernBobwhite_ScaffoldedDeNovo_contig_5950	12378	ALPP
ENSGALT00000013707	NorthernBobwhite_ScaffoldedDeNovo_contig_10924	107370	ALS2
ENSGALT00000008721	NorthernBobwhite_ScaffoldedDeNovo_contig_42643	12264	ALS2CL
ENSGALT00000033418	NorthernBobwhite_ScaffoldedDeNovo_contig_8880	107512	ALS2CR8
ENSGALT00000046004	NorthernBobwhite_ScaffoldedDeNovo_contig_67074	8954	ALX1
ENSGALT00000044482	NorthernBobwhite_ScaffoldedDeNovo_contig_10230	12517	ALX-4
ENSGALT00000011710	NorthernBobwhite_ScaffoldedDeNovo_contig_22909	12770	ALYREF
ENSGALT00000011538	NorthernBobwhite_ScaffoldedDeNovo_contig_14066	35531	AMBIGUOUS
ENSGALT00000043198	NorthernBobwhite_ScaffoldedDeNovo_contig_41010	3881	AMBIGUOUS
ENSGALT00000014597	NorthernBobwhite_ScaffoldedDeNovo_contig_2060	33981	AMBP
ENSGALT00000014677	NorthernBobwhite_ScaffoldedDeNovo_contig_4817	95737	AMBP
ENSGALT00000024267	NorthernBobwhite_ScaffoldedDeNovo_contig_6686	17803	AMD1
ENSGALT00000015029	NorthernBobwhite_ScaffoldedDeNovo_contig_14920	2760	AMDHD2
ENSGALT00000012291	NorthernBobwhite_ScaffoldedDeNovo_contig_30468	2627	AMER1
ENSGALT00000046042	NorthernBobwhite_ScaffoldedDeNovo_contig_999	24434	AMER3
ENSGALT00000004906	NorthernBobwhite_ScaffoldedDeNovo_contig_3385	185795	AMFR
ENSGALT00000015849	NorthernBobwhite_ScaffoldedDeNovo_contig_7979	1211	AMIGO2
ENSGALT00000045152	NorthernBobwhite_ScaffoldedDeNovo_contig_527	45337	AMIGO3
ENSGALT00000013107	NorthernBobwhite_ScaffoldedDeNovo_contig_16362	4936	AMMECR1
ENSGALT00000044633	NorthernBobwhite_ScaffoldedDeNovo_contig_20917	6878	AMMECR1L
ENSGALT00000044508	NorthernBobwhite_ScaffoldedDeNovo_contig_20792	1	AMMONIUM TRANSPORTER RH TYPE B-B-LIKE
ENSGALT00000018581	NorthernBobwhite_ScaffoldedDeNovo_contig_4620	35912	AMN
ENSGALT00000021103	NorthernBobwhite_ScaffoldedDeNovo_contig_25079	45616	AMN1
ENSGALT00000012914	NorthernBobwhite_ScaffoldedDeNovo_contig_860	167926	AMOT
ENSGALT00000027816	NorthernBobwhite_ScaffoldedDeNovo_contig_14316	1815	AMOTL1
ENSGALT00000010481	NorthernBobwhite_ScaffoldedDeNovo_contig_2247	38907	AMOTL2
ENSGALT00000044256	NorthernBobwhite_ScaffoldedDeNovo_contig_80619	469	AMPD2
ENSGALT00000018821	NorthernBobwhite_ScaffoldedDeNovo_contig_3201	44497	AMPH
ENSGALT00000045000	NorthernBobwhite_ScaffoldedDeNovo_contig_23951	614	AMT
ENSGALT00000008265	NorthernBobwhite_ScaffoldedDeNovo_contig_33641	925	AMY1A
ENSGALT00000006951	NorthernBobwhite_ScaffoldedDeNovo_contig_15433	38801	AMZ1
ENSGALT00000044835	NorthernBobwhite_ScaffoldedDeNovo_contig_19367	7386	ANAPC10
ENSGALT00000045126	NorthernBobwhite_ScaffoldedDeNovo_contig_157404	545	ANAPC15
ENSGALT00000007029	NorthernBobwhite_ScaffoldedDeNovo_contig_1652	307829	ANAPC16
ENSGALT00000014053	NorthernBobwhite_ScaffoldedDeNovo_contig_8123	5343	ANAPC2
ENSGALT00000037344	NorthernBobwhite_ScaffoldedDeNovo_contig_2697	52750	ANAPC4
ENSGALT00000006066	NorthernBobwhite_ScaffoldedDeNovo_contig_15044	4430	ANAPC7
ENSGALT00000036874	NorthernBobwhite_ScaffoldedDeNovo_contig_23993	29330	ANF654
ENSGALT00000041019	NorthernBobwhite_ScaffoldedDeNovo_contig_24557	2182	ANG
ENSGALT00000016899	NorthernBobwhite_ScaffoldedDeNovo_contig_46501	26302	ANGEL1
ENSGALT00000015943	NorthernBobwhite_ScaffoldedDeNovo_contig_218	9797	ANGEL2
ENSGALT00000025915	NorthernBobwhite_ScaffoldedDeNovo_contig_7827	81551	ANGPT1
ENSGALT00000045797	NorthernBobwhite_ScaffoldedDeNovo_contig_9577	1348	ANGPT4
ENSGALT00000006824	NorthernBobwhite_ScaffoldedDeNovo_contig_5965	6371	ANGPTL1
ENSGALT00000001362	NorthernBobwhite_ScaffoldedDeNovo_contig_13954	23627	ANGPTL2
ENSGALT00000017884	NorthernBobwhite_ScaffoldedDeNovo_contig_4980	55580	ANGPTL3
ENSGALT00000000877	NorthernBobwhite_ScaffoldedDeNovo_contig_85018	1514	ANGPTL4
ENSGALT00000036419	NorthernBobwhite_ScaffoldedDeNovo_contig_79920	1168	ANGPTL5
ENSGALT00000026792	NorthernBobwhite_ScaffoldedDeNovo_contig_11822	977	ANGPTL7
ENSGALT00000035033	NorthernBobwhite_ScaffoldedDeNovo_contig_4708	39332	ANGPTL7
ENSGALT00000024125	NorthernBobwhite_ScaffoldedDeNovo_contig_15028	21019	ANKDD1B
ENSGALT00000014988	NorthernBobwhite_ScaffoldedDeNovo_contig_10475	18390	ANKFN1
ENSGALT00000021148	NorthernBobwhite_ScaffoldedDeNovo_contig_23935	13392	ANKH
ENSGALT00000015304	NorthernBobwhite_ScaffoldedDeNovo_contig_11068	7892	ANKIB1
ENSGALT00000012682	NorthernBobwhite_ScaffoldedDeNovo_contig_2963	4076	ANKK1
ENSGALT00000045472	NorthernBobwhite_ScaffoldedDeNovo_contig_19081	10067	ANKLE1
ENSGALT00000017566	NorthernBobwhite_ScaffoldedDeNovo_contig_18890	4709	ANKMY2
ENSGALT00000022003	NorthernBobwhite_ScaffoldedDeNovo_contig_15848	8277	ANKRA2
ENSGALT00000035832	NorthernBobwhite_ScaffoldedDeNovo_contig_15848	7923	ANKRA2
ENSGALT00000010491	NorthernBobwhite_ScaffoldedDeNovo_contig_18424	28396	ANKRD1
ENSGALT00000027220	NorthernBobwhite_ScaffoldedDeNovo_contig_1652	367490	ANKRD10
ENSGALT00000013683	NorthernBobwhite_ScaffoldedDeNovo_contig_11865	35471	ANKRD12
ENSGALT00000008337	NorthernBobwhite_ScaffoldedDeNovo_contig_19807	6870	ANKRD13A
ENSGALT00000042815	NorthernBobwhite_ScaffoldedDeNovo_contig_34111	6606	ANKRD13B
ENSGALT00000043536	NorthernBobwhite_ScaffoldedDeNovo_contig_36374	1	ANKRD13D
ENSGALT00000013281	NorthernBobwhite_ScaffoldedDeNovo_contig_143474	150	ANKRD16
ENSGALT00000043375	NorthernBobwhite_ScaffoldedDeNovo_contig_8776	60263	ANKRD16
ENSGALT00000019023	NorthernBobwhite_ScaffoldedDeNovo_contig_25142	18559	ANKRD17
ENSGALT00000012192	NorthernBobwhite_ScaffoldedDeNovo_contig_9078	47882	ANKRD2
ENSGALT00000045852	NorthernBobwhite_ScaffoldedDeNovo_contig_39646	2820	ANKRD22
ENSGALT00000024247	NorthernBobwhite_ScaffoldedDeNovo_contig_12961	3236	ANKRD29
ENSGALT00000024108	NorthernBobwhite_ScaffoldedDeNovo_contig_9243	65742	ANKRD31
ENSGALT00000025121	NorthernBobwhite_ScaffoldedDeNovo_contig_7534	227797	ANKRD34B
ENSGALT00000013457	NorthernBobwhite_ScaffoldedDeNovo_contig_11910	22968	ANKRD34C
ENSGALT00000011948	NorthernBobwhite_ScaffoldedDeNovo_contig_2550	90542	ANKRD40
ENSGALT00000028271	NorthernBobwhite_ScaffoldedDeNovo_contig_20166	2797	ANKRD46
ENSGALT00000027818	NorthernBobwhite_ScaffoldedDeNovo_contig_15879	13362	ANKRD49
ENSGALT00000014632	NorthernBobwhite_ScaffoldedDeNovo_contig_20350	15252	ANKRD5
ENSGALT00000019307	NorthernBobwhite_ScaffoldedDeNovo_contig_2178	126861	ANKRD50
ENSGALT00000025431	NorthernBobwhite_ScaffoldedDeNovo_contig_5547	65190	ANKRD6
ENSGALT00000012339	NorthernBobwhite_ScaffoldedDeNovo_contig_4240	107102	ANKRD60
ENSGALT00000014719	NorthernBobwhite_ScaffoldedDeNovo_contig_6254	17850	ANKRD9
ENSGALT00000018558	NorthernBobwhite_ScaffoldedDeNovo_contig_13801	34440	ANKRD9
ENSGALT00000004295	NorthernBobwhite_ScaffoldedDeNovo_contig_8122	98316	ANKS1A
ENSGALT00000018814	NorthernBobwhite_ScaffoldedDeNovo_contig_38512	16772	ANKS1B
ENSGALT00000003850	NorthernBobwhite_ScaffoldedDeNovo_contig_10693	17922	ANKS4B
ENSGALT00000021557	NorthernBobwhite_ScaffoldedDeNovo_contig_31446	7835	ANKS6
ENSGALT00000024109	NorthernBobwhite_ScaffoldedDeNovo_contig_1611	13078	ANKYRIN REPEAT
ENSGALT00000043247	NorthernBobwhite_ScaffoldedDeNovo_contig_5093	4830	ANKYRIN REPEAT-CONTAINING DOMAIN
ENSGALT00000045995	NorthernBobwhite_ScaffoldedDeNovo_contig_5975	24110	ANKYRIN REPEAT-CONTAINING DOMAIN
ENSGALT00000014827	NorthernBobwhite_ScaffoldedDeNovo_contig_684	5598	ANKYRIN REPEAT-CONTAINING DOMAIN
ENSGALT00000018493	NorthernBobwhite_ScaffoldedDeNovo_contig_2603	11685	ANKZF1
ENSGALT00000037497	NorthernBobwhite_ScaffoldedDeNovo_contig_30639	19475	ANLN
ENSGALT00000012318	NorthernBobwhite_ScaffoldedDeNovo_contig_11847	13888	ANO1
ENSGALT00000018770	NorthernBobwhite_ScaffoldedDeNovo_contig_25434	18169	ANO10
ENSGALT00000037265	NorthernBobwhite_ScaffoldedDeNovo_contig_6813	48029	ANO2
ENSGALT00000042793	NorthernBobwhite_ScaffoldedDeNovo_contig_8078	12176	ANO8
ENSGALT00000044916	NorthernBobwhite_ScaffoldedDeNovo_contig_206756	22	ANOCTAMIN/TMEM 16
ENSGALT00000013068	NorthernBobwhite_ScaffoldedDeNovo_contig_115417	3	ANP32A
ENSGALT00000002401	NorthernBobwhite_ScaffoldedDeNovo_contig_89232	933	ANP32B
ENSGALT00000021945	NorthernBobwhite_ScaffoldedDeNovo_contig_1103	4669	ANP32E
ENSGALT00000009598	NorthernBobwhite_ScaffoldedDeNovo_contig_26554	13876	ANTXR1
ENSGALT00000017703	NorthernBobwhite_ScaffoldedDeNovo_contig_38210	10352	ANTXR2
ENSGALT00000015600	NorthernBobwhite_ScaffoldedDeNovo_contig_21881	10431	ANXA10
ENSGALT00000004195	NorthernBobwhite_ScaffoldedDeNovo_contig_104058	2292	ANXA11
ENSGALT00000026391	NorthernBobwhite_ScaffoldedDeNovo_contig_4146	6762	ANXA13
ENSGALT00000045820	NorthernBobwhite_ScaffoldedDeNovo_contig_4146	6762	ANXA13
ENSGALT00000005981	NorthernBobwhite_ScaffoldedDeNovo_contig_23363	4200	ANXA2
ENSGALT00000008499	NorthernBobwhite_ScaffoldedDeNovo_contig_37940	281	ANXA7
ENSGALT00000009577	NorthernBobwhite_ScaffoldedDeNovo_contig_20975	20308	ANXA8
ENSGALT00000019760	NorthernBobwhite_ScaffoldedDeNovo_contig_30639	2385	AOAH
ENSGALT00000013331	NorthernBobwhite_ScaffoldedDeNovo_contig_34803	22109	AOX2P
ENSGALT00000045568	NorthernBobwhite_ScaffoldedDeNovo_contig_3003	70	AP1AR
ENSGALT00000013205	NorthernBobwhite_ScaffoldedDeNovo_contig_34495	7756	AP1B1
ENSGALT00000001245	NorthernBobwhite_ScaffoldedDeNovo_contig_4895	26676	AP1G1
ENSGALT00000006310	NorthernBobwhite_ScaffoldedDeNovo_contig_8942	5655	AP1M1
ENSGALT00000045921	NorthernBobwhite_ScaffoldedDeNovo_contig_94104	102	AP1M2
ENSGALT00000026710	NorthernBobwhite_ScaffoldedDeNovo_contig_42612	11294	AP1S2
ENSGALT00000008302	NorthernBobwhite_ScaffoldedDeNovo_contig_2520	54195	AP1S3
ENSGALT00000010998	NorthernBobwhite_ScaffoldedDeNovo_contig_9821	52228	AP2A2
ENSGALT00000013739	NorthernBobwhite_ScaffoldedDeNovo_contig_8309	17565	AP2M1
ENSGALT00000008126	NorthernBobwhite_ScaffoldedDeNovo_contig_2722	37734	AP3M1
ENSGALT00000005799	NorthernBobwhite_ScaffoldedDeNovo_contig_3708	42452	AP3M2
ENSGALT00000003691	NorthernBobwhite_ScaffoldedDeNovo_contig_1237	68824	AP3S1
ENSGALT00000040096	NorthernBobwhite_ScaffoldedDeNovo_contig_16564	9224	AP4B1
ENSGALT00000007624	NorthernBobwhite_ScaffoldedDeNovo_contig_71753	270	AP4E1
ENSGALT00000016156	NorthernBobwhite_ScaffoldedDeNovo_contig_38698	3685	AP4S1
ENSGALT00000006262	NorthernBobwhite_ScaffoldedDeNovo_contig_6038	26183	APBA2
ENSGALT00000004840	NorthernBobwhite_ScaffoldedDeNovo_contig_10112	3011	APBA2BP
ENSGALT00000045523	NorthernBobwhite_ScaffoldedDeNovo_contig_202051	44	APBB1
ENSGALT00000023068	NorthernBobwhite_ScaffoldedDeNovo_contig_794	10182	APBB2
ENSGALT00000001704	NorthernBobwhite_ScaffoldedDeNovo_contig_14111	4138	APBB3
ENSGALT00000046206	NorthernBobwhite_ScaffoldedDeNovo_contig_10180	120	APC2
ENSGALT00000001315	NorthernBobwhite_ScaffoldedDeNovo_contig_698	12257	APCDD1
ENSGALT00000004064	NorthernBobwhite_ScaffoldedDeNovo_contig_12478	44851	APH1A
ENSGALT00000012953	NorthernBobwhite_ScaffoldedDeNovo_contig_20726	5117	API5
ENSGALT00000012705	NorthernBobwhite_ScaffoldedDeNovo_contig_24743	42093	APIP
ENSGALT00000041394	NorthernBobwhite_ScaffoldedDeNovo_contig_8671	32844	APITD1
ENSGALT00000014234	NorthernBobwhite_ScaffoldedDeNovo_contig_19260	2343	APLF
ENSGALT00000007728	NorthernBobwhite_ScaffoldedDeNovo_contig_7547	34504	APLNR
ENSGALT00000001897	NorthernBobwhite_ScaffoldedDeNovo_contig_10339	2405	APLP2
ENSGALT00000001898	NorthernBobwhite_ScaffoldedDeNovo_contig_10339	2405	APLP2
ENSGALT00000001988	NorthernBobwhite_ScaffoldedDeNovo_contig_7169	45552	APLP2
ENSGALT00000014091	NorthernBobwhite_ScaffoldedDeNovo_contig_9901	1050	APMAP
ENSGALT00000011524	NorthernBobwhite_ScaffoldedDeNovo_contig_166	63191	APOA1
ENSGALT00000023212	NorthernBobwhite_ScaffoldedDeNovo_contig_166	69185	APOA5
ENSGALT00000011516	NorthernBobwhite_ScaffoldedDeNovo_contig_166	66628	APOAIV
ENSGALT00000005108	NorthernBobwhite_ScaffoldedDeNovo_contig_692	72227	APOBEC2
ENSGALT00000033587	NorthernBobwhite_ScaffoldedDeNovo_contig_10166	3900	APOBEC4
ENSGALT00000011326	NorthernBobwhite_ScaffoldedDeNovo_contig_2244	127444	APOD
ENSGALT00000006308	NorthernBobwhite_ScaffoldedDeNovo_contig_3647	15170	APOH
ENSGALT00000019230	NorthernBobwhite_ScaffoldedDeNovo_contig_30015	18519	APOLD1
ENSGALT00000026366	NorthernBobwhite_ScaffoldedDeNovo_contig_138840	25	APOO
ENSGALT00000018795	NorthernBobwhite_ScaffoldedDeNovo_contig_147976	408	APOPT1
ENSGALT00000024419	NorthernBobwhite_ScaffoldedDeNovo_contig_7434	7632	APOVLDLII
ENSGALT00000001896	NorthernBobwhite_ScaffoldedDeNovo_contig_21187	19409	APP
ENSGALT00000036803	NorthernBobwhite_ScaffoldedDeNovo_contig_21187	19409	APP
ENSGALT00000008517	NorthernBobwhite_ScaffoldedDeNovo_contig_12911	4142	APPBP2
ENSGALT00000044339	NorthernBobwhite_ScaffoldedDeNovo_contig_1930	11670	APRT
ENSGALT00000003023	NorthernBobwhite_ScaffoldedDeNovo_contig_2026	60347	APTX
ENSGALT00000008364	NorthernBobwhite_ScaffoldedDeNovo_contig_1288	79309	AQP1
ENSGALT00000046103	NorthernBobwhite_ScaffoldedDeNovo_contig_108996	30	AQP10
ENSGALT00000002458	NorthernBobwhite_ScaffoldedDeNovo_contig_6676	36267	AQP11
ENSGALT00000010387	NorthernBobwhite_ScaffoldedDeNovo_contig_4545	66	AQP12
ENSGALT00000016693	NorthernBobwhite_ScaffoldedDeNovo_contig_27574	4951	AQP2
ENSGALT00000003868	NorthernBobwhite_ScaffoldedDeNovo_contig_3250	88571	AQP3
ENSGALT00000036809	NorthernBobwhite_ScaffoldedDeNovo_contig_1309	15469	AQP4
ENSGALT00000004288	NorthernBobwhite_ScaffoldedDeNovo_contig_38357	421	AQP5
ENSGALT00000003866	NorthernBobwhite_ScaffoldedDeNovo_contig_3250	16572	AQP7
ENSGALT00000009629	NorthernBobwhite_ScaffoldedDeNovo_contig_12991	10993	AQP8
ENSGALT00000006776	NorthernBobwhite_ScaffoldedDeNovo_contig_8021	11159	AQP9
ENSGALT00000023171	NorthernBobwhite_ScaffoldedDeNovo_contig_10486	17427	ARAP2
ENSGALT00000026027	NorthernBobwhite_ScaffoldedDeNovo_contig_24265	8361	ARC
ENSGALT00000017665	NorthernBobwhite_ScaffoldedDeNovo_contig_145	6923	AREG
ENSGALT00000043397	NorthernBobwhite_ScaffoldedDeNovo_contig_120365	193	ARF GTPASE ACTIVATING PROTEIN
ENSGALT00000039166	NorthernBobwhite_ScaffoldedDeNovo_contig_22261	8124	ARF1
ENSGALT00000009021	NorthernBobwhite_ScaffoldedDeNovo_contig_351	55644	ARF5
ENSGALT00000045497	NorthernBobwhite_ScaffoldedDeNovo_contig_5454	5557	ARF6
ENSGALT00000009286	NorthernBobwhite_ScaffoldedDeNovo_contig_10992	3760	ARFGAP1
ENSGALT00000013425	NorthernBobwhite_ScaffoldedDeNovo_contig_3211	35563	ARFGAP2
ENSGALT00000022879	NorthernBobwhite_ScaffoldedDeNovo_contig_34931	2101	ARFGAP3
ENSGALT00000016433	NorthernBobwhite_ScaffoldedDeNovo_contig_3648	1973	ARFIP1
ENSGALT00000036378	NorthernBobwhite_ScaffoldedDeNovo_contig_57932	2402	ARFIP2
ENSGALT00000009849	NorthernBobwhite_ScaffoldedDeNovo_contig_11761	59676	ARFRP1
ENSGALT00000015501	NorthernBobwhite_ScaffoldedDeNovo_contig_6796	7504	ARG2
ENSGALT00000027231	NorthernBobwhite_ScaffoldedDeNovo_contig_6755	153266	ARGLU1
ENSGALT00000015838	NorthernBobwhite_ScaffoldedDeNovo_contig_20523	678	ARHGAP11A
ENSGALT00000011742	NorthernBobwhite_ScaffoldedDeNovo_contig_25258	8	ARHGAP12
ENSGALT00000037826	NorthernBobwhite_ScaffoldedDeNovo_contig_5452	67230	ARHGAP15
ENSGALT00000009586	NorthernBobwhite_ScaffoldedDeNovo_contig_14565	32351	ARHGAP17
ENSGALT00000022702	NorthernBobwhite_ScaffoldedDeNovo_contig_128325	21	ARHGAP18
ENSGALT00000033235	NorthernBobwhite_ScaffoldedDeNovo_contig_6624	1156	ARHGAP19
ENSGALT00000027700	NorthernBobwhite_ScaffoldedDeNovo_contig_14267	3121	ARHGAP20
ENSGALT00000012520	NorthernBobwhite_ScaffoldedDeNovo_contig_11519	9645	ARHGAP21
ENSGALT00000009904	NorthernBobwhite_ScaffoldedDeNovo_contig_5455	12884	ARHGAP22
ENSGALT00000043700	NorthernBobwhite_ScaffoldedDeNovo_contig_57401	841	ARHGAP23
ENSGALT00000018134	NorthernBobwhite_ScaffoldedDeNovo_contig_21496	79365	ARHGAP24
ENSGALT00000000184	NorthernBobwhite_ScaffoldedDeNovo_contig_25951	1554	ARHGAP25
ENSGALT00000023805	NorthernBobwhite_ScaffoldedDeNovo_contig_30409	904	ARHGAP28
ENSGALT00000009113	NorthernBobwhite_ScaffoldedDeNovo_contig_4948	50849	ARHGAP29
ENSGALT00000044091	NorthernBobwhite_ScaffoldedDeNovo_contig_4948	8047	ARHGAP29
ENSGALT00000024321	NorthernBobwhite_ScaffoldedDeNovo_contig_25612	21494	ARHGAP31
ENSGALT00000019115	NorthernBobwhite_ScaffoldedDeNovo_contig_50785	71	ARHGAP35
ENSGALT00000011597	NorthernBobwhite_ScaffoldedDeNovo_contig_137	51094	ARHGAP36
ENSGALT00000044714	NorthernBobwhite_ScaffoldedDeNovo_contig_38155	622	ARHGAP39
ENSGALT00000016236	NorthernBobwhite_ScaffoldedDeNovo_contig_13859	37692	ARHGAP5
ENSGALT00000036617	NorthernBobwhite_ScaffoldedDeNovo_contig_7572	42437	ARHGAP6
ENSGALT00000022983	NorthernBobwhite_ScaffoldedDeNovo_contig_11806	8566	ARHGAP8
ENSGALT00000013753	NorthernBobwhite_ScaffoldedDeNovo_contig_22909	3774	ARHGDIA
ENSGALT00000043696	NorthernBobwhite_ScaffoldedDeNovo_contig_11104	78763	ARHGDIG
ENSGALT00000026373	NorthernBobwhite_ScaffoldedDeNovo_contig_481	14562	ARHGEF10
ENSGALT00000040676	NorthernBobwhite_ScaffoldedDeNovo_contig_22492	2102	ARHGEF10L
ENSGALT00000010780	NorthernBobwhite_ScaffoldedDeNovo_contig_13090	6089	ARHGEF12
ENSGALT00000001585	NorthernBobwhite_ScaffoldedDeNovo_contig_2035	147977	ARHGEF16
ENSGALT00000027999	NorthernBobwhite_ScaffoldedDeNovo_contig_11259	1777	ARHGEF17
ENSGALT00000005655	NorthernBobwhite_ScaffoldedDeNovo_contig_5034	49122	ARHGEF18
ENSGALT00000011071	NorthernBobwhite_ScaffoldedDeNovo_contig_5551	6584	ARHGEF2
ENSGALT00000016857	NorthernBobwhite_ScaffoldedDeNovo_contig_9806	48719	ARHGEF26
ENSGALT00000008805	NorthernBobwhite_ScaffoldedDeNovo_contig_7619	20722	ARHGEF3
ENSGALT00000021597	NorthernBobwhite_ScaffoldedDeNovo_contig_7965	8465	ARHGEF33
ENSGALT00000003431	NorthernBobwhite_ScaffoldedDeNovo_contig_11936	5537	ARHGEF4
ENSGALT00000027929	NorthernBobwhite_ScaffoldedDeNovo_contig_13855	44242	ARHGEF5
ENSGALT00000010390	NorthernBobwhite_ScaffoldedDeNovo_contig_26619	4163	ARHGEF6
ENSGALT00000027224	NorthernBobwhite_ScaffoldedDeNovo_contig_8554	3220	ARHGEF7
ENSGALT00000012303	NorthernBobwhite_ScaffoldedDeNovo_contig_7779	73692	ARHGEF9
ENSGALT00000009379	NorthernBobwhite_ScaffoldedDeNovo_contig_14349	12604	ARID/BRIGHT DNA-BINDING DOMAIN
ENSGALT00000022247	NorthernBobwhite_ScaffoldedDeNovo_contig_21734	10009	ARID/BRIGHT DNA-BINDING DOMAIN / PROTEIN OF UNKNOWN FUNCTION DUF3518 / ARMADILLO-TYPE FOLD
ENSGALT00000000486	NorthernBobwhite_ScaffoldedDeNovo_contig_5866	9825	ARID1A
ENSGALT00000045538	NorthernBobwhite_ScaffoldedDeNovo_contig_5866	11171	ARID1B
ENSGALT00000044479	NorthernBobwhite_ScaffoldedDeNovo_contig_43131	9980	ARID3A
ENSGALT00000002097	NorthernBobwhite_ScaffoldedDeNovo_contig_24017	2915	ARID3B
ENSGALT00000000022	NorthernBobwhite_ScaffoldedDeNovo_contig_935	64181	ARID4A
ENSGALT00000000385	NorthernBobwhite_ScaffoldedDeNovo_contig_1268	185119	ARID4B
ENSGALT00000004734	NorthernBobwhite_ScaffoldedDeNovo_contig_13236	30547	ARID5B
ENSGALT00000002788	NorthernBobwhite_ScaffoldedDeNovo_contig_45864	1618	ARIH1
ENSGALT00000011269	NorthernBobwhite_ScaffoldedDeNovo_contig_7331	24515	ARIH2
ENSGALT00000019040	NorthernBobwhite_ScaffoldedDeNovo_contig_2977	20840	ARL1
ENSGALT00000005313	NorthernBobwhite_ScaffoldedDeNovo_contig_21810	19706	ARL10
ENSGALT00000036475	NorthernBobwhite_ScaffoldedDeNovo_contig_5385	45157	ARL11
ENSGALT00000010721	NorthernBobwhite_ScaffoldedDeNovo_contig_25682	227	ARL13A
ENSGALT00000023137	NorthernBobwhite_ScaffoldedDeNovo_contig_17377	18492	ARL13A
ENSGALT00000015530	NorthernBobwhite_ScaffoldedDeNovo_contig_1973	15639	ARL14
ENSGALT00000041373	NorthernBobwhite_ScaffoldedDeNovo_contig_50283	17733	ARL14EPL
ENSGALT00000024048	NorthernBobwhite_ScaffoldedDeNovo_contig_27587	26859	ARL15
ENSGALT00000011651	NorthernBobwhite_ScaffoldedDeNovo_contig_17717	46053	ARL16
ENSGALT00000004953	NorthernBobwhite_ScaffoldedDeNovo_contig_16703	835	ARL2
ENSGALT00000013061	NorthernBobwhite_ScaffoldedDeNovo_contig_11034	22037	ARL3
ENSGALT00000043011	NorthernBobwhite_ScaffoldedDeNovo_contig_47	1561	ARL4A
ENSGALT00000033786	NorthernBobwhite_ScaffoldedDeNovo_contig_3492	57922	ARL4C
ENSGALT00000020434	NorthernBobwhite_ScaffoldedDeNovo_contig_23937	3467	ARL5A
ENSGALT00000013939	NorthernBobwhite_ScaffoldedDeNovo_contig_30786	5876	ARL5B
ENSGALT00000030410	NorthernBobwhite_ScaffoldedDeNovo_contig_21514	1677	ARL6
ENSGALT00000010969	NorthernBobwhite_ScaffoldedDeNovo_contig_6221	14994	ARL6IP1
ENSGALT00000005833	NorthernBobwhite_ScaffoldedDeNovo_contig_55058	244	ARL6IP4
ENSGALT00000028126	NorthernBobwhite_ScaffoldedDeNovo_contig_14538	16780	ARL6IP5
ENSGALT00000013532	NorthernBobwhite_ScaffoldedDeNovo_contig_3306	13062	ARL8A
ENSGALT00000040899	NorthernBobwhite_ScaffoldedDeNovo_contig_3698	13434	ARL8A
ENSGALT00000045113	NorthernBobwhite_ScaffoldedDeNovo_contig_2710	149306	ARL9
ENSGALT00000022554	NorthernBobwhite_ScaffoldedDeNovo_contig_26521	1146	ARMADILLO-TYPE FOLD
ENSGALT00000036616	NorthernBobwhite_ScaffoldedDeNovo_contig_35344	2544	ARMADILLO-TYPE FOLD
ENSGALT00000026739	NorthernBobwhite_ScaffoldedDeNovo_contig_35344	2548	ARMADILLO-TYPE FOLD
ENSGALT00000036646	NorthernBobwhite_ScaffoldedDeNovo_contig_35344	2546	ARMADILLO-TYPE FOLD
ENSGALT00000026159	NorthernBobwhite_ScaffoldedDeNovo_contig_35344	2476	ARMADILLO-TYPE FOLD
ENSGALT00000044809	NorthernBobwhite_ScaffoldedDeNovo_contig_29158	822	ARMADILLO-TYPE FOLD
ENSGALT00000024677	NorthernBobwhite_ScaffoldedDeNovo_contig_8245	2956	ARMC2
ENSGALT00000004779	NorthernBobwhite_ScaffoldedDeNovo_contig_9619	1080	ARMC6
ENSGALT00000012930	NorthernBobwhite_ScaffoldedDeNovo_contig_6769	60148	ARMC7
ENSGALT00000001788	NorthernBobwhite_ScaffoldedDeNovo_contig_22835	6305	ARMC8
ENSGALT00000010400	NorthernBobwhite_ScaffoldedDeNovo_contig_22176	32	ARNT2
ENSGALT00000008634	NorthernBobwhite_ScaffoldedDeNovo_contig_11503	21099	ARNTL
ENSGALT00000022820	NorthernBobwhite_ScaffoldedDeNovo_contig_1197	1327	ARNTL2
ENSGALT00000044244	NorthernBobwhite_ScaffoldedDeNovo_contig_242	17617	Aromatic amino acid beta-eliminating lyase/threonine aldolase, Pyridoxal phosphate-dependent transferaseDEPENDENT TRANSFERASE
ENSGALT00000020814	NorthernBobwhite_ScaffoldedDeNovo_contig_4085	2754	AROMATIC AMINO ACID HYDROXYLASE C-TERMINAL
ENSGALT00000044881	NorthernBobwhite_ScaffoldedDeNovo_contig_3523	32205	ARP2/3 COMPLEX, 34KDA SUBUNIT (P34-ARC)
ENSGALT00000040792	NorthernBobwhite_ScaffoldedDeNovo_contig_17209	30567	ARPC1A
ENSGALT00000007478	NorthernBobwhite_ScaffoldedDeNovo_contig_17209	25126	ARPC1B
ENSGALT00000018675	NorthernBobwhite_ScaffoldedDeNovo_contig_3523	29888	ARPC2
ENSGALT00000006056	NorthernBobwhite_ScaffoldedDeNovo_contig_66466	432	ARPC3
ENSGALT00000010814	NorthernBobwhite_ScaffoldedDeNovo_contig_18263	16198	ARPC4
ENSGALT00000039377	NorthernBobwhite_ScaffoldedDeNovo_contig_10166	5942	ARPC5
ENSGALT00000039081	NorthernBobwhite_ScaffoldedDeNovo_contig_2321	61221	ARPP19
ENSGALT00000019676	NorthernBobwhite_ScaffoldedDeNovo_contig_73916	2477	ARPP21
ENSGALT00000006763	NorthernBobwhite_ScaffoldedDeNovo_contig_13766	975	ARR3
ENSGALT00000013811	NorthernBobwhite_ScaffoldedDeNovo_contig_3782	40267	ARRDC1
ENSGALT00000005581	NorthernBobwhite_ScaffoldedDeNovo_contig_5034	87206	ARRDC2
ENSGALT00000015860	NorthernBobwhite_ScaffoldedDeNovo_contig_37610	2265	ARSA
ENSGALT00000038612	NorthernBobwhite_ScaffoldedDeNovo_contig_7035	27784	ARSB
ENSGALT00000026880	NorthernBobwhite_ScaffoldedDeNovo_contig_3470	21783	ARSD
ENSGALT00000026882	NorthernBobwhite_ScaffoldedDeNovo_contig_3470	1423	ARSE
ENSGALT00000006665	NorthernBobwhite_ScaffoldedDeNovo_contig_1654	11604	ARSG
ENSGALT00000026860	NorthernBobwhite_ScaffoldedDeNovo_contig_31960	1177	ARSH
ENSGALT00000009011	NorthernBobwhite_ScaffoldedDeNovo_contig_1349	105002	ARSI
ENSGALT00000019613	NorthernBobwhite_ScaffoldedDeNovo_contig_10691	23788	ARSJ
ENSGALT00000010396	NorthernBobwhite_ScaffoldedDeNovo_contig_56787	2284	ART1
ENSGALT00000020579	NorthernBobwhite_ScaffoldedDeNovo_contig_26929	444	ART1
ENSGALT00000019175	NorthernBobwhite_ScaffoldedDeNovo_contig_2911	18976	ART4
ENSGALT00000031354	NorthernBobwhite_ScaffoldedDeNovo_contig_56787	1985	ART7B
ENSGALT00000045088	NorthernBobwhite_ScaffoldedDeNovo_contig_56787	2268	ART7C
ENSGALT00000031842	NorthernBobwhite_ScaffoldedDeNovo_contig_61720	475	ARV1
ENSGALT00000003170	NorthernBobwhite_ScaffoldedDeNovo_contig_1598	18268	ARVCF
ENSGALT00000044710	NorthernBobwhite_ScaffoldedDeNovo_contig_24817	3709	ARX
ENSGALT00000008831	NorthernBobwhite_ScaffoldedDeNovo_contig_13594	16357	ARYL HYDROCARBON RECEPTOR-LIKE
ENSGALT00000043802	NorthernBobwhite_ScaffoldedDeNovo_contig_14304	8816	ARYLACETAMIDE DEACETYLASE-LIKE 4-LIKE
ENSGALT00000043659	NorthernBobwhite_ScaffoldedDeNovo_contig_28546	19	ASAP3
ENSGALT00000006793	NorthernBobwhite_ScaffoldedDeNovo_contig_18209	6595	ASB1
ENSGALT00000021776	NorthernBobwhite_ScaffoldedDeNovo_contig_8331	41431	ASB10
ENSGALT00000026728	NorthernBobwhite_ScaffoldedDeNovo_contig_35110	430	ASB11
ENSGALT00000012279	NorthernBobwhite_ScaffoldedDeNovo_contig_33366	1067	ASB12
ENSGALT00000013685	NorthernBobwhite_ScaffoldedDeNovo_contig_5712	23889	ASB13
ENSGALT00000008882	NorthernBobwhite_ScaffoldedDeNovo_contig_351	21739	ASB14
ENSGALT00000014328	NorthernBobwhite_ScaffoldedDeNovo_contig_439	220000	ASB15
ENSGALT00000006363	NorthernBobwhite_ScaffoldedDeNovo_contig_3784	75924	ASB18
ENSGALT00000017687	NorthernBobwhite_ScaffoldedDeNovo_contig_24579	24205	ASB2
ENSGALT00000015772	NorthernBobwhite_ScaffoldedDeNovo_contig_6903	7828	ASB4
ENSGALT00000017617	NorthernBobwhite_ScaffoldedDeNovo_contig_31799	3884	ASB5
ENSGALT00000006983	NorthernBobwhite_ScaffoldedDeNovo_contig_355	104	ASB6
ENSGALT00000011525	NorthernBobwhite_ScaffoldedDeNovo_contig_4475	254694	ASB7
ENSGALT00000021679	NorthernBobwhite_ScaffoldedDeNovo_contig_13228	110	ASB8
ENSGALT00000026730	NorthernBobwhite_ScaffoldedDeNovo_contig_13030	242	ASB9
ENSGALT00000007036	NorthernBobwhite_ScaffoldedDeNovo_contig_1652	313297	ASCC1
ENSGALT00000007247	NorthernBobwhite_ScaffoldedDeNovo_contig_2546	121578	ASCC1
ENSGALT00000013083	NorthernBobwhite_ScaffoldedDeNovo_contig_4218	1016	ASCC2
ENSGALT00000035544	NorthernBobwhite_ScaffoldedDeNovo_contig_24907	5276	ASCC3
ENSGALT00000018587	NorthernBobwhite_ScaffoldedDeNovo_contig_4696	89847	ASCL2
ENSGALT00000030574	NorthernBobwhite_ScaffoldedDeNovo_contig_1630	90655	ASCL4
ENSGALT00000037366	NorthernBobwhite_ScaffoldedDeNovo_contig_5945	5034	ASF1A
ENSGALT00000010093	NorthernBobwhite_ScaffoldedDeNovo_contig_7403	37598	ASIC1
ENSGALT00000000499	NorthernBobwhite_ScaffoldedDeNovo_contig_144210	109	ASIC2
ENSGALT00000018356	NorthernBobwhite_ScaffoldedDeNovo_contig_8985	15888	ASIC4
ENSGALT00000034646	NorthernBobwhite_ScaffoldedDeNovo_contig_29395	519	ASIP
ENSGALT00000044768	NorthernBobwhite_ScaffoldedDeNovo_contig_172920	1	ASIP
ENSGALT00000039936	NorthernBobwhite_ScaffoldedDeNovo_contig_33251	26721	ASL1
ENSGALT00000004043	NorthernBobwhite_ScaffoldedDeNovo_contig_34282	2403	ASL2
ENSGALT00000026923	NorthernBobwhite_ScaffoldedDeNovo_contig_15618	2006	ASMT
ENSGALT00000003781	NorthernBobwhite_ScaffoldedDeNovo_contig_29822	2273	ASNSD1
ENSGALT00000007439	NorthernBobwhite_ScaffoldedDeNovo_contig_11748	34214	ASPA
ENSGALT00000045880	NorthernBobwhite_ScaffoldedDeNovo_contig_2063	50261	ASPARTYL BETA-HYDROXYLASE/TRIADIN DOMAIN
ENSGALT00000018877	NorthernBobwhite_ScaffoldedDeNovo_contig_15526	52779	ASPG
ENSGALT00000038626	NorthernBobwhite_ScaffoldedDeNovo_contig_18583	14740	ASPHD2
ENSGALT00000022611	NorthernBobwhite_ScaffoldedDeNovo_contig_15955	46291	ASPR
ENSGALT00000025705	NorthernBobwhite_ScaffoldedDeNovo_contig_1311	8495	ASRGL1
ENSGALT00000018930	NorthernBobwhite_ScaffoldedDeNovo_contig_6001	166	ASTE1
ENSGALT00000013089	NorthernBobwhite_ScaffoldedDeNovo_contig_24893	11959	ASTL
ENSGALT00000011395	NorthernBobwhite_ScaffoldedDeNovo_contig_3973	2429	ASTN2
ENSGALT00000010675	NorthernBobwhite_ScaffoldedDeNovo_contig_6157	4733	ASXL1
ENSGALT00000024548	NorthernBobwhite_ScaffoldedDeNovo_contig_1691	6891	ASXL2
ENSGALT00000026678	NorthernBobwhite_ScaffoldedDeNovo_contig_13526	2547	ASXL2
ENSGALT00000036793	NorthernBobwhite_ScaffoldedDeNovo_contig_13526	2547	ASXL2
ENSGALT00000024516	NorthernBobwhite_ScaffoldedDeNovo_contig_24903	3601	ASXL3
ENSGALT00000005787	NorthernBobwhite_ScaffoldedDeNovo_contig_10447	37265	ATAD1
ENSGALT00000005217	NorthernBobwhite_ScaffoldedDeNovo_contig_11983	19020	ATAD5
ENSGALT00000029631	NorthernBobwhite_ScaffoldedDeNovo_contig_4094	40940	ATF1
ENSGALT00000015107	NorthernBobwhite_ScaffoldedDeNovo_contig_13647	3346	ATF2
ENSGALT00000033263	NorthernBobwhite_ScaffoldedDeNovo_contig_1300	18930	ATF2
ENSGALT00000043027	NorthernBobwhite_ScaffoldedDeNovo_contig_38584	3692	ATF3
ENSGALT00000037892	NorthernBobwhite_ScaffoldedDeNovo_contig_4291	8988	ATF4
ENSGALT00000040110	NorthernBobwhite_ScaffoldedDeNovo_contig_10560	52604	ATF6
ENSGALT00000004807	NorthernBobwhite_ScaffoldedDeNovo_contig_138455	141	ATF7
ENSGALT00000019288	NorthernBobwhite_ScaffoldedDeNovo_contig_8226	18580	ATF7IP
ENSGALT00000044359	NorthernBobwhite_ScaffoldedDeNovo_contig_8226	18582	ATF7IP
ENSGALT00000043880	NorthernBobwhite_ScaffoldedDeNovo_contig_2052	144879	ATG10
ENSGALT00000003696	NorthernBobwhite_ScaffoldedDeNovo_contig_1237	99927	ATG12
ENSGALT00000019842	NorthernBobwhite_ScaffoldedDeNovo_contig_9501	8334	ATG14
ENSGALT00000002475	NorthernBobwhite_ScaffoldedDeNovo_contig_9905	82694	ATG16L1
ENSGALT00000018063	NorthernBobwhite_ScaffoldedDeNovo_contig_24422	18403	ATG2B
ENSGALT00000024530	NorthernBobwhite_ScaffoldedDeNovo_contig_2630	3301	ATG3
ENSGALT00000013477	NorthernBobwhite_ScaffoldedDeNovo_contig_14669	21005	ATG4A
ENSGALT00000010179	NorthernBobwhite_ScaffoldedDeNovo_contig_1292	119814	ATG4B
ENSGALT00000017894	NorthernBobwhite_ScaffoldedDeNovo_contig_4980	109538	ATG4C
ENSGALT00000024823	NorthernBobwhite_ScaffoldedDeNovo_contig_7186	22977	ATG5
ENSGALT00000045965	NorthernBobwhite_ScaffoldedDeNovo_contig_9514	95675	ATG5
ENSGALT00000019038	NorthernBobwhite_ScaffoldedDeNovo_contig_2603	439	ATG9A
ENSGALT00000006739	NorthernBobwhite_ScaffoldedDeNovo_contig_24666	1825	ATHL1
ENSGALT00000020162	NorthernBobwhite_ScaffoldedDeNovo_contig_11652	43559	ATL1
ENSGALT00000013868	NorthernBobwhite_ScaffoldedDeNovo_contig_11803	2879	ATL2
ENSGALT00000021972	NorthernBobwhite_ScaffoldedDeNovo_contig_22939	2538	ATMIN
ENSGALT00000023476	NorthernBobwhite_ScaffoldedDeNovo_contig_2093	34310	ATN1
ENSGALT00000006264	NorthernBobwhite_ScaffoldedDeNovo_contig_19639	106637	ATOH7
ENSGALT00000006637	NorthernBobwhite_ScaffoldedDeNovo_contig_33501	824	ATOX1
ENSGALT00000027031	NorthernBobwhite_ScaffoldedDeNovo_contig_18792	16710	ATP10A
ENSGALT00000002539	NorthernBobwhite_ScaffoldedDeNovo_contig_11540	50770	ATP10B
ENSGALT00000027187	NorthernBobwhite_ScaffoldedDeNovo_contig_167564	545	ATP11A
ENSGALT00000011622	NorthernBobwhite_ScaffoldedDeNovo_contig_1094	87123	ATP13A5
ENSGALT00000024583	NorthernBobwhite_ScaffoldedDeNovo_contig_16446	1047	ATP1B1
ENSGALT00000036926	NorthernBobwhite_ScaffoldedDeNovo_contig_16446	1045	ATP1B1
ENSGALT00000004364	NorthernBobwhite_ScaffoldedDeNovo_contig_178354	10	ATP1B3
ENSGALT00000039082	NorthernBobwhite_ScaffoldedDeNovo_contig_22916	16593	ATP1B4
ENSGALT00000002375	NorthernBobwhite_ScaffoldedDeNovo_contig_11123	14655	ATP2A3
ENSGALT00000018372	NorthernBobwhite_ScaffoldedDeNovo_contig_16678	28853	ATP2B1
ENSGALT00000038341	NorthernBobwhite_ScaffoldedDeNovo_contig_16678	28847	ATP2B1
ENSGALT00000007715	NorthernBobwhite_ScaffoldedDeNovo_contig_6234	19729	ATP2B2
ENSGALT00000027159	NorthernBobwhite_ScaffoldedDeNovo_contig_16582	2046	ATP4B
ENSGALT00000002698	NorthernBobwhite_ScaffoldedDeNovo_contig_14044	11399	ATP5A1
ENSGALT00000039585	NorthernBobwhite_ScaffoldedDeNovo_contig_25570	6238	ATP5A1W
ENSGALT00000036114	NorthernBobwhite_ScaffoldedDeNovo_contig_62051	5643	ATP5B
ENSGALT00000010913	NorthernBobwhite_ScaffoldedDeNovo_contig_15370	4054	ATP5C1
ENSGALT00000046192	NorthernBobwhite_ScaffoldedDeNovo_contig_54037	34	ATP5D
ENSGALT00000002026	NorthernBobwhite_ScaffoldedDeNovo_contig_58933	5248	ATP5G1
ENSGALT00000046236	NorthernBobwhite_ScaffoldedDeNovo_contig_39009	172	ATP5G2
ENSGALT00000015106	NorthernBobwhite_ScaffoldedDeNovo_contig_1300	46383	ATP5G3
ENSGALT00000012869	NorthernBobwhite_ScaffoldedDeNovo_contig_4889	4753	ATP5H
ENSGALT00000025402	NorthernBobwhite_ScaffoldedDeNovo_contig_317	415	ATP5J
ENSGALT00000007063	NorthernBobwhite_ScaffoldedDeNovo_contig_4690	26788	ATP5J2
ENSGALT00000025792	NorthernBobwhite_ScaffoldedDeNovo_contig_13940	8485	ATP5O
ENSGALT00000020080	NorthernBobwhite_ScaffoldedDeNovo_contig_12527	18764	ATP5S
ENSGALT00000029088	NorthernBobwhite_ScaffoldedDeNovo_contig_140	11554	ATP6
ENSGALT00000014357	NorthernBobwhite_ScaffoldedDeNovo_contig_239	5754	ATP6AP1
ENSGALT00000026187	NorthernBobwhite_ScaffoldedDeNovo_contig_1683	1940	ATP6AP2
ENSGALT00000036654	NorthernBobwhite_ScaffoldedDeNovo_contig_1683	332	ATP6AP2
ENSGALT00000016414	NorthernBobwhite_ScaffoldedDeNovo_contig_10971	115194	ATP6V0B
ENSGALT00000015018	NorthernBobwhite_ScaffoldedDeNovo_contig_14920	15814	ATP6V0C
ENSGALT00000003500	NorthernBobwhite_ScaffoldedDeNovo_contig_12135	82897	ATP6V0D1
ENSGALT00000046054	NorthernBobwhite_ScaffoldedDeNovo_contig_12135	95724	ATP6V0D1
ENSGALT00000025580	NorthernBobwhite_ScaffoldedDeNovo_contig_14549	24269	ATP6V0D2
ENSGALT00000045816	NorthernBobwhite_ScaffoldedDeNovo_contig_8931	30993	ATP6V0E1
ENSGALT00000033256	NorthernBobwhite_ScaffoldedDeNovo_contig_3493	62656	ATP6V0E2
ENSGALT00000023895	NorthernBobwhite_ScaffoldedDeNovo_contig_5409	96101	ATP6V1A
ENSGALT00000023896	NorthernBobwhite_ScaffoldedDeNovo_contig_5409	96101	ATP6V1A
ENSGALT00000002628	NorthernBobwhite_ScaffoldedDeNovo_contig_127	8976	ATP6V1B2
ENSGALT00000025883	NorthernBobwhite_ScaffoldedDeNovo_contig_5356	32573	ATP6V1C1
ENSGALT00000026534	NorthernBobwhite_ScaffoldedDeNovo_contig_5039	44439	ATP6V1C2
ENSGALT00000015588	NorthernBobwhite_ScaffoldedDeNovo_contig_8162	9869	ATP6V1D
ENSGALT00000021281	NorthernBobwhite_ScaffoldedDeNovo_contig_21562	8073	ATP6V1E1
ENSGALT00000011643	NorthernBobwhite_ScaffoldedDeNovo_contig_16272	61488	ATP6V1G1
ENSGALT00000003456	NorthernBobwhite_ScaffoldedDeNovo_contig_196	689	ATP6V1G3
ENSGALT00000022162	NorthernBobwhite_ScaffoldedDeNovo_contig_31313	743	ATP6V1H
ENSGALT00000012828	NorthernBobwhite_ScaffoldedDeNovo_contig_10653	19483	ATP7A
ENSGALT00000027501	NorthernBobwhite_ScaffoldedDeNovo_contig_3169	43809	ATP7B
ENSGALT00000023022	NorthernBobwhite_ScaffoldedDeNovo_contig_365	20129	ATP8A1
ENSGALT00000017005	NorthernBobwhite_ScaffoldedDeNovo_contig_11632	65999	ATPAF1
ENSGALT00000007880	NorthernBobwhite_ScaffoldedDeNovo_contig_16096	11853	ATPAF2
ENSGALT00000015948	NorthernBobwhite_ScaffoldedDeNovo_contig_13749	5038	ATPBD4
ENSGALT00000007442	NorthernBobwhite_ScaffoldedDeNovo_contig_4668	91763	ATRIP
ENSGALT00000014903	NorthernBobwhite_ScaffoldedDeNovo_contig_46115	10523	ATRNL1
ENSGALT00000012737	NorthernBobwhite_ScaffoldedDeNovo_contig_34978	34011	ATRX
ENSGALT00000020748	NorthernBobwhite_ScaffoldedDeNovo_contig_17176	10922	ATXN1
ENSGALT00000043828	NorthernBobwhite_ScaffoldedDeNovo_contig_14390	327	ATXN1L
ENSGALT00000017509	NorthernBobwhite_ScaffoldedDeNovo_contig_13903	4408	ATXN3
ENSGALT00000013172	NorthernBobwhite_ScaffoldedDeNovo_contig_142991	1	ATXN7L1
ENSGALT00000036231	NorthernBobwhite_ScaffoldedDeNovo_contig_212	5359	ATXN7L2
ENSGALT00000024542	NorthernBobwhite_ScaffoldedDeNovo_contig_36737	40697	AUH
ENSGALT00000033524	NorthernBobwhite_ScaffoldedDeNovo_contig_24311	8915	AURKA
ENSGALT00000002364	NorthernBobwhite_ScaffoldedDeNovo_contig_4599	25047	AURKAIP1
ENSGALT00000001731	NorthernBobwhite_ScaffoldedDeNovo_contig_3688	23113	AUTS2
ENSGALT00000003855	NorthernBobwhite_ScaffoldedDeNovo_contig_21688	12437	AVD-201
ENSGALT00000034429	NorthernBobwhite_ScaffoldedDeNovo_contig_58298	1	AVD-201
ENSGALT00000045176	NorthernBobwhite_ScaffoldedDeNovo_contig_12479	18982	AVEN
ENSGALT00000019928	NorthernBobwhite_ScaffoldedDeNovo_contig_4220	570	AVL9
ENSGALT00000022851	NorthernBobwhite_ScaffoldedDeNovo_contig_43006	5538	AVP
ENSGALT00000015460	NorthernBobwhite_ScaffoldedDeNovo_contig_42512	13106	AVPR2
ENSGALT00000039315	NorthernBobwhite_ScaffoldedDeNovo_contig_21688	20940	AVR2
ENSGALT00000035207	NorthernBobwhite_ScaffoldedDeNovo_contig_85917	1	AVT2R
ENSGALT00000012090	NorthernBobwhite_ScaffoldedDeNovo_contig_11104	6197	AXIN1
ENSGALT00000045356	NorthernBobwhite_ScaffoldedDeNovo_contig_11104	42473	AXIN1
ENSGALT00000006404	NorthernBobwhite_ScaffoldedDeNovo_contig_7335	90325	AXIN2
ENSGALT00000036606	NorthernBobwhite_ScaffoldedDeNovo_contig_16673	5420	AZIN1
ENSGALT00000040255	NorthernBobwhite_ScaffoldedDeNovo_contig_10058	57764	B2M
ENSGALT00000015525	NorthernBobwhite_ScaffoldedDeNovo_contig_1973	11604	B3GALNT1
ENSGALT00000017783	NorthernBobwhite_ScaffoldedDeNovo_contig_131	24564	B3GALT1
ENSGALT00000003906	NorthernBobwhite_ScaffoldedDeNovo_contig_3043	178913	B3GALT2
ENSGALT00000038911	NorthernBobwhite_ScaffoldedDeNovo_contig_6186	75954	B3GALT4
ENSGALT00000025981	NorthernBobwhite_ScaffoldedDeNovo_contig_5003	28177	B3GALT5
ENSGALT00000002878	NorthernBobwhite_ScaffoldedDeNovo_contig_12385	39460	B3GALT6
ENSGALT00000024318	NorthernBobwhite_ScaffoldedDeNovo_contig_84697	152	B3GAT1
ENSGALT00000034500	NorthernBobwhite_ScaffoldedDeNovo_contig_26430	14872	B3GAT1
ENSGALT00000025708	NorthernBobwhite_ScaffoldedDeNovo_contig_14467	64913	B3GAT2
ENSGALT00000014514	NorthernBobwhite_ScaffoldedDeNovo_contig_1333	12629	B3GNT2
ENSGALT00000044480	NorthernBobwhite_ScaffoldedDeNovo_contig_6619	16258	B3GNT4
ENSGALT00000014247	NorthernBobwhite_ScaffoldedDeNovo_contig_2687	14429	B3GNT5
ENSGALT00000044155	NorthernBobwhite_ScaffoldedDeNovo_contig_47326	650	B3GNT6
ENSGALT00000012478	NorthernBobwhite_ScaffoldedDeNovo_contig_22201	4383	B3GNT7
ENSGALT00000034432	NorthernBobwhite_ScaffoldedDeNovo_contig_13442	5908	B3GNT9
ENSGALT00000002182	NorthernBobwhite_ScaffoldedDeNovo_contig_24829	23895	B3GNTL1
ENSGALT00000021202	NorthernBobwhite_ScaffoldedDeNovo_contig_2975	49177	B4GALNT3
ENSGALT00000016418	NorthernBobwhite_ScaffoldedDeNovo_contig_2970	2791	B4GALT2
ENSGALT00000024311	NorthernBobwhite_ScaffoldedDeNovo_contig_4870	4778	B4GALT4
ENSGALT00000013071	NorthernBobwhite_ScaffoldedDeNovo_contig_5204	5001	B4GALT5
ENSGALT00000024447	NorthernBobwhite_ScaffoldedDeNovo_contig_21533	4065	B4GALT6
ENSGALT00000040958	NorthernBobwhite_ScaffoldedDeNovo_contig_40740	4473	B4GAL-T7
ENSGALT00000008174	NorthernBobwhite_ScaffoldedDeNovo_contig_68024	2498	B9D1
ENSGALT00000043890	NorthernBobwhite_ScaffoldedDeNovo_contig_6653	18551	BAALC
ENSGALT00000032735	NorthernBobwhite_ScaffoldedDeNovo_contig_3054	9292	BAAT
ENSGALT00000011815	NorthernBobwhite_ScaffoldedDeNovo_contig_8119	10843	BACE1
ENSGALT00000025995	NorthernBobwhite_ScaffoldedDeNovo_contig_5144	6544	BACE2
ENSGALT00000025160	NorthernBobwhite_ScaffoldedDeNovo_contig_12397	108536	BACH2
ENSGALT00000027228	NorthernBobwhite_ScaffoldedDeNovo_contig_2988	9347	BAFF
ENSGALT00000021488	NorthernBobwhite_ScaffoldedDeNovo_contig_19901	4	BAG1
ENSGALT00000015358	NorthernBobwhite_ScaffoldedDeNovo_contig_4281	8833	BAG3
ENSGALT00000043959	NorthernBobwhite_ScaffoldedDeNovo_contig_4281	8833	BAG3
ENSGALT00000005150	NorthernBobwhite_ScaffoldedDeNovo_contig_3644	20960	BAG4
ENSGALT00000018794	NorthernBobwhite_ScaffoldedDeNovo_contig_17732	9836	BAG5
ENSGALT00000045202	NorthernBobwhite_ScaffoldedDeNovo_contig_14184	3920	BAHCC1
ENSGALT00000045382	NorthernBobwhite_ScaffoldedDeNovo_contig_8628	28410	BAHD1
ENSGALT00000026039	NorthernBobwhite_ScaffoldedDeNovo_contig_13862	18413	BAI1
ENSGALT00000043928	NorthernBobwhite_ScaffoldedDeNovo_contig_20322	8988	BAI2
ENSGALT00000026069	NorthernBobwhite_ScaffoldedDeNovo_contig_3727	58883	BAI3
ENSGALT00000005611	NorthernBobwhite_ScaffoldedDeNovo_contig_21547	978	BAIAP2L1
ENSGALT00000020078	NorthernBobwhite_ScaffoldedDeNovo_contig_20021	16424	BAIAP2L2
ENSGALT00000044192	NorthernBobwhite_ScaffoldedDeNovo_contig_10674	4545	BAMBI
ENSGALT00000020085	NorthernBobwhite_ScaffoldedDeNovo_contig_33979	10004	BANK1
ENSGALT00000009439	NorthernBobwhite_ScaffoldedDeNovo_contig_3944	40802	BANP
ENSGALT00000006965	NorthernBobwhite_ScaffoldedDeNovo_contig_2436	25054	BAP1
ENSGALT00000043861	NorthernBobwhite_ScaffoldedDeNovo_contig_3412	164616	BAR DOMAIN
ENSGALT00000005512	NorthernBobwhite_ScaffoldedDeNovo_contig_7399	44672	BARD1
ENSGALT00000046057	NorthernBobwhite_ScaffoldedDeNovo_contig_7399	44631	BARD1
ENSGALT00000008240	NorthernBobwhite_ScaffoldedDeNovo_contig_14158	19165	BARX1
ENSGALT00000001814	NorthernBobwhite_ScaffoldedDeNovo_contig_1004	18346	BARX2B
ENSGALT00000021124	NorthernBobwhite_ScaffoldedDeNovo_contig_151	35871	BASP1
ENSGALT00000016804	NorthernBobwhite_ScaffoldedDeNovo_contig_15428	25741	BATF
ENSGALT00000031932	NorthernBobwhite_ScaffoldedDeNovo_contig_6986	7988	BATF3
ENSGALT00000043916	NorthernBobwhite_ScaffoldedDeNovo_contig_24208	14802	BAX INHIBITOR 1-RELATED
ENSGALT00000016289	NorthernBobwhite_ScaffoldedDeNovo_contig_486	25860	BAZ1A
ENSGALT00000001197	NorthernBobwhite_ScaffoldedDeNovo_contig_25979	26443	BAZ1B
ENSGALT00000045011	NorthernBobwhite_ScaffoldedDeNovo_contig_62051	16479	BAZ2A
ENSGALT00000021712	NorthernBobwhite_ScaffoldedDeNovo_contig_16857	3978	BBOX1
ENSGALT00000019318	NorthernBobwhite_ScaffoldedDeNovo_contig_10327	79486	BBS12
ENSGALT00000002774	NorthernBobwhite_ScaffoldedDeNovo_contig_6256	9177	BBS4
ENSGALT00000016007	NorthernBobwhite_ScaffoldedDeNovo_contig_336	47534	BBS5
ENSGALT00000000172	NorthernBobwhite_ScaffoldedDeNovo_contig_20104	5962	B-BTN2
ENSGALT00000024777	NorthernBobwhite_ScaffoldedDeNovo_contig_15956	40676	BBX
ENSGALT00000021615	NorthernBobwhite_ScaffoldedDeNovo_contig_24362	2187	BCAN
ENSGALT00000045996	NorthernBobwhite_ScaffoldedDeNovo_contig_186822	202	BCAP31
ENSGALT00000009337	NorthernBobwhite_ScaffoldedDeNovo_contig_1015	4688	BCAR3
ENSGALT00000012644	NorthernBobwhite_ScaffoldedDeNovo_contig_2146	1188	BCAS1
ENSGALT00000003118	NorthernBobwhite_ScaffoldedDeNovo_contig_7972	17	BCAS2
ENSGALT00000021521	NorthernBobwhite_ScaffoldedDeNovo_contig_3821	3657	BCAT1
ENSGALT00000010681	NorthernBobwhite_ScaffoldedDeNovo_contig_12977	46703	BCCIP
ENSGALT00000042975	NorthernBobwhite_ScaffoldedDeNovo_contig_139	71768	BCDIN3D
ENSGALT00000012775	NorthernBobwhite_ScaffoldedDeNovo_contig_17228	83068	BCDO2
ENSGALT00000043097	NorthernBobwhite_ScaffoldedDeNovo_contig_17228	75159	BCDO2
ENSGALT00000018138	NorthernBobwhite_ScaffoldedDeNovo_contig_3129	27780	B-CELL LYMPHOMA/LEUKEMIA 11B-LIKE
ENSGALT00000015430	NorthernBobwhite_ScaffoldedDeNovo_contig_16314	28421	BCHE
ENSGALT00000044990	NorthernBobwhite_ScaffoldedDeNovo_contig_16314	11117	BCHE
ENSGALT00000044967	NorthernBobwhite_ScaffoldedDeNovo_contig_1478	47	BCL10
ENSGALT00000012765	NorthernBobwhite_ScaffoldedDeNovo_contig_670	2532	BCL11A
ENSGALT00000021014	NorthernBobwhite_ScaffoldedDeNovo_contig_1900	20357	BCL2
ENSGALT00000010523	NorthernBobwhite_ScaffoldedDeNovo_contig_23971	23124	BCL2A1
ENSGALT00000010026	NorthernBobwhite_ScaffoldedDeNovo_contig_33	12747	BCL2L1
ENSGALT00000010073	NorthernBobwhite_ScaffoldedDeNovo_contig_33	12747	BCL2L1
ENSGALT00000021282	NorthernBobwhite_ScaffoldedDeNovo_contig_29205	21282	BCL2L13
ENSGALT00000018829	NorthernBobwhite_ScaffoldedDeNovo_contig_23209	19706	BCL2L14
ENSGALT00000035109	NorthernBobwhite_ScaffoldedDeNovo_contig_16564	15550	BCL2L15
ENSGALT00000011898	NorthernBobwhite_ScaffoldedDeNovo_contig_47399	4738	BCL6
ENSGALT00000006984	NorthernBobwhite_ScaffoldedDeNovo_contig_12710	45109	BCL7
ENSGALT00000044536	NorthernBobwhite_ScaffoldedDeNovo_contig_10771	17603	BCL7B
ENSGALT00000012457	NorthernBobwhite_ScaffoldedDeNovo_contig_3116	6665	BCL9L
ENSGALT00000022585	NorthernBobwhite_ScaffoldedDeNovo_contig_23978	1644	BCLAF1
ENSGALT00000036653	NorthernBobwhite_ScaffoldedDeNovo_contig_8487	134382	BCOR
ENSGALT00000006334	NorthernBobwhite_ScaffoldedDeNovo_contig_1593	1128	BCORL1
ENSGALT00000010819	NorthernBobwhite_ScaffoldedDeNovo_contig_16817	2541	BCR
ENSGALT00000018571	NorthernBobwhite_ScaffoldedDeNovo_contig_4707	34877	BCS1L
ENSGALT00000011255	NorthernBobwhite_ScaffoldedDeNovo_contig_2244	157591	BDH1
ENSGALT00000032517	NorthernBobwhite_ScaffoldedDeNovo_contig_9195	3358	BDKRB1
ENSGALT00000018052	NorthernBobwhite_ScaffoldedDeNovo_contig_26715	26155	BDKRB2
ENSGALT00000019864	NorthernBobwhite_ScaffoldedDeNovo_contig_308	15449	BDNF
ENSGALT00000003846	NorthernBobwhite_ScaffoldedDeNovo_contig_1237	215696	BDP1
ENSGALT00000045869	NorthernBobwhite_ScaffoldedDeNovo_contig_1237	215696	BDP1
ENSGALT00000008452	NorthernBobwhite_ScaffoldedDeNovo_contig_19146	24039	BEAN1
ENSGALT00000026692	NorthernBobwhite_ScaffoldedDeNovo_contig_4455	4465	BEND2
ENSGALT00000024718	NorthernBobwhite_ScaffoldedDeNovo_contig_6336	54212	BEND3
ENSGALT00000023033	NorthernBobwhite_ScaffoldedDeNovo_contig_30556	28813	BEND4
ENSGALT00000017109	NorthernBobwhite_ScaffoldedDeNovo_contig_19387	9240	BEND5
ENSGALT00000026253	NorthernBobwhite_ScaffoldedDeNovo_contig_17354	1677	BEND6
ENSGALT00000010805	NorthernBobwhite_ScaffoldedDeNovo_contig_32160	2954	BEND7
ENSGALT00000032252	NorthernBobwhite_ScaffoldedDeNovo_contig_21300	1435	BERT
ENSGALT00000011683	NorthernBobwhite_ScaffoldedDeNovo_contig_12722	2230	BEST1
ENSGALT00000016468	NorthernBobwhite_ScaffoldedDeNovo_contig_12325	12105	BEST4
ENSGALT00000041398	NorthernBobwhite_ScaffoldedDeNovo_contig_13977	41563	BET1
ENSGALT00000000234	NorthernBobwhite_ScaffoldedDeNovo_contig_19682	8403	BF1
ENSGALT00000042630	NorthernBobwhite_ScaffoldedDeNovo_contig_19682	8403	BF1
ENSGALT00000044235	NorthernBobwhite_ScaffoldedDeNovo_contig_122005	235	BF1
ENSGALT00000046187	NorthernBobwhite_ScaffoldedDeNovo_contig_19682	8415	BF1
ENSGALT00000004911	NorthernBobwhite_ScaffoldedDeNovo_contig_51973	588	BFAR
ENSGALT00000032154	NorthernBobwhite_ScaffoldedDeNovo_contig_17752	20508	BFGF
ENSGALT00000032155	NorthernBobwhite_ScaffoldedDeNovo_contig_17752	1552	BFGF
ENSGALT00000000139	NorthernBobwhite_ScaffoldedDeNovo_contig_19682	8415	BFIV21
ENSGALT00000043207	NorthernBobwhite_ScaffoldedDeNovo_contig_19682	8219	BFIV21
ENSGALT00000044107	NorthernBobwhite_ScaffoldedDeNovo_contig_122005	235	BFIV21
ENSGALT00000046170	NorthernBobwhite_ScaffoldedDeNovo_contig_19682	8062	BFIV21
ENSGALT00000039401	NorthernBobwhite_ScaffoldedDeNovo_contig_1468	3386	BFSP1
ENSGALT00000001628	NorthernBobwhite_ScaffoldedDeNovo_contig_30687	1	B-G
ENSGALT00000045385	NorthernBobwhite_ScaffoldedDeNovo_contig_30687	1	BG1
ENSGALT00000031518	NorthernBobwhite_ScaffoldedDeNovo_contig_30687	1	BG2
ENSGALT00000042868	NorthernBobwhite_ScaffoldedDeNovo_contig_30687	1	BG2
ENSGALT00000045173	NorthernBobwhite_ScaffoldedDeNovo_contig_30687	17	BG2
ENSGALT00000000081	NorthernBobwhite_ScaffoldedDeNovo_contig_30687	1	B-G-201
ENSGALT00000043371	NorthernBobwhite_ScaffoldedDeNovo_contig_30687	16	B-G-201
ENSGALT00000044933	NorthernBobwhite_ScaffoldedDeNovo_contig_30687	16	B-G-201
ENSGALT00000044968	NorthernBobwhite_ScaffoldedDeNovo_contig_30687	1	B-G-202
ENSGALT00000043739	NorthernBobwhite_ScaffoldedDeNovo_contig_30687	16	B-G-202
ENSGALT00000009175	NorthernBobwhite_ScaffoldedDeNovo_contig_127902	193	BHLHE23
ENSGALT00000013524	NorthernBobwhite_ScaffoldedDeNovo_contig_3306	39881	BHLHE40
ENSGALT00000045848	NorthernBobwhite_ScaffoldedDeNovo_contig_7761	1	BICC1
ENSGALT00000021097	NorthernBobwhite_ScaffoldedDeNovo_contig_3549	13560	BICD1
ENSGALT00000008433	NorthernBobwhite_ScaffoldedDeNovo_contig_19234	195	BICD2
ENSGALT00000021284	NorthernBobwhite_ScaffoldedDeNovo_contig_29205	13986	BID
ENSGALT00000022909	NorthernBobwhite_ScaffoldedDeNovo_contig_18955	4918	BIK
ENSGALT00000018820	NorthernBobwhite_ScaffoldedDeNovo_contig_9818	8218	BIN1
ENSGALT00000045357	NorthernBobwhite_ScaffoldedDeNovo_contig_53365	1065	BIN2
ENSGALT00000039118	NorthernBobwhite_ScaffoldedDeNovo_contig_15019	231	BIRC5
ENSGALT00000039119	NorthernBobwhite_ScaffoldedDeNovo_contig_15019	42	BIRC5
ENSGALT00000009253	NorthernBobwhite_ScaffoldedDeNovo_contig_3011	28584	BIRC7
ENSGALT00000005067	NorthernBobwhite_ScaffoldedDeNovo_contig_21431	9523	BKJ
ENSGALT00000008925	NorthernBobwhite_ScaffoldedDeNovo_contig_30687	5402	BLB1
ENSGALT00000000194	NorthernBobwhite_ScaffoldedDeNovo_contig_30687	5389	BLB3
ENSGALT00000045586	NorthernBobwhite_ScaffoldedDeNovo_contig_1790	10965	BLCAP
ENSGALT00000000183	NorthernBobwhite_ScaffoldedDeNovo_contig_30687	3384	BLEC1
ENSGALT00000024824	NorthernBobwhite_ScaffoldedDeNovo_contig_1156	16	BLIMP-1
ENSGALT00000006773	NorthernBobwhite_ScaffoldedDeNovo_contig_13386	11242	BLMH
ENSGALT00000011296	NorthernBobwhite_ScaffoldedDeNovo_contig_2353	14431	BLNK
ENSGALT00000039674	NorthernBobwhite_ScaffoldedDeNovo_contig_249	43239	BLNK
ENSGALT00000040091	NorthernBobwhite_ScaffoldedDeNovo_contig_7116	4152	BLOC1S2
ENSGALT00000022115	NorthernBobwhite_ScaffoldedDeNovo_contig_8221	10511	BLOC1S4
ENSGALT00000020852	NorthernBobwhite_ScaffoldedDeNovo_contig_7973	1199	BLOC1S5
ENSGALT00000020178	NorthernBobwhite_ScaffoldedDeNovo_contig_1714	46785	BLVRA
ENSGALT00000024570	NorthernBobwhite_ScaffoldedDeNovo_contig_19098	2338	BLZF1
ENSGALT00000023454	NorthernBobwhite_ScaffoldedDeNovo_contig_3338	101117	BMF
ENSGALT00000046117	NorthernBobwhite_ScaffoldedDeNovo_contig_3338	101117	BMF
ENSGALT00000044993	NorthernBobwhite_ScaffoldedDeNovo_contig_6522	5149	BMI1
ENSGALT00000000169	NorthernBobwhite_ScaffoldedDeNovo_contig_17838	5742	BMP-10
ENSGALT00000007559	NorthernBobwhite_ScaffoldedDeNovo_contig_26991	1	BMP15
ENSGALT00000014350	NorthernBobwhite_ScaffoldedDeNovo_contig_12571	7354	BMP2
ENSGALT00000017693	NorthernBobwhite_ScaffoldedDeNovo_contig_996	123396	BMP2K
ENSGALT00000017722	NorthernBobwhite_ScaffoldedDeNovo_contig_6089	2803	BMP3
ENSGALT00000020316	NorthernBobwhite_ScaffoldedDeNovo_contig_14667	52446	BMP4
ENSGALT00000020862	NorthernBobwhite_ScaffoldedDeNovo_contig_5326	37756	BMP6
ENSGALT00000040607	NorthernBobwhite_ScaffoldedDeNovo_contig_35083	21145	BMP8B
ENSGALT00000019894	NorthernBobwhite_ScaffoldedDeNovo_contig_20900	3214	BMPER
ENSGALT00000003119	NorthernBobwhite_ScaffoldedDeNovo_contig_26269	6632	BMPR1A
ENSGALT00000019952	NorthernBobwhite_ScaffoldedDeNovo_contig_21312	7727	BMPR1B
ENSGALT00000037656	NorthernBobwhite_ScaffoldedDeNovo_contig_21312	7344	BMPR1B
ENSGALT00000013786	NorthernBobwhite_ScaffoldedDeNovo_contig_5379	19918	BMPR-II
ENSGALT00000004133	NorthernBobwhite_ScaffoldedDeNovo_contig_16534	34879	BMS1
ENSGALT00000026717	NorthernBobwhite_ScaffoldedDeNovo_contig_15886	16551	BMX
ENSGALT00000009730	NorthernBobwhite_ScaffoldedDeNovo_contig_2300	42607	BNC1
ENSGALT00000024363	NorthernBobwhite_ScaffoldedDeNovo_contig_975	98212	BNC2
ENSGALT00000044971	NorthernBobwhite_ScaffoldedDeNovo_contig_4389	27218	BNF2
ENSGALT00000004545	NorthernBobwhite_ScaffoldedDeNovo_contig_13497	328	BNIP1
ENSGALT00000006011	NorthernBobwhite_ScaffoldedDeNovo_contig_142699	182	BNIP2
ENSGALT00000017059	NorthernBobwhite_ScaffoldedDeNovo_contig_23048	952	BNIP3
ENSGALT00000009271	NorthernBobwhite_ScaffoldedDeNovo_contig_13014	7151	BOK
ENSGALT00000045530	NorthernBobwhite_ScaffoldedDeNovo_contig_12175	18	BOP1
ENSGALT00000021340	NorthernBobwhite_ScaffoldedDeNovo_contig_19837	10815	BPGM
ENSGALT00000020918	NorthernBobwhite_ScaffoldedDeNovo_contig_28002	3696	BPHL
ENSGALT00000033713	NorthernBobwhite_ScaffoldedDeNovo_contig_2528	452	BPIFB3
ENSGALT00000033711	NorthernBobwhite_ScaffoldedDeNovo_contig_2528	5883	BPIFB4
ENSGALT00000010794	NorthernBobwhite_ScaffoldedDeNovo_contig_3620	73578	BPIFB6
ENSGALT00000010777	NorthernBobwhite_ScaffoldedDeNovo_contig_3620	66252	BPIFB8
ENSGALT00000020578	NorthernBobwhite_ScaffoldedDeNovo_contig_1630	29461	BPIFC
ENSGALT00000038566	NorthernBobwhite_ScaffoldedDeNovo_contig_44817	498	BPNT1
ENSGALT00000020980	NorthernBobwhite_ScaffoldedDeNovo_contig_38865	14155	BRAF
ENSGALT00000007407	NorthernBobwhite_ScaffoldedDeNovo_contig_3900	108989	BRAP
ENSGALT00000004392	NorthernBobwhite_ScaffoldedDeNovo_contig_490	30124	BRCA1
ENSGALT00000008648	NorthernBobwhite_ScaffoldedDeNovo_contig_2101	7470	BRCC3
ENSGALT00000013896	NorthernBobwhite_ScaffoldedDeNovo_contig_6504	69843	BRD1
ENSGALT00000000212	NorthernBobwhite_ScaffoldedDeNovo_contig_21767	205	BRD2
ENSGALT00000004226	NorthernBobwhite_ScaffoldedDeNovo_contig_12716	2889	BRD3
ENSGALT00000044801	NorthernBobwhite_ScaffoldedDeNovo_contig_51534	1	BRD4
ENSGALT00000006006	NorthernBobwhite_ScaffoldedDeNovo_contig_46772	44	BRD7
ENSGALT00000005039	NorthernBobwhite_ScaffoldedDeNovo_contig_10214	2815	BRD8
ENSGALT00000020442	NorthernBobwhite_ScaffoldedDeNovo_contig_9686	27621	BRD9
ENSGALT00000016306	NorthernBobwhite_ScaffoldedDeNovo_contig_5332	71127	BRE
ENSGALT00000029525	NorthernBobwhite_ScaffoldedDeNovo_contig_4389	27229	BRF2
ENSGALT00000004598	NorthernBobwhite_ScaffoldedDeNovo_contig_17778	31316	BRI3BP
ENSGALT00000039225	NorthernBobwhite_ScaffoldedDeNovo_contig_1662	82027	BRIP1
ENSGALT00000016417	NorthernBobwhite_ScaffoldedDeNovo_contig_169051	683	BRMS1L
ENSGALT00000045448	NorthernBobwhite_ScaffoldedDeNovo_contig_7747	17584	BRN3
ENSGALT00000015332	NorthernBobwhite_ScaffoldedDeNovo_contig_7669	8195	BROX
ENSGALT00000024900	NorthernBobwhite_ScaffoldedDeNovo_contig_8120	39321	BRP44
ENSGALT00000010726	NorthernBobwhite_ScaffoldedDeNovo_contig_18263	26728	BRPF1
ENSGALT00000001123	NorthernBobwhite_ScaffoldedDeNovo_contig_13461	15737	BRPF3
ENSGALT00000010343	NorthernBobwhite_ScaffoldedDeNovo_contig_252	5587	BRS3
ENSGALT00000010803	NorthernBobwhite_ScaffoldedDeNovo_contig_4129	44141	BRSK2
ENSGALT00000043974	NorthernBobwhite_ScaffoldedDeNovo_contig_1876	68	BRSK2
ENSGALT00000043390	NorthernBobwhite_ScaffoldedDeNovo_contig_12478	34826	BRT-1
ENSGALT00000045378	NorthernBobwhite_ScaffoldedDeNovo_contig_12478	37961	BRT-1
ENSGALT00000025882	NorthernBobwhite_ScaffoldedDeNovo_contig_9180	4530	BRWD1
ENSGALT00000011586	NorthernBobwhite_ScaffoldedDeNovo_contig_137	110246	BRWD3
ENSGALT00000005386	NorthernBobwhite_ScaffoldedDeNovo_contig_19052	43548	BSDC1
ENSGALT00000002022	NorthernBobwhite_ScaffoldedDeNovo_contig_1052	3229	BSG
ENSGALT00000043491	NorthernBobwhite_ScaffoldedDeNovo_contig_27279	14522	BSND
ENSGALT00000014393	NorthernBobwhite_ScaffoldedDeNovo_contig_35903	3751	BSPRY
ENSGALT00000023420	NorthernBobwhite_ScaffoldedDeNovo_contig_14325	4365	BST1
ENSGALT00000043970	NorthernBobwhite_ScaffoldedDeNovo_contig_14325	4287	BST1
ENSGALT00000011235	NorthernBobwhite_ScaffoldedDeNovo_contig_1196	24	BTAF1
ENSGALT00000008620	NorthernBobwhite_ScaffoldedDeNovo_contig_11503	43219	BTBD10
ENSGALT00000045689	NorthernBobwhite_ScaffoldedDeNovo_contig_11503	42210	BTBD10
ENSGALT00000020623	NorthernBobwhite_ScaffoldedDeNovo_contig_11391	2542	BTBD11
ENSGALT00000002652	NorthernBobwhite_ScaffoldedDeNovo_contig_48318	1686	BTBD14A
ENSGALT00000038481	NorthernBobwhite_ScaffoldedDeNovo_contig_8851	21604	BTBD17
ENSGALT00000043819	NorthernBobwhite_ScaffoldedDeNovo_contig_13396	1907	BTBD19
ENSGALT00000001502	NorthernBobwhite_ScaffoldedDeNovo_contig_13285	3125	BTBD2
ENSGALT00000014689	NorthernBobwhite_ScaffoldedDeNovo_contig_767	184533	BTBD3
ENSGALT00000019138	NorthernBobwhite_ScaffoldedDeNovo_contig_11346	81766	BTBD6
ENSGALT00000016477	NorthernBobwhite_ScaffoldedDeNovo_contig_58325	2916	BTBD9
ENSGALT00000038190	NorthernBobwhite_ScaffoldedDeNovo_contig_58325	2916	BTBD9
ENSGALT00000045574	NorthernBobwhite_ScaffoldedDeNovo_contig_2111	57987	BTC
ENSGALT00000018291	NorthernBobwhite_ScaffoldedDeNovo_contig_23386	3926	BTD
ENSGALT00000000540	NorthernBobwhite_ScaffoldedDeNovo_contig_15848	31591	BTF3
ENSGALT00000029777	NorthernBobwhite_ScaffoldedDeNovo_contig_15848	28091	BTF3
ENSGALT00000017200	NorthernBobwhite_ScaffoldedDeNovo_contig_10102	15110	BTF3L4
ENSGALT00000044067	NorthernBobwhite_ScaffoldedDeNovo_contig_10102	16969	BTF3L4
ENSGALT00000018400	NorthernBobwhite_ScaffoldedDeNovo_contig_15262	37246	BTG1
ENSGALT00000042662	NorthernBobwhite_ScaffoldedDeNovo_contig_898	152319	BTG2
ENSGALT00000012322	NorthernBobwhite_ScaffoldedDeNovo_contig_3116	63236	BTG4
ENSGALT00000030419	NorthernBobwhite_ScaffoldedDeNovo_contig_29798	441	BTLA
ENSGALT00000000824	NorthernBobwhite_ScaffoldedDeNovo_contig_60123	3294	BTN1A1
ENSGALT00000033197	NorthernBobwhite_ScaffoldedDeNovo_contig_16633	388	BTRC
ENSGALT00000011417	NorthernBobwhite_ScaffoldedDeNovo_contig_166	82677	BUD13
ENSGALT00000007493	NorthernBobwhite_ScaffoldedDeNovo_contig_17209	13852	BUD31
ENSGALT00000005332	NorthernBobwhite_ScaffoldedDeNovo_contig_12345	48375	BXDC2
ENSGALT00000005492	NorthernBobwhite_ScaffoldedDeNovo_contig_27929	49872	BYSL
ENSGALT00000033478	NorthernBobwhite_ScaffoldedDeNovo_contig_36396	3562	BZW1
ENSGALT00000017574	NorthernBobwhite_ScaffoldedDeNovo_contig_24192	18239	BZW2
ENSGALT00000004758	NorthernBobwhite_ScaffoldedDeNovo_contig_10556	5284	C10ORF107
ENSGALT00000040497	NorthernBobwhite_ScaffoldedDeNovo_contig_8902	38453	C10ORF11
ENSGALT00000012931	NorthernBobwhite_ScaffoldedDeNovo_contig_3473	12455	C10ORF112
ENSGALT00000013845	NorthernBobwhite_ScaffoldedDeNovo_contig_26887	2244	C10ORF112
ENSGALT00000014566	NorthernBobwhite_ScaffoldedDeNovo_contig_12578	13625	C10ORF118
ENSGALT00000045516	NorthernBobwhite_ScaffoldedDeNovo_contig_1887	41866	C10ORF12
ENSGALT00000013188	NorthernBobwhite_ScaffoldedDeNovo_contig_17127	36191	C10ORF32
ENSGALT00000010831	NorthernBobwhite_ScaffoldedDeNovo_contig_9387	15674	C10ORF47
ENSGALT00000012748	NorthernBobwhite_ScaffoldedDeNovo_contig_40296	9490	C10ORF67
ENSGALT00000045209	NorthernBobwhite_ScaffoldedDeNovo_contig_10717	53815	C10ORF71
ENSGALT00000000012	NorthernBobwhite_ScaffoldedDeNovo_contig_58199	643	C10ORF88
ENSGALT00000001320	NorthernBobwhite_ScaffoldedDeNovo_contig_11593	12539	C11H16ORF80
ENSGALT00000012912	NorthernBobwhite_ScaffoldedDeNovo_contig_19845	10514	C11ORF1
ENSGALT00000009513	NorthernBobwhite_ScaffoldedDeNovo_contig_5928	4307	C11ORF16
ENSGALT00000032685	NorthernBobwhite_ScaffoldedDeNovo_contig_4136	54386	C11ORF24
ENSGALT00000001212	NorthernBobwhite_ScaffoldedDeNovo_contig_1875	3099	C11ORF30
ENSGALT00000019616	NorthernBobwhite_ScaffoldedDeNovo_contig_1720	76613	C11ORF41
ENSGALT00000013436	NorthernBobwhite_ScaffoldedDeNovo_contig_20369	3479	C11ORF49
ENSGALT00000027832	NorthernBobwhite_ScaffoldedDeNovo_contig_93942	722	C11ORF54
ENSGALT00000012801	NorthernBobwhite_ScaffoldedDeNovo_contig_17228	52100	C11ORF57
ENSGALT00000034621	NorthernBobwhite_ScaffoldedDeNovo_contig_6075	1	C11ORF61
ENSGALT00000027775	NorthernBobwhite_ScaffoldedDeNovo_contig_99191	2	C11ORF70
ENSGALT00000012899	NorthernBobwhite_ScaffoldedDeNovo_contig_1360	45451	C11ORF74
ENSGALT00000045679	NorthernBobwhite_ScaffoldedDeNovo_contig_4161	14042	C11ORF75
ENSGALT00000000097	NorthernBobwhite_ScaffoldedDeNovo_contig_8588	20056	C11ORF82
ENSGALT00000027707	NorthernBobwhite_ScaffoldedDeNovo_contig_33567	15295	C11ORF87
ENSGALT00000041343	NorthernBobwhite_ScaffoldedDeNovo_contig_3116	57575	C11ORF88
ENSGALT00000039194	NorthernBobwhite_ScaffoldedDeNovo_contig_577	48310	C11ORF89
ENSGALT00000044873	NorthernBobwhite_ScaffoldedDeNovo_contig_3134	26658	C11ORF93
ENSGALT00000009490	NorthernBobwhite_ScaffoldedDeNovo_contig_6732	946	C12H3ORF37
ENSGALT00000018208	NorthernBobwhite_ScaffoldedDeNovo_contig_2494	10896	C12ORF29
ENSGALT00000021891	NorthernBobwhite_ScaffoldedDeNovo_contig_26491	3411	C12ORF32
ENSGALT00000021101	NorthernBobwhite_ScaffoldedDeNovo_contig_31350	5758	C12ORF35
ENSGALT00000021682	NorthernBobwhite_ScaffoldedDeNovo_contig_6568	27884	C12ORF39
ENSGALT00000044724	NorthernBobwhite_ScaffoldedDeNovo_contig_14741	107104	C12ORF40
ENSGALT00000011283	NorthernBobwhite_ScaffoldedDeNovo_contig_25777	1024	C12ORF43
ENSGALT00000020722	NorthernBobwhite_ScaffoldedDeNovo_contig_10515	37351	C12ORF45
ENSGALT00000043040	NorthernBobwhite_ScaffoldedDeNovo_contig_15632	113445	C12ORF5
ENSGALT00000023359	NorthernBobwhite_ScaffoldedDeNovo_contig_12553	20248	C12ORF53
ENSGALT00000023478	NorthernBobwhite_ScaffoldedDeNovo_contig_93536	316	C12ORF57
ENSGALT00000045276	NorthernBobwhite_ScaffoldedDeNovo_contig_10748	1466	C12ORF66
ENSGALT00000019176	NorthernBobwhite_ScaffoldedDeNovo_contig_2911	15868	C12ORF69
ENSGALT00000044277	NorthernBobwhite_ScaffoldedDeNovo_contig_21350	5546	C12ORF73
ENSGALT00000010517	NorthernBobwhite_ScaffoldedDeNovo_contig_36440	2763	C13H5ORF15
ENSGALT00000004538	NorthernBobwhite_ScaffoldedDeNovo_contig_8931	5976	C13H5ORF41
ENSGALT00000043177	NorthernBobwhite_ScaffoldedDeNovo_contig_8931	4188	C13H5ORF41
ENSGALT00000027242	NorthernBobwhite_ScaffoldedDeNovo_contig_11095	27084	C13ORF27
ENSGALT00000010556	NorthernBobwhite_ScaffoldedDeNovo_contig_3456	66439	C14H16ORF63
ENSGALT00000045897	NorthernBobwhite_ScaffoldedDeNovo_contig_15428	73802	C14ORF1
ENSGALT00000017369	NorthernBobwhite_ScaffoldedDeNovo_contig_25784	6685	C14ORF102
ENSGALT00000019758	NorthernBobwhite_ScaffoldedDeNovo_contig_13805	44194	C14ORF105
ENSGALT00000016850	NorthernBobwhite_ScaffoldedDeNovo_contig_8950	29860	C14ORF118
ENSGALT00000032587	NorthernBobwhite_ScaffoldedDeNovo_contig_31529	4426	C14ORF126
ENSGALT00000017623	NorthernBobwhite_ScaffoldedDeNovo_contig_11156	8212	C14ORF130
ENSGALT00000019451	NorthernBobwhite_ScaffoldedDeNovo_contig_5627	18487	C14ORF135
ENSGALT00000019600	NorthernBobwhite_ScaffoldedDeNovo_contig_13023	81082	C14ORF149
ENSGALT00000017411	NorthernBobwhite_ScaffoldedDeNovo_contig_8348	10203	C14ORF159
ENSGALT00000019746	NorthernBobwhite_ScaffoldedDeNovo_contig_7410	14945	C14ORF37
ENSGALT00000044583	NorthernBobwhite_ScaffoldedDeNovo_contig_5856	59107	C14ORF38
ENSGALT00000032471	NorthernBobwhite_ScaffoldedDeNovo_contig_86340	489	C14ORF39
ENSGALT00000019112	NorthernBobwhite_ScaffoldedDeNovo_contig_36596	34756	C14ORF79
ENSGALT00000045846	NorthernBobwhite_ScaffoldedDeNovo_contig_2230	32702	C14ORF80
ENSGALT00000013379	NorthernBobwhite_ScaffoldedDeNovo_contig_9015	21811	C15H12ORF49
ENSGALT00000003199	NorthernBobwhite_ScaffoldedDeNovo_contig_18968	39713	C15H22ORF25
ENSGALT00000046094	NorthernBobwhite_ScaffoldedDeNovo_contig_17005	2648	C15ORF39
ENSGALT00000044915	NorthernBobwhite_ScaffoldedDeNovo_contig_17600	2364	C15ORF40
ENSGALT00000043018	NorthernBobwhite_ScaffoldedDeNovo_contig_95215	422	C15ORF43
ENSGALT00000045537	NorthernBobwhite_ScaffoldedDeNovo_contig_95215	422	C15ORF43
ENSGALT00000007402	NorthernBobwhite_ScaffoldedDeNovo_contig_19333	13552	C15ORF57
ENSGALT00000042782	NorthernBobwhite_ScaffoldedDeNovo_contig_19333	11582	C15ORF57
ENSGALT00000002633	NorthernBobwhite_ScaffoldedDeNovo_contig_300	31074	C15ORF59
ENSGALT00000002677	NorthernBobwhite_ScaffoldedDeNovo_contig_3762	30513	C15ORF60
ENSGALT00000007097	NorthernBobwhite_ScaffoldedDeNovo_contig_11646	11813	C15ORF62
ENSGALT00000003102	NorthernBobwhite_ScaffoldedDeNovo_contig_25292	42380	C16ORF11
ENSGALT00000010426	NorthernBobwhite_ScaffoldedDeNovo_contig_14612	26469	C16ORF45
ENSGALT00000012346	NorthernBobwhite_ScaffoldedDeNovo_contig_1956	4816	C16ORF5
ENSGALT00000011230	NorthernBobwhite_ScaffoldedDeNovo_contig_5233	24784	C16ORF52
ENSGALT00000001326	NorthernBobwhite_ScaffoldedDeNovo_contig_11593	354	C16ORF57
ENSGALT00000044152	NorthernBobwhite_ScaffoldedDeNovo_contig_11593	354	C16ORF57
ENSGALT00000014987	NorthernBobwhite_ScaffoldedDeNovo_contig_38288	2520	C16ORF59
ENSGALT00000039834	NorthernBobwhite_ScaffoldedDeNovo_contig_31703	20104	C16ORF72
ENSGALT00000033814	NorthernBobwhite_ScaffoldedDeNovo_contig_14983	3049	C16ORF73
ENSGALT00000009456	NorthernBobwhite_ScaffoldedDeNovo_contig_1426	35789	C16ORF79
ENSGALT00000028047	NorthernBobwhite_ScaffoldedDeNovo_contig_7202	3139	C16ORF87
ENSGALT00000029798	NorthernBobwhite_ScaffoldedDeNovo_contig_8192	7079	C16ORF88
ENSGALT00000003226	NorthernBobwhite_ScaffoldedDeNovo_contig_30637	485	C16ORF89
ENSGALT00000034164	NorthernBobwhite_ScaffoldedDeNovo_contig_6483	9094	C16ORF93
ENSGALT00000001523	NorthernBobwhite_ScaffoldedDeNovo_contig_2717	92332	C17ORF104
ENSGALT00000003817	NorthernBobwhite_ScaffoldedDeNovo_contig_23199	43099	C17ORF109
ENSGALT00000039767	NorthernBobwhite_ScaffoldedDeNovo_contig_456	85039	C17ORF32
ENSGALT00000007886	NorthernBobwhite_ScaffoldedDeNovo_contig_16096	4958	C17ORF39
ENSGALT00000034629	NorthernBobwhite_ScaffoldedDeNovo_contig_17561	1470	C17ORF58
ENSGALT00000045345	NorthernBobwhite_ScaffoldedDeNovo_contig_30278	7878	C17ORF59
ENSGALT00000034655	NorthernBobwhite_ScaffoldedDeNovo_contig_1061	31227	C17ORF60
ENSGALT00000035364	NorthernBobwhite_ScaffoldedDeNovo_contig_60646	4	C17ORF64
ENSGALT00000041341	NorthernBobwhite_ScaffoldedDeNovo_contig_3305	11691	C17ORF67
ENSGALT00000008166	NorthernBobwhite_ScaffoldedDeNovo_contig_10624	6022	C17ORF71
ENSGALT00000005437	NorthernBobwhite_ScaffoldedDeNovo_contig_7010	68673	C17ORF75
ENSGALT00000008741	NorthernBobwhite_ScaffoldedDeNovo_contig_3831	1293	C17ORF78
ENSGALT00000002445	NorthernBobwhite_ScaffoldedDeNovo_contig_8742	7488	C18H17ORF62
ENSGALT00000044981	NorthernBobwhite_ScaffoldedDeNovo_contig_27424	168	C18H17ORF70
ENSGALT00000021435	NorthernBobwhite_ScaffoldedDeNovo_contig_16632	14539	C18ORF21
ENSGALT00000029361	NorthernBobwhite_ScaffoldedDeNovo_contig_4584	1095	C18ORF32
ENSGALT00000045066	NorthernBobwhite_ScaffoldedDeNovo_contig_8948	21619	C18ORF63
ENSGALT00000024206	NorthernBobwhite_ScaffoldedDeNovo_contig_27467	32409	C18ORF8
ENSGALT00000004180	NorthernBobwhite_ScaffoldedDeNovo_contig_14776	86467	C19H17ORF85
ENSGALT00000007136	NorthernBobwhite_ScaffoldedDeNovo_contig_23245	1	C19ORF12
ENSGALT00000002936	NorthernBobwhite_ScaffoldedDeNovo_contig_4501	937	C19ORF21
ENSGALT00000043823	NorthernBobwhite_ScaffoldedDeNovo_contig_4501	937	C19ORF21
ENSGALT00000045762	NorthernBobwhite_ScaffoldedDeNovo_contig_10180	13064	C19ORF25
ENSGALT00000041218	NorthernBobwhite_ScaffoldedDeNovo_contig_3366	63260	C19ORF35
ENSGALT00000003154	NorthernBobwhite_ScaffoldedDeNovo_contig_10398	14029	C19ORF6
ENSGALT00000045698	NorthernBobwhite_ScaffoldedDeNovo_contig_75850	754	C19ORF70
ENSGALT00000014258	NorthernBobwhite_ScaffoldedDeNovo_contig_10548	13142	C1D
ENSGALT00000015869	NorthernBobwhite_ScaffoldedDeNovo_contig_48492	1813	C1GALT1
ENSGALT00000013866	NorthernBobwhite_ScaffoldedDeNovo_contig_774	55719	C1GALT1C1
ENSGALT00000044923	NorthernBobwhite_ScaffoldedDeNovo_contig_10744	29096	C1H11ORF67
ENSGALT00000002817	NorthernBobwhite_ScaffoldedDeNovo_contig_19184	1	C1H11ORF73
ENSGALT00000020629	NorthernBobwhite_ScaffoldedDeNovo_contig_14558	24937	C1H12ORF23
ENSGALT00000027944	NorthernBobwhite_ScaffoldedDeNovo_contig_27437	18149	C1H12ORF4
ENSGALT00000037274	NorthernBobwhite_ScaffoldedDeNovo_contig_27437	17155	C1H12ORF4
ENSGALT00000043748	NorthernBobwhite_ScaffoldedDeNovo_contig_7322	5069	C1H12ORF48
ENSGALT00000044875	NorthernBobwhite_ScaffoldedDeNovo_contig_7322	5149	C1H12ORF48
ENSGALT00000027371	NorthernBobwhite_ScaffoldedDeNovo_contig_78822	286	C1H13ORF34
ENSGALT00000030337	NorthernBobwhite_ScaffoldedDeNovo_contig_42509	286	C1H21ORF33
ENSGALT00000025613	NorthernBobwhite_ScaffoldedDeNovo_contig_18764	47303	C1H21ORF59
ENSGALT00000043255	NorthernBobwhite_ScaffoldedDeNovo_contig_32332	16987	C1H21ORF91
ENSGALT00000044529	NorthernBobwhite_ScaffoldedDeNovo_contig_20878	20130	C1H22ORF40
ENSGALT00000027117	NorthernBobwhite_ScaffoldedDeNovo_contig_7512	1752	C1H2ORF49
ENSGALT00000038899	NorthernBobwhite_ScaffoldedDeNovo_contig_33074	752	C1H7ORF60
ENSGALT00000031873	NorthernBobwhite_ScaffoldedDeNovo_contig_5880	13896	C1ORF100
ENSGALT00000017390	NorthernBobwhite_ScaffoldedDeNovo_contig_53424	1857	C1ORF101
ENSGALT00000035394	NorthernBobwhite_ScaffoldedDeNovo_contig_53424	1857	C1ORF101
ENSGALT00000045940	NorthernBobwhite_ScaffoldedDeNovo_contig_211401	2	C1ORF106
ENSGALT00000035095	NorthernBobwhite_ScaffoldedDeNovo_contig_81942	46	C1ORF109
ENSGALT00000024565	NorthernBobwhite_ScaffoldedDeNovo_contig_19098	7690	C1ORF114
ENSGALT00000001635	NorthernBobwhite_ScaffoldedDeNovo_contig_418	600	C1ORF116
ENSGALT00000031841	NorthernBobwhite_ScaffoldedDeNovo_contig_29938	82	C1ORF131
ENSGALT00000038926	NorthernBobwhite_ScaffoldedDeNovo_contig_10480	55064	C1ORF146
ENSGALT00000045321	NorthernBobwhite_ScaffoldedDeNovo_contig_5146	65841	C1ORF159
ENSGALT00000033170	NorthernBobwhite_ScaffoldedDeNovo_contig_5691	2093	C1ORF164
ENSGALT00000045352	NorthernBobwhite_ScaffoldedDeNovo_contig_5691	1923	C1ORF164
ENSGALT00000043146	NorthernBobwhite_ScaffoldedDeNovo_contig_20897	27273	C1ORF170
ENSGALT00000001324	NorthernBobwhite_ScaffoldedDeNovo_contig_24065	21045	C1ORF172
ENSGALT00000001441	NorthernBobwhite_ScaffoldedDeNovo_contig_2442	85273	C1ORF174
ENSGALT00000017549	NorthernBobwhite_ScaffoldedDeNovo_contig_17098	6683	C1ORF177
ENSGALT00000045254	NorthernBobwhite_ScaffoldedDeNovo_contig_25660	55846	C1ORF198
ENSGALT00000033576	NorthernBobwhite_ScaffoldedDeNovo_contig_24323	22888	C1ORF21
ENSGALT00000003713	NorthernBobwhite_ScaffoldedDeNovo_contig_32102	21363	C1ORF216
ENSGALT00000001982	NorthernBobwhite_ScaffoldedDeNovo_contig_11040	23966	C1ORF222
ENSGALT00000033166	NorthernBobwhite_ScaffoldedDeNovo_contig_21608	358	C1ORF228
ENSGALT00000046020	NorthernBobwhite_ScaffoldedDeNovo_contig_22261	9978	C1ORF35
ENSGALT00000001043	NorthernBobwhite_ScaffoldedDeNovo_contig_9515	33451	C1ORF38
ENSGALT00000043845	NorthernBobwhite_ScaffoldedDeNovo_contig_9515	33451	C1ORF38
ENSGALT00000022054	NorthernBobwhite_ScaffoldedDeNovo_contig_181505	126	C1ORF43
ENSGALT00000007659	NorthernBobwhite_ScaffoldedDeNovo_contig_14261	43172	C1ORF50
ENSGALT00000014116	NorthernBobwhite_ScaffoldedDeNovo_contig_40592	12428	C1ORF52
ENSGALT00000003481	NorthernBobwhite_ScaffoldedDeNovo_contig_140890	327	C1ORF53
ENSGALT00000015061	NorthernBobwhite_ScaffoldedDeNovo_contig_6715	4520	C1ORF55
ENSGALT00000017944	NorthernBobwhite_ScaffoldedDeNovo_contig_18274	514	C1ORF57
ENSGALT00000036208	NorthernBobwhite_ScaffoldedDeNovo_contig_53009	4468	C1ORF63
ENSGALT00000031953	NorthernBobwhite_ScaffoldedDeNovo_contig_4944	7511	C1ORF67
ENSGALT00000002100	NorthernBobwhite_ScaffoldedDeNovo_contig_51723	1	C1ORF74
ENSGALT00000045595	NorthernBobwhite_ScaffoldedDeNovo_contig_87785	103	C1ORF85
ENSGALT00000035046	NorthernBobwhite_ScaffoldedDeNovo_contig_10557	2801	C1ORF94
ENSGALT00000015006	NorthernBobwhite_ScaffoldedDeNovo_contig_6304	11375	C1ORF95
ENSGALT00000007608	NorthernBobwhite_ScaffoldedDeNovo_contig_198	27123	C1QA
ENSGALT00000007609	NorthernBobwhite_ScaffoldedDeNovo_contig_198	30305	C1QB
ENSGALT00000002525	NorthernBobwhite_ScaffoldedDeNovo_contig_15589	2677	C1QBP
ENSGALT00000044328	NorthernBobwhite_ScaffoldedDeNovo_contig_23362	63503	C1QL1
ENSGALT00000045818	NorthernBobwhite_ScaffoldedDeNovo_contig_28659	34735	C1QTNF2
ENSGALT00000043835	NorthernBobwhite_ScaffoldedDeNovo_contig_4320	1808	C1QTNF3
ENSGALT00000013115	NorthernBobwhite_ScaffoldedDeNovo_contig_17643	33031	C1QTNF4
ENSGALT00000010920	NorthernBobwhite_ScaffoldedDeNovo_contig_11787	17404	C1QTNF5
ENSGALT00000045767	NorthernBobwhite_ScaffoldedDeNovo_contig_2261	30393	C1QTNF6
ENSGALT00000023428	NorthernBobwhite_ScaffoldedDeNovo_contig_12270	38315	C1QTNF7
ENSGALT00000008437	NorthernBobwhite_ScaffoldedDeNovo_contig_2289	3557	C1QTNF8
ENSGALT00000027653	NorthernBobwhite_ScaffoldedDeNovo_contig_30702	808	C1QTNF9
ENSGALT00000045078	NorthernBobwhite_ScaffoldedDeNovo_contig_40945	772	C2 CALCIUM/LIPID-BINDING DOMAIN, CALB
ENSGALT00000038940	NorthernBobwhite_ScaffoldedDeNovo_contig_12833	828	C20H20ORF108
ENSGALT00000006887	NorthernBobwhite_ScaffoldedDeNovo_contig_15323	2524	C20H20ORF111
ENSGALT00000001580	NorthernBobwhite_ScaffoldedDeNovo_contig_2723	11198	C20H20ORF24
ENSGALT00000040660	NorthernBobwhite_ScaffoldedDeNovo_contig_1073	31824	C20H20ORF4
ENSGALT00000012492	NorthernBobwhite_ScaffoldedDeNovo_contig_13511	15278	C20H20ORF43
ENSGALT00000042979	NorthernBobwhite_ScaffoldedDeNovo_contig_12330	4	C20ORF112
ENSGALT00000011005	NorthernBobwhite_ScaffoldedDeNovo_contig_741	38042	C20ORF134
ENSGALT00000008576	NorthernBobwhite_ScaffoldedDeNovo_contig_25293	65142	C20ORF151
ENSGALT00000010473	NorthernBobwhite_ScaffoldedDeNovo_contig_6157	73874	C20ORF160
ENSGALT00000039059	NorthernBobwhite_ScaffoldedDeNovo_contig_24083	7140	C20ORF174
ENSGALT00000025818	NorthernBobwhite_ScaffoldedDeNovo_contig_20374	53993	C20ORF194
ENSGALT00000033832	NorthernBobwhite_ScaffoldedDeNovo_contig_1526	52889	C20ORF195
ENSGALT00000008871	NorthernBobwhite_ScaffoldedDeNovo_contig_101039	19	C20ORF20
ENSGALT00000014195	NorthernBobwhite_ScaffoldedDeNovo_contig_23707	41606	C20ORF23
ENSGALT00000042811	NorthernBobwhite_ScaffoldedDeNovo_contig_116207	1051	C20ORF27
ENSGALT00000014157	NorthernBobwhite_ScaffoldedDeNovo_contig_18208	20214	C20ORF72
ENSGALT00000044572	NorthernBobwhite_ScaffoldedDeNovo_contig_4240	91458	C20ORF85
ENSGALT00000033804	NorthernBobwhite_ScaffoldedDeNovo_contig_50783	1238	C20ORF96
ENSGALT00000006526	NorthernBobwhite_ScaffoldedDeNovo_contig_7852	692	C21H1ORF158
ENSGALT00000012103	NorthernBobwhite_ScaffoldedDeNovo_contig_156	11788	C21ORF58
ENSGALT00000025685	NorthernBobwhite_ScaffoldedDeNovo_contig_26070	2729	C21ORF62
ENSGALT00000025609	NorthernBobwhite_ScaffoldedDeNovo_contig_18764	18292	C21ORF63
ENSGALT00000025511	NorthernBobwhite_ScaffoldedDeNovo_contig_6661	451	C21ORF7
ENSGALT00000010666	NorthernBobwhite_ScaffoldedDeNovo_contig_18465	94481	C22ORF13
ENSGALT00000020086	NorthernBobwhite_ScaffoldedDeNovo_contig_3412	41595	C22ORF23
ENSGALT00000020590	NorthernBobwhite_ScaffoldedDeNovo_contig_1630	69894	C22ORF28
ENSGALT00000019418	NorthernBobwhite_ScaffoldedDeNovo_contig_9453	33023	C22ORF32
ENSGALT00000020403	NorthernBobwhite_ScaffoldedDeNovo_contig_21206	21551	C22ORF33
ENSGALT00000039951	NorthernBobwhite_ScaffoldedDeNovo_contig_10566	28142	C22ORF39
ENSGALT00000000680	NorthernBobwhite_ScaffoldedDeNovo_contig_1119	67698	C26H6ORF222
ENSGALT00000035250	NorthernBobwhite_ScaffoldedDeNovo_contig_18037	9397	C26H6ORF89
ENSGALT00000006779	NorthernBobwhite_ScaffoldedDeNovo_contig_11724	1023	C28H19ORF10
ENSGALT00000026021	NorthernBobwhite_ScaffoldedDeNovo_contig_27616	4775	C2CD2
ENSGALT00000027981	NorthernBobwhite_ScaffoldedDeNovo_contig_1243	6749	C2CD3
ENSGALT00000001942	NorthernBobwhite_ScaffoldedDeNovo_contig_3099	14351	C2CD4C
ENSGALT00000005772	NorthernBobwhite_ScaffoldedDeNovo_contig_21210	35241	C2CD4C
ENSGALT00000022516	NorthernBobwhite_ScaffoldedDeNovo_contig_7099	78849	C2H18ORF1
ENSGALT00000036917	NorthernBobwhite_ScaffoldedDeNovo_contig_7099	78849	C2H18ORF1
ENSGALT00000008548	NorthernBobwhite_ScaffoldedDeNovo_contig_39426	827	C2H1ORF69
ENSGALT00000033758	NorthernBobwhite_ScaffoldedDeNovo_contig_13751	6383	C2H3
ENSGALT00000045239	NorthernBobwhite_ScaffoldedDeNovo_contig_6910	3754	C2H7ORF41
ENSGALT00000026420	NorthernBobwhite_ScaffoldedDeNovo_contig_6710	46170	C2H8ORF76
ENSGALT00000026776	NorthernBobwhite_ScaffoldedDeNovo_contig_23277	5374	C2ORF18
ENSGALT00000027122	NorthernBobwhite_ScaffoldedDeNovo_contig_87089	226	C2ORF40
ENSGALT00000009737	NorthernBobwhite_ScaffoldedDeNovo_contig_1292	32132	C2ORF54
ENSGALT00000017260	NorthernBobwhite_ScaffoldedDeNovo_contig_14801	90207	C2ORF56
ENSGALT00000029291	NorthernBobwhite_ScaffoldedDeNovo_contig_3523	12369	C2ORF62
ENSGALT00000044497	NorthernBobwhite_ScaffoldedDeNovo_contig_746	10174	C2ORF70
ENSGALT00000014656	NorthernBobwhite_ScaffoldedDeNovo_contig_11841	6921	C2ORF71
ENSGALT00000040125	NorthernBobwhite_ScaffoldedDeNovo_contig_18205	10018	C2ORF72
ENSGALT00000032941	NorthernBobwhite_ScaffoldedDeNovo_contig_20078	13175	C2ORF76
ENSGALT00000015973	NorthernBobwhite_ScaffoldedDeNovo_contig_1800	13718	C2ORF77
ENSGALT00000041313	NorthernBobwhite_ScaffoldedDeNovo_contig_3600	76660	C2ORF82
ENSGALT00000021594	NorthernBobwhite_ScaffoldedDeNovo_contig_12286	574	C3AR1
ENSGALT00000031583	NorthernBobwhite_ScaffoldedDeNovo_contig_32161	24149	C3H2ORF43
ENSGALT00000018251	NorthernBobwhite_ScaffoldedDeNovo_contig_9614	19766	C3H6ORF120
ENSGALT00000020197	NorthernBobwhite_ScaffoldedDeNovo_contig_2234	46673	C3H6ORF72
ENSGALT00000011631	NorthernBobwhite_ScaffoldedDeNovo_contig_12557	137269	C3ORF14
ENSGALT00000024500	NorthernBobwhite_ScaffoldedDeNovo_contig_10509	1723	C3ORF17
ENSGALT00000003506	NorthernBobwhite_ScaffoldedDeNovo_contig_31696	6890	C3ORF18
ENSGALT00000018736	NorthernBobwhite_ScaffoldedDeNovo_contig_12441	8373	C3ORF23
ENSGALT00000024644	NorthernBobwhite_ScaffoldedDeNovo_contig_9465	23384	C3ORF26
ENSGALT00000030462	NorthernBobwhite_ScaffoldedDeNovo_contig_1115	68596	C3ORF30
ENSGALT00000045674	NorthernBobwhite_ScaffoldedDeNovo_contig_9620	10477	C3ORF33
ENSGALT00000024843	NorthernBobwhite_ScaffoldedDeNovo_contig_23993	18196	C3ORF38
ENSGALT00000003699	NorthernBobwhite_ScaffoldedDeNovo_contig_5225	180	C3ORF58
ENSGALT00000008108	NorthernBobwhite_ScaffoldedDeNovo_contig_18580	291	C3ORF75
ENSGALT00000001781	NorthernBobwhite_ScaffoldedDeNovo_contig_38460	1187	C4BPA
ENSGALT00000045833	NorthernBobwhite_ScaffoldedDeNovo_contig_38227	14465	C4ORF19
ENSGALT00000015738	NorthernBobwhite_ScaffoldedDeNovo_contig_34620	505	C4ORF27
ENSGALT00000016438	NorthernBobwhite_ScaffoldedDeNovo_contig_20955	1201	C4ORF33
ENSGALT00000023145	NorthernBobwhite_ScaffoldedDeNovo_contig_14269	10327	C4ORF34
ENSGALT00000015464	NorthernBobwhite_ScaffoldedDeNovo_contig_10633	188	C4ORF43
ENSGALT00000041399	NorthernBobwhite_ScaffoldedDeNovo_contig_24381	17922	C4ORF48
ENSGALT00000037357	NorthernBobwhite_ScaffoldedDeNovo_contig_31100	26832	C4ORF52
ENSGALT00000017143	NorthernBobwhite_ScaffoldedDeNovo_contig_3032	13631	C521.04C-LIKE
ENSGALT00000021767	NorthernBobwhite_ScaffoldedDeNovo_contig_123712	1873	C5AR1
ENSGALT00000019831	NorthernBobwhite_ScaffoldedDeNovo_contig_8788	17832	C5H11ORF46
ENSGALT00000040146	NorthernBobwhite_ScaffoldedDeNovo_contig_8788	15093	C5H11ORF46
ENSGALT00000009809	NorthernBobwhite_ScaffoldedDeNovo_contig_1704	29342	C5H11ORF58
ENSGALT00000020212	NorthernBobwhite_ScaffoldedDeNovo_contig_6784	14845	C5H14ORF166
ENSGALT00000032630	NorthernBobwhite_ScaffoldedDeNovo_contig_3387	6655	C5H14ORF169
ENSGALT00000007496	NorthernBobwhite_ScaffoldedDeNovo_contig_5330	8668	C5H15ORF23
ENSGALT00000015942	NorthernBobwhite_ScaffoldedDeNovo_contig_5291	26137	C5H15ORF41
ENSGALT00000042927	NorthernBobwhite_ScaffoldedDeNovo_contig_1038	75165	C5ORF13
ENSGALT00000021053	NorthernBobwhite_ScaffoldedDeNovo_contig_15284	6	C5ORF22
ENSGALT00000010296	NorthernBobwhite_ScaffoldedDeNovo_contig_18644	4879	C5ORF24
ENSGALT00000023983	NorthernBobwhite_ScaffoldedDeNovo_contig_21802	20446	C5ORF28
ENSGALT00000043399	NorthernBobwhite_ScaffoldedDeNovo_contig_12436	48	C5ORF30
ENSGALT00000006327	NorthernBobwhite_ScaffoldedDeNovo_contig_1157	391	C5ORF4
ENSGALT00000045026	NorthernBobwhite_ScaffoldedDeNovo_contig_19013	17689	C5ORF47
ENSGALT00000044270	NorthernBobwhite_ScaffoldedDeNovo_contig_1330	84642	C5ORF49
ENSGALT00000042717	NorthernBobwhite_ScaffoldedDeNovo_contig_18850	13985	C5ORF63
ENSGALT00000015155	NorthernBobwhite_ScaffoldedDeNovo_contig_10048	800	C6H10ORF46
ENSGALT00000034212	NorthernBobwhite_ScaffoldedDeNovo_contig_18164	13634	C6H10ORF57
ENSGALT00000022440	NorthernBobwhite_ScaffoldedDeNovo_contig_21607	23757	C6ORF115
ENSGALT00000044844	NorthernBobwhite_ScaffoldedDeNovo_contig_6776	9065	C6ORF132
ENSGALT00000026991	NorthernBobwhite_ScaffoldedDeNovo_contig_2098	9064	C6ORF138
ENSGALT00000025493	NorthernBobwhite_ScaffoldedDeNovo_contig_36537	587	C6ORF162
ENSGALT00000045185	NorthernBobwhite_ScaffoldedDeNovo_contig_36537	2558	C6ORF163
ENSGALT00000025491	NorthernBobwhite_ScaffoldedDeNovo_contig_57754	154	C6ORF165
ENSGALT00000024659	NorthernBobwhite_ScaffoldedDeNovo_contig_1962	2210	C6ORF183
ENSGALT00000024297	NorthernBobwhite_ScaffoldedDeNovo_contig_7461	5073	C6ORF186
ENSGALT00000037419	NorthernBobwhite_ScaffoldedDeNovo_contig_4135	9568	C6ORF191
ENSGALT00000024723	NorthernBobwhite_ScaffoldedDeNovo_contig_6336	69936	C6ORF203
ENSGALT00000043331	NorthernBobwhite_ScaffoldedDeNovo_contig_90683	945	C6ORF211
ENSGALT00000023930	NorthernBobwhite_ScaffoldedDeNovo_contig_6536	4045	C6ORF58
ENSGALT00000030973	NorthernBobwhite_ScaffoldedDeNovo_contig_45168	7747	C6ORF62
ENSGALT00000013202	NorthernBobwhite_ScaffoldedDeNovo_contig_14649	8733	C7H2ORF69
ENSGALT00000020141	NorthernBobwhite_ScaffoldedDeNovo_contig_29627	5975	C7ORF10
ENSGALT00000037440	NorthernBobwhite_ScaffoldedDeNovo_contig_16377	39884	C7ORF10
ENSGALT00000045147	NorthernBobwhite_ScaffoldedDeNovo_contig_22239	8842	C7ORF10
ENSGALT00000010717	NorthernBobwhite_ScaffoldedDeNovo_contig_45	506765	C7ORF23
ENSGALT00000020152	NorthernBobwhite_ScaffoldedDeNovo_contig_5484	16777	C7ORF25
ENSGALT00000012273	NorthernBobwhite_ScaffoldedDeNovo_contig_94	72611	C7ORF26
ENSGALT00000017956	NorthernBobwhite_ScaffoldedDeNovo_contig_2532	42882	C7ORF31
ENSGALT00000040314	NorthernBobwhite_ScaffoldedDeNovo_contig_3032	40887	C7ORF45
ENSGALT00000034197	NorthernBobwhite_ScaffoldedDeNovo_contig_6470	144825	C7ORF50
ENSGALT00000030698	NorthernBobwhite_ScaffoldedDeNovo_contig_14548	23649	C7ORF53
ENSGALT00000019343	NorthernBobwhite_ScaffoldedDeNovo_contig_11408	107670	C7ORF55
ENSGALT00000021342	NorthernBobwhite_ScaffoldedDeNovo_contig_22016	5544	C7ORF57
ENSGALT00000021362	NorthernBobwhite_ScaffoldedDeNovo_contig_85760	694	C7ORF72
ENSGALT00000040479	NorthernBobwhite_ScaffoldedDeNovo_contig_4817	103682	C8G
ENSGALT00000008146	NorthernBobwhite_ScaffoldedDeNovo_contig_11448	35072	C8H1ORF27
ENSGALT00000041400	NorthernBobwhite_ScaffoldedDeNovo_contig_37885	967	C8ORF22
ENSGALT00000025097	NorthernBobwhite_ScaffoldedDeNovo_contig_4710	28140	C8ORF34
ENSGALT00000025766	NorthernBobwhite_ScaffoldedDeNovo_contig_2588	955	C8ORF37
ENSGALT00000040657	NorthernBobwhite_ScaffoldedDeNovo_contig_4564	29594	C8ORF4
ENSGALT00000016490	NorthernBobwhite_ScaffoldedDeNovo_contig_4374	21596	C8ORF40
ENSGALT00000026386	NorthernBobwhite_ScaffoldedDeNovo_contig_120541	1	C8ORF42
ENSGALT00000022825	NorthernBobwhite_ScaffoldedDeNovo_contig_12965	38977	C8ORF46
ENSGALT00000043446	NorthernBobwhite_ScaffoldedDeNovo_contig_25346	71673	C8ORF79
ENSGALT00000004088	NorthernBobwhite_ScaffoldedDeNovo_contig_30	51413	C9ORF100
ENSGALT00000043683	NorthernBobwhite_ScaffoldedDeNovo_contig_1448	146557	C9ORF105
ENSGALT00000007359	NorthernBobwhite_ScaffoldedDeNovo_contig_1230	1076	C9ORF114
ENSGALT00000038804	NorthernBobwhite_ScaffoldedDeNovo_contig_45298	7744	C9ORF152
ENSGALT00000007637	NorthernBobwhite_ScaffoldedDeNovo_contig_7179	7480	C9ORF16
ENSGALT00000042847	NorthernBobwhite_ScaffoldedDeNovo_contig_4817	159614	C9ORF172
ENSGALT00000009347	NorthernBobwhite_ScaffoldedDeNovo_contig_11774	98571	C9ORF24
ENSGALT00000020595	NorthernBobwhite_ScaffoldedDeNovo_contig_9103	6020	C9ORF3
ENSGALT00000044337	NorthernBobwhite_ScaffoldedDeNovo_contig_89242	33	C9ORF4
ENSGALT00000020559	NorthernBobwhite_ScaffoldedDeNovo_contig_71002	415	C9ORF64
ENSGALT00000038477	NorthernBobwhite_ScaffoldedDeNovo_contig_11860	35315	C9ORF71
ENSGALT00000002894	NorthernBobwhite_ScaffoldedDeNovo_contig_1137	89895	C9ORF72
ENSGALT00000006601	NorthernBobwhite_ScaffoldedDeNovo_contig_27885	1151	C9ORF78
ENSGALT00000043348	NorthernBobwhite_ScaffoldedDeNovo_contig_27226	6830	C9ORF89
ENSGALT00000005551	NorthernBobwhite_ScaffoldedDeNovo_contig_4632	28311	C9ORF9
ENSGALT00000011638	NorthernBobwhite_ScaffoldedDeNovo_contig_16272	48240	C9ORF91
ENSGALT00000004742	NorthernBobwhite_ScaffoldedDeNovo_contig_470	41030	CA10
ENSGALT00000039628	NorthernBobwhite_ScaffoldedDeNovo_contig_4978	131980	CA12
ENSGALT00000025504	NorthernBobwhite_ScaffoldedDeNovo_contig_2236	40333	CA13
ENSGALT00000045610	NorthernBobwhite_ScaffoldedDeNovo_contig_106346	571	CA14
ENSGALT00000025572	NorthernBobwhite_ScaffoldedDeNovo_contig_904	12511	CA2
ENSGALT00000008605	NorthernBobwhite_ScaffoldedDeNovo_contig_337	81077	CA4
ENSGALT00000003763	NorthernBobwhite_ScaffoldedDeNovo_contig_2935	62826	CA6
ENSGALT00000034416	NorthernBobwhite_ScaffoldedDeNovo_contig_12478	50211	CA9
ENSGALT00000002709	NorthernBobwhite_ScaffoldedDeNovo_contig_12386	47951	CAAP1
ENSGALT00000043897	NorthernBobwhite_ScaffoldedDeNovo_contig_4027	4867	CAB39
ENSGALT00000027469	NorthernBobwhite_ScaffoldedDeNovo_contig_2141	15001	CAB39L
ENSGALT00000024186	NorthernBobwhite_ScaffoldedDeNovo_contig_3608	52957	CABLES1
ENSGALT00000008570	NorthernBobwhite_ScaffoldedDeNovo_contig_26122	3167	CABLES2
ENSGALT00000011529	NorthernBobwhite_ScaffoldedDeNovo_contig_9890	69458	CABP1
ENSGALT00000045911	NorthernBobwhite_ScaffoldedDeNovo_contig_9053	24937	CABP4
ENSGALT00000021804	NorthernBobwhite_ScaffoldedDeNovo_contig_4218	18264	CABP7
ENSGALT00000024319	NorthernBobwhite_ScaffoldedDeNovo_contig_9059	31843	CABYR
ENSGALT00000042742	NorthernBobwhite_ScaffoldedDeNovo_contig_15856	21352	CACFD1
ENSGALT00000017959	NorthernBobwhite_ScaffoldedDeNovo_contig_1393	50797	CACHD1
ENSGALT00000040094	NorthernBobwhite_ScaffoldedDeNovo_contig_7117	13836	CACNA1B
ENSGALT00000040102	NorthernBobwhite_ScaffoldedDeNovo_contig_7117	13836	CACNA1B
ENSGALT00000008381	NorthernBobwhite_ScaffoldedDeNovo_contig_8166	13604	CACNA1H
ENSGALT00000042794	NorthernBobwhite_ScaffoldedDeNovo_contig_2243	104873	CACNA2D2
ENSGALT00000008674	NorthernBobwhite_ScaffoldedDeNovo_contig_38634	25915	CACNA2D3
ENSGALT00000043800	NorthernBobwhite_ScaffoldedDeNovo_contig_41194	3429	CACNB1
ENSGALT00000013988	NorthernBobwhite_ScaffoldedDeNovo_contig_11028	1065	CACNB2
ENSGALT00000020437	NorthernBobwhite_ScaffoldedDeNovo_contig_21972	6135	CACNB4
ENSGALT00000020438	NorthernBobwhite_ScaffoldedDeNovo_contig_21896	12710	CACNB4
ENSGALT00000006197	NorthernBobwhite_ScaffoldedDeNovo_contig_42022	42418	CACNG1
ENSGALT00000045934	NorthernBobwhite_ScaffoldedDeNovo_contig_42022	42424	CACNG1
ENSGALT00000046134	NorthernBobwhite_ScaffoldedDeNovo_contig_8941	52091	CACNG3
ENSGALT00000042721	NorthernBobwhite_ScaffoldedDeNovo_contig_42022	13	CACNG4
ENSGALT00000045133	NorthernBobwhite_ScaffoldedDeNovo_contig_42022	144	CACNG4
ENSGALT00000006226	NorthernBobwhite_ScaffoldedDeNovo_contig_19880	25197	CACNG5
ENSGALT00000043235	NorthernBobwhite_ScaffoldedDeNovo_contig_19880	24534	CACNG5
ENSGALT00000041266	NorthernBobwhite_ScaffoldedDeNovo_contig_21567	16522	CACTIN
ENSGALT00000007248	NorthernBobwhite_ScaffoldedDeNovo_contig_2965	135675	CACYBP
ENSGALT00000040293	NorthernBobwhite_ScaffoldedDeNovo_contig_1427	11892	CADHERIN
ENSGALT00000004187	NorthernBobwhite_ScaffoldedDeNovo_contig_5395	173	CADHERIN-LIKE
ENSGALT00000023514	NorthernBobwhite_ScaffoldedDeNovo_contig_2351	10029	CADM1
ENSGALT00000024993	NorthernBobwhite_ScaffoldedDeNovo_contig_22842	26210	CADM2
ENSGALT00000046179	NorthernBobwhite_ScaffoldedDeNovo_contig_30000	988	CADM3
ENSGALT00000014508	NorthernBobwhite_ScaffoldedDeNovo_contig_4416	171267	CADPS2
ENSGALT00000026445	NorthernBobwhite_ScaffoldedDeNovo_contig_12799	1	CALB1
ENSGALT00000042987	NorthernBobwhite_ScaffoldedDeNovo_contig_10657	9743	CALB2
ENSGALT00000009761	NorthernBobwhite_ScaffoldedDeNovo_contig_32062	64534	CALCA
ENSGALT00000009762	NorthernBobwhite_ScaffoldedDeNovo_contig_32062	65973	CALCA
ENSGALT00000024529	NorthernBobwhite_ScaffoldedDeNovo_contig_16411	17881	CALCIUM/CALMODULIN-DEPENDENT PROTIEN KINASE TYPE IV-LIKE
ENSGALT00000034319	NorthernBobwhite_ScaffoldedDeNovo_contig_8009	9990	CALCIUM-BINDING EF-HAND
ENSGALT00000008388	NorthernBobwhite_ScaffoldedDeNovo_contig_11087	35508	CALCIUM-BINDING PROTEIN 2
ENSGALT00000002317	NorthernBobwhite_ScaffoldedDeNovo_contig_2678	21346	CALCOCO2
ENSGALT00000015478	NorthernBobwhite_ScaffoldedDeNovo_contig_48101	107	CALCR
ENSGALT00000004147	NorthernBobwhite_ScaffoldedDeNovo_contig_24326	5844	CALCRL
ENSGALT00000021345	NorthernBobwhite_ScaffoldedDeNovo_contig_55588	11073	CALD1
ENSGALT00000013463	NorthernBobwhite_ScaffoldedDeNovo_contig_12599	59610	CALHM1
ENSGALT00000013462	NorthernBobwhite_ScaffoldedDeNovo_contig_12599	53417	CALHM2
ENSGALT00000013465	NorthernBobwhite_ScaffoldedDeNovo_contig_12599	65316	CALHM3
ENSGALT00000016279	NorthernBobwhite_ScaffoldedDeNovo_contig_6300	86722	CALM
ENSGALT00000045488	NorthernBobwhite_ScaffoldedDeNovo_contig_1597	46682	CALM
ENSGALT00000040245	NorthernBobwhite_ScaffoldedDeNovo_contig_5712	14790	CALML3
ENSGALT00000012956	NorthernBobwhite_ScaffoldedDeNovo_contig_6325	7524	CALML4
ENSGALT00000001691	NorthernBobwhite_ScaffoldedDeNovo_contig_6063	39431	CALN1
ENSGALT00000044347	NorthernBobwhite_ScaffoldedDeNovo_contig_2531	4616	CALPONIN HOMOLOGY DOMAIN
ENSGALT00000045117	NorthernBobwhite_ScaffoldedDeNovo_contig_22723	36	CALR
ENSGALT00000006232	NorthernBobwhite_ScaffoldedDeNovo_contig_8942	75044	CALR3
ENSGALT00000010798	NorthernBobwhite_ScaffoldedDeNovo_contig_18263	21413	CAMK1
ENSGALT00000016041	NorthernBobwhite_ScaffoldedDeNovo_contig_6344	1	CAMK1D
ENSGALT00000002011	NorthernBobwhite_ScaffoldedDeNovo_contig_30985	6548	CAMK1G
ENSGALT00000009020	NorthernBobwhite_ScaffoldedDeNovo_contig_1349	133731	CAMK2A
ENSGALT00000040483	NorthernBobwhite_ScaffoldedDeNovo_contig_1349	133731	CAMK2A
ENSGALT00000019642	NorthernBobwhite_ScaffoldedDeNovo_contig_2754	130613	CAMK2D
ENSGALT00000037701	NorthernBobwhite_ScaffoldedDeNovo_contig_2754	130613	CAMK2D
ENSGALT00000033583	NorthernBobwhite_ScaffoldedDeNovo_contig_2265	28268	CAMK2G
ENSGALT00000002468	NorthernBobwhite_ScaffoldedDeNovo_contig_23885	3374	CAMKK1
ENSGALT00000006388	NorthernBobwhite_ScaffoldedDeNovo_contig_17114	5652	CAMKK2
ENSGALT00000035543	NorthernBobwhite_ScaffoldedDeNovo_contig_70	4168	CAMKV
ENSGALT00000010349	NorthernBobwhite_ScaffoldedDeNovo_contig_31229	11863	CAMLG
ENSGALT00000031295	NorthernBobwhite_ScaffoldedDeNovo_contig_13390	12	CAMP
ENSGALT00000044161	NorthernBobwhite_ScaffoldedDeNovo_contig_19226	7239	CAMP SPECIFIC 3' 5' CYCLIC PHOSPHODIESTERASE
ENSGALT00000002593	NorthernBobwhite_ScaffoldedDeNovo_contig_15052	30262	CAMSAP1
ENSGALT00000000862	NorthernBobwhite_ScaffoldedDeNovo_contig_3477	3656	CAMTA1
ENSGALT00000016099	NorthernBobwhite_ScaffoldedDeNovo_contig_31450	7920	CAND1
ENSGALT00000013716	NorthernBobwhite_ScaffoldedDeNovo_contig_6094	475	CAND2
ENSGALT00000019296	NorthernBobwhite_ScaffoldedDeNovo_contig_3355	1466	CANT1
ENSGALT00000009563	NorthernBobwhite_ScaffoldedDeNovo_contig_820	186306	CANX
ENSGALT00000006228	NorthernBobwhite_ScaffoldedDeNovo_contig_22191	7692	CAP1
ENSGALT00000020760	NorthernBobwhite_ScaffoldedDeNovo_contig_41396	2684	CAP2
ENSGALT00000044035	NorthernBobwhite_ScaffoldedDeNovo_contig_12817	21810	CAPG
ENSGALT00000016557	NorthernBobwhite_ScaffoldedDeNovo_contig_10158	41214	CAPN1
ENSGALT00000014759	NorthernBobwhite_ScaffoldedDeNovo_contig_4339	38640	CAPN13
ENSGALT00000032636	NorthernBobwhite_ScaffoldedDeNovo_contig_24763	52272	CAPN3
ENSGALT00000001093	NorthernBobwhite_ScaffoldedDeNovo_contig_12606	14992	CAPN5
ENSGALT00000018152	NorthernBobwhite_ScaffoldedDeNovo_contig_41298	15334	CAPN9
ENSGALT00000022035	NorthernBobwhite_ScaffoldedDeNovo_contig_12882	11168	CAPRIN1
ENSGALT00000021117	NorthernBobwhite_ScaffoldedDeNovo_contig_20488	24761	CAPRIN2
ENSGALT00000021820	NorthernBobwhite_ScaffoldedDeNovo_contig_4119	86015	CAPSL
ENSGALT00000002351	NorthernBobwhite_ScaffoldedDeNovo_contig_10266	612	CAPZA1
ENSGALT00000015293	NorthernBobwhite_ScaffoldedDeNovo_contig_16013	6002	CAPZA2
ENSGALT00000021428	NorthernBobwhite_ScaffoldedDeNovo_contig_17567	51702	CAPZA3
ENSGALT00000006424	NorthernBobwhite_ScaffoldedDeNovo_contig_81271	138	CAPZB
ENSGALT00000006425	NorthernBobwhite_ScaffoldedDeNovo_contig_81271	137	CAPZB
ENSGALT00000020331	NorthernBobwhite_ScaffoldedDeNovo_contig_3035	28737	CARD10
ENSGALT00000007013	NorthernBobwhite_ScaffoldedDeNovo_contig_4247	45911	CARD11
ENSGALT00000012474	NorthernBobwhite_ScaffoldedDeNovo_contig_2531	45350	CARD8
ENSGALT00000002925	NorthernBobwhite_ScaffoldedDeNovo_contig_2042	3360	CARD9
ENSGALT00000027212	NorthernBobwhite_ScaffoldedDeNovo_contig_100	17766	CARKD
ENSGALT00000010375	NorthernBobwhite_ScaffoldedDeNovo_contig_16142	45430	CARS
ENSGALT00000010376	NorthernBobwhite_ScaffoldedDeNovo_contig_16142	17817	CARS
ENSGALT00000044320	NorthernBobwhite_ScaffoldedDeNovo_contig_73136	66	CARTPT
ENSGALT00000022723	NorthernBobwhite_ScaffoldedDeNovo_contig_110782	129	CASC1
ENSGALT00000013365	NorthernBobwhite_ScaffoldedDeNovo_contig_134464	313	CASC4
ENSGALT00000007198	NorthernBobwhite_ScaffoldedDeNovo_contig_19333	35463	CASC5
ENSGALT00000015717	NorthernBobwhite_ScaffoldedDeNovo_contig_18481	990	CASD1
ENSGALT00000015719	NorthernBobwhite_ScaffoldedDeNovo_contig_18481	1020	CASD1
ENSGALT00000026163	NorthernBobwhite_ScaffoldedDeNovo_contig_20386	2138	CASK
ENSGALT00000009388	NorthernBobwhite_ScaffoldedDeNovo_contig_11498	18623	CASKIN1
ENSGALT00000013031	NorthernBobwhite_ScaffoldedDeNovo_contig_8216	97435	CASKIN2
ENSGALT00000002791	NorthernBobwhite_ScaffoldedDeNovo_contig_1520	10960	CASP, C-TERMINAL
ENSGALT00000001571	NorthernBobwhite_ScaffoldedDeNovo_contig_4598	19668	CASP1
ENSGALT00000013521	NorthernBobwhite_ScaffoldedDeNovo_contig_336	11698	CASP10
ENSGALT00000023309	NorthernBobwhite_ScaffoldedDeNovo_contig_12817	51888	CASP17
ENSGALT00000044594	NorthernBobwhite_ScaffoldedDeNovo_contig_12817	51888	CASP17
ENSGALT00000039142	NorthernBobwhite_ScaffoldedDeNovo_contig_336	25782	CASP18
ENSGALT00000017308	NorthernBobwhite_ScaffoldedDeNovo_contig_6088	511	CASP3
ENSGALT00000019897	NorthernBobwhite_ScaffoldedDeNovo_contig_14115	5286	CASP6
ENSGALT00000014519	NorthernBobwhite_ScaffoldedDeNovo_contig_391	35563	CASP7
ENSGALT00000013606	NorthernBobwhite_ScaffoldedDeNovo_contig_336	36993	CASP8
ENSGALT00000036952	NorthernBobwhite_ScaffoldedDeNovo_contig_6434	17374	CASQ2
ENSGALT00000023275	NorthernBobwhite_ScaffoldedDeNovo_contig_7966	4868	CASR
ENSGALT00000012554	NorthernBobwhite_ScaffoldedDeNovo_contig_3978	16776	CASS4
ENSGALT00000004554	NorthernBobwhite_ScaffoldedDeNovo_contig_8671	128137	CASZ1
ENSGALT00000043155	NorthernBobwhite_ScaffoldedDeNovo_contig_162767	60	CATHB1
ENSGALT00000045759	NorthernBobwhite_ScaffoldedDeNovo_contig_13390	4077	CATHL1
ENSGALT00000031294	NorthernBobwhite_ScaffoldedDeNovo_contig_13390	4555	CATHL2
ENSGALT00000015303	NorthernBobwhite_ScaffoldedDeNovo_contig_14508	12726	CAV1
ENSGALT00000015306	NorthernBobwhite_ScaffoldedDeNovo_contig_14508	34005	CAV2
ENSGALT00000013599	NorthernBobwhite_ScaffoldedDeNovo_contig_1245	52987	CAV3
ENSGALT00000004893	NorthernBobwhite_ScaffoldedDeNovo_contig_60989	517	CBFA2T2
ENSGALT00000038903	NorthernBobwhite_ScaffoldedDeNovo_contig_68544	2215	CBFA2T3
ENSGALT00000005022	NorthernBobwhite_ScaffoldedDeNovo_contig_1141	35399	CBFB
ENSGALT00000010949	NorthernBobwhite_ScaffoldedDeNovo_contig_12452	38006	CBL
ENSGALT00000024772	NorthernBobwhite_ScaffoldedDeNovo_contig_113482	114	CBLB
ENSGALT00000043578	NorthernBobwhite_ScaffoldedDeNovo_contig_3022	214362	CBLL1
ENSGALT00000006191	NorthernBobwhite_ScaffoldedDeNovo_contig_1701	119081	CBLN1
ENSGALT00000043443	NorthernBobwhite_ScaffoldedDeNovo_contig_21147	17694	CBLN2
ENSGALT00000012611	NorthernBobwhite_ScaffoldedDeNovo_contig_832	3298	CBLN4
ENSGALT00000036747	NorthernBobwhite_ScaffoldedDeNovo_contig_63183	469	CBR1
ENSGALT00000015813	NorthernBobwhite_ScaffoldedDeNovo_contig_13464	9316	CBR4
ENSGALT00000029894	NorthernBobwhite_ScaffoldedDeNovo_contig_47164	20689	CBX1
ENSGALT00000045933	NorthernBobwhite_ScaffoldedDeNovo_contig_47164	20695	CBX1
ENSGALT00000038433	NorthernBobwhite_ScaffoldedDeNovo_contig_41296	3340	CBX2
ENSGALT00000017979	NorthernBobwhite_ScaffoldedDeNovo_contig_6584	43377	CBX3
ENSGALT00000011440	NorthernBobwhite_ScaffoldedDeNovo_contig_2565	106407	CBX4
ENSGALT00000037871	NorthernBobwhite_ScaffoldedDeNovo_contig_8556	7368	CBX7
ENSGALT00000045479	NorthernBobwhite_ScaffoldedDeNovo_contig_41296	13150	CBX8
ENSGALT00000017276	NorthernBobwhite_ScaffoldedDeNovo_contig_10126	23766	CC2D1B
ENSGALT00000043658	NorthernBobwhite_ScaffoldedDeNovo_contig_30	62669	CCBE1
ENSGALT00000008506	NorthernBobwhite_ScaffoldedDeNovo_contig_32386	5735	CCBP2
ENSGALT00000022076	NorthernBobwhite_ScaffoldedDeNovo_contig_13785	1708	CCDC102A
ENSGALT00000030959	NorthernBobwhite_ScaffoldedDeNovo_contig_21216	4230	CCDC102B
ENSGALT00000001352	NorthernBobwhite_ScaffoldedDeNovo_contig_23362	37561	CCDC103
ENSGALT00000013093	NorthernBobwhite_ScaffoldedDeNovo_contig_10274	5356	CCDC104
ENSGALT00000035442	NorthernBobwhite_ScaffoldedDeNovo_contig_18666	1009	CCDC107
ENSGALT00000019912	NorthernBobwhite_ScaffoldedDeNovo_contig_14115	18	CCDC109B
ENSGALT00000037509	NorthernBobwhite_ScaffoldedDeNovo_contig_168140	298	CCDC112
ENSGALT00000001300	NorthernBobwhite_ScaffoldedDeNovo_contig_3187	805	CCDC113
ENSGALT00000009289	NorthernBobwhite_ScaffoldedDeNovo_contig_4672	27167	CCDC117
ENSGALT00000008812	NorthernBobwhite_ScaffoldedDeNovo_contig_15273	13545	CCDC12
ENSGALT00000027420	NorthernBobwhite_ScaffoldedDeNovo_contig_12353	22588	CCDC122
ENSGALT00000025105	NorthernBobwhite_ScaffoldedDeNovo_contig_10823	33383	CCDC125
ENSGALT00000017882	NorthernBobwhite_ScaffoldedDeNovo_contig_47608	385	CCDC126
ENSGALT00000021512	NorthernBobwhite_ScaffoldedDeNovo_contig_16186	124	CCDC127
ENSGALT00000045477	NorthernBobwhite_ScaffoldedDeNovo_contig_16186	124	CCDC127
ENSGALT00000008504	NorthernBobwhite_ScaffoldedDeNovo_contig_10411	17690	CCDC13
ENSGALT00000015463	NorthernBobwhite_ScaffoldedDeNovo_contig_7477	139303	CCDC132
ENSGALT00000019444	NorthernBobwhite_ScaffoldedDeNovo_contig_2798	26659	CCDC134
ENSGALT00000007177	NorthernBobwhite_ScaffoldedDeNovo_contig_8851	5436	CCDC137
ENSGALT00000043386	NorthernBobwhite_ScaffoldedDeNovo_contig_9422	151160	CCDC146
ENSGALT00000000563	NorthernBobwhite_ScaffoldedDeNovo_contig_17175	28594	CCDC15
ENSGALT00000038970	NorthernBobwhite_ScaffoldedDeNovo_contig_9202	6093	CCDC152
ENSGALT00000044211	NorthernBobwhite_ScaffoldedDeNovo_contig_9202	6093	CCDC152
ENSGALT00000034393	NorthernBobwhite_ScaffoldedDeNovo_contig_9899	21473	CCDC153
ENSGALT00000012834	NorthernBobwhite_ScaffoldedDeNovo_contig_22047	11662	CCDC157
ENSGALT00000042803	NorthernBobwhite_ScaffoldedDeNovo_contig_22047	12629	CCDC157
ENSGALT00000045417	NorthernBobwhite_ScaffoldedDeNovo_contig_22047	11662	CCDC157
ENSGALT00000016501	NorthernBobwhite_ScaffoldedDeNovo_contig_467	13546	CCDC167
ENSGALT00000016707	NorthernBobwhite_ScaffoldedDeNovo_contig_1624	128903	CCDC17
ENSGALT00000024368	NorthernBobwhite_ScaffoldedDeNovo_contig_15443	1124	CCDC171
ENSGALT00000014957	NorthernBobwhite_ScaffoldedDeNovo_contig_16861	4457	CCDC172
ENSGALT00000032568	NorthernBobwhite_ScaffoldedDeNovo_contig_8029	11844	CCDC176
ENSGALT00000044713	NorthernBobwhite_ScaffoldedDeNovo_contig_74002	1264	CCDC177
ENSGALT00000045517	NorthernBobwhite_ScaffoldedDeNovo_contig_74002	1597	CCDC177
ENSGALT00000030914	NorthernBobwhite_ScaffoldedDeNovo_contig_19841	8025	CCDC178
ENSGALT00000009470	NorthernBobwhite_ScaffoldedDeNovo_contig_47973	7529	CCDC18
ENSGALT00000023008	NorthernBobwhite_ScaffoldedDeNovo_contig_763	7302	CCDC19
ENSGALT00000026773	NorthernBobwhite_ScaffoldedDeNovo_contig_40319	6197	CCDC25
ENSGALT00000022449	NorthernBobwhite_ScaffoldedDeNovo_contig_25122	258	CCDC28A
ENSGALT00000005127	NorthernBobwhite_ScaffoldedDeNovo_contig_196829	260	CCDC28B
ENSGALT00000045091	NorthernBobwhite_ScaffoldedDeNovo_contig_10314	30	CCDC3
ENSGALT00000043072	NorthernBobwhite_ScaffoldedDeNovo_contig_3416	28880	CCDC33
ENSGALT00000019910	NorthernBobwhite_ScaffoldedDeNovo_contig_9704	19338	CCDC34
ENSGALT00000036240	NorthernBobwhite_ScaffoldedDeNovo_contig_5716	4826	CCDC36
ENSGALT00000030640	NorthernBobwhite_ScaffoldedDeNovo_contig_93975	168	CCDC41
ENSGALT00000001821	NorthernBobwhite_ScaffoldedDeNovo_contig_9929	15762	CCDC42
ENSGALT00000043476	NorthernBobwhite_ScaffoldedDeNovo_contig_8932	7899	CCDC42B
ENSGALT00000036273	NorthernBobwhite_ScaffoldedDeNovo_contig_91297	74	CCDC48
ENSGALT00000010440	NorthernBobwhite_ScaffoldedDeNovo_contig_43818	8538	CCDC51
ENSGALT00000020822	NorthernBobwhite_ScaffoldedDeNovo_contig_1454	21085	CCDC53
ENSGALT00000023287	NorthernBobwhite_ScaffoldedDeNovo_contig_7966	30487	CCDC58
ENSGALT00000005015	NorthernBobwhite_ScaffoldedDeNovo_contig_3560	43997	CCDC6
ENSGALT00000011928	NorthernBobwhite_ScaffoldedDeNovo_contig_13437	39220	CCDC60
ENSGALT00000010861	NorthernBobwhite_ScaffoldedDeNovo_contig_12668	16146	CCDC61
ENSGALT00000007288	NorthernBobwhite_ScaffoldedDeNovo_contig_22498	12758	CCDC63
ENSGALT00000011840	NorthernBobwhite_ScaffoldedDeNovo_contig_45833	1	CCDC64
ENSGALT00000008746	NorthernBobwhite_ScaffoldedDeNovo_contig_7619	59511	CCDC66
ENSGALT00000045114	NorthernBobwhite_ScaffoldedDeNovo_contig_1690	180865	CCDC71L
ENSGALT00000019767	NorthernBobwhite_ScaffoldedDeNovo_contig_5995	24990	CCDC73
ENSGALT00000017184	NorthernBobwhite_ScaffoldedDeNovo_contig_13088	21650	CCDC75
ENSGALT00000045501	NorthernBobwhite_ScaffoldedDeNovo_contig_19157	10668	CCDC78
ENSGALT00000024512	NorthernBobwhite_ScaffoldedDeNovo_contig_2630	63682	CCDC80
ENSGALT00000043806	NorthernBobwhite_ScaffoldedDeNovo_contig_5508	23473	CCDC81
ENSGALT00000025079	NorthernBobwhite_ScaffoldedDeNovo_contig_67218	111	CCDC81
ENSGALT00000021629	NorthernBobwhite_ScaffoldedDeNovo_contig_6856	6036	CCDC83
ENSGALT00000012464	NorthernBobwhite_ScaffoldedDeNovo_contig_154995	344	CCDC84
ENSGALT00000045370	NorthernBobwhite_ScaffoldedDeNovo_contig_154995	344	CCDC84
ENSGALT00000040339	NorthernBobwhite_ScaffoldedDeNovo_contig_14147	8124	CCDC85A
ENSGALT00000018168	NorthernBobwhite_ScaffoldedDeNovo_contig_4310	23183	CCDC85C
ENSGALT00000008339	NorthernBobwhite_ScaffoldedDeNovo_contig_3054	12806	CCDC86
ENSGALT00000013157	NorthernBobwhite_ScaffoldedDeNovo_contig_8758	6857	CCDC88A
ENSGALT00000022777	NorthernBobwhite_ScaffoldedDeNovo_contig_14569	9165	CCDC89
ENSGALT00000004974	NorthernBobwhite_ScaffoldedDeNovo_contig_828	45428	CCDC92
ENSGALT00000046182	NorthernBobwhite_ScaffoldedDeNovo_contig_828	44946	CCDC92
ENSGALT00000043727	NorthernBobwhite_ScaffoldedDeNovo_contig_4759	104641	CCDC92
ENSGALT00000019817	NorthernBobwhite_ScaffoldedDeNovo_contig_7954	54030	CCDC93
ENSGALT00000045894	NorthernBobwhite_ScaffoldedDeNovo_contig_205309	20	CCDC94
ENSGALT00000037242	NorthernBobwhite_ScaffoldedDeNovo_contig_28097	14328	CCDC96
ENSGALT00000018281	NorthernBobwhite_ScaffoldedDeNovo_contig_1649	50463	CCDC98
ENSGALT00000019477	NorthernBobwhite_ScaffoldedDeNovo_contig_20949	28561	CCK
ENSGALT00000023203	NorthernBobwhite_ScaffoldedDeNovo_contig_3677	24772	CCK1R
ENSGALT00000003670	NorthernBobwhite_ScaffoldedDeNovo_contig_22477	16440	CCL1
ENSGALT00000041379	NorthernBobwhite_ScaffoldedDeNovo_contig_14509	43133	CCL17
ENSGALT00000045089	NorthernBobwhite_ScaffoldedDeNovo_contig_19422	24173	CCL19
ENSGALT00000001404	NorthernBobwhite_ScaffoldedDeNovo_contig_12644	6227	CCL4
ENSGALT00000001410	NorthernBobwhite_ScaffoldedDeNovo_contig_597	1103	CCL4
ENSGALT00000040643	NorthernBobwhite_ScaffoldedDeNovo_contig_597	5667	CCL4
ENSGALT00000040645	NorthernBobwhite_ScaffoldedDeNovo_contig_12644	6903	CCL4
ENSGALT00000040649	NorthernBobwhite_ScaffoldedDeNovo_contig_597	1103	CCL4
ENSGALT00000023517	NorthernBobwhite_ScaffoldedDeNovo_contig_86453	510	CCLI10
ENSGALT00000041383	NorthernBobwhite_ScaffoldedDeNovo_contig_22477	14501	CCLI5
ENSGALT00000045494	NorthernBobwhite_ScaffoldedDeNovo_contig_86453	560	CCLI9
ENSGALT00000009006	NorthernBobwhite_ScaffoldedDeNovo_contig_7862	16722	CCM2
ENSGALT00000027549	NorthernBobwhite_ScaffoldedDeNovo_contig_52252	234	CCNA1
ENSGALT00000019387	NorthernBobwhite_ScaffoldedDeNovo_contig_10252	951	CCNA2
ENSGALT00000006616	NorthernBobwhite_ScaffoldedDeNovo_contig_26723	3053	CCNB2
ENSGALT00000043056	NorthernBobwhite_ScaffoldedDeNovo_contig_2558	4201	CCNB3
ENSGALT00000037233	NorthernBobwhite_ScaffoldedDeNovo_contig_25080	30637	CCNC
ENSGALT00000012217	NorthernBobwhite_ScaffoldedDeNovo_contig_15826	8286	CCND1
ENSGALT00000027938	NorthernBobwhite_ScaffoldedDeNovo_contig_15632	61100	CCND2
ENSGALT00000005513	NorthernBobwhite_ScaffoldedDeNovo_contig_27929	35051	CCND3
ENSGALT00000007724	NorthernBobwhite_ScaffoldedDeNovo_contig_4121	16871	CCNDBP1
ENSGALT00000007159	NorthernBobwhite_ScaffoldedDeNovo_contig_4544	182944	CCNE1
ENSGALT00000025761	NorthernBobwhite_ScaffoldedDeNovo_contig_17078	3994	CCNE2
ENSGALT00000002636	NorthernBobwhite_ScaffoldedDeNovo_contig_60704	3931	CCNG1
ENSGALT00000016846	NorthernBobwhite_ScaffoldedDeNovo_contig_2955	33950	CCNG2
ENSGALT00000018681	NorthernBobwhite_ScaffoldedDeNovo_contig_12829	6163	CCNI
ENSGALT00000039902	NorthernBobwhite_ScaffoldedDeNovo_contig_24720	4827	CCNI2
ENSGALT00000011268	NorthernBobwhite_ScaffoldedDeNovo_contig_59188	1208	CCNJ
ENSGALT00000002210	NorthernBobwhite_ScaffoldedDeNovo_contig_35582	6329	CCNJL
ENSGALT00000018166	NorthernBobwhite_ScaffoldedDeNovo_contig_11455	30082	CCNK
ENSGALT00000002357	NorthernBobwhite_ScaffoldedDeNovo_contig_4599	10410	CCNL2
ENSGALT00000044024	NorthernBobwhite_ScaffoldedDeNovo_contig_95195	100	CCNO
ENSGALT00000019931	NorthernBobwhite_ScaffoldedDeNovo_contig_5803	49305	CCNT2
ENSGALT00000011465	NorthernBobwhite_ScaffoldedDeNovo_contig_2785	4264	CCNY
ENSGALT00000011221	NorthernBobwhite_ScaffoldedDeNovo_contig_5233	49009	CCP110
ENSGALT00000007014	NorthernBobwhite_ScaffoldedDeNovo_contig_56297	2010	CCPG1
ENSGALT00000042858	NorthernBobwhite_ScaffoldedDeNovo_contig_23845	2295	CCR10
ENSGALT00000019505	NorthernBobwhite_ScaffoldedDeNovo_contig_32802	3190	CCR4
ENSGALT00000045900	NorthernBobwhite_ScaffoldedDeNovo_contig_12135	61673	CCR4-NOT COMPLEX COMPONENT, NOT1, C-TERMINAL
ENSGALT00000019165	NorthernBobwhite_ScaffoldedDeNovo_contig_6143	3763	CCR5
ENSGALT00000031830	NorthernBobwhite_ScaffoldedDeNovo_contig_15169	18492	CCR6
ENSGALT00000044268	NorthernBobwhite_ScaffoldedDeNovo_contig_3876	9101	CCR7
ENSGALT00000019167	NorthernBobwhite_ScaffoldedDeNovo_contig_6143	36832	CCR8-201
ENSGALT00000019499	NorthernBobwhite_ScaffoldedDeNovo_contig_25451	340	CCR8-201
ENSGALT00000019271	NorthernBobwhite_ScaffoldedDeNovo_contig_17658	8640	CCR9
ENSGALT00000019133	NorthernBobwhite_ScaffoldedDeNovo_contig_173	63884	CCRL1
ENSGALT00000015887	NorthernBobwhite_ScaffoldedDeNovo_contig_17123	31161	CCRN4L
ENSGALT00000018061	NorthernBobwhite_ScaffoldedDeNovo_contig_5870	128069	CCSAP
ENSGALT00000016925	NorthernBobwhite_ScaffoldedDeNovo_contig_18747	13990	CCSER1
ENSGALT00000044239	NorthernBobwhite_ScaffoldedDeNovo_contig_45592	251	CCT3
ENSGALT00000037092	NorthernBobwhite_ScaffoldedDeNovo_contig_33801	12386	CCT7
ENSGALT00000019168	NorthernBobwhite_ScaffoldedDeNovo_contig_6143	62518	CCXCR1-L
ENSGALT00000005479	NorthernBobwhite_ScaffoldedDeNovo_contig_181592	52	CCZ1
ENSGALT00000024940	NorthernBobwhite_ScaffoldedDeNovo_contig_7820	17403	CD101
ENSGALT00000034888	NorthernBobwhite_ScaffoldedDeNovo_contig_323	10251	CD14
ENSGALT00000039051	NorthernBobwhite_ScaffoldedDeNovo_contig_91	45002	CD151
ENSGALT00000023738	NorthernBobwhite_ScaffoldedDeNovo_contig_10860	92905	CD163
ENSGALT00000024590	NorthernBobwhite_ScaffoldedDeNovo_contig_10514	10782	CD164
ENSGALT00000038670	NorthernBobwhite_ScaffoldedDeNovo_contig_6041	65122	CD180
ENSGALT00000029264	NorthernBobwhite_ScaffoldedDeNovo_contig_19536	2261	CD1A1
ENSGALT00000044343	NorthernBobwhite_ScaffoldedDeNovo_contig_19536	2261	CD1A1
ENSGALT00000024930	NorthernBobwhite_ScaffoldedDeNovo_contig_39913	250	CD2
ENSGALT00000024837	NorthernBobwhite_ScaffoldedDeNovo_contig_32348	13001	CD200
ENSGALT00000030450	NorthernBobwhite_ScaffoldedDeNovo_contig_40474	118	CD200R1
ENSGALT00000030449	NorthernBobwhite_ScaffoldedDeNovo_contig_2630	144185	CD200R1A
ENSGALT00000015929	NorthernBobwhite_ScaffoldedDeNovo_contig_22485	13805	CD20-LIKE
ENSGALT00000030960	NorthernBobwhite_ScaffoldedDeNovo_contig_16456	34511	CD226
ENSGALT00000024242	NorthernBobwhite_ScaffoldedDeNovo_contig_2652	2234	CD274
ENSGALT00000002653	NorthernBobwhite_ScaffoldedDeNovo_contig_300	6558	CD276
ENSGALT00000014115	NorthernBobwhite_ScaffoldedDeNovo_contig_1906	54292	CD28
ENSGALT00000026983	NorthernBobwhite_ScaffoldedDeNovo_contig_9711	70714	CD2AP
ENSGALT00000012503	NorthernBobwhite_ScaffoldedDeNovo_contig_38328	4	CD300A
ENSGALT00000038245	NorthernBobwhite_ScaffoldedDeNovo_contig_38328	7	CD300A
ENSGALT00000043926	NorthernBobwhite_ScaffoldedDeNovo_contig_38328	4	CD300A
ENSGALT00000031378	NorthernBobwhite_ScaffoldedDeNovo_contig_38071	5376	CD300L-S1
ENSGALT00000001786	NorthernBobwhite_ScaffoldedDeNovo_contig_14757	141101	CD34
ENSGALT00000039749	NorthernBobwhite_ScaffoldedDeNovo_contig_4832	7536	CD36
ENSGALT00000023419	NorthernBobwhite_ScaffoldedDeNovo_contig_20415	12359	CD38
ENSGALT00000011998	NorthernBobwhite_ScaffoldedDeNovo_contig_7418	8507	CD3D
ENSGALT00000037104	NorthernBobwhite_ScaffoldedDeNovo_contig_349	62501	CD4
ENSGALT00000039105	NorthernBobwhite_ScaffoldedDeNovo_contig_6091	862	CD40
ENSGALT00000010354	NorthernBobwhite_ScaffoldedDeNovo_contig_42840	2757	CD40LG
ENSGALT00000012746	NorthernBobwhite_ScaffoldedDeNovo_contig_6596	46982	CD44
ENSGALT00000024780	NorthernBobwhite_ScaffoldedDeNovo_contig_1286	15080	CD47
ENSGALT00000030435	NorthernBobwhite_ScaffoldedDeNovo_contig_125383	24	CD47
ENSGALT00000030436	NorthernBobwhite_ScaffoldedDeNovo_contig_1286	15080	CD47
ENSGALT00000032734	NorthernBobwhite_ScaffoldedDeNovo_contig_13240	104	CD5
ENSGALT00000002493	NorthernBobwhite_ScaffoldedDeNovo_contig_7713	78980	CD7
ENSGALT00000003752	NorthernBobwhite_ScaffoldedDeNovo_contig_8208	41232	CD72
ENSGALT00000039337	NorthernBobwhite_ScaffoldedDeNovo_contig_8208	41232	CD72
ENSGALT00000007311	NorthernBobwhite_ScaffoldedDeNovo_contig_1349	66482	CD74
ENSGALT00000040533	NorthernBobwhite_ScaffoldedDeNovo_contig_1349	66482	CD74
ENSGALT00000044165	NorthernBobwhite_ScaffoldedDeNovo_contig_59019	46	CD8
ENSGALT00000024957	NorthernBobwhite_ScaffoldedDeNovo_contig_10291	74823	CD80
ENSGALT00000010574	NorthernBobwhite_ScaffoldedDeNovo_contig_1553	12253	CD81
ENSGALT00000013052	NorthernBobwhite_ScaffoldedDeNovo_contig_12034	702	CD82
ENSGALT00000043149	NorthernBobwhite_ScaffoldedDeNovo_contig_306	15505	CD83
ENSGALT00000037176	NorthernBobwhite_ScaffoldedDeNovo_contig_26285	388	CD86
ENSGALT00000025557	NorthernBobwhite_ScaffoldedDeNovo_contig_59019	46	CD8A
ENSGALT00000025623	NorthernBobwhite_ScaffoldedDeNovo_contig_59019	46	CD8A
ENSGALT00000032019	NorthernBobwhite_ScaffoldedDeNovo_contig_7250	36369	CD8B
ENSGALT00000030043	NorthernBobwhite_ScaffoldedDeNovo_contig_13855	760	CD9
ENSGALT00000013613	NorthernBobwhite_ScaffoldedDeNovo_contig_461	12999	CD93
ENSGALT00000041401	NorthernBobwhite_ScaffoldedDeNovo_contig_8334	20195	CD99
ENSGALT00000014767	NorthernBobwhite_ScaffoldedDeNovo_contig_12671	51143	CD99L2
ENSGALT00000011937	NorthernBobwhite_ScaffoldedDeNovo_contig_81167	2	CDA
ENSGALT00000027467	NorthernBobwhite_ScaffoldedDeNovo_contig_2141	5005	CDADC1
ENSGALT00000008431	NorthernBobwhite_ScaffoldedDeNovo_contig_26781	3790	CDC14A
ENSGALT00000020613	NorthernBobwhite_ScaffoldedDeNovo_contig_13456	6262	CDC14B
ENSGALT00000044560	NorthernBobwhite_ScaffoldedDeNovo_contig_13456	6262	CDC14B
ENSGALT00000027148	NorthernBobwhite_ScaffoldedDeNovo_contig_14854	10631	CDC16
ENSGALT00000004876	NorthernBobwhite_ScaffoldedDeNovo_contig_5333	982	CDC2
ENSGALT00000043790	NorthernBobwhite_ScaffoldedDeNovo_contig_5333	982	CDC2
ENSGALT00000016208	NorthernBobwhite_ScaffoldedDeNovo_contig_27013	29790	CDC20
ENSGALT00000045019	NorthernBobwhite_ScaffoldedDeNovo_contig_6959	10860	CDC26
ENSGALT00000000832	NorthernBobwhite_ScaffoldedDeNovo_contig_23016	7663	CDC27
ENSGALT00000041135	NorthernBobwhite_ScaffoldedDeNovo_contig_1052	13245	CDC34
ENSGALT00000023330	NorthernBobwhite_ScaffoldedDeNovo_contig_9752	1154	CDC37L1
ENSGALT00000034897	NorthernBobwhite_ScaffoldedDeNovo_contig_1566	247	CDC42
ENSGALT00000014921	NorthernBobwhite_ScaffoldedDeNovo_contig_40941	564	CDC42BPA
ENSGALT00000039364	NorthernBobwhite_ScaffoldedDeNovo_contig_7415	41252	CDC42BPA
ENSGALT00000044673	NorthernBobwhite_ScaffoldedDeNovo_contig_3035	16201	CDC42EP1
ENSGALT00000017169	NorthernBobwhite_ScaffoldedDeNovo_contig_4826	36333	CDC42EP3
ENSGALT00000038499	NorthernBobwhite_ScaffoldedDeNovo_contig_3380	3599	CDC42EP4
ENSGALT00000042635	NorthernBobwhite_ScaffoldedDeNovo_contig_27207	9886	CDC42SE1
ENSGALT00000043843	NorthernBobwhite_ScaffoldedDeNovo_contig_27207	8869	CDC42SE1
ENSGALT00000043868	NorthernBobwhite_ScaffoldedDeNovo_contig_33126	7836	CDC42SE2
ENSGALT00000036694	NorthernBobwhite_ScaffoldedDeNovo_contig_21793	19966	CDC5L
ENSGALT00000043499	NorthernBobwhite_ScaffoldedDeNovo_contig_24655	4080	CDC6
ENSGALT00000009749	NorthernBobwhite_ScaffoldedDeNovo_contig_1610	28769	CDC7
ENSGALT00000003897	NorthernBobwhite_ScaffoldedDeNovo_contig_3043	135373	CDC73
ENSGALT00000000355	NorthernBobwhite_ScaffoldedDeNovo_contig_13085	44	CDCA2
ENSGALT00000023425	NorthernBobwhite_ScaffoldedDeNovo_contig_349	23047	CDCA3
ENSGALT00000019114	NorthernBobwhite_ScaffoldedDeNovo_contig_36596	9527	CDCA4
ENSGALT00000037877	NorthernBobwhite_ScaffoldedDeNovo_contig_18809	34356	CDCA7L
ENSGALT00000035687	NorthernBobwhite_ScaffoldedDeNovo_contig_7107	15323	CDCA8
ENSGALT00000034194	NorthernBobwhite_ScaffoldedDeNovo_contig_8357	4799	CDCA9
ENSGALT00000031134	NorthernBobwhite_ScaffoldedDeNovo_contig_1446	3025	CDCP1
ENSGALT00000017490	NorthernBobwhite_ScaffoldedDeNovo_contig_21418	20637	CDCP2
ENSGALT00000022388	NorthernBobwhite_ScaffoldedDeNovo_contig_10771	51408	CDD
ENSGALT00000006798	NorthernBobwhite_ScaffoldedDeNovo_contig_20314	29604	CDERMO1
ENSGALT00000021083	NorthernBobwhite_ScaffoldedDeNovo_contig_59156	18377	CDH10
ENSGALT00000021107	NorthernBobwhite_ScaffoldedDeNovo_contig_6625	24318	CDH12
ENSGALT00000008808	NorthernBobwhite_ScaffoldedDeNovo_contig_3847	86958	CDH13
ENSGALT00000025702	NorthernBobwhite_ScaffoldedDeNovo_contig_7050	19294	CDH17
ENSGALT00000022370	NorthernBobwhite_ScaffoldedDeNovo_contig_27264	4468	CDH19
ENSGALT00000036923	NorthernBobwhite_ScaffoldedDeNovo_contig_27264	4468	CDH19
ENSGALT00000024417	NorthernBobwhite_ScaffoldedDeNovo_contig_23771	18482	CDH2
ENSGALT00000021043	NorthernBobwhite_ScaffoldedDeNovo_contig_58456	410	CDH20
ENSGALT00000011670	NorthernBobwhite_ScaffoldedDeNovo_contig_2017	733	CDH22
ENSGALT00000000855	NorthernBobwhite_ScaffoldedDeNovo_contig_124886	249	CDH3
ENSGALT00000008180	NorthernBobwhite_ScaffoldedDeNovo_contig_4028	260549	CDH4
ENSGALT00000008459	NorthernBobwhite_ScaffoldedDeNovo_contig_2087	45700	CDH5
ENSGALT00000031019	NorthernBobwhite_ScaffoldedDeNovo_contig_10918	4374	CDH6
ENSGALT00000022381	NorthernBobwhite_ScaffoldedDeNovo_contig_12620	15970	CDH7
ENSGALT00000022382	NorthernBobwhite_ScaffoldedDeNovo_contig_2682	17207	CDH7
ENSGALT00000008525	NorthernBobwhite_ScaffoldedDeNovo_contig_39488	22725	CDH8
ENSGALT00000021079	NorthernBobwhite_ScaffoldedDeNovo_contig_55882	9603	CDH9
ENSGALT00000041171	NorthernBobwhite_ScaffoldedDeNovo_contig_1601	10715	CDHR1
ENSGALT00000005196	NorthernBobwhite_ScaffoldedDeNovo_contig_62334	10931	CDHR2
ENSGALT00000002657	NorthernBobwhite_ScaffoldedDeNovo_contig_18470	2364	CDK12
ENSGALT00000020125	NorthernBobwhite_ScaffoldedDeNovo_contig_20179	8033	CDK13
ENSGALT00000024270	NorthernBobwhite_ScaffoldedDeNovo_contig_65	37716	CDK19
ENSGALT00000044136	NorthernBobwhite_ScaffoldedDeNovo_contig_63853	5333	CDK2
ENSGALT00000045514	NorthernBobwhite_ScaffoldedDeNovo_contig_122147	217	CDK20
ENSGALT00000029434	NorthernBobwhite_ScaffoldedDeNovo_contig_883	58202	CDK3
ENSGALT00000044952	NorthernBobwhite_ScaffoldedDeNovo_contig_165830	1	CDK5R2
ENSGALT00000015428	NorthernBobwhite_ScaffoldedDeNovo_contig_13834	42228	CDK6
ENSGALT00000023876	NorthernBobwhite_ScaffoldedDeNovo_contig_4465	573	CDK7
ENSGALT00000027628	NorthernBobwhite_ScaffoldedDeNovo_contig_25472	8283	CDK8
ENSGALT00000008092	NorthernBobwhite_ScaffoldedDeNovo_contig_15107	25249	CDK9
ENSGALT00000020688	NorthernBobwhite_ScaffoldedDeNovo_contig_13208	17347	CDKAL1
ENSGALT00000020088	NorthernBobwhite_ScaffoldedDeNovo_contig_12527	20596	CDKL1
ENSGALT00000026675	NorthernBobwhite_ScaffoldedDeNovo_contig_8164	28254	CDKL5
ENSGALT00000037288	NorthernBobwhite_ScaffoldedDeNovo_contig_12183	24711	CDKN1B
ENSGALT00000044207	NorthernBobwhite_ScaffoldedDeNovo_contig_145269	85	CDKN2A
ENSGALT00000017152	NorthernBobwhite_ScaffoldedDeNovo_contig_1353	576	CDKN2C
ENSGALT00000003718	NorthernBobwhite_ScaffoldedDeNovo_contig_1237	115643	CDO1
ENSGALT00000046055	NorthernBobwhite_ScaffoldedDeNovo_contig_14860	13325	CDR2
ENSGALT00000045016	NorthernBobwhite_ScaffoldedDeNovo_contig_4889	19640	CDR2L
ENSGALT00000018315	NorthernBobwhite_ScaffoldedDeNovo_contig_12824	8561	CDS1
ENSGALT00000000221	NorthernBobwhite_ScaffoldedDeNovo_contig_15855	15986	CDS2
ENSGALT00000037615	NorthernBobwhite_ScaffoldedDeNovo_contig_10183	43374	CDV3
ENSGALT00000043833	NorthernBobwhite_ScaffoldedDeNovo_contig_20230	10493	CDX2
ENSGALT00000039481	NorthernBobwhite_ScaffoldedDeNovo_contig_13840	38647	CDX4
ENSGALT00000009108	NorthernBobwhite_ScaffoldedDeNovo_contig_1349	163624	CDX-A
ENSGALT00000012401	NorthernBobwhite_ScaffoldedDeNovo_contig_13840	22272	CDXB
ENSGALT00000020896	NorthernBobwhite_ScaffoldedDeNovo_contig_13920	24098	CDYL
ENSGALT00000021177	NorthernBobwhite_ScaffoldedDeNovo_contig_3853	15721	CDYL2
ENSGALT00000046059	NorthernBobwhite_ScaffoldedDeNovo_contig_9370	14276	CEBPA
ENSGALT00000013006	NorthernBobwhite_ScaffoldedDeNovo_contig_3697	277726	CEBPB
ENSGALT00000007771	NorthernBobwhite_ScaffoldedDeNovo_contig_7737	21970	CEBPG
ENSGALT00000037962	NorthernBobwhite_ScaffoldedDeNovo_contig_89045	378	CEBPZ
ENSGALT00000030546	NorthernBobwhite_ScaffoldedDeNovo_contig_9350	19553	CECR1
ENSGALT00000021278	NorthernBobwhite_ScaffoldedDeNovo_contig_13385	38384	CECR2
ENSGALT00000021270	NorthernBobwhite_ScaffoldedDeNovo_contig_9350	7523	CECR5
ENSGALT00000045832	NorthernBobwhite_ScaffoldedDeNovo_contig_12650	38647	CECR6
ENSGALT00000005497	NorthernBobwhite_ScaffoldedDeNovo_contig_14375	21530	CEL
ENSGALT00000007770	NorthernBobwhite_ScaffoldedDeNovo_contig_22392	735	CELA1
ENSGALT00000007270	NorthernBobwhite_ScaffoldedDeNovo_contig_3671	23521	CELA2A
ENSGALT00000013143	NorthernBobwhite_ScaffoldedDeNovo_contig_14412	22812	CELF1
ENSGALT00000010858	NorthernBobwhite_ScaffoldedDeNovo_contig_17039	5983	CELF2
ENSGALT00000010859	NorthernBobwhite_ScaffoldedDeNovo_contig_11514	147940	CELF2
ENSGALT00000043304	NorthernBobwhite_ScaffoldedDeNovo_contig_3857	62146	CELF3
ENSGALT00000003800	NorthernBobwhite_ScaffoldedDeNovo_contig_12774	25218	CELF4
ENSGALT00000040113	NorthernBobwhite_ScaffoldedDeNovo_contig_5837	12974	CELF6
ENSGALT00000044998	NorthernBobwhite_ScaffoldedDeNovo_contig_43260	13492	CELSR2
ENSGALT00000044703	NorthernBobwhite_ScaffoldedDeNovo_contig_543	6265	CENPA
ENSGALT00000019101	NorthernBobwhite_ScaffoldedDeNovo_contig_2136	20	CENPC1
ENSGALT00000037811	NorthernBobwhite_ScaffoldedDeNovo_contig_2136	20	CENPC1
ENSGALT00000032863	NorthernBobwhite_ScaffoldedDeNovo_contig_6646	124428	CENPH
ENSGALT00000027693	NorthernBobwhite_ScaffoldedDeNovo_contig_34954	5977	CENPJ
ENSGALT00000044590	NorthernBobwhite_ScaffoldedDeNovo_contig_12889	84115	CENPL
ENSGALT00000019440	NorthernBobwhite_ScaffoldedDeNovo_contig_110991	478	CENPM
ENSGALT00000039139	NorthernBobwhite_ScaffoldedDeNovo_contig_2452	13129	CENPN
ENSGALT00000026808	NorthernBobwhite_ScaffoldedDeNovo_contig_4468	35760	CENPO
ENSGALT00000007467	NorthernBobwhite_ScaffoldedDeNovo_contig_4668	49866	CENPP
ENSGALT00000036701	NorthernBobwhite_ScaffoldedDeNovo_contig_16974	29107	CENPQ
ENSGALT00000043964	NorthernBobwhite_ScaffoldedDeNovo_contig_94718	136	CENPT
ENSGALT00000007174	NorthernBobwhite_ScaffoldedDeNovo_contig_7384	82053	CENPV
ENSGALT00000045695	NorthernBobwhite_ScaffoldedDeNovo_contig_9096	9354	CENPW
ENSGALT00000044834	NorthernBobwhite_ScaffoldedDeNovo_contig_10327	70954	CENTRIN-1
ENSGALT00000012141	NorthernBobwhite_ScaffoldedDeNovo_contig_10215	28412	CENTRIN-2
ENSGALT00000017187	NorthernBobwhite_ScaffoldedDeNovo_contig_103	5366	CEP128
ENSGALT00000009049	NorthernBobwhite_ScaffoldedDeNovo_contig_3780	461	CEP152
ENSGALT00000011831	NorthernBobwhite_ScaffoldedDeNovo_contig_8119	19797	CEP164
ENSGALT00000017461	NorthernBobwhite_ScaffoldedDeNovo_contig_38509	8932	CEP170
ENSGALT00000010342	NorthernBobwhite_ScaffoldedDeNovo_contig_9316	32792	CEP19
ENSGALT00000002729	NorthernBobwhite_ScaffoldedDeNovo_contig_60613	886	CEP250
ENSGALT00000013152	NorthernBobwhite_ScaffoldedDeNovo_contig_3032	61037	CEP41
ENSGALT00000010724	NorthernBobwhite_ScaffoldedDeNovo_contig_4479	872	CEP55
ENSGALT00000027803	NorthernBobwhite_ScaffoldedDeNovo_contig_7475	2026	CEP57
ENSGALT00000024666	NorthernBobwhite_ScaffoldedDeNovo_contig_30207	3749	CEP57L1
ENSGALT00000014290	NorthernBobwhite_ScaffoldedDeNovo_contig_1370	13296	CEP68
ENSGALT00000022479	NorthernBobwhite_ScaffoldedDeNovo_contig_5406	11711	CEP76
ENSGALT00000000750	NorthernBobwhite_ScaffoldedDeNovo_contig_2700	43532	CEP85
ENSGALT00000024023	NorthernBobwhite_ScaffoldedDeNovo_contig_2449	7007	CEP85L
ENSGALT00000024760	NorthernBobwhite_ScaffoldedDeNovo_contig_3005	41725	CEP97
ENSGALT00000000195	NorthernBobwhite_ScaffoldedDeNovo_contig_16072	12360	CEPT1
ENSGALT00000043752	NorthernBobwhite_ScaffoldedDeNovo_contig_60613	886	CEPT250
ENSGALT00000008725	NorthernBobwhite_ScaffoldedDeNovo_contig_3056	391797	CER1
ENSGALT00000007990	NorthernBobwhite_ScaffoldedDeNovo_contig_5007	2980	CERCAM
ENSGALT00000030740	NorthernBobwhite_ScaffoldedDeNovo_contig_18250	1859	CERK
ENSGALT00000045967	NorthernBobwhite_ScaffoldedDeNovo_contig_18250	1859	CERK
ENSGALT00000014491	NorthernBobwhite_ScaffoldedDeNovo_contig_5028	15911	CERKL
ENSGALT00000005000	NorthernBobwhite_ScaffoldedDeNovo_contig_118716	536	CERS1
ENSGALT00000023574	NorthernBobwhite_ScaffoldedDeNovo_contig_4475	308022	CERS3
ENSGALT00000023609	NorthernBobwhite_ScaffoldedDeNovo_contig_13320	127723	CETN3
ENSGALT00000020607	NorthernBobwhite_ScaffoldedDeNovo_contig_31239	31500	CFC1
ENSGALT00000044292	NorthernBobwhite_ScaffoldedDeNovo_contig_1528	26481	CFD
ENSGALT00000019810	NorthernBobwhite_ScaffoldedDeNovo_contig_14115	25572	CFI
ENSGALT00000016285	NorthernBobwhite_ScaffoldedDeNovo_contig_486	10798	CFL2
ENSGALT00000013409	NorthernBobwhite_ScaffoldedDeNovo_contig_336	2234	CFLAR
ENSGALT00000014725	NorthernBobwhite_ScaffoldedDeNovo_contig_4817	46423	CFTII
ENSGALT00000015179	NorthernBobwhite_ScaffoldedDeNovo_contig_35840	2485	CFTR
ENSGALT00000015182	NorthernBobwhite_ScaffoldedDeNovo_contig_35840	2485	CFTR
ENSGALT00000037154	NorthernBobwhite_ScaffoldedDeNovo_contig_2529	90732	CGA
ENSGALT00000001354	NorthernBobwhite_ScaffoldedDeNovo_contig_3857	22356	CGN
ENSGALT00000006837	NorthernBobwhite_ScaffoldedDeNovo_contig_26131	3337	CGNL1
ENSGALT00000033784	NorthernBobwhite_ScaffoldedDeNovo_contig_22353	1232	CGNRH-R
ENSGALT00000019930	NorthernBobwhite_ScaffoldedDeNovo_contig_30673	4650	CGRRF1
ENSGALT00000010268	NorthernBobwhite_ScaffoldedDeNovo_contig_5258	73310	CH25H
ENSGALT00000045646	NorthernBobwhite_ScaffoldedDeNovo_contig_6282	16948	CHAC1
ENSGALT00000013322	NorthernBobwhite_ScaffoldedDeNovo_contig_18646	552	CHAC2
ENSGALT00000031388	NorthernBobwhite_ScaffoldedDeNovo_contig_50821	424	CHAD
ENSGALT00000019527	NorthernBobwhite_ScaffoldedDeNovo_contig_7263	17280	CHADL
ENSGALT00000001695	NorthernBobwhite_ScaffoldedDeNovo_contig_382	53782	CHAF1A
ENSGALT00000025844	NorthernBobwhite_ScaffoldedDeNovo_contig_17397	382	CHAF1B
ENSGALT00000020598	NorthernBobwhite_ScaffoldedDeNovo_contig_118235	24	CHALK5
ENSGALT00000027144	NorthernBobwhite_ScaffoldedDeNovo_contig_14854	46446	CHAMP1
ENSGALT00000014842	NorthernBobwhite_ScaffoldedDeNovo_contig_99734	96	CHAT2
ENSGALT00000008343	NorthernBobwhite_ScaffoldedDeNovo_contig_8208	30921	CHB1
ENSGALT00000045389	NorthernBobwhite_ScaffoldedDeNovo_contig_11244	51292	CHCHD1
ENSGALT00000045756	NorthernBobwhite_ScaffoldedDeNovo_contig_112	9856	CHCHD10
ENSGALT00000003929	NorthernBobwhite_ScaffoldedDeNovo_contig_6286	929	CHCHD2
ENSGALT00000010489	NorthernBobwhite_ScaffoldedDeNovo_contig_16783	58763	CHCHD3
ENSGALT00000010231	NorthernBobwhite_ScaffoldedDeNovo_contig_33900	13766	CHCHD4
ENSGALT00000009765	NorthernBobwhite_ScaffoldedDeNovo_contig_5052	48382	CHCHD6
ENSGALT00000011260	NorthernBobwhite_ScaffoldedDeNovo_contig_8895	53153	CHD2
ENSGALT00000005902	NorthernBobwhite_ScaffoldedDeNovo_contig_747	989	CHD9
ENSGALT00000008609	NorthernBobwhite_ScaffoldedDeNovo_contig_25315	505	CHDH
ENSGALT00000023601	NorthernBobwhite_ScaffoldedDeNovo_contig_13287	25845	CHDZ
ENSGALT00000024661	NorthernBobwhite_ScaffoldedDeNovo_contig_13287	25845	CHDZ
ENSGALT00000006060	NorthernBobwhite_ScaffoldedDeNovo_contig_46786	4	CHERP
ENSGALT00000003414	NorthernBobwhite_ScaffoldedDeNovo_contig_2314	93352	CHFR
ENSGALT00000014913	NorthernBobwhite_ScaffoldedDeNovo_contig_2298	21366	CHGB
ENSGALT00000005564	NorthernBobwhite_ScaffoldedDeNovo_contig_10811	3084	CHIA
ENSGALT00000005566	NorthernBobwhite_ScaffoldedDeNovo_contig_10811	3084	CHIA
ENSGALT00000012409	NorthernBobwhite_ScaffoldedDeNovo_contig_4353	1	CHIC1
ENSGALT00000022578	NorthernBobwhite_ScaffoldedDeNovo_contig_10815	75653	CHIC2
ENSGALT00000011039	NorthernBobwhite_ScaffoldedDeNovo_contig_37983	6605	CHID1
ENSGALT00000035506	NorthernBobwhite_ScaffoldedDeNovo_contig_80953	148	CHIR-A2
ENSGALT00000035902	NorthernBobwhite_ScaffoldedDeNovo_contig_51040	2	CHIR-AB1
ENSGALT00000044530	NorthernBobwhite_ScaffoldedDeNovo_contig_80953	157	CHIR-B5
ENSGALT00000011211	NorthernBobwhite_ScaffoldedDeNovo_contig_17802	3955	CHKA
ENSGALT00000011184	NorthernBobwhite_ScaffoldedDeNovo_contig_14475	13511	CHML
ENSGALT00000033674	NorthernBobwhite_ScaffoldedDeNovo_contig_21941	9642	CHMP1A
ENSGALT00000006500	NorthernBobwhite_ScaffoldedDeNovo_contig_16515	2396	CHMP1B
ENSGALT00000029274	NorthernBobwhite_ScaffoldedDeNovo_contig_24767	1520	CHMP2A
ENSGALT00000024990	NorthernBobwhite_ScaffoldedDeNovo_contig_47855	70	CHMP2B
ENSGALT00000003268	NorthernBobwhite_ScaffoldedDeNovo_contig_21101	4398	CHMP4B
ENSGALT00000021491	NorthernBobwhite_ScaffoldedDeNovo_contig_10847	1150	CHMP5
ENSGALT00000044736	NorthernBobwhite_ScaffoldedDeNovo_contig_22895	14072	CHMP6
ENSGALT00000000557	NorthernBobwhite_ScaffoldedDeNovo_contig_21031	3748	CHMP7
ENSGALT00000015119	NorthernBobwhite_ScaffoldedDeNovo_contig_21189	4192	CHN1
ENSGALT00000042646	NorthernBobwhite_ScaffoldedDeNovo_contig_21189	4192	CHN1
ENSGALT00000018199	NorthernBobwhite_ScaffoldedDeNovo_contig_9858	6589	CHN2
ENSGALT00000009013	NorthernBobwhite_ScaffoldedDeNovo_contig_757	83520	CHNTHL1
ENSGALT00000011012	NorthernBobwhite_ScaffoldedDeNovo_contig_3134	12291	CHOBF-1
ENSGALT00000024563	NorthernBobwhite_ScaffoldedDeNovo_contig_16600	7147	CHOLINE/ETHANOLAMINE PHOSPHOTRANSFERASE
ENSGALT00000024584	NorthernBobwhite_ScaffoldedDeNovo_contig_20581	24309	CHORIDE CHANNEL, VOLTAGE GATED
ENSGALT00000032642	NorthernBobwhite_ScaffoldedDeNovo_contig_43624	2468	CHP1
ENSGALT00000021800	NorthernBobwhite_ScaffoldedDeNovo_contig_4517	4042	CHPF2
ENSGALT00000020835	NorthernBobwhite_ScaffoldedDeNovo_contig_16692	31403	CHPT1
ENSGALT00000044029	NorthernBobwhite_ScaffoldedDeNovo_contig_24395	457	CHRAC1
ENSGALT00000013105	NorthernBobwhite_ScaffoldedDeNovo_contig_22210	261	CHRDL1
ENSGALT00000027968	NorthernBobwhite_ScaffoldedDeNovo_contig_4447	30989	CHRDL2
ENSGALT00000021029	NorthernBobwhite_ScaffoldedDeNovo_contig_6396	21084	CHRM2
ENSGALT00000017530	NorthernBobwhite_ScaffoldedDeNovo_contig_57719	3176	CHRM3
ENSGALT00000013620	NorthernBobwhite_ScaffoldedDeNovo_contig_8733	49813	CHRM4
ENSGALT00000015701	NorthernBobwhite_ScaffoldedDeNovo_contig_8840	15768	CHRM5
ENSGALT00000015138	NorthernBobwhite_ScaffoldedDeNovo_contig_7916	84636	CHRNA1
ENSGALT00000022103	NorthernBobwhite_ScaffoldedDeNovo_contig_92944	66	CHRNA10
ENSGALT00000026738	NorthernBobwhite_ScaffoldedDeNovo_contig_18609	33088	CHRNA2
ENSGALT00000004759	NorthernBobwhite_ScaffoldedDeNovo_contig_12340	13281	CHRNA3
ENSGALT00000034654	NorthernBobwhite_ScaffoldedDeNovo_contig_12340	13281	CHRNA3
ENSGALT00000009316	NorthernBobwhite_ScaffoldedDeNovo_contig_5496	500	CHRNA4
ENSGALT00000004776	NorthernBobwhite_ScaffoldedDeNovo_contig_12340	7935	CHRNA5
ENSGALT00000037792	NorthernBobwhite_ScaffoldedDeNovo_contig_28868	12961	CHRNA6
ENSGALT00000006519	NorthernBobwhite_ScaffoldedDeNovo_contig_39787	1459	CHRNA7
ENSGALT00000023080	NorthernBobwhite_ScaffoldedDeNovo_contig_36107	11946	CHRNA9
ENSGALT00000004270	NorthernBobwhite_ScaffoldedDeNovo_contig_24896	12824	CHRNB2
ENSGALT00000024820	NorthernBobwhite_ScaffoldedDeNovo_contig_28868	1242	CHRNB3
ENSGALT00000039804	NorthernBobwhite_ScaffoldedDeNovo_contig_9687	834	CHRNB4
ENSGALT00000012824	NorthernBobwhite_ScaffoldedDeNovo_contig_5728	16968	CHRND
ENSGALT00000012833	NorthernBobwhite_ScaffoldedDeNovo_contig_5728	21192	CHRNG
ENSGALT00000045440	NorthernBobwhite_ScaffoldedDeNovo_contig_10482	1	CHROMODOMAIN HELICASE DNA BINDING ATP DEPENDENT HELICASE
ENSGALT00000027671	NorthernBobwhite_ScaffoldedDeNovo_contig_30575	840	CHSAP18
ENSGALT00000013750	NorthernBobwhite_ScaffoldedDeNovo_contig_5820	84058	CHST1
ENSGALT00000027075	NorthernBobwhite_ScaffoldedDeNovo_contig_2340	63986	CHST10
ENSGALT00000042925	NorthernBobwhite_ScaffoldedDeNovo_contig_6685	21297	CHST11
ENSGALT00000006800	NorthernBobwhite_ScaffoldedDeNovo_contig_7241	67642	CHST12
ENSGALT00000010014	NorthernBobwhite_ScaffoldedDeNovo_contig_15815	821	CHST13
ENSGALT00000015798	NorthernBobwhite_ScaffoldedDeNovo_contig_23325	77729	CHST15
ENSGALT00000040590	NorthernBobwhite_ScaffoldedDeNovo_contig_4577	43156	CHST3
ENSGALT00000001323	NorthernBobwhite_ScaffoldedDeNovo_contig_4779	44968	CHST4
ENSGALT00000001342	NorthernBobwhite_ScaffoldedDeNovo_contig_29330	4628	CHST6
ENSGALT00000007842	NorthernBobwhite_ScaffoldedDeNovo_contig_18594	78385	CHST8
ENSGALT00000030920	NorthernBobwhite_ScaffoldedDeNovo_contig_53395	5744	CHST9
ENSGALT00000045614	NorthernBobwhite_ScaffoldedDeNovo_contig_4475	23377	CHSY1
ENSGALT00000045017	NorthernBobwhite_ScaffoldedDeNovo_contig_13566	128987	CHSY3
ENSGALT00000000898	NorthernBobwhite_ScaffoldedDeNovo_contig_22497	15737	CHTF8
ENSGALT00000040053	NorthernBobwhite_ScaffoldedDeNovo_contig_16272	9415	CHTL1A
ENSGALT00000021244	NorthernBobwhite_ScaffoldedDeNovo_contig_6919	113992	CHUNK-1
ENSGALT00000046230	NorthernBobwhite_ScaffoldedDeNovo_contig_10735	430	CHURC1
ENSGALT00000043629	NorthernBobwhite_ScaffoldedDeNovo_contig_24907	416	CIAO1
ENSGALT00000001810	NorthernBobwhite_ScaffoldedDeNovo_contig_6402	24525	CIAPIN1
ENSGALT00000013516	NorthernBobwhite_ScaffoldedDeNovo_contig_25868	5842	CIB1
ENSGALT00000034980	NorthernBobwhite_ScaffoldedDeNovo_contig_39691	3156	CIB3
ENSGALT00000045171	NorthernBobwhite_ScaffoldedDeNovo_contig_565	8716	CIDEA
ENSGALT00000045824	NorthernBobwhite_ScaffoldedDeNovo_contig_53662	1	CIDEC
ENSGALT00000011613	NorthernBobwhite_ScaffoldedDeNovo_contig_17452	1600	CIITA
ENSGALT00000011900	NorthernBobwhite_ScaffoldedDeNovo_contig_3010	10156	CILP
ENSGALT00000045035	NorthernBobwhite_ScaffoldedDeNovo_contig_4683	14852	CILP2
ENSGALT00000018551	NorthernBobwhite_ScaffoldedDeNovo_contig_190576	1	CINP
ENSGALT00000044994	NorthernBobwhite_ScaffoldedDeNovo_contig_1119	16431	CIP1
ENSGALT00000023090	NorthernBobwhite_ScaffoldedDeNovo_contig_112221	506	CIR1
ENSGALT00000019966	NorthernBobwhite_ScaffoldedDeNovo_contig_41973	8880	CIRBP
ENSGALT00000045607	NorthernBobwhite_ScaffoldedDeNovo_contig_41973	8359	CIRBP
ENSGALT00000000910	NorthernBobwhite_ScaffoldedDeNovo_contig_165622	166	CIRH1A
ENSGALT00000004265	NorthernBobwhite_ScaffoldedDeNovo_contig_1652	12898	CISD1
ENSGALT00000045575	NorthernBobwhite_ScaffoldedDeNovo_contig_2012	10661	CISD2
ENSGALT00000045223	NorthernBobwhite_ScaffoldedDeNovo_contig_197451	148	CISD3
ENSGALT00000003543	NorthernBobwhite_ScaffoldedDeNovo_contig_13936	10412	CISH
ENSGALT00000022425	NorthernBobwhite_ScaffoldedDeNovo_contig_40829	4	CITED2
ENSGALT00000027509	NorthernBobwhite_ScaffoldedDeNovo_contig_43429	1	CKAP2
ENSGALT00000020663	NorthernBobwhite_ScaffoldedDeNovo_contig_8455	4485	CKAP4
ENSGALT00000013551	NorthernBobwhite_ScaffoldedDeNovo_contig_13491	20109	CKAP5
ENSGALT00000018765	NorthernBobwhite_ScaffoldedDeNovo_contig_6873	6003	CKB
ENSGALT00000029706	NorthernBobwhite_ScaffoldedDeNovo_contig_2026	11594	CKI
ENSGALT00000020012	NorthernBobwhite_ScaffoldedDeNovo_contig_11301	25058	CKIR2.3
ENSGALT00000008438	NorthernBobwhite_ScaffoldedDeNovo_contig_58780	17	CKLF
ENSGALT00000013600	NorthernBobwhite_ScaffoldedDeNovo_contig_6809	89026	CKMT1A
ENSGALT00000032786	NorthernBobwhite_ScaffoldedDeNovo_contig_2589	78816	CKMT2
ENSGALT00000043587	NorthernBobwhite_ScaffoldedDeNovo_contig_41444	419	CKR1 PROTEIN (LOC396247)
ENSGALT00000045513	NorthernBobwhite_ScaffoldedDeNovo_contig_170719	160	CKS1B
[truncated: 10,292 more rows]
