# Supplementary material for: A Draft De Novo Genome Assembly for the Northern Bobwhite (Colinus virginianus) Reveals Evidence for a Rapid Decline in Effective Population Size Beginning in the Late Pleistocene
Source: PLoS One. 2014 Mar 12;9(3):e90240. doi: 10.1371/journal.pone.0090240 (PMC3951200; doi:10.1371/journal.pone.0090240)
Supplement: Table S8 — Galgal 4.71 ab initio (GENSCAN) Transcript Mappings to NB1.1. (XLSX) [file pone.0090240.s008.xlsx]

## Sheet: Galgal4.71GENSCAN_NB1.1_TableS8
Table S8 Galgal 4.71 ab initio (GENSCAN) transcript mappings to NB1.1-Quick Reference
Galgal 4.71 GENSCAN ID	NB1.1 contig ID	GENSCAN Transcript Start Position in NB1.1
GENSCAN00000015313	NorthernBobwhite_ScaffoldedDeNovo_contig_6	35005
GENSCAN00000015286	NorthernBobwhite_ScaffoldedDeNovo_contig_6	41793
GENSCAN00000015288	NorthernBobwhite_ScaffoldedDeNovo_contig_6	60100
GENSCAN00000015292	NorthernBobwhite_ScaffoldedDeNovo_contig_6	105118
GENSCAN00000009486	NorthernBobwhite_ScaffoldedDeNovo_contig_8	7164
GENSCAN00000009482	NorthernBobwhite_ScaffoldedDeNovo_contig_8	55913
GENSCAN00000035522	NorthernBobwhite_ScaffoldedDeNovo_contig_10	26171
GENSCAN00000026880	NorthernBobwhite_ScaffoldedDeNovo_contig_11	5469
GENSCAN00000026888	NorthernBobwhite_ScaffoldedDeNovo_contig_11	25166
GENSCAN00000026891	NorthernBobwhite_ScaffoldedDeNovo_contig_11	28999
GENSCAN00000026879	NorthernBobwhite_ScaffoldedDeNovo_contig_11	64244
GENSCAN00000038999	NorthernBobwhite_ScaffoldedDeNovo_contig_12	35354
GENSCAN00000008068	NorthernBobwhite_ScaffoldedDeNovo_contig_13	65
GENSCAN00000008134	NorthernBobwhite_ScaffoldedDeNovo_contig_13	11777
GENSCAN00000008142	NorthernBobwhite_ScaffoldedDeNovo_contig_13	51914
GENSCAN00000008136	NorthernBobwhite_ScaffoldedDeNovo_contig_13	53025
GENSCAN00000027410	NorthernBobwhite_ScaffoldedDeNovo_contig_14	17155
GENSCAN00000031915	NorthernBobwhite_ScaffoldedDeNovo_contig_16	1390
GENSCAN00000031930	NorthernBobwhite_ScaffoldedDeNovo_contig_16	5955
GENSCAN00000010977	NorthernBobwhite_ScaffoldedDeNovo_contig_17	45442
GENSCAN00000006871	NorthernBobwhite_ScaffoldedDeNovo_contig_18	6876
GENSCAN00000006867	NorthernBobwhite_ScaffoldedDeNovo_contig_18	25095
GENSCAN00000006855	NorthernBobwhite_ScaffoldedDeNovo_contig_18	50155
GENSCAN00000006857	NorthernBobwhite_ScaffoldedDeNovo_contig_18	76826
GENSCAN00000017508	NorthernBobwhite_ScaffoldedDeNovo_contig_18	99215
GENSCAN00000017530	NorthernBobwhite_ScaffoldedDeNovo_contig_18	118675
GENSCAN00000010822	NorthernBobwhite_ScaffoldedDeNovo_contig_20	25786
GENSCAN00000026458	NorthernBobwhite_ScaffoldedDeNovo_contig_22	5673
GENSCAN00000020664	NorthernBobwhite_ScaffoldedDeNovo_contig_23	96052
GENSCAN00000012221	NorthernBobwhite_ScaffoldedDeNovo_contig_25	32661
GENSCAN00000015602	NorthernBobwhite_ScaffoldedDeNovo_contig_26	4910
GENSCAN00000015620	NorthernBobwhite_ScaffoldedDeNovo_contig_26	23758
GENSCAN00000017568	NorthernBobwhite_ScaffoldedDeNovo_contig_26	29305
GENSCAN00000015605	NorthernBobwhite_ScaffoldedDeNovo_contig_26	37199
GENSCAN00000002008	NorthernBobwhite_ScaffoldedDeNovo_contig_29	17213
GENSCAN00000002014	NorthernBobwhite_ScaffoldedDeNovo_contig_29	22365
GENSCAN00000033362	NorthernBobwhite_ScaffoldedDeNovo_contig_30	51448
GENSCAN00000033360	NorthernBobwhite_ScaffoldedDeNovo_contig_30	104855
GENSCAN00000033354	NorthernBobwhite_ScaffoldedDeNovo_contig_30	133140
GENSCAN00000033321	NorthernBobwhite_ScaffoldedDeNovo_contig_30	166630
GENSCAN00000033326	NorthernBobwhite_ScaffoldedDeNovo_contig_30	356473
GENSCAN00000033313	NorthernBobwhite_ScaffoldedDeNovo_contig_30	382344
GENSCAN00000011351	NorthernBobwhite_ScaffoldedDeNovo_contig_30	404933
GENSCAN00000033314	NorthernBobwhite_ScaffoldedDeNovo_contig_30	416307
GENSCAN00000033379	NorthernBobwhite_ScaffoldedDeNovo_contig_30	442093
GENSCAN00000040282	NorthernBobwhite_ScaffoldedDeNovo_contig_31	889
GENSCAN00000013777	NorthernBobwhite_ScaffoldedDeNovo_contig_33	12748
GENSCAN00000038969	NorthernBobwhite_ScaffoldedDeNovo_contig_35	9910
GENSCAN00000038932	NorthernBobwhite_ScaffoldedDeNovo_contig_35	20205
GENSCAN00000038931	NorthernBobwhite_ScaffoldedDeNovo_contig_35	43199
GENSCAN00000038953	NorthernBobwhite_ScaffoldedDeNovo_contig_35	61565
GENSCAN00000038944	NorthernBobwhite_ScaffoldedDeNovo_contig_35	74185
GENSCAN00000038955	NorthernBobwhite_ScaffoldedDeNovo_contig_35	141945
GENSCAN00000038938	NorthernBobwhite_ScaffoldedDeNovo_contig_35	159956
GENSCAN00000020650	NorthernBobwhite_ScaffoldedDeNovo_contig_39	3014
GENSCAN00000020633	NorthernBobwhite_ScaffoldedDeNovo_contig_39	43570
GENSCAN00000020632	NorthernBobwhite_ScaffoldedDeNovo_contig_39	121804
GENSCAN00000019216	NorthernBobwhite_ScaffoldedDeNovo_contig_45	3341
GENSCAN00000019199	NorthernBobwhite_ScaffoldedDeNovo_contig_45	114591
GENSCAN00000019215	NorthernBobwhite_ScaffoldedDeNovo_contig_45	151689
GENSCAN00000019221	NorthernBobwhite_ScaffoldedDeNovo_contig_45	239399
GENSCAN00000019197	NorthernBobwhite_ScaffoldedDeNovo_contig_45	399529
GENSCAN00000027963	NorthernBobwhite_ScaffoldedDeNovo_contig_45	411088
GENSCAN00000019210	NorthernBobwhite_ScaffoldedDeNovo_contig_45	435209
GENSCAN00000019200	NorthernBobwhite_ScaffoldedDeNovo_contig_45	486054
GENSCAN00000019201	NorthernBobwhite_ScaffoldedDeNovo_contig_45	533552
GENSCAN00000019209	NorthernBobwhite_ScaffoldedDeNovo_contig_45	538777
GENSCAN00000000489	NorthernBobwhite_ScaffoldedDeNovo_contig_46	46543
GENSCAN00000014042	NorthernBobwhite_ScaffoldedDeNovo_contig_47	1555
GENSCAN00000014055	NorthernBobwhite_ScaffoldedDeNovo_contig_47	6733
GENSCAN00000008914	NorthernBobwhite_ScaffoldedDeNovo_contig_48	20776
GENSCAN00000008916	NorthernBobwhite_ScaffoldedDeNovo_contig_48	28681
GENSCAN00000017116	NorthernBobwhite_ScaffoldedDeNovo_contig_52	19977
GENSCAN00000017129	NorthernBobwhite_ScaffoldedDeNovo_contig_52	43848
GENSCAN00000017125	NorthernBobwhite_ScaffoldedDeNovo_contig_52	60776
GENSCAN00000017117	NorthernBobwhite_ScaffoldedDeNovo_contig_52	69368
GENSCAN00000017108	NorthernBobwhite_ScaffoldedDeNovo_contig_52	89919
GENSCAN00000009448	NorthernBobwhite_ScaffoldedDeNovo_contig_53	41537
GENSCAN00000011436	NorthernBobwhite_ScaffoldedDeNovo_contig_57	187
GENSCAN00000011443	NorthernBobwhite_ScaffoldedDeNovo_contig_58	6325
GENSCAN00000028647	NorthernBobwhite_ScaffoldedDeNovo_contig_60	8123
GENSCAN00000028660	NorthernBobwhite_ScaffoldedDeNovo_contig_60	13122
GENSCAN00000028656	NorthernBobwhite_ScaffoldedDeNovo_contig_60	15077
GENSCAN00000028640	NorthernBobwhite_ScaffoldedDeNovo_contig_60	36565
GENSCAN00000021686	NorthernBobwhite_ScaffoldedDeNovo_contig_61	13029
GENSCAN00000021695	NorthernBobwhite_ScaffoldedDeNovo_contig_61	16439
GENSCAN00000021682	NorthernBobwhite_ScaffoldedDeNovo_contig_61	43429
GENSCAN00000021697	NorthernBobwhite_ScaffoldedDeNovo_contig_61	93495
GENSCAN00000021700	NorthernBobwhite_ScaffoldedDeNovo_contig_61	144322
GENSCAN00000021677	NorthernBobwhite_ScaffoldedDeNovo_contig_61	160006
GENSCAN00000027998	NorthernBobwhite_ScaffoldedDeNovo_contig_62	1830
GENSCAN00000027994	NorthernBobwhite_ScaffoldedDeNovo_contig_62	13646
GENSCAN00000036328	NorthernBobwhite_ScaffoldedDeNovo_contig_65	12972
GENSCAN00000036308	NorthernBobwhite_ScaffoldedDeNovo_contig_65	37965
GENSCAN00000036310	NorthernBobwhite_ScaffoldedDeNovo_contig_65	50851
GENSCAN00000016775	NorthernBobwhite_ScaffoldedDeNovo_contig_68	8713
GENSCAN00000016774	NorthernBobwhite_ScaffoldedDeNovo_contig_68	40354
GENSCAN00000006540	NorthernBobwhite_ScaffoldedDeNovo_contig_70	41156
GENSCAN00000011789	NorthernBobwhite_ScaffoldedDeNovo_contig_71	76768
GENSCAN00000011793	NorthernBobwhite_ScaffoldedDeNovo_contig_71	97952
GENSCAN00000011794	NorthernBobwhite_ScaffoldedDeNovo_contig_71	186914
GENSCAN00000011788	NorthernBobwhite_ScaffoldedDeNovo_contig_71	193300
GENSCAN00000004715	NorthernBobwhite_ScaffoldedDeNovo_contig_74	5409
GENSCAN00000026883	NorthernBobwhite_ScaffoldedDeNovo_contig_75	2885
GENSCAN00000026873	NorthernBobwhite_ScaffoldedDeNovo_contig_75	9900
GENSCAN00000014786	NorthernBobwhite_ScaffoldedDeNovo_contig_78	2307
GENSCAN00000031579	NorthernBobwhite_ScaffoldedDeNovo_contig_79	18733
GENSCAN00000014413	NorthernBobwhite_ScaffoldedDeNovo_contig_79	46884
GENSCAN00000010700	NorthernBobwhite_ScaffoldedDeNovo_contig_80	14424
GENSCAN00000010721	NorthernBobwhite_ScaffoldedDeNovo_contig_80	17409
GENSCAN00000010723	NorthernBobwhite_ScaffoldedDeNovo_contig_80	38234
GENSCAN00000034637	NorthernBobwhite_ScaffoldedDeNovo_contig_81	16426
GENSCAN00000011556	NorthernBobwhite_ScaffoldedDeNovo_contig_82	176234
GENSCAN00000011560	NorthernBobwhite_ScaffoldedDeNovo_contig_82	280351
GENSCAN00000017714	NorthernBobwhite_ScaffoldedDeNovo_contig_83	38
GENSCAN00000005666	NorthernBobwhite_ScaffoldedDeNovo_contig_83	4744
GENSCAN00000017700	NorthernBobwhite_ScaffoldedDeNovo_contig_83	20277
GENSCAN00000017711	NorthernBobwhite_ScaffoldedDeNovo_contig_83	41315
GENSCAN00000017720	NorthernBobwhite_ScaffoldedDeNovo_contig_83	60802
GENSCAN00000017725	NorthernBobwhite_ScaffoldedDeNovo_contig_83	66827
GENSCAN00000005441	NorthernBobwhite_ScaffoldedDeNovo_contig_84	4482
GENSCAN00000024088	NorthernBobwhite_ScaffoldedDeNovo_contig_84	7308
GENSCAN00000017071	NorthernBobwhite_ScaffoldedDeNovo_contig_87	2555
GENSCAN00000039739	NorthernBobwhite_ScaffoldedDeNovo_contig_88	1101
GENSCAN00000039744	NorthernBobwhite_ScaffoldedDeNovo_contig_88	20160
GENSCAN00000027200	NorthernBobwhite_ScaffoldedDeNovo_contig_89	745
GENSCAN00000027183	NorthernBobwhite_ScaffoldedDeNovo_contig_89	8543
GENSCAN00000019702	NorthernBobwhite_ScaffoldedDeNovo_contig_90	61816
GENSCAN00000019705	NorthernBobwhite_ScaffoldedDeNovo_contig_90	74378
GENSCAN00000019701	NorthernBobwhite_ScaffoldedDeNovo_contig_90	160651
GENSCAN00000024541	NorthernBobwhite_ScaffoldedDeNovo_contig_91	42719
GENSCAN00000003493	NorthernBobwhite_ScaffoldedDeNovo_contig_93	5889
GENSCAN00000003486	NorthernBobwhite_ScaffoldedDeNovo_contig_93	22911
GENSCAN00000003473	NorthernBobwhite_ScaffoldedDeNovo_contig_93	43061
GENSCAN00000000368	NorthernBobwhite_ScaffoldedDeNovo_contig_93	113816
GENSCAN00000000366	NorthernBobwhite_ScaffoldedDeNovo_contig_93	118427
GENSCAN00000000392	NorthernBobwhite_ScaffoldedDeNovo_contig_93	149794
GENSCAN00000016159	NorthernBobwhite_ScaffoldedDeNovo_contig_94	14790
GENSCAN00000000688	NorthernBobwhite_ScaffoldedDeNovo_contig_94	58139
GENSCAN00000029519	NorthernBobwhite_ScaffoldedDeNovo_contig_94	58139
GENSCAN00000018135	NorthernBobwhite_ScaffoldedDeNovo_contig_94	58139
GENSCAN00000006227	NorthernBobwhite_ScaffoldedDeNovo_contig_94	61214
GENSCAN00000000690	NorthernBobwhite_ScaffoldedDeNovo_contig_94	81342
GENSCAN00000010612	NorthernBobwhite_ScaffoldedDeNovo_contig_94	81780
GENSCAN00000010619	NorthernBobwhite_ScaffoldedDeNovo_contig_94	86688
GENSCAN00000010622	NorthernBobwhite_ScaffoldedDeNovo_contig_94	90687
GENSCAN00000036724	NorthernBobwhite_ScaffoldedDeNovo_contig_94	94007
GENSCAN00000035863	NorthernBobwhite_ScaffoldedDeNovo_contig_99	3387
GENSCAN00000035852	NorthernBobwhite_ScaffoldedDeNovo_contig_99	33043
GENSCAN00000035845	NorthernBobwhite_ScaffoldedDeNovo_contig_99	34739
GENSCAN00000035873	NorthernBobwhite_ScaffoldedDeNovo_contig_99	53212
GENSCAN00000035875	NorthernBobwhite_ScaffoldedDeNovo_contig_99	57299
GENSCAN00000033002	NorthernBobwhite_ScaffoldedDeNovo_contig_100	3648
GENSCAN00000014692	NorthernBobwhite_ScaffoldedDeNovo_contig_100	24479
GENSCAN00000014731	NorthernBobwhite_ScaffoldedDeNovo_contig_100	56013
GENSCAN00000001352	NorthernBobwhite_ScaffoldedDeNovo_contig_101	51740
GENSCAN00000001331	NorthernBobwhite_ScaffoldedDeNovo_contig_101	68561
GENSCAN00000026767	NorthernBobwhite_ScaffoldedDeNovo_contig_103	5363
GENSCAN00000007479	NorthernBobwhite_ScaffoldedDeNovo_contig_104	2774
GENSCAN00000007456	NorthernBobwhite_ScaffoldedDeNovo_contig_104	34013
GENSCAN00000007486	NorthernBobwhite_ScaffoldedDeNovo_contig_104	52971
GENSCAN00000007483	NorthernBobwhite_ScaffoldedDeNovo_contig_104	87611
GENSCAN00000038119	NorthernBobwhite_ScaffoldedDeNovo_contig_109	6624
GENSCAN00000038140	NorthernBobwhite_ScaffoldedDeNovo_contig_109	76550
GENSCAN00000038144	NorthernBobwhite_ScaffoldedDeNovo_contig_109	80333
GENSCAN00000038141	NorthernBobwhite_ScaffoldedDeNovo_contig_109	86769
GENSCAN00000026268	NorthernBobwhite_ScaffoldedDeNovo_contig_110	3697
GENSCAN00000021809	NorthernBobwhite_ScaffoldedDeNovo_contig_112	1903
GENSCAN00000021789	NorthernBobwhite_ScaffoldedDeNovo_contig_112	3893
GENSCAN00000021812	NorthernBobwhite_ScaffoldedDeNovo_contig_112	50499
GENSCAN00000021777	NorthernBobwhite_ScaffoldedDeNovo_contig_112	88617
GENSCAN00000008754	NorthernBobwhite_ScaffoldedDeNovo_contig_114	28443
GENSCAN00000014240	NorthernBobwhite_ScaffoldedDeNovo_contig_115	8475
GENSCAN00000014245	NorthernBobwhite_ScaffoldedDeNovo_contig_115	38886
GENSCAN00000014238	NorthernBobwhite_ScaffoldedDeNovo_contig_115	86737
GENSCAN00000014247	NorthernBobwhite_ScaffoldedDeNovo_contig_115	113197
GENSCAN00000014170	NorthernBobwhite_ScaffoldedDeNovo_contig_118	4235
GENSCAN00000007821	NorthernBobwhite_ScaffoldedDeNovo_contig_119	5397
GENSCAN00000023328	NorthernBobwhite_ScaffoldedDeNovo_contig_120	12691
GENSCAN00000023325	NorthernBobwhite_ScaffoldedDeNovo_contig_120	45257
GENSCAN00000021221	NorthernBobwhite_ScaffoldedDeNovo_contig_120	61026
GENSCAN00000021219	NorthernBobwhite_ScaffoldedDeNovo_contig_120	69673
GENSCAN00000021234	NorthernBobwhite_ScaffoldedDeNovo_contig_120	85826
GENSCAN00000010813	NorthernBobwhite_ScaffoldedDeNovo_contig_123	12930
GENSCAN00000033507	NorthernBobwhite_ScaffoldedDeNovo_contig_124	7703
GENSCAN00000033501	NorthernBobwhite_ScaffoldedDeNovo_contig_124	24514
GENSCAN00000033478	NorthernBobwhite_ScaffoldedDeNovo_contig_124	37670
GENSCAN00000033506	NorthernBobwhite_ScaffoldedDeNovo_contig_124	71941
GENSCAN00000038699	NorthernBobwhite_ScaffoldedDeNovo_contig_124	112404
GENSCAN00000033467	NorthernBobwhite_ScaffoldedDeNovo_contig_124	120417
GENSCAN00000015900	NorthernBobwhite_ScaffoldedDeNovo_contig_124	120713
GENSCAN00000029954	NorthernBobwhite_ScaffoldedDeNovo_contig_126	11083
GENSCAN00000029925	NorthernBobwhite_ScaffoldedDeNovo_contig_126	14650
GENSCAN00000031678	NorthernBobwhite_ScaffoldedDeNovo_contig_127	2089
GENSCAN00000031699	NorthernBobwhite_ScaffoldedDeNovo_contig_127	10582
GENSCAN00000025838	NorthernBobwhite_ScaffoldedDeNovo_contig_129	42812
GENSCAN00000001774	NorthernBobwhite_ScaffoldedDeNovo_contig_129	64178
GENSCAN00000001810	NorthernBobwhite_ScaffoldedDeNovo_contig_129	69112
GENSCAN00000001802	NorthernBobwhite_ScaffoldedDeNovo_contig_129	129987
GENSCAN00000001778	NorthernBobwhite_ScaffoldedDeNovo_contig_129	138944
GENSCAN00000001795	NorthernBobwhite_ScaffoldedDeNovo_contig_129	146039
GENSCAN00000001805	NorthernBobwhite_ScaffoldedDeNovo_contig_129	153153
GENSCAN00000001808	NorthernBobwhite_ScaffoldedDeNovo_contig_129	161512
GENSCAN00000001799	NorthernBobwhite_ScaffoldedDeNovo_contig_129	166650
GENSCAN00000001807	NorthernBobwhite_ScaffoldedDeNovo_contig_129	202816
GENSCAN00000001764	NorthernBobwhite_ScaffoldedDeNovo_contig_129	222301
GENSCAN00000001763	NorthernBobwhite_ScaffoldedDeNovo_contig_129	228730
GENSCAN00000001772	NorthernBobwhite_ScaffoldedDeNovo_contig_129	264248
GENSCAN00000001793	NorthernBobwhite_ScaffoldedDeNovo_contig_129	282161
GENSCAN00000025774	NorthernBobwhite_ScaffoldedDeNovo_contig_130	29893
GENSCAN00000011640	NorthernBobwhite_ScaffoldedDeNovo_contig_131	18654
GENSCAN00000011650	NorthernBobwhite_ScaffoldedDeNovo_contig_131	24564
GENSCAN00000011653	NorthernBobwhite_ScaffoldedDeNovo_contig_131	42427
GENSCAN00000011649	NorthernBobwhite_ScaffoldedDeNovo_contig_131	63656
GENSCAN00000014847	NorthernBobwhite_ScaffoldedDeNovo_contig_132	34999
GENSCAN00000037317	NorthernBobwhite_ScaffoldedDeNovo_contig_133	10102
GENSCAN00000037281	NorthernBobwhite_ScaffoldedDeNovo_contig_133	19120
GENSCAN00000037310	NorthernBobwhite_ScaffoldedDeNovo_contig_133	22282
GENSCAN00000037318	NorthernBobwhite_ScaffoldedDeNovo_contig_133	41107
GENSCAN00000037315	NorthernBobwhite_ScaffoldedDeNovo_contig_133	57204
GENSCAN00000037286	NorthernBobwhite_ScaffoldedDeNovo_contig_133	92675
GENSCAN00000037299	NorthernBobwhite_ScaffoldedDeNovo_contig_133	140096
GENSCAN00000009948	NorthernBobwhite_ScaffoldedDeNovo_contig_134	6074
GENSCAN00000020996	NorthernBobwhite_ScaffoldedDeNovo_contig_135	976
GENSCAN00000009099	NorthernBobwhite_ScaffoldedDeNovo_contig_136	232
GENSCAN00000009115	NorthernBobwhite_ScaffoldedDeNovo_contig_137	33644
GENSCAN00000009146	NorthernBobwhite_ScaffoldedDeNovo_contig_137	85441
GENSCAN00000009138	NorthernBobwhite_ScaffoldedDeNovo_contig_137	95558
GENSCAN00000009110	NorthernBobwhite_ScaffoldedDeNovo_contig_137	103406
GENSCAN00000009145	NorthernBobwhite_ScaffoldedDeNovo_contig_137	107042
GENSCAN00000012738	NorthernBobwhite_ScaffoldedDeNovo_contig_139	6853
GENSCAN00000033210	NorthernBobwhite_ScaffoldedDeNovo_contig_139	14144
GENSCAN00000012688	NorthernBobwhite_ScaffoldedDeNovo_contig_139	18165
GENSCAN00000012707	NorthernBobwhite_ScaffoldedDeNovo_contig_139	36244
GENSCAN00000012724	NorthernBobwhite_ScaffoldedDeNovo_contig_139	65126
GENSCAN00000012732	NorthernBobwhite_ScaffoldedDeNovo_contig_139	72447
GENSCAN00000003660	NorthernBobwhite_ScaffoldedDeNovo_contig_141	8978
GENSCAN00000003662	NorthernBobwhite_ScaffoldedDeNovo_contig_141	18596
GENSCAN00000018911	NorthernBobwhite_ScaffoldedDeNovo_contig_142	5966
GENSCAN00000018902	NorthernBobwhite_ScaffoldedDeNovo_contig_142	42519
GENSCAN00000018900	NorthernBobwhite_ScaffoldedDeNovo_contig_142	62972
GENSCAN00000018897	NorthernBobwhite_ScaffoldedDeNovo_contig_142	72511
GENSCAN00000004471	NorthernBobwhite_ScaffoldedDeNovo_contig_144	34106
GENSCAN00000004507	NorthernBobwhite_ScaffoldedDeNovo_contig_144	85225
GENSCAN00000037477	NorthernBobwhite_ScaffoldedDeNovo_contig_145	7142
GENSCAN00000037463	NorthernBobwhite_ScaffoldedDeNovo_contig_145	18169
GENSCAN00000037475	NorthernBobwhite_ScaffoldedDeNovo_contig_145	22342
GENSCAN00000037466	NorthernBobwhite_ScaffoldedDeNovo_contig_145	38055
GENSCAN00000037460	NorthernBobwhite_ScaffoldedDeNovo_contig_145	47637
GENSCAN00000015020	NorthernBobwhite_ScaffoldedDeNovo_contig_147	20183
GENSCAN00000014992	NorthernBobwhite_ScaffoldedDeNovo_contig_147	36688
GENSCAN00000014999	NorthernBobwhite_ScaffoldedDeNovo_contig_147	39562
GENSCAN00000014995	NorthernBobwhite_ScaffoldedDeNovo_contig_147	74755
GENSCAN00000015012	NorthernBobwhite_ScaffoldedDeNovo_contig_147	76928
GENSCAN00000014996	NorthernBobwhite_ScaffoldedDeNovo_contig_147	115144
GENSCAN00000015646	NorthernBobwhite_ScaffoldedDeNovo_contig_147	148367
GENSCAN00000007279	NorthernBobwhite_ScaffoldedDeNovo_contig_148	7978
GENSCAN00000007274	NorthernBobwhite_ScaffoldedDeNovo_contig_148	45333
GENSCAN00000007265	NorthernBobwhite_ScaffoldedDeNovo_contig_148	56896
GENSCAN00000007280	NorthernBobwhite_ScaffoldedDeNovo_contig_148	70587
GENSCAN00000028482	NorthernBobwhite_ScaffoldedDeNovo_contig_149	5443
GENSCAN00000008038	NorthernBobwhite_ScaffoldedDeNovo_contig_151	35871
GENSCAN00000008037	NorthernBobwhite_ScaffoldedDeNovo_contig_151	38876
GENSCAN00000009326	NorthernBobwhite_ScaffoldedDeNovo_contig_152	6045
GENSCAN00000029833	NorthernBobwhite_ScaffoldedDeNovo_contig_153	5804
GENSCAN00000029838	NorthernBobwhite_ScaffoldedDeNovo_contig_153	24451
GENSCAN00000029831	NorthernBobwhite_ScaffoldedDeNovo_contig_153	47035
GENSCAN00000029840	NorthernBobwhite_ScaffoldedDeNovo_contig_153	53019
GENSCAN00000011483	NorthernBobwhite_ScaffoldedDeNovo_contig_154	19043
GENSCAN00000026787	NorthernBobwhite_ScaffoldedDeNovo_contig_155	3109
GENSCAN00000026760	NorthernBobwhite_ScaffoldedDeNovo_contig_155	6826
GENSCAN00000008969	NorthernBobwhite_ScaffoldedDeNovo_contig_155	10481
GENSCAN00000009657	NorthernBobwhite_ScaffoldedDeNovo_contig_155	11810
GENSCAN00000026766	NorthernBobwhite_ScaffoldedDeNovo_contig_155	14741
GENSCAN00000029306	NorthernBobwhite_ScaffoldedDeNovo_contig_155	15360
GENSCAN00000040114	NorthernBobwhite_ScaffoldedDeNovo_contig_157	381
GENSCAN00000040090	NorthernBobwhite_ScaffoldedDeNovo_contig_157	5397
GENSCAN00000011931	NorthernBobwhite_ScaffoldedDeNovo_contig_161	12098
GENSCAN00000011939	NorthernBobwhite_ScaffoldedDeNovo_contig_161	53607
GENSCAN00000006907	NorthernBobwhite_ScaffoldedDeNovo_contig_164	1
GENSCAN00000006917	NorthernBobwhite_ScaffoldedDeNovo_contig_164	1
GENSCAN00000006923	NorthernBobwhite_ScaffoldedDeNovo_contig_164	1
GENSCAN00000034396	NorthernBobwhite_ScaffoldedDeNovo_contig_164	1
GENSCAN00000007413	NorthernBobwhite_ScaffoldedDeNovo_contig_164	284
GENSCAN00000009632	NorthernBobwhite_ScaffoldedDeNovo_contig_164	301
GENSCAN00000016184	NorthernBobwhite_ScaffoldedDeNovo_contig_164	372
GENSCAN00000006770	NorthernBobwhite_ScaffoldedDeNovo_contig_164	378
GENSCAN00000006782	NorthernBobwhite_ScaffoldedDeNovo_contig_164	378
GENSCAN00000030507	NorthernBobwhite_ScaffoldedDeNovo_contig_164	408
GENSCAN00000006784	NorthernBobwhite_ScaffoldedDeNovo_contig_164	486
GENSCAN00000035045	NorthernBobwhite_ScaffoldedDeNovo_contig_164	645
GENSCAN00000031328	NorthernBobwhite_ScaffoldedDeNovo_contig_165	113103
GENSCAN00000031314	NorthernBobwhite_ScaffoldedDeNovo_contig_165	128136
GENSCAN00000031317	NorthernBobwhite_ScaffoldedDeNovo_contig_165	165842
GENSCAN00000004984	NorthernBobwhite_ScaffoldedDeNovo_contig_165	214622
GENSCAN00000012982	NorthernBobwhite_ScaffoldedDeNovo_contig_166	19311
GENSCAN00000029649	NorthernBobwhite_ScaffoldedDeNovo_contig_166	22773
GENSCAN00000010688	NorthernBobwhite_ScaffoldedDeNovo_contig_166	26328
GENSCAN00000007046	NorthernBobwhite_ScaffoldedDeNovo_contig_166	40619
GENSCAN00000029823	NorthernBobwhite_ScaffoldedDeNovo_contig_166	40619
GENSCAN00000027887	NorthernBobwhite_ScaffoldedDeNovo_contig_166	40619
GENSCAN00000013908	NorthernBobwhite_ScaffoldedDeNovo_contig_166	52011
GENSCAN00000017925	NorthernBobwhite_ScaffoldedDeNovo_contig_166	52011
GENSCAN00000020391	NorthernBobwhite_ScaffoldedDeNovo_contig_166	52972
GENSCAN00000032655	NorthernBobwhite_ScaffoldedDeNovo_contig_166	65274
GENSCAN00000032646	NorthernBobwhite_ScaffoldedDeNovo_contig_166	66676
GENSCAN00000032657	NorthernBobwhite_ScaffoldedDeNovo_contig_166	71644
GENSCAN00000034761	NorthernBobwhite_ScaffoldedDeNovo_contig_166	80543
GENSCAN00000026714	NorthernBobwhite_ScaffoldedDeNovo_contig_166	80547
GENSCAN00000032637	NorthernBobwhite_ScaffoldedDeNovo_contig_166	91119
GENSCAN00000017434	NorthernBobwhite_ScaffoldedDeNovo_contig_167	17382
GENSCAN00000017442	NorthernBobwhite_ScaffoldedDeNovo_contig_167	22365
GENSCAN00000017431	NorthernBobwhite_ScaffoldedDeNovo_contig_167	99795
GENSCAN00000017421	NorthernBobwhite_ScaffoldedDeNovo_contig_167	135634
GENSCAN00000017422	NorthernBobwhite_ScaffoldedDeNovo_contig_167	148201
GENSCAN00000026793	NorthernBobwhite_ScaffoldedDeNovo_contig_168	11688
GENSCAN00000026805	NorthernBobwhite_ScaffoldedDeNovo_contig_168	68030
GENSCAN00000026826	NorthernBobwhite_ScaffoldedDeNovo_contig_168	84095
GENSCAN00000016031	NorthernBobwhite_ScaffoldedDeNovo_contig_170	838
GENSCAN00000016034	NorthernBobwhite_ScaffoldedDeNovo_contig_170	53927
GENSCAN00000006698	NorthernBobwhite_ScaffoldedDeNovo_contig_173	51809
GENSCAN00000006680	NorthernBobwhite_ScaffoldedDeNovo_contig_173	61570
GENSCAN00000006690	NorthernBobwhite_ScaffoldedDeNovo_contig_173	67654
GENSCAN00000019800	NorthernBobwhite_ScaffoldedDeNovo_contig_174	7239
GENSCAN00000009559	NorthernBobwhite_ScaffoldedDeNovo_contig_175	1709
GENSCAN00000009533	NorthernBobwhite_ScaffoldedDeNovo_contig_175	26035
GENSCAN00000009541	NorthernBobwhite_ScaffoldedDeNovo_contig_175	61202
GENSCAN00000009542	NorthernBobwhite_ScaffoldedDeNovo_contig_175	83725
GENSCAN00000009534	NorthernBobwhite_ScaffoldedDeNovo_contig_175	123787
GENSCAN00000019913	NorthernBobwhite_ScaffoldedDeNovo_contig_176	34671
GENSCAN00000035249	NorthernBobwhite_ScaffoldedDeNovo_contig_178	7090
GENSCAN00000035277	NorthernBobwhite_ScaffoldedDeNovo_contig_178	27898
GENSCAN00000035274	NorthernBobwhite_ScaffoldedDeNovo_contig_179	9988
GENSCAN00000008859	NorthernBobwhite_ScaffoldedDeNovo_contig_181	38834
GENSCAN00000008849	NorthernBobwhite_ScaffoldedDeNovo_contig_181	61736
GENSCAN00000004868	NorthernBobwhite_ScaffoldedDeNovo_contig_185	4775
GENSCAN00000004854	NorthernBobwhite_ScaffoldedDeNovo_contig_185	18007
GENSCAN00000004858	NorthernBobwhite_ScaffoldedDeNovo_contig_185	35184
GENSCAN00000038572	NorthernBobwhite_ScaffoldedDeNovo_contig_187	56836
GENSCAN00000023114	NorthernBobwhite_ScaffoldedDeNovo_contig_190	622
GENSCAN00000023113	NorthernBobwhite_ScaffoldedDeNovo_contig_190	45242
GENSCAN00000023092	NorthernBobwhite_ScaffoldedDeNovo_contig_190	65768
GENSCAN00000023093	NorthernBobwhite_ScaffoldedDeNovo_contig_190	95966
GENSCAN00000023096	NorthernBobwhite_ScaffoldedDeNovo_contig_190	118944
GENSCAN00000023109	NorthernBobwhite_ScaffoldedDeNovo_contig_190	122940
GENSCAN00000023088	NorthernBobwhite_ScaffoldedDeNovo_contig_190	169780
GENSCAN00000023100	NorthernBobwhite_ScaffoldedDeNovo_contig_190	176084
GENSCAN00000023087	NorthernBobwhite_ScaffoldedDeNovo_contig_190	182801
GENSCAN00000023098	NorthernBobwhite_ScaffoldedDeNovo_contig_190	193245
GENSCAN00000031618	NorthernBobwhite_ScaffoldedDeNovo_contig_191	24003
GENSCAN00000031654	NorthernBobwhite_ScaffoldedDeNovo_contig_191	47416
GENSCAN00000020278	NorthernBobwhite_ScaffoldedDeNovo_contig_194	10282
GENSCAN00000016632	NorthernBobwhite_ScaffoldedDeNovo_contig_196	694
GENSCAN00000016629	NorthernBobwhite_ScaffoldedDeNovo_contig_196	31932
GENSCAN00000016618	NorthernBobwhite_ScaffoldedDeNovo_contig_196	89728
GENSCAN00000003387	NorthernBobwhite_ScaffoldedDeNovo_contig_197	32556
GENSCAN00000023403	NorthernBobwhite_ScaffoldedDeNovo_contig_198	3536
GENSCAN00000023431	NorthernBobwhite_ScaffoldedDeNovo_contig_198	30296
GENSCAN00000023432	NorthernBobwhite_ScaffoldedDeNovo_contig_198	33339
GENSCAN00000023396	NorthernBobwhite_ScaffoldedDeNovo_contig_198	42021
GENSCAN00000023438	NorthernBobwhite_ScaffoldedDeNovo_contig_198	92186
GENSCAN00000023434	NorthernBobwhite_ScaffoldedDeNovo_contig_198	101172
GENSCAN00000023429	NorthernBobwhite_ScaffoldedDeNovo_contig_198	115494
GENSCAN00000016291	NorthernBobwhite_ScaffoldedDeNovo_contig_199	16643
GENSCAN00000009409	NorthernBobwhite_ScaffoldedDeNovo_contig_200	14837
GENSCAN00000009387	NorthernBobwhite_ScaffoldedDeNovo_contig_200	23766
GENSCAN00000009393	NorthernBobwhite_ScaffoldedDeNovo_contig_200	40060
GENSCAN00000015566	NorthernBobwhite_ScaffoldedDeNovo_contig_201	53023
GENSCAN00000015569	NorthernBobwhite_ScaffoldedDeNovo_contig_201	86314
GENSCAN00000000211	NorthernBobwhite_ScaffoldedDeNovo_contig_202	4862
GENSCAN00000000204	NorthernBobwhite_ScaffoldedDeNovo_contig_202	16118
GENSCAN00000000212	NorthernBobwhite_ScaffoldedDeNovo_contig_202	33998
GENSCAN00000000213	NorthernBobwhite_ScaffoldedDeNovo_contig_202	40890
GENSCAN00000000226	NorthernBobwhite_ScaffoldedDeNovo_contig_202	62085
GENSCAN00000023170	NorthernBobwhite_ScaffoldedDeNovo_contig_203	6778
GENSCAN00000032187	NorthernBobwhite_ScaffoldedDeNovo_contig_205	39074
GENSCAN00000032186	NorthernBobwhite_ScaffoldedDeNovo_contig_205	80416
GENSCAN00000032163	NorthernBobwhite_ScaffoldedDeNovo_contig_205	96768
GENSCAN00000012084	NorthernBobwhite_ScaffoldedDeNovo_contig_206	1046
GENSCAN00000012067	NorthernBobwhite_ScaffoldedDeNovo_contig_206	11472
GENSCAN00000017170	NorthernBobwhite_ScaffoldedDeNovo_contig_208	1383
GENSCAN00000017156	NorthernBobwhite_ScaffoldedDeNovo_contig_208	4521
GENSCAN00000017187	NorthernBobwhite_ScaffoldedDeNovo_contig_208	8815
GENSCAN00000017190	NorthernBobwhite_ScaffoldedDeNovo_contig_208	30994
GENSCAN00000017182	NorthernBobwhite_ScaffoldedDeNovo_contig_208	33645
GENSCAN00000014803	NorthernBobwhite_ScaffoldedDeNovo_contig_212	1600
GENSCAN00000014788	NorthernBobwhite_ScaffoldedDeNovo_contig_212	10501
GENSCAN00000016823	NorthernBobwhite_ScaffoldedDeNovo_contig_213	210387
GENSCAN00000015741	NorthernBobwhite_ScaffoldedDeNovo_contig_213	243300
GENSCAN00000020290	NorthernBobwhite_ScaffoldedDeNovo_contig_214	1340
GENSCAN00000020287	NorthernBobwhite_ScaffoldedDeNovo_contig_214	23989
GENSCAN00000034814	NorthernBobwhite_ScaffoldedDeNovo_contig_215	13602
GENSCAN00000012425	NorthernBobwhite_ScaffoldedDeNovo_contig_218	11518
GENSCAN00000009363	NorthernBobwhite_ScaffoldedDeNovo_contig_219	20
GENSCAN00000028425	NorthernBobwhite_ScaffoldedDeNovo_contig_220	13672
GENSCAN00000028410	NorthernBobwhite_ScaffoldedDeNovo_contig_220	32567
GENSCAN00000028431	NorthernBobwhite_ScaffoldedDeNovo_contig_220	97293
GENSCAN00000028437	NorthernBobwhite_ScaffoldedDeNovo_contig_220	134226
GENSCAN00000028420	NorthernBobwhite_ScaffoldedDeNovo_contig_220	141407
GENSCAN00000028417	NorthernBobwhite_ScaffoldedDeNovo_contig_220	158643
GENSCAN00000028413	NorthernBobwhite_ScaffoldedDeNovo_contig_220	163017
GENSCAN00000028441	NorthernBobwhite_ScaffoldedDeNovo_contig_220	204556
GENSCAN00000034362	NorthernBobwhite_ScaffoldedDeNovo_contig_222	22491
GENSCAN00000011956	NorthernBobwhite_ScaffoldedDeNovo_contig_223	4141
GENSCAN00000010570	NorthernBobwhite_ScaffoldedDeNovo_contig_224	8898
GENSCAN00000010557	NorthernBobwhite_ScaffoldedDeNovo_contig_224	19003
GENSCAN00000014385	NorthernBobwhite_ScaffoldedDeNovo_contig_224	31997
GENSCAN00000014417	NorthernBobwhite_ScaffoldedDeNovo_contig_224	32764
GENSCAN00000019160	NorthernBobwhite_ScaffoldedDeNovo_contig_224	34154
GENSCAN00000033759	NorthernBobwhite_ScaffoldedDeNovo_contig_224	47065
GENSCAN00000021375	NorthernBobwhite_ScaffoldedDeNovo_contig_227	19771
GENSCAN00000039993	NorthernBobwhite_ScaffoldedDeNovo_contig_229	5555
GENSCAN00000039991	NorthernBobwhite_ScaffoldedDeNovo_contig_229	60517
GENSCAN00000039988	NorthernBobwhite_ScaffoldedDeNovo_contig_229	64230
GENSCAN00000039970	NorthernBobwhite_ScaffoldedDeNovo_contig_229	104775
GENSCAN00000038873	NorthernBobwhite_ScaffoldedDeNovo_contig_230	44285
GENSCAN00000005231	NorthernBobwhite_ScaffoldedDeNovo_contig_232	18909
GENSCAN00000005221	NorthernBobwhite_ScaffoldedDeNovo_contig_232	50250
GENSCAN00000005222	NorthernBobwhite_ScaffoldedDeNovo_contig_232	67067
GENSCAN00000005223	NorthernBobwhite_ScaffoldedDeNovo_contig_232	86620
GENSCAN00000038914	NorthernBobwhite_ScaffoldedDeNovo_contig_233	45510
GENSCAN00000008607	NorthernBobwhite_ScaffoldedDeNovo_contig_235	3447
GENSCAN00000035763	NorthernBobwhite_ScaffoldedDeNovo_contig_238	7400
GENSCAN00000016717	NorthernBobwhite_ScaffoldedDeNovo_contig_239	130973
GENSCAN00000016719	NorthernBobwhite_ScaffoldedDeNovo_contig_239	157892
GENSCAN00000016733	NorthernBobwhite_ScaffoldedDeNovo_contig_239	163518
GENSCAN00000016720	NorthernBobwhite_ScaffoldedDeNovo_contig_239	193895
GENSCAN00000016711	NorthernBobwhite_ScaffoldedDeNovo_contig_239	213264
GENSCAN00000019593	NorthernBobwhite_ScaffoldedDeNovo_contig_240	4700
GENSCAN00000002976	NorthernBobwhite_ScaffoldedDeNovo_contig_241	1755
GENSCAN00000002969	NorthernBobwhite_ScaffoldedDeNovo_contig_241	49530
GENSCAN00000021325	NorthernBobwhite_ScaffoldedDeNovo_contig_242	7728
GENSCAN00000021372	NorthernBobwhite_ScaffoldedDeNovo_contig_242	11308
GENSCAN00000021322	NorthernBobwhite_ScaffoldedDeNovo_contig_242	15530
GENSCAN00000021397	NorthernBobwhite_ScaffoldedDeNovo_contig_242	17617
GENSCAN00000021387	NorthernBobwhite_ScaffoldedDeNovo_contig_242	41498
GENSCAN00000028101	NorthernBobwhite_ScaffoldedDeNovo_contig_243	9891
GENSCAN00000036911	NorthernBobwhite_ScaffoldedDeNovo_contig_245	1313
GENSCAN00000033539	NorthernBobwhite_ScaffoldedDeNovo_contig_249	15547
GENSCAN00000034975	NorthernBobwhite_ScaffoldedDeNovo_contig_249	31040
GENSCAN00000021226	NorthernBobwhite_ScaffoldedDeNovo_contig_250	1
GENSCAN00000021227	NorthernBobwhite_ScaffoldedDeNovo_contig_250	29013
GENSCAN00000021204	NorthernBobwhite_ScaffoldedDeNovo_contig_250	39895
GENSCAN00000021210	NorthernBobwhite_ScaffoldedDeNovo_contig_250	51819
GENSCAN00000021218	NorthernBobwhite_ScaffoldedDeNovo_contig_250	96301
GENSCAN00000021207	NorthernBobwhite_ScaffoldedDeNovo_contig_250	117141
GENSCAN00000021220	NorthernBobwhite_ScaffoldedDeNovo_contig_250	123420
GENSCAN00000021208	NorthernBobwhite_ScaffoldedDeNovo_contig_250	133427
GENSCAN00000034260	NorthernBobwhite_ScaffoldedDeNovo_contig_251	4368
GENSCAN00000034267	NorthernBobwhite_ScaffoldedDeNovo_contig_251	17645
GENSCAN00000034274	NorthernBobwhite_ScaffoldedDeNovo_contig_251	37613
GENSCAN00000035248	NorthernBobwhite_ScaffoldedDeNovo_contig_251	49231
GENSCAN00000027263	NorthernBobwhite_ScaffoldedDeNovo_contig_252	6578
GENSCAN00000028771	NorthernBobwhite_ScaffoldedDeNovo_contig_253	750
GENSCAN00000003455	NorthernBobwhite_ScaffoldedDeNovo_contig_253	766
GENSCAN00000001916	NorthernBobwhite_ScaffoldedDeNovo_contig_253	771
GENSCAN00000019341	NorthernBobwhite_ScaffoldedDeNovo_contig_253	771
GENSCAN00000004179	NorthernBobwhite_ScaffoldedDeNovo_contig_253	771
GENSCAN00000014603	NorthernBobwhite_ScaffoldedDeNovo_contig_253	771
GENSCAN00000024146	NorthernBobwhite_ScaffoldedDeNovo_contig_253	771
GENSCAN00000007904	NorthernBobwhite_ScaffoldedDeNovo_contig_253	772
GENSCAN00000016155	NorthernBobwhite_ScaffoldedDeNovo_contig_253	783
GENSCAN00000006543	NorthernBobwhite_ScaffoldedDeNovo_contig_253	787
GENSCAN00000029811	NorthernBobwhite_ScaffoldedDeNovo_contig_253	787
GENSCAN00000016200	NorthernBobwhite_ScaffoldedDeNovo_contig_253	807
GENSCAN00000028816	NorthernBobwhite_ScaffoldedDeNovo_contig_253	819
GENSCAN00000040084	NorthernBobwhite_ScaffoldedDeNovo_contig_253	948
GENSCAN00000025829	NorthernBobwhite_ScaffoldedDeNovo_contig_256	446
GENSCAN00000025837	NorthernBobwhite_ScaffoldedDeNovo_contig_256	18178
GENSCAN00000025828	NorthernBobwhite_ScaffoldedDeNovo_contig_256	21894
GENSCAN00000018377	NorthernBobwhite_ScaffoldedDeNovo_contig_257	30111
GENSCAN00000007245	NorthernBobwhite_ScaffoldedDeNovo_contig_260	28592
GENSCAN00000035689	NorthernBobwhite_ScaffoldedDeNovo_contig_260	48519
GENSCAN00000022808	NorthernBobwhite_ScaffoldedDeNovo_contig_261	4375
GENSCAN00000022820	NorthernBobwhite_ScaffoldedDeNovo_contig_261	29244
GENSCAN00000012770	NorthernBobwhite_ScaffoldedDeNovo_contig_262	16516
GENSCAN00000012761	NorthernBobwhite_ScaffoldedDeNovo_contig_262	42445
GENSCAN00000005019	NorthernBobwhite_ScaffoldedDeNovo_contig_265	232
GENSCAN00000004987	NorthernBobwhite_ScaffoldedDeNovo_contig_265	2273
GENSCAN00000005013	NorthernBobwhite_ScaffoldedDeNovo_contig_265	30322
GENSCAN00000005004	NorthernBobwhite_ScaffoldedDeNovo_contig_265	45300
GENSCAN00000037239	NorthernBobwhite_ScaffoldedDeNovo_contig_268	4128
GENSCAN00000037240	NorthernBobwhite_ScaffoldedDeNovo_contig_268	15166
GENSCAN00000037236	NorthernBobwhite_ScaffoldedDeNovo_contig_268	60398
GENSCAN00000037242	NorthernBobwhite_ScaffoldedDeNovo_contig_268	128314
GENSCAN00000018470	NorthernBobwhite_ScaffoldedDeNovo_contig_269	12827
GENSCAN00000018488	NorthernBobwhite_ScaffoldedDeNovo_contig_269	92241
GENSCAN00000031813	NorthernBobwhite_ScaffoldedDeNovo_contig_270	9276
GENSCAN00000007078	NorthernBobwhite_ScaffoldedDeNovo_contig_272	1912
GENSCAN00000027790	NorthernBobwhite_ScaffoldedDeNovo_contig_272	23742
GENSCAN00000007053	NorthernBobwhite_ScaffoldedDeNovo_contig_272	41767
GENSCAN00000007057	NorthernBobwhite_ScaffoldedDeNovo_contig_272	75737
GENSCAN00000007075	NorthernBobwhite_ScaffoldedDeNovo_contig_272	93772
GENSCAN00000034815	NorthernBobwhite_ScaffoldedDeNovo_contig_273	13458
GENSCAN00000007382	NorthernBobwhite_ScaffoldedDeNovo_contig_273	94238
GENSCAN00000007325	NorthernBobwhite_ScaffoldedDeNovo_contig_273	107400
GENSCAN00000009834	NorthernBobwhite_ScaffoldedDeNovo_contig_276	20743
GENSCAN00000018049	NorthernBobwhite_ScaffoldedDeNovo_contig_279	23181
GENSCAN00000018052	NorthernBobwhite_ScaffoldedDeNovo_contig_279	33404
GENSCAN00000035616	NorthernBobwhite_ScaffoldedDeNovo_contig_283	178184
GENSCAN00000035604	NorthernBobwhite_ScaffoldedDeNovo_contig_283	224090
GENSCAN00000035602	NorthernBobwhite_ScaffoldedDeNovo_contig_283	274009
GENSCAN00000030866	NorthernBobwhite_ScaffoldedDeNovo_contig_284	11023
GENSCAN00000030860	NorthernBobwhite_ScaffoldedDeNovo_contig_284	18842
GENSCAN00000028805	NorthernBobwhite_ScaffoldedDeNovo_contig_286	92371
GENSCAN00000016523	NorthernBobwhite_ScaffoldedDeNovo_contig_287	11234
GENSCAN00000001947	NorthernBobwhite_ScaffoldedDeNovo_contig_288	1324
GENSCAN00000001943	NorthernBobwhite_ScaffoldedDeNovo_contig_288	35483
GENSCAN00000035952	NorthernBobwhite_ScaffoldedDeNovo_contig_290	1792
GENSCAN00000000747	NorthernBobwhite_ScaffoldedDeNovo_contig_291	15153
GENSCAN00000027802	NorthernBobwhite_ScaffoldedDeNovo_contig_292	9332
GENSCAN00000024016	NorthernBobwhite_ScaffoldedDeNovo_contig_295	43784
GENSCAN00000024032	NorthernBobwhite_ScaffoldedDeNovo_contig_295	48935
GENSCAN00000024035	NorthernBobwhite_ScaffoldedDeNovo_contig_295	94037
GENSCAN00000016063	NorthernBobwhite_ScaffoldedDeNovo_contig_297	21221
GENSCAN00000016068	NorthernBobwhite_ScaffoldedDeNovo_contig_297	32242
GENSCAN00000037804	NorthernBobwhite_ScaffoldedDeNovo_contig_299	52067
GENSCAN00000037805	NorthernBobwhite_ScaffoldedDeNovo_contig_299	63780
GENSCAN00000037815	NorthernBobwhite_ScaffoldedDeNovo_contig_299	91528
GENSCAN00000037835	NorthernBobwhite_ScaffoldedDeNovo_contig_299	100643
GENSCAN00000035903	NorthernBobwhite_ScaffoldedDeNovo_contig_300	8753
GENSCAN00000035922	NorthernBobwhite_ScaffoldedDeNovo_contig_300	31204
GENSCAN00000035909	NorthernBobwhite_ScaffoldedDeNovo_contig_300	37625
GENSCAN00000000231	NorthernBobwhite_ScaffoldedDeNovo_contig_301	8234
GENSCAN00000000235	NorthernBobwhite_ScaffoldedDeNovo_contig_301	22220
GENSCAN00000000202	NorthernBobwhite_ScaffoldedDeNovo_contig_301	31705
GENSCAN00000000227	NorthernBobwhite_ScaffoldedDeNovo_contig_301	36321
GENSCAN00000000241	NorthernBobwhite_ScaffoldedDeNovo_contig_301	59781
GENSCAN00000000237	NorthernBobwhite_ScaffoldedDeNovo_contig_301	96635
GENSCAN00000036558	NorthernBobwhite_ScaffoldedDeNovo_contig_302	13146
GENSCAN00000036523	NorthernBobwhite_ScaffoldedDeNovo_contig_302	24449
GENSCAN00000010063	NorthernBobwhite_ScaffoldedDeNovo_contig_302	56218
GENSCAN00000010062	NorthernBobwhite_ScaffoldedDeNovo_contig_302	64921
GENSCAN00000015443	NorthernBobwhite_ScaffoldedDeNovo_contig_305	8114
GENSCAN00000013334	NorthernBobwhite_ScaffoldedDeNovo_contig_306	34633
GENSCAN00000013348	NorthernBobwhite_ScaffoldedDeNovo_contig_306	41293
GENSCAN00000018357	NorthernBobwhite_ScaffoldedDeNovo_contig_308	15476
GENSCAN00000018361	NorthernBobwhite_ScaffoldedDeNovo_contig_308	34079
GENSCAN00000018354	NorthernBobwhite_ScaffoldedDeNovo_contig_308	62725
GENSCAN00000018378	NorthernBobwhite_ScaffoldedDeNovo_contig_308	72554
GENSCAN00000029706	NorthernBobwhite_ScaffoldedDeNovo_contig_310	2637
GENSCAN00000029705	NorthernBobwhite_ScaffoldedDeNovo_contig_310	15981
GENSCAN00000029702	NorthernBobwhite_ScaffoldedDeNovo_contig_310	35100
GENSCAN00000039742	NorthernBobwhite_ScaffoldedDeNovo_contig_311	2247
GENSCAN00000029265	NorthernBobwhite_ScaffoldedDeNovo_contig_312	53501
GENSCAN00000029267	NorthernBobwhite_ScaffoldedDeNovo_contig_312	65883
GENSCAN00000020445	NorthernBobwhite_ScaffoldedDeNovo_contig_314	16432
GENSCAN00000008736	NorthernBobwhite_ScaffoldedDeNovo_contig_315	13539
GENSCAN00000036899	NorthernBobwhite_ScaffoldedDeNovo_contig_317	415
GENSCAN00000036915	NorthernBobwhite_ScaffoldedDeNovo_contig_317	5251
GENSCAN00000037253	NorthernBobwhite_ScaffoldedDeNovo_contig_319	18995
GENSCAN00000005981	NorthernBobwhite_ScaffoldedDeNovo_contig_321	9845
GENSCAN00000021776	NorthernBobwhite_ScaffoldedDeNovo_contig_321	9845
GENSCAN00000034284	NorthernBobwhite_ScaffoldedDeNovo_contig_322	26791
GENSCAN00000001899	NorthernBobwhite_ScaffoldedDeNovo_contig_323	445
GENSCAN00000001879	NorthernBobwhite_ScaffoldedDeNovo_contig_323	2196
GENSCAN00000001866	NorthernBobwhite_ScaffoldedDeNovo_contig_323	10251
GENSCAN00000001885	NorthernBobwhite_ScaffoldedDeNovo_contig_323	17897
GENSCAN00000019421	NorthernBobwhite_ScaffoldedDeNovo_contig_327	5665
GENSCAN00000019418	NorthernBobwhite_ScaffoldedDeNovo_contig_327	14357
GENSCAN00000019444	NorthernBobwhite_ScaffoldedDeNovo_contig_327	26889
GENSCAN00000009974	NorthernBobwhite_ScaffoldedDeNovo_contig_328	5645
GENSCAN00000039076	NorthernBobwhite_ScaffoldedDeNovo_contig_329	93038
GENSCAN00000018344	NorthernBobwhite_ScaffoldedDeNovo_contig_331	21123
GENSCAN00000018338	NorthernBobwhite_ScaffoldedDeNovo_contig_331	36543
GENSCAN00000018314	NorthernBobwhite_ScaffoldedDeNovo_contig_331	44113
GENSCAN00000038510	NorthernBobwhite_ScaffoldedDeNovo_contig_332	9840
GENSCAN00000038507	NorthernBobwhite_ScaffoldedDeNovo_contig_332	35256
GENSCAN00000038498	NorthernBobwhite_ScaffoldedDeNovo_contig_332	42199
GENSCAN00000028723	NorthernBobwhite_ScaffoldedDeNovo_contig_332	46175
GENSCAN00000028718	NorthernBobwhite_ScaffoldedDeNovo_contig_332	69310
GENSCAN00000028722	NorthernBobwhite_ScaffoldedDeNovo_contig_332	115964
GENSCAN00000028688	NorthernBobwhite_ScaffoldedDeNovo_contig_332	187100
GENSCAN00000028698	NorthernBobwhite_ScaffoldedDeNovo_contig_332	219624
GENSCAN00000032058	NorthernBobwhite_ScaffoldedDeNovo_contig_336	2234
GENSCAN00000032063	NorthernBobwhite_ScaffoldedDeNovo_contig_336	9468
GENSCAN00000032087	NorthernBobwhite_ScaffoldedDeNovo_contig_336	11706
GENSCAN00000032079	NorthernBobwhite_ScaffoldedDeNovo_contig_336	25800
GENSCAN00000032049	NorthernBobwhite_ScaffoldedDeNovo_contig_336	37453
GENSCAN00000030567	NorthernBobwhite_ScaffoldedDeNovo_contig_336	59851
GENSCAN00000012099	NorthernBobwhite_ScaffoldedDeNovo_contig_337	42447
GENSCAN00000012065	NorthernBobwhite_ScaffoldedDeNovo_contig_337	59807
GENSCAN00000012096	NorthernBobwhite_ScaffoldedDeNovo_contig_337	62873
GENSCAN00000012106	NorthernBobwhite_ScaffoldedDeNovo_contig_337	65594
GENSCAN00000012102	NorthernBobwhite_ScaffoldedDeNovo_contig_337	82547
GENSCAN00000038889	NorthernBobwhite_ScaffoldedDeNovo_contig_341	73484
GENSCAN00000038845	NorthernBobwhite_ScaffoldedDeNovo_contig_341	80390
GENSCAN00000037982	NorthernBobwhite_ScaffoldedDeNovo_contig_342	10062
GENSCAN00000024843	NorthernBobwhite_ScaffoldedDeNovo_contig_345	12472
GENSCAN00000025882	NorthernBobwhite_ScaffoldedDeNovo_contig_346	35986
GENSCAN00000000830	NorthernBobwhite_ScaffoldedDeNovo_contig_348	1867
GENSCAN00000008343	NorthernBobwhite_ScaffoldedDeNovo_contig_349	25976
GENSCAN00000008345	NorthernBobwhite_ScaffoldedDeNovo_contig_349	32909
GENSCAN00000013859	NorthernBobwhite_ScaffoldedDeNovo_contig_349	45214
GENSCAN00000013892	NorthernBobwhite_ScaffoldedDeNovo_contig_349	48213
GENSCAN00000013839	NorthernBobwhite_ScaffoldedDeNovo_contig_349	58155
GENSCAN00000013838	NorthernBobwhite_ScaffoldedDeNovo_contig_349	81751
GENSCAN00000013858	NorthernBobwhite_ScaffoldedDeNovo_contig_349	104137
GENSCAN00000027045	NorthernBobwhite_ScaffoldedDeNovo_contig_350	18033
GENSCAN00000020178	NorthernBobwhite_ScaffoldedDeNovo_contig_350	25732
GENSCAN00000020232	NorthernBobwhite_ScaffoldedDeNovo_contig_350	150217
GENSCAN00000028424	NorthernBobwhite_ScaffoldedDeNovo_contig_354	26875
GENSCAN00000028439	NorthernBobwhite_ScaffoldedDeNovo_contig_354	41343
GENSCAN00000003817	NorthernBobwhite_ScaffoldedDeNovo_contig_355	285
GENSCAN00000003794	NorthernBobwhite_ScaffoldedDeNovo_contig_355	8917
GENSCAN00000038289	NorthernBobwhite_ScaffoldedDeNovo_contig_356	4531
GENSCAN00000038294	NorthernBobwhite_ScaffoldedDeNovo_contig_356	50443
GENSCAN00000038287	NorthernBobwhite_ScaffoldedDeNovo_contig_356	78331
GENSCAN00000038296	NorthernBobwhite_ScaffoldedDeNovo_contig_356	120536
GENSCAN00000038288	NorthernBobwhite_ScaffoldedDeNovo_contig_356	136836
GENSCAN00000026984	NorthernBobwhite_ScaffoldedDeNovo_contig_358	31157
GENSCAN00000026953	NorthernBobwhite_ScaffoldedDeNovo_contig_358	74595
GENSCAN00000033832	NorthernBobwhite_ScaffoldedDeNovo_contig_359	34065
GENSCAN00000038402	NorthernBobwhite_ScaffoldedDeNovo_contig_361	4106
GENSCAN00000038393	NorthernBobwhite_ScaffoldedDeNovo_contig_361	24410
GENSCAN00000018067	NorthernBobwhite_ScaffoldedDeNovo_contig_362	3523
GENSCAN00000018082	NorthernBobwhite_ScaffoldedDeNovo_contig_362	34007
GENSCAN00000018084	NorthernBobwhite_ScaffoldedDeNovo_contig_362	42416
GENSCAN00000018063	NorthernBobwhite_ScaffoldedDeNovo_contig_362	124849
GENSCAN00000018066	NorthernBobwhite_ScaffoldedDeNovo_contig_362	166591
GENSCAN00000018079	NorthernBobwhite_ScaffoldedDeNovo_contig_362	182591
GENSCAN00000018077	NorthernBobwhite_ScaffoldedDeNovo_contig_362	252742
GENSCAN00000008015	NorthernBobwhite_ScaffoldedDeNovo_contig_362	288601
GENSCAN00000008013	NorthernBobwhite_ScaffoldedDeNovo_contig_362	321211
GENSCAN00000008025	NorthernBobwhite_ScaffoldedDeNovo_contig_362	328387
GENSCAN00000006815	NorthernBobwhite_ScaffoldedDeNovo_contig_363	1188
GENSCAN00000006827	NorthernBobwhite_ScaffoldedDeNovo_contig_363	25331
GENSCAN00000006830	NorthernBobwhite_ScaffoldedDeNovo_contig_363	33056
GENSCAN00000006823	NorthernBobwhite_ScaffoldedDeNovo_contig_363	63210
GENSCAN00000006836	NorthernBobwhite_ScaffoldedDeNovo_contig_363	69438
GENSCAN00000006832	NorthernBobwhite_ScaffoldedDeNovo_contig_363	86047
GENSCAN00000006825	NorthernBobwhite_ScaffoldedDeNovo_contig_363	155656
GENSCAN00000006802	NorthernBobwhite_ScaffoldedDeNovo_contig_363	162394
GENSCAN00000040349	NorthernBobwhite_ScaffoldedDeNovo_contig_363	238738
GENSCAN00000034281	NorthernBobwhite_ScaffoldedDeNovo_contig_365	13822
GENSCAN00000027700	NorthernBobwhite_ScaffoldedDeNovo_contig_366	38527
GENSCAN00000004726	NorthernBobwhite_ScaffoldedDeNovo_contig_367	2917
GENSCAN00000021785	NorthernBobwhite_ScaffoldedDeNovo_contig_369	10629
GENSCAN00000014220	NorthernBobwhite_ScaffoldedDeNovo_contig_371	18957
GENSCAN00000022193	NorthernBobwhite_ScaffoldedDeNovo_contig_372	5833
GENSCAN00000028799	NorthernBobwhite_ScaffoldedDeNovo_contig_372	73067
GENSCAN00000028800	NorthernBobwhite_ScaffoldedDeNovo_contig_372	78546
GENSCAN00000028801	NorthernBobwhite_ScaffoldedDeNovo_contig_372	156611
GENSCAN00000016578	NorthernBobwhite_ScaffoldedDeNovo_contig_372	159355
GENSCAN00000003834	NorthernBobwhite_ScaffoldedDeNovo_contig_374	28953
GENSCAN00000007953	NorthernBobwhite_ScaffoldedDeNovo_contig_374	28953
GENSCAN00000003851	NorthernBobwhite_ScaffoldedDeNovo_contig_374	55312
GENSCAN00000003793	NorthernBobwhite_ScaffoldedDeNovo_contig_374	73281
GENSCAN00000003835	NorthernBobwhite_ScaffoldedDeNovo_contig_374	106458
GENSCAN00000003844	NorthernBobwhite_ScaffoldedDeNovo_contig_374	132433
GENSCAN00000031676	NorthernBobwhite_ScaffoldedDeNovo_contig_375	15005
GENSCAN00000004606	NorthernBobwhite_ScaffoldedDeNovo_contig_377	28124
GENSCAN00000004599	NorthernBobwhite_ScaffoldedDeNovo_contig_377	33970
GENSCAN00000000664	NorthernBobwhite_ScaffoldedDeNovo_contig_379	26725
GENSCAN00000000661	NorthernBobwhite_ScaffoldedDeNovo_contig_379	107234
GENSCAN00000000656	NorthernBobwhite_ScaffoldedDeNovo_contig_379	175916
GENSCAN00000004643	NorthernBobwhite_ScaffoldedDeNovo_contig_382	526
GENSCAN00000004604	NorthernBobwhite_ScaffoldedDeNovo_contig_382	9321
GENSCAN00000004626	NorthernBobwhite_ScaffoldedDeNovo_contig_382	27194
GENSCAN00000004607	NorthernBobwhite_ScaffoldedDeNovo_contig_382	40938
GENSCAN00000004632	NorthernBobwhite_ScaffoldedDeNovo_contig_382	70136
GENSCAN00000022029	NorthernBobwhite_ScaffoldedDeNovo_contig_383	2039
GENSCAN00000022030	NorthernBobwhite_ScaffoldedDeNovo_contig_383	6472
GENSCAN00000010221	NorthernBobwhite_ScaffoldedDeNovo_contig_384	4100
GENSCAN00000010236	NorthernBobwhite_ScaffoldedDeNovo_contig_384	23388
GENSCAN00000032231	NorthernBobwhite_ScaffoldedDeNovo_contig_384	35763
GENSCAN00000010252	NorthernBobwhite_ScaffoldedDeNovo_contig_384	56387
GENSCAN00000035079	NorthernBobwhite_ScaffoldedDeNovo_contig_384	89097
GENSCAN00000005195	NorthernBobwhite_ScaffoldedDeNovo_contig_387	29799
GENSCAN00000005166	NorthernBobwhite_ScaffoldedDeNovo_contig_387	76681
GENSCAN00000017102	NorthernBobwhite_ScaffoldedDeNovo_contig_388	130115
GENSCAN00000036942	NorthernBobwhite_ScaffoldedDeNovo_contig_389	7529
GENSCAN00000011040	NorthernBobwhite_ScaffoldedDeNovo_contig_390	2646
GENSCAN00000011039	NorthernBobwhite_ScaffoldedDeNovo_contig_390	8401
GENSCAN00000011065	NorthernBobwhite_ScaffoldedDeNovo_contig_390	68457
GENSCAN00000011067	NorthernBobwhite_ScaffoldedDeNovo_contig_390	141044
GENSCAN00000011092	NorthernBobwhite_ScaffoldedDeNovo_contig_391	139342
GENSCAN00000011091	NorthernBobwhite_ScaffoldedDeNovo_contig_391	143761
GENSCAN00000007116	NorthernBobwhite_ScaffoldedDeNovo_contig_393	441
GENSCAN00000007141	NorthernBobwhite_ScaffoldedDeNovo_contig_393	9170
GENSCAN00000007150	NorthernBobwhite_ScaffoldedDeNovo_contig_393	28484
GENSCAN00000007147	NorthernBobwhite_ScaffoldedDeNovo_contig_393	38894
GENSCAN00000036897	NorthernBobwhite_ScaffoldedDeNovo_contig_394	15960
GENSCAN00000038672	NorthernBobwhite_ScaffoldedDeNovo_contig_395	1227
GENSCAN00000003588	NorthernBobwhite_ScaffoldedDeNovo_contig_398	16679
GENSCAN00000003577	NorthernBobwhite_ScaffoldedDeNovo_contig_398	208602
GENSCAN00000011553	NorthernBobwhite_ScaffoldedDeNovo_contig_398	272116
GENSCAN00000036071	NorthernBobwhite_ScaffoldedDeNovo_contig_399	4711
GENSCAN00000028641	NorthernBobwhite_ScaffoldedDeNovo_contig_402	19394
GENSCAN00000028655	NorthernBobwhite_ScaffoldedDeNovo_contig_402	39152
GENSCAN00000028646	NorthernBobwhite_ScaffoldedDeNovo_contig_402	47793
GENSCAN00000011160	NorthernBobwhite_ScaffoldedDeNovo_contig_406	103
GENSCAN00000011171	NorthernBobwhite_ScaffoldedDeNovo_contig_406	45325
GENSCAN00000011174	NorthernBobwhite_ScaffoldedDeNovo_contig_406	87049
GENSCAN00000011146	NorthernBobwhite_ScaffoldedDeNovo_contig_406	129469
GENSCAN00000011173	NorthernBobwhite_ScaffoldedDeNovo_contig_406	151528
GENSCAN00000011162	NorthernBobwhite_ScaffoldedDeNovo_contig_406	233605
GENSCAN00000011164	NorthernBobwhite_ScaffoldedDeNovo_contig_406	250659
GENSCAN00000011137	NorthernBobwhite_ScaffoldedDeNovo_contig_406	286804
GENSCAN00000011153	NorthernBobwhite_ScaffoldedDeNovo_contig_406	308790
GENSCAN00000011140	NorthernBobwhite_ScaffoldedDeNovo_contig_406	342089
GENSCAN00000011155	NorthernBobwhite_ScaffoldedDeNovo_contig_406	369626
GENSCAN00000011141	NorthernBobwhite_ScaffoldedDeNovo_contig_406	371515
GENSCAN00000011152	NorthernBobwhite_ScaffoldedDeNovo_contig_406	388007
GENSCAN00000011150	NorthernBobwhite_ScaffoldedDeNovo_contig_406	406102
GENSCAN00000011147	NorthernBobwhite_ScaffoldedDeNovo_contig_406	452595
GENSCAN00000011144	NorthernBobwhite_ScaffoldedDeNovo_contig_406	456886
GENSCAN00000011170	NorthernBobwhite_ScaffoldedDeNovo_contig_406	484298
GENSCAN00000011138	NorthernBobwhite_ScaffoldedDeNovo_contig_406	486739
GENSCAN00000015236	NorthernBobwhite_ScaffoldedDeNovo_contig_409	26356
GENSCAN00000028177	NorthernBobwhite_ScaffoldedDeNovo_contig_410	8561
GENSCAN00000028190	NorthernBobwhite_ScaffoldedDeNovo_contig_410	53168
GENSCAN00000040056	NorthernBobwhite_ScaffoldedDeNovo_contig_410	87630
GENSCAN00000040065	NorthernBobwhite_ScaffoldedDeNovo_contig_410	101687
GENSCAN00000040050	NorthernBobwhite_ScaffoldedDeNovo_contig_410	117248
GENSCAN00000040047	NorthernBobwhite_ScaffoldedDeNovo_contig_410	149297
GENSCAN00000031240	NorthernBobwhite_ScaffoldedDeNovo_contig_411	10261
GENSCAN00000005072	NorthernBobwhite_ScaffoldedDeNovo_contig_413	5527
GENSCAN00000021944	NorthernBobwhite_ScaffoldedDeNovo_contig_414	2571
GENSCAN00000025877	NorthernBobwhite_ScaffoldedDeNovo_contig_415	8488
GENSCAN00000025873	NorthernBobwhite_ScaffoldedDeNovo_contig_415	23942
GENSCAN00000025870	NorthernBobwhite_ScaffoldedDeNovo_contig_415	45928
GENSCAN00000017103	NorthernBobwhite_ScaffoldedDeNovo_contig_416	12387
GENSCAN00000023013	NorthernBobwhite_ScaffoldedDeNovo_contig_416	37868
GENSCAN00000000753	NorthernBobwhite_ScaffoldedDeNovo_contig_417	5908
GENSCAN00000035171	NorthernBobwhite_ScaffoldedDeNovo_contig_418	4629
GENSCAN00000035165	NorthernBobwhite_ScaffoldedDeNovo_contig_418	33070
GENSCAN00000035193	NorthernBobwhite_ScaffoldedDeNovo_contig_418	45960
GENSCAN00000035157	NorthernBobwhite_ScaffoldedDeNovo_contig_418	78448
GENSCAN00000035194	NorthernBobwhite_ScaffoldedDeNovo_contig_418	86663
GENSCAN00000026661	NorthernBobwhite_ScaffoldedDeNovo_contig_419	21179
GENSCAN00000026671	NorthernBobwhite_ScaffoldedDeNovo_contig_419	28254
GENSCAN00000026688	NorthernBobwhite_ScaffoldedDeNovo_contig_419	89215
GENSCAN00000026681	NorthernBobwhite_ScaffoldedDeNovo_contig_419	119968
GENSCAN00000028009	NorthernBobwhite_ScaffoldedDeNovo_contig_419	127426
GENSCAN00000019500	NorthernBobwhite_ScaffoldedDeNovo_contig_419	147459
GENSCAN00000026687	NorthernBobwhite_ScaffoldedDeNovo_contig_419	147459
GENSCAN00000028495	NorthernBobwhite_ScaffoldedDeNovo_contig_419	180016
GENSCAN00000026644	NorthernBobwhite_ScaffoldedDeNovo_contig_419	209876
GENSCAN00000020676	NorthernBobwhite_ScaffoldedDeNovo_contig_419	225674
GENSCAN00000017419	NorthernBobwhite_ScaffoldedDeNovo_contig_419	272956
GENSCAN00000026670	NorthernBobwhite_ScaffoldedDeNovo_contig_419	290507
GENSCAN00000007894	NorthernBobwhite_ScaffoldedDeNovo_contig_419	291916
GENSCAN00000009636	NorthernBobwhite_ScaffoldedDeNovo_contig_419	298271
GENSCAN00000026652	NorthernBobwhite_ScaffoldedDeNovo_contig_419	307561
GENSCAN00000021473	NorthernBobwhite_ScaffoldedDeNovo_contig_421	12282
GENSCAN00000039548	NorthernBobwhite_ScaffoldedDeNovo_contig_424	4089
GENSCAN00000039520	NorthernBobwhite_ScaffoldedDeNovo_contig_424	52489
GENSCAN00000039537	NorthernBobwhite_ScaffoldedDeNovo_contig_424	73351
GENSCAN00000039522	NorthernBobwhite_ScaffoldedDeNovo_contig_424	115833
GENSCAN00000008509	NorthernBobwhite_ScaffoldedDeNovo_contig_424	146901
GENSCAN00000008507	NorthernBobwhite_ScaffoldedDeNovo_contig_424	151423
GENSCAN00000017263	NorthernBobwhite_ScaffoldedDeNovo_contig_426	8413
GENSCAN00000017260	NorthernBobwhite_ScaffoldedDeNovo_contig_426	56313
GENSCAN00000035467	NorthernBobwhite_ScaffoldedDeNovo_contig_427	27649
GENSCAN00000005521	NorthernBobwhite_ScaffoldedDeNovo_contig_431	14038
GENSCAN00000005538	NorthernBobwhite_ScaffoldedDeNovo_contig_431	23733
GENSCAN00000005503	NorthernBobwhite_ScaffoldedDeNovo_contig_431	33173
GENSCAN00000005502	NorthernBobwhite_ScaffoldedDeNovo_contig_431	68706
GENSCAN00000016887	NorthernBobwhite_ScaffoldedDeNovo_contig_433	2249
GENSCAN00000016891	NorthernBobwhite_ScaffoldedDeNovo_contig_433	42241
GENSCAN00000016858	NorthernBobwhite_ScaffoldedDeNovo_contig_433	44780
GENSCAN00000016840	NorthernBobwhite_ScaffoldedDeNovo_contig_433	58233
GENSCAN00000016884	NorthernBobwhite_ScaffoldedDeNovo_contig_433	75536
GENSCAN00000016895	NorthernBobwhite_ScaffoldedDeNovo_contig_433	99215
GENSCAN00000022259	NorthernBobwhite_ScaffoldedDeNovo_contig_434	23058
GENSCAN00000022260	NorthernBobwhite_ScaffoldedDeNovo_contig_434	42082
GENSCAN00000024540	NorthernBobwhite_ScaffoldedDeNovo_contig_435	5633
GENSCAN00000029922	NorthernBobwhite_ScaffoldedDeNovo_contig_438	53445
GENSCAN00000029932	NorthernBobwhite_ScaffoldedDeNovo_contig_438	54566
GENSCAN00000029919	NorthernBobwhite_ScaffoldedDeNovo_contig_438	81579
GENSCAN00000006371	NorthernBobwhite_ScaffoldedDeNovo_contig_439	37583
GENSCAN00000006377	NorthernBobwhite_ScaffoldedDeNovo_contig_439	74972
GENSCAN00000016725	NorthernBobwhite_ScaffoldedDeNovo_contig_439	100224
GENSCAN00000016735	NorthernBobwhite_ScaffoldedDeNovo_contig_439	131537
GENSCAN00000016739	NorthernBobwhite_ScaffoldedDeNovo_contig_439	143323
GENSCAN00000016741	NorthernBobwhite_ScaffoldedDeNovo_contig_439	178627
GENSCAN00000009891	NorthernBobwhite_ScaffoldedDeNovo_contig_441	604
GENSCAN00000009893	NorthernBobwhite_ScaffoldedDeNovo_contig_441	52689
GENSCAN00000009889	NorthernBobwhite_ScaffoldedDeNovo_contig_441	78260
GENSCAN00000028151	NorthernBobwhite_ScaffoldedDeNovo_contig_449	27072
GENSCAN00000028147	NorthernBobwhite_ScaffoldedDeNovo_contig_449	91968
GENSCAN00000027652	NorthernBobwhite_ScaffoldedDeNovo_contig_451	355
GENSCAN00000027667	NorthernBobwhite_ScaffoldedDeNovo_contig_451	7081
GENSCAN00000019363	NorthernBobwhite_ScaffoldedDeNovo_contig_451	14902
GENSCAN00000027688	NorthernBobwhite_ScaffoldedDeNovo_contig_451	40614
GENSCAN00000008655	NorthernBobwhite_ScaffoldedDeNovo_contig_452	8141
GENSCAN00000008639	NorthernBobwhite_ScaffoldedDeNovo_contig_452	51348
GENSCAN00000008646	NorthernBobwhite_ScaffoldedDeNovo_contig_452	81485
GENSCAN00000008636	NorthernBobwhite_ScaffoldedDeNovo_contig_452	84804
GENSCAN00000025547	NorthernBobwhite_ScaffoldedDeNovo_contig_454	11172
GENSCAN00000026849	NorthernBobwhite_ScaffoldedDeNovo_contig_455	4561
GENSCAN00000026852	NorthernBobwhite_ScaffoldedDeNovo_contig_455	16077
GENSCAN00000026812	NorthernBobwhite_ScaffoldedDeNovo_contig_455	56613
GENSCAN00000026851	NorthernBobwhite_ScaffoldedDeNovo_contig_455	63805
GENSCAN00000026792	NorthernBobwhite_ScaffoldedDeNovo_contig_455	102955
GENSCAN00000026811	NorthernBobwhite_ScaffoldedDeNovo_contig_455	163933
GENSCAN00000026830	NorthernBobwhite_ScaffoldedDeNovo_contig_455	180946
GENSCAN00000012207	NorthernBobwhite_ScaffoldedDeNovo_contig_456	1873
GENSCAN00000012211	NorthernBobwhite_ScaffoldedDeNovo_contig_456	62594
GENSCAN00000012226	NorthernBobwhite_ScaffoldedDeNovo_contig_456	67824
GENSCAN00000012204	NorthernBobwhite_ScaffoldedDeNovo_contig_456	76322
GENSCAN00000012200	NorthernBobwhite_ScaffoldedDeNovo_contig_456	80228
GENSCAN00000012225	NorthernBobwhite_ScaffoldedDeNovo_contig_456	83606
GENSCAN00000012230	NorthernBobwhite_ScaffoldedDeNovo_contig_456	85184
GENSCAN00000012955	NorthernBobwhite_ScaffoldedDeNovo_contig_457	7884
GENSCAN00000017882	NorthernBobwhite_ScaffoldedDeNovo_contig_458	10116
GENSCAN00000017896	NorthernBobwhite_ScaffoldedDeNovo_contig_458	25402
GENSCAN00000017886	NorthernBobwhite_ScaffoldedDeNovo_contig_458	75149
GENSCAN00000017898	NorthernBobwhite_ScaffoldedDeNovo_contig_458	95241
GENSCAN00000017879	NorthernBobwhite_ScaffoldedDeNovo_contig_458	104693
GENSCAN00000017875	NorthernBobwhite_ScaffoldedDeNovo_contig_458	122887
GENSCAN00000017897	NorthernBobwhite_ScaffoldedDeNovo_contig_458	125176
GENSCAN00000017902	NorthernBobwhite_ScaffoldedDeNovo_contig_458	152410
GENSCAN00000017873	NorthernBobwhite_ScaffoldedDeNovo_contig_458	173186
GENSCAN00000017892	NorthernBobwhite_ScaffoldedDeNovo_contig_458	207384
GENSCAN00000017894	NorthernBobwhite_ScaffoldedDeNovo_contig_458	215955
GENSCAN00000017877	NorthernBobwhite_ScaffoldedDeNovo_contig_458	236878
GENSCAN00000017890	NorthernBobwhite_ScaffoldedDeNovo_contig_458	239867
GENSCAN00000001738	NorthernBobwhite_ScaffoldedDeNovo_contig_459	15523
GENSCAN00000001124	NorthernBobwhite_ScaffoldedDeNovo_contig_461	1387
GENSCAN00000001133	NorthernBobwhite_ScaffoldedDeNovo_contig_461	4870
GENSCAN00000001168	NorthernBobwhite_ScaffoldedDeNovo_contig_461	12404
GENSCAN00000001142	NorthernBobwhite_ScaffoldedDeNovo_contig_461	28387
GENSCAN00000001150	NorthernBobwhite_ScaffoldedDeNovo_contig_461	43216
GENSCAN00000001167	NorthernBobwhite_ScaffoldedDeNovo_contig_461	53381
GENSCAN00000001147	NorthernBobwhite_ScaffoldedDeNovo_contig_461	63329
GENSCAN00000001145	NorthernBobwhite_ScaffoldedDeNovo_contig_461	68492
GENSCAN00000010817	NorthernBobwhite_ScaffoldedDeNovo_contig_462	43141
GENSCAN00000010818	NorthernBobwhite_ScaffoldedDeNovo_contig_462	46946
GENSCAN00000009796	NorthernBobwhite_ScaffoldedDeNovo_contig_463	538
GENSCAN00000009795	NorthernBobwhite_ScaffoldedDeNovo_contig_463	538
GENSCAN00000010524	NorthernBobwhite_ScaffoldedDeNovo_contig_463	1124
GENSCAN00000006615	NorthernBobwhite_ScaffoldedDeNovo_contig_463	1161
GENSCAN00000009798	NorthernBobwhite_ScaffoldedDeNovo_contig_463	1161
GENSCAN00000009794	NorthernBobwhite_ScaffoldedDeNovo_contig_463	1599
GENSCAN00000033519	NorthernBobwhite_ScaffoldedDeNovo_contig_467	9152
GENSCAN00000033527	NorthernBobwhite_ScaffoldedDeNovo_contig_467	48975
GENSCAN00000004482	NorthernBobwhite_ScaffoldedDeNovo_contig_468	5977
GENSCAN00000004483	NorthernBobwhite_ScaffoldedDeNovo_contig_468	10015
GENSCAN00000004489	NorthernBobwhite_ScaffoldedDeNovo_contig_468	80062
GENSCAN00000009580	NorthernBobwhite_ScaffoldedDeNovo_contig_470	8331
GENSCAN00000026497	NorthernBobwhite_ScaffoldedDeNovo_contig_471	7306
GENSCAN00000026511	NorthernBobwhite_ScaffoldedDeNovo_contig_471	36603
GENSCAN00000026513	NorthernBobwhite_ScaffoldedDeNovo_contig_471	50934
GENSCAN00000021101	NorthernBobwhite_ScaffoldedDeNovo_contig_471	68551
GENSCAN00000036245	NorthernBobwhite_ScaffoldedDeNovo_contig_473	48667
GENSCAN00000028558	NorthernBobwhite_ScaffoldedDeNovo_contig_476	11
GENSCAN00000028574	NorthernBobwhite_ScaffoldedDeNovo_contig_476	11
GENSCAN00000000275	NorthernBobwhite_ScaffoldedDeNovo_contig_476	9300
GENSCAN00000028566	NorthernBobwhite_ScaffoldedDeNovo_contig_476	9300
GENSCAN00000028571	NorthernBobwhite_ScaffoldedDeNovo_contig_476	9300
GENSCAN00000028577	NorthernBobwhite_ScaffoldedDeNovo_contig_476	9300
GENSCAN00000028564	NorthernBobwhite_ScaffoldedDeNovo_contig_476	37618
GENSCAN00000000277	NorthernBobwhite_ScaffoldedDeNovo_contig_476	41628
GENSCAN00000028559	NorthernBobwhite_ScaffoldedDeNovo_contig_476	41628
GENSCAN00000028579	NorthernBobwhite_ScaffoldedDeNovo_contig_476	41628
GENSCAN00000030183	NorthernBobwhite_ScaffoldedDeNovo_contig_478	67302
GENSCAN00000027237	NorthernBobwhite_ScaffoldedDeNovo_contig_479	48092
GENSCAN00000027255	NorthernBobwhite_ScaffoldedDeNovo_contig_479	48092
GENSCAN00000036989	NorthernBobwhite_ScaffoldedDeNovo_contig_479	48092
GENSCAN00000022402	NorthernBobwhite_ScaffoldedDeNovo_contig_479	48114
GENSCAN00000022397	NorthernBobwhite_ScaffoldedDeNovo_contig_479	48174
GENSCAN00000022410	NorthernBobwhite_ScaffoldedDeNovo_contig_479	48174
GENSCAN00000016209	NorthernBobwhite_ScaffoldedDeNovo_contig_479	48225
GENSCAN00000036998	NorthernBobwhite_ScaffoldedDeNovo_contig_479	48231
GENSCAN00000022401	NorthernBobwhite_ScaffoldedDeNovo_contig_479	48334
GENSCAN00000039378	NorthernBobwhite_ScaffoldedDeNovo_contig_479	48468
GENSCAN00000010932	NorthernBobwhite_ScaffoldedDeNovo_contig_479	48843
GENSCAN00000033582	NorthernBobwhite_ScaffoldedDeNovo_contig_479	48843
GENSCAN00000021566	NorthernBobwhite_ScaffoldedDeNovo_contig_480	26418
GENSCAN00000022264	NorthernBobwhite_ScaffoldedDeNovo_contig_481	14562
GENSCAN00000008137	NorthernBobwhite_ScaffoldedDeNovo_contig_482	15244
GENSCAN00000025241	NorthernBobwhite_ScaffoldedDeNovo_contig_483	4138
GENSCAN00000025199	NorthernBobwhite_ScaffoldedDeNovo_contig_483	15084
GENSCAN00000025210	NorthernBobwhite_ScaffoldedDeNovo_contig_483	22395
GENSCAN00000025223	NorthernBobwhite_ScaffoldedDeNovo_contig_483	45576
GENSCAN00000003886	NorthernBobwhite_ScaffoldedDeNovo_contig_485	36796
GENSCAN00000029502	NorthernBobwhite_ScaffoldedDeNovo_contig_486	5629
GENSCAN00000029493	NorthernBobwhite_ScaffoldedDeNovo_contig_486	11633
GENSCAN00000029483	NorthernBobwhite_ScaffoldedDeNovo_contig_486	25860
GENSCAN00000039503	NorthernBobwhite_ScaffoldedDeNovo_contig_488	917
GENSCAN00000014441	NorthernBobwhite_ScaffoldedDeNovo_contig_489	295
GENSCAN00000002102	NorthernBobwhite_ScaffoldedDeNovo_contig_490	2682
GENSCAN00000002119	NorthernBobwhite_ScaffoldedDeNovo_contig_490	12261
GENSCAN00000002131	NorthernBobwhite_ScaffoldedDeNovo_contig_490	35095
GENSCAN00000002092	NorthernBobwhite_ScaffoldedDeNovo_contig_490	51584
GENSCAN00000002117	NorthernBobwhite_ScaffoldedDeNovo_contig_490	67037
GENSCAN00000002087	NorthernBobwhite_ScaffoldedDeNovo_contig_490	76322
GENSCAN00000002083	NorthernBobwhite_ScaffoldedDeNovo_contig_490	88837
GENSCAN00000030528	NorthernBobwhite_ScaffoldedDeNovo_contig_495	16001
GENSCAN00000030548	NorthernBobwhite_ScaffoldedDeNovo_contig_495	29653
GENSCAN00000016340	NorthernBobwhite_ScaffoldedDeNovo_contig_496	2439
GENSCAN00000034779	NorthernBobwhite_ScaffoldedDeNovo_contig_497	7645
GENSCAN00000034770	NorthernBobwhite_ScaffoldedDeNovo_contig_497	48606
GENSCAN00000034764	NorthernBobwhite_ScaffoldedDeNovo_contig_497	50954
GENSCAN00000034790	NorthernBobwhite_ScaffoldedDeNovo_contig_497	102043
GENSCAN00000034784	NorthernBobwhite_ScaffoldedDeNovo_contig_497	117131
GENSCAN00000034766	NorthernBobwhite_ScaffoldedDeNovo_contig_497	130411
GENSCAN00000034769	NorthernBobwhite_ScaffoldedDeNovo_contig_497	136277
GENSCAN00000022671	NorthernBobwhite_ScaffoldedDeNovo_contig_499	52315
GENSCAN00000039060	NorthernBobwhite_ScaffoldedDeNovo_contig_500	21904
GENSCAN00000036338	NorthernBobwhite_ScaffoldedDeNovo_contig_501	98503
GENSCAN00000013751	NorthernBobwhite_ScaffoldedDeNovo_contig_504	4517
GENSCAN00000033547	NorthernBobwhite_ScaffoldedDeNovo_contig_506	27052
GENSCAN00000031426	NorthernBobwhite_ScaffoldedDeNovo_contig_506	38830
GENSCAN00000035696	NorthernBobwhite_ScaffoldedDeNovo_contig_507	981
GENSCAN00000036737	NorthernBobwhite_ScaffoldedDeNovo_contig_508	56873
GENSCAN00000011254	NorthernBobwhite_ScaffoldedDeNovo_contig_509	6216
GENSCAN00000008201	NorthernBobwhite_ScaffoldedDeNovo_contig_510	45240
GENSCAN00000023550	NorthernBobwhite_ScaffoldedDeNovo_contig_511	2555
GENSCAN00000023542	NorthernBobwhite_ScaffoldedDeNovo_contig_511	17459
GENSCAN00000007401	NorthernBobwhite_ScaffoldedDeNovo_contig_512	37187
GENSCAN00000007432	NorthernBobwhite_ScaffoldedDeNovo_contig_512	50878
GENSCAN00000007423	NorthernBobwhite_ScaffoldedDeNovo_contig_512	62963
GENSCAN00000023272	NorthernBobwhite_ScaffoldedDeNovo_contig_517	59794
GENSCAN00000004665	NorthernBobwhite_ScaffoldedDeNovo_contig_518	45846
GENSCAN00000020850	NorthernBobwhite_ScaffoldedDeNovo_contig_520	49808
GENSCAN00000018456	NorthernBobwhite_ScaffoldedDeNovo_contig_521	20224
GENSCAN00000022490	NorthernBobwhite_ScaffoldedDeNovo_contig_526	16323
GENSCAN00000006534	NorthernBobwhite_ScaffoldedDeNovo_contig_527	45337
GENSCAN00000006529	NorthernBobwhite_ScaffoldedDeNovo_contig_527	47681
GENSCAN00000006514	NorthernBobwhite_ScaffoldedDeNovo_contig_527	49418
GENSCAN00000006517	NorthernBobwhite_ScaffoldedDeNovo_contig_527	53065
GENSCAN00000011823	NorthernBobwhite_ScaffoldedDeNovo_contig_528	22874
GENSCAN00000011827	NorthernBobwhite_ScaffoldedDeNovo_contig_528	32425
GENSCAN00000011815	NorthernBobwhite_ScaffoldedDeNovo_contig_528	42077
GENSCAN00000011814	NorthernBobwhite_ScaffoldedDeNovo_contig_528	75836
GENSCAN00000011813	NorthernBobwhite_ScaffoldedDeNovo_contig_528	84259
GENSCAN00000002814	NorthernBobwhite_ScaffoldedDeNovo_contig_529	65170
GENSCAN00000020847	NorthernBobwhite_ScaffoldedDeNovo_contig_530	25881
GENSCAN00000040228	NorthernBobwhite_ScaffoldedDeNovo_contig_532	73338
GENSCAN00000040224	NorthernBobwhite_ScaffoldedDeNovo_contig_532	86151
GENSCAN00000022550	NorthernBobwhite_ScaffoldedDeNovo_contig_533	21049
GENSCAN00000022548	NorthernBobwhite_ScaffoldedDeNovo_contig_533	29799
GENSCAN00000022560	NorthernBobwhite_ScaffoldedDeNovo_contig_533	36000
GENSCAN00000039969	NorthernBobwhite_ScaffoldedDeNovo_contig_535	404
GENSCAN00000040004	NorthernBobwhite_ScaffoldedDeNovo_contig_535	30648
GENSCAN00000040001	NorthernBobwhite_ScaffoldedDeNovo_contig_535	37188
GENSCAN00000039984	NorthernBobwhite_ScaffoldedDeNovo_contig_535	135077
GENSCAN00000039986	NorthernBobwhite_ScaffoldedDeNovo_contig_535	157684
GENSCAN00000020640	NorthernBobwhite_ScaffoldedDeNovo_contig_535	164288
GENSCAN00000026479	NorthernBobwhite_ScaffoldedDeNovo_contig_536	1888
GENSCAN00000026474	NorthernBobwhite_ScaffoldedDeNovo_contig_536	47234
GENSCAN00000026485	NorthernBobwhite_ScaffoldedDeNovo_contig_536	57001
GENSCAN00000026481	NorthernBobwhite_ScaffoldedDeNovo_contig_536	68185
GENSCAN00000004579	NorthernBobwhite_ScaffoldedDeNovo_contig_536	69046
GENSCAN00000014391	NorthernBobwhite_ScaffoldedDeNovo_contig_538	7143
GENSCAN00000022123	NorthernBobwhite_ScaffoldedDeNovo_contig_539	17583
GENSCAN00000029604	NorthernBobwhite_ScaffoldedDeNovo_contig_544	8275
GENSCAN00000029595	NorthernBobwhite_ScaffoldedDeNovo_contig_544	35177
GENSCAN00000037981	NorthernBobwhite_ScaffoldedDeNovo_contig_544	48148
GENSCAN00000037290	NorthernBobwhite_ScaffoldedDeNovo_contig_547	2152
GENSCAN00000024365	NorthernBobwhite_ScaffoldedDeNovo_contig_547	16441
GENSCAN00000023461	NorthernBobwhite_ScaffoldedDeNovo_contig_548	374
GENSCAN00000038947	NorthernBobwhite_ScaffoldedDeNovo_contig_549	23562
GENSCAN00000007137	NorthernBobwhite_ScaffoldedDeNovo_contig_552	62816
GENSCAN00000038902	NorthernBobwhite_ScaffoldedDeNovo_contig_553	24142
GENSCAN00000038895	NorthernBobwhite_ScaffoldedDeNovo_contig_553	50145
GENSCAN00000007692	NorthernBobwhite_ScaffoldedDeNovo_contig_556	3251
GENSCAN00000020694	NorthernBobwhite_ScaffoldedDeNovo_contig_556	7595
GENSCAN00000031592	NorthernBobwhite_ScaffoldedDeNovo_contig_557	2793
GENSCAN00000027079	NorthernBobwhite_ScaffoldedDeNovo_contig_559	35812
GENSCAN00000036834	NorthernBobwhite_ScaffoldedDeNovo_contig_565	2073
GENSCAN00000012802	NorthernBobwhite_ScaffoldedDeNovo_contig_566	32139
GENSCAN00000012821	NorthernBobwhite_ScaffoldedDeNovo_contig_566	33767
GENSCAN00000023808	NorthernBobwhite_ScaffoldedDeNovo_contig_567	32248
GENSCAN00000023827	NorthernBobwhite_ScaffoldedDeNovo_contig_567	56936
GENSCAN00000023831	NorthernBobwhite_ScaffoldedDeNovo_contig_567	105479
GENSCAN00000023834	NorthernBobwhite_ScaffoldedDeNovo_contig_567	115847
GENSCAN00000023832	NorthernBobwhite_ScaffoldedDeNovo_contig_567	118129
GENSCAN00000017262	NorthernBobwhite_ScaffoldedDeNovo_contig_570	16534
GENSCAN00000017240	NorthernBobwhite_ScaffoldedDeNovo_contig_570	75924
GENSCAN00000017248	NorthernBobwhite_ScaffoldedDeNovo_contig_570	97857
GENSCAN00000017245	NorthernBobwhite_ScaffoldedDeNovo_contig_570	112433
GENSCAN00000029975	NorthernBobwhite_ScaffoldedDeNovo_contig_572	22547
GENSCAN00000028700	NorthernBobwhite_ScaffoldedDeNovo_contig_576	5910
GENSCAN00000028697	NorthernBobwhite_ScaffoldedDeNovo_contig_576	8194
GENSCAN00000037079	NorthernBobwhite_ScaffoldedDeNovo_contig_577	2917
GENSCAN00000037056	NorthernBobwhite_ScaffoldedDeNovo_contig_577	23961
GENSCAN00000037062	NorthernBobwhite_ScaffoldedDeNovo_contig_577	48310
GENSCAN00000036218	NorthernBobwhite_ScaffoldedDeNovo_contig_578	7359
GENSCAN00000026809	NorthernBobwhite_ScaffoldedDeNovo_contig_583	13744
GENSCAN00000026814	NorthernBobwhite_ScaffoldedDeNovo_contig_583	36508
GENSCAN00000025106	NorthernBobwhite_ScaffoldedDeNovo_contig_584	241577
GENSCAN00000022748	NorthernBobwhite_ScaffoldedDeNovo_contig_584	296079
GENSCAN00000022770	NorthernBobwhite_ScaffoldedDeNovo_contig_584	325432
GENSCAN00000007518	NorthernBobwhite_ScaffoldedDeNovo_contig_585	384
GENSCAN00000007525	NorthernBobwhite_ScaffoldedDeNovo_contig_585	45563
GENSCAN00000007517	NorthernBobwhite_ScaffoldedDeNovo_contig_585	54308
GENSCAN00000007496	NorthernBobwhite_ScaffoldedDeNovo_contig_585	133988
GENSCAN00000007522	NorthernBobwhite_ScaffoldedDeNovo_contig_585	142173
GENSCAN00000007519	NorthernBobwhite_ScaffoldedDeNovo_contig_585	208131
GENSCAN00000007510	NorthernBobwhite_ScaffoldedDeNovo_contig_585	213200
GENSCAN00000007512	NorthernBobwhite_ScaffoldedDeNovo_contig_585	220423
GENSCAN00000007520	NorthernBobwhite_ScaffoldedDeNovo_contig_585	233738
GENSCAN00000032173	NorthernBobwhite_ScaffoldedDeNovo_contig_586	21300
GENSCAN00000032170	NorthernBobwhite_ScaffoldedDeNovo_contig_586	64811
GENSCAN00000032191	NorthernBobwhite_ScaffoldedDeNovo_contig_586	66953
GENSCAN00000032192	NorthernBobwhite_ScaffoldedDeNovo_contig_586	87115
GENSCAN00000032164	NorthernBobwhite_ScaffoldedDeNovo_contig_586	101364
GENSCAN00000034297	NorthernBobwhite_ScaffoldedDeNovo_contig_588	6199
GENSCAN00000024806	NorthernBobwhite_ScaffoldedDeNovo_contig_589	1138
GENSCAN00000024819	NorthernBobwhite_ScaffoldedDeNovo_contig_589	70183
GENSCAN00000024822	NorthernBobwhite_ScaffoldedDeNovo_contig_589	71752
GENSCAN00000024827	NorthernBobwhite_ScaffoldedDeNovo_contig_589	73128
GENSCAN00000024807	NorthernBobwhite_ScaffoldedDeNovo_contig_589	156211
GENSCAN00000013985	NorthernBobwhite_ScaffoldedDeNovo_contig_590	22214
GENSCAN00000004572	NorthernBobwhite_ScaffoldedDeNovo_contig_591	5841
GENSCAN00000033407	NorthernBobwhite_ScaffoldedDeNovo_contig_591	5865
GENSCAN00000035284	NorthernBobwhite_ScaffoldedDeNovo_contig_591	5867
GENSCAN00000035092	NorthernBobwhite_ScaffoldedDeNovo_contig_592	54589
GENSCAN00000035086	NorthernBobwhite_ScaffoldedDeNovo_contig_592	88275
GENSCAN00000001217	NorthernBobwhite_ScaffoldedDeNovo_contig_594	16215
GENSCAN00000001241	NorthernBobwhite_ScaffoldedDeNovo_contig_594	21511
GENSCAN00000015333	NorthernBobwhite_ScaffoldedDeNovo_contig_595	9632
GENSCAN00000015293	NorthernBobwhite_ScaffoldedDeNovo_contig_595	44547
GENSCAN00000015299	NorthernBobwhite_ScaffoldedDeNovo_contig_595	45123
GENSCAN00000015305	NorthernBobwhite_ScaffoldedDeNovo_contig_595	80862
GENSCAN00000023512	NorthernBobwhite_ScaffoldedDeNovo_contig_597	5667
GENSCAN00000023488	NorthernBobwhite_ScaffoldedDeNovo_contig_597	18475
GENSCAN00000023473	NorthernBobwhite_ScaffoldedDeNovo_contig_597	72162
GENSCAN00000002213	NorthernBobwhite_ScaffoldedDeNovo_contig_600	8954
GENSCAN00000002228	NorthernBobwhite_ScaffoldedDeNovo_contig_600	27839
GENSCAN00000030721	NorthernBobwhite_ScaffoldedDeNovo_contig_600	43216
GENSCAN00000004957	NorthernBobwhite_ScaffoldedDeNovo_contig_601	44420
GENSCAN00000004965	NorthernBobwhite_ScaffoldedDeNovo_contig_601	52439
GENSCAN00000012849	NorthernBobwhite_ScaffoldedDeNovo_contig_601	66815
GENSCAN00000004962	NorthernBobwhite_ScaffoldedDeNovo_contig_601	71351
GENSCAN00000004929	NorthernBobwhite_ScaffoldedDeNovo_contig_601	93633
GENSCAN00000004945	NorthernBobwhite_ScaffoldedDeNovo_contig_601	97159
GENSCAN00000004931	NorthernBobwhite_ScaffoldedDeNovo_contig_601	102522
GENSCAN00000011230	NorthernBobwhite_ScaffoldedDeNovo_contig_601	111681
GENSCAN00000016918	NorthernBobwhite_ScaffoldedDeNovo_contig_602	11362
GENSCAN00000024889	NorthernBobwhite_ScaffoldedDeNovo_contig_603	123
GENSCAN00000024892	NorthernBobwhite_ScaffoldedDeNovo_contig_603	11338
GENSCAN00000039276	NorthernBobwhite_ScaffoldedDeNovo_contig_604	1865
GENSCAN00000039341	NorthernBobwhite_ScaffoldedDeNovo_contig_604	1865
GENSCAN00000039302	NorthernBobwhite_ScaffoldedDeNovo_contig_604	1865
GENSCAN00000039333	NorthernBobwhite_ScaffoldedDeNovo_contig_604	1865
GENSCAN00000039271	NorthernBobwhite_ScaffoldedDeNovo_contig_604	1871
GENSCAN00000000406	NorthernBobwhite_ScaffoldedDeNovo_contig_604	1914
GENSCAN00000012090	NorthernBobwhite_ScaffoldedDeNovo_contig_607	57071
GENSCAN00000033765	NorthernBobwhite_ScaffoldedDeNovo_contig_608	39029
GENSCAN00000033754	NorthernBobwhite_ScaffoldedDeNovo_contig_608	49040
GENSCAN00000033763	NorthernBobwhite_ScaffoldedDeNovo_contig_608	89946
GENSCAN00000033757	NorthernBobwhite_ScaffoldedDeNovo_contig_608	112846
GENSCAN00000033751	NorthernBobwhite_ScaffoldedDeNovo_contig_608	138006
GENSCAN00000017719	NorthernBobwhite_ScaffoldedDeNovo_contig_609	7461
GENSCAN00000017723	NorthernBobwhite_ScaffoldedDeNovo_contig_609	26500
GENSCAN00000009485	NorthernBobwhite_ScaffoldedDeNovo_contig_609	40913
GENSCAN00000009483	NorthernBobwhite_ScaffoldedDeNovo_contig_609	75522
GENSCAN00000009492	NorthernBobwhite_ScaffoldedDeNovo_contig_609	175451
GENSCAN00000033338	NorthernBobwhite_ScaffoldedDeNovo_contig_610	6112
GENSCAN00000033391	NorthernBobwhite_ScaffoldedDeNovo_contig_610	21795
GENSCAN00000033322	NorthernBobwhite_ScaffoldedDeNovo_contig_610	55577
GENSCAN00000024663	NorthernBobwhite_ScaffoldedDeNovo_contig_612	3
GENSCAN00000024639	NorthernBobwhite_ScaffoldedDeNovo_contig_612	4317
GENSCAN00000039370	NorthernBobwhite_ScaffoldedDeNovo_contig_613	11345
GENSCAN00000039382	NorthernBobwhite_ScaffoldedDeNovo_contig_613	30111
GENSCAN00000005950	NorthernBobwhite_ScaffoldedDeNovo_contig_614	30380
GENSCAN00000031254	NorthernBobwhite_ScaffoldedDeNovo_contig_617	59857
GENSCAN00000031223	NorthernBobwhite_ScaffoldedDeNovo_contig_617	80609
GENSCAN00000031563	NorthernBobwhite_ScaffoldedDeNovo_contig_617	85765
GENSCAN00000020411	NorthernBobwhite_ScaffoldedDeNovo_contig_618	29369
GENSCAN00000020421	NorthernBobwhite_ScaffoldedDeNovo_contig_618	37460
GENSCAN00000020409	NorthernBobwhite_ScaffoldedDeNovo_contig_618	46958
GENSCAN00000023684	NorthernBobwhite_ScaffoldedDeNovo_contig_619	108619
GENSCAN00000023694	NorthernBobwhite_ScaffoldedDeNovo_contig_619	120926
GENSCAN00000023703	NorthernBobwhite_ScaffoldedDeNovo_contig_619	153191
GENSCAN00000023696	NorthernBobwhite_ScaffoldedDeNovo_contig_619	162747
GENSCAN00000023705	NorthernBobwhite_ScaffoldedDeNovo_contig_619	176043
GENSCAN00000023691	NorthernBobwhite_ScaffoldedDeNovo_contig_619	191415
GENSCAN00000001305	NorthernBobwhite_ScaffoldedDeNovo_contig_621	20969
GENSCAN00000001313	NorthernBobwhite_ScaffoldedDeNovo_contig_621	28731
GENSCAN00000001318	NorthernBobwhite_ScaffoldedDeNovo_contig_621	34703
GENSCAN00000001310	NorthernBobwhite_ScaffoldedDeNovo_contig_621	46613
GENSCAN00000024244	NorthernBobwhite_ScaffoldedDeNovo_contig_624	86897
GENSCAN00000024281	NorthernBobwhite_ScaffoldedDeNovo_contig_624	100896
GENSCAN00000037588	NorthernBobwhite_ScaffoldedDeNovo_contig_625	21381
GENSCAN00000011755	NorthernBobwhite_ScaffoldedDeNovo_contig_629	91
GENSCAN00000009947	NorthernBobwhite_ScaffoldedDeNovo_contig_630	8539
GENSCAN00000009964	NorthernBobwhite_ScaffoldedDeNovo_contig_630	46937
GENSCAN00000009337	NorthernBobwhite_ScaffoldedDeNovo_contig_631	457
GENSCAN00000009346	NorthernBobwhite_ScaffoldedDeNovo_contig_631	42008
GENSCAN00000009335	NorthernBobwhite_ScaffoldedDeNovo_contig_631	43927
GENSCAN00000009372	NorthernBobwhite_ScaffoldedDeNovo_contig_631	47767
GENSCAN00000009376	NorthernBobwhite_ScaffoldedDeNovo_contig_631	63368
GENSCAN00000009369	NorthernBobwhite_ScaffoldedDeNovo_contig_631	79552
GENSCAN00000035937	NorthernBobwhite_ScaffoldedDeNovo_contig_633	3407
GENSCAN00000038059	NorthernBobwhite_ScaffoldedDeNovo_contig_634	5985
GENSCAN00000030207	NorthernBobwhite_ScaffoldedDeNovo_contig_635	38899
GENSCAN00000030230	NorthernBobwhite_ScaffoldedDeNovo_contig_635	42634
GENSCAN00000036404	NorthernBobwhite_ScaffoldedDeNovo_contig_636	2815
GENSCAN00000036401	NorthernBobwhite_ScaffoldedDeNovo_contig_636	13409
GENSCAN00000036421	NorthernBobwhite_ScaffoldedDeNovo_contig_636	23842
GENSCAN00000036422	NorthernBobwhite_ScaffoldedDeNovo_contig_636	35419
GENSCAN00000007594	NorthernBobwhite_ScaffoldedDeNovo_contig_640	16
GENSCAN00000007595	NorthernBobwhite_ScaffoldedDeNovo_contig_641	25035
GENSCAN00000040516	NorthernBobwhite_ScaffoldedDeNovo_contig_644	19141
GENSCAN00000040515	NorthernBobwhite_ScaffoldedDeNovo_contig_644	22407
GENSCAN00000033043	NorthernBobwhite_ScaffoldedDeNovo_contig_646	7575
GENSCAN00000033036	NorthernBobwhite_ScaffoldedDeNovo_contig_646	74219
GENSCAN00000023572	NorthernBobwhite_ScaffoldedDeNovo_contig_648	4950
GENSCAN00000023600	NorthernBobwhite_ScaffoldedDeNovo_contig_648	18436
GENSCAN00000023578	NorthernBobwhite_ScaffoldedDeNovo_contig_648	40581
GENSCAN00000023581	NorthernBobwhite_ScaffoldedDeNovo_contig_648	45005
GENSCAN00000023583	NorthernBobwhite_ScaffoldedDeNovo_contig_648	58343
GENSCAN00000003689	NorthernBobwhite_ScaffoldedDeNovo_contig_650	69
GENSCAN00000003684	NorthernBobwhite_ScaffoldedDeNovo_contig_650	9192
GENSCAN00000003713	NorthernBobwhite_ScaffoldedDeNovo_contig_650	13444
GENSCAN00000003723	NorthernBobwhite_ScaffoldedDeNovo_contig_650	58547
GENSCAN00000038425	NorthernBobwhite_ScaffoldedDeNovo_contig_652	15656
GENSCAN00000038412	NorthernBobwhite_ScaffoldedDeNovo_contig_652	25399
GENSCAN00000038467	NorthernBobwhite_ScaffoldedDeNovo_contig_652	102721
GENSCAN00000038426	NorthernBobwhite_ScaffoldedDeNovo_contig_652	122841
GENSCAN00000038460	NorthernBobwhite_ScaffoldedDeNovo_contig_652	160898
GENSCAN00000038465	NorthernBobwhite_ScaffoldedDeNovo_contig_652	215222
GENSCAN00000038431	NorthernBobwhite_ScaffoldedDeNovo_contig_652	235269
GENSCAN00000027564	NorthernBobwhite_ScaffoldedDeNovo_contig_655	7821
GENSCAN00000032866	NorthernBobwhite_ScaffoldedDeNovo_contig_656	9687
GENSCAN00000002354	NorthernBobwhite_ScaffoldedDeNovo_contig_657	72979
GENSCAN00000002386	NorthernBobwhite_ScaffoldedDeNovo_contig_657	95571
GENSCAN00000036223	NorthernBobwhite_ScaffoldedDeNovo_contig_658	19047
GENSCAN00000036233	NorthernBobwhite_ScaffoldedDeNovo_contig_658	50193
GENSCAN00000023229	NorthernBobwhite_ScaffoldedDeNovo_contig_659	2808
GENSCAN00000023243	NorthernBobwhite_ScaffoldedDeNovo_contig_659	15099
GENSCAN00000023231	NorthernBobwhite_ScaffoldedDeNovo_contig_659	18395
GENSCAN00000023216	NorthernBobwhite_ScaffoldedDeNovo_contig_659	33516
GENSCAN00000023238	NorthernBobwhite_ScaffoldedDeNovo_contig_659	60672
GENSCAN00000023215	NorthernBobwhite_ScaffoldedDeNovo_contig_659	69558
GENSCAN00000023235	NorthernBobwhite_ScaffoldedDeNovo_contig_659	74925
GENSCAN00000023220	NorthernBobwhite_ScaffoldedDeNovo_contig_659	88786
GENSCAN00000023212	NorthernBobwhite_ScaffoldedDeNovo_contig_659	95701
GENSCAN00000010734	NorthernBobwhite_ScaffoldedDeNovo_contig_659	106847
GENSCAN00000023250	NorthernBobwhite_ScaffoldedDeNovo_contig_659	155972
GENSCAN00000023245	NorthernBobwhite_ScaffoldedDeNovo_contig_659	160897
GENSCAN00000023240	NorthernBobwhite_ScaffoldedDeNovo_contig_659	176086
GENSCAN00000023214	NorthernBobwhite_ScaffoldedDeNovo_contig_659	187545
GENSCAN00000023219	NorthernBobwhite_ScaffoldedDeNovo_contig_659	203106
GENSCAN00000023241	NorthernBobwhite_ScaffoldedDeNovo_contig_659	221911
GENSCAN00000023226	NorthernBobwhite_ScaffoldedDeNovo_contig_659	235466
GENSCAN00000023239	NorthernBobwhite_ScaffoldedDeNovo_contig_659	266420
GENSCAN00000023222	NorthernBobwhite_ScaffoldedDeNovo_contig_659	281680
GENSCAN00000023210	NorthernBobwhite_ScaffoldedDeNovo_contig_659	289749
GENSCAN00000023211	NorthernBobwhite_ScaffoldedDeNovo_contig_659	308924
GENSCAN00000039250	NorthernBobwhite_ScaffoldedDeNovo_contig_661	10
GENSCAN00000014777	NorthernBobwhite_ScaffoldedDeNovo_contig_661	50861
GENSCAN00000039257	NorthernBobwhite_ScaffoldedDeNovo_contig_661	71455
GENSCAN00000021634	NorthernBobwhite_ScaffoldedDeNovo_contig_668	9273
GENSCAN00000014916	NorthernBobwhite_ScaffoldedDeNovo_contig_670	2210
GENSCAN00000014902	NorthernBobwhite_ScaffoldedDeNovo_contig_670	8740
GENSCAN00000014943	NorthernBobwhite_ScaffoldedDeNovo_contig_670	12479
GENSCAN00000014914	NorthernBobwhite_ScaffoldedDeNovo_contig_670	27556
GENSCAN00000014924	NorthernBobwhite_ScaffoldedDeNovo_contig_670	38653
GENSCAN00000014912	NorthernBobwhite_ScaffoldedDeNovo_contig_670	47703
GENSCAN00000014939	NorthernBobwhite_ScaffoldedDeNovo_contig_670	53761
GENSCAN00000014942	NorthernBobwhite_ScaffoldedDeNovo_contig_670	103791
GENSCAN00000039683	NorthernBobwhite_ScaffoldedDeNovo_contig_673	425
GENSCAN00000039690	NorthernBobwhite_ScaffoldedDeNovo_contig_673	21671
GENSCAN00000039641	NorthernBobwhite_ScaffoldedDeNovo_contig_673	31523
GENSCAN00000039640	NorthernBobwhite_ScaffoldedDeNovo_contig_673	37466
GENSCAN00000033913	NorthernBobwhite_ScaffoldedDeNovo_contig_674	31396
GENSCAN00000027809	NorthernBobwhite_ScaffoldedDeNovo_contig_675	14607
GENSCAN00000021807	NorthernBobwhite_ScaffoldedDeNovo_contig_677	26612
GENSCAN00000006962	NorthernBobwhite_ScaffoldedDeNovo_contig_680	14786
GENSCAN00000037263	NorthernBobwhite_ScaffoldedDeNovo_contig_682	4122
GENSCAN00000030966	NorthernBobwhite_ScaffoldedDeNovo_contig_682	5728
GENSCAN00000013363	NorthernBobwhite_ScaffoldedDeNovo_contig_682	9346
GENSCAN00000003080	NorthernBobwhite_ScaffoldedDeNovo_contig_682	12704
GENSCAN00000029888	NorthernBobwhite_ScaffoldedDeNovo_contig_683	7791
GENSCAN00000009510	NorthernBobwhite_ScaffoldedDeNovo_contig_684	5598
GENSCAN00000033118	NorthernBobwhite_ScaffoldedDeNovo_contig_685	7174
GENSCAN00000033130	NorthernBobwhite_ScaffoldedDeNovo_contig_685	9123
GENSCAN00000033133	NorthernBobwhite_ScaffoldedDeNovo_contig_685	44695
GENSCAN00000033115	NorthernBobwhite_ScaffoldedDeNovo_contig_685	50557
GENSCAN00000033112	NorthernBobwhite_ScaffoldedDeNovo_contig_685	94620
GENSCAN00000016274	NorthernBobwhite_ScaffoldedDeNovo_contig_685	122400
GENSCAN00000033131	NorthernBobwhite_ScaffoldedDeNovo_contig_685	129121
GENSCAN00000033135	NorthernBobwhite_ScaffoldedDeNovo_contig_685	132841
GENSCAN00000023095	NorthernBobwhite_ScaffoldedDeNovo_contig_685	157494
GENSCAN00000033136	NorthernBobwhite_ScaffoldedDeNovo_contig_685	192857
GENSCAN00000032820	NorthernBobwhite_ScaffoldedDeNovo_contig_687	1481
GENSCAN00000005505	NorthernBobwhite_ScaffoldedDeNovo_contig_690	7195
GENSCAN00000005535	NorthernBobwhite_ScaffoldedDeNovo_contig_690	26894
GENSCAN00000024707	NorthernBobwhite_ScaffoldedDeNovo_contig_691	18702
GENSCAN00000031560	NorthernBobwhite_ScaffoldedDeNovo_contig_691	42291
GENSCAN00000024710	NorthernBobwhite_ScaffoldedDeNovo_contig_691	48423
GENSCAN00000024704	NorthernBobwhite_ScaffoldedDeNovo_contig_691	59168
GENSCAN00000010030	NorthernBobwhite_ScaffoldedDeNovo_contig_692	4401
GENSCAN00000010031	NorthernBobwhite_ScaffoldedDeNovo_contig_692	33278
GENSCAN00000010052	NorthernBobwhite_ScaffoldedDeNovo_contig_692	40414
GENSCAN00000010068	NorthernBobwhite_ScaffoldedDeNovo_contig_692	48748
GENSCAN00000010049	NorthernBobwhite_ScaffoldedDeNovo_contig_692	72234
GENSCAN00000010042	NorthernBobwhite_ScaffoldedDeNovo_contig_692	87209
GENSCAN00000010039	NorthernBobwhite_ScaffoldedDeNovo_contig_692	114330
GENSCAN00000004379	NorthernBobwhite_ScaffoldedDeNovo_contig_695	2749
GENSCAN00000023745	NorthernBobwhite_ScaffoldedDeNovo_contig_695	2749
GENSCAN00000034250	NorthernBobwhite_ScaffoldedDeNovo_contig_695	2749
GENSCAN00000036509	NorthernBobwhite_ScaffoldedDeNovo_contig_695	2749
GENSCAN00000009074	NorthernBobwhite_ScaffoldedDeNovo_contig_698	11780
GENSCAN00000009062	NorthernBobwhite_ScaffoldedDeNovo_contig_698	41509
GENSCAN00000002992	NorthernBobwhite_ScaffoldedDeNovo_contig_699	4265
GENSCAN00000023167	NorthernBobwhite_ScaffoldedDeNovo_contig_700	7166
GENSCAN00000023163	NorthernBobwhite_ScaffoldedDeNovo_contig_700	47163
GENSCAN00000036860	NorthernBobwhite_ScaffoldedDeNovo_contig_701	14780
GENSCAN00000028741	NorthernBobwhite_ScaffoldedDeNovo_contig_703	22268
GENSCAN00000034555	NorthernBobwhite_ScaffoldedDeNovo_contig_704	8389
GENSCAN00000034574	NorthernBobwhite_ScaffoldedDeNovo_contig_704	26706
GENSCAN00000006419	NorthernBobwhite_ScaffoldedDeNovo_contig_709	28404
GENSCAN00000006440	NorthernBobwhite_ScaffoldedDeNovo_contig_709	44452
GENSCAN00000004708	NorthernBobwhite_ScaffoldedDeNovo_contig_710	4523
GENSCAN00000004670	NorthernBobwhite_ScaffoldedDeNovo_contig_710	32633
GENSCAN00000004655	NorthernBobwhite_ScaffoldedDeNovo_contig_710	40771
GENSCAN00000004678	NorthernBobwhite_ScaffoldedDeNovo_contig_710	56881
GENSCAN00000006015	NorthernBobwhite_ScaffoldedDeNovo_contig_712	1695
GENSCAN00000005987	NorthernBobwhite_ScaffoldedDeNovo_contig_712	11926
GENSCAN00000006020	NorthernBobwhite_ScaffoldedDeNovo_contig_712	28989
GENSCAN00000006021	NorthernBobwhite_ScaffoldedDeNovo_contig_712	39789
GENSCAN00000006016	NorthernBobwhite_ScaffoldedDeNovo_contig_712	55569
GENSCAN00000033740	NorthernBobwhite_ScaffoldedDeNovo_contig_716	1022
GENSCAN00000032632	NorthernBobwhite_ScaffoldedDeNovo_contig_716	17536
GENSCAN00000009187	NorthernBobwhite_ScaffoldedDeNovo_contig_716	17851
GENSCAN00000036012	NorthernBobwhite_ScaffoldedDeNovo_contig_716	28592
GENSCAN00000026103	NorthernBobwhite_ScaffoldedDeNovo_contig_717	11174
GENSCAN00000025587	NorthernBobwhite_ScaffoldedDeNovo_contig_719	97498
GENSCAN00000025591	NorthernBobwhite_ScaffoldedDeNovo_contig_719	121455
GENSCAN00000025588	NorthernBobwhite_ScaffoldedDeNovo_contig_719	135209
GENSCAN00000008369	NorthernBobwhite_ScaffoldedDeNovo_contig_720	126
GENSCAN00000026600	NorthernBobwhite_ScaffoldedDeNovo_contig_722	16378
GENSCAN00000026599	NorthernBobwhite_ScaffoldedDeNovo_contig_722	59030
GENSCAN00000027370	NorthernBobwhite_ScaffoldedDeNovo_contig_723	2271
GENSCAN00000027378	NorthernBobwhite_ScaffoldedDeNovo_contig_723	53571
GENSCAN00000020988	NorthernBobwhite_ScaffoldedDeNovo_contig_724	65529
GENSCAN00000001102	NorthernBobwhite_ScaffoldedDeNovo_contig_725	36587
GENSCAN00000001140	NorthernBobwhite_ScaffoldedDeNovo_contig_725	51238
GENSCAN00000001109	NorthernBobwhite_ScaffoldedDeNovo_contig_725	55485
GENSCAN00000004315	NorthernBobwhite_ScaffoldedDeNovo_contig_726	9568
GENSCAN00000034901	NorthernBobwhite_ScaffoldedDeNovo_contig_727	18203
GENSCAN00000001865	NorthernBobwhite_ScaffoldedDeNovo_contig_728	47785
GENSCAN00000030054	NorthernBobwhite_ScaffoldedDeNovo_contig_732	19777
GENSCAN00000040015	NorthernBobwhite_ScaffoldedDeNovo_contig_733	685
GENSCAN00000002237	NorthernBobwhite_ScaffoldedDeNovo_contig_734	3836
GENSCAN00000002201	NorthernBobwhite_ScaffoldedDeNovo_contig_734	32625
GENSCAN00000002223	NorthernBobwhite_ScaffoldedDeNovo_contig_734	38998
GENSCAN00000002205	NorthernBobwhite_ScaffoldedDeNovo_contig_734	44519
GENSCAN00000002238	NorthernBobwhite_ScaffoldedDeNovo_contig_734	44519
GENSCAN00000020009	NorthernBobwhite_ScaffoldedDeNovo_contig_739	20315
GENSCAN00000019997	NorthernBobwhite_ScaffoldedDeNovo_contig_739	28292
GENSCAN00000017324	NorthernBobwhite_ScaffoldedDeNovo_contig_740	8243
GENSCAN00000017294	NorthernBobwhite_ScaffoldedDeNovo_contig_740	29165
GENSCAN00000017297	NorthernBobwhite_ScaffoldedDeNovo_contig_740	84218
GENSCAN00000017298	NorthernBobwhite_ScaffoldedDeNovo_contig_740	119058
GENSCAN00000028355	NorthernBobwhite_ScaffoldedDeNovo_contig_741	26419
GENSCAN00000005208	NorthernBobwhite_ScaffoldedDeNovo_contig_741	26419
GENSCAN00000034952	NorthernBobwhite_ScaffoldedDeNovo_contig_741	26419
GENSCAN00000028351	NorthernBobwhite_ScaffoldedDeNovo_contig_741	38042
GENSCAN00000028354	NorthernBobwhite_ScaffoldedDeNovo_contig_741	41326
GENSCAN00000028345	NorthernBobwhite_ScaffoldedDeNovo_contig_741	77604
GENSCAN00000028347	NorthernBobwhite_ScaffoldedDeNovo_contig_741	94332
GENSCAN00000019566	NorthernBobwhite_ScaffoldedDeNovo_contig_742	4121
GENSCAN00000011012	NorthernBobwhite_ScaffoldedDeNovo_contig_743	265
GENSCAN00000011018	NorthernBobwhite_ScaffoldedDeNovo_contig_743	51763
GENSCAN00000037556	NorthernBobwhite_ScaffoldedDeNovo_contig_745	39496
GENSCAN00000037811	NorthernBobwhite_ScaffoldedDeNovo_contig_747	1037
GENSCAN00000005121	NorthernBobwhite_ScaffoldedDeNovo_contig_747	34756
GENSCAN00000037808	NorthernBobwhite_ScaffoldedDeNovo_contig_747	57024
GENSCAN00000037826	NorthernBobwhite_ScaffoldedDeNovo_contig_747	72776
GENSCAN00000037829	NorthernBobwhite_ScaffoldedDeNovo_contig_747	77716
GENSCAN00000000481	NorthernBobwhite_ScaffoldedDeNovo_contig_747	80863
GENSCAN00000004058	NorthernBobwhite_ScaffoldedDeNovo_contig_747	83544
GENSCAN00000003782	NorthernBobwhite_ScaffoldedDeNovo_contig_747	85182
GENSCAN00000037831	NorthernBobwhite_ScaffoldedDeNovo_contig_747	94565
GENSCAN00000018637	NorthernBobwhite_ScaffoldedDeNovo_contig_748	12291
GENSCAN00000018639	NorthernBobwhite_ScaffoldedDeNovo_contig_748	17966
GENSCAN00000018620	NorthernBobwhite_ScaffoldedDeNovo_contig_748	53837
GENSCAN00000018635	NorthernBobwhite_ScaffoldedDeNovo_contig_748	58523
GENSCAN00000023407	NorthernBobwhite_ScaffoldedDeNovo_contig_749	38531
GENSCAN00000025002	NorthernBobwhite_ScaffoldedDeNovo_contig_750	1118
GENSCAN00000019840	NorthernBobwhite_ScaffoldedDeNovo_contig_752	7756
GENSCAN00000019851	NorthernBobwhite_ScaffoldedDeNovo_contig_752	11326
GENSCAN00000008081	NorthernBobwhite_ScaffoldedDeNovo_contig_753	3286
GENSCAN00000010193	NorthernBobwhite_ScaffoldedDeNovo_contig_755	2207
GENSCAN00000010201	NorthernBobwhite_ScaffoldedDeNovo_contig_755	17678
GENSCAN00000010209	NorthernBobwhite_ScaffoldedDeNovo_contig_755	40489
GENSCAN00000010206	NorthernBobwhite_ScaffoldedDeNovo_contig_755	47755
GENSCAN00000032544	NorthernBobwhite_ScaffoldedDeNovo_contig_756	162959
GENSCAN00000004337	NorthernBobwhite_ScaffoldedDeNovo_contig_757	54008
GENSCAN00000004362	NorthernBobwhite_ScaffoldedDeNovo_contig_757	83520
GENSCAN00000022586	NorthernBobwhite_ScaffoldedDeNovo_contig_760	21312
GENSCAN00000005040	NorthernBobwhite_ScaffoldedDeNovo_contig_760	134249
GENSCAN00000005052	NorthernBobwhite_ScaffoldedDeNovo_contig_760	141833
GENSCAN00000005056	NorthernBobwhite_ScaffoldedDeNovo_contig_760	192009
GENSCAN00000019284	NorthernBobwhite_ScaffoldedDeNovo_contig_762	387
GENSCAN00000012059	NorthernBobwhite_ScaffoldedDeNovo_contig_763	3435
GENSCAN00000012060	NorthernBobwhite_ScaffoldedDeNovo_contig_763	7302
GENSCAN00000027628	NorthernBobwhite_ScaffoldedDeNovo_contig_765	32478
GENSCAN00000027634	NorthernBobwhite_ScaffoldedDeNovo_contig_765	35715
GENSCAN00000025345	NorthernBobwhite_ScaffoldedDeNovo_contig_767	7393
GENSCAN00000025348	NorthernBobwhite_ScaffoldedDeNovo_contig_767	16959
GENSCAN00000025350	NorthernBobwhite_ScaffoldedDeNovo_contig_767	82749
GENSCAN00000025349	NorthernBobwhite_ScaffoldedDeNovo_contig_767	105869
GENSCAN00000025333	NorthernBobwhite_ScaffoldedDeNovo_contig_767	155075
GENSCAN00000025340	NorthernBobwhite_ScaffoldedDeNovo_contig_767	163338
GENSCAN00000025330	NorthernBobwhite_ScaffoldedDeNovo_contig_767	184084
GENSCAN00000020403	NorthernBobwhite_ScaffoldedDeNovo_contig_769	671
GENSCAN00000020406	NorthernBobwhite_ScaffoldedDeNovo_contig_769	3492
GENSCAN00000020410	NorthernBobwhite_ScaffoldedDeNovo_contig_769	69537
GENSCAN00000020429	NorthernBobwhite_ScaffoldedDeNovo_contig_769	93712
GENSCAN00000022253	NorthernBobwhite_ScaffoldedDeNovo_contig_770	42304
GENSCAN00000019619	NorthernBobwhite_ScaffoldedDeNovo_contig_771	21700
GENSCAN00000019652	NorthernBobwhite_ScaffoldedDeNovo_contig_771	52702
GENSCAN00000019629	NorthernBobwhite_ScaffoldedDeNovo_contig_771	88128
GENSCAN00000019648	NorthernBobwhite_ScaffoldedDeNovo_contig_771	99070
GENSCAN00000014509	NorthernBobwhite_ScaffoldedDeNovo_contig_773	7191
GENSCAN00000014513	NorthernBobwhite_ScaffoldedDeNovo_contig_773	46417
GENSCAN00000021920	NorthernBobwhite_ScaffoldedDeNovo_contig_774	56160
GENSCAN00000037091	NorthernBobwhite_ScaffoldedDeNovo_contig_775	8099
GENSCAN00000039928	NorthernBobwhite_ScaffoldedDeNovo_contig_776	2245
GENSCAN00000035207	NorthernBobwhite_ScaffoldedDeNovo_contig_776	11004
GENSCAN00000039929	NorthernBobwhite_ScaffoldedDeNovo_contig_776	34807
GENSCAN00000013740	NorthernBobwhite_ScaffoldedDeNovo_contig_776	42443
GENSCAN00000033964	NorthernBobwhite_ScaffoldedDeNovo_contig_776	50907
GENSCAN00000008595	NorthernBobwhite_ScaffoldedDeNovo_contig_779	17964
GENSCAN00000005228	NorthernBobwhite_ScaffoldedDeNovo_contig_782	19259
GENSCAN00000039052	NorthernBobwhite_ScaffoldedDeNovo_contig_783	7651
GENSCAN00000020441	NorthernBobwhite_ScaffoldedDeNovo_contig_784	9392
GENSCAN00000020437	NorthernBobwhite_ScaffoldedDeNovo_contig_784	13702
GENSCAN00000020431	NorthernBobwhite_ScaffoldedDeNovo_contig_784	20206
GENSCAN00000020415	NorthernBobwhite_ScaffoldedDeNovo_contig_784	47436
GENSCAN00000016222	NorthernBobwhite_ScaffoldedDeNovo_contig_785	16554
GENSCAN00000016205	NorthernBobwhite_ScaffoldedDeNovo_contig_785	60170
GENSCAN00000016224	NorthernBobwhite_ScaffoldedDeNovo_contig_785	95897
GENSCAN00000016226	NorthernBobwhite_ScaffoldedDeNovo_contig_785	104561
GENSCAN00000022955	NorthernBobwhite_ScaffoldedDeNovo_contig_787	6397
GENSCAN00000015412	NorthernBobwhite_ScaffoldedDeNovo_contig_789	9976
GENSCAN00000038418	NorthernBobwhite_ScaffoldedDeNovo_contig_791	1335
GENSCAN00000038435	NorthernBobwhite_ScaffoldedDeNovo_contig_791	21214
GENSCAN00000024607	NorthernBobwhite_ScaffoldedDeNovo_contig_793	24360
GENSCAN00000024603	NorthernBobwhite_ScaffoldedDeNovo_contig_793	31033
GENSCAN00000024590	NorthernBobwhite_ScaffoldedDeNovo_contig_793	54329
GENSCAN00000024592	NorthernBobwhite_ScaffoldedDeNovo_contig_793	63792
GENSCAN00000023362	NorthernBobwhite_ScaffoldedDeNovo_contig_794	6274
GENSCAN00000018403	NorthernBobwhite_ScaffoldedDeNovo_contig_795	7139
GENSCAN00000018433	NorthernBobwhite_ScaffoldedDeNovo_contig_795	33328
GENSCAN00000006812	NorthernBobwhite_ScaffoldedDeNovo_contig_798	39594
GENSCAN00000006829	NorthernBobwhite_ScaffoldedDeNovo_contig_798	58509
GENSCAN00000006807	NorthernBobwhite_ScaffoldedDeNovo_contig_798	72086
GENSCAN00000000878	NorthernBobwhite_ScaffoldedDeNovo_contig_803	3219
GENSCAN00000025051	NorthernBobwhite_ScaffoldedDeNovo_contig_805	17663
GENSCAN00000025057	NorthernBobwhite_ScaffoldedDeNovo_contig_805	33061
GENSCAN00000025054	NorthernBobwhite_ScaffoldedDeNovo_contig_805	95253
GENSCAN00000025067	NorthernBobwhite_ScaffoldedDeNovo_contig_805	105872
GENSCAN00000025055	NorthernBobwhite_ScaffoldedDeNovo_contig_805	114831
GENSCAN00000025920	NorthernBobwhite_ScaffoldedDeNovo_contig_808	17329
GENSCAN00000025738	NorthernBobwhite_ScaffoldedDeNovo_contig_808	18628
GENSCAN00000025739	NorthernBobwhite_ScaffoldedDeNovo_contig_808	24583
GENSCAN00000025919	NorthernBobwhite_ScaffoldedDeNovo_contig_808	24583
GENSCAN00000027038	NorthernBobwhite_ScaffoldedDeNovo_contig_808	24583
GENSCAN00000010118	NorthernBobwhite_ScaffoldedDeNovo_contig_813	1
GENSCAN00000035030	NorthernBobwhite_ScaffoldedDeNovo_contig_814	1816
GENSCAN00000016785	NorthernBobwhite_ScaffoldedDeNovo_contig_814	1818
GENSCAN00000016809	NorthernBobwhite_ScaffoldedDeNovo_contig_814	14512
GENSCAN00000035029	NorthernBobwhite_ScaffoldedDeNovo_contig_814	35310
GENSCAN00000016792	NorthernBobwhite_ScaffoldedDeNovo_contig_814	92620
GENSCAN00000006708	NorthernBobwhite_ScaffoldedDeNovo_contig_814	97689
GENSCAN00000016793	NorthernBobwhite_ScaffoldedDeNovo_contig_814	110377
GENSCAN00000016804	NorthernBobwhite_ScaffoldedDeNovo_contig_814	145681
GENSCAN00000016801	NorthernBobwhite_ScaffoldedDeNovo_contig_814	167386
GENSCAN00000016795	NorthernBobwhite_ScaffoldedDeNovo_contig_814	179884
GENSCAN00000016788	NorthernBobwhite_ScaffoldedDeNovo_contig_814	190845
GENSCAN00000016798	NorthernBobwhite_ScaffoldedDeNovo_contig_814	206260
GENSCAN00000016787	NorthernBobwhite_ScaffoldedDeNovo_contig_814	218270
GENSCAN00000016796	NorthernBobwhite_ScaffoldedDeNovo_contig_814	231065
GENSCAN00000016791	NorthernBobwhite_ScaffoldedDeNovo_contig_814	253913
GENSCAN00000034383	NorthernBobwhite_ScaffoldedDeNovo_contig_814	255929
GENSCAN00000016784	NorthernBobwhite_ScaffoldedDeNovo_contig_814	255929
GENSCAN00000014428	NorthernBobwhite_ScaffoldedDeNovo_contig_816	3537
GENSCAN00000014873	NorthernBobwhite_ScaffoldedDeNovo_contig_818	4388
GENSCAN00000007559	NorthernBobwhite_ScaffoldedDeNovo_contig_819	21178
GENSCAN00000007555	NorthernBobwhite_ScaffoldedDeNovo_contig_819	89319
GENSCAN00000007554	NorthernBobwhite_ScaffoldedDeNovo_contig_819	111828
GENSCAN00000007546	NorthernBobwhite_ScaffoldedDeNovo_contig_819	137882
GENSCAN00000004999	NorthernBobwhite_ScaffoldedDeNovo_contig_820	11802
GENSCAN00000005018	NorthernBobwhite_ScaffoldedDeNovo_contig_820	47322
GENSCAN00000005015	NorthernBobwhite_ScaffoldedDeNovo_contig_820	104800
GENSCAN00000004993	NorthernBobwhite_ScaffoldedDeNovo_contig_820	111465
GENSCAN00000005002	NorthernBobwhite_ScaffoldedDeNovo_contig_820	142029
GENSCAN00000025068	NorthernBobwhite_ScaffoldedDeNovo_contig_820	156688
GENSCAN00000025066	NorthernBobwhite_ScaffoldedDeNovo_contig_820	165517
GENSCAN00000035901	NorthernBobwhite_ScaffoldedDeNovo_contig_823	11521
GENSCAN00000035915	NorthernBobwhite_ScaffoldedDeNovo_contig_823	14869
GENSCAN00000035902	NorthernBobwhite_ScaffoldedDeNovo_contig_823	29211
GENSCAN00000035912	NorthernBobwhite_ScaffoldedDeNovo_contig_823	39536
GENSCAN00000035925	NorthernBobwhite_ScaffoldedDeNovo_contig_823	52409
GENSCAN00000023734	NorthernBobwhite_ScaffoldedDeNovo_contig_824	88926
GENSCAN00000038945	NorthernBobwhite_ScaffoldedDeNovo_contig_825	4521
GENSCAN00000038967	NorthernBobwhite_ScaffoldedDeNovo_contig_825	48058
GENSCAN00000038970	NorthernBobwhite_ScaffoldedDeNovo_contig_825	56594
GENSCAN00000038964	NorthernBobwhite_ScaffoldedDeNovo_contig_825	84208
GENSCAN00000038942	NorthernBobwhite_ScaffoldedDeNovo_contig_825	95192
GENSCAN00000011809	NorthernBobwhite_ScaffoldedDeNovo_contig_826	33419
GENSCAN00000027826	NorthernBobwhite_ScaffoldedDeNovo_contig_828	45428
GENSCAN00000027833	NorthernBobwhite_ScaffoldedDeNovo_contig_828	58771
GENSCAN00000027827	NorthernBobwhite_ScaffoldedDeNovo_contig_828	64287
GENSCAN00000027797	NorthernBobwhite_ScaffoldedDeNovo_contig_828	103637
GENSCAN00000027801	NorthernBobwhite_ScaffoldedDeNovo_contig_828	156431
GENSCAN00000033064	NorthernBobwhite_ScaffoldedDeNovo_contig_828	161133
GENSCAN00000028610	NorthernBobwhite_ScaffoldedDeNovo_contig_829	12008
GENSCAN00000008972	NorthernBobwhite_ScaffoldedDeNovo_contig_829	39968
GENSCAN00000008978	NorthernBobwhite_ScaffoldedDeNovo_contig_829	48063
GENSCAN00000008981	NorthernBobwhite_ScaffoldedDeNovo_contig_829	68502
GENSCAN00000014798	NorthernBobwhite_ScaffoldedDeNovo_contig_830	37620
GENSCAN00000008703	NorthernBobwhite_ScaffoldedDeNovo_contig_830	75734
GENSCAN00000008706	NorthernBobwhite_ScaffoldedDeNovo_contig_830	91081
GENSCAN00000008700	NorthernBobwhite_ScaffoldedDeNovo_contig_830	107236
GENSCAN00000008681	NorthernBobwhite_ScaffoldedDeNovo_contig_830	113955
GENSCAN00000008670	NorthernBobwhite_ScaffoldedDeNovo_contig_830	189450
GENSCAN00000030704	NorthernBobwhite_ScaffoldedDeNovo_contig_832	21434
GENSCAN00000030692	NorthernBobwhite_ScaffoldedDeNovo_contig_832	35151
GENSCAN00000000387	NorthernBobwhite_ScaffoldedDeNovo_contig_833	33212
GENSCAN00000000374	NorthernBobwhite_ScaffoldedDeNovo_contig_833	42019
GENSCAN00000000373	NorthernBobwhite_ScaffoldedDeNovo_contig_833	49083
GENSCAN00000000365	NorthernBobwhite_ScaffoldedDeNovo_contig_833	66921
GENSCAN00000000378	NorthernBobwhite_ScaffoldedDeNovo_contig_833	132661
GENSCAN00000000386	NorthernBobwhite_ScaffoldedDeNovo_contig_833	138934
GENSCAN00000000384	NorthernBobwhite_ScaffoldedDeNovo_contig_833	163382
GENSCAN00000023657	NorthernBobwhite_ScaffoldedDeNovo_contig_834	8200
GENSCAN00000023630	NorthernBobwhite_ScaffoldedDeNovo_contig_834	16924
GENSCAN00000033381	NorthernBobwhite_ScaffoldedDeNovo_contig_838	19603
GENSCAN00000033378	NorthernBobwhite_ScaffoldedDeNovo_contig_838	47460
GENSCAN00000030093	NorthernBobwhite_ScaffoldedDeNovo_contig_840	5481
GENSCAN00000030116	NorthernBobwhite_ScaffoldedDeNovo_contig_840	26638
GENSCAN00000016947	NorthernBobwhite_ScaffoldedDeNovo_contig_842	21202
GENSCAN00000039693	NorthernBobwhite_ScaffoldedDeNovo_contig_843	4567
GENSCAN00000037738	NorthernBobwhite_ScaffoldedDeNovo_contig_844	12045
GENSCAN00000037743	NorthernBobwhite_ScaffoldedDeNovo_contig_844	109708
GENSCAN00000037744	NorthernBobwhite_ScaffoldedDeNovo_contig_844	144032
GENSCAN00000027507	NorthernBobwhite_ScaffoldedDeNovo_contig_845	44142
GENSCAN00000027512	NorthernBobwhite_ScaffoldedDeNovo_contig_845	59870
GENSCAN00000027509	NorthernBobwhite_ScaffoldedDeNovo_contig_845	73571
GENSCAN00000027476	NorthernBobwhite_ScaffoldedDeNovo_contig_845	80925
GENSCAN00000017945	NorthernBobwhite_ScaffoldedDeNovo_contig_848	1751
GENSCAN00000017974	NorthernBobwhite_ScaffoldedDeNovo_contig_848	41664
GENSCAN00000017971	NorthernBobwhite_ScaffoldedDeNovo_contig_848	52845
GENSCAN00000017948	NorthernBobwhite_ScaffoldedDeNovo_contig_848	59672
GENSCAN00000017959	NorthernBobwhite_ScaffoldedDeNovo_contig_848	64124
GENSCAN00000017950	NorthernBobwhite_ScaffoldedDeNovo_contig_848	88621
GENSCAN00000017975	NorthernBobwhite_ScaffoldedDeNovo_contig_848	133482
GENSCAN00000027517	NorthernBobwhite_ScaffoldedDeNovo_contig_853	35398
GENSCAN00000019277	NorthernBobwhite_ScaffoldedDeNovo_contig_854	21691
GENSCAN00000019278	NorthernBobwhite_ScaffoldedDeNovo_contig_854	65593
GENSCAN00000019275	NorthernBobwhite_ScaffoldedDeNovo_contig_854	76633
GENSCAN00000019248	NorthernBobwhite_ScaffoldedDeNovo_contig_854	96807
GENSCAN00000019250	NorthernBobwhite_ScaffoldedDeNovo_contig_854	127483
GENSCAN00000019265	NorthernBobwhite_ScaffoldedDeNovo_contig_854	132125
GENSCAN00000019279	NorthernBobwhite_ScaffoldedDeNovo_contig_854	136364
GENSCAN00000019239	NorthernBobwhite_ScaffoldedDeNovo_contig_854	150642
GENSCAN00000019252	NorthernBobwhite_ScaffoldedDeNovo_contig_854	165907
GENSCAN00000023669	NorthernBobwhite_ScaffoldedDeNovo_contig_855	27461
GENSCAN00000035978	NorthernBobwhite_ScaffoldedDeNovo_contig_856	32015
GENSCAN00000036271	NorthernBobwhite_ScaffoldedDeNovo_contig_857	18125
GENSCAN00000036273	NorthernBobwhite_ScaffoldedDeNovo_contig_857	37990
GENSCAN00000036275	NorthernBobwhite_ScaffoldedDeNovo_contig_857	50902
GENSCAN00000036288	NorthernBobwhite_ScaffoldedDeNovo_contig_857	69930
GENSCAN00000036284	NorthernBobwhite_ScaffoldedDeNovo_contig_857	78550
GENSCAN00000036276	NorthernBobwhite_ScaffoldedDeNovo_contig_857	96423
GENSCAN00000036268	NorthernBobwhite_ScaffoldedDeNovo_contig_857	110390
GENSCAN00000036279	NorthernBobwhite_ScaffoldedDeNovo_contig_857	144866
GENSCAN00000005342	NorthernBobwhite_ScaffoldedDeNovo_contig_860	5219
GENSCAN00000005335	NorthernBobwhite_ScaffoldedDeNovo_contig_860	42309
GENSCAN00000005365	NorthernBobwhite_ScaffoldedDeNovo_contig_860	115523
GENSCAN00000005367	NorthernBobwhite_ScaffoldedDeNovo_contig_860	149074
GENSCAN00000005328	NorthernBobwhite_ScaffoldedDeNovo_contig_860	161708
GENSCAN00000005362	NorthernBobwhite_ScaffoldedDeNovo_contig_860	171454
GENSCAN00000005373	NorthernBobwhite_ScaffoldedDeNovo_contig_860	214893
GENSCAN00000014665	NorthernBobwhite_ScaffoldedDeNovo_contig_864	6015
GENSCAN00000014640	NorthernBobwhite_ScaffoldedDeNovo_contig_864	14995
GENSCAN00000034670	NorthernBobwhite_ScaffoldedDeNovo_contig_867	92440
GENSCAN00000034660	NorthernBobwhite_ScaffoldedDeNovo_contig_867	104539
GENSCAN00000034650	NorthernBobwhite_ScaffoldedDeNovo_contig_867	122220
GENSCAN00000034651	NorthernBobwhite_ScaffoldedDeNovo_contig_867	131496
GENSCAN00000040330	NorthernBobwhite_ScaffoldedDeNovo_contig_868	12008
GENSCAN00000018611	NorthernBobwhite_ScaffoldedDeNovo_contig_869	5860
GENSCAN00000001513	NorthernBobwhite_ScaffoldedDeNovo_contig_871	2861
GENSCAN00000004049	NorthernBobwhite_ScaffoldedDeNovo_contig_872	18641
GENSCAN00000031815	NorthernBobwhite_ScaffoldedDeNovo_contig_874	6645
GENSCAN00000035713	NorthernBobwhite_ScaffoldedDeNovo_contig_875	115304
GENSCAN00000035725	NorthernBobwhite_ScaffoldedDeNovo_contig_875	117022
GENSCAN00000035716	NorthernBobwhite_ScaffoldedDeNovo_contig_875	140097
GENSCAN00000035727	NorthernBobwhite_ScaffoldedDeNovo_contig_875	147380
GENSCAN00000035710	NorthernBobwhite_ScaffoldedDeNovo_contig_875	151721
GENSCAN00000035706	NorthernBobwhite_ScaffoldedDeNovo_contig_875	173190
GENSCAN00000035730	NorthernBobwhite_ScaffoldedDeNovo_contig_875	202664
GENSCAN00000035733	NorthernBobwhite_ScaffoldedDeNovo_contig_875	224814
GENSCAN00000035731	NorthernBobwhite_ScaffoldedDeNovo_contig_875	242035
GENSCAN00000035703	NorthernBobwhite_ScaffoldedDeNovo_contig_875	244346
GENSCAN00000035711	NorthernBobwhite_ScaffoldedDeNovo_contig_875	250363
GENSCAN00000012472	NorthernBobwhite_ScaffoldedDeNovo_contig_876	1150
GENSCAN00000025036	NorthernBobwhite_ScaffoldedDeNovo_contig_877	40892
GENSCAN00000025042	NorthernBobwhite_ScaffoldedDeNovo_contig_877	54137
GENSCAN00000018540	NorthernBobwhite_ScaffoldedDeNovo_contig_879	24012
GENSCAN00000018543	NorthernBobwhite_ScaffoldedDeNovo_contig_879	39573
GENSCAN00000018504	NorthernBobwhite_ScaffoldedDeNovo_contig_879	71002
GENSCAN00000018417	NorthernBobwhite_ScaffoldedDeNovo_contig_880	6163
GENSCAN00000008627	NorthernBobwhite_ScaffoldedDeNovo_contig_881	15181
GENSCAN00000008632	NorthernBobwhite_ScaffoldedDeNovo_contig_881	29620
GENSCAN00000008631	NorthernBobwhite_ScaffoldedDeNovo_contig_881	48709
GENSCAN00000008628	NorthernBobwhite_ScaffoldedDeNovo_contig_881	60779
GENSCAN00000008616	NorthernBobwhite_ScaffoldedDeNovo_contig_881	69550
GENSCAN00000040331	NorthernBobwhite_ScaffoldedDeNovo_contig_881	93232
GENSCAN00000016452	NorthernBobwhite_ScaffoldedDeNovo_contig_883	10001
GENSCAN00000016449	NorthernBobwhite_ScaffoldedDeNovo_contig_883	54050
GENSCAN00000016428	NorthernBobwhite_ScaffoldedDeNovo_contig_883	66331
GENSCAN00000016418	NorthernBobwhite_ScaffoldedDeNovo_contig_883	85596
GENSCAN00000016417	NorthernBobwhite_ScaffoldedDeNovo_contig_883	98864
GENSCAN00000016438	NorthernBobwhite_ScaffoldedDeNovo_contig_883	136545
GENSCAN00000039966	NorthernBobwhite_ScaffoldedDeNovo_contig_884	47614
GENSCAN00000039967	NorthernBobwhite_ScaffoldedDeNovo_contig_884	84151
GENSCAN00000040002	NorthernBobwhite_ScaffoldedDeNovo_contig_884	103546
GENSCAN00000039977	NorthernBobwhite_ScaffoldedDeNovo_contig_884	114457
GENSCAN00000023631	NorthernBobwhite_ScaffoldedDeNovo_contig_885	1568
GENSCAN00000023628	NorthernBobwhite_ScaffoldedDeNovo_contig_885	11330
GENSCAN00000035766	NorthernBobwhite_ScaffoldedDeNovo_contig_886	70285
GENSCAN00000035748	NorthernBobwhite_ScaffoldedDeNovo_contig_886	74859
GENSCAN00000002453	NorthernBobwhite_ScaffoldedDeNovo_contig_887	10126
GENSCAN00000002458	NorthernBobwhite_ScaffoldedDeNovo_contig_887	47905
GENSCAN00000002455	NorthernBobwhite_ScaffoldedDeNovo_contig_887	91530
GENSCAN00000008817	NorthernBobwhite_ScaffoldedDeNovo_contig_889	73411
GENSCAN00000040567	NorthernBobwhite_ScaffoldedDeNovo_contig_890	54615
GENSCAN00000040571	NorthernBobwhite_ScaffoldedDeNovo_contig_890	58526
GENSCAN00000040560	NorthernBobwhite_ScaffoldedDeNovo_contig_890	61587
GENSCAN00000000022	NorthernBobwhite_ScaffoldedDeNovo_contig_890	62865
GENSCAN00000032541	NorthernBobwhite_ScaffoldedDeNovo_contig_892	8281
GENSCAN00000032548	NorthernBobwhite_ScaffoldedDeNovo_contig_892	23522
GENSCAN00000020550	NorthernBobwhite_ScaffoldedDeNovo_contig_893	17858
GENSCAN00000009283	NorthernBobwhite_ScaffoldedDeNovo_contig_894	32870
GENSCAN00000034698	NorthernBobwhite_ScaffoldedDeNovo_contig_896	24022
GENSCAN00000034701	NorthernBobwhite_ScaffoldedDeNovo_contig_896	43780
GENSCAN00000009901	NorthernBobwhite_ScaffoldedDeNovo_contig_896	55824
GENSCAN00000010059	NorthernBobwhite_ScaffoldedDeNovo_contig_898	72022
GENSCAN00000010036	NorthernBobwhite_ScaffoldedDeNovo_contig_898	75182
GENSCAN00000010069	NorthernBobwhite_ScaffoldedDeNovo_contig_898	98976
GENSCAN00000010051	NorthernBobwhite_ScaffoldedDeNovo_contig_898	105095
GENSCAN00000010055	NorthernBobwhite_ScaffoldedDeNovo_contig_898	131148
GENSCAN00000010033	NorthernBobwhite_ScaffoldedDeNovo_contig_898	140847
GENSCAN00000028220	NorthernBobwhite_ScaffoldedDeNovo_contig_899	29196
GENSCAN00000028245	NorthernBobwhite_ScaffoldedDeNovo_contig_899	33430
GENSCAN00000028248	NorthernBobwhite_ScaffoldedDeNovo_contig_899	36335
GENSCAN00000028242	NorthernBobwhite_ScaffoldedDeNovo_contig_899	50241
GENSCAN00000028216	NorthernBobwhite_ScaffoldedDeNovo_contig_899	74511
GENSCAN00000029846	NorthernBobwhite_ScaffoldedDeNovo_contig_904	68192
GENSCAN00000003881	NorthernBobwhite_ScaffoldedDeNovo_contig_905	8504
GENSCAN00000026412	NorthernBobwhite_ScaffoldedDeNovo_contig_906	13059
GENSCAN00000020546	NorthernBobwhite_ScaffoldedDeNovo_contig_908	6795
GENSCAN00000020562	NorthernBobwhite_ScaffoldedDeNovo_contig_908	12386
GENSCAN00000020559	NorthernBobwhite_ScaffoldedDeNovo_contig_908	27713
GENSCAN00000020568	NorthernBobwhite_ScaffoldedDeNovo_contig_908	49261
GENSCAN00000020573	NorthernBobwhite_ScaffoldedDeNovo_contig_908	57863
GENSCAN00000009824	NorthernBobwhite_ScaffoldedDeNovo_contig_911	20546
GENSCAN00000001368	NorthernBobwhite_ScaffoldedDeNovo_contig_912	98657
GENSCAN00000019292	NorthernBobwhite_ScaffoldedDeNovo_contig_912	168693
GENSCAN00000021684	NorthernBobwhite_ScaffoldedDeNovo_contig_914	26522
GENSCAN00000021685	NorthernBobwhite_ScaffoldedDeNovo_contig_914	54739
GENSCAN00000037659	NorthernBobwhite_ScaffoldedDeNovo_contig_915	23432
GENSCAN00000029332	NorthernBobwhite_ScaffoldedDeNovo_contig_916	6728
GENSCAN00000029331	NorthernBobwhite_ScaffoldedDeNovo_contig_916	47726
GENSCAN00000023817	NorthernBobwhite_ScaffoldedDeNovo_contig_917	24742
GENSCAN00000023826	NorthernBobwhite_ScaffoldedDeNovo_contig_917	46082
GENSCAN00000014495	NorthernBobwhite_ScaffoldedDeNovo_contig_918	717
GENSCAN00000000079	NorthernBobwhite_ScaffoldedDeNovo_contig_919	62426
GENSCAN00000019173	NorthernBobwhite_ScaffoldedDeNovo_contig_920	16095
GENSCAN00000019191	NorthernBobwhite_ScaffoldedDeNovo_contig_920	52189
GENSCAN00000019166	NorthernBobwhite_ScaffoldedDeNovo_contig_920	81395
GENSCAN00000019189	NorthernBobwhite_ScaffoldedDeNovo_contig_920	146653
GENSCAN00000031550	NorthernBobwhite_ScaffoldedDeNovo_contig_921	57073
GENSCAN00000031545	NorthernBobwhite_ScaffoldedDeNovo_contig_921	77946
GENSCAN00000031549	NorthernBobwhite_ScaffoldedDeNovo_contig_921	77946
GENSCAN00000032431	NorthernBobwhite_ScaffoldedDeNovo_contig_927	15245
GENSCAN00000017161	NorthernBobwhite_ScaffoldedDeNovo_contig_929	6221
GENSCAN00000013790	NorthernBobwhite_ScaffoldedDeNovo_contig_929	53545
GENSCAN00000027375	NorthernBobwhite_ScaffoldedDeNovo_contig_930	51921
GENSCAN00000027380	NorthernBobwhite_ScaffoldedDeNovo_contig_930	78871
GENSCAN00000026512	NorthernBobwhite_ScaffoldedDeNovo_contig_931	2702
GENSCAN00000030810	NorthernBobwhite_ScaffoldedDeNovo_contig_932	1271
GENSCAN00000014785	NorthernBobwhite_ScaffoldedDeNovo_contig_933	31081
GENSCAN00000014802	NorthernBobwhite_ScaffoldedDeNovo_contig_933	37156
GENSCAN00000014805	NorthernBobwhite_ScaffoldedDeNovo_contig_933	62541
GENSCAN00000014807	NorthernBobwhite_ScaffoldedDeNovo_contig_933	72580
GENSCAN00000014806	NorthernBobwhite_ScaffoldedDeNovo_contig_933	94349
GENSCAN00000014783	NorthernBobwhite_ScaffoldedDeNovo_contig_933	103527
GENSCAN00000014789	NorthernBobwhite_ScaffoldedDeNovo_contig_933	130739
GENSCAN00000003680	NorthernBobwhite_ScaffoldedDeNovo_contig_934	5631
GENSCAN00000003715	NorthernBobwhite_ScaffoldedDeNovo_contig_934	85034
GENSCAN00000003704	NorthernBobwhite_ScaffoldedDeNovo_contig_934	112799
GENSCAN00000003707	NorthernBobwhite_ScaffoldedDeNovo_contig_934	148443
GENSCAN00000003710	NorthernBobwhite_ScaffoldedDeNovo_contig_934	279274
GENSCAN00000003701	NorthernBobwhite_ScaffoldedDeNovo_contig_934	287329
GENSCAN00000020044	NorthernBobwhite_ScaffoldedDeNovo_contig_938	48359
GENSCAN00000020031	NorthernBobwhite_ScaffoldedDeNovo_contig_938	58731
GENSCAN00000006454	NorthernBobwhite_ScaffoldedDeNovo_contig_941	30590
GENSCAN00000006410	NorthernBobwhite_ScaffoldedDeNovo_contig_941	51087
GENSCAN00000036849	NorthernBobwhite_ScaffoldedDeNovo_contig_942	1372
GENSCAN00000036837	NorthernBobwhite_ScaffoldedDeNovo_contig_942	31871
GENSCAN00000036839	NorthernBobwhite_ScaffoldedDeNovo_contig_942	42084
GENSCAN00000006998	NorthernBobwhite_ScaffoldedDeNovo_contig_943	90
GENSCAN00000007001	NorthernBobwhite_ScaffoldedDeNovo_contig_943	27189
GENSCAN00000007012	NorthernBobwhite_ScaffoldedDeNovo_contig_943	68484
GENSCAN00000002764	NorthernBobwhite_ScaffoldedDeNovo_contig_944	3210
GENSCAN00000012081	NorthernBobwhite_ScaffoldedDeNovo_contig_944	9380
GENSCAN00000012105	NorthernBobwhite_ScaffoldedDeNovo_contig_944	32819
GENSCAN00000012089	NorthernBobwhite_ScaffoldedDeNovo_contig_944	107513
GENSCAN00000012101	NorthernBobwhite_ScaffoldedDeNovo_contig_944	119582
GENSCAN00000012104	NorthernBobwhite_ScaffoldedDeNovo_contig_944	129542
GENSCAN00000010218	NorthernBobwhite_ScaffoldedDeNovo_contig_945	54261
GENSCAN00000030439	NorthernBobwhite_ScaffoldedDeNovo_contig_948	38286
GENSCAN00000030405	NorthernBobwhite_ScaffoldedDeNovo_contig_948	52270
GENSCAN00000030444	NorthernBobwhite_ScaffoldedDeNovo_contig_948	72749
GENSCAN00000021362	NorthernBobwhite_ScaffoldedDeNovo_contig_949	711
GENSCAN00000021330	NorthernBobwhite_ScaffoldedDeNovo_contig_949	8845
GENSCAN00000021381	NorthernBobwhite_ScaffoldedDeNovo_contig_949	14008
GENSCAN00000004698	NorthernBobwhite_ScaffoldedDeNovo_contig_951	41473
GENSCAN00000040406	NorthernBobwhite_ScaffoldedDeNovo_contig_951	47672
GENSCAN00000005588	NorthernBobwhite_ScaffoldedDeNovo_contig_953	18983
GENSCAN00000005589	NorthernBobwhite_ScaffoldedDeNovo_contig_953	47368
GENSCAN00000017447	NorthernBobwhite_ScaffoldedDeNovo_contig_954	20787
GENSCAN00000017667	NorthernBobwhite_ScaffoldedDeNovo_contig_956	19676
GENSCAN00000004485	NorthernBobwhite_ScaffoldedDeNovo_contig_958	29055
GENSCAN00000004503	NorthernBobwhite_ScaffoldedDeNovo_contig_958	52179
GENSCAN00000037311	NorthernBobwhite_ScaffoldedDeNovo_contig_960	34062
GENSCAN00000037314	NorthernBobwhite_ScaffoldedDeNovo_contig_960	46495
GENSCAN00000037272	NorthernBobwhite_ScaffoldedDeNovo_contig_960	59869
GENSCAN00000037308	NorthernBobwhite_ScaffoldedDeNovo_contig_960	63793
GENSCAN00000002332	NorthernBobwhite_ScaffoldedDeNovo_contig_960	76893
GENSCAN00000017524	NorthernBobwhite_ScaffoldedDeNovo_contig_961	11658
GENSCAN00000017520	NorthernBobwhite_ScaffoldedDeNovo_contig_961	45747
GENSCAN00000017503	NorthernBobwhite_ScaffoldedDeNovo_contig_961	92697
GENSCAN00000018163	NorthernBobwhite_ScaffoldedDeNovo_contig_965	2157
GENSCAN00000018156	NorthernBobwhite_ScaffoldedDeNovo_contig_965	43204
GENSCAN00000000238	NorthernBobwhite_ScaffoldedDeNovo_contig_967	1269
GENSCAN00000031027	NorthernBobwhite_ScaffoldedDeNovo_contig_968	4029
GENSCAN00000030097	NorthernBobwhite_ScaffoldedDeNovo_contig_969	18224
GENSCAN00000022698	NorthernBobwhite_ScaffoldedDeNovo_contig_971	9629
GENSCAN00000038249	NorthernBobwhite_ScaffoldedDeNovo_contig_971	60940
GENSCAN00000001520	NorthernBobwhite_ScaffoldedDeNovo_contig_971	75303
GENSCAN00000023881	NorthernBobwhite_ScaffoldedDeNovo_contig_971	118796
GENSCAN00000023880	NorthernBobwhite_ScaffoldedDeNovo_contig_971	120874
GENSCAN00000014792	NorthernBobwhite_ScaffoldedDeNovo_contig_972	12810
GENSCAN00000019495	NorthernBobwhite_ScaffoldedDeNovo_contig_973	7611
GENSCAN00000019498	NorthernBobwhite_ScaffoldedDeNovo_contig_973	17810
GENSCAN00000019468	NorthernBobwhite_ScaffoldedDeNovo_contig_973	54045
GENSCAN00000036254	NorthernBobwhite_ScaffoldedDeNovo_contig_974	39112
GENSCAN00000036255	NorthernBobwhite_ScaffoldedDeNovo_contig_974	48164
GENSCAN00000036252	NorthernBobwhite_ScaffoldedDeNovo_contig_974	109203
GENSCAN00000036258	NorthernBobwhite_ScaffoldedDeNovo_contig_974	130844
GENSCAN00000036253	NorthernBobwhite_ScaffoldedDeNovo_contig_974	199532
GENSCAN00000033035	NorthernBobwhite_ScaffoldedDeNovo_contig_975	16096
GENSCAN00000033027	NorthernBobwhite_ScaffoldedDeNovo_contig_975	43376
GENSCAN00000033032	NorthernBobwhite_ScaffoldedDeNovo_contig_975	98212
GENSCAN00000033037	NorthernBobwhite_ScaffoldedDeNovo_contig_975	172486
GENSCAN00000033040	NorthernBobwhite_ScaffoldedDeNovo_contig_975	207140
GENSCAN00000033031	NorthernBobwhite_ScaffoldedDeNovo_contig_975	235874
GENSCAN00000033030	NorthernBobwhite_ScaffoldedDeNovo_contig_975	253423
GENSCAN00000033029	NorthernBobwhite_ScaffoldedDeNovo_contig_975	256744
GENSCAN00000040345	NorthernBobwhite_ScaffoldedDeNovo_contig_976	5076
GENSCAN00000040346	NorthernBobwhite_ScaffoldedDeNovo_contig_976	8326
GENSCAN00000040352	NorthernBobwhite_ScaffoldedDeNovo_contig_976	49961
GENSCAN00000000822	NorthernBobwhite_ScaffoldedDeNovo_contig_977	6281
GENSCAN00000000811	NorthernBobwhite_ScaffoldedDeNovo_contig_977	12185
GENSCAN00000000797	NorthernBobwhite_ScaffoldedDeNovo_contig_977	18448
GENSCAN00000028945	NorthernBobwhite_ScaffoldedDeNovo_contig_978	591
GENSCAN00000028965	NorthernBobwhite_ScaffoldedDeNovo_contig_978	22438
GENSCAN00000025822	NorthernBobwhite_ScaffoldedDeNovo_contig_984	14352
GENSCAN00000037070	NorthernBobwhite_ScaffoldedDeNovo_contig_985	12937
GENSCAN00000037059	NorthernBobwhite_ScaffoldedDeNovo_contig_985	43781
GENSCAN00000037072	NorthernBobwhite_ScaffoldedDeNovo_contig_985	66721
GENSCAN00000037060	NorthernBobwhite_ScaffoldedDeNovo_contig_985	203652
GENSCAN00000000131	NorthernBobwhite_ScaffoldedDeNovo_contig_986	50070
GENSCAN00000001575	NorthernBobwhite_ScaffoldedDeNovo_contig_987	9774
GENSCAN00000015176	NorthernBobwhite_ScaffoldedDeNovo_contig_991	4431
GENSCAN00000015156	NorthernBobwhite_ScaffoldedDeNovo_contig_991	36629
GENSCAN00000037458	NorthernBobwhite_ScaffoldedDeNovo_contig_996	1873
GENSCAN00000037468	NorthernBobwhite_ScaffoldedDeNovo_contig_996	29911
GENSCAN00000037479	NorthernBobwhite_ScaffoldedDeNovo_contig_996	106626
GENSCAN00000037471	NorthernBobwhite_ScaffoldedDeNovo_contig_996	107174
GENSCAN00000037481	NorthernBobwhite_ScaffoldedDeNovo_contig_996	111025
GENSCAN00000037465	NorthernBobwhite_ScaffoldedDeNovo_contig_996	121740
GENSCAN00000016535	NorthernBobwhite_ScaffoldedDeNovo_contig_999	24434
GENSCAN00000016538	NorthernBobwhite_ScaffoldedDeNovo_contig_999	32657
GENSCAN00000016539	NorthernBobwhite_ScaffoldedDeNovo_contig_999	50151
GENSCAN00000016534	NorthernBobwhite_ScaffoldedDeNovo_contig_999	56199
GENSCAN00000016515	NorthernBobwhite_ScaffoldedDeNovo_contig_999	81612
GENSCAN00000016537	NorthernBobwhite_ScaffoldedDeNovo_contig_999	90040
GENSCAN00000028488	NorthernBobwhite_ScaffoldedDeNovo_contig_1000	870
GENSCAN00000007808	NorthernBobwhite_ScaffoldedDeNovo_contig_1000	17906
GENSCAN00000009496	NorthernBobwhite_ScaffoldedDeNovo_contig_1000	48023
GENSCAN00000009504	NorthernBobwhite_ScaffoldedDeNovo_contig_1000	57325
GENSCAN00000009739	NorthernBobwhite_ScaffoldedDeNovo_contig_1000	124532
GENSCAN00000036510	NorthernBobwhite_ScaffoldedDeNovo_contig_1000	124532
GENSCAN00000019749	NorthernBobwhite_ScaffoldedDeNovo_contig_1000	131257
GENSCAN00000026435	NorthernBobwhite_ScaffoldedDeNovo_contig_1000	131257
GENSCAN00000036511	NorthernBobwhite_ScaffoldedDeNovo_contig_1000	131257
GENSCAN00000000403	NorthernBobwhite_ScaffoldedDeNovo_contig_1001	4067
GENSCAN00000000399	NorthernBobwhite_ScaffoldedDeNovo_contig_1001	17269
GENSCAN00000030100	NorthernBobwhite_ScaffoldedDeNovo_contig_1004	19534
GENSCAN00000030087	NorthernBobwhite_ScaffoldedDeNovo_contig_1005	2481
GENSCAN00000030072	NorthernBobwhite_ScaffoldedDeNovo_contig_1005	16670
GENSCAN00000009331	NorthernBobwhite_ScaffoldedDeNovo_contig_1006	12404
GENSCAN00000035893	NorthernBobwhite_ScaffoldedDeNovo_contig_1007	1509
GENSCAN00000035894	NorthernBobwhite_ScaffoldedDeNovo_contig_1007	14095
GENSCAN00000003353	NorthernBobwhite_ScaffoldedDeNovo_contig_1007	14096
GENSCAN00000036954	NorthernBobwhite_ScaffoldedDeNovo_contig_1009	1775
GENSCAN00000029770	NorthernBobwhite_ScaffoldedDeNovo_contig_1010	69151
GENSCAN00000029786	NorthernBobwhite_ScaffoldedDeNovo_contig_1010	82886
GENSCAN00000040130	NorthernBobwhite_ScaffoldedDeNovo_contig_1011	20177
GENSCAN00000040121	NorthernBobwhite_ScaffoldedDeNovo_contig_1011	32579
GENSCAN00000040123	NorthernBobwhite_ScaffoldedDeNovo_contig_1011	48612
GENSCAN00000040118	NorthernBobwhite_ScaffoldedDeNovo_contig_1011	104399
GENSCAN00000040135	NorthernBobwhite_ScaffoldedDeNovo_contig_1011	126980
GENSCAN00000026610	NorthernBobwhite_ScaffoldedDeNovo_contig_1015	4688
GENSCAN00000015144	NorthernBobwhite_ScaffoldedDeNovo_contig_1016	9293
GENSCAN00000015160	NorthernBobwhite_ScaffoldedDeNovo_contig_1016	31882
GENSCAN00000015166	NorthernBobwhite_ScaffoldedDeNovo_contig_1016	34044
GENSCAN00000015152	NorthernBobwhite_ScaffoldedDeNovo_contig_1016	39316
GENSCAN00000026573	NorthernBobwhite_ScaffoldedDeNovo_contig_1016	57076
GENSCAN00000015164	NorthernBobwhite_ScaffoldedDeNovo_contig_1016	104879
GENSCAN00000015120	NorthernBobwhite_ScaffoldedDeNovo_contig_1016	108763
GENSCAN00000015119	NorthernBobwhite_ScaffoldedDeNovo_contig_1016	177027
GENSCAN00000015141	NorthernBobwhite_ScaffoldedDeNovo_contig_1016	192347
GENSCAN00000003495	NorthernBobwhite_ScaffoldedDeNovo_contig_1019	2812
GENSCAN00000003460	NorthernBobwhite_ScaffoldedDeNovo_contig_1019	18500
GENSCAN00000032143	NorthernBobwhite_ScaffoldedDeNovo_contig_1020	48
GENSCAN00000032147	NorthernBobwhite_ScaffoldedDeNovo_contig_1020	4485
GENSCAN00000005243	NorthernBobwhite_ScaffoldedDeNovo_contig_1022	1253
GENSCAN00000023929	NorthernBobwhite_ScaffoldedDeNovo_contig_1023	17186
GENSCAN00000023931	NorthernBobwhite_ScaffoldedDeNovo_contig_1023	35527
GENSCAN00000023930	NorthernBobwhite_ScaffoldedDeNovo_contig_1023	62768
GENSCAN00000023908	NorthernBobwhite_ScaffoldedDeNovo_contig_1023	82857
GENSCAN00000037209	NorthernBobwhite_ScaffoldedDeNovo_contig_1025	23049
GENSCAN00000037229	NorthernBobwhite_ScaffoldedDeNovo_contig_1025	63590
GENSCAN00000037198	NorthernBobwhite_ScaffoldedDeNovo_contig_1025	68950
GENSCAN00000015145	NorthernBobwhite_ScaffoldedDeNovo_contig_1027	27502
GENSCAN00000015136	NorthernBobwhite_ScaffoldedDeNovo_contig_1027	52712
GENSCAN00000013256	NorthernBobwhite_ScaffoldedDeNovo_contig_1029	9552
GENSCAN00000000989	NorthernBobwhite_ScaffoldedDeNovo_contig_1032	5828
GENSCAN00000002177	NorthernBobwhite_ScaffoldedDeNovo_contig_1034	4325
GENSCAN00000017696	NorthernBobwhite_ScaffoldedDeNovo_contig_1034	7953
GENSCAN00000021794	NorthernBobwhite_ScaffoldedDeNovo_contig_1035	17551
GENSCAN00000021811	NorthernBobwhite_ScaffoldedDeNovo_contig_1035	39122
GENSCAN00000021790	NorthernBobwhite_ScaffoldedDeNovo_contig_1035	47399
GENSCAN00000021764	NorthernBobwhite_ScaffoldedDeNovo_contig_1035	74990
GENSCAN00000012735	NorthernBobwhite_ScaffoldedDeNovo_contig_1037	9426
GENSCAN00000012739	NorthernBobwhite_ScaffoldedDeNovo_contig_1037	15818
GENSCAN00000012727	NorthernBobwhite_ScaffoldedDeNovo_contig_1037	20308
GENSCAN00000012683	NorthernBobwhite_ScaffoldedDeNovo_contig_1037	22441
GENSCAN00000012733	NorthernBobwhite_ScaffoldedDeNovo_contig_1037	65509
GENSCAN00000012730	NorthernBobwhite_ScaffoldedDeNovo_contig_1037	69856
GENSCAN00000012693	NorthernBobwhite_ScaffoldedDeNovo_contig_1037	78195
GENSCAN00000025585	NorthernBobwhite_ScaffoldedDeNovo_contig_1038	11818
GENSCAN00000025578	NorthernBobwhite_ScaffoldedDeNovo_contig_1038	87937
GENSCAN00000025573	NorthernBobwhite_ScaffoldedDeNovo_contig_1038	139207
GENSCAN00000025581	NorthernBobwhite_ScaffoldedDeNovo_contig_1038	159863
GENSCAN00000019474	NorthernBobwhite_ScaffoldedDeNovo_contig_1041	15863
GENSCAN00000003973	NorthernBobwhite_ScaffoldedDeNovo_contig_1042	18858
GENSCAN00000003992	NorthernBobwhite_ScaffoldedDeNovo_contig_1042	34932
GENSCAN00000003960	NorthernBobwhite_ScaffoldedDeNovo_contig_1042	48905
GENSCAN00000003990	NorthernBobwhite_ScaffoldedDeNovo_contig_1042	58558
GENSCAN00000016769	NorthernBobwhite_ScaffoldedDeNovo_contig_1042	79876
GENSCAN00000016768	NorthernBobwhite_ScaffoldedDeNovo_contig_1042	98045
GENSCAN00000005795	NorthernBobwhite_ScaffoldedDeNovo_contig_1045	35603
GENSCAN00000005825	NorthernBobwhite_ScaffoldedDeNovo_contig_1045	37106
GENSCAN00000005822	NorthernBobwhite_ScaffoldedDeNovo_contig_1045	54856
GENSCAN00000016137	NorthernBobwhite_ScaffoldedDeNovo_contig_1046	35887
GENSCAN00000003819	NorthernBobwhite_ScaffoldedDeNovo_contig_1047	38669
GENSCAN00000009317	NorthernBobwhite_ScaffoldedDeNovo_contig_1048	21117
GENSCAN00000009297	NorthernBobwhite_ScaffoldedDeNovo_contig_1048	51941
GENSCAN00000009299	NorthernBobwhite_ScaffoldedDeNovo_contig_1048	105754
GENSCAN00000009301	NorthernBobwhite_ScaffoldedDeNovo_contig_1048	122976
GENSCAN00000009314	NorthernBobwhite_ScaffoldedDeNovo_contig_1048	124159
GENSCAN00000004591	NorthernBobwhite_ScaffoldedDeNovo_contig_1052	13914
GENSCAN00000010810	NorthernBobwhite_ScaffoldedDeNovo_contig_1053	4663
GENSCAN00000033532	NorthernBobwhite_ScaffoldedDeNovo_contig_1054	25747
GENSCAN00000033531	NorthernBobwhite_ScaffoldedDeNovo_contig_1054	58323
GENSCAN00000033517	NorthernBobwhite_ScaffoldedDeNovo_contig_1054	97065
GENSCAN00000006726	NorthernBobwhite_ScaffoldedDeNovo_contig_1055	40314
GENSCAN00000006714	NorthernBobwhite_ScaffoldedDeNovo_contig_1055	54187
GENSCAN00000006711	NorthernBobwhite_ScaffoldedDeNovo_contig_1055	57398
GENSCAN00000018400	NorthernBobwhite_ScaffoldedDeNovo_contig_1058	6586
GENSCAN00000018419	NorthernBobwhite_ScaffoldedDeNovo_contig_1058	28405
GENSCAN00000013885	NorthernBobwhite_ScaffoldedDeNovo_contig_1059	4811
GENSCAN00000013881	NorthernBobwhite_ScaffoldedDeNovo_contig_1059	13975
GENSCAN00000016703	NorthernBobwhite_ScaffoldedDeNovo_contig_1059	29922
GENSCAN00000039898	NorthernBobwhite_ScaffoldedDeNovo_contig_1059	29922
GENSCAN00000013868	NorthernBobwhite_ScaffoldedDeNovo_contig_1059	43238
GENSCAN00000013849	NorthernBobwhite_ScaffoldedDeNovo_contig_1059	53793
GENSCAN00000008011	NorthernBobwhite_ScaffoldedDeNovo_contig_1060	95737
GENSCAN00000008019	NorthernBobwhite_ScaffoldedDeNovo_contig_1060	107308
GENSCAN00000030332	NorthernBobwhite_ScaffoldedDeNovo_contig_1061	22145
GENSCAN00000022600	NorthernBobwhite_ScaffoldedDeNovo_contig_1065	1946
GENSCAN00000022623	NorthernBobwhite_ScaffoldedDeNovo_contig_1065	12405
GENSCAN00000036221	NorthernBobwhite_ScaffoldedDeNovo_contig_1067	24156
GENSCAN00000036222	NorthernBobwhite_ScaffoldedDeNovo_contig_1067	29024
GENSCAN00000005247	NorthernBobwhite_ScaffoldedDeNovo_contig_1068	6910
GENSCAN00000005265	NorthernBobwhite_ScaffoldedDeNovo_contig_1068	38357
GENSCAN00000033781	NorthernBobwhite_ScaffoldedDeNovo_contig_1070	22827
GENSCAN00000033784	NorthernBobwhite_ScaffoldedDeNovo_contig_1070	31045
GENSCAN00000037909	NorthernBobwhite_ScaffoldedDeNovo_contig_1071	6777
GENSCAN00000037928	NorthernBobwhite_ScaffoldedDeNovo_contig_1071	37797
GENSCAN00000006312	NorthernBobwhite_ScaffoldedDeNovo_contig_1073	303
GENSCAN00000029116	NorthernBobwhite_ScaffoldedDeNovo_contig_1074	1651
GENSCAN00000029107	NorthernBobwhite_ScaffoldedDeNovo_contig_1074	60717
GENSCAN00000006362	NorthernBobwhite_ScaffoldedDeNovo_contig_1075	10914
GENSCAN00000006350	NorthernBobwhite_ScaffoldedDeNovo_contig_1075	20982
GENSCAN00000036246	NorthernBobwhite_ScaffoldedDeNovo_contig_1077	73651
GENSCAN00000036251	NorthernBobwhite_ScaffoldedDeNovo_contig_1077	77539
GENSCAN00000036237	NorthernBobwhite_ScaffoldedDeNovo_contig_1077	89989
GENSCAN00000033303	NorthernBobwhite_ScaffoldedDeNovo_contig_1081	3045
GENSCAN00000033281	NorthernBobwhite_ScaffoldedDeNovo_contig_1081	20128
GENSCAN00000017564	NorthernBobwhite_ScaffoldedDeNovo_contig_1082	38753
GENSCAN00000017545	NorthernBobwhite_ScaffoldedDeNovo_contig_1082	75081
GENSCAN00000021680	NorthernBobwhite_ScaffoldedDeNovo_contig_1088	24017
GENSCAN00000021689	NorthernBobwhite_ScaffoldedDeNovo_contig_1088	93676
GENSCAN00000029668	NorthernBobwhite_ScaffoldedDeNovo_contig_1095	36828
GENSCAN00000029674	NorthernBobwhite_ScaffoldedDeNovo_contig_1095	67235
GENSCAN00000034630	NorthernBobwhite_ScaffoldedDeNovo_contig_1096	41475
GENSCAN00000034631	NorthernBobwhite_ScaffoldedDeNovo_contig_1096	42253
GENSCAN00000004881	NorthernBobwhite_ScaffoldedDeNovo_contig_1097	2983
GENSCAN00000004883	NorthernBobwhite_ScaffoldedDeNovo_contig_1097	22922
GENSCAN00000027945	NorthernBobwhite_ScaffoldedDeNovo_contig_1099	1218
GENSCAN00000023772	NorthernBobwhite_ScaffoldedDeNovo_contig_1099	5941
GENSCAN00000008772	NorthernBobwhite_ScaffoldedDeNovo_contig_1099	7059
GENSCAN00000019253	NorthernBobwhite_ScaffoldedDeNovo_contig_1100	4082
GENSCAN00000019241	NorthernBobwhite_ScaffoldedDeNovo_contig_1100	67761
GENSCAN00000019234	NorthernBobwhite_ScaffoldedDeNovo_contig_1100	84364
GENSCAN00000019716	NorthernBobwhite_ScaffoldedDeNovo_contig_1100	138056
GENSCAN00000019721	NorthernBobwhite_ScaffoldedDeNovo_contig_1100	152503
GENSCAN00000004323	NorthernBobwhite_ScaffoldedDeNovo_contig_1101	3632
GENSCAN00000004321	NorthernBobwhite_ScaffoldedDeNovo_contig_1101	6757
GENSCAN00000028085	NorthernBobwhite_ScaffoldedDeNovo_contig_1102	8842
GENSCAN00000028116	NorthernBobwhite_ScaffoldedDeNovo_contig_1102	29154
GENSCAN00000033295	NorthernBobwhite_ScaffoldedDeNovo_contig_1102	56374
GENSCAN00000033307	NorthernBobwhite_ScaffoldedDeNovo_contig_1102	81144
GENSCAN00000004427	NorthernBobwhite_ScaffoldedDeNovo_contig_1104	1067
GENSCAN00000023112	NorthernBobwhite_ScaffoldedDeNovo_contig_1106	36643
GENSCAN00000023115	NorthernBobwhite_ScaffoldedDeNovo_contig_1106	54889
GENSCAN00000023116	NorthernBobwhite_ScaffoldedDeNovo_contig_1106	89312
GENSCAN00000023111	NorthernBobwhite_ScaffoldedDeNovo_contig_1106	96348
GENSCAN00000033099	NorthernBobwhite_ScaffoldedDeNovo_contig_1108	8433
GENSCAN00000038238	NorthernBobwhite_ScaffoldedDeNovo_contig_1109	15442
GENSCAN00000013252	NorthernBobwhite_ScaffoldedDeNovo_contig_1112	52943
GENSCAN00000013247	NorthernBobwhite_ScaffoldedDeNovo_contig_1112	87565
GENSCAN00000004450	NorthernBobwhite_ScaffoldedDeNovo_contig_1114	43738
GENSCAN00000004445	NorthernBobwhite_ScaffoldedDeNovo_contig_1114	48094
GENSCAN00000018685	NorthernBobwhite_ScaffoldedDeNovo_contig_1115	2890
GENSCAN00000018662	NorthernBobwhite_ScaffoldedDeNovo_contig_1115	4418
GENSCAN00000018668	NorthernBobwhite_ScaffoldedDeNovo_contig_1115	54025
GENSCAN00000037405	NorthernBobwhite_ScaffoldedDeNovo_contig_1117	7025
GENSCAN00000037410	NorthernBobwhite_ScaffoldedDeNovo_contig_1117	19815
GENSCAN00000037413	NorthernBobwhite_ScaffoldedDeNovo_contig_1117	29425
GENSCAN00000037404	NorthernBobwhite_ScaffoldedDeNovo_contig_1117	48892
GENSCAN00000037377	NorthernBobwhite_ScaffoldedDeNovo_contig_1117	54706
GENSCAN00000037407	NorthernBobwhite_ScaffoldedDeNovo_contig_1117	73575
GENSCAN00000002476	NorthernBobwhite_ScaffoldedDeNovo_contig_1119	10139
GENSCAN00000031927	NorthernBobwhite_ScaffoldedDeNovo_contig_1119	51524
GENSCAN00000031962	NorthernBobwhite_ScaffoldedDeNovo_contig_1119	67633
GENSCAN00000031954	NorthernBobwhite_ScaffoldedDeNovo_contig_1119	82728
GENSCAN00000031961	NorthernBobwhite_ScaffoldedDeNovo_contig_1119	92472
GENSCAN00000031910	NorthernBobwhite_ScaffoldedDeNovo_contig_1119	109714
GENSCAN00000031909	NorthernBobwhite_ScaffoldedDeNovo_contig_1119	113191
GENSCAN00000000208	NorthernBobwhite_ScaffoldedDeNovo_contig_1121	24409
GENSCAN00000000206	NorthernBobwhite_ScaffoldedDeNovo_contig_1121	34989
GENSCAN00000000210	NorthernBobwhite_ScaffoldedDeNovo_contig_1121	57066
GENSCAN00000000215	NorthernBobwhite_ScaffoldedDeNovo_contig_1121	72649
GENSCAN00000025206	NorthernBobwhite_ScaffoldedDeNovo_contig_1122	24476
GENSCAN00000025218	NorthernBobwhite_ScaffoldedDeNovo_contig_1122	62751
GENSCAN00000025231	NorthernBobwhite_ScaffoldedDeNovo_contig_1122	86342
GENSCAN00000011191	NorthernBobwhite_ScaffoldedDeNovo_contig_1122	103890
GENSCAN00000011189	NorthernBobwhite_ScaffoldedDeNovo_contig_1122	116505
GENSCAN00000011215	NorthernBobwhite_ScaffoldedDeNovo_contig_1122	133639
GENSCAN00000011221	NorthernBobwhite_ScaffoldedDeNovo_contig_1122	149212
GENSCAN00000018209	NorthernBobwhite_ScaffoldedDeNovo_contig_1123	27882
GENSCAN00000018217	NorthernBobwhite_ScaffoldedDeNovo_contig_1123	48643
GENSCAN00000018208	NorthernBobwhite_ScaffoldedDeNovo_contig_1123	69979
GENSCAN00000018206	NorthernBobwhite_ScaffoldedDeNovo_contig_1123	103593
GENSCAN00000018204	NorthernBobwhite_ScaffoldedDeNovo_contig_1123	142629
GENSCAN00000018225	NorthernBobwhite_ScaffoldedDeNovo_contig_1123	165167
GENSCAN00000032026	NorthernBobwhite_ScaffoldedDeNovo_contig_1124	11300
GENSCAN00000032017	NorthernBobwhite_ScaffoldedDeNovo_contig_1124	19441
GENSCAN00000032024	NorthernBobwhite_ScaffoldedDeNovo_contig_1124	36676
GENSCAN00000017407	NorthernBobwhite_ScaffoldedDeNovo_contig_1130	49989
GENSCAN00000029634	NorthernBobwhite_ScaffoldedDeNovo_contig_1130	78602
GENSCAN00000038954	NorthernBobwhite_ScaffoldedDeNovo_contig_1135	115227
GENSCAN00000027377	NorthernBobwhite_ScaffoldedDeNovo_contig_1137	22285
GENSCAN00000027386	NorthernBobwhite_ScaffoldedDeNovo_contig_1137	60007
GENSCAN00000027390	NorthernBobwhite_ScaffoldedDeNovo_contig_1137	115545
GENSCAN00000027391	NorthernBobwhite_ScaffoldedDeNovo_contig_1137	146019
GENSCAN00000027385	NorthernBobwhite_ScaffoldedDeNovo_contig_1137	187658
GENSCAN00000027368	NorthernBobwhite_ScaffoldedDeNovo_contig_1137	217739
GENSCAN00000027389	NorthernBobwhite_ScaffoldedDeNovo_contig_1137	228685
GENSCAN00000027388	NorthernBobwhite_ScaffoldedDeNovo_contig_1137	243751
GENSCAN00000027372	NorthernBobwhite_ScaffoldedDeNovo_contig_1137	254060
GENSCAN00000027373	NorthernBobwhite_ScaffoldedDeNovo_contig_1137	297763
GENSCAN00000020561	NorthernBobwhite_ScaffoldedDeNovo_contig_1138	32032
GENSCAN00000037280	NorthernBobwhite_ScaffoldedDeNovo_contig_1141	2473
GENSCAN00000013299	NorthernBobwhite_ScaffoldedDeNovo_contig_1143	12462
GENSCAN00000010825	NorthernBobwhite_ScaffoldedDeNovo_contig_1144	18242
GENSCAN00000024600	NorthernBobwhite_ScaffoldedDeNovo_contig_1145	5988
GENSCAN00000021535	NorthernBobwhite_ScaffoldedDeNovo_contig_1148	8656
GENSCAN00000009362	NorthernBobwhite_ScaffoldedDeNovo_contig_1155	40538
GENSCAN00000002503	NorthernBobwhite_ScaffoldedDeNovo_contig_1156	2500
GENSCAN00000002480	NorthernBobwhite_ScaffoldedDeNovo_contig_1156	34817
GENSCAN00000002510	NorthernBobwhite_ScaffoldedDeNovo_contig_1156	49352
GENSCAN00000002507	NorthernBobwhite_ScaffoldedDeNovo_contig_1156	95780
GENSCAN00000031333	NorthernBobwhite_ScaffoldedDeNovo_contig_1157	4729
GENSCAN00000031329	NorthernBobwhite_ScaffoldedDeNovo_contig_1157	20889
GENSCAN00000029121	NorthernBobwhite_ScaffoldedDeNovo_contig_1165	2461
GENSCAN00000029117	NorthernBobwhite_ScaffoldedDeNovo_contig_1165	5107
GENSCAN00000029109	NorthernBobwhite_ScaffoldedDeNovo_contig_1165	12624
GENSCAN00000029848	NorthernBobwhite_ScaffoldedDeNovo_contig_1166	47568
GENSCAN00000017381	NorthernBobwhite_ScaffoldedDeNovo_contig_1167	990
GENSCAN00000028154	NorthernBobwhite_ScaffoldedDeNovo_contig_1168	38510
GENSCAN00000028162	NorthernBobwhite_ScaffoldedDeNovo_contig_1168	69954
GENSCAN00000028153	NorthernBobwhite_ScaffoldedDeNovo_contig_1168	83708
GENSCAN00000028160	NorthernBobwhite_ScaffoldedDeNovo_contig_1168	106148
GENSCAN00000028155	NorthernBobwhite_ScaffoldedDeNovo_contig_1168	186554
GENSCAN00000027164	NorthernBobwhite_ScaffoldedDeNovo_contig_1168	233791
GENSCAN00000023800	NorthernBobwhite_ScaffoldedDeNovo_contig_1169	13158
GENSCAN00000023776	NorthernBobwhite_ScaffoldedDeNovo_contig_1169	81922
GENSCAN00000023798	NorthernBobwhite_ScaffoldedDeNovo_contig_1169	98609
GENSCAN00000023803	NorthernBobwhite_ScaffoldedDeNovo_contig_1169	121321
GENSCAN00000015976	NorthernBobwhite_ScaffoldedDeNovo_contig_1171	3362
GENSCAN00000015958	NorthernBobwhite_ScaffoldedDeNovo_contig_1171	31104
GENSCAN00000001908	NorthernBobwhite_ScaffoldedDeNovo_contig_1173	575
GENSCAN00000017697	NorthernBobwhite_ScaffoldedDeNovo_contig_1174	14120
GENSCAN00000017735	NorthernBobwhite_ScaffoldedDeNovo_contig_1174	62938
GENSCAN00000017727	NorthernBobwhite_ScaffoldedDeNovo_contig_1174	70956
GENSCAN00000013939	NorthernBobwhite_ScaffoldedDeNovo_contig_1176	204
GENSCAN00000013945	NorthernBobwhite_ScaffoldedDeNovo_contig_1176	5184
GENSCAN00000013954	NorthernBobwhite_ScaffoldedDeNovo_contig_1176	13985
GENSCAN00000037605	NorthernBobwhite_ScaffoldedDeNovo_contig_1176	41164
GENSCAN00000012189	NorthernBobwhite_ScaffoldedDeNovo_contig_1177	8642
GENSCAN00000012184	NorthernBobwhite_ScaffoldedDeNovo_contig_1177	25126
GENSCAN00000012171	NorthernBobwhite_ScaffoldedDeNovo_contig_1177	57734
GENSCAN00000012173	NorthernBobwhite_ScaffoldedDeNovo_contig_1177	79200
GENSCAN00000003626	NorthernBobwhite_ScaffoldedDeNovo_contig_1179	36391
GENSCAN00000003624	NorthernBobwhite_ScaffoldedDeNovo_contig_1179	46847
GENSCAN00000027726	NorthernBobwhite_ScaffoldedDeNovo_contig_1181	1135
GENSCAN00000029570	NorthernBobwhite_ScaffoldedDeNovo_contig_1185	58989
GENSCAN00000010484	NorthernBobwhite_ScaffoldedDeNovo_contig_1185	84148
GENSCAN00000010489	NorthernBobwhite_ScaffoldedDeNovo_contig_1185	108348
GENSCAN00000038034	NorthernBobwhite_ScaffoldedDeNovo_contig_1186	11425
GENSCAN00000039931	NorthernBobwhite_ScaffoldedDeNovo_contig_1187	6926
GENSCAN00000024301	NorthernBobwhite_ScaffoldedDeNovo_contig_1187	12908
GENSCAN00000036751	NorthernBobwhite_ScaffoldedDeNovo_contig_1190	4869
GENSCAN00000012188	NorthernBobwhite_ScaffoldedDeNovo_contig_1193	20525
GENSCAN00000012166	NorthernBobwhite_ScaffoldedDeNovo_contig_1193	37509
GENSCAN00000012177	NorthernBobwhite_ScaffoldedDeNovo_contig_1193	42026
GENSCAN00000012168	NorthernBobwhite_ScaffoldedDeNovo_contig_1193	75078
GENSCAN00000008683	NorthernBobwhite_ScaffoldedDeNovo_contig_1195	6866
GENSCAN00000020714	NorthernBobwhite_ScaffoldedDeNovo_contig_1196	36805
GENSCAN00000001614	NorthernBobwhite_ScaffoldedDeNovo_contig_1197	2511
GENSCAN00000001625	NorthernBobwhite_ScaffoldedDeNovo_contig_1197	42668
GENSCAN00000001627	NorthernBobwhite_ScaffoldedDeNovo_contig_1197	73126
GENSCAN00000017514	NorthernBobwhite_ScaffoldedDeNovo_contig_1198	35934
GENSCAN00000017516	NorthernBobwhite_ScaffoldedDeNovo_contig_1198	78268
GENSCAN00000025321	NorthernBobwhite_ScaffoldedDeNovo_contig_1198	88199
GENSCAN00000031603	NorthernBobwhite_ScaffoldedDeNovo_contig_1201	28470
GENSCAN00000024664	NorthernBobwhite_ScaffoldedDeNovo_contig_1202	3889
GENSCAN00000024652	NorthernBobwhite_ScaffoldedDeNovo_contig_1202	35497
GENSCAN00000024654	NorthernBobwhite_ScaffoldedDeNovo_contig_1202	44714
GENSCAN00000016672	NorthernBobwhite_ScaffoldedDeNovo_contig_1202	74878
GENSCAN00000016660	NorthernBobwhite_ScaffoldedDeNovo_contig_1202	88468
GENSCAN00000016696	NorthernBobwhite_ScaffoldedDeNovo_contig_1202	98588
GENSCAN00000016670	NorthernBobwhite_ScaffoldedDeNovo_contig_1202	170248
GENSCAN00000016680	NorthernBobwhite_ScaffoldedDeNovo_contig_1202	192505
GENSCAN00000032518	NorthernBobwhite_ScaffoldedDeNovo_contig_1203	14176
GENSCAN00000026614	NorthernBobwhite_ScaffoldedDeNovo_contig_1206	38
GENSCAN00000008204	NorthernBobwhite_ScaffoldedDeNovo_contig_1206	38
GENSCAN00000019324	NorthernBobwhite_ScaffoldedDeNovo_contig_1206	38
GENSCAN00000025689	NorthernBobwhite_ScaffoldedDeNovo_contig_1206	38
GENSCAN00000027091	NorthernBobwhite_ScaffoldedDeNovo_contig_1206	38
GENSCAN00000028768	NorthernBobwhite_ScaffoldedDeNovo_contig_1206	195
GENSCAN00000030896	NorthernBobwhite_ScaffoldedDeNovo_contig_1206	195
GENSCAN00000001593	NorthernBobwhite_ScaffoldedDeNovo_contig_1206	195
GENSCAN00000037276	NorthernBobwhite_ScaffoldedDeNovo_contig_1206	195
GENSCAN00000024434	NorthernBobwhite_ScaffoldedDeNovo_contig_1206	195
GENSCAN00000024443	NorthernBobwhite_ScaffoldedDeNovo_contig_1206	195
GENSCAN00000024458	NorthernBobwhite_ScaffoldedDeNovo_contig_1206	195
GENSCAN00000028794	NorthernBobwhite_ScaffoldedDeNovo_contig_1206	195
GENSCAN00000001580	NorthernBobwhite_ScaffoldedDeNovo_contig_1206	195
GENSCAN00000027093	NorthernBobwhite_ScaffoldedDeNovo_contig_1206	195
GENSCAN00000000904	NorthernBobwhite_ScaffoldedDeNovo_contig_1206	195
GENSCAN00000018525	NorthernBobwhite_ScaffoldedDeNovo_contig_1206	195
GENSCAN00000023081	NorthernBobwhite_ScaffoldedDeNovo_contig_1206	195
GENSCAN00000019660	NorthernBobwhite_ScaffoldedDeNovo_contig_1206	195
GENSCAN00000039474	NorthernBobwhite_ScaffoldedDeNovo_contig_1206	195
GENSCAN00000024446	NorthernBobwhite_ScaffoldedDeNovo_contig_1206	195
GENSCAN00000028775	NorthernBobwhite_ScaffoldedDeNovo_contig_1206	195
[truncated: 25,311 more rows]

## Sheet: Sheet1
GENSCAN00000027144	*
GENSCAN00000034937	*
GENSCAN00000004808	*
GENSCAN00000029569	*
