# Supplementary material for: A Draft De Novo Genome Assembly for the Northern Bobwhite (Colinus virginianus) Reveals Evidence for a Rapid Decline in Effective Population Size Beginning in the Late Pleistocene
Source: PLoS One. 2014 Mar 12;9(3):e90240. doi: 10.1371/journal.pone.0090240 (PMC3951200; doi:10.1371/journal.pone.0090240)
Supplement: Table S10 — Bobwhite cDNA Contig Map Positions in NB1.1. (XLSX) [file pone.0090240.s010.xlsx]

## Sheet: BobwhiteTranscriptMapping
Table S10 Bobwhite cDNA Contig Map Positions in NB1.1
Bobwhite de novo (cDNA) Transcript Contig ID	NB1.1 Contig ID	Transcript Start Position in NB1.1
SRR036708__contig_21145	NorthernBobwhite_ScaffoldedDeNovo_contig_6	124194
SRR036708__contig_7695	NorthernBobwhite_ScaffoldedDeNovo_contig_6	129626
SRR036708__contig_20888	NorthernBobwhite_ScaffoldedDeNovo_contig_6	132016
SRR036708__contig_2173	NorthernBobwhite_ScaffoldedDeNovo_contig_6	132660
SRR036708__contig_15934	NorthernBobwhite_ScaffoldedDeNovo_contig_8	67211
SRR036708__contig_13033	NorthernBobwhite_ScaffoldedDeNovo_contig_8	67585
SRR036708__contig_14349	NorthernBobwhite_ScaffoldedDeNovo_contig_11	6532
SRR036708__contig_6536	NorthernBobwhite_ScaffoldedDeNovo_contig_16	1390
SRR036708__contig_6638	NorthernBobwhite_ScaffoldedDeNovo_contig_23	12236
SRR036708__contig_19449	NorthernBobwhite_ScaffoldedDeNovo_contig_23	67050
SRR036708__contig_16568	NorthernBobwhite_ScaffoldedDeNovo_contig_23	85869
SRR036708__contig_5593	NorthernBobwhite_ScaffoldedDeNovo_contig_23	93015
SRR036708__contig_1940	NorthernBobwhite_ScaffoldedDeNovo_contig_24	206
SRR036708__contig_3389	NorthernBobwhite_ScaffoldedDeNovo_contig_24	3916
SRR036708__contig_12413	NorthernBobwhite_ScaffoldedDeNovo_contig_24	6207
SRR036708__contig_13280	NorthernBobwhite_ScaffoldedDeNovo_contig_25	6615
SRR036708__contig_10771	NorthernBobwhite_ScaffoldedDeNovo_contig_25	15281
SRR036708__contig_4984	NorthernBobwhite_ScaffoldedDeNovo_contig_25	18958
SRR036708__contig_14725	NorthernBobwhite_ScaffoldedDeNovo_contig_25	48558
SRR036708__contig_824	NorthernBobwhite_ScaffoldedDeNovo_contig_25	48707
SRR036708__contig_11282	NorthernBobwhite_ScaffoldedDeNovo_contig_26	4781
SRR036708__contig_14829	NorthernBobwhite_ScaffoldedDeNovo_contig_26	5595
SRR036708__contig_19976	NorthernBobwhite_ScaffoldedDeNovo_contig_26	30466
SRR036708__contig_11947	NorthernBobwhite_ScaffoldedDeNovo_contig_26	30697
SRR036708__contig_13130	NorthernBobwhite_ScaffoldedDeNovo_contig_26	31615
SRR036708__contig_3558	NorthernBobwhite_ScaffoldedDeNovo_contig_26	32638
SRR036708__contig_11221	NorthernBobwhite_ScaffoldedDeNovo_contig_26	63359
SRR036708__contig_3004	NorthernBobwhite_ScaffoldedDeNovo_contig_26	69455
SRR036708__contig_9639	NorthernBobwhite_ScaffoldedDeNovo_contig_26	78633
SRR036708__contig_10982	NorthernBobwhite_ScaffoldedDeNovo_contig_26	79391
SRR036708__contig_16208	NorthernBobwhite_ScaffoldedDeNovo_contig_26	87718
SRR036708__contig_3375	NorthernBobwhite_ScaffoldedDeNovo_contig_26	114937
SRR036708__contig_19137	NorthernBobwhite_ScaffoldedDeNovo_contig_26	133258
SRR036708__contig_13638	NorthernBobwhite_ScaffoldedDeNovo_contig_29	4608
SRR036708__contig_12569	NorthernBobwhite_ScaffoldedDeNovo_contig_29	4877
SRR036708__contig_12795	NorthernBobwhite_ScaffoldedDeNovo_contig_29	61247
SRR036708__contig_11099	NorthernBobwhite_ScaffoldedDeNovo_contig_29	61853
SRR036708__contig_6472	NorthernBobwhite_ScaffoldedDeNovo_contig_30	24151
SRR036708__contig_10310	NorthernBobwhite_ScaffoldedDeNovo_contig_30	24572
SRR036708__contig_5850	NorthernBobwhite_ScaffoldedDeNovo_contig_30	55482
SRR036708__contig_7348	NorthernBobwhite_ScaffoldedDeNovo_contig_30	62841
SRR036708__contig_9079	NorthernBobwhite_ScaffoldedDeNovo_contig_30	63965
SRR036708__contig_15152	NorthernBobwhite_ScaffoldedDeNovo_contig_30	224772
SRR036708__contig_18836	NorthernBobwhite_ScaffoldedDeNovo_contig_30	439154
SRR036708__contig_347	NorthernBobwhite_ScaffoldedDeNovo_contig_30	440418
SRR036708__contig_12380	NorthernBobwhite_ScaffoldedDeNovo_contig_31	907
SRR036708__contig_2773	NorthernBobwhite_ScaffoldedDeNovo_contig_38	12667
SRR036708__contig_9535	NorthernBobwhite_ScaffoldedDeNovo_contig_40	487
SRR036708__contig_16408	NorthernBobwhite_ScaffoldedDeNovo_contig_40	1560
SRR036708__contig_2001	NorthernBobwhite_ScaffoldedDeNovo_contig_40	5235
SRR036708__contig_19595	NorthernBobwhite_ScaffoldedDeNovo_contig_45	245664
SRR036708__contig_19404	NorthernBobwhite_ScaffoldedDeNovo_contig_45	299212
SRR036708__contig_4264	NorthernBobwhite_ScaffoldedDeNovo_contig_45	334450
SRR036708__contig_2467	NorthernBobwhite_ScaffoldedDeNovo_contig_45	351576
SRR036708__contig_5159	NorthernBobwhite_ScaffoldedDeNovo_contig_45	352888
SRR036708__contig_2583	NorthernBobwhite_ScaffoldedDeNovo_contig_45	353686
SRR036708__contig_16680	NorthernBobwhite_ScaffoldedDeNovo_contig_45	360494
SRR036708__contig_13624	NorthernBobwhite_ScaffoldedDeNovo_contig_45	535849
SRR036708__contig_5554	NorthernBobwhite_ScaffoldedDeNovo_contig_45	537850
SRR036708__contig_15936	NorthernBobwhite_ScaffoldedDeNovo_contig_45	547862
SRR036708__contig_16399	NorthernBobwhite_ScaffoldedDeNovo_contig_47	2370
SRR036708__contig_16398	NorthernBobwhite_ScaffoldedDeNovo_contig_47	2492
SRR036708__contig_14646	NorthernBobwhite_ScaffoldedDeNovo_contig_47	3125
SRR036708__contig_16357	NorthernBobwhite_ScaffoldedDeNovo_contig_47	5835
SRR036708__contig_5700	NorthernBobwhite_ScaffoldedDeNovo_contig_61	42550
SRR036708__contig_5232	NorthernBobwhite_ScaffoldedDeNovo_contig_61	43498
SRR036708__contig_19463	NorthernBobwhite_ScaffoldedDeNovo_contig_62	15069
SRR036708__contig_12362	NorthernBobwhite_ScaffoldedDeNovo_contig_62	19025
SRR036708__contig_7670	NorthernBobwhite_ScaffoldedDeNovo_contig_64	17887
SRR036708__contig_20264	NorthernBobwhite_ScaffoldedDeNovo_contig_65	43350
SRR036708__contig_8074	NorthernBobwhite_ScaffoldedDeNovo_contig_74	16871
SRR036708__contig_20374	NorthernBobwhite_ScaffoldedDeNovo_contig_74	25183
SRR036708__contig_21079	NorthernBobwhite_ScaffoldedDeNovo_contig_74	27545
SRR036708__contig_10060	NorthernBobwhite_ScaffoldedDeNovo_contig_75	8976
SRR036708__contig_16496	NorthernBobwhite_ScaffoldedDeNovo_contig_80	36244
SRR036708__contig_18909	NorthernBobwhite_ScaffoldedDeNovo_contig_80	37733
SRR036708__contig_13771	NorthernBobwhite_ScaffoldedDeNovo_contig_83	21058
SRR036708__contig_19791	NorthernBobwhite_ScaffoldedDeNovo_contig_83	21500
SRR036708__contig_18488	NorthernBobwhite_ScaffoldedDeNovo_contig_85	2150
SRR036708__contig_15355	NorthernBobwhite_ScaffoldedDeNovo_contig_85	16822
SRR036708__contig_4569	NorthernBobwhite_ScaffoldedDeNovo_contig_85	17780
SRR036708__contig_17433	NorthernBobwhite_ScaffoldedDeNovo_contig_88	24485
SRR036708__contig_4868	NorthernBobwhite_ScaffoldedDeNovo_contig_89	2658
SRR036708__contig_10299	NorthernBobwhite_ScaffoldedDeNovo_contig_89	5920
SRR036708__contig_4585	NorthernBobwhite_ScaffoldedDeNovo_contig_89	8712
SRR036708__contig_6164	NorthernBobwhite_ScaffoldedDeNovo_contig_89	19934
SRR036708__contig_1976	NorthernBobwhite_ScaffoldedDeNovo_contig_90	156077
SRR036708__contig_19401	NorthernBobwhite_ScaffoldedDeNovo_contig_90	159702
SRR036708__contig_11051	NorthernBobwhite_ScaffoldedDeNovo_contig_90	160011
SRR036708__contig_18605	NorthernBobwhite_ScaffoldedDeNovo_contig_90	171234
SRR036708__contig_4733	NorthernBobwhite_ScaffoldedDeNovo_contig_91	23307
SRR036708__contig_14323	NorthernBobwhite_ScaffoldedDeNovo_contig_91	57572
SRR036708__contig_11657	NorthernBobwhite_ScaffoldedDeNovo_contig_91	58951
SRR036708__contig_4906	NorthernBobwhite_ScaffoldedDeNovo_contig_91	59423
SRR036708__contig_5420	NorthernBobwhite_ScaffoldedDeNovo_contig_92	1090
SRR036708__contig_2515	NorthernBobwhite_ScaffoldedDeNovo_contig_94	29198
SRR036708__contig_16107	NorthernBobwhite_ScaffoldedDeNovo_contig_100	2601
SRR036708__contig_5092	NorthernBobwhite_ScaffoldedDeNovo_contig_100	36542
SRR036708__contig_5515	NorthernBobwhite_ScaffoldedDeNovo_contig_100	39396
SRR036708__contig_12187	NorthernBobwhite_ScaffoldedDeNovo_contig_104	2537
SRR036708__contig_7858	NorthernBobwhite_ScaffoldedDeNovo_contig_104	2773
SRR036708__contig_2935	NorthernBobwhite_ScaffoldedDeNovo_contig_104	5566
SRR036708__contig_14107	NorthernBobwhite_ScaffoldedDeNovo_contig_104	14752
SRR036708__contig_7303	NorthernBobwhite_ScaffoldedDeNovo_contig_104	72204
SRR036708__contig_18559	NorthernBobwhite_ScaffoldedDeNovo_contig_106	22185
SRR036708__contig_18707	NorthernBobwhite_ScaffoldedDeNovo_contig_109	18863
SRR036708__contig_15368	NorthernBobwhite_ScaffoldedDeNovo_contig_109	34043
SRR036708__contig_12678	NorthernBobwhite_ScaffoldedDeNovo_contig_109	40556
SRR036708__contig_1981	NorthernBobwhite_ScaffoldedDeNovo_contig_109	41902
SRR036708__contig_3925	NorthernBobwhite_ScaffoldedDeNovo_contig_110	13796
SRR036708__contig_16851	NorthernBobwhite_ScaffoldedDeNovo_contig_110	14324
SRR036708__contig_14443	NorthernBobwhite_ScaffoldedDeNovo_contig_110	32769
SRR036708__contig_14335	NorthernBobwhite_ScaffoldedDeNovo_contig_112	24634
SRR036708__contig_749	NorthernBobwhite_ScaffoldedDeNovo_contig_112	37576
SRR036708__contig_4779	NorthernBobwhite_ScaffoldedDeNovo_contig_112	49681
SRR036708__contig_19254	NorthernBobwhite_ScaffoldedDeNovo_contig_112	72344
SRR036708__contig_11506	NorthernBobwhite_ScaffoldedDeNovo_contig_112	87319
SRR036708__contig_13455	NorthernBobwhite_ScaffoldedDeNovo_contig_112	93887
SRR036708__contig_13770	NorthernBobwhite_ScaffoldedDeNovo_contig_112	106304
SRR036708__contig_9198	NorthernBobwhite_ScaffoldedDeNovo_contig_112	111373
SRR036708__contig_5109	NorthernBobwhite_ScaffoldedDeNovo_contig_112	142163
SRR036708__contig_324	NorthernBobwhite_ScaffoldedDeNovo_contig_112	145918
SRR036708__contig_5908	NorthernBobwhite_ScaffoldedDeNovo_contig_112	163045
SRR036708__contig_5909	NorthernBobwhite_ScaffoldedDeNovo_contig_112	164198
SRR036708__contig_1003	NorthernBobwhite_ScaffoldedDeNovo_contig_112	166456
SRR036708__contig_19743	NorthernBobwhite_ScaffoldedDeNovo_contig_114	6768
SRR036708__contig_6857	NorthernBobwhite_ScaffoldedDeNovo_contig_116	15287
SRR036708__contig_4486	NorthernBobwhite_ScaffoldedDeNovo_contig_116	23799
SRR036708__contig_14505	NorthernBobwhite_ScaffoldedDeNovo_contig_116	27310
SRR036708__contig_20092	NorthernBobwhite_ScaffoldedDeNovo_contig_118	28727
SRR036708__contig_11296	NorthernBobwhite_ScaffoldedDeNovo_contig_118	41592
SRR036708__contig_13067	NorthernBobwhite_ScaffoldedDeNovo_contig_118	51281
SRR036708__contig_2494	NorthernBobwhite_ScaffoldedDeNovo_contig_118	53350
SRR036708__contig_4555	NorthernBobwhite_ScaffoldedDeNovo_contig_118	53615
SRR036708__contig_17886	NorthernBobwhite_ScaffoldedDeNovo_contig_123	29352
SRR036708__contig_18983	NorthernBobwhite_ScaffoldedDeNovo_contig_124	71444
SRR036708__contig_18173	NorthernBobwhite_ScaffoldedDeNovo_contig_124	71954
SRR036708__contig_17685	NorthernBobwhite_ScaffoldedDeNovo_contig_124	77180
SRR036708__contig_9738	NorthernBobwhite_ScaffoldedDeNovo_contig_124	124522
SRR036708__contig_17682	NorthernBobwhite_ScaffoldedDeNovo_contig_125	1288
SRR036708__contig_7665	NorthernBobwhite_ScaffoldedDeNovo_contig_127	8975
SRR036708__contig_1609	NorthernBobwhite_ScaffoldedDeNovo_contig_127	28207
SRR036708__contig_16063	NorthernBobwhite_ScaffoldedDeNovo_contig_131	3091
SRR036708__contig_2347	NorthernBobwhite_ScaffoldedDeNovo_contig_131	4154
SRR036708__contig_4865	NorthernBobwhite_ScaffoldedDeNovo_contig_131	21118
SRR036708__contig_2835	NorthernBobwhite_ScaffoldedDeNovo_contig_131	21761
SRR036708__contig_3043	NorthernBobwhite_ScaffoldedDeNovo_contig_131	23992
SRR036708__contig_19802	NorthernBobwhite_ScaffoldedDeNovo_contig_133	20132
SRR036708__contig_15832	NorthernBobwhite_ScaffoldedDeNovo_contig_133	40775
SRR036708__contig_6608	NorthernBobwhite_ScaffoldedDeNovo_contig_133	41645
SRR036708__contig_8047	NorthernBobwhite_ScaffoldedDeNovo_contig_133	49028
SRR036708__contig_15201	NorthernBobwhite_ScaffoldedDeNovo_contig_133	57194
SRR036708__contig_9091	NorthernBobwhite_ScaffoldedDeNovo_contig_133	57397
SRR036708__contig_6223	NorthernBobwhite_ScaffoldedDeNovo_contig_133	76136
SRR036708__contig_14638	NorthernBobwhite_ScaffoldedDeNovo_contig_133	87777
SRR036708__contig_4494	NorthernBobwhite_ScaffoldedDeNovo_contig_133	89008
SRR036708__contig_15820	NorthernBobwhite_ScaffoldedDeNovo_contig_133	156025
SRR036708__contig_4266	NorthernBobwhite_ScaffoldedDeNovo_contig_133	156561
SRR036708__contig_8763	NorthernBobwhite_ScaffoldedDeNovo_contig_134	50884
SRR036708__contig_6839	NorthernBobwhite_ScaffoldedDeNovo_contig_134	83741
SRR036708__contig_2313	NorthernBobwhite_ScaffoldedDeNovo_contig_134	87694
SRR036708__contig_17009	NorthernBobwhite_ScaffoldedDeNovo_contig_137	85948
SRR036708__contig_18994	NorthernBobwhite_ScaffoldedDeNovo_contig_137	89685
SRR036708__contig_5614	NorthernBobwhite_ScaffoldedDeNovo_contig_137	116602
SRR036708__contig_4503	NorthernBobwhite_ScaffoldedDeNovo_contig_139	13208
SRR036708__contig_13890	NorthernBobwhite_ScaffoldedDeNovo_contig_139	72306
SRR036708__contig_156	NorthernBobwhite_ScaffoldedDeNovo_contig_140	528
SRR036708__contig_2126	NorthernBobwhite_ScaffoldedDeNovo_contig_140	2332
SRR036708__contig_744	NorthernBobwhite_ScaffoldedDeNovo_contig_140	3618
SRR036708__contig_1145	NorthernBobwhite_ScaffoldedDeNovo_contig_140	4666
SRR036708__contig_940	NorthernBobwhite_ScaffoldedDeNovo_contig_140	6371
SRR036708__contig_2706	NorthernBobwhite_ScaffoldedDeNovo_contig_140	7656
SRR036708__contig_115	NorthernBobwhite_ScaffoldedDeNovo_contig_140	8951
SRR036708__contig_36	NorthernBobwhite_ScaffoldedDeNovo_contig_140	10643
SRR036708__contig_1531	NorthernBobwhite_ScaffoldedDeNovo_contig_140	11398
SRR036708__contig_461	NorthernBobwhite_ScaffoldedDeNovo_contig_140	12237
SRR036708__contig_1404	NorthernBobwhite_ScaffoldedDeNovo_contig_140	13570
SRR036708__contig_2769	NorthernBobwhite_ScaffoldedDeNovo_contig_142	30679
SRR036708__contig_15786	NorthernBobwhite_ScaffoldedDeNovo_contig_142	32173
SRR036708__contig_15104	NorthernBobwhite_ScaffoldedDeNovo_contig_142	34464
SRR036708__contig_15460	NorthernBobwhite_ScaffoldedDeNovo_contig_142	74288
SRR036708__contig_18581	NorthernBobwhite_ScaffoldedDeNovo_contig_142	81660
SRR036708__contig_7396	NorthernBobwhite_ScaffoldedDeNovo_contig_142	82923
SRR036708__contig_17678	NorthernBobwhite_ScaffoldedDeNovo_contig_145	13175
SRR036708__contig_11610	NorthernBobwhite_ScaffoldedDeNovo_contig_145	47637
SRR036708__contig_18371	NorthernBobwhite_ScaffoldedDeNovo_contig_147	20297
SRR036708__contig_11638	NorthernBobwhite_ScaffoldedDeNovo_contig_150	12565
SRR036708__contig_14339	NorthernBobwhite_ScaffoldedDeNovo_contig_150	40829
SRR036708__contig_14708	NorthernBobwhite_ScaffoldedDeNovo_contig_150	53711
SRR036708__contig_4257	NorthernBobwhite_ScaffoldedDeNovo_contig_151	36051
SRR036708__contig_7975	NorthernBobwhite_ScaffoldedDeNovo_contig_155	9579
SRR036708__contig_10898	NorthernBobwhite_ScaffoldedDeNovo_contig_155	10805
SRR036708__contig_7410	NorthernBobwhite_ScaffoldedDeNovo_contig_155	14795
SRR036708__contig_16081	NorthernBobwhite_ScaffoldedDeNovo_contig_155	23753
SRR036708__contig_12931	NorthernBobwhite_ScaffoldedDeNovo_contig_156	30778
SRR036708__contig_703	NorthernBobwhite_ScaffoldedDeNovo_contig_156	36682
SRR036708__contig_3767	NorthernBobwhite_ScaffoldedDeNovo_contig_157	6430
SRR036708__contig_1658	NorthernBobwhite_ScaffoldedDeNovo_contig_157	12370
SRR036708__contig_9829	NorthernBobwhite_ScaffoldedDeNovo_contig_157	54054
SRR036708__contig_1321	NorthernBobwhite_ScaffoldedDeNovo_contig_157	57366
SRR036708__contig_17486	NorthernBobwhite_ScaffoldedDeNovo_contig_157	60993
SRR036708__contig_16140	NorthernBobwhite_ScaffoldedDeNovo_contig_157	61607
SRR036708__contig_5467	NorthernBobwhite_ScaffoldedDeNovo_contig_161	530
SRR036708__contig_2128	NorthernBobwhite_ScaffoldedDeNovo_contig_161	11111
SRR036708__contig_2377	NorthernBobwhite_ScaffoldedDeNovo_contig_161	52603
SRR036708__contig_18470	NorthernBobwhite_ScaffoldedDeNovo_contig_165	2857
SRR036708__contig_14020	NorthernBobwhite_ScaffoldedDeNovo_contig_165	5569
SRR036708__contig_5711	NorthernBobwhite_ScaffoldedDeNovo_contig_165	6336
SRR036708__contig_11095	NorthernBobwhite_ScaffoldedDeNovo_contig_165	6689
SRR036708__contig_17065	NorthernBobwhite_ScaffoldedDeNovo_contig_165	7537
SRR036708__contig_12705	NorthernBobwhite_ScaffoldedDeNovo_contig_165	10846
SRR036708__contig_11085	NorthernBobwhite_ScaffoldedDeNovo_contig_165	11494
SRR036708__contig_17890	NorthernBobwhite_ScaffoldedDeNovo_contig_165	65786
SRR036708__contig_19048	NorthernBobwhite_ScaffoldedDeNovo_contig_166	82945
SRR036708__contig_19368	NorthernBobwhite_ScaffoldedDeNovo_contig_168	14528
SRR036708__contig_11314	NorthernBobwhite_ScaffoldedDeNovo_contig_168	30328
SRR036708__contig_3023	NorthernBobwhite_ScaffoldedDeNovo_contig_168	51289
SRR036708__contig_10772	NorthernBobwhite_ScaffoldedDeNovo_contig_168	57952
SRR036708__contig_2595	NorthernBobwhite_ScaffoldedDeNovo_contig_168	67508
SRR036708__contig_898	NorthernBobwhite_ScaffoldedDeNovo_contig_168	84079
SRR036708__contig_543	NorthernBobwhite_ScaffoldedDeNovo_contig_168	90681
SRR036708__contig_3248	NorthernBobwhite_ScaffoldedDeNovo_contig_173	42304
SRR036708__contig_19045	NorthernBobwhite_ScaffoldedDeNovo_contig_173	47437
SRR036708__contig_2622	NorthernBobwhite_ScaffoldedDeNovo_contig_173	49725
SRR036708__contig_16226	NorthernBobwhite_ScaffoldedDeNovo_contig_173	50682
SRR036708__contig_6652	NorthernBobwhite_ScaffoldedDeNovo_contig_173	51679
SRR036708__contig_17661	NorthernBobwhite_ScaffoldedDeNovo_contig_173	69982
SRR036708__contig_5538	NorthernBobwhite_ScaffoldedDeNovo_contig_180	1145
SRR036708__contig_1983	NorthernBobwhite_ScaffoldedDeNovo_contig_180	1656
SRR036708__contig_873	NorthernBobwhite_ScaffoldedDeNovo_contig_185	29461
SRR036708__contig_4047	NorthernBobwhite_ScaffoldedDeNovo_contig_185	35196
SRR036708__contig_13376	NorthernBobwhite_ScaffoldedDeNovo_contig_185	44595
SRR036708__contig_12157	NorthernBobwhite_ScaffoldedDeNovo_contig_189	3954
SRR036708__contig_17278	NorthernBobwhite_ScaffoldedDeNovo_contig_189	8396
SRR036708__contig_18787	NorthernBobwhite_ScaffoldedDeNovo_contig_189	10651
SRR036708__contig_14292	NorthernBobwhite_ScaffoldedDeNovo_contig_190	64212
SRR036708__contig_12657	NorthernBobwhite_ScaffoldedDeNovo_contig_190	64579
SRR036708__contig_470	NorthernBobwhite_ScaffoldedDeNovo_contig_190	108738
SRR036708__contig_14225	NorthernBobwhite_ScaffoldedDeNovo_contig_190	118228
SRR036708__contig_4705	NorthernBobwhite_ScaffoldedDeNovo_contig_190	130260
SRR036708__contig_13511	NorthernBobwhite_ScaffoldedDeNovo_contig_190	166527
SRR036708__contig_8513	NorthernBobwhite_ScaffoldedDeNovo_contig_190	174947
SRR036708__contig_18551	NorthernBobwhite_ScaffoldedDeNovo_contig_190	184318
SRR036708__contig_19302	NorthernBobwhite_ScaffoldedDeNovo_contig_192	25744
SRR036708__contig_14265	NorthernBobwhite_ScaffoldedDeNovo_contig_196	66109
SRR036708__contig_441	NorthernBobwhite_ScaffoldedDeNovo_contig_196	73353
SRR036708__contig_5034	NorthernBobwhite_ScaffoldedDeNovo_contig_196	83074
SRR036708__contig_3265	NorthernBobwhite_ScaffoldedDeNovo_contig_197	6665
SRR036708__contig_17340	NorthernBobwhite_ScaffoldedDeNovo_contig_197	14113
SRR036708__contig_5376	NorthernBobwhite_ScaffoldedDeNovo_contig_197	19735
SRR036708__contig_7014	NorthernBobwhite_ScaffoldedDeNovo_contig_197	35221
SRR036708__contig_11517	NorthernBobwhite_ScaffoldedDeNovo_contig_198	28644
SRR036708__contig_14565	NorthernBobwhite_ScaffoldedDeNovo_contig_198	148165
SRR036708__contig_10957	NorthernBobwhite_ScaffoldedDeNovo_contig_198	158552
SRR036708__contig_10824	NorthernBobwhite_ScaffoldedDeNovo_contig_198	158906
SRR036708__contig_8653	NorthernBobwhite_ScaffoldedDeNovo_contig_198	160199
SRR036708__contig_20015	NorthernBobwhite_ScaffoldedDeNovo_contig_198	163055
SRR036708__contig_7376	NorthernBobwhite_ScaffoldedDeNovo_contig_199	2089
SRR036708__contig_1236	NorthernBobwhite_ScaffoldedDeNovo_contig_202	36270
SRR036708__contig_456	NorthernBobwhite_ScaffoldedDeNovo_contig_202	40617
SRR036708__contig_457	NorthernBobwhite_ScaffoldedDeNovo_contig_202	40908
SRR036708__contig_12711	NorthernBobwhite_ScaffoldedDeNovo_contig_202	43001
SRR036708__contig_21097	NorthernBobwhite_ScaffoldedDeNovo_contig_202	57274
SRR036708__contig_18814	NorthernBobwhite_ScaffoldedDeNovo_contig_202	63308
SRR036708__contig_3044	NorthernBobwhite_ScaffoldedDeNovo_contig_202	65966
SRR036708__contig_8547	NorthernBobwhite_ScaffoldedDeNovo_contig_202	69101
SRR036708__contig_12435	NorthernBobwhite_ScaffoldedDeNovo_contig_202	72135
SRR036708__contig_18682	NorthernBobwhite_ScaffoldedDeNovo_contig_205	57091
SRR036708__contig_12955	NorthernBobwhite_ScaffoldedDeNovo_contig_205	78783
SRR036708__contig_17024	NorthernBobwhite_ScaffoldedDeNovo_contig_205	82411
SRR036708__contig_19184	NorthernBobwhite_ScaffoldedDeNovo_contig_205	100450
SRR036708__contig_16643	NorthernBobwhite_ScaffoldedDeNovo_contig_206	4095
SRR036708__contig_3187	NorthernBobwhite_ScaffoldedDeNovo_contig_208	1383
SRR036708__contig_18968	NorthernBobwhite_ScaffoldedDeNovo_contig_208	1549
SRR036708__contig_7940	NorthernBobwhite_ScaffoldedDeNovo_contig_208	7506
SRR036708__contig_7039	NorthernBobwhite_ScaffoldedDeNovo_contig_212	573
SRR036708__contig_7040	NorthernBobwhite_ScaffoldedDeNovo_contig_212	1760
SRR036708__contig_13453	NorthernBobwhite_ScaffoldedDeNovo_contig_214	316
SRR036708__contig_2043	NorthernBobwhite_ScaffoldedDeNovo_contig_214	1244
SRR036708__contig_6207	NorthernBobwhite_ScaffoldedDeNovo_contig_214	5409
SRR036708__contig_7467	NorthernBobwhite_ScaffoldedDeNovo_contig_220	38720
SRR036708__contig_4245	NorthernBobwhite_ScaffoldedDeNovo_contig_220	39211
SRR036708__contig_18982	NorthernBobwhite_ScaffoldedDeNovo_contig_220	40590
SRR036708__contig_6776	NorthernBobwhite_ScaffoldedDeNovo_contig_220	71719
SRR036708__contig_17926	NorthernBobwhite_ScaffoldedDeNovo_contig_220	85743
SRR036708__contig_17001	NorthernBobwhite_ScaffoldedDeNovo_contig_223	41033
SRR036708__contig_20384	NorthernBobwhite_ScaffoldedDeNovo_contig_229	1088
SRR036708__contig_16618	NorthernBobwhite_ScaffoldedDeNovo_contig_229	56253
SRR036708__contig_15020	NorthernBobwhite_ScaffoldedDeNovo_contig_230	18466
SRR036708__contig_4202	NorthernBobwhite_ScaffoldedDeNovo_contig_232	17237
SRR036708__contig_14896	NorthernBobwhite_ScaffoldedDeNovo_contig_232	17958
SRR036708__contig_6232	NorthernBobwhite_ScaffoldedDeNovo_contig_232	18940
SRR036708__contig_20201	NorthernBobwhite_ScaffoldedDeNovo_contig_232	20533
SRR036708__contig_20845	NorthernBobwhite_ScaffoldedDeNovo_contig_232	37139
SRR036708__contig_21096	NorthernBobwhite_ScaffoldedDeNovo_contig_232	37665
SRR036708__contig_3955	NorthernBobwhite_ScaffoldedDeNovo_contig_232	38709
SRR036708__contig_4639	NorthernBobwhite_ScaffoldedDeNovo_contig_235	3798
SRR036708__contig_1807	NorthernBobwhite_ScaffoldedDeNovo_contig_235	4567
SRR036708__contig_18884	NorthernBobwhite_ScaffoldedDeNovo_contig_235	4828
SRR036708__contig_15099	NorthernBobwhite_ScaffoldedDeNovo_contig_239	6393
SRR036708__contig_598	NorthernBobwhite_ScaffoldedDeNovo_contig_239	39651
SRR036708__contig_2634	NorthernBobwhite_ScaffoldedDeNovo_contig_239	97691
SRR036708__contig_20835	NorthernBobwhite_ScaffoldedDeNovo_contig_239	99891
SRR036708__contig_6725	NorthernBobwhite_ScaffoldedDeNovo_contig_240	13509
SRR036708__contig_5462	NorthernBobwhite_ScaffoldedDeNovo_contig_240	16717
SRR036708__contig_13625	NorthernBobwhite_ScaffoldedDeNovo_contig_240	46105
SRR036708__contig_6078	NorthernBobwhite_ScaffoldedDeNovo_contig_240	58212
SRR036708__contig_3483	NorthernBobwhite_ScaffoldedDeNovo_contig_241	21123
SRR036708__contig_10470	NorthernBobwhite_ScaffoldedDeNovo_contig_241	21685
SRR036708__contig_19864	NorthernBobwhite_ScaffoldedDeNovo_contig_241	26030
SRR036708__contig_12012	NorthernBobwhite_ScaffoldedDeNovo_contig_241	31563
SRR036708__contig_18542	NorthernBobwhite_ScaffoldedDeNovo_contig_242	10927
SRR036708__contig_14065	NorthernBobwhite_ScaffoldedDeNovo_contig_242	14700
SRR036708__contig_14923	NorthernBobwhite_ScaffoldedDeNovo_contig_242	53571
SRR036708__contig_15734	NorthernBobwhite_ScaffoldedDeNovo_contig_246	1893
SRR036708__contig_13644	NorthernBobwhite_ScaffoldedDeNovo_contig_248	39617
SRR036708__contig_16612	NorthernBobwhite_ScaffoldedDeNovo_contig_248	42627
SRR036708__contig_16231	NorthernBobwhite_ScaffoldedDeNovo_contig_248	58036
SRR036708__contig_16880	NorthernBobwhite_ScaffoldedDeNovo_contig_248	134411
SRR036708__contig_19797	NorthernBobwhite_ScaffoldedDeNovo_contig_248	142225
SRR036708__contig_16268	NorthernBobwhite_ScaffoldedDeNovo_contig_252	4666
SRR036708__contig_4319	NorthernBobwhite_ScaffoldedDeNovo_contig_252	5256
SRR036708__contig_16774	NorthernBobwhite_ScaffoldedDeNovo_contig_252	41420
SRR036708__contig_21311	NorthernBobwhite_ScaffoldedDeNovo_contig_252	61815
SRR036708__contig_13617	NorthernBobwhite_ScaffoldedDeNovo_contig_257	19602
SRR036708__contig_16950	NorthernBobwhite_ScaffoldedDeNovo_contig_257	20449
SRR036708__contig_19319	NorthernBobwhite_ScaffoldedDeNovo_contig_262	26324
SRR036708__contig_3640	NorthernBobwhite_ScaffoldedDeNovo_contig_266	1853
SRR036708__contig_10716	NorthernBobwhite_ScaffoldedDeNovo_contig_266	3238
SRR036708__contig_10715	NorthernBobwhite_ScaffoldedDeNovo_contig_266	3381
SRR036708__contig_19086	NorthernBobwhite_ScaffoldedDeNovo_contig_266	6014
SRR036708__contig_5335	NorthernBobwhite_ScaffoldedDeNovo_contig_266	7494
SRR036708__contig_18845	NorthernBobwhite_ScaffoldedDeNovo_contig_266	12676
SRR036708__contig_9501	NorthernBobwhite_ScaffoldedDeNovo_contig_267	27825
SRR036708__contig_7416	NorthernBobwhite_ScaffoldedDeNovo_contig_267	31485
SRR036708__contig_10551	NorthernBobwhite_ScaffoldedDeNovo_contig_270	11672
SRR036708__contig_3439	NorthernBobwhite_ScaffoldedDeNovo_contig_270	60839
SRR036708__contig_14735	NorthernBobwhite_ScaffoldedDeNovo_contig_272	67730
SRR036708__contig_16522	NorthernBobwhite_ScaffoldedDeNovo_contig_273	35749
SRR036708__contig_2389	NorthernBobwhite_ScaffoldedDeNovo_contig_273	36798
SRR036708__contig_18907	NorthernBobwhite_ScaffoldedDeNovo_contig_273	38360
SRR036708__contig_15583	NorthernBobwhite_ScaffoldedDeNovo_contig_273	38860
SRR036708__contig_9815	NorthernBobwhite_ScaffoldedDeNovo_contig_275	23615
SRR036708__contig_15634	NorthernBobwhite_ScaffoldedDeNovo_contig_275	33568
SRR036708__contig_13154	NorthernBobwhite_ScaffoldedDeNovo_contig_278	213
SRR036708__contig_12008	NorthernBobwhite_ScaffoldedDeNovo_contig_278	1430
SRR036708__contig_6181	NorthernBobwhite_ScaffoldedDeNovo_contig_278	1976
SRR036708__contig_12043	NorthernBobwhite_ScaffoldedDeNovo_contig_279	31754
SRR036708__contig_20124	NorthernBobwhite_ScaffoldedDeNovo_contig_279	32791
SRR036708__contig_5147	NorthernBobwhite_ScaffoldedDeNovo_contig_279	36475
SRR036708__contig_827	NorthernBobwhite_ScaffoldedDeNovo_contig_283	17067
SRR036708__contig_4262	NorthernBobwhite_ScaffoldedDeNovo_contig_284	93143
SRR036708__contig_9557	NorthernBobwhite_ScaffoldedDeNovo_contig_284	115705
SRR036708__contig_7335	NorthernBobwhite_ScaffoldedDeNovo_contig_288	2724
SRR036708__contig_7652	NorthernBobwhite_ScaffoldedDeNovo_contig_288	24058
SRR036708__contig_17313	NorthernBobwhite_ScaffoldedDeNovo_contig_288	25600
SRR036708__contig_4412	NorthernBobwhite_ScaffoldedDeNovo_contig_288	28148
SRR036708__contig_17201	NorthernBobwhite_ScaffoldedDeNovo_contig_288	34847
SRR036708__contig_2842	NorthernBobwhite_ScaffoldedDeNovo_contig_288	35095
SRR036708__contig_17070	NorthernBobwhite_ScaffoldedDeNovo_contig_288	39551
SRR036708__contig_9464	NorthernBobwhite_ScaffoldedDeNovo_contig_290	37266
SRR036708__contig_17460	NorthernBobwhite_ScaffoldedDeNovo_contig_290	38275
SRR036708__contig_6734	NorthernBobwhite_ScaffoldedDeNovo_contig_301	8740
SRR036708__contig_7041	NorthernBobwhite_ScaffoldedDeNovo_contig_301	18977
SRR036708__contig_14233	NorthernBobwhite_ScaffoldedDeNovo_contig_301	21913
SRR036708__contig_10353	NorthernBobwhite_ScaffoldedDeNovo_contig_301	23372
SRR036708__contig_4061	NorthernBobwhite_ScaffoldedDeNovo_contig_301	37488
SRR036708__contig_2854	NorthernBobwhite_ScaffoldedDeNovo_contig_301	38661
SRR036708__contig_20196	NorthernBobwhite_ScaffoldedDeNovo_contig_301	41890
SRR036708__contig_14088	NorthernBobwhite_ScaffoldedDeNovo_contig_301	69169
SRR036708__contig_9547	NorthernBobwhite_ScaffoldedDeNovo_contig_301	70047
SRR036708__contig_9406	NorthernBobwhite_ScaffoldedDeNovo_contig_301	70514
SRR036708__contig_20612	NorthernBobwhite_ScaffoldedDeNovo_contig_301	79400
SRR036708__contig_20152	NorthernBobwhite_ScaffoldedDeNovo_contig_301	81088
SRR036708__contig_9731	NorthernBobwhite_ScaffoldedDeNovo_contig_301	83105
SRR036708__contig_2300	NorthernBobwhite_ScaffoldedDeNovo_contig_301	96134
SRR036708__contig_4911	NorthernBobwhite_ScaffoldedDeNovo_contig_304	308
SRR036708__contig_11079	NorthernBobwhite_ScaffoldedDeNovo_contig_305	19158
SRR036708__contig_17377	NorthernBobwhite_ScaffoldedDeNovo_contig_308	12560
SRR036708__contig_10702	NorthernBobwhite_ScaffoldedDeNovo_contig_308	13902
SRR036708__contig_14514	NorthernBobwhite_ScaffoldedDeNovo_contig_308	15289
SRR036708__contig_12255	NorthernBobwhite_ScaffoldedDeNovo_contig_311	34162
SRR036708__contig_5559	NorthernBobwhite_ScaffoldedDeNovo_contig_311	35122
SRR036708__contig_17725	NorthernBobwhite_ScaffoldedDeNovo_contig_312	55529
SRR036708__contig_17832	NorthernBobwhite_ScaffoldedDeNovo_contig_312	65053
SRR036708__contig_8090	NorthernBobwhite_ScaffoldedDeNovo_contig_314	24501
SRR036708__contig_11553	NorthernBobwhite_ScaffoldedDeNovo_contig_314	25077
SRR036708__contig_2929	NorthernBobwhite_ScaffoldedDeNovo_contig_314	27809
SRR036708__contig_7839	NorthernBobwhite_ScaffoldedDeNovo_contig_314	29881
SRR036708__contig_8603	NorthernBobwhite_ScaffoldedDeNovo_contig_317	415
SRR036708__contig_7533	NorthernBobwhite_ScaffoldedDeNovo_contig_317	2620
SRR036708__contig_19952	NorthernBobwhite_ScaffoldedDeNovo_contig_317	6310
SRR036708__contig_7124	NorthernBobwhite_ScaffoldedDeNovo_contig_317	8212
SRR036708__contig_3610	NorthernBobwhite_ScaffoldedDeNovo_contig_319	40726
SRR036708__contig_2393	NorthernBobwhite_ScaffoldedDeNovo_contig_319	41020
SRR036708__contig_15643	NorthernBobwhite_ScaffoldedDeNovo_contig_319	43070
SRR036708__contig_14008	NorthernBobwhite_ScaffoldedDeNovo_contig_323	17357
SRR036708__contig_18972	NorthernBobwhite_ScaffoldedDeNovo_contig_329	139048
SRR036708__contig_20759	NorthernBobwhite_ScaffoldedDeNovo_contig_329	145695
SRR036708__contig_11087	NorthernBobwhite_ScaffoldedDeNovo_contig_332	19246
SRR036708__contig_10044	NorthernBobwhite_ScaffoldedDeNovo_contig_332	28744
SRR036708__contig_19863	NorthernBobwhite_ScaffoldedDeNovo_contig_332	32920
SRR036708__contig_15718	NorthernBobwhite_ScaffoldedDeNovo_contig_332	33340
SRR036708__contig_9625	NorthernBobwhite_ScaffoldedDeNovo_contig_332	64269
SRR036708__contig_18186	NorthernBobwhite_ScaffoldedDeNovo_contig_332	130099
SRR036708__contig_1612	NorthernBobwhite_ScaffoldedDeNovo_contig_332	140849
SRR036708__contig_20522	NorthernBobwhite_ScaffoldedDeNovo_contig_332	144744
SRR036708__contig_1094	NorthernBobwhite_ScaffoldedDeNovo_contig_332	174740
SRR036708__contig_12899	NorthernBobwhite_ScaffoldedDeNovo_contig_332	186209
SRR036708__contig_11419	NorthernBobwhite_ScaffoldedDeNovo_contig_332	252118
SRR036708__contig_19462	NorthernBobwhite_ScaffoldedDeNovo_contig_332	264198
SRR036708__contig_4663	NorthernBobwhite_ScaffoldedDeNovo_contig_336	2387
SRR036708__contig_9897	NorthernBobwhite_ScaffoldedDeNovo_contig_336	5156
SRR036708__contig_17666	NorthernBobwhite_ScaffoldedDeNovo_contig_336	5467
SRR036708__contig_19489	NorthernBobwhite_ScaffoldedDeNovo_contig_336	6407
SRR036708__contig_1256	NorthernBobwhite_ScaffoldedDeNovo_contig_336	6962
SRR036708__contig_17576	NorthernBobwhite_ScaffoldedDeNovo_contig_336	42304
SRR036708__contig_16529	NorthernBobwhite_ScaffoldedDeNovo_contig_336	57963
SRR036708__contig_7062	NorthernBobwhite_ScaffoldedDeNovo_contig_337	21902
SRR036708__contig_14856	NorthernBobwhite_ScaffoldedDeNovo_contig_337	23563
SRR036708__contig_5277	NorthernBobwhite_ScaffoldedDeNovo_contig_337	56023
SRR036708__contig_5295	NorthernBobwhite_ScaffoldedDeNovo_contig_337	58824
SRR036708__contig_3491	NorthernBobwhite_ScaffoldedDeNovo_contig_337	84361
SRR036708__contig_19777	NorthernBobwhite_ScaffoldedDeNovo_contig_337	94033
SRR036708__contig_4212	NorthernBobwhite_ScaffoldedDeNovo_contig_342	14118
SRR036708__contig_5597	NorthernBobwhite_ScaffoldedDeNovo_contig_342	20270
SRR036708__contig_14093	NorthernBobwhite_ScaffoldedDeNovo_contig_344	3249
SRR036708__contig_10179	NorthernBobwhite_ScaffoldedDeNovo_contig_344	19886
SRR036708__contig_18536	NorthernBobwhite_ScaffoldedDeNovo_contig_344	29927
SRR036708__contig_11269	NorthernBobwhite_ScaffoldedDeNovo_contig_345	17676
SRR036708__contig_20477	NorthernBobwhite_ScaffoldedDeNovo_contig_345	18290
SRR036708__contig_9410	NorthernBobwhite_ScaffoldedDeNovo_contig_345	19666
SRR036708__contig_18837	NorthernBobwhite_ScaffoldedDeNovo_contig_345	34770
SRR036708__contig_5329	NorthernBobwhite_ScaffoldedDeNovo_contig_345	120971
SRR036708__contig_11009	NorthernBobwhite_ScaffoldedDeNovo_contig_345	122685
SRR036708__contig_3941	NorthernBobwhite_ScaffoldedDeNovo_contig_349	4112
SRR036708__contig_12909	NorthernBobwhite_ScaffoldedDeNovo_contig_349	35698
SRR036708__contig_12908	NorthernBobwhite_ScaffoldedDeNovo_contig_349	35948
SRR036708__contig_7886	NorthernBobwhite_ScaffoldedDeNovo_contig_349	36805
SRR036708__contig_15511	NorthernBobwhite_ScaffoldedDeNovo_contig_349	102389
SRR036708__contig_18156	NorthernBobwhite_ScaffoldedDeNovo_contig_351	10332
SRR036708__contig_19821	NorthernBobwhite_ScaffoldedDeNovo_contig_351	13693
SRR036708__contig_20761	NorthernBobwhite_ScaffoldedDeNovo_contig_351	17343
SRR036708__contig_20281	NorthernBobwhite_ScaffoldedDeNovo_contig_351	18755
SRR036708__contig_11773	NorthernBobwhite_ScaffoldedDeNovo_contig_351	19762
SRR036708__contig_8601	NorthernBobwhite_ScaffoldedDeNovo_contig_351	20678
SRR036708__contig_7810	NorthernBobwhite_ScaffoldedDeNovo_contig_351	35872
SRR036708__contig_9477	NorthernBobwhite_ScaffoldedDeNovo_contig_351	36448
SRR036708__contig_1417	NorthernBobwhite_ScaffoldedDeNovo_contig_351	41723
SRR036708__contig_610	NorthernBobwhite_ScaffoldedDeNovo_contig_351	51745
SRR036708__contig_2103	NorthernBobwhite_ScaffoldedDeNovo_contig_351	55703
SRR036708__contig_345	NorthernBobwhite_ScaffoldedDeNovo_contig_353	8280
SRR036708__contig_12266	NorthernBobwhite_ScaffoldedDeNovo_contig_353	10313
SRR036708__contig_17129	NorthernBobwhite_ScaffoldedDeNovo_contig_353	13153
SRR036708__contig_8746	NorthernBobwhite_ScaffoldedDeNovo_contig_356	205985
SRR036708__contig_8747	NorthernBobwhite_ScaffoldedDeNovo_contig_356	206399
SRR036708__contig_6853	NorthernBobwhite_ScaffoldedDeNovo_contig_359	23409
SRR036708__contig_13966	NorthernBobwhite_ScaffoldedDeNovo_contig_359	24952
SRR036708__contig_19695	NorthernBobwhite_ScaffoldedDeNovo_contig_359	42421
SRR036708__contig_695	NorthernBobwhite_ScaffoldedDeNovo_contig_362	8097
SRR036708__contig_6687	NorthernBobwhite_ScaffoldedDeNovo_contig_362	14559
SRR036708__contig_4083	NorthernBobwhite_ScaffoldedDeNovo_contig_362	15313
SRR036708__contig_1886	NorthernBobwhite_ScaffoldedDeNovo_contig_362	15884
SRR036708__contig_9255	NorthernBobwhite_ScaffoldedDeNovo_contig_362	61340
SRR036708__contig_14864	NorthernBobwhite_ScaffoldedDeNovo_contig_362	170493
SRR036708__contig_20895	NorthernBobwhite_ScaffoldedDeNovo_contig_362	308712
SRR036708__contig_1046	NorthernBobwhite_ScaffoldedDeNovo_contig_362	324348
SRR036708__contig_15540	NorthernBobwhite_ScaffoldedDeNovo_contig_363	58553
SRR036708__contig_15896	NorthernBobwhite_ScaffoldedDeNovo_contig_363	59071
SRR036708__contig_20117	NorthernBobwhite_ScaffoldedDeNovo_contig_363	91386
SRR036708__contig_14799	NorthernBobwhite_ScaffoldedDeNovo_contig_363	92568
SRR036708__contig_4771	NorthernBobwhite_ScaffoldedDeNovo_contig_363	93176
SRR036708__contig_18700	NorthernBobwhite_ScaffoldedDeNovo_contig_363	99643
SRR036708__contig_13785	NorthernBobwhite_ScaffoldedDeNovo_contig_363	173630
SRR036708__contig_5506	NorthernBobwhite_ScaffoldedDeNovo_contig_363	174715
SRR036708__contig_14017	NorthernBobwhite_ScaffoldedDeNovo_contig_363	193017
SRR036708__contig_18653	NorthernBobwhite_ScaffoldedDeNovo_contig_363	282685
SRR036708__contig_9818	NorthernBobwhite_ScaffoldedDeNovo_contig_365	19706
SRR036708__contig_17555	NorthernBobwhite_ScaffoldedDeNovo_contig_365	21621
SRR036708__contig_21212	NorthernBobwhite_ScaffoldedDeNovo_contig_365	23650
SRR036708__contig_8790	NorthernBobwhite_ScaffoldedDeNovo_contig_372	81243
SRR036708__contig_7015	NorthernBobwhite_ScaffoldedDeNovo_contig_372	142145
SRR036708__contig_11670	NorthernBobwhite_ScaffoldedDeNovo_contig_372	142976
SRR036708__contig_635	NorthernBobwhite_ScaffoldedDeNovo_contig_372	144006
SRR036708__contig_10034	NorthernBobwhite_ScaffoldedDeNovo_contig_374	28348
SRR036708__contig_13690	NorthernBobwhite_ScaffoldedDeNovo_contig_374	69776
SRR036708__contig_908	NorthernBobwhite_ScaffoldedDeNovo_contig_374	70204
SRR036708__contig_21358	NorthernBobwhite_ScaffoldedDeNovo_contig_374	71429
SRR036708__contig_14704	NorthernBobwhite_ScaffoldedDeNovo_contig_374	87627
SRR036708__contig_7026	NorthernBobwhite_ScaffoldedDeNovo_contig_374	88665
SRR036708__contig_18973	NorthernBobwhite_ScaffoldedDeNovo_contig_374	91206
SRR036708__contig_8192	NorthernBobwhite_ScaffoldedDeNovo_contig_374	91606
SRR036708__contig_20149	NorthernBobwhite_ScaffoldedDeNovo_contig_375	86492
SRR036708__contig_10413	NorthernBobwhite_ScaffoldedDeNovo_contig_376	33134
SRR036708__contig_9781	NorthernBobwhite_ScaffoldedDeNovo_contig_377	27319
SRR036708__contig_12836	NorthernBobwhite_ScaffoldedDeNovo_contig_378	3942
SRR036708__contig_13361	NorthernBobwhite_ScaffoldedDeNovo_contig_378	8066
SRR036708__contig_10367	NorthernBobwhite_ScaffoldedDeNovo_contig_378	12001
SRR036708__contig_6768	NorthernBobwhite_ScaffoldedDeNovo_contig_378	12278
SRR036708__contig_11402	NorthernBobwhite_ScaffoldedDeNovo_contig_378	19919
SRR036708__contig_3020	NorthernBobwhite_ScaffoldedDeNovo_contig_378	23312
SRR036708__contig_3511	NorthernBobwhite_ScaffoldedDeNovo_contig_379	95166
SRR036708__contig_13608	NorthernBobwhite_ScaffoldedDeNovo_contig_382	26380
SRR036708__contig_10383	NorthernBobwhite_ScaffoldedDeNovo_contig_382	27372
SRR036708__contig_13878	NorthernBobwhite_ScaffoldedDeNovo_contig_382	63940
SRR036708__contig_8588	NorthernBobwhite_ScaffoldedDeNovo_contig_382	69690
SRR036708__contig_3190	NorthernBobwhite_ScaffoldedDeNovo_contig_383	20198
SRR036708__contig_10091	NorthernBobwhite_ScaffoldedDeNovo_contig_384	85944
SRR036708__contig_18977	NorthernBobwhite_ScaffoldedDeNovo_contig_387	31947
SRR036708__contig_16351	NorthernBobwhite_ScaffoldedDeNovo_contig_387	56063
SRR036708__contig_8108	NorthernBobwhite_ScaffoldedDeNovo_contig_387	72797
SRR036708__contig_5989	NorthernBobwhite_ScaffoldedDeNovo_contig_387	74398
SRR036708__contig_154	NorthernBobwhite_ScaffoldedDeNovo_contig_387	76735
SRR036708__contig_2629	NorthernBobwhite_ScaffoldedDeNovo_contig_387	89582
SRR036708__contig_19287	NorthernBobwhite_ScaffoldedDeNovo_contig_388	131709
SRR036708__contig_1802	NorthernBobwhite_ScaffoldedDeNovo_contig_389	6253
SRR036708__contig_11704	NorthernBobwhite_ScaffoldedDeNovo_contig_390	219
SRR036708__contig_12195	NorthernBobwhite_ScaffoldedDeNovo_contig_390	82187
SRR036708__contig_6020	NorthernBobwhite_ScaffoldedDeNovo_contig_391	3541
SRR036708__contig_17007	NorthernBobwhite_ScaffoldedDeNovo_contig_391	7547
SRR036708__contig_17760	NorthernBobwhite_ScaffoldedDeNovo_contig_391	8699
SRR036708__contig_5143	NorthernBobwhite_ScaffoldedDeNovo_contig_391	29594
SRR036708__contig_8178	NorthernBobwhite_ScaffoldedDeNovo_contig_391	36075
SRR036708__contig_10254	NorthernBobwhite_ScaffoldedDeNovo_contig_391	38207
SRR036708__contig_17736	NorthernBobwhite_ScaffoldedDeNovo_contig_391	105757
SRR036708__contig_5825	NorthernBobwhite_ScaffoldedDeNovo_contig_391	106662
SRR036708__contig_3405	NorthernBobwhite_ScaffoldedDeNovo_contig_391	109228
SRR036708__contig_10602	NorthernBobwhite_ScaffoldedDeNovo_contig_391	115632
SRR036708__contig_11392	NorthernBobwhite_ScaffoldedDeNovo_contig_398	274702
SRR036708__contig_15186	NorthernBobwhite_ScaffoldedDeNovo_contig_398	275192
SRR036708__contig_20210	NorthernBobwhite_ScaffoldedDeNovo_contig_399	97577
SRR036708__contig_15988	NorthernBobwhite_ScaffoldedDeNovo_contig_402	15451
SRR036708__contig_14554	NorthernBobwhite_ScaffoldedDeNovo_contig_402	15724
SRR036708__contig_7458	NorthernBobwhite_ScaffoldedDeNovo_contig_402	16095
SRR036708__contig_6999	NorthernBobwhite_ScaffoldedDeNovo_contig_402	17939
SRR036708__contig_20620	NorthernBobwhite_ScaffoldedDeNovo_contig_402	20193
SRR036708__contig_17434	NorthernBobwhite_ScaffoldedDeNovo_contig_406	304091
SRR036708__contig_12604	NorthernBobwhite_ScaffoldedDeNovo_contig_406	366317
SRR036708__contig_372	NorthernBobwhite_ScaffoldedDeNovo_contig_406	371213
SRR036708__contig_18222	NorthernBobwhite_ScaffoldedDeNovo_contig_406	375267
SRR036708__contig_20235	NorthernBobwhite_ScaffoldedDeNovo_contig_406	376428
SRR036708__contig_8221	NorthernBobwhite_ScaffoldedDeNovo_contig_406	384307
SRR036708__contig_15209	NorthernBobwhite_ScaffoldedDeNovo_contig_406	385142
SRR036708__contig_13006	NorthernBobwhite_ScaffoldedDeNovo_contig_406	385962
SRR036708__contig_11794	NorthernBobwhite_ScaffoldedDeNovo_contig_406	406841
SRR036708__contig_4142	NorthernBobwhite_ScaffoldedDeNovo_contig_406	412002
SRR036708__contig_17548	NorthernBobwhite_ScaffoldedDeNovo_contig_406	413384
SRR036708__contig_19544	NorthernBobwhite_ScaffoldedDeNovo_contig_406	421170
SRR036708__contig_18875	NorthernBobwhite_ScaffoldedDeNovo_contig_409	9299
SRR036708__contig_9185	NorthernBobwhite_ScaffoldedDeNovo_contig_409	10177
SRR036708__contig_13857	NorthernBobwhite_ScaffoldedDeNovo_contig_410	15736
SRR036708__contig_9934	NorthernBobwhite_ScaffoldedDeNovo_contig_410	84986
SRR036708__contig_460	NorthernBobwhite_ScaffoldedDeNovo_contig_410	94386
SRR036708__contig_14290	NorthernBobwhite_ScaffoldedDeNovo_contig_410	105371
SRR036708__contig_20488	NorthernBobwhite_ScaffoldedDeNovo_contig_410	114932
SRR036708__contig_11653	NorthernBobwhite_ScaffoldedDeNovo_contig_410	117088
SRR036708__contig_16080	NorthernBobwhite_ScaffoldedDeNovo_contig_410	152963
SRR036708__contig_15791	NorthernBobwhite_ScaffoldedDeNovo_contig_417	17478
SRR036708__contig_6193	NorthernBobwhite_ScaffoldedDeNovo_contig_418	21241
SRR036708__contig_4318	NorthernBobwhite_ScaffoldedDeNovo_contig_418	27465
SRR036708__contig_11630	NorthernBobwhite_ScaffoldedDeNovo_contig_418	58483
SRR036708__contig_5847	NorthernBobwhite_ScaffoldedDeNovo_contig_418	82172
SRR036708__contig_3985	NorthernBobwhite_ScaffoldedDeNovo_contig_419	45790
SRR036708__contig_3334	NorthernBobwhite_ScaffoldedDeNovo_contig_419	47136
SRR036708__contig_19432	NorthernBobwhite_ScaffoldedDeNovo_contig_419	63804
SRR036708__contig_19718	NorthernBobwhite_ScaffoldedDeNovo_contig_419	72737
SRR036708__contig_8072	NorthernBobwhite_ScaffoldedDeNovo_contig_419	105724
SRR036708__contig_19789	NorthernBobwhite_ScaffoldedDeNovo_contig_419	120468
SRR036708__contig_10375	NorthernBobwhite_ScaffoldedDeNovo_contig_419	121092
SRR036708__contig_8139	NorthernBobwhite_ScaffoldedDeNovo_contig_419	126630
SRR036708__contig_3572	NorthernBobwhite_ScaffoldedDeNovo_contig_419	146711
SRR036708__contig_11431	NorthernBobwhite_ScaffoldedDeNovo_contig_419	156279
SRR036708__contig_13953	NorthernBobwhite_ScaffoldedDeNovo_contig_419	180083
SRR036708__contig_14632	NorthernBobwhite_ScaffoldedDeNovo_contig_419	185082
SRR036708__contig_7385	NorthernBobwhite_ScaffoldedDeNovo_contig_419	283759
SRR036708__contig_12459	NorthernBobwhite_ScaffoldedDeNovo_contig_419	292712
SRR036708__contig_12974	NorthernBobwhite_ScaffoldedDeNovo_contig_422	197571
SRR036708__contig_9700	NorthernBobwhite_ScaffoldedDeNovo_contig_426	8013
SRR036708__contig_5111	NorthernBobwhite_ScaffoldedDeNovo_contig_427	11066
SRR036708__contig_8633	NorthernBobwhite_ScaffoldedDeNovo_contig_428	13626
SRR036708__contig_7075	NorthernBobwhite_ScaffoldedDeNovo_contig_430	729
SRR036708__contig_11349	NorthernBobwhite_ScaffoldedDeNovo_contig_430	26484
SRR036708__contig_1156	NorthernBobwhite_ScaffoldedDeNovo_contig_431	19496
SRR036708__contig_6398	NorthernBobwhite_ScaffoldedDeNovo_contig_431	21187
SRR036708__contig_4	NorthernBobwhite_ScaffoldedDeNovo_contig_431	21735
SRR036708__contig_7711	NorthernBobwhite_ScaffoldedDeNovo_contig_431	45857
SRR036708__contig_4917	NorthernBobwhite_ScaffoldedDeNovo_contig_434	36631
SRR036708__contig_8779	NorthernBobwhite_ScaffoldedDeNovo_contig_434	37807
SRR036708__contig_1714	NorthernBobwhite_ScaffoldedDeNovo_contig_434	38651
SRR036708__contig_14970	NorthernBobwhite_ScaffoldedDeNovo_contig_434	41467
SRR036708__contig_5588	NorthernBobwhite_ScaffoldedDeNovo_contig_435	1664
SRR036708__contig_10030	NorthernBobwhite_ScaffoldedDeNovo_contig_435	3452
SRR036708__contig_8113	NorthernBobwhite_ScaffoldedDeNovo_contig_436	26727
SRR036708__contig_17477	NorthernBobwhite_ScaffoldedDeNovo_contig_436	37055
SRR036708__contig_7407	NorthernBobwhite_ScaffoldedDeNovo_contig_438	35165
SRR036708__contig_15918	NorthernBobwhite_ScaffoldedDeNovo_contig_439	2894
SRR036708__contig_5946	NorthernBobwhite_ScaffoldedDeNovo_contig_439	84877
SRR036708__contig_3602	NorthernBobwhite_ScaffoldedDeNovo_contig_439	190009
SRR036708__contig_2245	NorthernBobwhite_ScaffoldedDeNovo_contig_439	191119
SRR036708__contig_11485	NorthernBobwhite_ScaffoldedDeNovo_contig_439	191754
SRR036708__contig_5309	NorthernBobwhite_ScaffoldedDeNovo_contig_439	223691
SRR036708__contig_20921	NorthernBobwhite_ScaffoldedDeNovo_contig_439	226404
SRR036708__contig_15632	NorthernBobwhite_ScaffoldedDeNovo_contig_439	242105
SRR036708__contig_17195	NorthernBobwhite_ScaffoldedDeNovo_contig_439	253275
SRR036708__contig_7584	NorthernBobwhite_ScaffoldedDeNovo_contig_446	2665
SRR036708__contig_16122	NorthernBobwhite_ScaffoldedDeNovo_contig_450	34447
SRR036708__contig_7799	NorthernBobwhite_ScaffoldedDeNovo_contig_451	6238
SRR036708__contig_12400	NorthernBobwhite_ScaffoldedDeNovo_contig_451	25934
SRR036708__contig_8911	NorthernBobwhite_ScaffoldedDeNovo_contig_454	33016
SRR036708__contig_8087	NorthernBobwhite_ScaffoldedDeNovo_contig_454	44846
SRR036708__contig_13620	NorthernBobwhite_ScaffoldedDeNovo_contig_456	49739
SRR036708__contig_16146	NorthernBobwhite_ScaffoldedDeNovo_contig_456	50288
SRR036708__contig_16685	NorthernBobwhite_ScaffoldedDeNovo_contig_456	69504
SRR036708__contig_18767	NorthernBobwhite_ScaffoldedDeNovo_contig_461	11307
SRR036708__contig_21083	NorthernBobwhite_ScaffoldedDeNovo_contig_461	59217
SRR036708__contig_18573	NorthernBobwhite_ScaffoldedDeNovo_contig_461	59966
SRR036708__contig_2895	NorthernBobwhite_ScaffoldedDeNovo_contig_461	61464
SRR036708__contig_5069	NorthernBobwhite_ScaffoldedDeNovo_contig_462	365
SRR036708__contig_15471	NorthernBobwhite_ScaffoldedDeNovo_contig_462	43170
SRR036708__contig_5765	NorthernBobwhite_ScaffoldedDeNovo_contig_462	64969
SRR036708__contig_16877	NorthernBobwhite_ScaffoldedDeNovo_contig_463	3100
SRR036708__contig_9947	NorthernBobwhite_ScaffoldedDeNovo_contig_463	3433
SRR036708__contig_1896	NorthernBobwhite_ScaffoldedDeNovo_contig_463	3708
SRR036708__contig_8048	NorthernBobwhite_ScaffoldedDeNovo_contig_463	6866
SRR036708__contig_9128	NorthernBobwhite_ScaffoldedDeNovo_contig_467	9153
SRR036708__contig_246	NorthernBobwhite_ScaffoldedDeNovo_contig_467	14877
SRR036708__contig_5397	NorthernBobwhite_ScaffoldedDeNovo_contig_467	15864
SRR036708__contig_13383	NorthernBobwhite_ScaffoldedDeNovo_contig_467	41140
SRR036708__contig_12703	NorthernBobwhite_ScaffoldedDeNovo_contig_467	64041
SRR036708__contig_9956	NorthernBobwhite_ScaffoldedDeNovo_contig_467	69306
SRR036708__contig_9516	NorthernBobwhite_ScaffoldedDeNovo_contig_468	9382
SRR036708__contig_9417	NorthernBobwhite_ScaffoldedDeNovo_contig_468	34179
SRR036708__contig_3094	NorthernBobwhite_ScaffoldedDeNovo_contig_470	40360
SRR036708__contig_3095	NorthernBobwhite_ScaffoldedDeNovo_contig_470	41030
SRR036708__contig_4443	NorthernBobwhite_ScaffoldedDeNovo_contig_470	41539
SRR036708__contig_1198	NorthernBobwhite_ScaffoldedDeNovo_contig_470	84796
SRR036708__contig_1197	NorthernBobwhite_ScaffoldedDeNovo_contig_470	84802
SRR036708__contig_7171	NorthernBobwhite_ScaffoldedDeNovo_contig_470	87152
SRR036708__contig_7934	NorthernBobwhite_ScaffoldedDeNovo_contig_473	11989
SRR036708__contig_7191	NorthernBobwhite_ScaffoldedDeNovo_contig_478	4222
SRR036708__contig_8607	NorthernBobwhite_ScaffoldedDeNovo_contig_478	13462
SRR036708__contig_13750	NorthernBobwhite_ScaffoldedDeNovo_contig_478	21421
SRR036708__contig_16984	NorthernBobwhite_ScaffoldedDeNovo_contig_478	21932
SRR036708__contig_1395	NorthernBobwhite_ScaffoldedDeNovo_contig_478	22417
SRR036708__contig_18010	NorthernBobwhite_ScaffoldedDeNovo_contig_478	23125
SRR036708__contig_13227	NorthernBobwhite_ScaffoldedDeNovo_contig_478	73995
SRR036708__contig_18411	NorthernBobwhite_ScaffoldedDeNovo_contig_478	74819
SRR036708__contig_10675	NorthernBobwhite_ScaffoldedDeNovo_contig_478	76535
SRR036708__contig_16213	NorthernBobwhite_ScaffoldedDeNovo_contig_481	11274
SRR036708__contig_12506	NorthernBobwhite_ScaffoldedDeNovo_contig_481	20246
SRR036708__contig_4590	NorthernBobwhite_ScaffoldedDeNovo_contig_482	864
SRR036708__contig_831	NorthernBobwhite_ScaffoldedDeNovo_contig_483	1
SRR036708__contig_4035	NorthernBobwhite_ScaffoldedDeNovo_contig_483	3165
SRR036708__contig_19357	NorthernBobwhite_ScaffoldedDeNovo_contig_483	7717
SRR036708__contig_8625	NorthernBobwhite_ScaffoldedDeNovo_contig_483	8610
SRR036708__contig_233	NorthernBobwhite_ScaffoldedDeNovo_contig_483	14163
SRR036708__contig_6754	NorthernBobwhite_ScaffoldedDeNovo_contig_483	67578
SRR036708__contig_18263	NorthernBobwhite_ScaffoldedDeNovo_contig_483	71637
SRR036708__contig_8333	NorthernBobwhite_ScaffoldedDeNovo_contig_485	19504
SRR036708__contig_11744	NorthernBobwhite_ScaffoldedDeNovo_contig_485	36936
SRR036708__contig_5993	NorthernBobwhite_ScaffoldedDeNovo_contig_485	37441
SRR036708__contig_4772	NorthernBobwhite_ScaffoldedDeNovo_contig_486	8194
SRR036708__contig_13337	NorthernBobwhite_ScaffoldedDeNovo_contig_486	9076
SRR036708__contig_1248	NorthernBobwhite_ScaffoldedDeNovo_contig_486	9358
SRR036708__contig_17639	NorthernBobwhite_ScaffoldedDeNovo_contig_486	17415
SRR036708__contig_4386	NorthernBobwhite_ScaffoldedDeNovo_contig_486	25244
SRR036708__contig_17542	NorthernBobwhite_ScaffoldedDeNovo_contig_486	26028
SRR036708__contig_7007	NorthernBobwhite_ScaffoldedDeNovo_contig_486	45436
SRR036708__contig_20165	NorthernBobwhite_ScaffoldedDeNovo_contig_486	46010
SRR036708__contig_14035	NorthernBobwhite_ScaffoldedDeNovo_contig_490	10556
SRR036708__contig_10129	NorthernBobwhite_ScaffoldedDeNovo_contig_490	10912
SRR036708__contig_6175	NorthernBobwhite_ScaffoldedDeNovo_contig_490	11467
SRR036708__contig_9676	NorthernBobwhite_ScaffoldedDeNovo_contig_490	14585
SRR036708__contig_7874	NorthernBobwhite_ScaffoldedDeNovo_contig_490	15544
SRR036708__contig_13611	NorthernBobwhite_ScaffoldedDeNovo_contig_490	38925
SRR036708__contig_7165	NorthernBobwhite_ScaffoldedDeNovo_contig_490	43751
SRR036708__contig_20430	NorthernBobwhite_ScaffoldedDeNovo_contig_490	46218
SRR036708__contig_16019	NorthernBobwhite_ScaffoldedDeNovo_contig_490	47075
SRR036708__contig_17948	NorthernBobwhite_ScaffoldedDeNovo_contig_490	50513
SRR036708__contig_6408	NorthernBobwhite_ScaffoldedDeNovo_contig_490	51033
SRR036708__contig_14057	NorthernBobwhite_ScaffoldedDeNovo_contig_490	51621
SRR036708__contig_21186	NorthernBobwhite_ScaffoldedDeNovo_contig_490	73004
SRR036708__contig_9498	NorthernBobwhite_ScaffoldedDeNovo_contig_490	74022
SRR036708__contig_10922	NorthernBobwhite_ScaffoldedDeNovo_contig_490	74709
SRR036708__contig_7409	NorthernBobwhite_ScaffoldedDeNovo_contig_490	88246
SRR036708__contig_6909	NorthernBobwhite_ScaffoldedDeNovo_contig_490	88665
SRR036708__contig_3856	NorthernBobwhite_ScaffoldedDeNovo_contig_495	53988
SRR036708__contig_14463	NorthernBobwhite_ScaffoldedDeNovo_contig_501	89394
SRR036708__contig_13410	NorthernBobwhite_ScaffoldedDeNovo_contig_506	11580
SRR036708__contig_11904	NorthernBobwhite_ScaffoldedDeNovo_contig_506	25178
SRR036708__contig_9116	NorthernBobwhite_ScaffoldedDeNovo_contig_510	10708
SRR036708__contig_12123	NorthernBobwhite_ScaffoldedDeNovo_contig_510	20993
SRR036708__contig_10147	NorthernBobwhite_ScaffoldedDeNovo_contig_510	24039
SRR036708__contig_15481	NorthernBobwhite_ScaffoldedDeNovo_contig_510	24412
SRR036708__contig_6876	NorthernBobwhite_ScaffoldedDeNovo_contig_510	41926
SRR036708__contig_4507	NorthernBobwhite_ScaffoldedDeNovo_contig_510	47044
SRR036708__contig_2508	NorthernBobwhite_ScaffoldedDeNovo_contig_510	48469
SRR036708__contig_15237	NorthernBobwhite_ScaffoldedDeNovo_contig_510	49323
SRR036708__contig_6519	NorthernBobwhite_ScaffoldedDeNovo_contig_510	50064
SRR036708__contig_16304	NorthernBobwhite_ScaffoldedDeNovo_contig_510	51305
SRR036708__contig_5306	NorthernBobwhite_ScaffoldedDeNovo_contig_517	47428
SRR036708__contig_19540	NorthernBobwhite_ScaffoldedDeNovo_contig_518	35294
SRR036708__contig_20607	NorthernBobwhite_ScaffoldedDeNovo_contig_518	35889
SRR036708__contig_13392	NorthernBobwhite_ScaffoldedDeNovo_contig_520	43839
SRR036708__contig_12922	NorthernBobwhite_ScaffoldedDeNovo_contig_520	51023
SRR036708__contig_9820	NorthernBobwhite_ScaffoldedDeNovo_contig_520	51947
SRR036708__contig_7404	NorthernBobwhite_ScaffoldedDeNovo_contig_527	167
SRR036708__contig_14835	NorthernBobwhite_ScaffoldedDeNovo_contig_528	28401
SRR036708__contig_6267	NorthernBobwhite_ScaffoldedDeNovo_contig_528	29814
SRR036708__contig_15114	NorthernBobwhite_ScaffoldedDeNovo_contig_528	30285
SRR036708__contig_10670	NorthernBobwhite_ScaffoldedDeNovo_contig_528	92508
SRR036708__contig_10591	NorthernBobwhite_ScaffoldedDeNovo_contig_529	41143
SRR036708__contig_14133	NorthernBobwhite_ScaffoldedDeNovo_contig_529	43240
SRR036708__contig_16247	NorthernBobwhite_ScaffoldedDeNovo_contig_529	57138
SRR036708__contig_198	NorthernBobwhite_ScaffoldedDeNovo_contig_529	58205
SRR036708__contig_4414	NorthernBobwhite_ScaffoldedDeNovo_contig_529	58862
SRR036708__contig_7166	NorthernBobwhite_ScaffoldedDeNovo_contig_529	65170
SRR036708__contig_14990	NorthernBobwhite_ScaffoldedDeNovo_contig_532	5898
SRR036708__contig_7293	NorthernBobwhite_ScaffoldedDeNovo_contig_532	6743
SRR036708__contig_19938	NorthernBobwhite_ScaffoldedDeNovo_contig_532	14596
SRR036708__contig_8660	NorthernBobwhite_ScaffoldedDeNovo_contig_532	17071
SRR036708__contig_15286	NorthernBobwhite_ScaffoldedDeNovo_contig_532	18795
SRR036708__contig_20020	NorthernBobwhite_ScaffoldedDeNovo_contig_532	31389
SRR036708__contig_13212	NorthernBobwhite_ScaffoldedDeNovo_contig_532	35496
SRR036708__contig_13162	NorthernBobwhite_ScaffoldedDeNovo_contig_532	68852
SRR036708__contig_15329	NorthernBobwhite_ScaffoldedDeNovo_contig_532	72722
SRR036708__contig_16499	NorthernBobwhite_ScaffoldedDeNovo_contig_532	73104
SRR036708__contig_11241	NorthernBobwhite_ScaffoldedDeNovo_contig_532	73336
SRR036708__contig_6056	NorthernBobwhite_ScaffoldedDeNovo_contig_535	22400
SRR036708__contig_10989	NorthernBobwhite_ScaffoldedDeNovo_contig_535	37190
SRR036708__contig_8011	NorthernBobwhite_ScaffoldedDeNovo_contig_535	40828
SRR036708__contig_5346	NorthernBobwhite_ScaffoldedDeNovo_contig_535	46177
SRR036708__contig_16885	NorthernBobwhite_ScaffoldedDeNovo_contig_535	54090
SRR036708__contig_19690	NorthernBobwhite_ScaffoldedDeNovo_contig_535	123799
SRR036708__contig_8713	NorthernBobwhite_ScaffoldedDeNovo_contig_536	45721
SRR036708__contig_16974	NorthernBobwhite_ScaffoldedDeNovo_contig_536	62358
SRR036708__contig_10765	NorthernBobwhite_ScaffoldedDeNovo_contig_536	63549
SRR036708__contig_17924	NorthernBobwhite_ScaffoldedDeNovo_contig_536	65651
SRR036708__contig_19979	NorthernBobwhite_ScaffoldedDeNovo_contig_536	65672
SRR036708__contig_12852	NorthernBobwhite_ScaffoldedDeNovo_contig_536	77214
SRR036708__contig_7824	NorthernBobwhite_ScaffoldedDeNovo_contig_539	28164
SRR036708__contig_18980	NorthernBobwhite_ScaffoldedDeNovo_contig_541	13070
SRR036708__contig_11531	NorthernBobwhite_ScaffoldedDeNovo_contig_542	832
SRR036708__contig_15010	NorthernBobwhite_ScaffoldedDeNovo_contig_542	3565
SRR036708__contig_11592	NorthernBobwhite_ScaffoldedDeNovo_contig_542	3570
SRR036708__contig_8347	NorthernBobwhite_ScaffoldedDeNovo_contig_542	11497
SRR036708__contig_20195	NorthernBobwhite_ScaffoldedDeNovo_contig_542	16039
SRR036708__contig_7988	NorthernBobwhite_ScaffoldedDeNovo_contig_544	35577
SRR036708__contig_12819	NorthernBobwhite_ScaffoldedDeNovo_contig_546	4955
SRR036708__contig_13635	NorthernBobwhite_ScaffoldedDeNovo_contig_546	6918
SRR036708__contig_13886	NorthernBobwhite_ScaffoldedDeNovo_contig_546	7379
SRR036708__contig_1742	NorthernBobwhite_ScaffoldedDeNovo_contig_546	7679
SRR036708__contig_21274	NorthernBobwhite_ScaffoldedDeNovo_contig_547	41923
SRR036708__contig_8486	NorthernBobwhite_ScaffoldedDeNovo_contig_548	10216
SRR036708__contig_14007	NorthernBobwhite_ScaffoldedDeNovo_contig_548	10597
SRR036708__contig_12769	NorthernBobwhite_ScaffoldedDeNovo_contig_548	11011
SRR036708__contig_5530	NorthernBobwhite_ScaffoldedDeNovo_contig_548	11646
SRR036708__contig_20008	NorthernBobwhite_ScaffoldedDeNovo_contig_548	17704
SRR036708__contig_10821	NorthernBobwhite_ScaffoldedDeNovo_contig_549	216
SRR036708__contig_13752	NorthernBobwhite_ScaffoldedDeNovo_contig_549	3637
SRR036708__contig_19903	NorthernBobwhite_ScaffoldedDeNovo_contig_549	17715
SRR036708__contig_15025	NorthernBobwhite_ScaffoldedDeNovo_contig_549	18058
SRR036708__contig_8675	NorthernBobwhite_ScaffoldedDeNovo_contig_549	20143
SRR036708__contig_15074	NorthernBobwhite_ScaffoldedDeNovo_contig_549	21765
SRR036708__contig_18444	NorthernBobwhite_ScaffoldedDeNovo_contig_549	22656
SRR036708__contig_12078	NorthernBobwhite_ScaffoldedDeNovo_contig_552	2932
SRR036708__contig_6304	NorthernBobwhite_ScaffoldedDeNovo_contig_552	33485
SRR036708__contig_11331	NorthernBobwhite_ScaffoldedDeNovo_contig_552	80494
SRR036708__contig_5752	NorthernBobwhite_ScaffoldedDeNovo_contig_553	19959
SRR036708__contig_7239	NorthernBobwhite_ScaffoldedDeNovo_contig_558	2614
SRR036708__contig_13004	NorthernBobwhite_ScaffoldedDeNovo_contig_558	3077
SRR036708__contig_7942	NorthernBobwhite_ScaffoldedDeNovo_contig_558	3319
SRR036708__contig_3312	NorthernBobwhite_ScaffoldedDeNovo_contig_558	3996
SRR036708__contig_12447	NorthernBobwhite_ScaffoldedDeNovo_contig_558	5023
SRR036708__contig_18644	NorthernBobwhite_ScaffoldedDeNovo_contig_558	7903
SRR036708__contig_3515	NorthernBobwhite_ScaffoldedDeNovo_contig_558	10360
SRR036708__contig_13446	NorthernBobwhite_ScaffoldedDeNovo_contig_564	10117
SRR036708__contig_19731	NorthernBobwhite_ScaffoldedDeNovo_contig_564	36171
SRR036708__contig_1081	NorthernBobwhite_ScaffoldedDeNovo_contig_565	75
SRR036708__contig_16603	NorthernBobwhite_ScaffoldedDeNovo_contig_565	5913
SRR036708__contig_8488	NorthernBobwhite_ScaffoldedDeNovo_contig_565	6425
SRR036708__contig_1967	NorthernBobwhite_ScaffoldedDeNovo_contig_565	8706
SRR036708__contig_6541	NorthernBobwhite_ScaffoldedDeNovo_contig_568	2315
SRR036708__contig_16073	NorthernBobwhite_ScaffoldedDeNovo_contig_570	44143
SRR036708__contig_7918	NorthernBobwhite_ScaffoldedDeNovo_contig_570	50794
SRR036708__contig_16920	NorthernBobwhite_ScaffoldedDeNovo_contig_570	60756
SRR036708__contig_13926	NorthernBobwhite_ScaffoldedDeNovo_contig_570	70475
SRR036708__contig_1724	NorthernBobwhite_ScaffoldedDeNovo_contig_570	82539
SRR036708__contig_2233	NorthernBobwhite_ScaffoldedDeNovo_contig_572	21796
SRR036708__contig_13565	NorthernBobwhite_ScaffoldedDeNovo_contig_576	1450
SRR036708__contig_13887	NorthernBobwhite_ScaffoldedDeNovo_contig_577	39831
SRR036708__contig_10020	NorthernBobwhite_ScaffoldedDeNovo_contig_577	53729
SRR036708__contig_14322	NorthernBobwhite_ScaffoldedDeNovo_contig_581	890
SRR036708__contig_21014	NorthernBobwhite_ScaffoldedDeNovo_contig_582	1
SRR036708__contig_14733	NorthernBobwhite_ScaffoldedDeNovo_contig_584	218745
SRR036708__contig_1128	NorthernBobwhite_ScaffoldedDeNovo_contig_584	223043
SRR036708__contig_17896	NorthernBobwhite_ScaffoldedDeNovo_contig_584	227396
SRR036708__contig_8092	NorthernBobwhite_ScaffoldedDeNovo_contig_584	228281
SRR036708__contig_4549	NorthernBobwhite_ScaffoldedDeNovo_contig_584	238762
SRR036708__contig_17728	NorthernBobwhite_ScaffoldedDeNovo_contig_584	239967
SRR036708__contig_14715	NorthernBobwhite_ScaffoldedDeNovo_contig_584	240563
SRR036708__contig_6604	NorthernBobwhite_ScaffoldedDeNovo_contig_584	240874
SRR036708__contig_2591	NorthernBobwhite_ScaffoldedDeNovo_contig_584	241092
SRR036708__contig_7172	NorthernBobwhite_ScaffoldedDeNovo_contig_585	16268
SRR036708__contig_5140	NorthernBobwhite_ScaffoldedDeNovo_contig_585	21135
SRR036708__contig_16385	NorthernBobwhite_ScaffoldedDeNovo_contig_585	26962
SRR036708__contig_19315	NorthernBobwhite_ScaffoldedDeNovo_contig_585	48307
SRR036708__contig_16985	NorthernBobwhite_ScaffoldedDeNovo_contig_585	48609
SRR036708__contig_6161	NorthernBobwhite_ScaffoldedDeNovo_contig_585	139780
SRR036708__contig_14981	NorthernBobwhite_ScaffoldedDeNovo_contig_585	232632
SRR036708__contig_462	NorthernBobwhite_ScaffoldedDeNovo_contig_586	44243
SRR036708__contig_7485	NorthernBobwhite_ScaffoldedDeNovo_contig_586	44588
SRR036708__contig_2959	NorthernBobwhite_ScaffoldedDeNovo_contig_586	100127
SRR036708__contig_7979	NorthernBobwhite_ScaffoldedDeNovo_contig_586	100625
SRR036708__contig_18226	NorthernBobwhite_ScaffoldedDeNovo_contig_586	122300
SRR036708__contig_16149	NorthernBobwhite_ScaffoldedDeNovo_contig_586	131725
SRR036708__contig_12505	NorthernBobwhite_ScaffoldedDeNovo_contig_587	29462
SRR036708__contig_10046	NorthernBobwhite_ScaffoldedDeNovo_contig_587	42840
SRR036708__contig_7	NorthernBobwhite_ScaffoldedDeNovo_contig_587	44555
SRR036708__contig_5737	NorthernBobwhite_ScaffoldedDeNovo_contig_588	8345
SRR036708__contig_12721	NorthernBobwhite_ScaffoldedDeNovo_contig_589	1382
SRR036708__contig_12968	NorthernBobwhite_ScaffoldedDeNovo_contig_589	1828
SRR036708__contig_7955	NorthernBobwhite_ScaffoldedDeNovo_contig_589	2308
SRR036708__contig_20704	NorthernBobwhite_ScaffoldedDeNovo_contig_589	2615
SRR036708__contig_19144	NorthernBobwhite_ScaffoldedDeNovo_contig_589	32105
SRR036708__contig_4811	NorthernBobwhite_ScaffoldedDeNovo_contig_589	33584
SRR036708__contig_4810	NorthernBobwhite_ScaffoldedDeNovo_contig_589	33721
SRR036708__contig_5412	NorthernBobwhite_ScaffoldedDeNovo_contig_589	34826
SRR036708__contig_9278	NorthernBobwhite_ScaffoldedDeNovo_contig_589	45891
SRR036708__contig_20993	NorthernBobwhite_ScaffoldedDeNovo_contig_589	81632
SRR036708__contig_8377	NorthernBobwhite_ScaffoldedDeNovo_contig_589	82069
SRR036708__contig_12197	NorthernBobwhite_ScaffoldedDeNovo_contig_589	82621
SRR036708__contig_13904	NorthernBobwhite_ScaffoldedDeNovo_contig_589	103434
SRR036708__contig_10388	NorthernBobwhite_ScaffoldedDeNovo_contig_589	108935
SRR036708__contig_9596	NorthernBobwhite_ScaffoldedDeNovo_contig_589	119944
SRR036708__contig_6552	NorthernBobwhite_ScaffoldedDeNovo_contig_592	16144
SRR036708__contig_14822	NorthernBobwhite_ScaffoldedDeNovo_contig_592	62607
SRR036708__contig_10416	NorthernBobwhite_ScaffoldedDeNovo_contig_594	68091
SRR036708__contig_9679	NorthernBobwhite_ScaffoldedDeNovo_contig_595	26942
SRR036708__contig_3295	NorthernBobwhite_ScaffoldedDeNovo_contig_595	28818
SRR036708__contig_4224	NorthernBobwhite_ScaffoldedDeNovo_contig_595	29839
SRR036708__contig_5224	NorthernBobwhite_ScaffoldedDeNovo_contig_595	32824
SRR036708__contig_938	NorthernBobwhite_ScaffoldedDeNovo_contig_595	33906
SRR036708__contig_10617	NorthernBobwhite_ScaffoldedDeNovo_contig_595	34656
SRR036708__contig_828	NorthernBobwhite_ScaffoldedDeNovo_contig_595	45283
SRR036708__contig_17168	NorthernBobwhite_ScaffoldedDeNovo_contig_597	5537
SRR036708__contig_6480	NorthernBobwhite_ScaffoldedDeNovo_contig_597	31756
SRR036708__contig_20491	NorthernBobwhite_ScaffoldedDeNovo_contig_597	33399
SRR036708__contig_4495	NorthernBobwhite_ScaffoldedDeNovo_contig_597	76081
SRR036708__contig_14580	NorthernBobwhite_ScaffoldedDeNovo_contig_600	26117
SRR036708__contig_12632	NorthernBobwhite_ScaffoldedDeNovo_contig_600	32799
SRR036708__contig_16997	NorthernBobwhite_ScaffoldedDeNovo_contig_601	24406
SRR036708__contig_20823	NorthernBobwhite_ScaffoldedDeNovo_contig_601	24983
SRR036708__contig_7562	NorthernBobwhite_ScaffoldedDeNovo_contig_601	69654
SRR036708__contig_10767	NorthernBobwhite_ScaffoldedDeNovo_contig_602	6115
SRR036708__contig_14730	NorthernBobwhite_ScaffoldedDeNovo_contig_603	14005
SRR036708__contig_8066	NorthernBobwhite_ScaffoldedDeNovo_contig_606	10067
SRR036708__contig_10583	NorthernBobwhite_ScaffoldedDeNovo_contig_606	12820
SRR036708__contig_7706	NorthernBobwhite_ScaffoldedDeNovo_contig_608	38077
SRR036708__contig_11949	NorthernBobwhite_ScaffoldedDeNovo_contig_608	38966
SRR036708__contig_10810	NorthernBobwhite_ScaffoldedDeNovo_contig_608	145889
SRR036708__contig_5445	NorthernBobwhite_ScaffoldedDeNovo_contig_608	146317
SRR036708__contig_5636	NorthernBobwhite_ScaffoldedDeNovo_contig_609	39788
SRR036708__contig_17957	NorthernBobwhite_ScaffoldedDeNovo_contig_609	42008
SRR036708__contig_17362	NorthernBobwhite_ScaffoldedDeNovo_contig_609	42560
SRR036708__contig_9402	NorthernBobwhite_ScaffoldedDeNovo_contig_613	60843
SRR036708__contig_13432	NorthernBobwhite_ScaffoldedDeNovo_contig_613	68968
SRR036708__contig_10567	NorthernBobwhite_ScaffoldedDeNovo_contig_617	19899
SRR036708__contig_14857	NorthernBobwhite_ScaffoldedDeNovo_contig_617	28320
SRR036708__contig_1452	NorthernBobwhite_ScaffoldedDeNovo_contig_617	30645
SRR036708__contig_10577	NorthernBobwhite_ScaffoldedDeNovo_contig_619	10897
SRR036708__contig_17321	NorthernBobwhite_ScaffoldedDeNovo_contig_619	38396
SRR036708__contig_7897	NorthernBobwhite_ScaffoldedDeNovo_contig_619	47313
SRR036708__contig_6076	NorthernBobwhite_ScaffoldedDeNovo_contig_619	49056
SRR036708__contig_1634	NorthernBobwhite_ScaffoldedDeNovo_contig_619	50360
SRR036708__contig_17977	NorthernBobwhite_ScaffoldedDeNovo_contig_619	55304
SRR036708__contig_8467	NorthernBobwhite_ScaffoldedDeNovo_contig_619	57553
SRR036708__contig_3974	NorthernBobwhite_ScaffoldedDeNovo_contig_619	95521
SRR036708__contig_672	NorthernBobwhite_ScaffoldedDeNovo_contig_619	98317
SRR036708__contig_1007	NorthernBobwhite_ScaffoldedDeNovo_contig_619	100621
SRR036708__contig_1966	NorthernBobwhite_ScaffoldedDeNovo_contig_619	108657
SRR036708__contig_6888	NorthernBobwhite_ScaffoldedDeNovo_contig_619	121089
SRR036708__contig_15163	NorthernBobwhite_ScaffoldedDeNovo_contig_619	162766
SRR036708__contig_1970	NorthernBobwhite_ScaffoldedDeNovo_contig_619	169184
SRR036708__contig_8974	NorthernBobwhite_ScaffoldedDeNovo_contig_619	172249
SRR036708__contig_5579	NorthernBobwhite_ScaffoldedDeNovo_contig_619	172808
SRR036708__contig_17784	NorthernBobwhite_ScaffoldedDeNovo_contig_619	175299
SRR036708__contig_18053	NorthernBobwhite_ScaffoldedDeNovo_contig_619	178941
SRR036708__contig_8639	NorthernBobwhite_ScaffoldedDeNovo_contig_624	96643
SRR036708__contig_13263	NorthernBobwhite_ScaffoldedDeNovo_contig_624	98002
SRR036708__contig_1207	NorthernBobwhite_ScaffoldedDeNovo_contig_624	102147
SRR036708__contig_9757	NorthernBobwhite_ScaffoldedDeNovo_contig_624	103439
SRR036708__contig_7182	NorthernBobwhite_ScaffoldedDeNovo_contig_624	109992
SRR036708__contig_9221	NorthernBobwhite_ScaffoldedDeNovo_contig_624	127179
SRR036708__contig_21230	NorthernBobwhite_ScaffoldedDeNovo_contig_624	150613
SRR036708__contig_3133	NorthernBobwhite_ScaffoldedDeNovo_contig_628	18304
SRR036708__contig_17686	NorthernBobwhite_ScaffoldedDeNovo_contig_631	9197
SRR036708__contig_15751	NorthernBobwhite_ScaffoldedDeNovo_contig_631	20769
SRR036708__contig_17049	NorthernBobwhite_ScaffoldedDeNovo_contig_631	35911
SRR036708__contig_17061	NorthernBobwhite_ScaffoldedDeNovo_contig_631	37140
SRR036708__contig_11258	NorthernBobwhite_ScaffoldedDeNovo_contig_631	54855
SRR036708__contig_13234	NorthernBobwhite_ScaffoldedDeNovo_contig_633	12174
SRR036708__contig_14304	NorthernBobwhite_ScaffoldedDeNovo_contig_635	15069
SRR036708__contig_4119	NorthernBobwhite_ScaffoldedDeNovo_contig_643	1612
SRR036708__contig_14564	NorthernBobwhite_ScaffoldedDeNovo_contig_643	1971
SRR036708__contig_7771	NorthernBobwhite_ScaffoldedDeNovo_contig_643	3062
SRR036708__contig_1475	NorthernBobwhite_ScaffoldedDeNovo_contig_643	4101
SRR036708__contig_10878	NorthernBobwhite_ScaffoldedDeNovo_contig_643	5439
SRR036708__contig_4120	NorthernBobwhite_ScaffoldedDeNovo_contig_644	246
SRR036708__contig_7100	NorthernBobwhite_ScaffoldedDeNovo_contig_644	4445
SRR036708__contig_17499	NorthernBobwhite_ScaffoldedDeNovo_contig_644	11882
SRR036708__contig_8313	NorthernBobwhite_ScaffoldedDeNovo_contig_644	29155
SRR036708__contig_932	NorthernBobwhite_ScaffoldedDeNovo_contig_646	26928
SRR036708__contig_3900	NorthernBobwhite_ScaffoldedDeNovo_contig_646	41296
SRR036708__contig_7424	NorthernBobwhite_ScaffoldedDeNovo_contig_648	16155
SRR036708__contig_16413	NorthernBobwhite_ScaffoldedDeNovo_contig_648	16482
SRR036708__contig_13842	NorthernBobwhite_ScaffoldedDeNovo_contig_649	23945
SRR036708__contig_20711	NorthernBobwhite_ScaffoldedDeNovo_contig_650	43549
SRR036708__contig_7443	NorthernBobwhite_ScaffoldedDeNovo_contig_650	50072
SRR036708__contig_1496	NorthernBobwhite_ScaffoldedDeNovo_contig_650	54689
SRR036708__contig_21344	NorthernBobwhite_ScaffoldedDeNovo_contig_650	68897
SRR036708__contig_17058	NorthernBobwhite_ScaffoldedDeNovo_contig_650	69968
SRR036708__contig_21196	NorthernBobwhite_ScaffoldedDeNovo_contig_650	82516
SRR036708__contig_7280	NorthernBobwhite_ScaffoldedDeNovo_contig_654	6026
SRR036708__contig_10084	NorthernBobwhite_ScaffoldedDeNovo_contig_654	6861
SRR036708__contig_15973	NorthernBobwhite_ScaffoldedDeNovo_contig_657	95168
SRR036708__contig_9868	NorthernBobwhite_ScaffoldedDeNovo_contig_657	95702
SRR036708__contig_7116	NorthernBobwhite_ScaffoldedDeNovo_contig_658	2865
SRR036708__contig_3743	NorthernBobwhite_ScaffoldedDeNovo_contig_658	15816
SRR036708__contig_9579	NorthernBobwhite_ScaffoldedDeNovo_contig_658	16808
SRR036708__contig_9794	NorthernBobwhite_ScaffoldedDeNovo_contig_658	18328
SRR036708__contig_5053	NorthernBobwhite_ScaffoldedDeNovo_contig_658	22964
SRR036708__contig_15106	NorthernBobwhite_ScaffoldedDeNovo_contig_661	11670
SRR036708__contig_17356	NorthernBobwhite_ScaffoldedDeNovo_contig_661	16377
SRR036708__contig_18497	NorthernBobwhite_ScaffoldedDeNovo_contig_661	47132
SRR036708__contig_4038	NorthernBobwhite_ScaffoldedDeNovo_contig_661	67170
SRR036708__contig_14121	NorthernBobwhite_ScaffoldedDeNovo_contig_661	67700
SRR036708__contig_6166	NorthernBobwhite_ScaffoldedDeNovo_contig_661	70225
SRR036708__contig_18467	NorthernBobwhite_ScaffoldedDeNovo_contig_661	70867
SRR036708__contig_2484	NorthernBobwhite_ScaffoldedDeNovo_contig_673	494
SRR036708__contig_10839	NorthernBobwhite_ScaffoldedDeNovo_contig_673	12317
SRR036708__contig_8540	NorthernBobwhite_ScaffoldedDeNovo_contig_673	21218
SRR036708__contig_9294	NorthernBobwhite_ScaffoldedDeNovo_contig_673	24260
SRR036708__contig_4861	NorthernBobwhite_ScaffoldedDeNovo_contig_674	30381
SRR036708__contig_8840	NorthernBobwhite_ScaffoldedDeNovo_contig_674	31153
SRR036708__contig_17353	NorthernBobwhite_ScaffoldedDeNovo_contig_674	35283
SRR036708__contig_5307	NorthernBobwhite_ScaffoldedDeNovo_contig_677	37026
SRR036708__contig_12684	NorthernBobwhite_ScaffoldedDeNovo_contig_677	66933
SRR036708__contig_1859	NorthernBobwhite_ScaffoldedDeNovo_contig_680	15005
SRR036708__contig_111	NorthernBobwhite_ScaffoldedDeNovo_contig_684	2617
SRR036708__contig_14989	NorthernBobwhite_ScaffoldedDeNovo_contig_684	14199
SRR036708__contig_2914	NorthernBobwhite_ScaffoldedDeNovo_contig_685	10150
SRR036708__contig_1206	NorthernBobwhite_ScaffoldedDeNovo_contig_685	169462
SRR036708__contig_13099	NorthernBobwhite_ScaffoldedDeNovo_contig_685	185962
SRR036708__contig_2818	NorthernBobwhite_ScaffoldedDeNovo_contig_687	706
SRR036708__contig_12249	NorthernBobwhite_ScaffoldedDeNovo_contig_692	52504
SRR036708__contig_11874	NorthernBobwhite_ScaffoldedDeNovo_contig_692	52994
SRR036708__contig_8568	NorthernBobwhite_ScaffoldedDeNovo_contig_692	53778
SRR036708__contig_12709	NorthernBobwhite_ScaffoldedDeNovo_contig_692	67198
SRR036708__contig_3496	NorthernBobwhite_ScaffoldedDeNovo_contig_692	67988
SRR036708__contig_13247	NorthernBobwhite_ScaffoldedDeNovo_contig_698	40443
SRR036708__contig_14838	NorthernBobwhite_ScaffoldedDeNovo_contig_698	40836
SRR036708__contig_12898	NorthernBobwhite_ScaffoldedDeNovo_contig_698	41200
SRR036708__contig_18004	NorthernBobwhite_ScaffoldedDeNovo_contig_711	44223
SRR036708__contig_5894	NorthernBobwhite_ScaffoldedDeNovo_contig_711	49081
SRR036708__contig_7158	NorthernBobwhite_ScaffoldedDeNovo_contig_711	50250
SRR036708__contig_19163	NorthernBobwhite_ScaffoldedDeNovo_contig_711	50833
SRR036708__contig_11525	NorthernBobwhite_ScaffoldedDeNovo_contig_711	86987
SRR036708__contig_17681	NorthernBobwhite_ScaffoldedDeNovo_contig_712	4563
SRR036708__contig_8768	NorthernBobwhite_ScaffoldedDeNovo_contig_712	27872
SRR036708__contig_10458	NorthernBobwhite_ScaffoldedDeNovo_contig_712	39286
SRR036708__contig_7541	NorthernBobwhite_ScaffoldedDeNovo_contig_716	1301
SRR036708__contig_15979	NorthernBobwhite_ScaffoldedDeNovo_contig_717	12133
SRR036708__contig_3279	NorthernBobwhite_ScaffoldedDeNovo_contig_718	1865
SRR036708__contig_15814	NorthernBobwhite_ScaffoldedDeNovo_contig_718	3279
SRR036708__contig_14213	NorthernBobwhite_ScaffoldedDeNovo_contig_719	76683
SRR036708__contig_15834	NorthernBobwhite_ScaffoldedDeNovo_contig_719	77249
SRR036708__contig_11933	NorthernBobwhite_ScaffoldedDeNovo_contig_719	77528
SRR036708__contig_2782	NorthernBobwhite_ScaffoldedDeNovo_contig_719	78777
SRR036708__contig_20097	NorthernBobwhite_ScaffoldedDeNovo_contig_719	81088
SRR036708__contig_19631	NorthernBobwhite_ScaffoldedDeNovo_contig_719	81704
SRR036708__contig_5513	NorthernBobwhite_ScaffoldedDeNovo_contig_719	82295
SRR036708__contig_3425	NorthernBobwhite_ScaffoldedDeNovo_contig_719	86146
SRR036708__contig_6386	NorthernBobwhite_ScaffoldedDeNovo_contig_719	87166
SRR036708__contig_3261	NorthernBobwhite_ScaffoldedDeNovo_contig_719	97824
SRR036708__contig_13930	NorthernBobwhite_ScaffoldedDeNovo_contig_719	101108
SRR036708__contig_8206	NorthernBobwhite_ScaffoldedDeNovo_contig_719	102026
SRR036708__contig_8205	NorthernBobwhite_ScaffoldedDeNovo_contig_719	102058
SRR036708__contig_3960	NorthernBobwhite_ScaffoldedDeNovo_contig_719	103498
SRR036708__contig_4949	NorthernBobwhite_ScaffoldedDeNovo_contig_719	104926
SRR036708__contig_14576	NorthernBobwhite_ScaffoldedDeNovo_contig_719	133522
SRR036708__contig_6235	NorthernBobwhite_ScaffoldedDeNovo_contig_719	140844
SRR036708__contig_19945	NorthernBobwhite_ScaffoldedDeNovo_contig_719	147041
SRR036708__contig_20106	NorthernBobwhite_ScaffoldedDeNovo_contig_719	147786
SRR036708__contig_15487	NorthernBobwhite_ScaffoldedDeNovo_contig_719	151355
SRR036708__contig_9555	NorthernBobwhite_ScaffoldedDeNovo_contig_719	175477
SRR036708__contig_4360	NorthernBobwhite_ScaffoldedDeNovo_contig_720	1
SRR036708__contig_2248	NorthernBobwhite_ScaffoldedDeNovo_contig_722	19317
SRR036708__contig_12443	NorthernBobwhite_ScaffoldedDeNovo_contig_722	22020
SRR036708__contig_17556	NorthernBobwhite_ScaffoldedDeNovo_contig_722	22645
SRR036708__contig_2421	NorthernBobwhite_ScaffoldedDeNovo_contig_722	31139
SRR036708__contig_2422	NorthernBobwhite_ScaffoldedDeNovo_contig_722	31637
SRR036708__contig_350	NorthernBobwhite_ScaffoldedDeNovo_contig_722	31919
SRR036708__contig_18400	NorthernBobwhite_ScaffoldedDeNovo_contig_722	33898
SRR036708__contig_16795	NorthernBobwhite_ScaffoldedDeNovo_contig_722	39011
SRR036708__contig_21048	NorthernBobwhite_ScaffoldedDeNovo_contig_722	61597
SRR036708__contig_10205	NorthernBobwhite_ScaffoldedDeNovo_contig_726	9851
SRR036708__contig_16096	NorthernBobwhite_ScaffoldedDeNovo_contig_726	16166
SRR036708__contig_15112	NorthernBobwhite_ScaffoldedDeNovo_contig_726	16944
SRR036708__contig_10830	NorthernBobwhite_ScaffoldedDeNovo_contig_726	41932
SRR036708__contig_18298	NorthernBobwhite_ScaffoldedDeNovo_contig_726	42184
SRR036708__contig_987	NorthernBobwhite_ScaffoldedDeNovo_contig_726	42908
SRR036708__contig_14407	NorthernBobwhite_ScaffoldedDeNovo_contig_726	44698
SRR036708__contig_14316	NorthernBobwhite_ScaffoldedDeNovo_contig_728	35653
SRR036708__contig_14266	NorthernBobwhite_ScaffoldedDeNovo_contig_728	37057
SRR036708__contig_20683	NorthernBobwhite_ScaffoldedDeNovo_contig_728	44626
SRR036708__contig_12734	NorthernBobwhite_ScaffoldedDeNovo_contig_728	46128
SRR036708__contig_21078	NorthernBobwhite_ScaffoldedDeNovo_contig_733	14409
SRR036708__contig_14773	NorthernBobwhite_ScaffoldedDeNovo_contig_734	2554
SRR036708__contig_2392	NorthernBobwhite_ScaffoldedDeNovo_contig_734	3226
SRR036708__contig_11776	NorthernBobwhite_ScaffoldedDeNovo_contig_734	43437
SRR036708__contig_9236	NorthernBobwhite_ScaffoldedDeNovo_contig_734	43965
SRR036708__contig_7672	NorthernBobwhite_ScaffoldedDeNovo_contig_734	45679
SRR036708__contig_13391	NorthernBobwhite_ScaffoldedDeNovo_contig_738	8659
SRR036708__contig_2243	NorthernBobwhite_ScaffoldedDeNovo_contig_738	13306
SRR036708__contig_10959	NorthernBobwhite_ScaffoldedDeNovo_contig_738	38577
SRR036708__contig_12737	NorthernBobwhite_ScaffoldedDeNovo_contig_738	44543
SRR036708__contig_18500	NorthernBobwhite_ScaffoldedDeNovo_contig_738	48987
SRR036708__contig_10390	NorthernBobwhite_ScaffoldedDeNovo_contig_738	52544
SRR036708__contig_3988	NorthernBobwhite_ScaffoldedDeNovo_contig_738	54115
SRR036708__contig_1920	NorthernBobwhite_ScaffoldedDeNovo_contig_738	68180
SRR036708__contig_10619	NorthernBobwhite_ScaffoldedDeNovo_contig_738	70667
SRR036708__contig_3771	NorthernBobwhite_ScaffoldedDeNovo_contig_741	32128
SRR036708__contig_11012	NorthernBobwhite_ScaffoldedDeNovo_contig_741	41326
SRR036708__contig_8166	NorthernBobwhite_ScaffoldedDeNovo_contig_741	41909
SRR036708__contig_17488	NorthernBobwhite_ScaffoldedDeNovo_contig_741	96093
SRR036708__contig_8893	NorthernBobwhite_ScaffoldedDeNovo_contig_742	19457
SRR036708__contig_5328	NorthernBobwhite_ScaffoldedDeNovo_contig_744	53158
SRR036708__contig_16981	NorthernBobwhite_ScaffoldedDeNovo_contig_744	54851
SRR036708__contig_9817	NorthernBobwhite_ScaffoldedDeNovo_contig_744	55351
SRR036708__contig_15892	NorthernBobwhite_ScaffoldedDeNovo_contig_744	55638
SRR036708__contig_5544	NorthernBobwhite_ScaffoldedDeNovo_contig_747	23230
SRR036708__contig_19973	NorthernBobwhite_ScaffoldedDeNovo_contig_747	44249
SRR036708__contig_18141	NorthernBobwhite_ScaffoldedDeNovo_contig_747	66108
SRR036708__contig_166	NorthernBobwhite_ScaffoldedDeNovo_contig_747	68058
SRR036708__contig_16672	NorthernBobwhite_ScaffoldedDeNovo_contig_747	69373
SRR036708__contig_12635	NorthernBobwhite_ScaffoldedDeNovo_contig_747	69750
SRR036708__contig_14746	NorthernBobwhite_ScaffoldedDeNovo_contig_747	70928
SRR036708__contig_9033	NorthernBobwhite_ScaffoldedDeNovo_contig_747	91896
SRR036708__contig_3982	NorthernBobwhite_ScaffoldedDeNovo_contig_747	96417
SRR036708__contig_17400	NorthernBobwhite_ScaffoldedDeNovo_contig_748	71284
SRR036708__contig_1224	NorthernBobwhite_ScaffoldedDeNovo_contig_749	37506
SRR036708__contig_14844	NorthernBobwhite_ScaffoldedDeNovo_contig_749	43028
SRR036708__contig_689	NorthernBobwhite_ScaffoldedDeNovo_contig_749	46427
SRR036708__contig_3243	NorthernBobwhite_ScaffoldedDeNovo_contig_753	12142
SRR036708__contig_8636	NorthernBobwhite_ScaffoldedDeNovo_contig_753	13154
SRR036708__contig_11302	NorthernBobwhite_ScaffoldedDeNovo_contig_757	89022
SRR036708__contig_5012	NorthernBobwhite_ScaffoldedDeNovo_contig_761	8445
SRR036708__contig_15066	NorthernBobwhite_ScaffoldedDeNovo_contig_767	193364
SRR036708__contig_12216	NorthernBobwhite_ScaffoldedDeNovo_contig_767	193858
SRR036708__contig_14690	NorthernBobwhite_ScaffoldedDeNovo_contig_767	194846
SRR036708__contig_19912	NorthernBobwhite_ScaffoldedDeNovo_contig_768	25592
SRR036708__contig_4805	NorthernBobwhite_ScaffoldedDeNovo_contig_769	3173
SRR036708__contig_21147	NorthernBobwhite_ScaffoldedDeNovo_contig_774	44816
SRR036708__contig_13265	NorthernBobwhite_ScaffoldedDeNovo_contig_774	46874
SRR036708__contig_10125	NorthernBobwhite_ScaffoldedDeNovo_contig_774	53439
SRR036708__contig_2320	NorthernBobwhite_ScaffoldedDeNovo_contig_774	53758
SRR036708__contig_4492	NorthernBobwhite_ScaffoldedDeNovo_contig_774	56079
SRR036708__contig_2290	NorthernBobwhite_ScaffoldedDeNovo_contig_775	331
SRR036708__contig_20241	NorthernBobwhite_ScaffoldedDeNovo_contig_775	21289
SRR036708__contig_19150	NorthernBobwhite_ScaffoldedDeNovo_contig_775	24108
SRR036708__contig_7372	NorthernBobwhite_ScaffoldedDeNovo_contig_775	27638
SRR036708__contig_8755	NorthernBobwhite_ScaffoldedDeNovo_contig_775	36771
SRR036708__contig_11735	NorthernBobwhite_ScaffoldedDeNovo_contig_775	42251
SRR036708__contig_5871	NorthernBobwhite_ScaffoldedDeNovo_contig_785	107536
SRR036708__contig_8566	NorthernBobwhite_ScaffoldedDeNovo_contig_785	109502
SRR036708__contig_7705	NorthernBobwhite_ScaffoldedDeNovo_contig_785	110169
SRR036708__contig_1702	NorthernBobwhite_ScaffoldedDeNovo_contig_786	7087
SRR036708__contig_16047	NorthernBobwhite_ScaffoldedDeNovo_contig_793	1778
SRR036708__contig_14741	NorthernBobwhite_ScaffoldedDeNovo_contig_793	2229
SRR036708__contig_12118	NorthernBobwhite_ScaffoldedDeNovo_contig_793	3388
SRR036708__contig_18744	NorthernBobwhite_ScaffoldedDeNovo_contig_794	10231
SRR036708__contig_16174	NorthernBobwhite_ScaffoldedDeNovo_contig_794	10772
SRR036708__contig_17920	NorthernBobwhite_ScaffoldedDeNovo_contig_794	11176
SRR036708__contig_11709	NorthernBobwhite_ScaffoldedDeNovo_contig_794	12162
SRR036708__contig_21215	NorthernBobwhite_ScaffoldedDeNovo_contig_795	5374
SRR036708__contig_9130	NorthernBobwhite_ScaffoldedDeNovo_contig_795	13903
SRR036708__contig_8286	NorthernBobwhite_ScaffoldedDeNovo_contig_796	26746
SRR036708__contig_17674	NorthernBobwhite_ScaffoldedDeNovo_contig_799	20370
SRR036708__contig_17125	NorthernBobwhite_ScaffoldedDeNovo_contig_805	36170
SRR036708__contig_9745	NorthernBobwhite_ScaffoldedDeNovo_contig_805	61080
SRR036708__contig_6327	NorthernBobwhite_ScaffoldedDeNovo_contig_805	61401
SRR036708__contig_11851	NorthernBobwhite_ScaffoldedDeNovo_contig_805	62752
SRR036708__contig_16625	NorthernBobwhite_ScaffoldedDeNovo_contig_813	2440
SRR036708__contig_20133	NorthernBobwhite_ScaffoldedDeNovo_contig_813	5348
SRR036708__contig_13042	NorthernBobwhite_ScaffoldedDeNovo_contig_813	22659
SRR036708__contig_9009	NorthernBobwhite_ScaffoldedDeNovo_contig_813	24271
SRR036708__contig_17759	NorthernBobwhite_ScaffoldedDeNovo_contig_813	30566
SRR036708__contig_10698	NorthernBobwhite_ScaffoldedDeNovo_contig_813	31495
SRR036708__contig_20009	NorthernBobwhite_ScaffoldedDeNovo_contig_814	3034
SRR036708__contig_17684	NorthernBobwhite_ScaffoldedDeNovo_contig_814	11156
SRR036708__contig_7536	NorthernBobwhite_ScaffoldedDeNovo_contig_814	12877
SRR036708__contig_18862	NorthernBobwhite_ScaffoldedDeNovo_contig_814	13506
SRR036708__contig_13869	NorthernBobwhite_ScaffoldedDeNovo_contig_816	894
SRR036708__contig_8621	NorthernBobwhite_ScaffoldedDeNovo_contig_819	22909
SRR036708__contig_17329	NorthernBobwhite_ScaffoldedDeNovo_contig_820	74247
SRR036708__contig_1023	NorthernBobwhite_ScaffoldedDeNovo_contig_820	97187
SRR036708__contig_12809	NorthernBobwhite_ScaffoldedDeNovo_contig_820	97835
SRR036708__contig_3244	NorthernBobwhite_ScaffoldedDeNovo_contig_820	106128
SRR036708__contig_16242	NorthernBobwhite_ScaffoldedDeNovo_contig_820	106953
SRR036708__contig_12183	NorthernBobwhite_ScaffoldedDeNovo_contig_820	111318
SRR036708__contig_19100	NorthernBobwhite_ScaffoldedDeNovo_contig_820	111709
SRR036708__contig_14752	NorthernBobwhite_ScaffoldedDeNovo_contig_820	185311
SRR036708__contig_3333	NorthernBobwhite_ScaffoldedDeNovo_contig_820	186339
SRR036708__contig_250	NorthernBobwhite_ScaffoldedDeNovo_contig_820	187165
SRR036708__contig_19593	NorthernBobwhite_ScaffoldedDeNovo_contig_823	64188
SRR036708__contig_18304	NorthernBobwhite_ScaffoldedDeNovo_contig_824	7655
SRR036708__contig_9013	NorthernBobwhite_ScaffoldedDeNovo_contig_824	8368
SRR036708__contig_6036	NorthernBobwhite_ScaffoldedDeNovo_contig_824	71903
SRR036708__contig_959	NorthernBobwhite_ScaffoldedDeNovo_contig_824	73352
SRR036708__contig_16128	NorthernBobwhite_ScaffoldedDeNovo_contig_824	103225
SRR036708__contig_8891	NorthernBobwhite_ScaffoldedDeNovo_contig_824	104864
SRR036708__contig_3657	NorthernBobwhite_ScaffoldedDeNovo_contig_824	124342
SRR036708__contig_18516	NorthernBobwhite_ScaffoldedDeNovo_contig_825	83
SRR036708__contig_10055	NorthernBobwhite_ScaffoldedDeNovo_contig_825	604
SRR036708__contig_12409	NorthernBobwhite_ScaffoldedDeNovo_contig_825	16510
SRR036708__contig_5902	NorthernBobwhite_ScaffoldedDeNovo_contig_825	32446
SRR036708__contig_12606	NorthernBobwhite_ScaffoldedDeNovo_contig_825	43886
SRR036708__contig_17827	NorthernBobwhite_ScaffoldedDeNovo_contig_825	54646
SRR036708__contig_19943	NorthernBobwhite_ScaffoldedDeNovo_contig_825	83582
SRR036708__contig_20546	NorthernBobwhite_ScaffoldedDeNovo_contig_828	43919
SRR036708__contig_6903	NorthernBobwhite_ScaffoldedDeNovo_contig_828	161609
SRR036708__contig_2797	NorthernBobwhite_ScaffoldedDeNovo_contig_828	162407
SRR036708__contig_14519	NorthernBobwhite_ScaffoldedDeNovo_contig_830	44452
SRR036708__contig_20193	NorthernBobwhite_ScaffoldedDeNovo_contig_832	3489
SRR036708__contig_4812	NorthernBobwhite_ScaffoldedDeNovo_contig_832	4055
SRR036708__contig_8399	NorthernBobwhite_ScaffoldedDeNovo_contig_834	11681
SRR036708__contig_15915	NorthernBobwhite_ScaffoldedDeNovo_contig_834	27520
SRR036708__contig_20869	NorthernBobwhite_ScaffoldedDeNovo_contig_834	29479
SRR036708__contig_15405	NorthernBobwhite_ScaffoldedDeNovo_contig_844	10015
SRR036708__contig_6775	NorthernBobwhite_ScaffoldedDeNovo_contig_844	39684
SRR036708__contig_17179	NorthernBobwhite_ScaffoldedDeNovo_contig_844	40350
SRR036708__contig_12949	NorthernBobwhite_ScaffoldedDeNovo_contig_848	9256
SRR036708__contig_4132	NorthernBobwhite_ScaffoldedDeNovo_contig_848	27334
SRR036708__contig_8591	NorthernBobwhite_ScaffoldedDeNovo_contig_848	30191
SRR036708__contig_7397	NorthernBobwhite_ScaffoldedDeNovo_contig_848	55261
SRR036708__contig_8130	NorthernBobwhite_ScaffoldedDeNovo_contig_848	59229
SRR036708__contig_1815	NorthernBobwhite_ScaffoldedDeNovo_contig_848	64351
SRR036708__contig_15157	NorthernBobwhite_ScaffoldedDeNovo_contig_848	113894
SRR036708__contig_19639	NorthernBobwhite_ScaffoldedDeNovo_contig_848	114488
SRR036708__contig_8044	NorthernBobwhite_ScaffoldedDeNovo_contig_854	118136
SRR036708__contig_11764	NorthernBobwhite_ScaffoldedDeNovo_contig_854	123208
SRR036708__contig_11765	NorthernBobwhite_ScaffoldedDeNovo_contig_854	124129
SRR036708__contig_4322	NorthernBobwhite_ScaffoldedDeNovo_contig_854	126577
SRR036708__contig_9180	NorthernBobwhite_ScaffoldedDeNovo_contig_854	148304
SRR036708__contig_19670	NorthernBobwhite_ScaffoldedDeNovo_contig_854	150976
SRR036708__contig_9416	NorthernBobwhite_ScaffoldedDeNovo_contig_856	4252
SRR036708__contig_11753	NorthernBobwhite_ScaffoldedDeNovo_contig_857	3521
SRR036708__contig_8622	NorthernBobwhite_ScaffoldedDeNovo_contig_857	46971
SRR036708__contig_12511	NorthernBobwhite_ScaffoldedDeNovo_contig_857	47409
SRR036708__contig_16170	NorthernBobwhite_ScaffoldedDeNovo_contig_858	16785
SRR036708__contig_16934	NorthernBobwhite_ScaffoldedDeNovo_contig_858	29225
SRR036708__contig_19724	NorthernBobwhite_ScaffoldedDeNovo_contig_858	30871
SRR036708__contig_10005	NorthernBobwhite_ScaffoldedDeNovo_contig_860	4231
SRR036708__contig_17513	NorthernBobwhite_ScaffoldedDeNovo_contig_860	17809
SRR036708__contig_16929	NorthernBobwhite_ScaffoldedDeNovo_contig_860	167944
SRR036708__contig_3590	NorthernBobwhite_ScaffoldedDeNovo_contig_860	171284
SRR036708__contig_20450	NorthernBobwhite_ScaffoldedDeNovo_contig_861	11435
SRR036708__contig_6515	NorthernBobwhite_ScaffoldedDeNovo_contig_864	12342
SRR036708__contig_9797	NorthernBobwhite_ScaffoldedDeNovo_contig_864	13068
SRR036708__contig_16953	NorthernBobwhite_ScaffoldedDeNovo_contig_865	32191
SRR036708__contig_3746	NorthernBobwhite_ScaffoldedDeNovo_contig_867	33127
SRR036708__contig_13695	NorthernBobwhite_ScaffoldedDeNovo_contig_867	121162
SRR036708__contig_20010	NorthernBobwhite_ScaffoldedDeNovo_contig_869	25627
SRR036708__contig_5584	NorthernBobwhite_ScaffoldedDeNovo_contig_869	28196
SRR036708__contig_11484	NorthernBobwhite_ScaffoldedDeNovo_contig_870	5743
SRR036708__contig_7105	NorthernBobwhite_ScaffoldedDeNovo_contig_872	171
SRR036708__contig_19781	NorthernBobwhite_ScaffoldedDeNovo_contig_872	3274
SRR036708__contig_13354	NorthernBobwhite_ScaffoldedDeNovo_contig_872	15509
SRR036708__contig_4706	NorthernBobwhite_ScaffoldedDeNovo_contig_875	3767
SRR036708__contig_19138	NorthernBobwhite_ScaffoldedDeNovo_contig_875	140906
SRR036708__contig_13647	NorthernBobwhite_ScaffoldedDeNovo_contig_875	144140
SRR036708__contig_15978	NorthernBobwhite_ScaffoldedDeNovo_contig_875	244840
SRR036708__contig_10178	NorthernBobwhite_ScaffoldedDeNovo_contig_880	578
SRR036708__contig_10239	NorthernBobwhite_ScaffoldedDeNovo_contig_881	13836
SRR036708__contig_20127	NorthernBobwhite_ScaffoldedDeNovo_contig_883	531
SRR036708__contig_16422	NorthernBobwhite_ScaffoldedDeNovo_contig_883	1888
SRR036708__contig_1688	NorthernBobwhite_ScaffoldedDeNovo_contig_883	14095
SRR036708__contig_1446	NorthernBobwhite_ScaffoldedDeNovo_contig_883	34322
SRR036708__contig_17727	NorthernBobwhite_ScaffoldedDeNovo_contig_883	35525
SRR036708__contig_2738	NorthernBobwhite_ScaffoldedDeNovo_contig_883	35954
SRR036708__contig_10377	NorthernBobwhite_ScaffoldedDeNovo_contig_883	37740
SRR036708__contig_10643	NorthernBobwhite_ScaffoldedDeNovo_contig_883	38882
SRR036708__contig_16427	NorthernBobwhite_ScaffoldedDeNovo_contig_883	62777
SRR036708__contig_15703	NorthernBobwhite_ScaffoldedDeNovo_contig_883	66517
SRR036708__contig_1069	NorthernBobwhite_ScaffoldedDeNovo_contig_883	85489
SRR036708__contig_3731	NorthernBobwhite_ScaffoldedDeNovo_contig_883	106724
SRR036708__contig_7588	NorthernBobwhite_ScaffoldedDeNovo_contig_888	38771
SRR036708__contig_13536	NorthernBobwhite_ScaffoldedDeNovo_contig_889	15616
SRR036708__contig_16552	NorthernBobwhite_ScaffoldedDeNovo_contig_889	31724
SRR036708__contig_14642	NorthernBobwhite_ScaffoldedDeNovo_contig_889	32482
SRR036708__contig_18608	NorthernBobwhite_ScaffoldedDeNovo_contig_889	47166
SRR036708__contig_2783	NorthernBobwhite_ScaffoldedDeNovo_contig_889	73069
SRR036708__contig_21291	NorthernBobwhite_ScaffoldedDeNovo_contig_889	75813
SRR036708__contig_9081	NorthernBobwhite_ScaffoldedDeNovo_contig_889	83302
SRR036708__contig_8020	NorthernBobwhite_ScaffoldedDeNovo_contig_889	83504
SRR036708__contig_9551	NorthernBobwhite_ScaffoldedDeNovo_contig_890	6589
SRR036708__contig_19956	NorthernBobwhite_ScaffoldedDeNovo_contig_890	17386
SRR036708__contig_5713	NorthernBobwhite_ScaffoldedDeNovo_contig_890	28917
SRR036708__contig_3102	NorthernBobwhite_ScaffoldedDeNovo_contig_890	39352
SRR036708__contig_10532	NorthernBobwhite_ScaffoldedDeNovo_contig_890	42344
SRR036708__contig_9245	NorthernBobwhite_ScaffoldedDeNovo_contig_890	47662
SRR036708__contig_15263	NorthernBobwhite_ScaffoldedDeNovo_contig_890	49093
SRR036708__contig_20890	NorthernBobwhite_ScaffoldedDeNovo_contig_890	58872
SRR036708__contig_1052	NorthernBobwhite_ScaffoldedDeNovo_contig_890	61272
SRR036708__contig_12698	NorthernBobwhite_ScaffoldedDeNovo_contig_895	44496
SRR036708__contig_19788	NorthernBobwhite_ScaffoldedDeNovo_contig_895	52914
SRR036708__contig_17182	NorthernBobwhite_ScaffoldedDeNovo_contig_895	56976
SRR036708__contig_17219	NorthernBobwhite_ScaffoldedDeNovo_contig_895	63999
SRR036708__contig_13656	NorthernBobwhite_ScaffoldedDeNovo_contig_895	68332
SRR036708__contig_341	NorthernBobwhite_ScaffoldedDeNovo_contig_895	74143
SRR036708__contig_11417	NorthernBobwhite_ScaffoldedDeNovo_contig_895	80446
SRR036708__contig_1453	NorthernBobwhite_ScaffoldedDeNovo_contig_895	85651
SRR036708__contig_6512	NorthernBobwhite_ScaffoldedDeNovo_contig_895	87147
SRR036708__contig_15040	NorthernBobwhite_ScaffoldedDeNovo_contig_898	28881
SRR036708__contig_12906	NorthernBobwhite_ScaffoldedDeNovo_contig_898	32223
SRR036708__contig_2723	NorthernBobwhite_ScaffoldedDeNovo_contig_898	32321
SRR036708__contig_9049	NorthernBobwhite_ScaffoldedDeNovo_contig_898	98766
SRR036708__contig_17844	NorthernBobwhite_ScaffoldedDeNovo_contig_898	144157
SRR036708__contig_6646	NorthernBobwhite_ScaffoldedDeNovo_contig_898	152398
SRR036708__contig_16412	NorthernBobwhite_ScaffoldedDeNovo_contig_899	2720
SRR036708__contig_9756	NorthernBobwhite_ScaffoldedDeNovo_contig_899	6977
SRR036708__contig_2615	NorthernBobwhite_ScaffoldedDeNovo_contig_899	30121
SRR036708__contig_3519	NorthernBobwhite_ScaffoldedDeNovo_contig_899	32802
SRR036708__contig_19961	NorthernBobwhite_ScaffoldedDeNovo_contig_899	36635
SRR036708__contig_9766	NorthernBobwhite_ScaffoldedDeNovo_contig_903	7322
SRR036708__contig_15039	NorthernBobwhite_ScaffoldedDeNovo_contig_904	8579
SRR036708__contig_7550	NorthernBobwhite_ScaffoldedDeNovo_contig_904	11267
SRR036708__contig_17823	NorthernBobwhite_ScaffoldedDeNovo_contig_904	63989
SRR036708__contig_504	NorthernBobwhite_ScaffoldedDeNovo_contig_912	5393
SRR036708__contig_10903	NorthernBobwhite_ScaffoldedDeNovo_contig_912	69755
SRR036708__contig_9522	NorthernBobwhite_ScaffoldedDeNovo_contig_912	86280
SRR036708__contig_9869	NorthernBobwhite_ScaffoldedDeNovo_contig_912	172142
SRR036708__contig_4385	NorthernBobwhite_ScaffoldedDeNovo_contig_912	174094
SRR036708__contig_6756	NorthernBobwhite_ScaffoldedDeNovo_contig_912	175218
SRR036708__contig_1954	NorthernBobwhite_ScaffoldedDeNovo_contig_912	175811
SRR036708__contig_14612	NorthernBobwhite_ScaffoldedDeNovo_contig_912	185083
SRR036708__contig_4765	NorthernBobwhite_ScaffoldedDeNovo_contig_913	2183
SRR036708__contig_2046	NorthernBobwhite_ScaffoldedDeNovo_contig_913	12187
SRR036708__contig_6395	NorthernBobwhite_ScaffoldedDeNovo_contig_914	20730
SRR036708__contig_20549	NorthernBobwhite_ScaffoldedDeNovo_contig_914	32877
SRR036708__contig_17520	NorthernBobwhite_ScaffoldedDeNovo_contig_914	34932
SRR036708__contig_5409	NorthernBobwhite_ScaffoldedDeNovo_contig_914	35381
SRR036708__contig_683	NorthernBobwhite_ScaffoldedDeNovo_contig_920	147105
SRR036708__contig_15508	NorthernBobwhite_ScaffoldedDeNovo_contig_920	152530
SRR036708__contig_12658	NorthernBobwhite_ScaffoldedDeNovo_contig_925	753
SRR036708__contig_13529	NorthernBobwhite_ScaffoldedDeNovo_contig_926	36808
SRR036708__contig_10779	NorthernBobwhite_ScaffoldedDeNovo_contig_929	23940
SRR036708__contig_3182	NorthernBobwhite_ScaffoldedDeNovo_contig_929	53523
SRR036708__contig_13789	NorthernBobwhite_ScaffoldedDeNovo_contig_931	30543
SRR036708__contig_40	NorthernBobwhite_ScaffoldedDeNovo_contig_931	31066
SRR036708__contig_1147	NorthernBobwhite_ScaffoldedDeNovo_contig_932	15787
SRR036708__contig_20582	NorthernBobwhite_ScaffoldedDeNovo_contig_932	16687
SRR036708__contig_18272	NorthernBobwhite_ScaffoldedDeNovo_contig_932	17122
SRR036708__contig_886	NorthernBobwhite_ScaffoldedDeNovo_contig_932	22390
SRR036708__contig_7518	NorthernBobwhite_ScaffoldedDeNovo_contig_933	62511
SRR036708__contig_1509	NorthernBobwhite_ScaffoldedDeNovo_contig_933	101792
SRR036708__contig_20484	NorthernBobwhite_ScaffoldedDeNovo_contig_933	136286
SRR036708__contig_9862	NorthernBobwhite_ScaffoldedDeNovo_contig_934	83341
SRR036708__contig_15383	NorthernBobwhite_ScaffoldedDeNovo_contig_934	84414
SRR036708__contig_4200	NorthernBobwhite_ScaffoldedDeNovo_contig_934	101699
SRR036708__contig_1683	NorthernBobwhite_ScaffoldedDeNovo_contig_934	195539
SRR036708__contig_6213	NorthernBobwhite_ScaffoldedDeNovo_contig_934	273273
SRR036708__contig_19166	NorthernBobwhite_ScaffoldedDeNovo_contig_935	28422
SRR036708__contig_2228	NorthernBobwhite_ScaffoldedDeNovo_contig_935	52595
SRR036708__contig_8720	NorthernBobwhite_ScaffoldedDeNovo_contig_935	59152
SRR036708__contig_16455	NorthernBobwhite_ScaffoldedDeNovo_contig_935	64262
SRR036708__contig_12661	NorthernBobwhite_ScaffoldedDeNovo_contig_935	65210
SRR036708__contig_118	NorthernBobwhite_ScaffoldedDeNovo_contig_935	70553
SRR036708__contig_17879	NorthernBobwhite_ScaffoldedDeNovo_contig_939	5234
SRR036708__contig_15619	NorthernBobwhite_ScaffoldedDeNovo_contig_939	5529
SRR036708__contig_3201	NorthernBobwhite_ScaffoldedDeNovo_contig_939	39834
SRR036708__contig_19399	NorthernBobwhite_ScaffoldedDeNovo_contig_939	68890
SRR036708__contig_150	NorthernBobwhite_ScaffoldedDeNovo_contig_939	70204
SRR036708__contig_1428	NorthernBobwhite_ScaffoldedDeNovo_contig_941	30626
SRR036708__contig_9729	NorthernBobwhite_ScaffoldedDeNovo_contig_941	35840
SRR036708__contig_9203	NorthernBobwhite_ScaffoldedDeNovo_contig_941	36230
SRR036708__contig_953	NorthernBobwhite_ScaffoldedDeNovo_contig_941	49130
SRR036708__contig_9856	NorthernBobwhite_ScaffoldedDeNovo_contig_941	51276
SRR036708__contig_7367	NorthernBobwhite_ScaffoldedDeNovo_contig_942	1815
SRR036708__contig_11060	NorthernBobwhite_ScaffoldedDeNovo_contig_942	45458
SRR036708__contig_11427	NorthernBobwhite_ScaffoldedDeNovo_contig_942	52110
SRR036708__contig_20417	NorthernBobwhite_ScaffoldedDeNovo_contig_942	52866
SRR036708__contig_12608	NorthernBobwhite_ScaffoldedDeNovo_contig_942	53347
SRR036708__contig_1479	NorthernBobwhite_ScaffoldedDeNovo_contig_944	12300
SRR036708__contig_12232	NorthernBobwhite_ScaffoldedDeNovo_contig_948	495
SRR036708__contig_2809	NorthernBobwhite_ScaffoldedDeNovo_contig_948	47561
SRR036708__contig_10180	NorthernBobwhite_ScaffoldedDeNovo_contig_948	48292
SRR036708__contig_9078	NorthernBobwhite_ScaffoldedDeNovo_contig_948	51439
SRR036708__contig_7889	NorthernBobwhite_ScaffoldedDeNovo_contig_955	195
SRR036708__contig_1961	NorthernBobwhite_ScaffoldedDeNovo_contig_958	7657
SRR036708__contig_1532	NorthernBobwhite_ScaffoldedDeNovo_contig_960	729
SRR036708__contig_14906	NorthernBobwhite_ScaffoldedDeNovo_contig_960	5235
SRR036708__contig_14431	NorthernBobwhite_ScaffoldedDeNovo_contig_960	21150
SRR036708__contig_9561	NorthernBobwhite_ScaffoldedDeNovo_contig_961	63862
SRR036708__contig_18457	NorthernBobwhite_ScaffoldedDeNovo_contig_966	4158
SRR036708__contig_5949	NorthernBobwhite_ScaffoldedDeNovo_contig_966	19808
SRR036708__contig_2609	NorthernBobwhite_ScaffoldedDeNovo_contig_966	27283
SRR036708__contig_6507	NorthernBobwhite_ScaffoldedDeNovo_contig_966	31671
SRR036708__contig_8977	NorthernBobwhite_ScaffoldedDeNovo_contig_971	63984
SRR036708__contig_3305	NorthernBobwhite_ScaffoldedDeNovo_contig_973	7142
SRR036708__contig_17311	NorthernBobwhite_ScaffoldedDeNovo_contig_973	12029
SRR036708__contig_2920	NorthernBobwhite_ScaffoldedDeNovo_contig_973	56416
SRR036708__contig_17706	NorthernBobwhite_ScaffoldedDeNovo_contig_974	1254
SRR036708__contig_16809	NorthernBobwhite_ScaffoldedDeNovo_contig_975	209552
SRR036708__contig_11064	NorthernBobwhite_ScaffoldedDeNovo_contig_975	213665
SRR036708__contig_17137	NorthernBobwhite_ScaffoldedDeNovo_contig_975	214238
SRR036708__contig_3851	NorthernBobwhite_ScaffoldedDeNovo_contig_976	17714
SRR036708__contig_17218	NorthernBobwhite_ScaffoldedDeNovo_contig_976	36681
SRR036708__contig_11534	NorthernBobwhite_ScaffoldedDeNovo_contig_977	20002
SRR036708__contig_4579	NorthernBobwhite_ScaffoldedDeNovo_contig_977	29971
SRR036708__contig_21123	NorthernBobwhite_ScaffoldedDeNovo_contig_977	34155
SRR036708__contig_7848	NorthernBobwhite_ScaffoldedDeNovo_contig_977	34402
SRR036708__contig_1308	NorthernBobwhite_ScaffoldedDeNovo_contig_977	35584
SRR036708__contig_4181	NorthernBobwhite_ScaffoldedDeNovo_contig_978	1
SRR036708__contig_9677	NorthernBobwhite_ScaffoldedDeNovo_contig_978	526
SRR036708__contig_15317	NorthernBobwhite_ScaffoldedDeNovo_contig_985	36730
SRR036708__contig_10844	NorthernBobwhite_ScaffoldedDeNovo_contig_986	35803
SRR036708__contig_4116	NorthernBobwhite_ScaffoldedDeNovo_contig_986	36166
SRR036708__contig_14119	NorthernBobwhite_ScaffoldedDeNovo_contig_986	36753
SRR036708__contig_13417	NorthernBobwhite_ScaffoldedDeNovo_contig_986	48401
SRR036708__contig_7993	NorthernBobwhite_ScaffoldedDeNovo_contig_986	48971
SRR036708__contig_18583	NorthernBobwhite_ScaffoldedDeNovo_contig_986	49290
SRR036708__contig_6769	NorthernBobwhite_ScaffoldedDeNovo_contig_986	49533
SRR036708__contig_2881	NorthernBobwhite_ScaffoldedDeNovo_contig_986	50796
SRR036708__contig_9141	NorthernBobwhite_ScaffoldedDeNovo_contig_987	11727
SRR036708__contig_12428	NorthernBobwhite_ScaffoldedDeNovo_contig_991	29124
SRR036708__contig_2603	NorthernBobwhite_ScaffoldedDeNovo_contig_991	29715
SRR036708__contig_8162	NorthernBobwhite_ScaffoldedDeNovo_contig_991	34524
SRR036708__contig_10865	NorthernBobwhite_ScaffoldedDeNovo_contig_994	2345
SRR036708__contig_9155	NorthernBobwhite_ScaffoldedDeNovo_contig_994	3337
SRR036708__contig_17925	NorthernBobwhite_ScaffoldedDeNovo_contig_996	117784
SRR036708__contig_3514	NorthernBobwhite_ScaffoldedDeNovo_contig_996	118519
SRR036708__contig_12217	NorthernBobwhite_ScaffoldedDeNovo_contig_996	119737
SRR036708__contig_10133	NorthernBobwhite_ScaffoldedDeNovo_contig_996	120260
SRR036708__contig_9769	NorthernBobwhite_ScaffoldedDeNovo_contig_996	121589
SRR036708__contig_14325	NorthernBobwhite_ScaffoldedDeNovo_contig_996	137727
SRR036708__contig_10773	NorthernBobwhite_ScaffoldedDeNovo_contig_999	26019
SRR036708__contig_8851	NorthernBobwhite_ScaffoldedDeNovo_contig_999	55648
SRR036708__contig_4428	NorthernBobwhite_ScaffoldedDeNovo_contig_999	63930
SRR036708__contig_10344	NorthernBobwhite_ScaffoldedDeNovo_contig_999	90742
SRR036708__contig_8721	NorthernBobwhite_ScaffoldedDeNovo_contig_999	100484
SRR036708__contig_13148	NorthernBobwhite_ScaffoldedDeNovo_contig_999	101279
SRR036708__contig_3858	NorthernBobwhite_ScaffoldedDeNovo_contig_1000	126337
SRR036708__contig_11348	NorthernBobwhite_ScaffoldedDeNovo_contig_1000	126961
SRR036708__contig_8116	NorthernBobwhite_ScaffoldedDeNovo_contig_1000	128036
SRR036708__contig_3744	NorthernBobwhite_ScaffoldedDeNovo_contig_1007	6740
SRR036708__contig_16087	NorthernBobwhite_ScaffoldedDeNovo_contig_1007	7579
SRR036708__contig_19844	NorthernBobwhite_ScaffoldedDeNovo_contig_1007	8076
SRR036708__contig_3342	NorthernBobwhite_ScaffoldedDeNovo_contig_1010	86468
SRR036708__contig_15348	NorthernBobwhite_ScaffoldedDeNovo_contig_1010	88159
SRR036708__contig_20054	NorthernBobwhite_ScaffoldedDeNovo_contig_1010	90594
SRR036708__contig_14511	NorthernBobwhite_ScaffoldedDeNovo_contig_1010	98148
SRR036708__contig_4599	NorthernBobwhite_ScaffoldedDeNovo_contig_1011	4260
SRR036708__contig_19727	NorthernBobwhite_ScaffoldedDeNovo_contig_1011	80692
SRR036708__contig_15198	NorthernBobwhite_ScaffoldedDeNovo_contig_1011	153279
SRR036708__contig_1796	NorthernBobwhite_ScaffoldedDeNovo_contig_1012	82486
SRR036708__contig_19621	NorthernBobwhite_ScaffoldedDeNovo_contig_1012	84063
SRR036708__contig_20813	NorthernBobwhite_ScaffoldedDeNovo_contig_1012	86022
SRR036708__contig_6483	NorthernBobwhite_ScaffoldedDeNovo_contig_1015	7239
SRR036708__contig_5075	NorthernBobwhite_ScaffoldedDeNovo_contig_1015	13861
SRR036708__contig_8550	NorthernBobwhite_ScaffoldedDeNovo_contig_1015	20397
SRR036708__contig_9632	NorthernBobwhite_ScaffoldedDeNovo_contig_1015	20837
SRR036708__contig_9037	NorthernBobwhite_ScaffoldedDeNovo_contig_1015	21649
SRR036708__contig_20575	NorthernBobwhite_ScaffoldedDeNovo_contig_1015	23549
SRR036708__contig_11437	NorthernBobwhite_ScaffoldedDeNovo_contig_1015	26304
SRR036708__contig_14194	NorthernBobwhite_ScaffoldedDeNovo_contig_1015	28351
SRR036708__contig_6640	NorthernBobwhite_ScaffoldedDeNovo_contig_1016	106217
SRR036708__contig_20843	NorthernBobwhite_ScaffoldedDeNovo_contig_1016	113329
SRR036708__contig_1004	NorthernBobwhite_ScaffoldedDeNovo_contig_1016	116139
SRR036708__contig_18202	NorthernBobwhite_ScaffoldedDeNovo_contig_1016	117311
SRR036708__contig_18342	NorthernBobwhite_ScaffoldedDeNovo_contig_1016	146784
SRR036708__contig_4402	NorthernBobwhite_ScaffoldedDeNovo_contig_1016	166852
SRR036708__contig_20013	NorthernBobwhite_ScaffoldedDeNovo_contig_1016	169691
SRR036708__contig_4950	NorthernBobwhite_ScaffoldedDeNovo_contig_1020	3056
SRR036708__contig_8736	NorthernBobwhite_ScaffoldedDeNovo_contig_1020	4060
SRR036708__contig_8225	NorthernBobwhite_ScaffoldedDeNovo_contig_1027	27087
SRR036708__contig_20672	NorthernBobwhite_ScaffoldedDeNovo_contig_1027	28818
SRR036708__contig_12846	NorthernBobwhite_ScaffoldedDeNovo_contig_1027	78066
SRR036708__contig_7901	NorthernBobwhite_ScaffoldedDeNovo_contig_1027	80776
SRR036708__contig_11168	NorthernBobwhite_ScaffoldedDeNovo_contig_1027	86977
SRR036708__contig_9218	NorthernBobwhite_ScaffoldedDeNovo_contig_1027	109299
SRR036708__contig_10411	NorthernBobwhite_ScaffoldedDeNovo_contig_1027	113235
SRR036708__contig_20470	NorthernBobwhite_ScaffoldedDeNovo_contig_1029	32953
SRR036708__contig_9341	NorthernBobwhite_ScaffoldedDeNovo_contig_1037	18979
SRR036708__contig_3205	NorthernBobwhite_ScaffoldedDeNovo_contig_1037	22416
SRR036708__contig_3206	NorthernBobwhite_ScaffoldedDeNovo_contig_1037	22596
SRR036708__contig_18959	NorthernBobwhite_ScaffoldedDeNovo_contig_1037	34586
SRR036708__contig_10540	NorthernBobwhite_ScaffoldedDeNovo_contig_1037	54927
SRR036708__contig_5913	NorthernBobwhite_ScaffoldedDeNovo_contig_1037	74889
SRR036708__contig_20652	NorthernBobwhite_ScaffoldedDeNovo_contig_1038	37343
SRR036708__contig_807	NorthernBobwhite_ScaffoldedDeNovo_contig_1038	75158
SRR036708__contig_6343	NorthernBobwhite_ScaffoldedDeNovo_contig_1038	144196
SRR036708__contig_2543	NorthernBobwhite_ScaffoldedDeNovo_contig_1038	145546
SRR036708__contig_8290	NorthernBobwhite_ScaffoldedDeNovo_contig_1038	146230
SRR036708__contig_5226	NorthernBobwhite_ScaffoldedDeNovo_contig_1038	151493
SRR036708__contig_14666	NorthernBobwhite_ScaffoldedDeNovo_contig_1038	157870
SRR036708__contig_10358	NorthernBobwhite_ScaffoldedDeNovo_contig_1038	159634
SRR036708__contig_9475	NorthernBobwhite_ScaffoldedDeNovo_contig_1042	96668
SRR036708__contig_13777	NorthernBobwhite_ScaffoldedDeNovo_contig_1042	97786
SRR036708__contig_4743	NorthernBobwhite_ScaffoldedDeNovo_contig_1042	97995
SRR036708__contig_1025	NorthernBobwhite_ScaffoldedDeNovo_contig_1046	35604
SRR036708__contig_15177	NorthernBobwhite_ScaffoldedDeNovo_contig_1047	31937
SRR036708__contig_16478	NorthernBobwhite_ScaffoldedDeNovo_contig_1047	37075
SRR036708__contig_20833	NorthernBobwhite_ScaffoldedDeNovo_contig_1047	37405
SRR036708__contig_4995	NorthernBobwhite_ScaffoldedDeNovo_contig_1047	38772
SRR036708__contig_8449	NorthernBobwhite_ScaffoldedDeNovo_contig_1048	3774
SRR036708__contig_9435	NorthernBobwhite_ScaffoldedDeNovo_contig_1048	61437
SRR036708__contig_1337	NorthernBobwhite_ScaffoldedDeNovo_contig_1048	64797
SRR036708__contig_6446	NorthernBobwhite_ScaffoldedDeNovo_contig_1048	86013
SRR036708__contig_6214	NorthernBobwhite_ScaffoldedDeNovo_contig_1048	86272
SRR036708__contig_1078	NorthernBobwhite_ScaffoldedDeNovo_contig_1048	88029
SRR036708__contig_14604	NorthernBobwhite_ScaffoldedDeNovo_contig_1055	40314
SRR036708__contig_5019	NorthernBobwhite_ScaffoldedDeNovo_contig_1056	1
SRR036708__contig_18741	NorthernBobwhite_ScaffoldedDeNovo_contig_1059	61107
SRR036708__contig_21041	NorthernBobwhite_ScaffoldedDeNovo_contig_1059	61977
SRR036708__contig_5883	NorthernBobwhite_ScaffoldedDeNovo_contig_1059	77162
SRR036708__contig_2452	NorthernBobwhite_ScaffoldedDeNovo_contig_1061	2895
SRR036708__contig_19611	NorthernBobwhite_ScaffoldedDeNovo_contig_1061	3511
SRR036708__contig_14559	NorthernBobwhite_ScaffoldedDeNovo_contig_1061	4615
SRR036708__contig_7741	NorthernBobwhite_ScaffoldedDeNovo_contig_1061	18108
SRR036708__contig_19747	NorthernBobwhite_ScaffoldedDeNovo_contig_1061	21269
SRR036708__contig_6493	NorthernBobwhite_ScaffoldedDeNovo_contig_1061	21595
SRR036708__contig_1076	NorthernBobwhite_ScaffoldedDeNovo_contig_1061	22146
SRR036708__contig_14780	NorthernBobwhite_ScaffoldedDeNovo_contig_1061	40149
SRR036708__contig_20643	NorthernBobwhite_ScaffoldedDeNovo_contig_1061	42098
SRR036708__contig_19855	NorthernBobwhite_ScaffoldedDeNovo_contig_1061	44069
SRR036708__contig_8107	NorthernBobwhite_ScaffoldedDeNovo_contig_1061	45088
SRR036708__contig_13999	NorthernBobwhite_ScaffoldedDeNovo_contig_1061	63433
SRR036708__contig_13357	NorthernBobwhite_ScaffoldedDeNovo_contig_1061	64281
SRR036708__contig_8939	NorthernBobwhite_ScaffoldedDeNovo_contig_1062	10157
SRR036708__contig_8167	NorthernBobwhite_ScaffoldedDeNovo_contig_1062	18224
SRR036708__contig_19986	NorthernBobwhite_ScaffoldedDeNovo_contig_1062	19729
SRR036708__contig_7187	NorthernBobwhite_ScaffoldedDeNovo_contig_1065	11178
SRR036708__contig_19068	NorthernBobwhite_ScaffoldedDeNovo_contig_1065	11610
SRR036708__contig_6988	NorthernBobwhite_ScaffoldedDeNovo_contig_1065	21725
SRR036708__contig_17632	NorthernBobwhite_ScaffoldedDeNovo_contig_1065	22070
SRR036708__contig_5869	NorthernBobwhite_ScaffoldedDeNovo_contig_1065	23392
SRR036708__contig_16171	NorthernBobwhite_ScaffoldedDeNovo_contig_1065	28489
SRR036708__contig_17600	NorthernBobwhite_ScaffoldedDeNovo_contig_1073	15908
SRR036708__contig_14927	NorthernBobwhite_ScaffoldedDeNovo_contig_1073	19118
SRR036708__contig_14728	NorthernBobwhite_ScaffoldedDeNovo_contig_1073	21734
SRR036708__contig_5658	NorthernBobwhite_ScaffoldedDeNovo_contig_1073	28785
SRR036708__contig_21287	NorthernBobwhite_ScaffoldedDeNovo_contig_1073	40179
SRR036708__contig_8272	NorthernBobwhite_ScaffoldedDeNovo_contig_1073	41949
SRR036708__contig_50	NorthernBobwhite_ScaffoldedDeNovo_contig_1091	4186
SRR036708__contig_16112	NorthernBobwhite_ScaffoldedDeNovo_contig_1091	5024
SRR036708__contig_19779	NorthernBobwhite_ScaffoldedDeNovo_contig_1094	48602
SRR036708__contig_4240	NorthernBobwhite_ScaffoldedDeNovo_contig_1094	93059
SRR036708__contig_20507	NorthernBobwhite_ScaffoldedDeNovo_contig_1094	101603
SRR036708__contig_1175	NorthernBobwhite_ScaffoldedDeNovo_contig_1097	2989
SRR036708__contig_7121	NorthernBobwhite_ScaffoldedDeNovo_contig_1097	15586
SRR036708__contig_5958	NorthernBobwhite_ScaffoldedDeNovo_contig_1099	222
SRR036708__contig_15938	NorthernBobwhite_ScaffoldedDeNovo_contig_1101	2555
SRR036708__contig_11317	NorthernBobwhite_ScaffoldedDeNovo_contig_1102	6891
SRR036708__contig_19669	NorthernBobwhite_ScaffoldedDeNovo_contig_1102	7767
SRR036708__contig_16821	NorthernBobwhite_ScaffoldedDeNovo_contig_1102	8087
SRR036708__contig_9427	NorthernBobwhite_ScaffoldedDeNovo_contig_1102	32594
SRR036708__contig_4677	NorthernBobwhite_ScaffoldedDeNovo_contig_1102	43509
SRR036708__contig_15526	NorthernBobwhite_ScaffoldedDeNovo_contig_1106	57878
SRR036708__contig_18561	NorthernBobwhite_ScaffoldedDeNovo_contig_1109	75793
SRR036708__contig_9871	NorthernBobwhite_ScaffoldedDeNovo_contig_1112	9399
SRR036708__contig_7512	NorthernBobwhite_ScaffoldedDeNovo_contig_1112	9709
SRR036708__contig_8308	NorthernBobwhite_ScaffoldedDeNovo_contig_1114	41531
SRR036708__contig_4256	NorthernBobwhite_ScaffoldedDeNovo_contig_1114	41875
SRR036708__contig_18018	NorthernBobwhite_ScaffoldedDeNovo_contig_1114	48145
SRR036708__contig_10900	NorthernBobwhite_ScaffoldedDeNovo_contig_1117	18244
SRR036708__contig_7151	NorthernBobwhite_ScaffoldedDeNovo_contig_1117	72677
SRR036708__contig_16188	NorthernBobwhite_ScaffoldedDeNovo_contig_1117	76836
SRR036708__contig_19566	NorthernBobwhite_ScaffoldedDeNovo_contig_1117	77644
SRR036708__contig_1753	NorthernBobwhite_ScaffoldedDeNovo_contig_1119	25598
SRR036708__contig_1752	NorthernBobwhite_ScaffoldedDeNovo_contig_1119	27041
SRR036708__contig_20490	NorthernBobwhite_ScaffoldedDeNovo_contig_1119	27160
SRR036708__contig_19520	NorthernBobwhite_ScaffoldedDeNovo_contig_1119	27346
SRR036708__contig_20347	NorthernBobwhite_ScaffoldedDeNovo_contig_1119	28862
SRR036708__contig_19579	NorthernBobwhite_ScaffoldedDeNovo_contig_1119	47285
SRR036708__contig_15437	NorthernBobwhite_ScaffoldedDeNovo_contig_1119	49342
SRR036708__contig_3843	NorthernBobwhite_ScaffoldedDeNovo_contig_1119	50872
SRR036708__contig_13163	NorthernBobwhite_ScaffoldedDeNovo_contig_1119	51416
SRR036708__contig_9849	NorthernBobwhite_ScaffoldedDeNovo_contig_1119	52893
SRR036708__contig_10013	NorthernBobwhite_ScaffoldedDeNovo_contig_1119	54649
SRR036708__contig_4551	NorthernBobwhite_ScaffoldedDeNovo_contig_1121	57770
SRR036708__contig_15371	NorthernBobwhite_ScaffoldedDeNovo_contig_1121	58904
SRR036708__contig_16733	NorthernBobwhite_ScaffoldedDeNovo_contig_1121	60369
SRR036708__contig_7998	NorthernBobwhite_ScaffoldedDeNovo_contig_1123	26340
SRR036708__contig_2302	NorthernBobwhite_ScaffoldedDeNovo_contig_1123	26931
SRR036708__contig_7531	NorthernBobwhite_ScaffoldedDeNovo_contig_1123	72562
SRR036708__contig_4337	NorthernBobwhite_ScaffoldedDeNovo_contig_1123	92425
SRR036708__contig_5122	NorthernBobwhite_ScaffoldedDeNovo_contig_1123	121562
SRR036708__contig_11612	NorthernBobwhite_ScaffoldedDeNovo_contig_1135	11425
SRR036708__contig_16633	NorthernBobwhite_ScaffoldedDeNovo_contig_1137	69529
SRR036708__contig_3009	NorthernBobwhite_ScaffoldedDeNovo_contig_1137	75584
SRR036708__contig_3663	NorthernBobwhite_ScaffoldedDeNovo_contig_1137	77916
SRR036708__contig_19883	NorthernBobwhite_ScaffoldedDeNovo_contig_1137	78493
SRR036708__contig_20334	NorthernBobwhite_ScaffoldedDeNovo_contig_1137	85470
SRR036708__contig_10884	NorthernBobwhite_ScaffoldedDeNovo_contig_1137	186690
SRR036708__contig_11503	NorthernBobwhite_ScaffoldedDeNovo_contig_1137	191477
SRR036708__contig_11172	NorthernBobwhite_ScaffoldedDeNovo_contig_1137	278110
SRR036708__contig_8658	NorthernBobwhite_ScaffoldedDeNovo_contig_1141	33608
SRR036708__contig_20495	NorthernBobwhite_ScaffoldedDeNovo_contig_1141	35369
SRR036708__contig_21298	NorthernBobwhite_ScaffoldedDeNovo_contig_1145	11652
SRR036708__contig_14640	NorthernBobwhite_ScaffoldedDeNovo_contig_1145	11911
SRR036708__contig_3995	NorthernBobwhite_ScaffoldedDeNovo_contig_1145	12126
SRR036708__contig_1384	NorthernBobwhite_ScaffoldedDeNovo_contig_1154	647
SRR036708__contig_17560	NorthernBobwhite_ScaffoldedDeNovo_contig_1154	10484
SRR036708__contig_16001	NorthernBobwhite_ScaffoldedDeNovo_contig_1157	8514
SRR036708__contig_12152	NorthernBobwhite_ScaffoldedDeNovo_contig_1157	10390
SRR036708__contig_14124	NorthernBobwhite_ScaffoldedDeNovo_contig_1165	19425
SRR036708__contig_7326	NorthernBobwhite_ScaffoldedDeNovo_contig_1165	21618
SRR036708__contig_10550	NorthernBobwhite_ScaffoldedDeNovo_contig_1166	42946
SRR036708__contig_19958	NorthernBobwhite_ScaffoldedDeNovo_contig_1166	49850
SRR036708__contig_17367	NorthernBobwhite_ScaffoldedDeNovo_contig_1166	59322
SRR036708__contig_11911	NorthernBobwhite_ScaffoldedDeNovo_contig_1167	1754
SRR036708__contig_17280	NorthernBobwhite_ScaffoldedDeNovo_contig_1168	46146
SRR036708__contig_11121	NorthernBobwhite_ScaffoldedDeNovo_contig_1168	47264
SRR036708__contig_4316	NorthernBobwhite_ScaffoldedDeNovo_contig_1168	47917
SRR036708__contig_9214	NorthernBobwhite_ScaffoldedDeNovo_contig_1168	53735
SRR036708__contig_3991	NorthernBobwhite_ScaffoldedDeNovo_contig_1168	55312
SRR036708__contig_9657	NorthernBobwhite_ScaffoldedDeNovo_contig_1168	105834
SRR036708__contig_17617	NorthernBobwhite_ScaffoldedDeNovo_contig_1168	108146
SRR036708__contig_6510	NorthernBobwhite_ScaffoldedDeNovo_contig_1168	114558
SRR036708__contig_15914	NorthernBobwhite_ScaffoldedDeNovo_contig_1168	152766
SRR036708__contig_10114	NorthernBobwhite_ScaffoldedDeNovo_contig_1168	157569
SRR036708__contig_20493	NorthernBobwhite_ScaffoldedDeNovo_contig_1169	67651
SRR036708__contig_12352	NorthernBobwhite_ScaffoldedDeNovo_contig_1169	68277
SRR036708__contig_18269	NorthernBobwhite_ScaffoldedDeNovo_contig_1169	117614
SRR036708__contig_12837	NorthernBobwhite_ScaffoldedDeNovo_contig_1169	129556
SRR036708__contig_14135	NorthernBobwhite_ScaffoldedDeNovo_contig_1174	56016
SRR036708__contig_12988	NorthernBobwhite_ScaffoldedDeNovo_contig_1174	64805
SRR036708__contig_12932	NorthernBobwhite_ScaffoldedDeNovo_contig_1175	5195
SRR036708__contig_21090	NorthernBobwhite_ScaffoldedDeNovo_contig_1176	848
SRR036708__contig_3704	NorthernBobwhite_ScaffoldedDeNovo_contig_1176	1686
SRR036708__contig_7521	NorthernBobwhite_ScaffoldedDeNovo_contig_1176	50151
SRR036708__contig_9637	NorthernBobwhite_ScaffoldedDeNovo_contig_1176	56657
SRR036708__contig_10680	NorthernBobwhite_ScaffoldedDeNovo_contig_1181	30756
SRR036708__contig_10873	NorthernBobwhite_ScaffoldedDeNovo_contig_1185	52330
SRR036708__contig_6099	NorthernBobwhite_ScaffoldedDeNovo_contig_1186	629
SRR036708__contig_13210	NorthernBobwhite_ScaffoldedDeNovo_contig_1186	4694
SRR036708__contig_3662	NorthernBobwhite_ScaffoldedDeNovo_contig_1196	264
SRR036708__contig_3857	NorthernBobwhite_ScaffoldedDeNovo_contig_1196	1572
SRR036708__contig_19245	NorthernBobwhite_ScaffoldedDeNovo_contig_1196	23452
SRR036708__contig_7831	NorthernBobwhite_ScaffoldedDeNovo_contig_1197	571
SRR036708__contig_5609	NorthernBobwhite_ScaffoldedDeNovo_contig_1197	1400
SRR036708__contig_5187	NorthernBobwhite_ScaffoldedDeNovo_contig_1197	1779
SRR036708__contig_4413	NorthernBobwhite_ScaffoldedDeNovo_contig_1197	2249
SRR036708__contig_20409	NorthernBobwhite_ScaffoldedDeNovo_contig_1197	14164
SRR036708__contig_2670	NorthernBobwhite_ScaffoldedDeNovo_contig_1197	45301
SRR036708__contig_5043	NorthernBobwhite_ScaffoldedDeNovo_contig_1197	45728
SRR036708__contig_4845	NorthernBobwhite_ScaffoldedDeNovo_contig_1197	46475
SRR036708__contig_17613	NorthernBobwhite_ScaffoldedDeNovo_contig_1197	46778
SRR036708__contig_20003	NorthernBobwhite_ScaffoldedDeNovo_contig_1197	47500
SRR036708__contig_18908	NorthernBobwhite_ScaffoldedDeNovo_contig_1197	48315
SRR036708__contig_17969	NorthernBobwhite_ScaffoldedDeNovo_contig_1198	80828
SRR036708__contig_7781	NorthernBobwhite_ScaffoldedDeNovo_contig_1200	896
SRR036708__contig_12282	NorthernBobwhite_ScaffoldedDeNovo_contig_1201	20162
SRR036708__contig_13736	NorthernBobwhite_ScaffoldedDeNovo_contig_1201	28470
SRR036708__contig_9610	NorthernBobwhite_ScaffoldedDeNovo_contig_1202	9405
SRR036708__contig_13747	NorthernBobwhite_ScaffoldedDeNovo_contig_1202	31027
SRR036708__contig_4036	NorthernBobwhite_ScaffoldedDeNovo_contig_1202	73651
SRR036708__contig_10616	NorthernBobwhite_ScaffoldedDeNovo_contig_1202	85905
SRR036708__contig_9935	NorthernBobwhite_ScaffoldedDeNovo_contig_1203	11562
SRR036708__contig_19004	NorthernBobwhite_ScaffoldedDeNovo_contig_1203	14877
SRR036708__contig_12455	NorthernBobwhite_ScaffoldedDeNovo_contig_1208	23107
SRR036708__contig_1953	NorthernBobwhite_ScaffoldedDeNovo_contig_1208	82614
SRR036708__contig_10632	NorthernBobwhite_ScaffoldedDeNovo_contig_1212	9432
SRR036708__contig_7647	NorthernBobwhite_ScaffoldedDeNovo_contig_1214	1570
SRR036708__contig_17949	NorthernBobwhite_ScaffoldedDeNovo_contig_1216	129377
SRR036708__contig_18835	NorthernBobwhite_ScaffoldedDeNovo_contig_1218	11630
SRR036708__contig_8193	NorthernBobwhite_ScaffoldedDeNovo_contig_1219	22801
SRR036708__contig_6042	NorthernBobwhite_ScaffoldedDeNovo_contig_1219	98280
SRR036708__contig_8200	NorthernBobwhite_ScaffoldedDeNovo_contig_1225	18299
SRR036708__contig_21093	NorthernBobwhite_ScaffoldedDeNovo_contig_1228	44366
SRR036708__contig_9178	NorthernBobwhite_ScaffoldedDeNovo_contig_1229	10862
SRR036708__contig_16627	NorthernBobwhite_ScaffoldedDeNovo_contig_1229	11982
SRR036708__contig_8118	NorthernBobwhite_ScaffoldedDeNovo_contig_1229	12399
SRR036708__contig_9665	NorthernBobwhite_ScaffoldedDeNovo_contig_1229	13273
SRR036708__contig_12478	NorthernBobwhite_ScaffoldedDeNovo_contig_1230	3163
SRR036708__contig_3883	NorthernBobwhite_ScaffoldedDeNovo_contig_1230	6913
SRR036708__contig_5387	NorthernBobwhite_ScaffoldedDeNovo_contig_1230	8401
SRR036708__contig_6458	NorthernBobwhite_ScaffoldedDeNovo_contig_1230	10757
SRR036708__contig_17964	NorthernBobwhite_ScaffoldedDeNovo_contig_1230	35321
SRR036708__contig_15188	NorthernBobwhite_ScaffoldedDeNovo_contig_1230	38024
SRR036708__contig_10234	NorthernBobwhite_ScaffoldedDeNovo_contig_1230	38348
SRR036708__contig_2863	NorthernBobwhite_ScaffoldedDeNovo_contig_1230	42349
SRR036708__contig_367	NorthernBobwhite_ScaffoldedDeNovo_contig_1230	51229
SRR036708__contig_1846	NorthernBobwhite_ScaffoldedDeNovo_contig_1230	51677
SRR036708__contig_19061	NorthernBobwhite_ScaffoldedDeNovo_contig_1237	26380
SRR036708__contig_3686	NorthernBobwhite_ScaffoldedDeNovo_contig_1237	69139
SRR036708__contig_2145	NorthernBobwhite_ScaffoldedDeNovo_contig_1237	101452
SRR036708__contig_21116	NorthernBobwhite_ScaffoldedDeNovo_contig_1237	102659
SRR036708__contig_17533	NorthernBobwhite_ScaffoldedDeNovo_contig_1237	103386
SRR036708__contig_4140	NorthernBobwhite_ScaffoldedDeNovo_contig_1237	115928
SRR036708__contig_557	NorthernBobwhite_ScaffoldedDeNovo_contig_1237	120671
SRR036708__contig_15327	NorthernBobwhite_ScaffoldedDeNovo_contig_1237	125146
SRR036708__contig_8106	NorthernBobwhite_ScaffoldedDeNovo_contig_1237	163012
SRR036708__contig_11217	NorthernBobwhite_ScaffoldedDeNovo_contig_1237	164926
SRR036708__contig_15	NorthernBobwhite_ScaffoldedDeNovo_contig_1237	166059
SRR036708__contig_13185	NorthernBobwhite_ScaffoldedDeNovo_contig_1237	175759
SRR036708__contig_8904	NorthernBobwhite_ScaffoldedDeNovo_contig_1237	180675
SRR036708__contig_7315	NorthernBobwhite_ScaffoldedDeNovo_contig_1237	187056
SRR036708__contig_5472	NorthernBobwhite_ScaffoldedDeNovo_contig_1237	191709
SRR036708__contig_15269	NorthernBobwhite_ScaffoldedDeNovo_contig_1237	196370
SRR036708__contig_5471	NorthernBobwhite_ScaffoldedDeNovo_contig_1237	196629
SRR036708__contig_2795	NorthernBobwhite_ScaffoldedDeNovo_contig_1237	199025
SRR036708__contig_19910	NorthernBobwhite_ScaffoldedDeNovo_contig_1237	201003
SRR036708__contig_3759	NorthernBobwhite_ScaffoldedDeNovo_contig_1237	205010
SRR036708__contig_5087	NorthernBobwhite_ScaffoldedDeNovo_contig_1237	218314
SRR036708__contig_5521	NorthernBobwhite_ScaffoldedDeNovo_contig_1237	231152
SRR036708__contig_17790	NorthernBobwhite_ScaffoldedDeNovo_contig_1237	241913
SRR036708__contig_9626	NorthernBobwhite_ScaffoldedDeNovo_contig_1237	276010
SRR036708__contig_13128	NorthernBobwhite_ScaffoldedDeNovo_contig_1240	135676
SRR036708__contig_18259	NorthernBobwhite_ScaffoldedDeNovo_contig_1240	137160
SRR036708__contig_19762	NorthernBobwhite_ScaffoldedDeNovo_contig_1251	14830
SRR036708__contig_6236	NorthernBobwhite_ScaffoldedDeNovo_contig_1252	40345
SRR036708__contig_8788	NorthernBobwhite_ScaffoldedDeNovo_contig_1252	41132
SRR036708__contig_2969	NorthernBobwhite_ScaffoldedDeNovo_contig_1252	52361
SRR036708__contig_6344	NorthernBobwhite_ScaffoldedDeNovo_contig_1260	12380
SRR036708__contig_3203	NorthernBobwhite_ScaffoldedDeNovo_contig_1260	24179
SRR036708__contig_14112	NorthernBobwhite_ScaffoldedDeNovo_contig_1260	89900
SRR036708__contig_3032	NorthernBobwhite_ScaffoldedDeNovo_contig_1260	95486
SRR036708__contig_3224	NorthernBobwhite_ScaffoldedDeNovo_contig_1260	117256
SRR036708__contig_7754	NorthernBobwhite_ScaffoldedDeNovo_contig_1260	167581
SRR036708__contig_4111	NorthernBobwhite_ScaffoldedDeNovo_contig_1260	168110
SRR036708__contig_1578	NorthernBobwhite_ScaffoldedDeNovo_contig_1264	23034
SRR036708__contig_7776	NorthernBobwhite_ScaffoldedDeNovo_contig_1264	25631
SRR036708__contig_5090	NorthernBobwhite_ScaffoldedDeNovo_contig_1264	31898
SRR036708__contig_13152	NorthernBobwhite_ScaffoldedDeNovo_contig_1266	141035
SRR036708__contig_20801	NorthernBobwhite_ScaffoldedDeNovo_contig_1266	146307
SRR036708__contig_13856	NorthernBobwhite_ScaffoldedDeNovo_contig_1267	17799
SRR036708__contig_17865	NorthernBobwhite_ScaffoldedDeNovo_contig_1268	39074
SRR036708__contig_16295	NorthernBobwhite_ScaffoldedDeNovo_contig_1268	166409
SRR036708__contig_18853	NorthernBobwhite_ScaffoldedDeNovo_contig_1268	166650
SRR036708__contig_9396	NorthernBobwhite_ScaffoldedDeNovo_contig_1268	169625
SRR036708__contig_1798	NorthernBobwhite_ScaffoldedDeNovo_contig_1268	171725
SRR036708__contig_2051	NorthernBobwhite_ScaffoldedDeNovo_contig_1268	177229
SRR036708__contig_13564	NorthernBobwhite_ScaffoldedDeNovo_contig_1268	186310
SRR036708__contig_13412	NorthernBobwhite_ScaffoldedDeNovo_contig_1268	187419
SRR036708__contig_9490	NorthernBobwhite_ScaffoldedDeNovo_contig_1268	214054
SRR036708__contig_18806	NorthernBobwhite_ScaffoldedDeNovo_contig_1270	25183
SRR036708__contig_6983	NorthernBobwhite_ScaffoldedDeNovo_contig_1270	35994
SRR036708__contig_5876	NorthernBobwhite_ScaffoldedDeNovo_contig_1270	38072
SRR036708__contig_7549	NorthernBobwhite_ScaffoldedDeNovo_contig_1270	77910
SRR036708__contig_13084	NorthernBobwhite_ScaffoldedDeNovo_contig_1270	111243
SRR036708__contig_20551	NorthernBobwhite_ScaffoldedDeNovo_contig_1270	137939
SRR036708__contig_4309	NorthernBobwhite_ScaffoldedDeNovo_contig_1272	7401
SRR036708__contig_5212	NorthernBobwhite_ScaffoldedDeNovo_contig_1272	8513
SRR036708__contig_18867	NorthernBobwhite_ScaffoldedDeNovo_contig_1273	131702
SRR036708__contig_16246	NorthernBobwhite_ScaffoldedDeNovo_contig_1274	45068
SRR036708__contig_13011	NorthernBobwhite_ScaffoldedDeNovo_contig_1276	52376
SRR036708__contig_12863	NorthernBobwhite_ScaffoldedDeNovo_contig_1284	85620
SRR036708__contig_2224	NorthernBobwhite_ScaffoldedDeNovo_contig_1284	96570
SRR036708__contig_4499	NorthernBobwhite_ScaffoldedDeNovo_contig_1284	97437
SRR036708__contig_9549	NorthernBobwhite_ScaffoldedDeNovo_contig_1284	97917
SRR036708__contig_19984	NorthernBobwhite_ScaffoldedDeNovo_contig_1286	6824
SRR036708__contig_700	NorthernBobwhite_ScaffoldedDeNovo_contig_1286	8938
SRR036708__contig_4831	NorthernBobwhite_ScaffoldedDeNovo_contig_1286	11678
SRR036708__contig_6925	NorthernBobwhite_ScaffoldedDeNovo_contig_1286	13879
SRR036708__contig_8369	NorthernBobwhite_ScaffoldedDeNovo_contig_1286	39637
SRR036708__contig_13057	NorthernBobwhite_ScaffoldedDeNovo_contig_1286	40683
SRR036708__contig_15339	NorthernBobwhite_ScaffoldedDeNovo_contig_1286	40945
SRR036708__contig_10079	NorthernBobwhite_ScaffoldedDeNovo_contig_1286	42155
SRR036708__contig_16292	NorthernBobwhite_ScaffoldedDeNovo_contig_1286	43502
SRR036708__contig_8174	NorthernBobwhite_ScaffoldedDeNovo_contig_1288	4091
SRR036708__contig_19526	NorthernBobwhite_ScaffoldedDeNovo_contig_1288	23794
SRR036708__contig_3097	NorthernBobwhite_ScaffoldedDeNovo_contig_1288	24993
SRR036708__contig_3528	NorthernBobwhite_ScaffoldedDeNovo_contig_1289	88849
SRR036708__contig_20981	NorthernBobwhite_ScaffoldedDeNovo_contig_1292	91184
SRR036708__contig_674	NorthernBobwhite_ScaffoldedDeNovo_contig_1292	120040
SRR036708__contig_157	NorthernBobwhite_ScaffoldedDeNovo_contig_1292	120963
SRR036708__contig_20709	NorthernBobwhite_ScaffoldedDeNovo_contig_1292	134376
SRR036708__contig_1092	NorthernBobwhite_ScaffoldedDeNovo_contig_1292	134814
SRR036708__contig_19879	NorthernBobwhite_ScaffoldedDeNovo_contig_1292	143544
SRR036708__contig_19206	NorthernBobwhite_ScaffoldedDeNovo_contig_1292	152386
SRR036708__contig_15418	NorthernBobwhite_ScaffoldedDeNovo_contig_1292	153873
SRR036708__contig_11539	NorthernBobwhite_ScaffoldedDeNovo_contig_1292	163380
SRR036708__contig_7733	NorthernBobwhite_ScaffoldedDeNovo_contig_1300	46409
SRR036708__contig_3222	NorthernBobwhite_ScaffoldedDeNovo_contig_1300	46493
SRR036708__contig_8100	NorthernBobwhite_ScaffoldedDeNovo_contig_1301	37844
SRR036708__contig_5828	NorthernBobwhite_ScaffoldedDeNovo_contig_1301	38387
SRR036708__contig_1687	NorthernBobwhite_ScaffoldedDeNovo_contig_1301	39358
SRR036708__contig_3255	NorthernBobwhite_ScaffoldedDeNovo_contig_1301	40489
SRR036708__contig_4646	NorthernBobwhite_ScaffoldedDeNovo_contig_1301	57012
SRR036708__contig_13516	NorthernBobwhite_ScaffoldedDeNovo_contig_1301	59618
SRR036708__contig_11041	NorthernBobwhite_ScaffoldedDeNovo_contig_1301	69366
SRR036708__contig_15083	NorthernBobwhite_ScaffoldedDeNovo_contig_1301	71704
SRR036708__contig_7686	NorthernBobwhite_ScaffoldedDeNovo_contig_1304	17748
SRR036708__contig_4380	NorthernBobwhite_ScaffoldedDeNovo_contig_1306	42480
SRR036708__contig_13823	NorthernBobwhite_ScaffoldedDeNovo_contig_1309	16121
SRR036708__contig_7148	NorthernBobwhite_ScaffoldedDeNovo_contig_1309	20755
SRR036708__contig_4084	NorthernBobwhite_ScaffoldedDeNovo_contig_1309	21600
SRR036708__contig_8224	NorthernBobwhite_ScaffoldedDeNovo_contig_1309	22793
SRR036708__contig_8429	NorthernBobwhite_ScaffoldedDeNovo_contig_1309	24378
SRR036708__contig_12600	NorthernBobwhite_ScaffoldedDeNovo_contig_1321	66215
SRR036708__contig_13149	NorthernBobwhite_ScaffoldedDeNovo_contig_1321	70486
SRR036708__contig_5911	NorthernBobwhite_ScaffoldedDeNovo_contig_1321	71117
SRR036708__contig_8302	NorthernBobwhite_ScaffoldedDeNovo_contig_1327	354
SRR036708__contig_1230	NorthernBobwhite_ScaffoldedDeNovo_contig_1327	2058
SRR036708__contig_11720	NorthernBobwhite_ScaffoldedDeNovo_contig_1327	4307
SRR036708__contig_725	NorthernBobwhite_ScaffoldedDeNovo_contig_1327	45370
SRR036708__contig_10277	NorthernBobwhite_ScaffoldedDeNovo_contig_1327	47888
SRR036708__contig_16614	NorthernBobwhite_ScaffoldedDeNovo_contig_1328	2252
SRR036708__contig_298	NorthernBobwhite_ScaffoldedDeNovo_contig_1328	3021
SRR036708__contig_16307	NorthernBobwhite_ScaffoldedDeNovo_contig_1328	5070
SRR036708__contig_15045	NorthernBobwhite_ScaffoldedDeNovo_contig_1328	21422
SRR036708__contig_3592	NorthernBobwhite_ScaffoldedDeNovo_contig_1328	23785
SRR036708__contig_4820	NorthernBobwhite_ScaffoldedDeNovo_contig_1328	29353
SRR036708__contig_11246	NorthernBobwhite_ScaffoldedDeNovo_contig_1328	29863
SRR036708__contig_3195	NorthernBobwhite_ScaffoldedDeNovo_contig_1329	6037
SRR036708__contig_1246	NorthernBobwhite_ScaffoldedDeNovo_contig_1329	6576
SRR036708__contig_2903	NorthernBobwhite_ScaffoldedDeNovo_contig_1329	7958
SRR036708__contig_4048	NorthernBobwhite_ScaffoldedDeNovo_contig_1329	15021
SRR036708__contig_1828	NorthernBobwhite_ScaffoldedDeNovo_contig_1329	46196
SRR036708__contig_5976	NorthernBobwhite_ScaffoldedDeNovo_contig_1330	49918
SRR036708__contig_13226	NorthernBobwhite_ScaffoldedDeNovo_contig_1330	66668
SRR036708__contig_9003	NorthernBobwhite_ScaffoldedDeNovo_contig_1330	77373
SRR036708__contig_16636	NorthernBobwhite_ScaffoldedDeNovo_contig_1330	82708
SRR036708__contig_12694	NorthernBobwhite_ScaffoldedDeNovo_contig_1330	83566
SRR036708__contig_17115	NorthernBobwhite_ScaffoldedDeNovo_contig_1330	84254
SRR036708__contig_5448	NorthernBobwhite_ScaffoldedDeNovo_contig_1333	13534
SRR036708__contig_3464	NorthernBobwhite_ScaffoldedDeNovo_contig_1333	13968
SRR036708__contig_18555	NorthernBobwhite_ScaffoldedDeNovo_contig_1333	14788
SRR036708__contig_992	NorthernBobwhite_ScaffoldedDeNovo_contig_1334	11791
SRR036708__contig_2050	NorthernBobwhite_ScaffoldedDeNovo_contig_1334	12525
SRR036708__contig_19966	NorthernBobwhite_ScaffoldedDeNovo_contig_1334	13835
SRR036708__contig_10958	NorthernBobwhite_ScaffoldedDeNovo_contig_1335	29394
SRR036708__contig_1299	NorthernBobwhite_ScaffoldedDeNovo_contig_1345	14274
SRR036708__contig_4721	NorthernBobwhite_ScaffoldedDeNovo_contig_1346	23222
SRR036708__contig_10269	NorthernBobwhite_ScaffoldedDeNovo_contig_1346	33141
SRR036708__contig_11682	NorthernBobwhite_ScaffoldedDeNovo_contig_1346	33610
SRR036708__contig_17349	NorthernBobwhite_ScaffoldedDeNovo_contig_1346	67697
SRR036708__contig_13492	NorthernBobwhite_ScaffoldedDeNovo_contig_1349	412
SRR036708__contig_10742	NorthernBobwhite_ScaffoldedDeNovo_contig_1349	1346
SRR036708__contig_171	NorthernBobwhite_ScaffoldedDeNovo_contig_1349	61430
SRR036708__contig_19019	NorthernBobwhite_ScaffoldedDeNovo_contig_1349	67604
SRR036708__contig_9837	NorthernBobwhite_ScaffoldedDeNovo_contig_1349	69502
SRR036708__contig_19667	NorthernBobwhite_ScaffoldedDeNovo_contig_1349	73712
SRR036708__contig_11220	NorthernBobwhite_ScaffoldedDeNovo_contig_1349	123705
SRR036708__contig_85	NorthernBobwhite_ScaffoldedDeNovo_contig_1349	135847
SRR036708__contig_13083	NorthernBobwhite_ScaffoldedDeNovo_contig_1349	136232
SRR036708__contig_16902	NorthernBobwhite_ScaffoldedDeNovo_contig_1349	217441
SRR036708__contig_17960	NorthernBobwhite_ScaffoldedDeNovo_contig_1350	10081
SRR036708__contig_19153	NorthernBobwhite_ScaffoldedDeNovo_contig_1354	4989
SRR036708__contig_789	NorthernBobwhite_ScaffoldedDeNovo_contig_1354	9842
SRR036708__contig_2075	NorthernBobwhite_ScaffoldedDeNovo_contig_1354	11292
SRR036708__contig_1533	NorthernBobwhite_ScaffoldedDeNovo_contig_1354	12102
SRR036708__contig_10946	NorthernBobwhite_ScaffoldedDeNovo_contig_1354	12335
SRR036708__contig_11139	NorthernBobwhite_ScaffoldedDeNovo_contig_1354	14105
SRR036708__contig_6047	NorthernBobwhite_ScaffoldedDeNovo_contig_1356	84056
SRR036708__contig_10478	NorthernBobwhite_ScaffoldedDeNovo_contig_1357	226371
SRR036708__contig_13389	NorthernBobwhite_ScaffoldedDeNovo_contig_1358	512
SRR036708__contig_5930	NorthernBobwhite_ScaffoldedDeNovo_contig_1359	1071
SRR036708__contig_10503	NorthernBobwhite_ScaffoldedDeNovo_contig_1359	12138
SRR036708__contig_16394	NorthernBobwhite_ScaffoldedDeNovo_contig_1361	13647
SRR036708__contig_82	NorthernBobwhite_ScaffoldedDeNovo_contig_1361	14854
SRR036708__contig_16540	NorthernBobwhite_ScaffoldedDeNovo_contig_1361	18405
SRR036708__contig_1769	NorthernBobwhite_ScaffoldedDeNovo_contig_1361	33607
SRR036708__contig_16452	NorthernBobwhite_ScaffoldedDeNovo_contig_1361	33926
SRR036708__contig_15021	NorthernBobwhite_ScaffoldedDeNovo_contig_1363	47039
SRR036708__contig_18643	NorthernBobwhite_ScaffoldedDeNovo_contig_1363	47535
SRR036708__contig_9446	NorthernBobwhite_ScaffoldedDeNovo_contig_1363	48387
SRR036708__contig_3768	NorthernBobwhite_ScaffoldedDeNovo_contig_1364	46287
SRR036708__contig_19615	NorthernBobwhite_ScaffoldedDeNovo_contig_1370	6135
SRR036708__contig_5959	NorthernBobwhite_ScaffoldedDeNovo_contig_1370	10027
SRR036708__contig_6464	NorthernBobwhite_ScaffoldedDeNovo_contig_1370	20951
SRR036708__contig_14333	NorthernBobwhite_ScaffoldedDeNovo_contig_1370	28079
SRR036708__contig_17831	NorthernBobwhite_ScaffoldedDeNovo_contig_1370	29433
SRR036708__contig_17624	NorthernBobwhite_ScaffoldedDeNovo_contig_1372	15387
SRR036708__contig_2948	NorthernBobwhite_ScaffoldedDeNovo_contig_1374	11601
SRR036708__contig_15272	NorthernBobwhite_ScaffoldedDeNovo_contig_1374	27434
SRR036708__contig_8697	NorthernBobwhite_ScaffoldedDeNovo_contig_1374	47341
SRR036708__contig_20030	NorthernBobwhite_ScaffoldedDeNovo_contig_1374	72406
SRR036708__contig_16079	NorthernBobwhite_ScaffoldedDeNovo_contig_1375	763
SRR036708__contig_10625	NorthernBobwhite_ScaffoldedDeNovo_contig_1375	23984
SRR036708__contig_11583	NorthernBobwhite_ScaffoldedDeNovo_contig_1376	133798
SRR036708__contig_14756	NorthernBobwhite_ScaffoldedDeNovo_contig_1376	134396
SRR036708__contig_20293	NorthernBobwhite_ScaffoldedDeNovo_contig_1376	135781
SRR036708__contig_14796	NorthernBobwhite_ScaffoldedDeNovo_contig_1376	138838
SRR036708__contig_8081	NorthernBobwhite_ScaffoldedDeNovo_contig_1376	139541
SRR036708__contig_11413	NorthernBobwhite_ScaffoldedDeNovo_contig_1378	35211
SRR036708__contig_11545	NorthernBobwhite_ScaffoldedDeNovo_contig_1379	16702
SRR036708__contig_13484	NorthernBobwhite_ScaffoldedDeNovo_contig_1380	123418
SRR036708__contig_6150	NorthernBobwhite_ScaffoldedDeNovo_contig_1380	124246
SRR036708__contig_9668	NorthernBobwhite_ScaffoldedDeNovo_contig_1380	126689
SRR036708__contig_17703	NorthernBobwhite_ScaffoldedDeNovo_contig_1380	127005
SRR036708__contig_18935	NorthernBobwhite_ScaffoldedDeNovo_contig_1380	127829
SRR036708__contig_13742	NorthernBobwhite_ScaffoldedDeNovo_contig_1380	159510
SRR036708__contig_7583	NorthernBobwhite_ScaffoldedDeNovo_contig_1380	160906
SRR036708__contig_16369	NorthernBobwhite_ScaffoldedDeNovo_contig_1380	161567
SRR036708__contig_13803	NorthernBobwhite_ScaffoldedDeNovo_contig_1380	165229
SRR036708__contig_6144	NorthernBobwhite_ScaffoldedDeNovo_contig_1380	166446
SRR036708__contig_6546	NorthernBobwhite_ScaffoldedDeNovo_contig_1380	174592
SRR036708__contig_15607	NorthernBobwhite_ScaffoldedDeNovo_contig_1380	178605
SRR036708__contig_10247	NorthernBobwhite_ScaffoldedDeNovo_contig_1380	182392
SRR036708__contig_5299	NorthernBobwhite_ScaffoldedDeNovo_contig_1380	294010
SRR036708__contig_17372	NorthernBobwhite_ScaffoldedDeNovo_contig_1380	304691
SRR036708__contig_19454	NorthernBobwhite_ScaffoldedDeNovo_contig_1380	413731
SRR036708__contig_12864	NorthernBobwhite_ScaffoldedDeNovo_contig_1381	2668
SRR036708__contig_11825	NorthernBobwhite_ScaffoldedDeNovo_contig_1382	95754
SRR036708__contig_13729	NorthernBobwhite_ScaffoldedDeNovo_contig_1382	98822
SRR036708__contig_14410	NorthernBobwhite_ScaffoldedDeNovo_contig_1388	21819
SRR036708__contig_14592	NorthernBobwhite_ScaffoldedDeNovo_contig_1388	22841
SRR036708__contig_5317	NorthernBobwhite_ScaffoldedDeNovo_contig_1388	98198
SRR036708__contig_16513	NorthernBobwhite_ScaffoldedDeNovo_contig_1389	99113
SRR036708__contig_20561	NorthernBobwhite_ScaffoldedDeNovo_contig_1389	101762
SRR036708__contig_10525	NorthernBobwhite_ScaffoldedDeNovo_contig_1391	2398
SRR036708__contig_2190	NorthernBobwhite_ScaffoldedDeNovo_contig_1392	2915
SRR036708__contig_14591	NorthernBobwhite_ScaffoldedDeNovo_contig_1393	88911
SRR036708__contig_5186	NorthernBobwhite_ScaffoldedDeNovo_contig_1393	89264
SRR036708__contig_8218	NorthernBobwhite_ScaffoldedDeNovo_contig_1393	91120
SRR036708__contig_17577	NorthernBobwhite_ScaffoldedDeNovo_contig_1393	93302
SRR036708__contig_14368	NorthernBobwhite_ScaffoldedDeNovo_contig_1393	99657
SRR036708__contig_15691	NorthernBobwhite_ScaffoldedDeNovo_contig_1393	103681
SRR036708__contig_11454	NorthernBobwhite_ScaffoldedDeNovo_contig_1399	79922
SRR036708__contig_11864	NorthernBobwhite_ScaffoldedDeNovo_contig_1399	80235
SRR036708__contig_11995	NorthernBobwhite_ScaffoldedDeNovo_contig_1399	80648
SRR036708__contig_9350	NorthernBobwhite_ScaffoldedDeNovo_contig_1399	123328
SRR036708__contig_4206	NorthernBobwhite_ScaffoldedDeNovo_contig_1399	127783
SRR036708__contig_14218	NorthernBobwhite_ScaffoldedDeNovo_contig_1399	138169
SRR036708__contig_18560	NorthernBobwhite_ScaffoldedDeNovo_contig_1399	142617
SRR036708__contig_5439	NorthernBobwhite_ScaffoldedDeNovo_contig_1399	143054
SRR036708__contig_10051	NorthernBobwhite_ScaffoldedDeNovo_contig_1399	165132
SRR036708__contig_1010	NorthernBobwhite_ScaffoldedDeNovo_contig_1399	166125
SRR036708__contig_18064	NorthernBobwhite_ScaffoldedDeNovo_contig_1399	167410
SRR036708__contig_7922	NorthernBobwhite_ScaffoldedDeNovo_contig_1399	167870
SRR036708__contig_20427	NorthernBobwhite_ScaffoldedDeNovo_contig_1402	1762
SRR036708__contig_1493	NorthernBobwhite_ScaffoldedDeNovo_contig_1402	22682
SRR036708__contig_19564	NorthernBobwhite_ScaffoldedDeNovo_contig_1402	33454
SRR036708__contig_18736	NorthernBobwhite_ScaffoldedDeNovo_contig_1411	58455
SRR036708__contig_16035	NorthernBobwhite_ScaffoldedDeNovo_contig_1411	75928
SRR036708__contig_21183	NorthernBobwhite_ScaffoldedDeNovo_contig_1412	367
SRR036708__contig_17859	NorthernBobwhite_ScaffoldedDeNovo_contig_1412	32069
SRR036708__contig_2055	NorthernBobwhite_ScaffoldedDeNovo_contig_1412	34844
SRR036708__contig_10066	NorthernBobwhite_ScaffoldedDeNovo_contig_1413	9684
SRR036708__contig_15498	NorthernBobwhite_ScaffoldedDeNovo_contig_1413	10608
SRR036708__contig_8353	NorthernBobwhite_ScaffoldedDeNovo_contig_1425	20173
SRR036708__contig_3089	NorthernBobwhite_ScaffoldedDeNovo_contig_1426	40683
SRR036708__contig_4603	NorthernBobwhite_ScaffoldedDeNovo_contig_1426	41633
SRR036708__contig_1105	NorthernBobwhite_ScaffoldedDeNovo_contig_1426	51186
SRR036708__contig_15933	NorthernBobwhite_ScaffoldedDeNovo_contig_1426	51574
SRR036708__contig_4975	NorthernBobwhite_ScaffoldedDeNovo_contig_1426	51885
SRR036708__contig_17580	NorthernBobwhite_ScaffoldedDeNovo_contig_1427	21515
SRR036708__contig_3546	NorthernBobwhite_ScaffoldedDeNovo_contig_1427	29016
SRR036708__contig_1854	NorthernBobwhite_ScaffoldedDeNovo_contig_1430	579
SRR036708__contig_7001	NorthernBobwhite_ScaffoldedDeNovo_contig_1430	1153
SRR036708__contig_3448	NorthernBobwhite_ScaffoldedDeNovo_contig_1430	3003
SRR036708__contig_9752	NorthernBobwhite_ScaffoldedDeNovo_contig_1434	20
SRR036708__contig_5342	NorthernBobwhite_ScaffoldedDeNovo_contig_1434	854
SRR036708__contig_18296	NorthernBobwhite_ScaffoldedDeNovo_contig_1434	41659
SRR036708__contig_9968	NorthernBobwhite_ScaffoldedDeNovo_contig_1434	42117
SRR036708__contig_21112	NorthernBobwhite_ScaffoldedDeNovo_contig_1439	25740
SRR036708__contig_1738	NorthernBobwhite_ScaffoldedDeNovo_contig_1439	34778
SRR036708__contig_2908	NorthernBobwhite_ScaffoldedDeNovo_contig_1439	65412
SRR036708__contig_8025	NorthernBobwhite_ScaffoldedDeNovo_contig_1439	204873
SRR036708__contig_17848	NorthernBobwhite_ScaffoldedDeNovo_contig_1439	215154
SRR036708__contig_4177	NorthernBobwhite_ScaffoldedDeNovo_contig_1439	261698
SRR036708__contig_15708	NorthernBobwhite_ScaffoldedDeNovo_contig_1439	266801
SRR036708__contig_10545	NorthernBobwhite_ScaffoldedDeNovo_contig_1439	267432
SRR036708__contig_12129	NorthernBobwhite_ScaffoldedDeNovo_contig_1439	270786
SRR036708__contig_3529	NorthernBobwhite_ScaffoldedDeNovo_contig_1446	49492
SRR036708__contig_3868	NorthernBobwhite_ScaffoldedDeNovo_contig_1446	50072
SRR036708__contig_19477	NorthernBobwhite_ScaffoldedDeNovo_contig_1446	50662
SRR036708__contig_13030	NorthernBobwhite_ScaffoldedDeNovo_contig_1447	36160
SRR036708__contig_5080	NorthernBobwhite_ScaffoldedDeNovo_contig_1447	67865
SRR036708__contig_19272	NorthernBobwhite_ScaffoldedDeNovo_contig_1448	146614
SRR036708__contig_2805	NorthernBobwhite_ScaffoldedDeNovo_contig_1454	21074
SRR036708__contig_6183	NorthernBobwhite_ScaffoldedDeNovo_contig_1454	21330
SRR036708__contig_9241	NorthernBobwhite_ScaffoldedDeNovo_contig_1454	21968
SRR036708__contig_18510	NorthernBobwhite_ScaffoldedDeNovo_contig_1454	23169
SRR036708__contig_3956	NorthernBobwhite_ScaffoldedDeNovo_contig_1454	46576
SRR036708__contig_14847	NorthernBobwhite_ScaffoldedDeNovo_contig_1454	62151
SRR036708__contig_19443	NorthernBobwhite_ScaffoldedDeNovo_contig_1454	68764
SRR036708__contig_13164	NorthernBobwhite_ScaffoldedDeNovo_contig_1456	4980
SRR036708__contig_20647	NorthernBobwhite_ScaffoldedDeNovo_contig_1456	7063
SRR036708__contig_4515	NorthernBobwhite_ScaffoldedDeNovo_contig_1468	1
SRR036708__contig_5676	NorthernBobwhite_ScaffoldedDeNovo_contig_1468	317
SRR036708__contig_21363	NorthernBobwhite_ScaffoldedDeNovo_contig_1468	320
SRR036708__contig_5675	NorthernBobwhite_ScaffoldedDeNovo_contig_1468	335
SRR036708__contig_11278	NorthernBobwhite_ScaffoldedDeNovo_contig_1468	373
SRR036708__contig_9211	NorthernBobwhite_ScaffoldedDeNovo_contig_1471	41329
SRR036708__contig_19999	NorthernBobwhite_ScaffoldedDeNovo_contig_1471	41649
SRR036708__contig_7279	NorthernBobwhite_ScaffoldedDeNovo_contig_1471	69815
SRR036708__contig_14363	NorthernBobwhite_ScaffoldedDeNovo_contig_1471	72081
SRR036708__contig_14306	NorthernBobwhite_ScaffoldedDeNovo_contig_1471	79572
SRR036708__contig_3717	NorthernBobwhite_ScaffoldedDeNovo_contig_1471	83396
SRR036708__contig_4816	NorthernBobwhite_ScaffoldedDeNovo_contig_1471	85195
SRR036708__contig_6624	NorthernBobwhite_ScaffoldedDeNovo_contig_1471	86361
SRR036708__contig_16423	NorthernBobwhite_ScaffoldedDeNovo_contig_1475	15885
SRR036708__contig_19412	NorthernBobwhite_ScaffoldedDeNovo_contig_1475	46565
SRR036708__contig_13089	NorthernBobwhite_ScaffoldedDeNovo_contig_1475	49993
SRR036708__contig_2661	NorthernBobwhite_ScaffoldedDeNovo_contig_1475	51677
SRR036708__contig_21169	NorthernBobwhite_ScaffoldedDeNovo_contig_1475	54765
SRR036708__contig_9875	NorthernBobwhite_ScaffoldedDeNovo_contig_1475	55202
SRR036708__contig_2363	NorthernBobwhite_ScaffoldedDeNovo_contig_1475	60292
SRR036708__contig_6202	NorthernBobwhite_ScaffoldedDeNovo_contig_1475	61147
SRR036708__contig_5625	NorthernBobwhite_ScaffoldedDeNovo_contig_1475	64119
SRR036708__contig_10659	NorthernBobwhite_ScaffoldedDeNovo_contig_1475	67202
SRR036708__contig_18054	NorthernBobwhite_ScaffoldedDeNovo_contig_1475	68222
SRR036708__contig_2666	NorthernBobwhite_ScaffoldedDeNovo_contig_1475	90580
SRR036708__contig_12638	NorthernBobwhite_ScaffoldedDeNovo_contig_1475	94649
SRR036708__contig_6377	NorthernBobwhite_ScaffoldedDeNovo_contig_1475	104923
SRR036708__contig_7708	NorthernBobwhite_ScaffoldedDeNovo_contig_1476	5115
SRR036708__contig_9387	NorthernBobwhite_ScaffoldedDeNovo_contig_1477	38043
SRR036708__contig_11463	NorthernBobwhite_ScaffoldedDeNovo_contig_1478	196
SRR036708__contig_4399	NorthernBobwhite_ScaffoldedDeNovo_contig_1478	1108
SRR036708__contig_846	NorthernBobwhite_ScaffoldedDeNovo_contig_1478	10260
SRR036708__contig_4703	NorthernBobwhite_ScaffoldedDeNovo_contig_1478	11266
SRR036708__contig_7953	NorthernBobwhite_ScaffoldedDeNovo_contig_1478	12742
SRR036708__contig_2547	NorthernBobwhite_ScaffoldedDeNovo_contig_1482	18288
SRR036708__contig_9463	NorthernBobwhite_ScaffoldedDeNovo_contig_1483	9301
SRR036708__contig_16936	NorthernBobwhite_ScaffoldedDeNovo_contig_1483	11127
SRR036708__contig_17235	NorthernBobwhite_ScaffoldedDeNovo_contig_1483	20378
SRR036708__contig_20650	NorthernBobwhite_ScaffoldedDeNovo_contig_1483	27810
SRR036708__contig_7414	NorthernBobwhite_ScaffoldedDeNovo_contig_1483	28806
SRR036708__contig_6661	NorthernBobwhite_ScaffoldedDeNovo_contig_1483	39442
SRR036708__contig_15323	NorthernBobwhite_ScaffoldedDeNovo_contig_1483	42257
SRR036708__contig_19128	NorthernBobwhite_ScaffoldedDeNovo_contig_1484	534
SRR036708__contig_12163	NorthernBobwhite_ScaffoldedDeNovo_contig_1484	1693
SRR036708__contig_17267	NorthernBobwhite_ScaffoldedDeNovo_contig_1484	16140
SRR036708__contig_3185	NorthernBobwhite_ScaffoldedDeNovo_contig_1484	16437
SRR036708__contig_4613	NorthernBobwhite_ScaffoldedDeNovo_contig_1484	17589
SRR036708__contig_10562	NorthernBobwhite_ScaffoldedDeNovo_contig_1484	18040
SRR036708__contig_5771	NorthernBobwhite_ScaffoldedDeNovo_contig_1484	18608
SRR036708__contig_20114	NorthernBobwhite_ScaffoldedDeNovo_contig_1487	35788
SRR036708__contig_5586	NorthernBobwhite_ScaffoldedDeNovo_contig_1491	23806
SRR036708__contig_14144	NorthernBobwhite_ScaffoldedDeNovo_contig_1495	28497
SRR036708__contig_19420	NorthernBobwhite_ScaffoldedDeNovo_contig_1499	5901
SRR036708__contig_17143	NorthernBobwhite_ScaffoldedDeNovo_contig_1499	6171
SRR036708__contig_15781	NorthernBobwhite_ScaffoldedDeNovo_contig_1499	6916
SRR036708__contig_7456	NorthernBobwhite_ScaffoldedDeNovo_contig_1499	7968
SRR036708__contig_8060	NorthernBobwhite_ScaffoldedDeNovo_contig_1499	8670
SRR036708__contig_5656	NorthernBobwhite_ScaffoldedDeNovo_contig_1500	26370
SRR036708__contig_13531	NorthernBobwhite_ScaffoldedDeNovo_contig_1500	33951
SRR036708__contig_19394	NorthernBobwhite_ScaffoldedDeNovo_contig_1500	34614
SRR036708__contig_15500	NorthernBobwhite_ScaffoldedDeNovo_contig_1502	76615
SRR036708__contig_21278	NorthernBobwhite_ScaffoldedDeNovo_contig_1502	91570
SRR036708__contig_6010	NorthernBobwhite_ScaffoldedDeNovo_contig_1505	28018
SRR036708__contig_3316	NorthernBobwhite_ScaffoldedDeNovo_contig_1505	47799
SRR036708__contig_6328	NorthernBobwhite_ScaffoldedDeNovo_contig_1505	53173
SRR036708__contig_4676	NorthernBobwhite_ScaffoldedDeNovo_contig_1505	59458
SRR036708__contig_17672	NorthernBobwhite_ScaffoldedDeNovo_contig_1505	221910
SRR036708__contig_1114	NorthernBobwhite_ScaffoldedDeNovo_contig_1511	57249
SRR036708__contig_14430	NorthernBobwhite_ScaffoldedDeNovo_contig_1511	62311
SRR036708__contig_9354	NorthernBobwhite_ScaffoldedDeNovo_contig_1516	353
SRR036708__contig_20960	NorthernBobwhite_ScaffoldedDeNovo_contig_1522	811
SRR036708__contig_2254	NorthernBobwhite_ScaffoldedDeNovo_contig_1524	1092
SRR036708__contig_20004	NorthernBobwhite_ScaffoldedDeNovo_contig_1526	9719
SRR036708__contig_19496	NorthernBobwhite_ScaffoldedDeNovo_contig_1528	22343
SRR036708__contig_5399	NorthernBobwhite_ScaffoldedDeNovo_contig_1528	38116
SRR036708__contig_7167	NorthernBobwhite_ScaffoldedDeNovo_contig_1528	40722
SRR036708__contig_11045	NorthernBobwhite_ScaffoldedDeNovo_contig_1528	46554
SRR036708__contig_2916	NorthernBobwhite_ScaffoldedDeNovo_contig_1528	48500
SRR036708__contig_206	NorthernBobwhite_ScaffoldedDeNovo_contig_1534	12190
SRR036708__contig_7353	NorthernBobwhite_ScaffoldedDeNovo_contig_1539	11364
SRR036708__contig_11255	NorthernBobwhite_ScaffoldedDeNovo_contig_1539	25733
SRR036708__contig_20064	NorthernBobwhite_ScaffoldedDeNovo_contig_1540	75552
SRR036708__contig_309	NorthernBobwhite_ScaffoldedDeNovo_contig_1541	31803
SRR036708__contig_4522	NorthernBobwhite_ScaffoldedDeNovo_contig_1541	51859
SRR036708__contig_19796	NorthernBobwhite_ScaffoldedDeNovo_contig_1543	49
SRR036708__contig_6707	NorthernBobwhite_ScaffoldedDeNovo_contig_1544	57502
SRR036708__contig_1231	NorthernBobwhite_ScaffoldedDeNovo_contig_1547	194581
SRR036708__contig_18451	NorthernBobwhite_ScaffoldedDeNovo_contig_1550	2742
SRR036708__contig_17994	NorthernBobwhite_ScaffoldedDeNovo_contig_1550	13584
SRR036708__contig_21037	NorthernBobwhite_ScaffoldedDeNovo_contig_1550	21410
SRR036708__contig_17223	NorthernBobwhite_ScaffoldedDeNovo_contig_1550	49287
SRR036708__contig_18162	NorthernBobwhite_ScaffoldedDeNovo_contig_1553	7126
SRR036708__contig_1614	NorthernBobwhite_ScaffoldedDeNovo_contig_1553	13045
SRR036708__contig_14073	NorthernBobwhite_ScaffoldedDeNovo_contig_1553	13842
SRR036708__contig_13369	NorthernBobwhite_ScaffoldedDeNovo_contig_1553	24311
SRR036708__contig_18790	NorthernBobwhite_ScaffoldedDeNovo_contig_1553	24853
SRR036708__contig_8565	NorthernBobwhite_ScaffoldedDeNovo_contig_1556	5753
SRR036708__contig_15907	NorthernBobwhite_ScaffoldedDeNovo_contig_1556	6620
SRR036708__contig_4289	NorthernBobwhite_ScaffoldedDeNovo_contig_1565	3048
SRR036708__contig_741	NorthernBobwhite_ScaffoldedDeNovo_contig_1565	3944
SRR036708__contig_10985	NorthernBobwhite_ScaffoldedDeNovo_contig_1565	5671
SRR036708__contig_20589	NorthernBobwhite_ScaffoldedDeNovo_contig_1565	7932
SRR036708__contig_2280	NorthernBobwhite_ScaffoldedDeNovo_contig_1566	247
SRR036708__contig_386	NorthernBobwhite_ScaffoldedDeNovo_contig_1566	11784
SRR036708__contig_3465	NorthernBobwhite_ScaffoldedDeNovo_contig_1566	12892
SRR036708__contig_1770	NorthernBobwhite_ScaffoldedDeNovo_contig_1569	22643
SRR036708__contig_7228	NorthernBobwhite_ScaffoldedDeNovo_contig_1569	24587
SRR036708__contig_8552	NorthernBobwhite_ScaffoldedDeNovo_contig_1569	25297
SRR036708__contig_10620	NorthernBobwhite_ScaffoldedDeNovo_contig_1571	3806
SRR036708__contig_13052	NorthernBobwhite_ScaffoldedDeNovo_contig_1571	6968
SRR036708__contig_6572	NorthernBobwhite_ScaffoldedDeNovo_contig_1571	9158
SRR036708__contig_20115	NorthernBobwhite_ScaffoldedDeNovo_contig_1571	10154
SRR036708__contig_1922	NorthernBobwhite_ScaffoldedDeNovo_contig_1578	3239
SRR036708__contig_15139	NorthernBobwhite_ScaffoldedDeNovo_contig_1579	130242
SRR036708__contig_12168	NorthernBobwhite_ScaffoldedDeNovo_contig_1580	26677
[truncated: 19,004 more rows]
