# Supplementary material for: A Draft De Novo Genome Assembly for the Northern Bobwhite (Colinus virginianus) Reveals Evidence for a Rapid Decline in Effective Population Size Beginning in the Late Pleistocene
Source: PLoS One. 2014 Mar 12;9(3):e90240. doi: 10.1371/journal.pone.0090240 (PMC3951200; doi:10.1371/journal.pone.0090240)
Supplement: Table S12 — NB1.0 QC Analysis on Conserved Outliers Using Additional (Appended) Non-overlapping Blastn data (Chicken S12a, Zebra Finch S12b) To Recalculate the Composite Variable. (XLSX) [file pone.0090240.s012.xlsx]

## Sheet: Gallus_gallus4.0
Table S12-A: NB1.0 QC Analysis on Conserved Outliers Using Additional (Appended) Non-overlapping Blastn data (G. gallus 4.0) To Recalculate the Composite Variable													Legend	Definition/Descriptions
Query 1	Hit/Subject Chromosome	%ID	AlignLength	Mismatches	Gaps	q-start	q-end	hit-start	hit-end	evalue	bitscore		NewCorrectedForAL	New QC calculation for the composite variable based on the summation of hits across the majority of the contig's length
NorthernBobwhiteSimpleDeNovoContig_42497	ref|NW_003763910.1	85.55	38967	4123	1506	631	38720	663282	624945	0	44869		TopEvalCorrectedForAL	Original value of the composite variable constructed for alignment data corresponding to only the Top Evalue Hit
NorthernBobwhiteSimpleDeNovoContig_42497	ref|NW_003763910.1|	80.24	248	30	19	93	355	663510	663277	2e-55	226		Notes	Achieving a smaller value for the new composite variable only validates the original outlier status (i.e., exacerbates the outlier status even further)
NorthernBobwhiteSimpleDeNovoContig_42497	ref|NW_003763910.1|	77.32	269	58	3	365	631	46589	43319	3e-47	199
Sum Matches bp		Sum AlignLength-->	39484
33336.3		NewCorrectedForAL	2.16442e-05
198.995		TopEvalCorrectedForAL	2.19545e-05
207.991		Contig Size	38853
33743.3
33743	rounded
Query 2	Hit/Subject Chromosome	%ID	AlignLength	Mismatches	Gaps	q-start	q-end	hit-start	hit-end	evalue	bitscore
NorthernBobwhiteSimpleDeNovoContig_1920	ref|NW_003763868.1|	85.62	33809	3481	1382	1	32818	1248165	1214748	0	38981
Sum Matches bp		Sum AlignLength-->	33809
28947.3		NewCorrectedForAL	NA
28947	rounded	TopEvalCorrectedForAL	2.53246e-05
		Contig Size	32818
Query 3	Hit/Subject Chromosome	%ID	AlignLength	Mismatches	Gaps	q-start	q-end	hit-start	hit-end	evalue	bitscore
NorthernBobwhiteSimpleDeNovoContig_28277	ref|NW_001488830.2|	84.7	33278	3647	1443	1	32389	4543184	4510461	0	37055
NorthernBobwhiteSimpleDeNovoContig_28277	ref|NW_001488830.2|	85.24	16716	1910	558	32499	48856	4510454	4493939	0	18891
NorthernBobwhiteSimpleDeNovoContig_28277	ref|NW_001488830.2|	83.62	2155	253	100	48845	50918	4493480	4491345	0	2259
Sum Matches bp		Sum AlignLength-->	52149
28186.5		NewCorrectedForAL	1.62665e-05
14248.7		TopEvalCorrectedForAL	2.54523e-05
1802.01		Contig Size	50921
44237.2
44237	rounded
Query 4	Hit/Subject Chromosome	%ID	AlignLength	Mismatches	Gaps	q-start	q-end	hit-start	hit-end	evalue	bitscore
NorthernBobwhiteSimpleDeNovoContig_18853	ref|NW_001488830.2|	87.85	31616	2928	914	43	31183	2059109	2027933	0	39482
NorthernBobwhiteSimpleDeNovoContig_18853	ref|NW_001488830.2|	81.34	938	111	64	31420	32327	2027909	2027066	0	906
Sum Matches bp		Sum AlignLength-->	32554
27774.7		NewCorrectedForAL	2.69287e-05
762.969		TopEvalCorrectedForAL	2.77866e-05
28537.6		Contig Size	32328
28538	rounded
Query 5	Hit/Subject Chromosome	%ID	AlignLength	Mismatches	Gaps	q-start	q-end	hit-start	hit-end	evalue	bitscore
NorthernBobwhiteSimpleDeNovoContig_35615	ref|NW_001488830.2|	84.1	29263	3384	1268	16625	45151	3104096	3075366	0	31897
NorthernBobwhiteSimpleDeNovoContig_35615	ref|NW_001488830.2|	85.23	16905	1973	524	1	16629	3121431	3104775	0	19207
Sum Matches bp		Sum AlignLength-->	46168
24610.2		NewCorrectedForAL	1.83056e-05
14408.1		TopEvalCorrectedForAL	2.87394e-05
39018.3		Contig Size	45152
39018	rounded
Query 6	Hit/Subject Chromosome	%ID	AlignLength	Mismatches	Gaps	q-start	q-end	hit-start	hit-end	evalue	bitscore
NorthernBobwhiteSimpleDeNovoContig_13242	ref|NW_001488830.2|	87.52	29699	2917	790	15	29183	4179256	4208694	0	36699
Sum Matches bp		Sum AlignLength-->	29699
25992.6		NewCorrectedForAL	NA
25993	rounded	TopEvalCorrectedForAL	2.9469e-05
		Contig Size	29183
Query 7	Hit/Subject Chromosome	%ID	AlignLength	Mismatches	Gaps	q-start	q-end	hit-start	hit-end	evalue	bitscore
NorthernBobwhiteSimpleDeNovoContig_17476	ref|NW_001471685.2|	88.56	29486	2516	856	2852	31802	21121602	21092438	0	37816
NorthernBobwhiteSimpleDeNovoContig_17476	ref|NW_001471685.2|	84.94	2237	220	117	2	2204	21123750	21121597	0	2535
NorthernBobwhiteSimpleDeNovoContig_17476	ref|NW_001471685.2|	76.11	699	142	25	2202	2887	3944488	3943802	0
Sum Matches bp		Sum AlignLength-->	32422
26112.8		NewCorrectedForAL	2.7155e-05
1900.11		TopEvalCorrectedForAL	3.00346e-05
532.009		Contig Size	31804
28544.9
28545	rounded
Query 8	Hit/Subject Chromosome	%ID	AlignLength	Mismatches	Gaps	q-start	q-end	hit-start	hit-end	evalue	bitscore
NorthernBobwhiteSimpleDeNovoContig_66729	ref|NW_003764316.1|	85.1	27754	2991	1145	22	27104	488235	515514	0	32396
NorthernBobwhiteSimpleDeNovoContig_66729	ref|NW_003764316.1|	81.68	2063	282	96	27109	29099	516008	518046	0	1986
Sum Matches bp		Sum AlignLength-->	29817
23618.7		NewCorrectedForAL	2.84617e-05
1685.06		TopEvalCorrectedForAL	3.06622e-05
25303.7		Contig Size	29099
25304	rounded
Query 9	Hit/Subject Chromosome	%ID	AlignLength	Mismatches	Gaps	q-start	q-end	hit-start	hit-end	evalue	bitscore
NorthernBobwhiteSimpleDeNovoContig_37232	ref|NW_003763668.1|	85.18	27561	2896	1189	1	26790	3507041	3534183	0	31105
NorthernBobwhiteSimpleDeNovoContig_37232	ref|NW_003763668.1|	86.39	169	23	0	26785	26953	3534745	3534913	6e-48	201
Sum Matches bp		Sum AlignLength-->	27730
23476.5		NewCorrectedForAL	3.07197e-05
145.999		TopEvalCorrectedForAL	3.0906e-05
23622.5		Contig Size	26983
23622	rounded
Query 10	Hit/Subject Chromosome	%ID	AlignLength	Mismatches	Gaps	q-start	q-end	hit-start	hit-end	evalue	bitscore
NorthernBobwhiteSimpleDeNovoContig_2112	ref|NW_003764072.1|	88.38	28467	2455	854	6039	33934	2864459	2836276	0	36247
NorthernBobwhiteSimpleDeNovoContig_2112	ref|NW_003764072.1|	85.56	3794	390	158	2171	5887	2868171	2864459	0	4361
NorthernBobwhiteSimpleDeNovoContig_2112	ref|NW_003764072.1|	90.18	2107	143	64	1	2065	2870274	2868190	0	2848
Sum Matches bp		Sum AlignLength-->	34368
25159.1		NewCorrectedForAL	2.5657e-05
3246.15		TopEvalCorrectedForAL	3.10465e-05
1900.09		Contig Size	33934
30305.4
30305	rounded
Query 11	Hit/Subject Chromosome	%ID	AlignLength	Mismatches	Gaps	q-start	q-end	hit-start	hit-end	evalue	bitscore
NorthernBobwhiteSimpleDeNovoContig_78581	ref|NW_003763788.1|	90	28709	2034	697	3	28176	31954	60500	0	39336
Sum Matches bp		Sum AlignLength-->	28709
25838.1		NewCorrectedForAL	NA
25838	rounded	TopEvalCorrectedForAL	3.13491e-05
		Contig Size	28189
Query 12	Hit/Subject Chromosome	%ID	AlignLength	Mismatches	Gaps	q-start	q-end	hit-start	hit-end	evalue	bitscore
NorthernBobwhiteSimpleDeNovoContig_17775	ref|NW_003764128.1|	88.11	27306	2391	857	1	26826	6313931	6287003	0	38354
Sum Matches bp		Sum AlignLength-->	27306
24059.3		NewCorrectedForAL	NA
24059	rounded	TopEvalCorrectedForAL	3.22676e-05
		Contig Size	26826
Query 13	Hit/Subject Chromosome	%ID	AlignLength	Mismatches	Gaps	q-start	q-end	hit-start	hit-end	evalue	bitscore
NorthernBobwhiteSimpleDeNovoContig_27080	ref|NW_003763686.1|	91.01	28053	1901	620	1	27655	2937316	295146	0	39206
Sum Matches bp		Sum AlignLength-->	28053
25531		NewCorrectedForAL	NA
25531	rounded	TopEvalCorrectedForAL	3.24422e-05
		Contig Size	27656
Query 14	Hit/Subject Chromosome	%ID	AlignLength	Mismatches	Gaps	q-start	q-end	hit-start	hit-end	evalue	bitscore
NorthernBobwhiteSimpleDeNovoContig_30465	ref|NW_003763868.1|	84.14	25913	2932	1177	7909	33158	1689588	171498	0	28173
NorthernBobwhiteSimpleDeNovoContig_30465	ref|NW_003763868.1|	85.96	4166	433	152	36984	41065	1718410	1722507	0	4810
NorthernBobwhiteSimpleDeNovoContig_30465	ref|NW_003763868.1|	83.21	3491	378	208	33241	36593	1714994	1718414	0	3653
NorthernBobwhiteSimpleDeNovoContig_30465	ref|NW_003763868.1|	85.32	3168	366	99	127	3240	1678727	1681849	0	3589
NorthernBobwhiteSimpleDeNovoContig_30465	ref|NW_003763868.1|	80.27	2848	349	213	41120	43850	1722503	1725254	0	2596
NorthernBobwhiteSimpleDeNovoContig_30465	ref|NW_003763868.1|	82.61	1248	166	51	4818	6025	1686074	1687310	0	1251
NorthernBobwhiteSimpleDeNovoContig_30465	ref|NW_003763868.1|	77.14	1194	160	113	6763	7904	1688278	1689410	0	935
NorthernBobwhiteSimpleDeNovoContig_30465	ref|NW_003763868.1|	81.64	512	71	23	3706	1684642	4204	1685143	1e-134	489
Sum Matches bp		Sum AlignLength-->	42540
21803.2		NewCorrectedForAL	1.96988e-05
3581.09		TopEvalCorrectedForAL	3.24702e-05
2904.86		Contig Size	44276
2702.94
2286.09
1030.97
921.052
417.997
35648.2
35648	rounded
Query 15	Hit/Subject Chromosome	%ID	AlignLength	Mismatches	Gaps	q-start	q-end	hit-start	hit-end	evalue	bitscore
NorthernBobwhiteSimpleDeNovoContig_15192	ref|NW_003763785.1|	88.37	27149	2336	821	5165	31764	15712865	15785989	0	34665
NorthernBobwhiteSimpleDeNovoContig_15192	ref|NW_003763785.1|	85.21	3279	339	146	1976	5134	15816287	15813035	0	3730
NorthernBobwhiteSimpleDeNovoContig_15192	ref|NW_003763785.1|	85.29	1856	186	87	172	1975	15818975	15817155	0	2114
Sum Matches bp		Sum AlignLength-->	32284
23991.6		NewCorrectedForAL	2.72188e-05
2794.04		TopEvalCorrectedForAL	3.255e-05
1582.98		Contig Size	31764
28368.6
28369	rounded
Query 16	Hit/Subject Chromosome	%ID	AlignLength	Mismatches	Gaps	q-start	q-end	hit-start	hit-end	evalue	bitscore
NorthernBobwhiteSimpleDeNovoContig_3911	ref|NW_003763812.1|	89.95	27500	2052	713	1	27066	11196998	11169778	0	37087
Sum Matches bp		Sum AlignLength-->	27500
24736.3		NewCorrectedForAL	NA
24736	rounded	TopEvalCorrectedForAL	3.27091e-05
		Contig Size	27066
Query 17	Hit/Subject Chromosome	%ID	AlignLength	Mismatches	Gaps	q-start	q-end	hit-start	hit-end	evalue	bitscore
NorthernBobwhiteSimpleDeNovoContig_19454	ref|NW_003763785.1|	86.98	26515	2560	892	2	25928	3149438	314233228	0	32214
Sum Matches bp		Sum AlignLength-->	26515
23062.7		NewCorrectedForAL	NA
23063	rounded	TopEvalCorrectedForAL	3.28041e-05
		Contig Size	25928
Query 18	Hit/Subject Chromosome	%ID	AlignLength	Mismatches	Gaps	q-start	q-end	hit-start	hit-end	evalue	bitscore
NorthernBobwhiteSimpleDeNovoContig_7216	ref|NW_003763464.1|	85.68	25637	2793	879	20	25052	1897413	1922774	0	29506
NorthernBobwhiteSimpleDeNovoContig_7216	ref|NW_003763464.1|	84.39	14886	1679	644	67997	82475	1965727	1980375	0	16330
NorthernBobwhiteSimpleDeNovoContig_7216	ref|NW_003763464.1|	82.84	8439	1037	411	41357	49453	1937332	1945701	0	8688
NorthernBobwhiteSimpleDeNovoContig_7216	ref|NW_003763464.1|	87.96	6304	636	123	61634	67841	1959470	1965746	0	7923
NorthernBobwhiteSimpleDeNovoContig_7216	ref|NW_003763464.1|	83.07	6817	805	349	49722	56266	1946635	1953374	0	7032
NorthernBobwhiteSimpleDeNovoContig_7216	ref|NW_003763464.1|	87.62	5026	507	115	56555	61505	1954477	1959462	0	6215
NorthernBobwhiteSimpleDeNovoContig_7216	ref|NW_003763464.1|	84	5751	691	229	30347	35963	1927070	932725	0	6159
NorthernBobwhiteSimpleDeNovoContig_7216	ref|NW_003763464.1|	85.79	4687	460	206	36177	40767	1932757	1937333	0	5429
NorthernBobwhiteSimpleDeNovoContig_7216	ref|NW_003763464.1|	83.66	3121	400	110	26190	29215	1923959	1927064	0	3324
NorthernBobwhiteSimpleDeNovoContig_7216	ref|NW_003763464.1|	84.9	2755	280	136	82538	85234	1980374	1983050	0	3090
NorthernBobwhiteSimpleDeNovoContig_7216	ref|NW_003763464.1|	87.01	2409	261	52	87152	89524	1986248	1988640	0	2908
NorthernBobwhiteSimpleDeNovoContig_7216	ref|NW_003763464.1|	85.67	1948	236	49	85232	87145	1983448	1985380	0	2183
Sum Matches bp		Sum AlignLength-->	87780
21965.8		NewCorrectedForAL	9.6942e-06
12562.3		TopEvalCorrectedForAL	3.34204e-05
6990.87		Contig Size	89591
5545
5662.88
4403.78
4830.84
4020.98
2611.03
2339
2096.07
1668.85
74697.4
74697	rounded
Query 19	Hit/Subject Chromosome	%ID	AlignLength	Mismatches	Gaps	q-start	q-end	hit-start	hit-end	evalue	bitscore
NorthernBobwhiteSimpleDeNovoContig_93461	ref|NW_003764121.1|	86.29	25753	2456	1074	3	25072	5127648	5102287	0	30415
Sum Matches bp		Sum AlignLength-->	25753
22222.3		NewCorrectedForAL	NA
22222	rounded	TopEvalCorrectedForAL	3.35068e-05
		Contig Size	25109
Query 20	Hit/Subject Chromosome	%ID	AlignLength	Mismatches	Gaps	q-start	q-end	hit-start	hit-end	evalue	bitscore
NorthernBobwhiteSimpleDeNovoContig_47909	ref|NW_003763687.1|	88.07	26051	2215	892	295	25876	706746	681119	0	32853
NorthernBobwhiteSimpleDeNovoContig_47909	ref|NW_003763687.1|	86.34	5909	536	271	28619	34316	678268	672420	0	6996
NorthernBobwhiteSimpleDeNovoContig_47909	ref|NW_003763687.1|	85.32	2507	274	94	26162	28621	681116	678657	0	2839
NorthernBobwhiteSimpleDeNovoContig_47909	ref|NW_003763687.1|	91.11	270	21	3	1	270	707482	707216	2e-99	372
Sum Matches bp		Sum AlignLength-->	34737
22943.1		NewCorrectedForAL	2.52184e-05
5101.83		TopEvalCorrectedForAL	3.38068e-05
2138.97		Contig Size	34316
245.997
30429.9
30430	rounded
Query 21	Hit/Subject Chromosome	%ID	AlignLength	Mismatches	Gaps	q-start	q-end	hit-start	hit-end	evalue	bitscore
NorthernBobwhiteSimpleDeNovoContig_1508	ref|NW_003763741.1|	88.36	25205	2247	688	297	25157	428249	4273109	0	32018
NorthernBobwhiteSimpleDeNovoContig_1508	ref|NW_003763741.1|	84.62	221	28	6	27	242	4248030	4248249	2e-60	242
Sum Matches bp		Sum AlignLength-->	25426
22271.1		NewCorrectedForAL	3.47388e-05
187.01		TopEvalCorrectedForAL	3.51234e-05
22458.1		Contig Size	25157
22458	rounded
Query 22	Hit/Subject Chromosome	%ID	AlignLength	Mismatches	Gaps	q-start	q-end	hit-start	hit-end	evalue	bitscore
NorthernBobwhiteSimpleDeNovoContig_64848	ref|NW_003764321.1|	85.28	24283	2533	1041	22041	45780	2724049	2700265	0	27551
NorthernBobwhiteSimpleDeNovoContig_64848	ref|NW_003764321.1|	90.54	6226	439	150	15709	21836	230218	2724045	0	8487
NorthernBobwhiteSimpleDeNovoContig_64848	ref|NW_003764321.1|	81.05	4977	608	335	5249	10019	2742186	2737339	0	4720
NorthernBobwhiteSimpleDeNovoContig_64848	ref|NW_003764321.1|	80.74	4591	663	221	10229	14674	2737043	2732529	0	4222
NorthernBobwhiteSimpleDeNovoContig_64848	ref|NW_003764321.1|	85.44	3703	433	106	1608	5248	2746064	2742406	0	4204
NorthernBobwhiteSimpleDeNovoContig_64848	ref|NW_003764321.1|	81.73	1040	123	67	614	1611	2747377	2746363	0	1021
NorthernBobwhiteSimpleDeNovoContig_64848	ref|NW_003764321.1|	83.93	591	58	37	11	568	2748723	2748137	1e-179	639
Sum Matches bp		Sum AlignLength-->	45411
20708.5		NewCorrectedForAL	1.87163e-05
5637.02		TopEvalCorrectedForAL	3.51192e-05
4033.86		Contig Size	45791
3706.77
3163.84
849.992
496.026
38596.1
38596	rounded
Query 23	Hit/Subject Chromosome	%ID	AlignLength	Mismatches	Gaps	q-start	q-end	hit-start	hit-end	evalue	bitscore
NorthernBobwhiteSimpleDeNovoContig_14294	ref|NW_003763668.1|	89.2	25240	2041	686	18	24886	2516989	2541913	0	33152
NorthernBobwhiteSimpleDeNovoContig_14294	ref|NW_003763668.1|	85.1	4066	444	162	25129	29064	2541916	254949	0	4585
NorthernBobwhiteSimpleDeNovoContig_14294	ref|NW_003763668.1|	84.27	3903	406	208	29703	33475	2545953	2549777	0	4341
Sum Matches bp		Sum AlignLength-->	33209
22514.1		NewCorrectedForAL	2.65343e-05
3460.17		TopEvalCorrectedForAL	3.53407e-05
3289.06		Contig Size	33475
29263.3
29263	rounded
Query 24	Hit/Subject Chromosome	%ID	AlignLength	Mismatches	Gaps	q-start	q-end	hit-start	hit-end	evalue	bitscore
NorthernBobwhiteSimpleDeNovoContig_1560	ref|NW_003763735.1|	85.5	24034	2508	976	2246	25533	17770704	17794507	0	27536
NorthernBobwhiteSimpleDeNovoContig_1560	ref|NW_003763735.1|	84.48	12041	1284	585	25544	37215	17794764	17806588	0	13261
NorthernBobwhiteSimpleDeNovoContig_1560	ref|NW_003763735.1|	88.84	1147	112	16	2	1136	17768027	17769169	0	1465
NorthernBobwhiteSimpleDeNovoContig_1560	ref|NW_003763735.1|	83.87	1048	154	15	1190	2225	17769345	17770389	0	1106
Sum Matches bp		Sum AlignLength-->	38270
20549.1		NewCorrectedForAL	2.22717e-05
10172.2		TopEvalCorrectedForAL	3.55746e-05
1018.99		Contig Size	37235
878.958
32619.3
32619	rounded
Query 25	Hit/Subject Chromosome	%ID	AlignLength	Mismatches	Gaps	q-start	q-end	hit-start	hit-end	evalue	bitscore
NorthernBobwhiteSimpleDeNovoContig_20910	ref|NW_003763840.1|	87.01	24328	2185	975	11	23741	3086704	3110653	0	29612
Sum Matches bp		Sum AlignLength-->	24328
21167.8		NewCorrectedForAL	NA
21168	rounded	TopEvalCorrectedForAL	3.57654e-05
		Contig Size	23741
Query 26	Hit/Subject Chromosome	%ID	AlignLength	Mismatches	Gaps	q-start	q-end	hit-start	hit-end	evalue	bitscore
NorthernBobwhiteSimpleDeNovoContig_25091	ref|NW_003763854.1|	87.37	24346	2209	865	1	23968	7559804	753946	0	29966
NorthernBobwhiteSimpleDeNovoContig_25091	ref|NW_003763854.1|	95.57	24293	707	369	24293	32089	7535944	7528037	0	9651
Sum Matches bp		Sum AlignLength-->	48639
21271.1		NewCorrectedForAL	1.8805e-05
23216.8		TopEvalCorrectedForAL	3.58868e-05
44487.9		Contig Size	32489
44488	rounded
Query 27	Hit/Subject Chromosome	%ID	AlignLength	Mismatches	Gaps	q-start	q-end	hit-start	hit-end	evalue	bitscore
NorthernBobwhiteSimpleDeNovoContig_14164	ref|NW_003763853.1|	73.37	28090	6661	818	21787	45207	88515	64871	0	28090
NorthernBobwhiteSimpleDeNovoContig_14164	ref|NW_003763853.1|	83.67	15895	1802	793	6336	21715	104132	88516	0	16918
NorthernBobwhiteSimpleDeNovoContig_14164	ref|NW_003763853.1|	82.94	5152	648	231	48583	53572	61351	56269	0	5348
NorthernBobwhiteSimpleDeNovoContig_14164	ref|NW_003763853.1|	83.8	2284	283	87	4034	6257	106392	104136	0	2430
NorthernBobwhiteSimpleDeNovoContig_14164	ref|NW_003763853.1|	81.64	2277	289	129	45648	47824	64470	62223	0	2230
NorthernBobwhiteSimpleDeNovoContig_14164	ref|NW_003763853.1|	84.53	1816	211	70	1873	3657	108492	106716	0	1986
NorthernBobwhiteSimpleDeNovoContig_14164	ref|NW_003763853.1|	82.87	1926	246	84	1	1862	110657	108752	0	1981
Sum Matches bp		Sum AlignLength-->	57440
20609.6		NewCorrectedForAL	1.36651e-05
13299.3		TopEvalCorrectedForAL	2.61196e-05
4273.07		Contig Size	53699
1913.99
1858.94
1535.06
1596.08
45086.1
45086	rounded
Query 28	Hit/Subject Chromosome	%ID	AlignLength	Mismatches	Gaps	q-start	q-end	hit-start	hit-end	evalue	bitscore
NorthernBobwhiteSimpleDeNovoContig_19319	ref|NW_003763903.1|	90.06	24892	1819	655	1	24453	194623	169948	0	33709
22417.7		Sum AlignLength-->	24892
22418	rounded	NewCorrectedForAL	NA
		TopEvalCorrectedForAL	3.61803e-05
		Contig Size	24457
Query 29	Hit/Subject Chromosome	%ID	AlignLength	Mismatches	Gaps	q-start	q-end	hit-start	hit-end	evalue	bitscore
NorthernBobwhiteSimpleDeNovoContig_17011	ref|NW_001471609.2|	85.93	23664	2093	1236	7822	30730	1888232	1911414	0	27767
NorthernBobwhiteSimpleDeNovoContig_17011	ref|NW_001471609.2|	86.47	3460	335	133	276	3611	1880448	1883898	0	4168
NorthernBobwhiteSimpleDeNovoContig_17011	ref|NW_001471609.2|	87.14	1688	173	44	3611	5282	1884155	1885814	0	2057
NorthernBobwhiteSimpleDeNovoContig_17011	ref|NW_001471609.2|	81.42	1561	178	112	5264	6747	1886035	1887560	0	1505
NorthernBobwhiteSimpleDeNovoContig_17011	ref|NW_001471609.2|	82.23	602	54	53	6859	7445	1887572	1888135	8e-174	619
NorthernBobwhiteSimpleDeNovoContig_17011	ref|NW_001471609.2|	90.29	278	26	1	1	278	1880060	1880336	2e-100	376
Sum Matches bp		Sum AlignLength-->	31253
20334.5		NewCorrectedForAL	2.74523e-05
2991.86		TopEvalCorrectedForAL	3.63125e-05
1470.92		Contig Size	30747
1270.97
495.025
251.006
26814.3
26814	rounded
Query 30	Hit/Subject Chromosome	%ID	AlignLength	Mismatches	Gaps	q-start	q-end	hit-start	hit-end	evalue	bitscore
NorthernBobwhiteSimpleDeNovoContig_4036	ref|NW_001471740.2|	90.5	24751	1935	416	19891	44412	9011331	8986768	0	33884
NorthernBobwhiteSimpleDeNovoContig_4036	ref|NW_001471740.2|	89.62	20181	1554	541	1	19889	9031321	9011390	0	26918
Sum Matches bp		Sum AlignLength-->	44932
22399.7		NewCorrectedForAL	2.00536e-05
18086.2		TopEvalCorrectedForAL	3.65642e-05
40485.9		Contig Size	44419
40486	rounded
Query 31	Hit/Subject Chromosome	%ID	AlignLength	Mismatches	Gaps	q-start	q-end	hit-start	hit-end	evalue	bitscore
NorthernBobwhiteSimpleDeNovoContig_106766	ref|NW_003763496.1|	85.16	23230	2448	1000	1150	23863	2694466	2717211	0	26279
NorthernBobwhiteSimpleDeNovoContig_106766	ref|NW_003763496.1|	87.34	1209	129	24	23861	25047	2717274	2718480	0	1481
NorthernBobwhiteSimpleDeNovoContig_106766	ref|NW_003763496.1|	80.53	1202	136	98	1	1150	2692363	2693518	0	1121
Sum matches bp		Sum AlignLength-->	25641
19782.7		NewCorrectedForAL	3.31685e-05
1055.94		TopEvalCorrectedForAL	3.66595e-05
967.971		Contig Size	25047
21806.6
21807	rounded
Query 32	Hit/Subject Chromosome	%ID	AlignLength	Mismatches	Gaps	q-start	q-end	hit-start	hit-end	evalue	bitscore
NorthernBobwhiteSimpleDeNovoContig_1952	ref|NW_003763785.1|	85.46	23267	2421	962	3	22755	31343387	31320569	0	26660
Sum Matches bp		Sum AlignLength-->	23267
19884		NewCorrectedForAL	NA
19884	rounded	TopEvalCorrectedForAL	3.67301e-05
		Contig Size	22755
Query 33	Hit/Subject Chromosome	%ID	AlignLength	Mismatches	Gaps	q-start	q-end	hit-start	hit-end	evalue	bitscore
NorthernBobwhiteSimpleDeNovoContig_56418	ref|NW_003763668.1|	86.53	22903	2100	985	250	22462	2187650	2210257	0	27338
NorthernBobwhiteSimpleDeNovoContig_56418	ref|NW_003763668.1|	86.64	247	32	1	9	254	2186357	2186603	1e-75	293
Sum Matches bp		Sum AlignLength-->	23150
19925.6		NewCorrectedForAL	3.75819e-05
214.89		TopEvalCorrectedForAL	3.77811e-05
20140.5		Contig Size	22467
20141	rounded
Query 34	Hit/Subject Chromosome	%ID	AlignLength	Mismatches	Gaps	q-start	q-end	hit-start	hit-end	evalue	bitscore
NorthernBobwhiteSimpleDeNovoContig_69832	ref|NW_003763826.1|	86.13	22749	2247	909	1	22191	13314104	13291707	0	26732
Sum Matches bp		Sum AlignLength-->	22749
19593.7		NewCorrectedForAL	NA
19594	rounded	TopEvalCorrectedForAL	3.7861e-05
		Contig Size	22191
Query 35	Hit/Subject Chromosome	%ID	AlignLength	Mismatches	Gaps	q-start	q-end	hit-start	hit-end	evalue	bitscore
NorthernBobwhiteSimpleDeNovoContig_42835	ref|NW_003763735.1|	96.15	23413	196	705	10	23144	5428073	5405088	0	30249
NorthernBobwhiteSimpleDeNovoContig_42835	ref|NW_003763735.1|	88.61	7779	604	282	23287	30927	5404741	5397107	0	10064
Sum Matches bp		Sum AlignLength-->	31192
22511.6		NewCorrectedForAL	3.02228e-05
6892.97		TopEvalCorrectedForAL	4.10669e-05
29404.6		Contig Size	30927
29405	rounded
Query 36	Hit/Subject Chromosome	%ID	AlignLength	Mismatches	Gaps	q-start	q-end	hit-start	hit-end	evalue	bitscore
NorthernBobwhiteSimpleDeNovoContig_13148	ref|NW_003763785.1|	91.32	23776	1383	680	553	24054	24765242	24741873	0	33437
NorthernBobwhiteSimpleDeNovoContig_13148	ref|NW_003763785.1|	84.23	539	64	21	36	554	24766379	24765842	7e-161	576
Sum Matches bp		Sum AlignLength-->	24315
21712.2		NewCorrectedForAL	3.7492e-05
454		TopEvalCorrectedForAL	3.84085e-05
22166.2		Contig Size	24056
22166	rounded
Query 37	Hit/Subject Chromosome	%ID	AlignLength	Mismatches	Gaps	q-start	q-end	hit-start	hit-end	evalue	bitscore
NorthernBobwhiteSimpleDeNovoContig_15075	ref|NW_001488830.2|	88.53	23031	2014	628	12893	35516	1784011	1806820	0	29471
NorthernBobwhiteSimpleDeNovoContig_15075	ref|NW_001488830.2|	88	10348	894	348	35515	45636	1807006	1817231	0	13019
NorthernBobwhiteSimpleDeNovoContig_15075	ref|NW_001488830.2|	86.88	7873	858	175	1	7721	1771600	1779389	0	10177
NorthernBobwhiteSimpleDeNovoContig_15075	ref|NW_001488830.2|	87.01	4425	405	170	7783	12071	1779623	1784013	0	5393
NorthernBobwhiteSimpleDeNovoContig_15075	ref|NW_001488830.2|	75.58	344	69	15	12412	12742	1405551	1405892	2e-57	233
Sum Matches bp		Sum AlignLength-->	46021
20389.3		NewCorrectedForAL	1.90969e-05
9106.24		TopEvalCorrectedForAL	3.84395e-05
6840.06		Contig Size	45642
3850.19
259.995
40445.8
40446	rounded
Query 38	Hit/Subject Chromosome	%ID	AlignLength	Mismatches	Gaps	q-start	q-end	hit-start	hit-end	evalue	bitscore
NorthernBobwhiteSimpleDeNovoContig_28121	ref|NW_001471565.2|	84.58	21864	2438	933	89	21490	3365169	3386570	0	24040
NorthernBobwhiteSimpleDeNovoContig_28121	ref|NW_001471565.2|	85.29	6595	712	258	21959	28419	3387558	3394028	0	7423
Sum Matches bp		Sum AlignLength-->	28459
18492.6		NewCorrectedForAL	2.97772e-05
5624.88		TopEvalCorrectedForAL	3.86846e-05
24117.4		Contig Size	28433
24117	rounded
Query 39	Hit/Subject Chromosome	%ID	AlignLength	Mismatches	Gaps	q-start	q-end	hit-start	hit-end	evalue	bitscore
NorthernBobwhiteSimpleDeNovoContig_70673	ref|NW_003764316.1|	84.85	21864	2413	900	5	21378	2713947	2735400	0	24444
NorthernBobwhiteSimpleDeNovoContig_70673	ref|NW_003764316.1|	82.18	3749	457	211	23517	27095	2737664	2741371	0	3773
NorthernBobwhiteSimpleDeNovoContig_70673	ref|NW_003764316.1|	83.1	2095	273	81	21384	23429	2735602	2737664	0	2201
Sum matches bp		Sum AlignLength-->	27708
18551.6		NewCorrectedForAL	3.04442e-05
3080.93		TopEvalCorrectedForAL	3.88081e-05
1740.94		Contig Size	27167
23373.5
23373	rounded
Query 40	Hit/Subject Chromosome	%ID	AlignLength	Mismatches	Gaps	q-start	q-end	hit-start	hit-end	evalue	bitscore
NorthernBobwhiteSimpleDeNovoContig_53420	ref|NW_003764298.1|	86.33	22171	2144	887	10021	31653	399525	421346	0	26103
NorthernBobwhiteSimpleDeNovoContig_53420	ref|NW_003764298.1|	82.06	4085	505	228	5	3991	389412	39366	0	3993
NorthernBobwhiteSimpleDeNovoContig_53420	ref|NW_003764298.1|	79.01	3035	330	307	6549	9458	395945	398787	0	2636
NorthernBobwhiteSimpleDeNovoContig_53420	ref|NW_003764298.1|	81.01	2206	300	119	3990	6152	393813	395942	0	2089
NorthernBobwhiteSimpleDeNovoContig_53420	ref|NW_003764298.1|	84.71	425	49	16	9592	398785	10004	399205	1e-128	470
Sum Matches bp		Sum AlignLength-->	31922
19140.2		NewCorrectedForAL	2.65325e-05
3352.15		TopEvalCorrectedForAL	3.89383e-05
2397.95		Contig Size	31654
1787.08
360.017
27037.4
27037	rounded
Query 41	Hit/Subject Chromosome	%ID	AlignLength	Mismatches	Gaps	q-start	q-end	hit-start	hit-end	evalue	bitscore
NorthernBobwhiteSimpleDeNovoContig_51920	ref|NW_001471710.2|	86.12	22093	2229	837	3324	24871	2397785	2419585	0	25935
NorthernBobwhiteSimpleDeNovoContig_51920	ref|NW_001471710.2|	86.81	3343	319	122	26119	29417	2422221	2425485	0	4006
NorthernBobwhiteSimpleDeNovoContig_51920	ref|NW_001471710.2|	85.03	2478	274	97	29435	31864	2425952	2428380	0	2785
NorthernBobwhiteSimpleDeNovoContig_51920	ref|NW_001471710.2|	82.1	2553	288	169	651	3102	2394854	2397338	0	2538
NorthernBobwhiteSimpleDeNovoContig_51920	ref|NW_001471710.2|	88.4	1276	119	29	24872	26120	2419674	2420947	0	1629
NorthernBobwhiteSimpleDeNovoContig_51920	ref|NW_001471710.2|	88.59	368	36	6	25	387	2393723	2394089	3e-129	471
Sum Matches bp		Sum AlignLength-->	32111
19026.5		NewCorrectedForAL	2.67535e-05
2902.06		TopEvalCorrectedForAL	3.89807e-05
2107.04		Contig Size	31864
2096.01
1127.98
326.011
27585.6
27586	rounded
Query 42	Hit/Subject Chromosome	%ID	AlignLength	Mismatches	Gaps	q-start	q-end	hit-start	hit-end	evalue	bitscore
NorthernBobwhiteSimpleDeNovoContig_14518	ref|NW_003763748.1|	86.62	22077	2020	935	33575	55120	4609023	4630695	0	26454
NorthernBobwhiteSimpleDeNovoContig_14518	ref|NW_003763748.1|	84.1	5992	699	254	15132	20947	4587714	4593627	0	6432
NorthernBobwhiteSimpleDeNovoContig_14518	ref|NW_003763748.1|	81.77	4804	533	343	8691	13253	4579114	4583815	0	4785
NorthernBobwhiteSimpleDeNovoContig_14518	ref|NW_003763748.1|	79.46	4887	696	308	22850	27489	4597042	4601867	0	4307
NorthernBobwhiteSimpleDeNovoContig_14518	ref|NW_003763748.1|	86.14	2806	326	63	1	2761	4570563	4573350	0	3238
NorthernBobwhiteSimpleDeNovoContig_14518	ref|NW_003763748.1|	81.42	2804	373	148	29459	32163	4604574	4607328	0	2715
NorthernBobwhiteSimpleDeNovoContig_14518	ref|NW_003763748.1|	81.85	2209	262	139	5685	7828	4576400	4578534	0	2143
NorthernBobwhiteSimpleDeNovoContig_14518	ref|NW_003763748.1|	86.27	1442	134	64	32178	33576	4607430	4608850	0	1698
NorthernBobwhiteSimpleDeNovoContig_14518	ref|NW_003763748.1|	81.63	1426	188	74	21291	22670	4595326	4596726	0	1350
NorthernBobwhiteSimpleDeNovoContig_14518	ref|NW_003763748.1|	81.29	1320	179	68	3668	4927	4575105	4576416	0	1216
NorthernBobwhiteSimpleDeNovoContig_14518	ref|NW_003763748.1|	79.97	1268	151	103	13870	15054	4585626	4586873	0	1135
NorthernBobwhiteSimpleDeNovoContig_14518	ref|NW_003763748.1|	76.35	816	160	33	2811	28921	4602629	4603416	5e-161	578
NorthernBobwhiteSimpleDeNovoContig_14518	ref|NW_003763748.1|	79.91	468	73	21	7828	8295	4578616	4579072	5e-110	408
NorthernBobwhiteSimpleDeNovoContig_14518	ref|NW_003763748.1|	80.18	434	57	29	13250	13671	4585194	4585610	1e-105	394
Sum Matches bp		Sum AlignLength-->	52753
19123.1		NewCorrectedForAL	1.59267e-05
5039.27		TopEvalCorrectedForAL	3.92354e-05
3928.23		Contig Size	55124
3883.21
2417.09
2283.02
1808.07
1244.01
1164.04
1073.03
1014.02
623.016
373.979
347.981
44322.1
44322	rounded
Query 43	Hit/Subject Chromosome	%ID	AlignLength	Mismatches	Gaps	q-start	q-end	hit-start	hit-end	evalue	bitscore
NorthernBobwhiteSimpleDeNovoContig_2537	ref|NW_003764080.1|	89.15	22657	1898	560	6568	28912	1320515	1342923	0	29652
NorthernBobwhiteSimpleDeNovoContig_2537	ref|NW_003764080.1|	87.79	6665	615	199	49	6570	1313829	1320437	0	8331
Sum Matches bp		Sum AlignLength-->	29322
20198.7		NewCorrectedForAL	3.02985e-05
5851.2		TopEvalCorrectedForAL	3.93477e-05
26049.9		Contig Size	28912
26050	rounded
Query 44	Hit/Subject Chromosome	%ID	AlignLength	Mismatches	Gaps	q-start	q-end	hit-start	hit-end	evalue	bitscore
NorthernBobwhiteSimpleDeNovoContig_63983	ref|NW_003763903.1|	89.8	22800	1632	694	2	22367	2860433	2882972	0	30617
Sum Matches Bp		Sum AlignLength-->	22800
20474.4		NewCorrectedForAL	NA
20474	rounded	TopEvalCorrectedForAL	3.9386e-05
		Contig Size	22367
Query 45	Hit/Subject Chromosome	%ID	AlignLength	Mismatches	Gaps	q-start	q-end	hit-start	hit-end	evalue	bitscore
NorthernBobwhiteSimpleDeNovoContig_5280	ref|NW_003764128.1|	87.75	22269	1995	733	994	22828	7014223	6992254	0	27868
NorthernBobwhiteSimpleDeNovoContig_5280	ref|NW_003764128.1|	71.78	1173	299	32	1	967	7015126	7014188	0	1173
Sum Matches bp		Sum AlignLength-->	23442
19541		NewCorrectedForAL	3.70919e-05
841.979		TopEvalCorrectedForAL	3.94046e-05
20383		Contig Size	22828
20383	rounded
Query 46	Hit/Subject Chromosome	%ID	AlignLength	Mismatches	Gaps	q-start	q-end	hit-start	hit-end	evalue	bitscore
NorthernBobwhiteSimpleDeNovoContig_69017	ref|NW_001488830.2|	88.37	22378	1887	715	4	21931	1698127	1720239	0	28590
NorthernBobwhiteSimpleDeNovoContig_69017	ref|NW_001488830.2|	77.67	3148	621	82	22957	26024	1721996	1725141	0	4138
NorthernBobwhiteSimpleDeNovoContig_69017	ref|NW_001488830.2|	87.86	1030	90	35	21927	22952	1720884	1721882	0	1290
Sum Matches bp		Sum AlignLength-->	26556
19775.4		NewCorrectedForAL	3.27911e-05
2445.05		TopEvalCorrectedForAL	3.94897e-05
904.958		Contig Size	26034
23125.4
23125	rounded
Query 47	Hit/Subject Chromosome	%ID	AlignLength	Mismatches	Gaps	q-start	q-end	hit-start	hit-end	evalue	bitscore
NorthernBobwhiteSimpleDeNovoContig_1277	ref|NW_001471710.2|	88.82	22365	1852	715	11	21946	7794815	7816893	0	28674
Sum Matches bp		Sum AlignLength-->	22365
19864.6		NewCorrectedForAL	NA
19865	rounded	TopEvalCorrectedForAL	3.97138e-05
		Contig Size	21946
Query 48	Hit/Subject Chromosome	%ID	AlignLength	Mismatches	Gaps	q-start	q-end	hit-start	hit-end	evalue	bitscore
NorthernBobwhiteSimpleDeNovoContig_57732	ref|NW_003764121.1|	86.32	21754	2207	769	1	21324	3065880	3087294	0	25668
NorthernBobwhiteSimpleDeNovoContig_57732	ref|NW_003764121.1|	87.88	495	52	8	21412	21905	3087294	3087781	2e-174	621
Sum Matches bp		Sum AlignLength-->	22249
18778.1		NewCorrectedForAL	3.88127e-05
435.006		TopEvalCorrectedForAL	3.96801e-05
19213.1		Contig Size	21905
19213	rounded
Query 49	Hit/Subject Chromosome	%ID	AlignLength	Mismatches	Gaps	q-start	q-end	hit-start	hit-end	evalue	bitscore
NorthernBobwhiteSimpleDeNovoContig_5181	ref|NW_003763493.1|	88.64	22292	1928	605	6039	27963	2318375	2340428	0	28664
NorthernBobwhiteSimpleDeNovoContig_5181	ref|NW_003763493.1|	84.99	5810	645	227	395	6042	2312531	2318275	0	6531
NorthernBobwhiteSimpleDeNovoContig_5181	ref|NW_003763493.1|	87.17	717	75	17	27952	28655	2341124	2341836	0	857
NorthernBobwhiteSimpleDeNovoContig_5181	ref|NW_003763493.1|	92.98	399	21	7	1	399	2312061	2312452	0	596
Sum Matches bp		Sum AlignLength-->	29218
19759.6		NewCorrectedForAL	3.00975e-05
4937.92		TopEvalCorrectedForAL	3.97631e-05
625.009		Contig Size	28805
370.99
25693.5
25694	rounded
Query 50	Hit/Subject Chromosome	%ID	AlignLength	Mismatches	Gaps	q-start	q-end	hit-start	hit-end	evalue	bitscore
NorthernBobwhiteSimpleDeNovoContig_39333	ref|NW_003764320.1|	82.72	20767	2522	1066	11460	31611	4207168	4227483	0	21208
NorthernBobwhiteSimpleDeNovoContig_39333	ref|NW_003764320.1|	86.88	10009	959	354	1603	11392	4197197	4207170	0	12076
NorthernBobwhiteSimpleDeNovoContig_39333	ref|NW_003764320.1|	83.16	10588	1207	576	35604	45789	4230990	4241403	0	11093
NorthernBobwhiteSimpleDeNovoContig_39333	ref|NW_003764320.1|	92.74	4313	144	169	45938	50149	4241402	4245646	0	4991
NorthernBobwhiteSimpleDeNovoContig_39333	ref|NW_003764320.1|	83.46	4612	576	187	53585	58101	4248523	4253042	0	4812
NorthernBobwhiteSimpleDeNovoContig_39333	ref|NW_003764320.1|	80.42	3029	377	216	32071	34967	4227482	4230426	0	2818
NorthernBobwhiteSimpleDeNovoContig_39333	ref|NW_003764320.1|	86.4	1684	122	107	27	1626	4195544	4197204	0	2006
NorthernBobwhiteSimpleDeNovoContig_39333	ref|NW_003764320.1|	85.91	1448	163	41	51956	53384	4247011	4248436	0	1653
NorthernBobwhiteSimpleDeNovoContig_39333	ref|NW_003764320.1|	87.16	1269	116	47	50154	51382	4245737	4246998	0	1528
Sum Matches bp		Sum AlignLength-->	57719
17178.5		NewCorrectedForAL	1.46388e-05
8695.82		TopEvalCorrectedForAL	3.98324e-05
8804.98		Contig Size	58101
3999.88
3849.18
2435.92
1454.98
1243.98
1106.06
48769.2
48769	rounded
Query 51	Hit/Subject Chromosome	%ID	AlignLength	Mismatches	Gaps	q-start	q-end	hit-start	hit-end	evalue	bitscore
NorthernBobwhiteSimpleDeNovoContig_8712	ref|NW_003763785.1|	88.53	22180	1859	686	1	21796	22921892	22900015	0	28499
NorthernBobwhiteSimpleDeNovoContig_8712	ref|NW_003763785.1|	90.85	6962	493	144	21902	28756	22900015	22893091	0	9638
Sum Matches bp		Sum AlignLength-->	29142
19636		NewCorrectedForAL	3.05691e-05
6324.98		TopEvalCorrectedForAL	3.99143e-05
25960.9		Contig Size	28762
25961	rounded
Query 52	Hit/Subject Chromosome	%ID	AlignLength	Mismatches	Gaps	q-start	q-end	hit-start	hit-end	evalue	bitscore
NorthernBobwhiteSimpleDeNovoContig_53126	ref|NW_003763711.1|	88.67	22194	1753	763	942	22763	1334967	1313165	0	28638
NorthernBobwhiteSimpleDeNovoContig_53126	ref|NW_003763711.1|	83.61	3349	389	160	22980	26238	1313128	1309850	0	3537
NorthernBobwhiteSimpleDeNovoContig_53126	ref|NW_003763711.1|	82.27	1038	93	91	1	968	1336885	1335869	0	1058
Sum Matches bp		Sum AlignLength-->	26581
19679.4		NewCorrectedForAL	3.30239e-05
2800.1		TopEvalCorrectedForAL	3.99522e-05
853.963		Contig Size	26238
23333.5
23333	rounded
Query 53	Hit/Subject Chromosome	%ID	AlignLength	Mismatches	Gaps	q-start	q-end	hit-start	hit-end	evalue	bitscore
NorthernBobwhiteSimpleDeNovoContig_75545	ref|NW_003763826.1|	90.22	22580	1607	602	70	22327	3747463	3769762	0	30645
Sum Matches bp		Sum AlignLength-->	22580
20371.7		NewCorrectedForAL	NA
20372	rounded	TopEvalCorrectedForAL	3.99557e-05
		Contig Size	22348
Query 54	Hit/Subject Chromosome	%ID	AlignLength	Mismatches	Gaps	q-start	q-end	hit-start	hit-end	evalue	bitscore
NorthernBobwhiteSimpleDeNovoContig_3614	ref|NW_003763785.1|	87.71	21951	1979	718	15	21613	3625682	3647266	0	27425
NorthernBobwhiteSimpleDeNovoContig_3614	ref|NW_003763785.1|	84.77	1070	138	25	21659	22706	3647239	3648305	0	1177
Sum Matches bp		Sum AlignLength-->	23021
19253.2		NewCorrectedForAL	3.80401e-05
907.039		TopEvalCorrectedForAL	3.99572e-05
20160.3		Contig Size	22706
20160	rounded
Query 55	Hit/Subject Chromosome	%ID	AlignLength	Mismatches	Gaps	q-start	q-end	hit-start	hit-end	evalue	bitscore
NorthernBobwhiteSimpleDeNovoContig_2456	ref|NW_001488830.2|	82.69	20646	2628	945	13728	33743	19638114	19617784	0	21006
NorthernBobwhiteSimpleDeNovoContig_2456	ref|NW_001488830.2|	85.01	5209	618	163	8620	13731	19643995	19638853	0	5804
NorthernBobwhiteSimpleDeNovoContig_2456	ref|NW_001488830.2|	79.14	3433	492	224	68	3380	19653869	19650541	0	2962
NorthernBobwhiteSimpleDeNovoContig_2456	ref|NW_001488830.2|	83.47	2643	310	127	6078	8620	19646718	19644103	0	2780
NorthernBobwhiteSimpleDeNovoContig_2456	ref|NW_001488830.2|	80.23	2129	219	202	4091	6094	19648947	19646896	0	1970
NorthernBobwhiteSimpleDeNovoContig_2456	ref|NW_001488830.2|	79.94	703	100	41	3400	4088	19650427	19649752	2e-168	601
Sum Matches bp		Sum AlignLength-->	34763
17072.2		NewCorrectedForAL	2.37433e-05
4428.17		TopEvalCorrectedForAL	4.00513e-05
2716.88		Contig Size	33754
2206.11
1708.1
561.978
28693.4
28693	rounded
Query 56	Hit/Subject Chromosome	%ID	AlignLength	Mismatches	Gaps	q-start	q-end	hit-start	hit-end	evalue	bitscore
NorthernBobwhiteSimpleDeNovoContig_40285	ref|NW_003763496.1|	84.54	20960	2144	1096	1	20272	9904716	9884165	0	23351
Sum Matches bp		Sum AlignLength-->	20960
17719.6		NewCorrectedForAL	NA
17720	rounded	TopEvalCorrectedForAL	4.0334e-05
		Contig Size	20272
Query 57	Hit/Subject Chromosome	%ID	AlignLength	Mismatches	Gaps	q-start	q-end	hit-start	hit-end	evalue	bitscore
NorthernBobwhiteSimpleDeNovoContig_43566	ref|NW_003763831.1|	83.65	20702	2330	1055	112	20329	567421	547291	0	22005
NorthernBobwhiteSimpleDeNovoContig_43566	ref|NW_003763831.1|	84.75	2124	225	99	20321	22418	546427	544377	0	2329
Sum Matches bp		Sum AlignLength-->	22826
17317.2		NewCorrectedForAL	3.6691e-05
1800.09		TopEvalCorrectedForAL	4.04067e-05
19117.3		Contig Size	22418
19117	rounded
Query 58	Hit/Subject Chromosome	%ID	AlignLength	Mismatches	Gaps	q-start	q-end	hit-start	hit-end	evalue	bitscore
NorthernBobwhiteSimpleDeNovoContig_83177	ref|NW_003763812.1|	91.69	22673	1432	451	1	22405	22118717	22096228	0	32368
Sum Matches bp		Sum AlignLength-->	22673
20788.9		NewCorrectedForAL	NA
20789	rounded	TopEvalCorrectedForAL	4.04402e-05
		Contig Size	22405
Query 59	Hit/Subject Chromosome	%ID	AlignLength	Mismatches	Gaps	q-start	q-end	hit-start	hit-end	evalue	bitscore
NorthernBobwhiteSimpleDeNovoContig_3267	ref|NW_001488830.2|	82.93	20472	2592	903	11180	31088	19470795	19450664	0	21070
NorthernBobwhiteSimpleDeNovoContig_3267	ref|NW_001488830.2|	83.01	9009	1137	394	32810	41622	19448572	19439762	0	9227
NorthernBobwhiteSimpleDeNovoContig_3267	ref|NW_001488830.2|	81.62	2857	335	190	41648	44359	19439365	19436554	0	2809
NorthernBobwhiteSimpleDeNovoContig_3267	ref|NW_001488830.2|	84.47	1822	250	33	31099	32899	19450378	19448569	0	1977
NorthernBobwhiteSimpleDeNovoContig_3267	ref|NW_001488830.2|	77.57	1895	351	74	9290	11123	5146280	5148161	0	1507
NorthernBobwhiteSimpleDeNovoContig_3267	ref|NW_003763687.1|	83.58	3556	435	149	2705	6155	3819318	3815807	0	3766
NorthernBobwhiteSimpleDeNovoContig_3267	ref|NW_003763687.1|	82.14	3074	418	131	6269	9284	3815760	38122760	0	3079
Sum Matches bp		Sum AlignLength-->	42685
16977.4		NewCorrectedForAL	1.93709e-05
7478.37		TopEvalCorrectedForAL	4.0509e-05
2331.88		Contig Size	45812
1539.04
1469.95
2972.1
2524.98
35293.8
35294	rounded
Query 60	Hit/Subject Chromosome	%ID	AlignLength	Mismatches	Gaps	q-start	q-end	hit-start	hit-end	evalue	bitscore
NorthernBobwhiteSimpleDeNovoContig_1577	ref|NW_003763826.1|	87.47	21551	1959	742	74	21152	3858459	3837179	0	26590
Sum Matches bp		Sum AlignLength-->	21551
18850.7		NewCorrectedForAL	NA
18851	rounded	TopEvalCorrectedForAL	4.05874e-05
		Contig Size	21161
Query 61	Hit/Subject Chromosome	%ID	AlignLength	Mismatches	Gaps	q-start	q-end	hit-start	hit-end	evalue	bitscore
NorthernBobwhiteSimpleDeNovoContig_59785	ref|NW_003763484.1|	87.92	21556	1923	682	5548	26671	11544887	11566192	0	27031
NorthernBobwhiteSimpleDeNovoContig_59785	ref|NW_003763484.1|	85.19	4969	587	149	79	4988	11539793	11544671	0	5552
NorthernBobwhiteSimpleDeNovoContig_59785	ref|NW_003763484.1|	90.9	3318	272	30	26661	29968	11566470	11569767	0	4599
Sum Matches bp		Sum AlignLength-->	29843
18952		NewCorrectedForAL	2.94193e-05
4233.09		TopEvalCorrectedForAL	4.07868e-05
3016.06		Contig Size	29974
26201.2
26201	rounded
Query 62	Hit/Subject Chromosome	%ID	AlignLength	Mismatches	Gaps	q-start	q-end	hit-start	hit-end	evalue	bitscore
NorthernBobwhiteSimpleDeNovoContig_5671	ref|NW_003763912.1|	85.82	20974	2100	875	1	20442	5903916	5883286	0	24393
Sum Matches bp		Sum AlignLength-->	20974
17999.9		NewCorrectedForAL	NA
18000	rounded	TopEvalCorrectedForAL	4.09173e-05
		Contig Size	20450
Query 63	Hit/Subject Chromosome	%ID	AlignLength	Mismatches	Gaps	q-start	q-end	hit-start	hit-end	evalue	bitscore
NorthernBobwhiteSimpleDeNovoContig_23853	ref|NW_001471685.2|	87.91	21417	2166	424	1	21089	10332551	10311231	0	26743
NorthernBobwhiteSimpleDeNovoContig_23853	ref|NW_001471685.2|	85.48	6418	691	241	21244	27504	10311226	10304893	0	7310
Sum Matches bp		Sum AlignLength-->	27835
18827.7		NewCorrectedForAL	3.13815e-05
5486.11		TopEvalCorrectedForAL	4.10468e-05
24313.8		Contig Size	27507
24314	rounded
Query 64	Hit/Subject Chromosome	%ID	AlignLength	Mismatches	Gaps	q-start	q-end	hit-start	hit-end	evalue	bitscore
NorthernBobwhiteSimpleDeNovoContig_40758	ref|NW_003764317.1|	83.4	20304	2364	1006	491	20089	5871387	5851385	0	21374
NorthernBobwhiteSimpleDeNovoContig_40758	ref|NW_003764317.1|	85.24	3449	369	140	20300	23676	5851384	584004	0	3898
NorthernBobwhiteSimpleDeNovoContig_40758	ref|NW_003764317.1|	82.35	102	15	3	225	353	929	828	4e-18	102
Sum Matches bp		Sum AlignLength-->	23855
16933.5		NewCorrectedForAL	3.50701e-05
2939.93		TopEvalCorrectedForAL	4.10757e-05
83.997		Contig Size	23683
19957.5
19957	rounded
Query 65	Hit/Subject Chromosome	%ID	AlignLength	Mismatches	Gaps	q-start	q-end	hit-start	hit-end	evalue	bitscore
NorthernBobwhiteSimpleDeNovoContig_4309	ref|NW_003764319.1|	83.47	20303	2407	950	2384	22017	2952816	9503795	0	2145
NorthernBobwhiteSimpleDeNovoContig_4309	ref|NW_003764319.1|	81.65	9771	1187	606	38446	47878	9485530	9476028	0	9434
NorthernBobwhiteSimpleDeNovoContig_4309	ref|NW_003764319.1|	78.1	8962	1309	654	52579	61009	9470239	9461401	0	7333
NorthernBobwhiteSimpleDeNovoContig_4309	ref|NW_003764319.1|	82.87	5926	806	209	22121	27937	9503774	9497949	0	6082
NorthernBobwhiteSimpleDeNovoContig_4309	ref|NW_003764319.1|	79.12	6955	973	479	28178	34808	9497178	9490679	0	5977
NorthernBobwhiteSimpleDeNovoContig_4309	ref|NW_003764319.1|	78.32	4234	576	342	48526	52489	9474398	9470237	0	3508
NorthernBobwhiteSimpleDeNovoContig_4309	ref|NW_003764319.1|	83.16	2364	298	100	34841	37152	9490593	9488278	0	2419
NorthernBobwhiteSimpleDeNovoContig_4309	ref|NW_003764319.1|	79.82	2720	432	117	65160	67797	9453436	9450752	0	2378
NorthernBobwhiteSimpleDeNovoContig_4309	ref|NW_003764319.1|	79.97	2351	348	123	105	2379	9526332	9524029	0	2069
NorthernBobwhiteSimpleDeNovoContig_4309	ref|NW_003764319.1|	73.55	2722	409	311	61026	63491	9461315	9458649	0	1808
NorthernBobwhiteSimpleDeNovoContig_4309	ref|NW_003764319.1|	79.94	1695	224	116	63484	65133	9455167	9453544	0	1525
NorthernBobwhiteSimpleDeNovoContig_4309	ref|NW_003764319.1|	84.76	1273	160	34	37168	38411	9487087	9485820	0	1407
NorthernBobwhiteSimpleDeNovoContig_4309	ref|NW_003764319.1|	76.26	1807	277	152	70077	71775	9389004	9447166	0	1359
NorthernBobwhiteSimpleDeNovoContig_4309	ref|NW_003764319.1|	78.79	1438	200	105	68117	69458	9447166	9445738	0	1200
NorthernBobwhiteSimpleDeNovoContig_4309	ref|NW_003764319.1|	78.87	1065	165	60	72157	73189	9386341	9385305	0	897
NorthernBobwhiteSimpleDeNovoContig_4309	ref|NW_003764319.1|	74.38	1093	224	56	23109	24186	1347005	1345954	0	740
Sum matches bp		Sum AlignLength-->	74679
16946.9		NewCorrectedForAL	1.08072e-05
7978.02		TopEvalCorrectedForAL	4.11122e-05
6999.32		Contig Size	73962
4910.88
5502.8
3316.07
1965.9
2171.1
1880.09
2002.03
1354.98
1078.99
1378.02
1133
839.966
812.973
60271.1
60271	rounded
Query 66	Hit/Subject Chromosome	%ID	AlignLength	Mismatches	Gaps	q-start	q-end	hit-start	hit-end	evalue	bitscore
NorthernBobwhiteSimpleDeNovoContig_2492	ref|NW_001471740.2|	88.93	21613	1743	649	10	21218	12647120	1265753	0	28079
NorthernBobwhiteSimpleDeNovoContig_2492	ref|NW_001471740.2|	88.15	844	73	27	21501	22337	12625619	12624796	0	1068
Sum Matches bp		Sum AlignLength-->	22457
19220.4		NewCorrectedForAL	3.95862e-05
743.986		TopEvalCorrectedForAL	4.11465e-05
19964.4		Contig Size	22337
19964	rounded
Query 67	Hit/Subject Chromosome	%ID	AlignLength	Mismatches	Gaps	q-start	q-end	hit-start	hit-end	evalue	bitscore
NorthernBobwhiteSimpleDeNovoContig_44303	ref|NW_003763493.1	87.42	21218	2021	649	1	20919	3058887	3079754	0	26123
Sum Matches bp		Sum AlignLength-->	21218
18548.8		NewCorrectedForAL	NA
18549	rounded	TopEvalCorrectedForAL	4.12009e-05
		Contig Size	20919
Query 68	Hit/Subject Chromosome	%ID	AlignLength	Mismatches	Gaps	q-start	q-end	hit-start	hit-end	evalue	bitscore
NorthernBobwhiteSimpleDeNovoContig_12224	ref|NW_001471710.2|	84.87	20554	2177	932	5397	25438	6045793	6065926	0	22844
NorthernBobwhiteSimpleDeNovoContig_12224	ref|NW_001471710.2|	81.09	6413	813	400	28808	34966	6069279	6075545	0	6093
NorthernBobwhiteSimpleDeNovoContig_12224	ref|NW_001471710.2|	83.57	3323	410	136	25485	28736	6066033	606290	0	3375
NorthernBobwhiteSimpleDeNovoContig_12224	ref|NW_001471710.2|	83.61	958	140	17	3302	4247	6044168	6045120	0	1012
NorthernBobwhiteSimpleDeNovoContig_12224	ref|NW_001471710.2|	82.57	826	121	23	2483	3301	6043205	6044014	0	812
NorthernBobwhiteSimpleDeNovoContig_12224	ref|NW_001471710.2|	85.15	707	71	34	1254	1947	6041677	6042362	0	787
NorthernBobwhiteSimpleDeNovoContig_12224	ref|NW_001471710.2|	81.61	647	99	20	615	1258	6040940	6041569	0	618
NorthernBobwhiteSimpleDeNovoContig_12224	ref|NW_001471710.2|	79.12	637	96	37	1	602	6040207	6040841	1e-146	529
Sum Matches bp		Sum AlignLength-->	34065
17444.2		NewCorrectedForAL	2.45936e-05
5200.3		TopEvalCorrectedForAL	4.12912e-05
2777.03		Contig Size	34988
800.984
682.028
602.01
528.017
503.994
28538.5
28539	rounded
Query 69	Hit/Subject Chromosome	%ID	AlignLength	Mismatches	Gaps	q-start	q-end	hit-start	hit-end	evalue	bitscore
NorthernBobwhiteSimpleDeNovoContig_30481	ref|NW_003764318.1|	82.32	19901	2542	977	8	19396	2234624	2215189	0	19962
NorthernBobwhiteSimpleDeNovoContig_30481	ref|NW_003764318.1|	80.25	10421	1449	609	21101	31096	2213055	2202819	0	9557
NorthernBobwhiteSimpleDeNovoContig_30481	ref|NW_003764318.1|	78.85	1092	158	73	19442	20491	2215217	2214157	0	917
Sum Matches bp		Sum AlignLength-->	31414
16382.5		NewCorrectedForAL	2.59475e-05
8362.85		TopEvalCorrectedForAL	4.13648e-05
861.042		Contig Size	31104
25606.4
25606	rounded
Query 70	Hit/Subject Chromosome	%ID	AlignLength	Mismatches	Gaps	q-start	q-end	hit-start	hit-end	evalue	bitscore
NorthernBobwhiteSimpleDeNovoContig_41810	ref|NW_003763475.1|	87.44	20954	1934	697	2	20577	2918008	2938642	0	25897
NorthernBobwhiteSimpleDeNovoContig_41810	ref|NW_003763475.1|	86.57	6537	621	257	20575	26979	293879	294390	0	7827
Sum Matches bp		Sum AlignLength-->	27491
18322.2		NewCorrectedForAL	1.84994e-05
5659.08		TopEvalCorrectedForAL	4.17295e-05
23981.3		Contig Size	26983
13981	rounded
Query 71	Hit/Subject Chromosome	%ID	AlignLength	Mismatches	Gaps	q-start	q-end	hit-start	hit-end	evalue	bitscore
NorthernBobwhiteSimpleDeNovoContig_31345	ref|NW_001471668.2|	88.54	21186	1641	786	4906	25556	9039568	9018634	0	27320
NorthernBobwhiteSimpleDeNovoContig_31345	ref|NW_001471668.2|	94.01	4955	180	117	1	4916	9044569	9039691	0	7595
Sum Matches bp		Sum AlignLength-->	26141
18758.1		NewCorrectedForAL	3.42664e-05
4658.2		TopEvalCorrectedForAL	4.17917e-05
23416.3		Contig Size	25560
23416	rounded
54728
Query 72	Hit/Subject Chromosome	%ID	AlignLength	Mismatches	Gaps	q-start	q-end	hit-start	hit-end	evalue	bitscore
NorthernBobwhiteSimpleDeNovoContig_27458	ref|NW_003764319.1|	86.85	20771	1907	824	2920	23089	3191623	3212170	0	25037
NorthernBobwhiteSimpleDeNovoContig_27458	ref|NW_003764319.1|	87.35	17610	1601	626	9911	27186	3198856	3216173	0	21650
NorthernBobwhiteSimpleDeNovoContig_27458	ref|NW_003764319.1|	84.77	12761	1384	559	37077	49516	3226075	3238597	0	14175
NorthernBobwhiteSimpleDeNovoContig_27458	ref|NW_003764319.1|	85.81	6956	770	217	28592	35379	3217463	3224369	0	8051
NorthernBobwhiteSimpleDeNovoContig_27458	ref|NW_003764319.1|	83.13	5322	598	300	49559	54711	3238744	3243934	0	5571
NorthernBobwhiteSimpleDeNovoContig_27458	ref|NW_003764319.1|	89.49	2950	269	41	2	2922	3188155	3191092	0	3887
NorthernBobwhiteSimpleDeNovoContig_27458	ref|NW_003764319.1|	82.54	1667	205	86	35379	36987	3224438	3226076	0	1673
NorthernBobwhiteSimpleDeNovoContig_27458	ref|NW_003764319.1|	82.69	1300	184	41	27246	28527	3216169	3217445	0	1326
Sum Matches bp		Sum AlignLength-->	69337
18039.6		NewCorrectedForAL	1.24226e-05
15382.3		TopEvalCorrectedForAL	4.18131e-05
10817.5		Contig Size	54728
5968.94
4424.18
2639.95
1375.94
1074.97
59723.4
59723	rounded
Query 73	Hit/Subject Chromosome	%ID	AlignLength	Mismatches	Gaps	q-start	q-end	hit-start	hit-end	evalue	bitscore
NorthernBobwhiteSimpleDeNovoContig_4250	ref|NW_003763854.1|	87.83	20990	1886	648	1	20685	10374199	10394845	0	26337
NorthernBobwhiteSimpleDeNovoContig_4250	ref|NW_003763854.1|	91.9	2185	155	22	21355	23520	10395615	10397769	0	3122
NorthernBobwhiteSimpleDeNovoContig_4250	ref|NW_003763854.1|	85.91	511	64	8	20686	21194	10395113	10395617	2e-162	581
Sum Matches bp		Sum AlignLength-->	23686
18435.5		NewCorrectedForAL	3.72228e-05
2008.02		TopEvalCorrectedForAL	4.18437e-05
439		Contig Size	23521
20882.5
20883	rounded
Query 74	Hit/Subject Chromosome	%ID	AlignLength	Mismatches	Gaps	q-start	q-end	hit-start	hit-end	evalue	bitscore
NorthernBobwhiteSimpleDeNovoContig_30943	ref|NW_003763854.1|	87.84	20823	1967	565	2	20542	14058841	14038302	0	25930
NorthernBobwhiteSimpleDeNovoContig_30943	ref|NW_003763854.1|	87.67	7240	630	263	20911	27968	14038257	14031099	0	9007
Sum Matches bp		Sum AlignLength-->	28063
18290.9		NewCorrectedForAL	3.12851e-05
6347.31		TopEvalCorrectedForAL	4.21841e-05
24638.2		Contig Size	27973
24638	rounded

## Sheet: Taeniopygia_guttata3.2.4
Table S12-B: NB1.0 QC Analysis on Conserved Outliers Using Additional (Appended) Non-overlapping Blastn data (T. guttata 3.2.4) To Recalculate the Composite Variable													Legend	Definition/Descriptions
Query 1	Hit/Subject Chromosome	%ID	AlignLength	Mismatches	Gaps	q-start	q-end	hit-start	hit-end	evalue	bitscore		NewCorrectedForAL	New QC calculation for the composite variable based on the summation of hits across the majority of the contig's length
NorthernBobwhiteSimpleDeNovoContig_13159	ref|NW_002198282.1|	85.54	19963	2283	604	1352	21004	25359852	25379520	0	22759		TopEvalCorrectedForAL	Original value of the composite variable constructed for alignment data corresponding to only the Top Evalue Hit
NorthernBobwhiteSimpleDeNovoContig_13159	ref|NW_002198282.1|	70.89	1319	261	123	21116	22393	25379691	25380927	3e-173	614		Notes	Achieving a smaller value for the new composite variable only validates the original outlier status (i.e., exacerbates the outlier status even further)
NorthernBobwhiteSimpleDeNovoContig_13159	ref|NW_002198282.1|	75.65	887	163	53	23822	24683	25382597	25383455	4e-159	571
NorthernBobwhiteSimpleDeNovoContig_13159	ref|NW_002198282.1|	82.63	357	53	9	22664	23011	25381130	25381486	1e-96	363
NorthernBobwhiteSimpleDeNovoContig_13159	ref|NW_002198282.1|	71.7	728	168	38	109	808	25358555	25359272	8e-92	347
NorthernBobwhiteSimpleDeNovoContig_13159	ref|NW_002198282.1|	67.24	586	138	54	24821	25387	25383655	25384205	7e-42	181
Sum Matches bp		Sum AlignLength-->	23840
17076.4		NewCorrectedForAL	3.50016e-05
935.039		TopEvalCorrectedForAL	4.28493e-05
671.016		Contig Size	25426
294.989
521.976
394.026
19893.4
19893	rounded
Query 2	Hit/Subject Chromosome	%ID	AlignLength	Mismatches	Gaps	q-start	q-end	hit-start	hit-end	evalue	bitscore
NorthernBobwhiteSimpleDeNovoContig_51931	ref|NW_002198507.1|	68.79	12366	2473	1387	478	12104	2513716	2501999	0	4390
NorthernBobwhiteSimpleDeNovoContig_51931	ref|NW_002198507.1|	72.26	1204	223	111	15160	16292	2499707	2498544	1e-174	621
NorthernBobwhiteSimpleDeNovoContig_51931	ref|NW_002198507.1|	73.24	213	51	6	13547	13753	2501353	1501141	1e-23	120
NorthernBobwhiteSimpleDeNovoContig_51931	ref|NW_002198507.1|	65.18	382	90	43	12425	12778	2501914	2501548	2e-07	66.2
NorthernBobwhiteSimpleDeNovoContig_51931	ref|NW_002198507.1|	71.33	143	28	13	191	322	2514031	2513891	2513891	62.6
NorthernBobwhiteSimpleDeNovoContig_51931	ref|NW_002198507.1|	66.36	321	75	33	14416	14721	2500501	2500199	3e-05	59
Sum Matches bp		Sum AlignLength-->	14629
8506.57		NewCorrectedForAL	4.71806e-05
870.01		TopEvalCorrectedForAL	5.56283e-05
156.001		Contig Size	16292
248.988
102.002
213.016
10096.6
10097	rounded
Query 3	Hit/Subject Chromosome	%ID	AlignLength	Mismatches	Gaps	q-start	q-end	hit-start	hit-end	evalue	bitscore
NorthernBobwhiteSimpleDeNovoContig_25364	ref|NW_002198595.1|	71.32	12757	2549	1110	4652	16764	5345978	5333688	0	6194
NorthernBobwhiteSimpleDeNovoContig_25364	ref|NW_002198595.1|	76.47	1959	367	94	24673	26588	5327654	5325747	0	1377
NorthernBobwhiteSimpleDeNovoContig_25364	ref|NW_002198595.1|	69.53	3252	649	342	26850	29902	5325442	5322334	0	1335
NorthernBobwhiteSimpleDeNovoContig_25364	ref|NW_002198595.1|	76.24	1229	221	71	19368	20559	5331177	5329983	0	879
NorthernBobwhiteSimpleDeNovoContig_25364	ref|NW_002198595.1|	78.03	824	139	42	1174	1980	5350339	5349541	3e-180	641
NorthernBobwhiteSimpleDeNovoContig_25364	ref|NW_002198595.1|	74.49	1035	187	77	17866	18864	5332836	5331843	1e-173	619
NorthernBobwhiteSimpleDeNovoContig_25364	ref|NW_002198595.1|	80.85	590	98	15	33939	34522	5318859	5318279	1e-174	533
NorthernBobwhiteSimpleDeNovoContig_25364	ref|NW_002198595.1|	69.91	1017	193	113	3106	4085	5347667	5346727	2e-126	462
NorthernBobwhiteSimpleDeNovoContig_25364	ref|NW_002198595.1|	68.89	1247	263	125	21674	22876	5329116	5327951	6e-120	441
NorthernBobwhiteSimpleDeNovoContig_25364	ref|NW_002198595.1|	87.41	286	33	3	34739	35021	5318071	5317786	2e-93	352
NorthernBobwhiteSimpleDeNovoContig_25364	ref|NW_002198595.1|	70.79	801	166	68	275	1035	5352143	5351371	1e-91	347
NorthernBobwhiteSimpleDeNovoContig_25364	ref|NW_002198595.1|	71.12	741	149	65	32287	33007	5319894	5319199	2e-89	340
NorthernBobwhiteSimpleDeNovoContig_25364	ref|NW_002198595.1|	76.54	324	59	17	20908	21226	5329819	5329508	2e-56	230
NorthernBobwhiteSimpleDeNovoContig_25364	ref|NW_002198595.1|	67.72	474	99	54	30405	30855	5321755	5321313	4e-34	156
NorthernBobwhiteSimpleDeNovoContig_25364	ref|NW_002206168.1|	71.3	1791	361	153	29052	30770	1729	20	0	866
Sum Matches bp		Sum AlignLength-->	28327
9098.29		NewCorrectedForAL	2.54792e-05
1498.05		TopEvalCorrectedForAL	5.59066e-05
2261.12		Contig Size	35248
936.99
642.967
770.971
477.015
710.985
859.058
249.993
567.028
526.999
247.99
320.993
1276.98
20445.4
20445	rounded
Query 4	Hit/Subject Chromosome	%ID	AlignLength	Mismatches	Gaps	q-start	q-end	hit-start	hit-end	evalue	bitscore
NorthernBobwhiteSimpleDeNovoContig_61326	ref|NW_002199037.1|	75.64	12930	2285	865	3638	16052	727799	740378	0	8882
NorthernBobwhiteSimpleDeNovoContig_61326	ref|NW_002199037.1|	79.88	1948	281	111	24346	26210	750041	751960	0	1689
NorthernBobwhiteSimpleDeNovoContig_61326	ref|NW_002199037.1|	77.35	2022	382	76	20279	22259	745733	747719	0	1507
NorthernBobwhiteSimpleDeNovoContig_61326	ref|NW_002199037.1|	79.83	1299	195	67	17261	18514	742302	743578	0	1164
NorthernBobwhiteSimpleDeNovoContig_61326	ref|NW_002199037.1|	72.23	1916	387	145	1475	3313	725642	727489	0	980
NorthernBobwhiteSimpleDeNovoContig_61326	ref|NW_002199037.1|	73.85	1419	242	129	15823	17169	740912	742273	0	845
NorthernBobwhiteSimpleDeNovoContig_61326	ref|NW_002199037.1|	85.73	701	86	14	2	698	723422	724112	0	794
NorthernBobwhiteSimpleDeNovoContig_61326	ref|NW_002199037.1|	81.7	694	107	20	23334	24026	749146	749820	0	657
NorthernBobwhiteSimpleDeNovoContig_61326	ref|NW_002199037.1|	77.83	866	148	44	19282	20124	744223	745067	0	646
Sum Matches bp		Sum AlignLength-->	23795
9780.25		NewCorrectedForAL	3.21634e-05
1556.06		TopEvalCorrectedForAL	5.84996e-05
1564.02		Contig Size	26259
1036.99
1383.93
1047.93
600.967
566.998
674.008
18211.2
18211	rounded
Query 5	Hit/Subject Chromosome	%ID	AlignLength	Mismatches	Gaps	q-start	q-end	hit-start	hit-end	evalue	bitscore
NorthernBobwhiteSimpleDeNovoContig_136	ref|NC_007897.1|	78.82	13285	2507	306	3555	16677	18	13158	0	10947
NorthernBobwhiteSimpleDeNovoContig_136	ref|NC_007897.1|	75.67	2343	532	38	44	2362	13228	15556	0	1595
Sum Matches bp		Sum AlignLength-->	15628
10471.2		NewCorrectedForAL	5.01322e-05
1772.95		TopEvalCorrectedForAL	5.93301e-05
12244.2		Contig Size	16703
12244	rounded
Query 6	Hit/Subject Chromosome	%ID	AlignLength	Mismatches	Gaps	q-start	q-end	hit-start	hit-end	evalue	bitscore
NorthernBobwhiteSimpleDeNovoContig_10989	ref|NW_002197691.1|	86.8	14347	1575	319	2716	16892	4645334	4631137	0	17252
NorthernBobwhiteSimpleDeNovoContig_10989	ref|NW_002197691.1|	73.37	492	96	35	2079	2562	4643273	4645809	7e-65	257
NorthernBobwhiteSimpleDeNovoContig_10989	ref|NW_002197691.1|	72.81	331	61	29	266	570	4648864	4648537	1e-36	163
NorthernBobwhiteSimpleDeNovoContig_10989	ref|NW_002197691.1|	68.56	264	77	6	3	264	35093865	35094124	5e-16	95.1
Sum Matches bp		Sum AlignLength-->	15434
12453.2		NewCorrectedForAL	5.55648e-05
360.98		TopEvalCorrectedForAL	6.05005e-05
241.001		Contig Size	17835
180.998
13236.2
13236	rounded
Query 7	Hit/Subject Chromosome	%ID	AlignLength	Mismatches	Gaps	q-start	q-end	hit-start	hit-end	evalue	bitscore
NorthernBobwhiteSimpleDeNovoContig_80615	ref|NW_002199037.1|	75.98	12499	2197	805	3734	15757	755923	768061	0	8700
NorthernBobwhiteSimpleDeNovoContig_80615	ref|NW_002199037.1|	71.22	1480	275	151	1584	3003	753756	755144	0	722
NorthernBobwhiteSimpleDeNovoContig_80615	ref|NW_002199037.1|	74.8	381	66	30	800	1175	752997	753352	2e-64	255
Sum Matches bp		Sum AlignLength-->	14360
9496.74		NewCorrectedForAL	5.25485e-05
1054.06		TopEvalCorrectedForAL	6.07889e-05
284.988		Contig Size	15823
10835.8
10836	rounded
Query 8	Hit/Subject Chromosome	%ID	AlignLength	Mismatches	Gaps	q-start	q-end	hit-start	hit-end	evalue	bitscore
NorthernBobwhiteSimpleDeNovoContig_36366	ref|NW_002198282.1|	77.77	12620	1902	903	2598	15762	25455988	25443817	0	10053
NorthernBobwhiteSimpleDeNovoContig_36366	ref|NW_002198282.1|	86.2	3956	423	123	15974	19842	25443681	25439762	0	4612
NorthernBobwhiteSimpleDeNovoContig_36366	ref|NW_002198282.1|	66.31	2496	580	261	958	3258	25458512	25456083	0	670
NorthernBobwhiteSimpleDeNovoContig_36366	ref|NW_002198282.1|	71.8	234	52	14	612	831	25458783	25458550	6e-22	114
Sum Matches bp		Sum AlignLength-->	19306
9814.57		NewCorrectedForAL	4.03733e-05
3410.07		TopEvalCorrectedForAL	6.16244e-05
1655.1		Contig Size	19871
168.012
15047.8
15048	rounded
Query 9	Hit/Subject Chromosome	%ID	AlignLength	Mismatches	Gaps	q-start	q-end	hit-start	hit-end	evalue	bitscore
NorthernBobwhiteSimpleDeNovoContig_10052	ref|NW_002198919.1|	73.67	11845	2117	1002	1870	13194	944364	933002	0	6949
NorthernBobwhiteSimpleDeNovoContig_10052	ref|NW_002198919.1|	70.04	1362	284	124	490	1806	945883	944601	4e-162	580
Sum Matches bp		Sum AlignLength-->	13207
8726.21		NewCorrectedForAL	5.54967e-05
953.945		TopEvalCorrectedForAL	6.2195e-05
9680.16		Contig Size	14260
9680	rounded
Query 10	Hit/Subject Chromosome	%ID	AlignLength	Mismatches	Gaps	q-start	q-end	hit-start	hit-end	evalue	bitscore
	ref|NW_002198282.1|	75.86	12028	2073	831	1261	12882	20287339	20275737	0	8157
NorthernBobwhiteSimpleDeNovoContig_79692	ref|NW_002198282.1|	83.91	957	126	28	80	1024	20288724	20287784	0	1007
Sum Matches bp		Sum AlignLength-->	12985
9124.44		NewCorrectedForAL	5.88754e-05
803.019		TopEvalCorrectedForAL	6.30695e-05
9927.46		Contig Size	12988
9927	rounded
Query 11	Hit/Subject Chromosome	%ID	AlignLength	Mismatches	Gaps	q-start	q-end	hit-start	hit-end	evalue	bitscore
NorthernBobwhiteSimpleDeNovoContig_22640	ref|NW_002198269.1|	71.89	10935	2140	934	10701	21034	17700740	17690139	0	5559
NorthernBobwhiteSimpleDeNovoContig_22640	ref|NW_002198269.1|	71.55	3294	657	280	21097	24226	17689016	17685839	0	1613
NorthernBobwhiteSimpleDeNovoContig_22640	ref|NW_002198269.1|	74.65	1712	277	157	5601	7228	17706064	17704426	0	1047
NorthernBobwhiteSimpleDeNovoContig_22640	ref|NW_002198269.1|	67.57	2559	633	197	8190	10635	17703223	1770749	0	753
NorthernBobwhiteSimpleDeNovoContig_22640	ref|NW_002198269.1|	74	1100	230	56	26352	27420	17683367	17682293	0	677
NorthernBobwhiteSimpleDeNovoContig_22640	ref|NW_002198269.1|	69.03	1411	280	157	2922	4260	17708736	1777411	5e-158	567
NorthernBobwhiteSimpleDeNovoContig_22640	ref|NW_002198269.1|	80.97	494	69	25	4582	5068	17706542	17706067	4e-128	468
NorthernBobwhiteSimpleDeNovoContig_22640	ref|NW_002198269.1|	76.41	585	90	48	766	1318	17710582	17710014	3e-117	432
NorthernBobwhiteSimpleDeNovoContig_22640	ref|NW_002198269.1|	77.21	531	95	26	27557	28068	17681504	17680981	2e-106	396
NorthernBobwhiteSimpleDeNovoContig_22640	ref|NW_002198269.1|	63.96	1379	313	184	24513	25778	17684689	17683382	1e-51	214
NorthernBobwhiteSimpleDeNovoContig_22640	ref|NW_002198269.1|	67.45	341	60	51	418	708	17711493	17711154	4e-26	129
Sum Matches bp		Sum AlignLength-->	24341
7861.17		NewCorrectedForAL	2.93375e-05
2356.86		TopEvalCorrectedForAL	6.5743e-05
1278.01		Contig Size	28068
1729.12
814
974.013
399.992
446.998
409.985
882.008
230.005
17382.2
17382	rounded
Query 12	Hit/Subject Chromosome	%ID	AlignLength	Mismatches	Gaps	q-start	q-end	hit-start	hit-end	evalue	bitscore
NorthernBobwhiteSimpleDeNovoContig_47261	ref|NW_002198634.1|	71.82	10842	2152	903	607	11058	8161891	8172219	0	5642
NorthernBobwhiteSimpleDeNovoContig_47261	ref|NW_002198634.1|	73.07	2733	541	195	11386	14007	8172343	8174991	0	1543
NorthernBobwhiteSimpleDeNovoContig_47261	ref|NW_002198634.1|	74.22	2161	410	147	14735	16817	8176086	8178177	0	1352
NorthernBobwhiteSimpleDeNovoContig_47261	ref|NW_002198634.1|	78.76	612	107	23	20420	21019	8181839	8182439	1e-138	502
NorthernBobwhiteSimpleDeNovoContig_47261	ref|NW_002198634.1|	74.28	486	88	37	17061	17526	8178566	8179034	1e-75	293
NorthernBobwhiteSimpleDeNovoContig_47261	ref|NW_002198634.1|	70.55	635	143	44	19536	20131	8180948	8181577	6e-73	284
NorthernBobwhiteSimpleDeNovoContig_47261	ref|NW_002198634.1|	74.95	467	74	43	14166	14615	8175647	8176087	2e-72	282
NorthernBobwhiteSimpleDeNovoContig_47261	ref|NW_002198634.1|	70.19	681	124	79	17678	18304	8179659	8180314	8e-72	280
NorthernBobwhiteSimpleDeNovoContig_47261	ref|NW_002198634.1|	69.69	584	125	52	15	567	8160491	8161053	1e-63	253
Sum Matches bp		Sum AlignLength-->	19201
7786.72		NewCorrectedForAL	3.77402e-05
1997		TopEvalCorrectedForAL	6.62424e-05
1603.89		Contig Size	21047
482.011
361.001
447.993
350.017
477.994
406.99
13913.6
13914	rounded
Query 13	Hit/Subject Chromosome	%ID	AlignLength	Mismatches	Gaps	q-start	q-end	hit-start	hit-end	evalue	bitscore
NorthernBobwhiteSimpleDeNovoContig_37709	ref|NW_002197559.1|	76.11	11416	1925	802	5588	16584	11426277	11415245	0	7988
NorthernBobwhiteSimpleDeNovoContig_37709	ref|NW_002197559.1|	71.11	5497	1133	455	12	5266	11432327	11427044	0	2623
NorthernBobwhiteSimpleDeNovoContig_37709	ref|NW_002197559.1|	76.37	783	145	40	16327	17089	11414750	11413988	2e-153	551
Sum Matches bp		Sum AlignLength-->	17696
8688.72		NewCorrectedForAL	4.21398e-05
3908.92		TopEvalCorrectedForAL	6.66696e-05
597.977		Contig Size	17283
13195.6
13196	rounded
Query 14	Hit/Subject Chromosome	%ID	AlignLength	Mismatches	Gaps	q-start	q-end	hit-start	hit-end	evalue	bitscore
NorthernBobwhiteSimpleDeNovoContig_42610	ref|NW_002199037.1|	73.25	10922	2016	906	2544	13010	786827	797297	0	6235
NorthernBobwhiteSimpleDeNovoContig_42610	ref|NW_002199037.1|	74.81	6601	1146	517	13555	19857	797361	803742	0	4255
NorthernBobwhiteSimpleDeNovoContig_42610	ref|NW_002199037.1|	74.14	5666	1020	445	27112	32578	811228	816647	0	3519
NorthernBobwhiteSimpleDeNovoContig_42610	ref|NW_002199037.1|	79.23	3452	500	217	22365	25704	806427	809773	0	2955
NorthernBobwhiteSimpleDeNovoContig_42610	ref|NW_002199037.1|	77.56	2536	426	143	1	2466	784353	786815	0	1984
NorthernBobwhiteSimpleDeNovoContig_42610	ref|NW_002199037.1|	69.84	1333	272	130	20699	21927	804772	806078	6e-164	587
Sum Matches bp		Sum AlignLength-->	30510
8000.37		NewCorrectedForAL	2.44634e-05
4938.21		TopEvalCorrectedForAL	6.70665e-05
4200.77		Contig Size	32702
2735.02
1966.92
930.967
22772.3
22772	rounded
Query 15	Hit/Subject Chromosome	%ID	AlignLength	Mismatches	Gaps	q-start	q-end	hit-start	hit-end	evalue	bitscore
NorthernBobwhiteSimpleDeNovoContig_14488	ref|NW_002198504.1|	75.27	11194	1918	850	19497	30301	2890262	2879530	0	7523
NorthernBobwhiteSimpleDeNovoContig_14488	ref|NW_002198504.1|	77.21	4933	771	353	14741	19447	2895318	2890513	0	3800
NorthernBobwhiteSimpleDeNovoContig_14488	ref|NW_002198504.1|	75.84	5253	888	381	7660	12744	2902984	2897945	0	3721
NorthernBobwhiteSimpleDeNovoContig_14488	ref|NW_002198504.1|	78.45	3856	665	166	50	3807	2911275	2907488	0	3131
NorthernBobwhiteSimpleDeNovoContig_14488	ref|NW_002198504.1|	76.49	2777	516	137	4786	7498	2905911	2903208	0	1994
NorthernBobwhiteSimpleDeNovoContig_14488	ref|NW_002198504.1|	79.02	1025	139	76	31194	32215	2878464	2877513	0	890
NorthernBobwhiteSimpleDeNovoContig_14488	ref|NW_002198504.1|	87.03	617	73	7	13885	14496	2895604	2895890	0	740
Sum Matches bp		Sum AlignLength-->	29655
8425.72		NewCorrectedForAL	2.58284e-05
3808.77		TopEvalCorrectedForAL	6.72414e-05
3983.88		Contig Size	32220
3025.03
2124.13
809.955
536.975
22714.5
22714	rounded
Query 16	Hit/Subject Chromosome	%ID	AlignLength	Mismatches	Gaps	q-start	q-end	hit-start	hit-end	evalue	bitscore
NorthernBobwhiteSimpleDeNovoContig_4881	ref|NW_002198983.1|	73.86	10842	1957	877	795	11155	3257228	3246783	0	6652
NorthernBobwhiteSimpleDeNovoContig_4881	ref|NW_002198983.1|	72.16	4074	845	289	15713	19591	3242287	3238308	0	2107
NorthernBobwhiteSimpleDeNovoContig_4881	ref|NW_002198983.1|	68.71	2627	534	288	13068	15579	3244796	3242343	0	985
NorthernBobwhiteSimpleDeNovoContig_4881	ref|NW_002198983.1|	69.41	729	149	74	11807	12482	3246007	3245300	6e-79	304
NorthernBobwhiteSimpleDeNovoContig_4881	ref|NW_002198983.1|	67.73	626	127	75	149	747	3257921	3257344	2e-53	219
Sum Matches bp		Sum AlignLength-->	18898
8007.9		NewCorrectedForAL	3.83133e-05
2939.8		TopEvalCorrectedForAL	6.8124e-05
1805.01		Contig Size	19841
505.999
423.99
13682.7
13683	rounded
Query 17	Hit/Subject Chromosome	%ID	AlignLength	Mismatches	Gaps	q-start	q-end	hit-start	hit-end	evalue	bitscore
NorthernBobwhiteSimpleDeNovoContig_159316	ref|NW_002198918.1|	72.8	10635	1942	951	125	10332	12274483	10332	0	5858
Sum Matches bp		Sum AlignLength-->	10635
7742.28		NewCorrectedForAL	NA
7742	rounded	TopEvalCorrectedForAL	6.84532e-05
		Contig Size	10436
Query 18	Hit/Subject Chromosome	%ID	AlignLength	Mismatches	Gaps	q-start	q-end	hit-start	hit-end	evalue	bitscore
NorthernBobwhiteSimpleDeNovoContig_32397	ref|NW_002198506.1|	75.04	10915	1872	852	8204	18687	16160388	16149895	0	7108
NorthernBobwhiteSimpleDeNovoContig_32397	ref|NW_002198506.1|	76.19	3600	645	212	75	3575	16168462	16164976	0	2527
NorthernBobwhiteSimpleDeNovoContig_32397	ref|NW_002198506.1|	77.23	1910	307	128	6072	7936	16162409	16160583	0	1406
NorthernBobwhiteSimpleDeNovoContig_32397	ref|NW_002198506.1|	81.77	883	123	38	4967	5843	16163443	16162593	0	838
NorthernBobwhiteSimpleDeNovoContig_32397	ref|NW_002198506.1|	75.81	1017	162	84	3713	4686	16164847	16163872	0	706
NorthernBobwhiteSimpleDeNovoContig_32397	ref|NW_002198506.1|	70.24	578	126	46	18920	19473	16149582	16149027	1e-61	246
Sum Matches bp		Sum AlignLength-->	18903
8190.62		NewCorrectedForAL	4.00422e-05
2742.84		TopEvalCorrectedForAL	6.87494e-05
1475.09		Contig Size	19497
722.029
770.988
405.987
14307.6
14308	rounded
Query 19	Hit/Subject Chromosome	%ID	AlignLength	Mismatches	Gaps	q-start	q-end	hit-start	hit-end	evalue	bitscore
NorthernBobwhiteSimpleDeNovoContig_58279	ref|NW_002198757.1|	70.82	10294	2169	835	8865	18723	34156306	34146413	0	4661
NorthernBobwhiteSimpleDeNovoContig_58279	ref|NW_002198757.1|	73.31	2896	596	177	4576	7365	34160923	34158099	0	1591
NorthernBobwhiteSimpleDeNovoContig_58279	ref|NW_002198757.1|	71.42	1984	431	136	913	2817	34165751	34163825	0	969
NorthernBobwhiteSimpleDeNovoContig_58279	ref|NW_002198757.1|	70.58	1278	277	99	2895	4110	34163434	34162194	5e-137	497
NorthernBobwhiteSimpleDeNovoContig_58279	ref|NW_002198757.1|	66.31	849	206	80	7885	8709	34157364	34156572	7e-47	197
Sum Matches bp		Sum AlignLength-->	17301
7290.21		NewCorrectedForAL	4.10758e-05
2123.06		TopEvalCorrectedForAL	6.87974e-05
1416.97		Contig Size	19384
902.012
562.972
12295.2
12295	rounded
Query 20	Hit/Subject Chromosome	%ID	AlignLength	Mismatches	Gaps	q-start	q-end	hit-start	hit-end	evalue	bitscore
NorthernBobwhiteSimpleDeNovoContig_91360	ref|NW_002198282.1|	74.23	10719	1993	769	1641	11929	34611086	34600707	0	6531
NorthernBobwhiteSimpleDeNovoContig_91360	ref|NW_002198282.1|	71.18	1218	224	127	119	1296	34612919	34611789	5e-169	603
Sum Matches bp		Sum AlignLength-->	11937
7956.71		NewCorrectedForAL	6.19263e-05
866.972		TopEvalCorrectedForAL	6.92509e-05
8823.69		Contig Size	11944
8824	rounded
Query 21	Hit/Subject Chromosome	%ID	AlignLength	Mismatches	Gaps	q-start	q-end	hit-start	hit-end	evalue	bitscore
NorthernBobwhiteSimpleDeNovoContig_121848	ref|NW_002197555.1|	74.48	10379	1948	701	3749	13733	463923	453852	0	6506
NorthernBobwhiteSimpleDeNovoContig_121848	ref|NW_002197555.1|	70.11	3603	702	375	55	3478	467346	463940	0	1620
Sum Matches bp		Sum AlignLength-->	13982
7730.28		NewCorrectedForAL	5.24613e-05
2526.06		TopEvalCorrectedForAL	7.17603e-05
10256.3		Contig Size	13864
10256	rounded
Query 22	Hit/Subject Chromosome	%ID	AlignLength	Mismatches	Gaps	q-start	q-end	hit-start	hit-end	evalue	bitscore
NorthernBobwhiteSimpleDeNovoContig_82559	ref|NW_002198841.1|	74.7	10388	1879	749	8	9961	9493354	9483282	0	6565
NorthernBobwhiteSimpleDeNovoContig_82559	ref|NW_002198841.1|	70.25	3570	714	348	10732	14113	9481627	9478218	0	1590
Sum Matches bp		Sum AlignLength-->	13958
7759.84		NewCorrectedForAL	5.27035e-05
2507.93		TopEvalCorrectedForAL	7.19099e-05
10267.8		Contig Size	14979
10268	rounded
Query 23	Hit/Subject Chromosome	%ID	AlignLength	Mismatches	Gaps	q-start	q-end	hit-start	hit-end	evalue	bitscore
NorthernBobwhiteSimpleDeNovoContig_16479	ref|NW_002198282.1	70.04	9697	1981	924	574	9696	10456615	10447269	0	4177
NorthernBobwhiteSimpleDeNovoContig_16479	ref|NW_002198282.2	73.72	6442	1243	450	9934	16122	10447088	10440844	0	3804
NorthernBobwhiteSimpleDeNovoContig_16479	ref|NW_002198282.3	85.06	1212	162	19	16492	17697	10440740	10439542	0	1342
Sum Matches bp		Sum AlignLength-->	17351
6791.78		NewCorrectedForAL	4.17595e-05
4749.04		TopEvalCorrectedForAL	7.22285e-05
1030.93		Contig Size	17697
12571.7
12572	rounded
Query 24	Hit/Subject Chromosome	%ID	AlignLength	Mismatches	Gaps	q-start	q-end	hit-start	hit-end	evalue	bitscore
NorthernBobwhiteSimpleDeNovoContig_15322	ref|NW_002198757.1|	76.03	10459	1791	716	14029	24101	9543603	9553731	0	7272
NorthernBobwhiteSimpleDeNovoContig_15322	ref|NW_002198757.1|	78.83	4142	640	237	9067	13064	9538020	9542068	0	3400
NorthernBobwhiteSimpleDeNovoContig_15322	ref|NW_002198757.1|	70.22	5923	1225	539	26242	31899	9555916	9561564	0	2619
NorthernBobwhiteSimpleDeNovoContig_15322	ref|NW_002198757.1|	70.72	4965	989	465	34973	39739	9566104	9570801	0	2264
NorthernBobwhiteSimpleDeNovoContig_15322	ref|NW_002198757.1|	76	2058	357	137	32486	34429	9562989	9565023	0	1451
NorthernBobwhiteSimpleDeNovoContig_15322	ref|NW_002198757.1|	75.71	1906	331	132	94	1957	9529283	9531098	0	1342
NorthernBobwhiteSimpleDeNovoContig_15322	ref|NW_002198757.1|	74.63	2010	346	164	6919	8858	9536014	9537929	0	1297
NorthernBobwhiteSimpleDeNovoContig_15322	ref|NW_002198757.1|	73.56	1857	342	149	24128	25881	9553838	9555648	0	1103
NorthernBobwhiteSimpleDeNovoContig_15322	ref|NW_002198757.1|	75.96	1069	179	78	5713	6748	9534559	9535582	0	722
NorthernBobwhiteSimpleDeNovoContig_15322	ref|NW_002198757.1|	68.71	1553	336	150	2113	3614	9531641	9533094	1e-154	556
NorthernBobwhiteSimpleDeNovoContig_15322	ref|NW_002198757.1|	79.5	600	97	26	13387	13981	9542918	9543496	7e-133	484
NorthernBobwhiteSimpleDeNovoContig_15322	ref|NW_002198757.1|	67.16	941	209	100	31547	32432	9561972	9562867	7e-76	295
Sum Matches bp		Sum AlignLength-->	37483
7951.98		NewCorrectedForAL	1.97505e-05
3265.14		TopEvalCorrectedForAL	7.26934e-05
4159.13		Contig Size	40123
3511.25
1564.08
1443.03
1500.06
1366.01
812.012
1067.07
477
631.976
27748.7
27749	rounded
Query 25	Hit/Subject Chromosome	%ID	AlignLength	Mismatches	Gaps	q-start	q-end	hit-start	hit-end	evalue	bitscore
NorthernBobwhiteSimpleDeNovoContig_123692	ref|NW_002197395.1|	78	10681	1624	726	2312	12532	4769046	4758632	0	8379
NorthernBobwhiteSimpleDeNovoContig_123692	ref|NW_002197395.1|	80.76	1502	183	106	168	1633	4771294	4769863	0	1330
NorthernBobwhiteSimpleDeNovoContig_123692	ref|NW_002197395.1|	68.35	1071	228	111	12587	13612	4757656	4756652	4e-105	390
NorthernBobwhiteSimpleDeNovoContig_123692	ref|NW_002197395.1|	75.44	342	69	15	13817	14152	4756109	4755777	2e-59	239
NorthernBobwhiteSimpleDeNovoContig_123692	ref|NW_002197395.1|	72.14	280	62	16	14290	14559	4754487	4754214	1e-28	136
Sum Matches bp		Sum AlignLength-->	13876
8331.18		NewCorrectedForAL	5.57589e-05
1213.02		TopEvalCorrectedForAL	7.30269e-05
732.029		Contig Size	14560
258.005
201.992
10736.2
10736	rounded
Query 26	Hit/Subject Chromosome	%ID	AlignLength	Mismatches	Gaps	q-start	q-end	hit-start	hit-end	evalue	bitscore
NorthernBobwhiteSimpleDeNovoContig_89827	ref|NW_002198757.1|	73.07	9985	1888	801	8293	17847	40345566	40335953	0	5488
NorthernBobwhiteSimpleDeNovoContig_89827	ref|NW_002198757.1|	73.98	953	184	64	4360	5629	40350165	40348912	0	755
NorthernBobwhiteSimpleDeNovoContig_89827	ref|NW_002198757.1|	70.15	1551	329	134	1089	2590	40353536	40352071	3e-171	610
NorthernBobwhiteSimpleDeNovoContig_89827	ref|NW_002198757.1|	73.31	708	133	56	6498	7167	40347575	40346886	4e-113	417
NorthernBobwhiteSimpleDeNovoContig_89827	ref|NW_002198757.1|	74.62	390	83	16	2621	2996	40351489	40351102	1e-62	250
NorthernBobwhiteSimpleDeNovoContig_89827	ref|NW_002198757.1|	71.59	454	92	37	3	449	40355003	40354580	2e-58	235
NorthernBobwhiteSimpleDeNovoContig_89827	ref|NW_002198757.1|	70.91	471	93	44	521	967	40354143	40353693	2e-54	223
NorthernBobwhiteSimpleDeNovoContig_89827	ref|NW_002198757.1|	68.67	498	105	51	5781	6248	40348322	40347846	7e-40	174
Sum Matches bp		Sum AlignLength-->	15010
7296.04		NewCorrectedForAL	4.83799e-05
705.029		TopEvalCorrectedForAL	7.31798e-05
1088.03		Contig Size	17871
519.035
291.018
325.019
333.986
341.977
10900.1
10900	rounded
Query 27	Hit/Subject Chromosome	%ID	AlignLength	Mismatches	Gaps	q-start	q-end	hit-start	hit-end	evalue	bitscore
NorthernBobwhiteSimpleDeNovoContig_561	ref|NW_002198515.1|	72.23	9851	1972	764	481	9883	2998584	2989050	0	5173
NorthernBobwhiteSimpleDeNovoContig_561	ref|NW_002198515.1|	73.1	249	55	12	1	247	2999172	2998934	8e-30	140
NorthernBobwhiteSimpleDeNovoContig_561	ref|NW_002197206.1|	76.88	186	35	8	9933	10111	8787	8603	1e-28	136
Sum Matches bp		Sum AlignLength-->	10286
7115.38		NewCorrectedForAL	7.03202e-05
182.019		TopEvalCorrectedForAL	7.33225e-05
142.997		Contig Size	10119
7440.39
7440	rounded
Query 28	Hit/Subject Chromosome	%ID	AlignLength	Mismatches	Gaps	q-start	q-end	hit-start	hit-end	evalue	bitscore
NorthernBobwhiteSimpleDeNovoContig_12390	ref|NW_002198840.1|	73.16	9957	1812	860	396	9841	7919140	7909533	0	5640
NorthernBobwhiteSimpleDeNovoContig_12390	ref|NW_002198840.1|	66.64	7994	1818	849	9967	17483	7918969	7901348	0	2031
Sum Matches bp		Sum AlignLength-->	17951
7284.54		NewCorrectedForAL	3.91387e-05
5327.2		TopEvalCorrectedForAL	7.34759e-05
12611.7		Contig Size	17579
12612	rounded
Query 29	Hit/Subject Chromosome	%ID	AlignLength	Mismatches	Gaps	q-start	q-end	hit-start	hit-end	evalue	bitscore
NorthernBobwhiteSimpleDeNovoContig_137453	ref|NW_002198757.1|	75.63	10888	2082	571	574	10793	47570353	47580671	0	8284
NorthernBobwhiteSimpleDeNovoContig_137453	ref|NW_002198757.1|	74.1	278	60	12	2	273	47569721	47569992	3e-36	161
Sum Matches bp		Sum AlignLength-->	11166
8234.59		NewCorrectedForAL	6.77016e-05
205.998		TopEvalCorrectedForAL	6.94618e-05
8440.59		Contig Size	10915
8441	rounded
Query 30	Hit/Subject Chromosome	%ID	AlignLength	Mismatches	Gaps	q-start	q-end	hit-start	hit-end	evalue	bitscore
NorthernBobwhiteSimpleDeNovoContig_26513	ref|NW_002198757.1|	84.06	11364	1385	426	3853	14941	30116017	30104805	0	12163
NorthernBobwhiteSimpleDeNovoContig_26513	ref|NW_002198757.1|	73.84	2328	470	139	595	2848	30119399	30117137	0	1362
NorthernBobwhiteSimpleDeNovoContig_26513	ref|NW_002198757.1|	80.77	853	122	42	2917	3756	30116981	30116158	0	783
NorthernBobwhiteSimpleDeNovoContig_26513	ref|NW_002198757.1|	64.13	1224	268	171	15000	16148	30104035	30102908	8e-58	233
Sum Matches bp		Sum AlignLength-->	15769
9552.58		NewCorrectedForAL	5.12544e-05
1719		TopEvalCorrectedForAL	7.39704e-05
688.968		Contig Size	16151
784.951
12745.5
12745	rounded
Query 31	Hit/Subject Chromosome	%ID	AlignLength	Mismatches	Gaps	q-start	q-end	hit-start	hit-end	evalue	bitscore
NorthernBobwhiteSimpleDeNovoContig_3815	ref|NW_002197207.1|	74.38	10053	1873	703	3245	13011	4372105	4362470	0	6185
NorthernBobwhiteSimpleDeNovoContig_3815	ref|NW_002232616.1|	74.51	2597	477	185	467	3017	202	2659	0	1618
Sum Matches bp		Sum AlignLength-->	12650
7477.42		NewCorrectedForAL	5.88167e-05
1935.02		TopEvalCorrectedForAL	7.39879e-05
9412.45		Contig Size	13023
9412	rounded
Query 32	Hit/Subject Chromosome	%ID	AlignLength	Mismatches	Gaps	q-start	q-end	hit-start	hit-end	evalue	bitscore
NorthernBobwhiteSimpleDeNovoContig_10346	ref|NW_002197294.1|	73.42	9924	1738	899	31675	41080	5204759	5195217	0	5912
NorthernBobwhiteSimpleDeNovoContig_10346	ref|NW_002197294.1|	78.17	2840	434	186	47513	50271	5187076	5184342	0	2251
NorthernBobwhiteSimpleDeNovoContig_10346	ref|NW_002197294.1|	74.72	2789	543	162	44267	47002	5190496	5187817	0	1781
NorthernBobwhiteSimpleDeNovoContig_10346	ref|NW_002197294.1|	71.81	3246	726	189	10672	13830	5225567	5222424	0	1597
NorthernBobwhiteSimpleDeNovoContig_10346	ref|NW_002197294.1|	71.38	2792	592	207	27067	29730	5208722	5206010	0	1323
NorthernBobwhiteSimpleDeNovoContig_10346	ref|NW_002197294.1|	77.49	1710	288	97	14715	16347	5220948	5219259	0	1310
NorthernBobwhiteSimpleDeNovoContig_10346	ref|NW_002197294.1|	76.66	1718	318	83	16825	18497	5219130	5217451	0	1243
NorthernBobwhiteSimpleDeNovoContig_10346	ref|NW_002197294.1|	71.95	2467	497	195	24129	26476	5212316	5209926	0	1231
NorthernBobwhiteSimpleDeNovoContig_10346	ref|NW_002197294.1|	71.1	1948	389	174	7126	9007	5229595	5227756	0	951
NorthernBobwhiteSimpleDeNovoContig_10346	ref|NW_002197294.1|	79.51	971	159	40	4839	5797	523340	5232398	0	832
NorthernBobwhiteSimpleDeNovoContig_10346	ref|NW_002197294.1|	75.8	1004	181	62	29820	30811	5205749	5204796	0	695
NorthernBobwhiteSimpleDeNovoContig_10346	ref|NW_002197294.1|	77.03	901	185	22	19109	19997	5217032	5216142	0	648
NorthernBobwhiteSimpleDeNovoContig_10346	ref|NW_002197294.1|	79.83	600	101	20	13955	14551	5221571	5220989	8e-146	527
NorthernBobwhiteSimpleDeNovoContig_10346	ref|NW_002197294.1|	77	674	124	31	2455	3111	5235434	5234775	5e-136	495
NorthernBobwhiteSimpleDeNovoContig_10346	ref|NW_002197294.1|	77.28	669	126	26	1052	1700	5237596	5236934	5e-136	495
NorthernBobwhiteSimpleDeNovoContig_10346	ref|NW_002197294.1|	72.88	815	174	47	21620	22406	5214496	5213701	2e-127	466
NorthernBobwhiteSimpleDeNovoContig_10346	ref|NW_002197294.1|	79.17	552	96	19	18	556	5239127	5238582	1e-123	453
NorthernBobwhiteSimpleDeNovoContig_10346	ref|NW_002197294.1|	68.11	1179	287	89	9524	10644	5226926	5225779	7e-102	381
NorthernBobwhiteSimpleDeNovoContig_10346	ref|NW_002197294.1|	78.59	453	91	6	47039	47487	5187605	5187155	2e-97	367
Sum Matches bp		Sum AlignLength-->	37252
7286.2		NewCorrectedForAL	1.99162e-05
2220.03		TopEvalCorrectedForAL	7.39823e-05
2083.94		Contig Size	50271
2330.95
1992.93
1325.08
1317.02
1775.01
1385.03
772.042
761.032
694.04
478.98
518.98
517.003
593.972
437.018
803.017
356.013
27648.3
27638	rounded
Query 33	Hit/Subject Chromosome	%ID	AlignLength	Mismatches	Gaps	q-start	q-end	hit-start	hit-end	evalue	bitscore
NorthernBobwhiteSimpleDeNovoContig_59810	ref|NW_002198982.1|	74.53	10039	1673	884	3220	12749	5639159	5629496	0	6417
NorthernBobwhiteSimpleDeNovoContig_59810	ref|NW_002198982.1|	84.13	712	88	25	66	774	5642192	5641503	0	765
Sum Matches bp		Sum AlignLength-->	10751
7482.07		NewCorrectedForAL	6.99145e-05
599.006		TopEvalCorrectedForAL	7.42405e-05
8081.07		Contig Size	12749
8081	rounded
Query 34	Hit/Subject Chromosome	%ID	AlignLength	Mismatches	Gaps	q-start	q-end	hit-start	hit-end	evalue	bitscore
NorthernBobwhiteSimpleDeNovoContig_8327	ref|NW_002198510.1|	73.84	9941	1716	885	101	9568	3169961	3160433	0	5921
NorthernBobwhiteSimpleDeNovoContig_8327	ref|NW_002198510.1|	77.61	4217	728	216	10008	14121	3160355	3156252	0	3241
NorthernBobwhiteSimpleDeNovoContig_8327	ref|NW_002198510.1|	73.12	1901	397	114	16136	17962	3152504	3150644	0	1056
NorthernBobwhiteSimpleDeNovoContig_8327	ref|NW_002198510.1|	73.04	1862	365	137	18444	20220	3149479	3147670	0	1020
NorthernBobwhiteSimpleDeNovoContig_8327	ref|NW_002198510.1|	66.51	1950	490	163	14202	16061	3155015	3153139	2e-148	535
Sum Matches bp		Sum AlignLength-->	19871
7340.43		NewCorrectedForAL	3.71274e-05
3272.81		TopEvalCorrectedForAL	7.42782e-05
1390.01		Contig Size	20252
1360
1296.94
14660.2
14660	rounded
Query 35	Hit/Subject Chromosome	%ID	AlignLength	Mismatches	Gaps	q-start	q-end	hit-start	hit-end	evalue	bitscore
NorthernBobwhiteSimpleDeNovoContig_85351	ref|NW_002199038.1|	73.15	9770	1827	796	8369	17743	2544697	253529	0	5519
NorthernBobwhiteSimpleDeNovoContig_85351	ref|NW_002199038.1|	75.75	3567	631	234	2516	5937	2552657	2549180	0	2343
NorthernBobwhiteSimpleDeNovoContig_85351	ref|NW_002199038.1|	85.14	2025	225	76	511	2506	2554874	2552897	0	2282
NorthernBobwhiteSimpleDeNovoContig_85351	ref|NW_002199038.1|	82.72	1377	187	51	7016	8376	2546288	2544947	0	1375
NorthernBobwhiteSimpleDeNovoContig_85351	ref|NW_002199038.1|	77.58	330	47	27	18848	19160	2534328	1534009	5e-67	264
NorthernBobwhiteSimpleDeNovoContig_85351	ref|NW_002199038.1|	68.38	721	154	74	5723	6416	2547169	2547496	2e-65	259
NorthernBobwhiteSimpleDeNovoContig_85351	ref|NW_002199038.1|	71.53	425	88	33	17936	18335	2535330	2534914	3e-45	192
NorthernBobwhiteSimpleDeNovoContig_85351	ref|NW_002199038.1|	76.33	245	53	5	6694	6934	2546768	2546525	3e-39	172
NorthernBobwhiteSimpleDeNovoContig_85351	ref|NW_002199038.1|	83.71	178	15	14	4385	4548	2548345	2548168	6e-35	158
NorthernBobwhiteSimpleDeNovoContig_85351	ref|NW_002199038.1|	72.29	249	54	15	224	458	3383350	3383597	1e-25	127
Sum Matches bp		Sum AlignLength-->	18887
7146.76		NewCorrectedForAL	4.00343e-05
2702		TopEvalCorrectedForAL	7.48721e-05
1724.09		Contig Size	19165
1139.05
256.014
493.02
304.002
187.008
149.004
180.002
14280.9
14281	rounded
Query 36	Hit/Subject Chromosome	%ID	AlignLength	Mismatches	Gaps	q-start	q-end	hit-start	hit-end	evalue	bitscore
NorthernBobwhiteSimpleDeNovoContig_24959	ref|NW_002197832.1|	73.55	9759	1885	696	1136	10572	9297746	9288362	0	5689
NorthernBobwhiteSimpleDeNovoContig_24959	ref|NW_002197832.1|	78.71	1165	167	81	7	1119	9299019	9297884	0	989
NorthernBobwhiteSimpleDeNovoContig_24959	ref|NW_002197832.1|	76.23	1035	193	53	11555	12549	9286064	9285043	0	720
NorthernBobwhiteSimpleDeNovoContig_24959	ref|NW_002197832.1|	64.36	912	212	113	10599	11481	9287124	9286297	3e-49	205
Sum Matches bp		Sum AlignLength-->	12871
7177.74		NewCorrectedForAL	5.71704e-05
916.971		TopEvalCorrectedForAL	7.53663e-05
788.981		Contig Size	12697
586.963
9470.66
9471	rounded
Query 37	Hit/Subject Chromosome	%ID	AlignLength	Mismatches	Gaps	q-start	q-end	hit-start	hit-end	evalue	bitscore
NorthernBobwhiteSimpleDeNovoContig_59816	ref|NW_002197395.1|	71.02	9401	1756	968	2674	11601	7945620	7936715	0	4432
NorthernBobwhiteSimpleDeNovoContig_59816	ref|NW_002197395.1|	82.85	1335	206	23	11877	13198	7936451	7935127	0	1328
NorthernBobwhiteSimpleDeNovoContig_59816	ref|NW_002197395.1|	79.43	812	113	54	1797	2585	7946781	7946001	0	670
NorthernBobwhiteSimpleDeNovoContig_59816	ref|NW_002197395.1|	86.84	547	64	8	13171	13714	7935026	7934485	0	646
NorthernBobwhiteSimpleDeNovoContig_59816	ref|NW_002197395.1|	68.14	474	100	51	741	1179	7948209	7947752	8e-38	167
Sum Matches bp		Sum AlignLength-->	12569
6676.59		NewCorrectedForAL	5.83999e-05
1106.05		TopEvalCorrectedForAL	7.55452e-05
644.972		Contig Size	13768
475.015
322.984
9225.61
9226	rounded
Query 38	Hit/Subject Chromosome	%ID	AlignLength	Mismatches	Gaps	q-start	q-end	hit-start	hit-end	evalue	bitscore
NorthernBobwhiteSimpleDeNovoContig_37555	ref|NW_002197117.1|	78.42	10349	1684	549	1464	11590	13217681	13227702	0	8338
NorthernBobwhiteSimpleDeNovoContig_37555	ref|NW_002197117.1|	74.85	1141	197	90	197	1294	13216381	13217474	0	760
Sum Matches bp		Sum AlignLength-->	11490
8115.69		NewCorrectedForAL	6.79442e-05
854.038		TopEvalCorrectedForAL	7.57754e-05
8969.72		Contig Size	11590
8970	rounded
Query 39	Hit/Subject Chromosome	%ID	AlignLength	Mismatches	Gaps	q-start	q-end	hit-start	hit-end	evalue	bitscore
NorthernBobwhiteSimpleDeNovoContig_12195	ref|NW_002197691.1|	73.42	9673	1836	735	3774	12980	25779956	25789359	0	5633
NorthernBobwhiteSimpleDeNovoContig_12195	ref|NW_002197691.1|	67.47	2973	600	367	256	3092	25776882	25779623	0	991
Sum Matches bp		Sum AlignLength-->	12646
7101.92		NewCorrectedForAL	5.6953e-05
2005.88		TopEvalCorrectedForAL	7.5902e-05
9107.8		Contig Size	13342
9108	rounded
Query 40	Hit/Subject Chromosome	%ID	AlignLength	Mismatches	Gaps	q-start	q-end	hit-start	hit-end	evalue	bitscore
NorthernBobwhiteSimpleDeNovoContig_36940	ref|NW_002198282.1|	72.9	9566	1822	770	1126	10420	23853068	23844002	0	5295
NorthernBobwhiteSimpleDeNovoContig_36940	ref|NW_002198282.1|	71.39	2880	570	254	16830	19557	23836396	23833619	0	1397
NorthernBobwhiteSimpleDeNovoContig_36940	ref|NW_002198282.1|	68.81	3299	718	311	11425	14575	23841392	23838257	0	1297
NorthernBobwhiteSimpleDeNovoContig_36940	ref|NW_002198282.1|	75.59	852	172	36	15382	16209	23837935	23837096	8e-160	572
NorthernBobwhiteSimpleDeNovoContig_36940	ref|NW_002198282.1|	69.68	376	83	31	10837	11195	23841924	23841563	2e-34	156
NorthernBobwhiteSimpleDeNovoContig_36940	ref|NW_002198282.1|	70.37	297	84	4	259	554	23854070	23853777	3e-25	125
NorthernBobwhiteSimpleDeNovoContig_36940	ref|NW_002198282.1|	67.61	355	79	36	587	930	23853609	23853280	7e-15	91.5
Sum Matches bp		Sum AlignLength-->	17625
6973.61		NewCorrectedForAL	4.07384e-05
2056.03		TopEvalCorrectedForAL	7.62074e-05
2270.04		Contig Size	19621
644.027
261.997
208.999
240.016
12654.7
12655	rounded
Query 41	Hit/Subject Chromosome	%ID	AlignLength	Mismatches	Gaps	q-start	q-end	hit-start	hit-end	evalue	bitscore
NorthernBobwhiteSimpleDeNovoContig_28591	ref|NW_002198841.1|	73.71	9659	1920	619	4607	13974	5021368	5030689	0	5692
NorthernBobwhiteSimpleDeNovoContig_28591	ref|NW_002198841.1|	81.21	2373	329	117	14220	16566	5031630	5033911	0	2221
NorthernBobwhiteSimpleDeNovoContig_28591	ref|NW_002198841.1|	81.1	905	113	58	553	1419	5017272	5018156	0	850
NorthernBobwhiteSimpleDeNovoContig_28591	ref|NW_002198841.1|	75.48	1154	237	46	2049	3184	5018999	5020124	0	783
NorthernBobwhiteSimpleDeNovoContig_28591	ref|NW_002198841.1|	75.23	860	154	59	17430	18247	5035093	5035935	2e-154	554
NorthernBobwhiteSimpleDeNovoContig_28591	ref|NW_002198841.1|	74.73	566	125	18	3947	4501	5020798	5021356	5e-92	347
NorthernBobwhiteSimpleDeNovoContig_28591	ref|NW_002198841.1|	75.63	517	108	18	16586	17093	5033991	5034498	2e-91	345
NorthernBobwhiteSimpleDeNovoContig_28591	ref|NW_002198841.1|	71.1	353	87	15	1587	1936	5018417	5018757	7.00e-0.4	154
Sum Matches bp		Sum AlignLength-->	16387
7119.65		NewCorrectedForAL	4.70704e-06
1927.11		TopEvalCorrectedForAL	7.63122e-05
733.955		Contig Size	18248
871.039
646.978
422.972
391.007
250.983
12363.7
1264	rounded
Query 42	Hit/Subject Chromosome	%ID	AlignLength	Mismatches	Gaps	q-start	q-end	hit-start	hit-end	evalue	bitscore
NorthernBobwhiteSimpleDeNovoContig_63170	ref|NW_002198269.1|	76.24	9988	1680	693	8	9647	26151359	26141717	0	7083
Sum Matches bp		Sum AlignLength-->	9988
7614.85		NewCorrectedForAL	NA
7615	rounded	TopEvalCorrectedForAL	7.63316e-05
		Contig Size	9647
Query 43	Hit/Subject Chromosome	%ID	AlignLength	Mismatches	Gaps	q-start	q-end	hit-start	hit-end	evalue	bitscore
NorthernBobwhiteSimpleDeNovoContig_41774	ref|NW_002198637.1|	77.26	10111	1717	582	76	9933	8822473	88322254	0	7609
Sum Matches bp		Sum AlignLength-->	10111
7811.76		NewCorrectedForAL	NA
7812	rounded	TopEvalCorrectedForAL	7.64118e-05
		Contig Size	10235
Query 44	Hit/Subject Chromosome	%ID	AlignLength	Mismatches	Gaps	q-start	q-end	hit-start	hit-end	evalue	bitscore
NorthernBobwhiteSimpleDeNovoContig_28631	ref|NW_002198512.1|	70.27	9196	1950	784	4958	13783	4397319	4388538	0	3977
NorthernBobwhiteSimpleDeNovoContig_28631	ref|NW_002198512.1|	78.7	2319	383	111	22478	24727	4375043	4372767	0	1884
NorthernBobwhiteSimpleDeNovoContig_28631	ref|NW_002198512.1|	71.27	2628	551	204	15204	17751	4385578	4383075	0	1276
NorthernBobwhiteSimpleDeNovoContig_28631	ref|NW_002198512.1|	69.35	2620	591	212	192	1679	440361	4397822	0	1003
NorthernBobwhiteSimpleDeNovoContig_28631	ref|NW_002198512.1|	71.87	999	204	77	20269	21242	4379765	4378819	5e-140	506
NorthernBobwhiteSimpleDeNovoContig_28631	ref|NW_002198512.1|	68.5	1308	345	67	3582	4860	420131	421400	1e-128	468
Sum Matches bp		Sum AlignLength-->	19070
6462.03		NewCorrectedForAL	3.73723e-05
1825.05		TopEvalCorrectedForAL	7.64137e-05
1872.98		Contig Size	28566
1816.97
717.981
895.98
13591
13591	rounded
Query 45	Hit/Subject Chromosome	%ID	AlignLength	Mismatches	Gaps	q-start	q-end	hit-start	hit-end	evalue	bitscore
NorthernBobwhiteSimpleDeNovoContig_3326	ref|NW_002198757.1|	74.58	9722	1669	802	6412	15671	17839240	17829855	0	6168
NorthernBobwhiteSimpleDeNovoContig_3326	ref|NW_002198757.1|	79.73	1095	146	76	313	1367	17847219	17846161	0	930
NorthernBobwhiteSimpleDeNovoContig_3326	ref|NW_002198757.1|	72.28	1713	316	176	1412	3029	17846061	17844430	0	850
NorthernBobwhiteSimpleDeNovoContig_3326	ref|NW_002198757.1|	75.24	618	113	40	3136	3730	17844215	17843615	4e-160	394
NorthernBobwhiteSimpleDeNovoContig_3326	ref|NW_002198757.1|	81.52	276	40	11	4566	4840	17842592	17842327	3e-36	251
NorthernBobwhiteSimpleDeNovoContig_3326	ref|NW_002198757.1|	83.01	213	34	2	2	214	17847468	17847258	2e-52	215
Sum Matches bp		Sum AlignLength-->	13637
7250.67		NewCorrectedForAL	5.50042e-05
873.043		TopEvalCorrectedForAL	7.67126e-05
1238.16		Contig Size	15672
464.983
224.995
176.811
10228.7
10229	rounded
Query 46	Hit/Subject Chromosome	%ID	AlignLength	Mismatches	Gaps	q-start	q-end	hit-start	hit-end	evalue	bitscore
NorthernBobwhiteSimpleDeNovoContig_23126	ref|NW_002198513.1|	76	9899	1621	755	688	10215	2668899	2659385	0	6960
NorthernBobwhiteSimpleDeNovoContig_23126	ref|NW_002198513.1|	69.06	3672	843	293	13787	17294	2654434	2650892	0	1332
NorthernBobwhiteSimpleDeNovoContig_23126	ref|NW_002198513.1|	73.25	2254	414	189	17300	19426	2650182	2647991	0	1310
NorthernBobwhiteSimpleDeNovoContig_23126	ref|NW_002198513.1|	70.03	2002	407	193	20211	22139	2647314	2645433	0	863
NorthernBobwhiteSimpleDeNovoContig_23126	ref|NW_002198513.1|	67.92	1808	399	181	10491	12188	2659157	2647421	3e-160	574
NorthernBobwhiteSimpleDeNovoContig_23126	ref|NW_002198513.1|	76.3	616	99	47	13110	13681	2655687	2655075	1e-125	459
Sum Matches bp		Sum AlignLength-->	20251
7523.24		NewCorrectedForAL	3.61129e-05
2535.88		TopEvalCorrectedForAL	7.67754e-05
1651.06		Contig Size	22144
1402
1227.99
470.008
14810.2
14810	rounded
Query 47	Hit/Subject Chromosome	%ID	AlignLength	Mismatches	Gaps	q-start	q-end	hit-start	hit-end	evalue	bitscore
NorthernBobwhiteSimpleDeNovoContig_19681	ref|NW_002198980.1|	80	40353	7454	617	3158	13119	4802800	4792674	0	8974
NorthernBobwhiteSimpleDeNovoContig_19681	ref|NW_002198980.1|	64.16	929	248	85	1980	2869	4803808	4802926	6e-20	107
NorthernBobwhiteSimpleDeNovoContig_19681	ref|NW_002198980.1|	69.29	241	38	36	27	247	8405030	4804806	1e-15	93.3
Sum matches bp		Sum AlignLength-->	41523
32282.4		NewCorrectedForAL	1.91659e-05
596.046		TopEvalCorrectedForAL	1.9825e-05
166.989		Contig Size	13122
33045.4
33045	rounded
Query 48	Hit/Subject Chromosome	%ID	AlignLength	Mismatches	Gaps	q-start	q-end	hit-start	hit-end	evalue	bitscore
NorthernBobwhiteSimpleDeNovoContig_60440	ref|NW_002197205.1|	76.37	9915	1731	612	2048	11677	1644314	1634727	0	7126
NorthernBobwhiteSimpleDeNovoContig_60440	ref|NW_002197205.1|	79.53	1011	164	43	1	976	1646439	1645437	0	857
NorthernBobwhiteSimpleDeNovoContig_60440	ref|NW_002197205.1|	68.83	231	53	19	1517	1742	1644793	1644577	3e-11	78.8
Sum Matches bp		Sum AlignLength-->	11157
7572.09		NewCorrectedForAL	6.8566e-05
804.048		TopEvalCorrectedForAL	7.70247e-05
158.997		Contig Size	11679
8535.13
8535	rounded
Query 49	Hit/Subject Chromosome	%ID	AlignLength	Mismatches	Gaps	q-start	q-end	hit-start	hit-end	evalue	bitscore
NorthernBobwhiteSimpleDeNovoContig_91692	ref|NW_002198918.1|	68.68	8893	1927	858	2246	10698	7923564	7932038	0	3214
NorthernBobwhiteSimpleDeNovoContig_91692	ref|NW_002198918.1|	72.12	1277	240	116	22	1233	7921104	7922329	0	659
NorthernBobwhiteSimpleDeNovoContig_91692	ref|NW_002198918.1|	69.89	787	165	72	1230	1954	7922416	7923192	4e-91	343
Sum Matches bp		Sum AlignLength-->	10957
6107.71		NewCorrectedForAL	6.3129e-05
920.972		TopEvalCorrectedForAL	7.72293e-05
550.034		Contig Size	11576
7578.72
7579	rounded
Query 50	Hit/Subject Chromosome	%ID	AlignLength	Mismatches	Gaps	q-start	q-end	hit-start	hit-end	evalue	bitscore
NorthernBobwhiteSimpleDeNovoContig_7528	ref|NW_002198840.1|	73.34	9492	1844	687	1	9105	9461159	9470350	0	5434
NorthernBobwhiteSimpleDeNovoContig_7528	ref|NW_002198840.1|	77.68	3782	657	187	19035	22701	9482841	9486550	0	2937
NorthernBobwhiteSimpleDeNovoContig_7528	ref|NW_002198840.1|	93.82	680	41	1	16230	16908	9478502	9479181	0	1034
NorthernBobwhiteSimpleDeNovoContig_7528	ref|NW_002198840.1|	95.55	494	20	2	13985	14478	9475671	9476162	0	785
NorthernBobwhiteSimpleDeNovoContig_7528	ref|NW_002198840.1|	92.97	512	34	2	26096	26605	949140	9490651	0	755
NorthernBobwhiteSimpleDeNovoContig_7528	ref|NW_002198840.1|	72.99	1333	252	108	9397	10680	9470600	9471873	0	738
NorthernBobwhiteSimpleDeNovoContig_7528	ref|NW_002198840.1|	85.68	370	39	14	14886	15250	9477001	9477361	2e-113	419
NorthernBobwhiteSimpleDeNovoContig_7528	ref|NW_002198840.1|	68.88	1070	240	93	11166	12199	9472717	9473729	3e-109	405
NorthernBobwhiteSimpleDeNovoContig_7528	ref|NW_002198840.1|	87.01	331	38	5	17136	17461	9479951	9480281	1e-108	403
NorthernBobwhiteSimpleDeNovoContig_7528	ref|NW_002198840.1|	70.32	775	182	48	18147	18894	9481559	9482312	2e-80	309
Sum Matches bp		Sum AlignLength-->	18839
6961.43		NewCorrectedForAL	4.04189e-05
2937.86		TopEvalCorrectedForAL	7.72651e-05
637.976		Contig Size	26985
472.017
476.006
972.957
317.016
737.016
288.003
544.98
14345.3
14345	rounded
Query 51	Hit/Subject Chromosome	%ID	AlignLength	Mismatches	Gaps	q-start	q-end	hit-start	hit-end	evalue	bitscore
NorthernBobwhiteSimpleDeNovoContig_141786	ref|NW_002197206.1|	76.85	9813	1571	701	4169	13731	4781512	4790873	0	7288
NorthernBobwhiteSimpleDeNovoContig_141786	ref|NW_002197206.1|	77.41	1890	334	93	2304	4158	4779058	4780889	0	1400
NorthernBobwhiteSimpleDeNovoContig_141786	ref|NW_002197206.1|	74.65	1834	347	118	14370	16109	4791298	4793107	0	1187
NorthernBobwhiteSimpleDeNovoContig_141786	ref|NW_002197206.1|	73.32	431	95	20	1780	2209	4778240	4778651	1e-62	250
NorthernBobwhiteSimpleDeNovoContig_141786	ref|NW_002197206.1|	67.08	653	129	86	16338	16923	4793248	4793881	7e-40	174
NorthernBobwhiteSimpleDeNovoContig_141786	ref|NW_002197206.1|	80.85	188	32	4	13724	13909	4790922	4791107	1e-37	167
NorthernBobwhiteSimpleDeNovoContig_141786	ref|NW_002197206.1|	67.3	578	137	52	257	815	4777184	4777728	4e-36	161
NorthernBobwhiteSimpleDeNovoContig_141786	ref|NW_002197206.1|	71.7	318	60	30	1003	1308	4777731	4778030	7e-33	150
Sum Matches bp		Sum AlignLength-->	15705
7541.29		NewCorrectedForAL	4.82309e-05
1463.05		TopEvalCorrectedForAL	7.83145e-05
1369.08		Contig Size	16950
316.009
438.032
151.998
388.994
228.006
11896.5
11896	rounded
Query 52	Hit/Subject Chromosome	%ID	AlignLength	Mismatches	Gaps	q-start	q-end	hit-start	hit-end	evalue	bitscore
NorthernBobwhiteSimpleDeNovoContig_68750	ref|NW_002197742.1|	71.51	9003	1888	677	7867	16588	1300843	1309449	0	4439
NorthernBobwhiteSimpleDeNovoContig_68750	ref|NW_002197742.1|	76.13	2204	434	92	4765	6923	1298009	1300165	0	1519
NorthernBobwhiteSimpleDeNovoContig_68750	ref|NW_002197742.1|	75.64	1363	252	80	3073	4383	1296497	1297231	0	911
NorthernBobwhiteSimpleDeNovoContig_68750	ref|NW_002197742.1|	73.11	528	107	35	2843	3368	1295542	1296036	1e-73	286
NorthernBobwhiteSimpleDeNovoContig_68750	ref|NW_002197742.1|	75.68	370	84	6	3	372	1293158	1293521	1e-62	250
NorthernBobwhiteSimpleDeNovoContig_68750	ref|NW_002197742.1|	73.44	256	55	13	7590	7842	1300511	1300756	3e-31	145
NorthernBobwhiteSimpleDeNovoContig_68750	ref|NW_002197742.1|	78.83	137	24	5	1824	1957	1294282	1294416	1e-18	104
NorthernBobwhiteSimpleDeNovoContig_68750	ref|NW_002197742.1|	79.65	113	20	3	2256	2365	1295064	1295176	4e-17	98.7
NorthernBobwhiteSimpleDeNovoContig_68750	ref|NW_002197742.1|	66	350	88	31	602	930	1293587	1293926	7e-14	87.8
Sum Matches bp		Sum AlignLength-->	14324
6438.05		NewCorrectedForAL	5.08342e-05
1677.91		TopEvalCorrectedForAL	7.94291e-05
1030.97		Contig Size	16591
386.021
280.016
188.006
107.997
90.0045
231
10430
10430	rounded
Query 53	Hit/Subject Chromosome	%ID	AlignLength	Mismatches	Gaps	q-start	q-end	hit-start	hit-end	evalue	bitscore
NorthernBobwhiteSimpleDeNovoContig_12466	ref|NW_002234472.1|	71.15	8922	1759	815	2187	10664	2197938	2206488	0	4228
NorthernBobwhiteSimpleDeNovoContig_12466	ref|NW_002234472.1|	74.67	3111	558	230	11999	15030	2208019	2210978	0	1954
NorthernBobwhiteSimpleDeNovoContig_12466	ref|NW_002234472.1|	87.3	740	57	37	10792	11512	2206710	2207431	0	908
NorthernBobwhiteSimpleDeNovoContig_12466	ref|NW_002234472.1|	75.02	1101	185	90	121	1173	2196441	2197499	0	728
NorthernBobwhiteSimpleDeNovoContig_12466	ref|NW_002234472.1|	70.92	423	101	22	1702	2118	6863577	6863171	1e-41	179
NorthernBobwhiteSimpleDeNovoContig_12466	ref|NW_002234472.1|	72.05	347	82	15	1691	2029	782769	783108	2e-40	176
NorthernBobwhiteSimpleDeNovoContig_12466	ref|NW_002234472.1|	68.39	503	135	24	1632	2120	967591	967099	9e-38	167
Sum Matches bp		Sum AlignLength-->	15147
6348		NewCorrectedForAL	4.81058e-05
2322.98		TopEvalCorrectedForAL	7.97467e-05
646.02		Contig Size	15179
825.97
299.992
250.013
344.002
11037
11037	rounded
Query 54	Hit/Subject Chromosome	%ID	AlignLength	Mismatches	Gaps	q-start	q-end	hit-start	hit-end	evalue	bitscore
NorthernBobwhiteSimpleDeNovoContig_78581	ref|NW_002198757.1|	77.26	9670	1572	627	9961	19214	44240855	44250313	0	7274
NorthernBobwhiteSimpleDeNovoContig_78581	ref|NW_002198757.1|	73.72	10186	2026	651	4	9904	44230812	44240631	0	6040
NorthernBobwhiteSimpleDeNovoContig_78581	ref|NW_002198757.1|	78.53	4117	633	251	24187	28173	44255753	44259748	0	3337
NorthernBobwhiteSimpleDeNovoContig_78581	ref|NW_002198757.1|	81.06	1932	289	77	19910	21799	44251155	44253051	0	1764
NorthernBobwhiteSimpleDeNovoContig_78581	ref|NW_002198757.1|	72.03	1087	228	76	22208	23245	44253372	44254431	1e-159	572
Sum Matches bp		Sum AlignLength-->	26992
7471.04		NewCorrectedForAL	2.82225e-05
7509.12		TopEvalCorrectedForAL	7.98966e-05
3233.08		Contig Size	28189
1566.08
782.966
20562.3
20562	rounded
Query 55	Hit/Subject Chromosome	%ID	AlignLength	Mismatches	Gaps	q-start	q-end	hit-start	hit-end	evalue	bitscore
NorthernBobwhiteSimpleDeNovoContig_109984	ref|NW_002198919.1|	72.21	9036	1741	770	6362	15051	1975636	1984247	0	4763
NorthernBobwhiteSimpleDeNovoContig_109984	ref|NW_002198919.1|	74.61	3001	553	209	15119	17976	1984714	1987648	0	1936
NorthernBobwhiteSimpleDeNovoContig_109984	ref|NW_002198919.1|	80.36	2026	305	93	4341	6310	1973480	1975468	0	1790
NorthernBobwhiteSimpleDeNovoContig_109984	ref|NW_002198919.1|	74.98	1383	240	106	18002	19357	1987934	1989237	0	890
NorthernBobwhiteSimpleDeNovoContig_109984	ref|NW_002198919.1|	80.42	577	83	30	1078	1631	1970398	1970967	8e-141	509
NorthernBobwhiteSimpleDeNovoContig_109984	ref|NW_002198919.1|	73.48	690	142	41	2508	3174	1971198	1971869	6e-98	367
NorthernBobwhiteSimpleDeNovoContig_109984	ref|NW_002198919.1|	63.79	845	190	116	161	977	1969440	1970196	4e-30	141
Sum Matches bp		Sum AlignLength-->	17558
6524.9		NewCorrectedForAL	4.19711e-05
2239.05		TopEvalCorrectedForAL	7.99137e-05
1628.09		Contig Size	19380
1036.97
464.023
507.012
539.025
12939.1
12939	rounded
Query 56	Hit/Subject Chromosome	%ID	AlignLength	Mismatches	Gaps	q-start	q-end	hit-start	hit-end	evalue	bitscore
NorthernBobwhiteSimpleDeNovoContig_9683	ref|NW_002198757.1|	73.54	9182	1700	730	189	8955	23055210	2306476	0	5360
NorthernBobwhiteSimpleDeNovoContig_9683	ref|NW_002198757.1|	72.64	2288	429	197	10125	12265	23065105	23067342	0	1265
NorthernBobwhiteSimpleDeNovoContig_9683	ref|NW_002198757.1|	72.37	608	109	59	9431	9987	23054308	23064907	2e-77	298
Sum Matches bp		Sum AlignLength-->	12078
6752.44		NewCorrectedForAL	6.06945e-05
1662		TopEvalCorrectedForAL	8.00915e-05
440.01		Contig Size	12266
8854.46
8854	rounded
Query 57	Hit/Subject Chromosome	%ID	AlignLength	Mismatches	Gaps	q-start	q-end	hit-start	hit-end	evalue	bitscore
NorthernBobwhiteSimpleDeNovoContig_11350	ref|NW_002197117.1|	78.56	9775	1386	710	2547	12036	2209704	2219053	0	7885
NorthernBobwhiteSimpleDeNovoContig_11350	ref|NW_002197117.1|	86.33	1697	169	63	800	2483	2207861	2209507	0	1990
NorthernBobwhiteSimpleDeNovoContig_11350	ref|NW_002197117.1|	69.2	250	48	29	168	411	2207304	2207530	3e-17	98.7
Sum Matches bp		Sum AlignLength-->	11722
7679.24		NewCorrectedForAL	6.78067e-05
1465.02		TopEvalCorrectedForAL	8.03683e-05
173		Contig Size	12232
9317.26
9317	rounded
Query 58	Hit/Subject Chromosome	%ID	AlignLength	Mismatches	Gaps	q-start	q-end	hit-start	hit-end	evalue	bitscore
NorthernBobwhiteSimpleDeNovoContig_68805	ref|NW_002198278.1|	70.23	8696	1803	786	5023	13182	348779	357224	0	3681
NorthernBobwhiteSimpleDeNovoContig_68805	ref|NW_002198278.1|	70.38	4727	941	459	14798	19181	358578	363188	0	2158
NorthernBobwhiteSimpleDeNovoContig_68805	ref|NW_002198278.1|	72.12	1069	211	87	21343	22381	364433	365444	1e-159	572
NorthernBobwhiteSimpleDeNovoContig_68805	ref|NW_002198278.1|	71.27	985	220	63	3028	3954	346602	347527	3e-154	554
NorthernBobwhiteSimpleDeNovoContig_68805	ref|NW_002198278.1|	67.78	1108	236	121	1675	2765	345573	346576	3e-103	385
NorthernBobwhiteSimpleDeNovoContig_68805	ref|NW_002198278.1|	76.55	469	76	34	4210	4646	347690	348156	2e-91	345
NorthernBobwhiteSimpleDeNovoContig_68805	ref|NW_002198278.1|	83.02	212	33	3	13656	13866	357665	357874	1e-51	214
NorthernBobwhiteSimpleDeNovoContig_68805	ref|NW_002198278.1|	73.93	257	49	18	501	754	344960	345201	2e-35	159
NorthernBobwhiteSimpleDeNovoContig_68805	ref|NW_002198278.1|	77.78	207	37	9	20639	20839	364004	364207	3e-33	152
NorthernBobwhiteSimpleDeNovoContig_68805	ref|NW_002198278.1|	68.17	355	70	43	4	343	112954	112628	4e-25	125
Sum Matches bp		Sum AlignLength-->	18085
6107.2		NewCorrectedForAL	3.90929e-05
3326.86		TopEvalCorrectedForAL	8.07613e-05
770.963		Contig Size	23427
702.01
751.002
359.019
176.002
190
161.005
242.004
12786.1
12786	rounded
Query 59	Hit/Subject Chromosome	%ID	AlignLength	Mismatches	Gaps	q-start	q-end	hit-start	hit-end	evalue	bitscore
NorthernBobwhiteSimpleDeNovoContig_64455	ref|NW_002198982.1|	76.42	9454	1570	659	384	9501	4709476	4700346	0	6774
NorthernBobwhiteSimpleDeNovoContig_64455	ref|NW_002198982.1|	79.85	3862	645	133	18521	22314	4690329	4686533	0	3333
NorthernBobwhiteSimpleDeNovoContig_64455	ref|NW_002198982.1|	78.26	2272	358	136	11355	13551	4697786	4695576	0	1835
NorthernBobwhiteSimpleDeNovoContig_64455	ref|NW_002198982.1|	75.64	1605	276	115	13820	15384	4695342	4693813	0	1086
NorthernBobwhiteSimpleDeNovoContig_64455	ref|NW_002198982.1|	71.2	1719	329	166	9676	11273	4699868	4698195	0	856
NorthernBobwhiteSimpleDeNovoContig_64455	ref|NW_002198982.1|	74.22	1187	207	99	15850	16951	4693501	4692329	0	778
NorthernBobwhiteSimpleDeNovoContig_64455	ref|NW_002198982.1|	75.32	624	116	38	17475	18078	4691632	4691027	1e-108	403
Sum Matches bp		Sum AlignLength-->	20723
7224.75		NewCorrectedForAL	3.69688e-05
3083.81		TopEvalCorrectedForAL	8.08335e-05
1778.07		Contig Size	22508
1214.02
1223.93
880.991
469.997
15875.6
15876	rounded
Query 60	Hit/Subject Chromosome	%ID	AlignLength	Mismatches	Gaps	q-start	q-end	hit-start	hit-end	evalue	bitscore
NorthernBobwhiteSimpleDeNovoContig_122037	ref|NW_002198282.1|	79.98	9854	1333	640	243	9661	40977643	40987291	0	8605
Sum Matches bp		Sum AlignLength-->	9854
7881.23		NewCorrectedForAL	NA
7881	rounded	TopEvalCorrectedForAL	8.1165e-05
		Contig Size	9682
Query 61	Hit/Subject Chromosome	%ID	AlignLength	Mismatches	Gaps	q-start	q-end	hit-start	hit-end	evalue	bitscore
NorthernBobwhiteSimpleDeNovoContig_18565	ref|NW_002198269.1|	71.34	8782	1792	725	3977	12342	25685976	25677504	0	4296
NorthernBobwhiteSimpleDeNovoContig_18565	ref|NW_002198269.1|	87.15	599	70	7	8	604	25690077	25689484	0	722
NorthernBobwhiteSimpleDeNovoContig_18565	ref|NW_002198269.1|	70.05	1723	365	151	1472	3137	25688616	25686988	0	706
NorthernBobwhiteSimpleDeNovoContig_18565	ref|NW_002198269.1|	71.15	260	52	23	3572	3813	25686820	25686566	2e-25	125
Sum Matches bp		Sum AlignLength-->	11364
6265.08		NewCorrectedForAL	6.33341e-05
522.029		TopEvalCorrectedForAL	8.12343e-05
1206.96		Contig Size	12357
184.99
8179.06
8179	rounded
Query 62	Hit/Subject Chromosome	%ID	AlignLength	Mismatches	Gaps	q-start	q-end	hit-start	hit-end	evalue	bitscore
NorthernBobwhiteSimpleDeNovoContig_36442	ref|NW_002197559.1	75.03	9171	1494	796	2979	11741	4362201	4370983	0	6062
NorthernBobwhiteSimpleDeNovoContig_36442	ref|NW_002197559.2	74.43	2182	425	133	170	2286	4357591	4359704	0	1328
NorthernBobwhiteSimpleDeNovoContig_36442	ref|NW_002197559.3	70.94	1187	262	83	11758	12889	4371083	4372241	3e-151	544
NorthernBobwhiteSimpleDeNovoContig_36442	ref|NW_002197559.4	80	385	65	12	2564	2936	4359768	4360152	7e-89	336
Sum Matches bp		Sum AlignLength-->	12925
6881		NewCorrectedForAL	5.77951e-05
1624.06		TopEvalCorrectedForAL	8.18122e-05
842.058		Contig Size	12895
308
9655.12
9655	rounded
Query 63	Hit/Subject Chromosome	%ID	AlignLength	Mismatches	Gaps	q-start	q-end	hit-start	hit-end	evalue	bitscore
NorthernBobwhiteSimpleDeNovoContig_9672	ref|NW_002197691.1|	70.74	8632	1747	779	3773	12057	25743304	25751503	0	4015
NorthernBobwhiteSimpleDeNovoContig_9672	ref|NW_002197691.1|	74.09	2516	473	179	12252	14669	25751929	25754363	0	1534
NorthernBobwhiteSimpleDeNovoContig_9672	ref|NW_002197691.1|	72.87	833	171	55	2144	2957	25741066	25741862	1e-123	452
NorthernBobwhiteSimpleDeNovoContig_9672	ref|NW_002197691.1|	68.35	913	216	73	616	1474	25738704	25739597	8e-76	293
Sum Matches bp		Sum AlignLength-->	12894
6106.28		NewCorrectedForAL	5.53426e-05
1864.1		TopEvalCorrectedForAL	8.19509e-05
607.007		Contig Size	14712
624.035
9201.42
9201	rounded
Query 64	Hit/Subject Chromosome	%ID	AlignLength	Mismatches	Gaps	q-start	q-end	hit-start	hit-end	evalue	bitscore
NorthernBobwhiteSimpleDeNovoContig_15192	ref|NW_002198757.1|	81.96	9939	1306	487	9295	18970	16028743	16019029	0	9703
NorthernBobwhiteSimpleDeNovoContig_15192	ref|NW_002198757.1|	72.01	2665	474	272	25092	27703	16012386	16009941	0	1409
NorthernBobwhiteSimpleDeNovoContig_15192	ref|NW_002198757.1|	72.77	2519	460	226	6032	8435	16031948	16029541	0	1370
NorthernBobwhiteSimpleDeNovoContig_15192	ref|NW_002198757.1|	71.5	2509	546	169	22357	24789	16015033	16012618	0	1238
NorthernBobwhiteSimpleDeNovoContig_15192	ref|NW_002198757.1|	74.71	870	155	65	30942	31764	16007561	16006710	2e-158	569
NorthernBobwhiteSimpleDeNovoContig_15192	ref|NW_002198757.1|	80.75	587	74	39	4851	5427	16033754	16033197	8e-150	540
NorthernBobwhiteSimpleDeNovoContig_15192	ref|NW_002198757.1|	68.77	1361	324	101	173	1488	16039373	16038069	3e-129	471
NorthernBobwhiteSimpleDeNovoContig_15192	ref|NW_002198757.1|	72.82	482	101	30	1982	2445	16036602	16036133	3e-67	266
NorthernBobwhiteSimpleDeNovoContig_15192	ref|NW_002198757.1|	70.74	564	114	51	3293	3825	16034398	16033855	3e-60	242
NorthernBobwhiteSimpleDeNovoContig_15192	ref|NW_002198757.1|	70.06	521	121	35	29354	29866	16009105	16008612	5e-57	232
Sum Matches bp		Sum AlignLength-->	22017
8146		NewCorrectedForAL	3.47954e-05
1919.07		TopEvalCorrectedForAL	8.2463e-05
1833.08		Contig Size	31764
1793.93
649.977
474.002
935.96
350.992
398.974
365.013
16867
16867	rounded
Query 65	Hit/Subject Chromosome	%ID	AlignLength	Mismatches	Gaps	q-start	q-end	hit-start	hit-end	evalue	bitscore
NorthernBobwhiteSimpleDeNovoContig_28210	ref|NW_002197294.1|	76.08	9208	1548	655	12493	21383	3886056	3894925	0	6511
NorthernBobwhiteSimpleDeNovoContig_28210	ref|NW_002197294.1|	81.81	3826	531	165	3320	7076	3877651	3881380	0	3718
NorthernBobwhiteSimpleDeNovoContig_28210	ref|NW_002197294.1|	77.6	2313	372	146	24313	26567	3898452	3900676	0	1801
NorthernBobwhiteSimpleDeNovoContig_28210	ref|NW_002197294.1|	85.5	1345	133	62	22979	24297	3896946	3898254	0	1508
NorthernBobwhiteSimpleDeNovoContig_28210	ref|NW_002197294.1|	84.31	1122	155	21	10967	12077	3884604	3885715	0	1218
NorthernBobwhiteSimpleDeNovoContig_28210	ref|NW_002197294.1|	72.63	1984	378	165	7536	9487	3882157	3884007	0	1094
NorthernBobwhiteSimpleDeNovoContig_28210	ref|NW_002197294.1|	75.73	960	180	53	21452	22394	3895099	3896022	0	661
NorthernBobwhiteSimpleDeNovoContig_28210	ref|NW_002197294.1|	69.01	1681	381	140	1513	3101	3875757	3877389	4e-178	634
NorthernBobwhiteSimpleDeNovoContig_28210	ref|NW_002197294.1|	75.8	157	35	3	370	526	3026387	3026540	1e-20	111
NorthernBobwhiteSimpleDeNovoContig_28210	ref|NW_002197294.1|	69.69	254	66	11	692	941	3875047	3875293	2e-18	104
Sum Matches bp		Sum AlignLength-->	22850
7005.45		NewCorrectedForAL	3.38043e-05
3130.05		TopEvalCorrectedForAL	8.26238e-05
1794.89		Contig Size	26630
1149.97
945.958
1440.98
727.008
1160.06
119.006
177.013
17650.4
17650	rounded
Query 66	Hit/Subject Chromosome	%ID	AlignLength	Mismatches	Gaps	q-start	q-end	hit-start	hit-end	evalue	bitscore
NorthernBobwhiteSimpleDeNovoContig_93289	ref|NW_002198840.1|	74.83	9041	1571	705	2768	11455	6650182	6641494	0	5737
NorthernBobwhiteSimpleDeNovoContig_93289	ref|NW_002198840.1|	77.62	1519	256	84	17	1506	6652912	6651449	0	1157
NorthernBobwhiteSimpleDeNovoContig_93289	ref|NW_002198840.1|	79.11	1216	194	60	11857	13047	6639987	6638807	0	1021
Sum Matches bp		Sum AlignLength-->	11776
6765.38		NewCorrectedForAL	6.42225e-05
1179.05		TopEvalCorrectedForAL	8.27674e-05
961.978		Contig Size	13047
8906.41
8906	rounded
Query 67	Hit/Subject Chromosome	%ID	AlignLength	Mismatches	Gaps	q-start	q-end	hit-start	hit-end	evalue	bitscore
NorthernBobwhiteSimpleDeNovoContig_27080	ref|NW_002198282.1|	79.42	9592	1494	480	15549	24853	9103445	9112843	0	8219
NorthernBobwhiteSimpleDeNovoContig_27080	ref|NW_002198282.1|	78.03	6981	1164	370	2093	8875	9089530	9096338	0	5494
NorthernBobwhiteSimpleDeNovoContig_27080	ref|NW_002198282.1|	77.58	4265	697	259	8943	13091	9096477	9100598	0	3305
NorthernBobwhiteSimpleDeNovoContig_27080	ref|NW_002198282.1|	72.49	2004	294	57	25678	27648	9115070	9117049	0	1979
NorthernBobwhiteSimpleDeNovoContig_27080	ref|NW_002198282.1|	71.69	2024	412	161	69	1999	9087260	9089215	0	1036
NorthernBobwhiteSimpleDeNovoContig_27080	ref|NW_002198282.1|	82.63	691	101	19	24920	25603	9113737	9114415	0	691
NorthernBobwhiteSimpleDeNovoContig_27080	ref|NW_002198282.1|	68.42	1219	215	170	14254	15325	9102169	9103364	3e-136	495
NorthernBobwhiteSimpleDeNovoContig_27080	ref|NW_002198282.1|	76.41	496	93	24	13243	13708	9100844	9101336	2e-92	349
Sum Matches bp		Sum AlignLength-->	27272
7617.97		NewCorrectedForAL	2.83182e-05
5447.27		TopEvalCorrectedForAL	8.27982e-05
3308.79		Contig Size	27656
1452.7
1451.01
570.973
834.04
378.994
21061.7
21062	rounded
Query 68	Hit/Subject Chromosome	%ID	AlignLength	Mismatches	Gaps	q-start	q-end	hit-start	hit-end	evalue	bitscore
NorthernBobwhiteSimpleDeNovoContig_6375	ref|NW_002198506.1|	72.37	8740	1598	817	5066	13424	16599275	16590972	0	4583
NorthernBobwhiteSimpleDeNovoContig_6375	ref|NW_002198506.1|	65.68	2427	545	288	1	2278	16603099	16600812	6e-147	529
NorthernBobwhiteSimpleDeNovoContig_6375	ref|NW_002198506.1|	72.98	496	111	23	3967	4459	16599882	16599407	2e-71	275
NorthernBobwhiteSimpleDeNovoContig_6375	ref|NW_002198506.1|	73.32	401	87	20	2720	3105	16600684	1660289	3e-56	228
NorthernBobwhiteSimpleDeNovoContig_6375	ref|NW_002198506.1|	69.7	198	42	18	3696	3878	16600230	16600036	9e-12	80.6
Sum Matches bp		Sum AlignLength-->	12262
6325.14		NewCorrectedForAL	5.79489e-05
1594.05		TopEvalCorrectedForAL	8.28032e-05
361.981		Contig Size	13428
294.013
138.006
8713.19
8713	rounded
Query 69	Hit/Subject Chromosome	%ID	AlignLength	Mismatches	Gaps	q-start	q-end	hit-start	hit-end	evalue	bitscore
NorthernBobwhiteSimpleDeNovoContig_13267	ref|NW_002197738.1|	75.07	9010	1548	698	480	9132	10937925	10946593	0	5936
NorthernBobwhiteSimpleDeNovoContig_13267	ref|NW_002197738.1|	70.27	481	95	48	10036	10473	10948278	10948753	3e-54	221
NorthernBobwhiteSimpleDeNovoContig_13267	ref|NW_002197738.1|	75.47	159	33	6	297	454	4836574	4836727	6e-16	104
Sum Matches bp		Sum AlignLength-->	9650
6763.81		NewCorrectedForAL	7.75538e-05
337.999		TopEvalCorrectedForAL	8.33185e-05
119.997		Contig Size	10745
7221.8
7222	rounded
Query 70	Hit/Subject Chromosome	%ID	AlignLength	Mismatches	Gaps	q-start	q-end	hit-start	hit-end	evalue	bitscore
NorthernBobwhiteSimpleDeNovoContig_117769	ref|NW_002197250.1|	70.52	8436	1633	854	1790	9704	6526002	6517900	0	3793
NorthernBobwhiteSimpleDeNovoContig_117769	ref|NW_002197250.1|	76.29	1708	284	121	9750	11413	6517377	6545747	0	1211
NorthernBobwhiteSimpleDeNovoContig_117769	ref|NW_002197250.1|	73.12	1730	349	116	12097	13767	6514928	6513256	0	939
NorthernBobwhiteSimpleDeNovoContig_117769	ref|NW_002197250.1|	68.82	1347	279	141	72	1344	6527816	6526537	5e-129	470
NorthernBobwhiteSimpleDeNovoContig_117769	ref|NW_002197250.1|	72.43	486	109	25	11539	12009	6515404	6514929	2e-57	232
Sum Matches bp		Sum AlignLength-->	13707
5949.07		NewCorrectedForAL	5.19954e-05
1303.03		TopEvalCorrectedForAL	8.35941e-05
1264.98		Contig Size	13924
927.005
352.01
9796.09
9769	rounded
Query 71	Hit/Subject Chromosome	%ID	AlignLength	Mismatches	Gaps	q-start	q-end	hit-start	hit-end	evalue	bitscore
NorthernBobwhiteSimpleDeNovoContig_122488	ref|NW_002199036.1|	70.51	8430	1790	696	8288	16372	5302598	5310676	0	3658
NorthernBobwhiteSimpleDeNovoContig_122488	ref|NW_002199036.1|	75.8	1942	333	137	59	1912	5294856	5296748	0	1323
NorthernBobwhiteSimpleDeNovoContig_122488	ref|NW_002199036.1|	67.38	2943	684	276	4606	7350	5299369	5302233	0	868
NorthernBobwhiteSimpleDeNovoContig_122488	ref|NW_002199036.1|	63.99	1158	269	148	3027	4162	5297528	5298559	6e-47	197
Sum Matches bp		Sum AlignLength-->	14473
5943.99		NewCorrectedForAL	4.84084e-05
1472.04		TopEvalCorrectedForAL	8.36418e-05
1982.99		Contig Size	16818
741.004
10140
10140	rounded
Query 72	Hit/Subject Chromosome	%ID	AlignLength	Mismatches	Gaps	q-start	q-end	hit-start	hit-end	evalue	bitscore
NorthernBobwhiteSimpleDeNovoContig_144431	ref|NW_002198282.1|	69	8225	1775	775	703	8519	23004252	23012109	0	3094
NorthernBobwhiteSimpleDeNovoContig_144431	ref|NW_002198282.1|	68.97	2117	391	266	10233	12162	23013137	23015174	0	812
NorthernBobwhiteSimpleDeNovoContig_144431	ref|NW_002198282.1|	64.95	1207	271	152	9578	10722	23012515	23013631	2e-58	235
Sum Matches bp		Sum AlignLength-->	11549
5675.25		NewCorrectedForAL	5.9372e-05
1460.09		TopEvalCorrectedForAL	8.38906e-05
783.947		Contig Size	12276
7919.29
7919	rounded
Query 73	Hit/Subject Chromosome	%ID	AlignLength	Mismatches	Gaps	q-start	q-end	hit-start	hit-end	evalue	bitscore
NorthernBobwhiteSimpleDeNovoContig_3729	ref|NW_002197556.1|	70.37	8344	1673	799	413	8293	7463645	7471652	0	3645
NorthernBobwhiteSimpleDeNovoContig_3729	ref|NW_002197556.1|	68.51	3598	776	357	16645	17117	7476553	7479918	0	1256
NorthernBobwhiteSimpleDeNovoContig_3729	ref|NW_002197556.1|	70.88	1844	359	178	11185	12935	7473839	7475597	0	857
NorthernBobwhiteSimpleDeNovoContig_3729	ref|NW_002197556.1|	75.31	976	185	56	9328	10265	7471823	7472780	2e-178	634
NorthernBobwhiteSimpleDeNovoContig_3729	ref|NW_002197556.1|	66.79	783	222	38	10276	11031	7473052	7473823	6e-47	197
NorthernBobwhiteSimpleDeNovoContig_3729	ref|NW_002197556.1|	67.44	688	195	29	8455	9128	1887128	1886456	9e-45	190
NorthernBobwhiteSimpleDeNovoContig_3729	ref|NW_002197556.1|	68.21	585	153	33	8667	9242	8199949	8200509	3e-44	188
Sum Matches bp		Sum AlignLength-->	16818
5871.67		NewCorrectedForAL	4.15952e-05
2464.99		TopEvalCorrectedForAL	8.4336e-05
1307.03		Contig Size	17207
735.026
522.966
463.987
399.028
11764.7
11765	rounded
Query 74	Hit/Subject Chromosome	%ID	AlignLength	Mismatches	Gaps	q-start	q-end	hit-start	hit-end	evalue	bitscore
NorthernBobwhiteSimpleDeNovoContig_71045	ref|NW_002198513.1|	83.27	9862	1454	196	6887	16653	17506893	17497133	0	10239
NorthernBobwhiteSimpleDeNovoContig_71045	ref|NW_002198513.1|	66.17	4079	900	480	2898	6716	17510831	17506973	0	985
NorthernBobwhiteSimpleDeNovoContig_71045	ref|NW_002198513.1|	69.88	1275	255	129	1401	2616	17512779	17511575	3e-146	527
NorthernBobwhiteSimpleDeNovoContig_71045	ref|NW_002198513.1|	68.51	416	89	42	35	432	17514188	17513797	1e-29	140
NorthernBobwhiteSimpleDeNovoContig_71045	ref|NW_002198513.1|	67.74	279	61	29	551	824	17513636	17513382	9e-13	140
Sum Matches bp		Sum AlignLength-->	15911
8212.09		NewCorrectedForAL	4.84911e-05
2699.07		TopEvalCorrectedForAL	8.44352e-05
890.97		Contig Size	16983
285.002
188.995
12276.1
12276	rounded
