# Supplementary material for: A Draft De Novo Genome Assembly for the Northern Bobwhite (Colinus virginianus) Reveals Evidence for a Rapid Decline in Effective Population Size Beginning in the Late Pleistocene
Source: PLoS One. 2014 Mar 12;9(3):e90240. doi: 10.1371/journal.pone.0090240 (PMC3951200; doi:10.1371/journal.pone.0090240)
Supplement: Table S13 — NB1.0 Simple de novo Assembly Stats. (XLSX) [file pone.0090240.s013.xlsx]

## Sheet: Table S13 NB1.0 Assembly Stats
Table S13-A NB1.0 Simple De Novo Assembly Stats
Simple Contig ID	Reference length	Mapped reads	Forward reads	Reversed reads	Reads in aligned (intact) pairs-all libraries	Reads in broken pairs: wrong distance or mate inverted-all libraries	Reads in broken pairs: mate on other contig-all libraries	Reads in broken pairs: mate not mapped-all libraries	Mean distance-all libraries	Standard deviation	Non-perfect matches	Minimum coverage	Maximum coverage	Average coverage	Standard deviation	% GC
NorthernBobwhite_SimpleContig_ 1	7471	14818	7398	7420	5738	7088	476	1442	685.856	1049.1	3989	8	226	148.5	26.623	42.551
NorthernBobwhite_SimpleContig_ 2	1760	3000	1527	1473	940	1298	440	315	275.036	33.737	1285	2	180	132.574	24.48	35.966
NorthernBobwhite_SimpleContig_ 3	303	324	157	167	16	78	147	81	252.75	13.065	57	2	142	74.492	39.981	43.894
NorthernBobwhite_SimpleContig_ 4	408	490	251	239	58	136	201	94	262.448	21.807	137	3	183	89.015	48.31	43.382
NorthernBobwhite_SimpleContig_ 5	3633	6572	3322	3250	2350	2982	477	739	460.862	611.048	1936	3	231	137.69	33.195	37.848
NorthernBobwhite_SimpleContig_ 6	3065	6026	3059	2967	1928	2900	431	737	405.59	509.788	1716	3	250	138.208	48.276	50.212
NorthernBobwhite_SimpleContig_ 7	21977	40900	20394	20506	17720	18988	691	3305	841.732	1244.14	11239	8	249	144.297	28.568	38.508
NorthernBobwhite_SimpleContig_ 8	319	334	195	139	10	122	130	71	262.8	15.341	48	2	115	71.019	26.88	51.411
NorthernBobwhite_SimpleContig_ 9	3248	4913	2407	2506	1746	2120	491	530	342.639	364.412	1985	11	175	119.268	24.212	32.081
NorthernBobwhite_SimpleContig_ 10	2047	3724	1888	1836	1102	1638	410	557	279.013	34.642	1091	6	192	138.321	28.95	36.981
NorthernBobwhite_SimpleContig_ 11	819	1456	715	741	422	556	132	336	278.972	34.139	629	9	196	141.897	36.52	40.781
NorthernBobwhite_SimpleContig_ 12	16625	31739	15897	15842	12816	15518	795	2443	776.884	1154.21	9058	2	234	144.865	26.879	40.229
NorthernBobwhite_SimpleContig_ 13	7428	15210	7524	7686	5712	7424	630	1374	617.621	935.71	4897	9	251	149.997	31.154	46.702
NorthernBobwhite_SimpleContig_ 14	9007	20403	10186	10217	7684	10214	747	1654	638.003	990.041	5357	5	241	160.788	39.278	50.572
NorthernBobwhite_SimpleContig_ 15	28888	55575	27771	27804	23174	27554	557	3990	808.033	1222.24	12179	6	251	141.075	31.479	44.953
NorthernBobwhite_SimpleContig_ 16	10755	25573	12631	12942	10316	12192	802	2119	726.698	1056.96	6683	11	263	173.548	27.96	48.815
NorthernBobwhite_SimpleContig_ 17	6085	11309	5644	5665	4450	5206	582	1016	519.082	787.71	2935	4	232	145.281	29.027	38.882
NorthernBobwhite_SimpleContig_ 18	3538	6648	3322	3326	2370	3010	522	712	358.589	409.569	1858	3	212	144.726	27.733	40.531
NorthernBobwhite_SimpleContig_ 19	10223	25572	12727	12845	9924	12538	745	2242	617.665	947.293	7361	1	263	175.684	38.573	54.886
NorthernBobwhite_SimpleContig_ 20	7383	11609	5805	5804	4670	5258	475	1145	526.929	773.838	3896	6	182	123.846	21.735	36.923
NorthernBobwhite_SimpleContig_ 21	22014	44664	22327	22337	18828	21448	848	3341	826.841	1229.32	11787	10	251	152.848	28.152	43.15
NorthernBobwhite_SimpleContig_ 22	335	447	227	220	44	122	79	201	265.318	22.75	150	2	152	99.836	41.613	46.269
NorthernBobwhite_SimpleContig_ 23	934	2035	1050	985	582	830	188	425	275.887	35.324	403	7	257	159.171	48.338	47.752
NorthernBobwhite_SimpleContig_ 24	1587	2152	1084	1068	716	910	322	192	275.902	33.686	678	3	166	110.046	37.321	34.531
NorthernBobwhite_SimpleContig_ 25	7721	16635	8176	8459	6466	8062	722	1304	660.271	993.324	4344	1	241	156.615	29.05	47.248
NorthernBobwhite_SimpleContig_ 26	8094	16194	8059	8135	6182	7934	826	1165	661.75	1042.84	3312	5	223	150.237	24.107	42.501
NorthernBobwhite_SimpleContig_ 27	8263	16933	8443	8490	6420	7996	688	1757	675.417	1015.66	5759	6	247	152.795	30.739	42.273
NorthernBobwhite_SimpleContig_ 28	8520	17273	8694	8579	7054	7978	616	1532	669.401	981.777	4371	10	231	154.142	26.64	43.286
NorthernBobwhite_SimpleContig_ 29	3418	5910	3014	2896	2060	2766	470	582	351.861	385.698	1956	4	202	135.221	24.624	38.18
NorthernBobwhite_SimpleContig_ 30	346	1435	747	688	134	448	319	532	262.358	24.804	513	7	420	284.48	114.224	55.491
NorthernBobwhite_SimpleContig_ 31	8052	18642	9211	9431	6714	8910	981	1958	617.431	935.66	4814	0	719	164.809	50.437	47.752
NorthernBobwhite_SimpleContig_ 32	11038	12120	6134	5986	4532	5292	700	1526	649.549	1002.32	2569	0	984	81.341	58.885	41.629
NorthernBobwhite_SimpleContig_ 33	3262	5593	2794	2799	1882	2402	643	644	381.372	459.234	1352	6	219	132.422	32.248	37.492
NorthernBobwhite_SimpleContig_ 34	2924	5006	2413	2593	1678	1992	509	807	324.002	306.729	1642	7	384	132.077	41.533	35.944
NorthernBobwhite_SimpleContig_ 35	6982	19903	9914	9989	7192	9862	866	1878	544.077	829.396	4869	12	307	194.169	40.226	58.25
NorthernBobwhite_SimpleContig_ 36	11443	21824	10948	10876	8824	10498	494	1884	822.542	1223.64	4663	0	244	143.855	30.965	40.225
NorthernBobwhite_SimpleContig_ 37	2210	4245	2099	2146	1340	1886	511	487	274.9	33.271	1204	3	211	143.826	32.127	42.398
NorthernBobwhite_SimpleContig_ 38	1888	4528	2289	2239	1340	2054	471	631	279.246	35.755	1295	2	248	168.686	38.553	52.225
NorthernBobwhite_SimpleContig_ 39	14101	28039	13986	14053	11336	13570	521	2472	795.033	1189.78	8541	0	239	149.097	27.002	42.898
NorthernBobwhite_SimpleContig_ 40	7635	15898	7966	7932	6034	7540	708	1535	595.153	937.203	4889	8	230	157.23	27.265	42.004
NorthernBobwhite_SimpleContig_ 41	10617	18712	9409	9303	7866	8716	670	1365	726.688	1133.42	4651	6	209	136.452	24.078	38.42
NorthernBobwhite_SimpleContig_ 42	1659	3162	1615	1547	906	1394	280	563	275.762	34.253	937	7	231	128.006	48.557	59.916
NorthernBobwhite_SimpleContig_ 43	692	145090	68958	76132	10188	41100	7823	84859	265.484	29.317	68155	0	29992	13252.2	9025.23	57.081
NorthernBobwhite_SimpleContig_ 44	4992	10470	5254	5216	3932	4884	681	916	499.876	689.711	2792	7	237	158.597	29.931	42.488
NorthernBobwhite_SimpleContig_ 45	17071	31867	15879	15988	13636	14972	692	2407	798.842	1215.72	8508	5	232	142.759	29.269	40.086
NorthernBobwhite_SimpleContig_ 46	6875	15196	7528	7668	5966	7120	877	1150	620.625	939.034	3530	3	229	165.129	27.657	44.815
NorthernBobwhite_SimpleContig_ 47	5578	9344	4678	4666	3558	4338	612	784	484.215	666.47	2555	10	194	130.459	24.72	37.092
NorthernBobwhite_SimpleContig_ 48	6913	11182	5481	5701	4344	5256	702	832	554.688	812.931	2920	9	209	125.088	27.072	36.54
NorthernBobwhite_SimpleContig_ 49	364	415	231	184	32	130	21	231	255.938	23.413	68	4	138	88.209	36.899	32.967
NorthernBobwhite_SimpleContig_ 50	894	2068	1038	1030	418	756	221	668	275.407	32.142	1050	9	319	168.84	51.566	50.224
NorthernBobwhite_SimpleContig_ 51	1719	3147	1549	1598	982	1400	455	295	278.305	34.932	691	1	193	140.23	32.225	41.07
NorthernBobwhite_SimpleContig_ 52	1330	2093	1072	1021	656	884	225	318	278.305	33.155	634	5	178	126.014	27.849	37.218
NorthernBobwhite_SimpleContig_ 53	1778	3588	1784	1804	1074	1718	340	441	275.536	35.14	820	3	218	153.206	33.957	40.551
NorthernBobwhite_SimpleContig_ 54	4013	8429	4175	4254	2910	4152	445	891	417.271	535.665	2775	2	241	150.705	39.017	48.617
NorthernBobwhite_SimpleContig_ 55	2048	3049	1540	1509	1036	1304	370	317	277.498	33.611	915	5	168	118.161	26.041	36.279
NorthernBobwhite_SimpleContig_ 56	5194	9333	4712	4621	3562	4308	569	841	491.787	694.631	2912	4	233	139.991	25.877	39.064
NorthernBobwhite_SimpleContig_ 57	39542	80528	40215	40313	33262	39592	841	6438	854.013	1253.26	23213	8	264	151.813	28.724	42.76
NorthernBobwhite_SimpleContig_ 58	12530	25677	12822	12855	9830	12882	692	2125	754.754	1171.35	7418	9	249	149.817	31.064	46.464
NorthernBobwhite_SimpleContig_ 59	312	276	165	111	12	48	163	52	247.333	19.154	65	2	118	65.064	30.789	52.885
NorthernBobwhite_SimpleContig_ 60	24446	49958	24951	25007	20614	24824	774	3506	809.148	1206.26	12828	7	264	149.397	27.301	45.214
NorthernBobwhite_SimpleContig_ 61	15959	28733	14318	14415	12292	13490	839	1963	758.114	1169.46	6973	5	222	138.817	24.536	38.824
NorthernBobwhite_SimpleContig_ 62	9460	15956	8023	7933	6538	7516	540	1287	639.974	992.861	3814	8	214	131.616	24.485	37.4
NorthernBobwhite_SimpleContig_ 63	37841	63894	32031	31863	27704	29168	1353	5320	818.116	1238.22	12109	0	362	131.182	28.369	36.228
NorthernBobwhite_SimpleContig_ 64	12113	22290	11202	11088	8802	10532	1048	1799	730.935	1136.62	3955	0	275	139.182	29.644	39.14
NorthernBobwhite_SimpleContig_ 65	4230	8608	4255	4353	2830	4102	626	1005	433.134	558.073	2662	6	237	149.915	32.237	44.303
NorthernBobwhite_SimpleContig_ 66	3655	6788	3394	3394	2362	2974	495	919	421.434	543.221	2792	6	196	139.923	26.63	42.161
NorthernBobwhite_SimpleContig_ 67	690	1317	690	627	320	448	281	261	278.075	35.808	480	8	188	139.038	38.08	45.507
NorthernBobwhite_SimpleContig_ 68	9832	15273	7577	7696	6336	6926	516	1413	610.147	910.044	3903	0	197	121.943	23.841	34.276
NorthernBobwhite_SimpleContig_ 69	5236	10280	5169	5111	3786	4558	737	1142	462.745	600.352	3591	8	276	146.712	25.894	41.253
NorthernBobwhite_SimpleContig_ 70	1081	2518	1398	1120	668	1226	278	334	277.341	35.085	571	1	237	167.806	48.175	50.509
NorthernBobwhite_SimpleContig_ 71	5425	11004	5537	5467	4012	5316	589	1024	464.66	614.721	2351	0	241	150.827	37.78	42.673
NorthernBobwhite_SimpleContig_ 72	2542	5079	2486	2593	1562	2268	638	579	285.147	134.06	1340	9	236	149.589	27.849	44.414
NorthernBobwhite_SimpleContig_ 73	2067	4586	2262	2324	1322	2130	587	517	278.51	35.026	1346	7	275	161.968	30.663	43.106
NorthernBobwhite_SimpleContig_ 74	7639	16674	8369	8305	6280	8212	677	1434	594.132	915.866	3293	7	231	163.152	25.787	44.391
NorthernBobwhite_SimpleContig_ 75	3934	11909	5836	6073	3990	5684	908	1264	410.727	521.36	2626	0	303	225.964	37.662	43.518
NorthernBobwhite_SimpleContig_ 76	371	5438	2916	2522	638	1528	1849	1396	266.818	27.655	2367	84	1464	1119.93	379.291	41.24
NorthernBobwhite_SimpleContig_ 77	3567	5805	2801	3004	2178	2418	447	731	351.398	401.449	1972	5	195	129.31	26.793	36.137
NorthernBobwhite_SimpleContig_ 78	13877	29230	14587	14643	11948	13892	706	2549	765.846	1141.28	8802	10	254	157.212	34.079	42.624
NorthernBobwhite_SimpleContig_ 79	551	993	519	474	254	358	75	300	275.74	36.424	209	8	193	140.829	43.03	38.838
NorthernBobwhite_SimpleContig_ 80	8506	15120	7568	7552	5580	6376	1033	2050	598.537	891.628	5672	0	594	138.269	46.8	36.68
NorthernBobwhite_SimpleContig_ 81	3700	5987	3054	2933	2194	2592	458	718	374.34	449.753	1711	0	191	128.268	32.511	35.189
NorthernBobwhite_SimpleContig_ 82	1366	1956	1002	954	646	768	200	335	277.406	35.792	624	3	169	112.524	29.648	30.966
NorthernBobwhite_SimpleContig_ 83	5331	8909	4397	4512	3456	3932	540	943	553.126	789.333	3073	7	189	129.331	26.181	36.185
NorthernBobwhite_SimpleContig_ 84	3491	5580	2793	2787	1952	2490	372	732	386.542	478.226	1852	5	210	124.292	27.377	35.405
NorthernBobwhite_SimpleContig_ 85	8596	21847	11037	10810	8040	11134	736	1821	673.696	1003.74	5080	5	258	182.724	28.827	50.302
NorthernBobwhite_SimpleContig_ 86	604	1042	517	525	266	408	143	222	272.842	33.066	229	1	195	134.608	43.908	36.921
NorthernBobwhite_SimpleContig_ 87	4972	7505	3778	3727	2900	3334	443	787	450.164	597.454	2848	5	189	120.844	22.553	34.473
NorthernBobwhite_SimpleContig_ 88	5265	10820	5453	5367	3512	4778	1057	1410	540.437	733.739	2072	0	338	149.79	38.581	43.932
NorthernBobwhite_SimpleContig_ 89	6924	6138	3100	3038	2440	2882	330	449	664.384	997.295	1093	4	115	68.286	15.364	39.443
NorthernBobwhite_SimpleContig_ 90	3872	7172	3564	3608	2506	3180	552	889	416.749	532.322	1861	6	215	137.747	28.557	40.444
NorthernBobwhite_SimpleContig_ 91	8462	16434	8215	8219	6118	7608	779	1857	623.387	936.846	4768	0	210	143.09	31.124	43.512
NorthernBobwhite_SimpleContig_ 92	469	523	264	259	82	180	148	109	272.195	34.743	90	7	109	78.64	23.454	44.776
NorthernBobwhite_SimpleContig_ 93	4949	9876	4913	4963	3544	4580	843	869	487.613	649.752	2346	6	225	148.727	28.985	41.503
NorthernBobwhite_SimpleContig_ 94	12797	31461	15738	15723	12048	15852	830	2567	698.842	1052.81	8198	5	296	177.828	34.357	47.589
NorthernBobwhite_SimpleContig_ 95	5839	10001	4975	5026	4066	4490	516	876	575.994	873.3	3428	7	216	132.322	24.075	37.387
NorthernBobwhite_SimpleContig_ 96	10012	16306	8132	8174	7042	7520	484	1185	622.162	980.103	5131	5	198	129.241	22.342	37.415
NorthernBobwhite_SimpleContig_ 97	648	1294	671	623	346	446	117	373	274.15	36.233	255	5	205	152.066	45.063	45.988
NorthernBobwhite_SimpleContig_ 98	1266	2088	1061	1027	620	894	307	260	276.926	34.014	398	4	165	128.561	25.679	38.073
NorthernBobwhite_SimpleContig_ 99	2630	7139	3669	3470	2004	3774	571	749	313.44	258.044	1799	1	302	176.378	71.779	65.475
NorthernBobwhite_SimpleContig_ 100	1707	3055	1505	1550	924	1370	324	425	275.779	33.433	1305	4	218	136.458	33.854	38.196
NorthernBobwhite_SimpleContig_ 101	6411	11393	5649	5744	4590	5184	588	981	559.498	818.876	3335	8	222	139.184	27.551	37.092
NorthernBobwhite_SimpleContig_ 102	10737	24279	12060	12219	9394	12164	757	1851	742.881	1159.62	7164	5	255	166.402	30.608	46.866
NorthernBobwhite_SimpleContig_ 103	3248	6845	3396	3449	2204	3432	483	690	356.918	401.091	2003	3	238	155.763	29.583	44.089
NorthernBobwhite_SimpleContig_ 104	7556	16069	7915	8154	6032	8230	411	1321	599.78	900.965	4455	1	243	145.009	35.001	54.314
NorthernBobwhite_SimpleContig_ 105	4155	8316	4159	4157	2916	3920	781	656	453.183	598.132	1784	9	221	148.511	25.966	39.928
NorthernBobwhite_SimpleContig_ 106	2166	4151	2100	2051	1280	1752	567	524	277.044	35.817	1141	2	242	141.617	40.985	41.32
NorthernBobwhite_SimpleContig_ 107	15982	29211	14597	14614	12192	13940	692	2261	767.143	1157.1	6809	4	223	139.542	26.495	39.92
NorthernBobwhite_SimpleContig_ 108	13004	23021	11535	11486	9290	10706	832	2083	738.219	1137.01	6836	4	289	134.976	27.314	39.357
NorthernBobwhite_SimpleContig_ 109	2217	4135	2102	2033	1320	1850	385	552	278.942	79.18	1577	3	202	143.106	31.007	40.415
NorthernBobwhite_SimpleContig_ 110	3485	8323	4163	4160	2770	4004	683	817	393.35	489.493	2383	4	258	165.463	42.067	56.93
NorthernBobwhite_SimpleContig_ 111	4620	10190	5118	5072	3194	5420	551	986	424.681	549.427	2992	5	283	148.65	46.444	57.987
NorthernBobwhite_SimpleContig_ 112	7586	14654	7321	7333	5766	6834	726	1258	673.035	1008.12	3811	7	221	146.677	26.529	39.573
NorthernBobwhite_SimpleContig_ 113	10098	17972	8962	9010	7256	8682	456	1481	672.534	1016.56	4529	11	223	137.341	25.348	38.919
NorthernBobwhite_SimpleContig_ 114	5714	10939	5511	5428	4122	5114	524	1111	508.739	706.818	3076	2	231	146.227	30.473	41.425
NorthernBobwhite_SimpleContig_ 115	964	1696	876	820	448	640	223	374	275.54	32.758	356	9	196	131.812	35.901	41.079
NorthernBobwhite_SimpleContig_ 116	8554	16432	8291	8141	6258	7872	586	1634	690.035	1066.28	5320	7	223	146.533	27.042	39.292
NorthernBobwhite_SimpleContig_ 117	2505	4828	2412	2416	1662	2112	444	590	293.23	164.215	1557	6	219	147.583	30.07	41.637
NorthernBobwhite_SimpleContig_ 118	960	2135	1116	1019	506	910	454	254	277.119	33.589	692	7	202	156.139	35.124	51.25
NorthernBobwhite_SimpleContig_ 119	14292	25990	12958	13032	10494	12270	667	2419	750.248	1153.81	8628	6	256	139.784	28.681	38.945
NorthernBobwhite_SimpleContig_ 120	7277	13509	6685	6824	5154	6420	588	1289	509.913	789.572	3613	3	239	141.726	32.499	40.36
NorthernBobwhite_SimpleContig_ 121	1192	2332	1189	1143	718	954	289	358	273.487	34.592	553	5	202	152.443	34.401	41.443
NorthernBobwhite_SimpleContig_ 122	4072	7868	3863	4005	3012	3492	572	754	480.544	642.294	2358	7	209	148.586	25.177	40.25
NorthernBobwhite_SimpleContig_ 123	470	89	43	46	10	34	16	29	248.6	13.908	18	1	24	13.489	5.798	31.702
NorthernBobwhite_SimpleContig_ 124	3419	1494	761	733	470	720	81	214	397.149	484.326	237	2	59	30.13	9.759	48.581
NorthernBobwhite_SimpleContig_ 125	12384	5803	2915	2888	2334	2848	146	441	798.562	1172.89	851	1	72	31.594	10.546	55.547
NorthernBobwhite_SimpleContig_ 126	21544	41908	20951	20957	17530	20450	921	2812	725.661	1112.3	8714	4	385	147.773	44.145	41.455
NorthernBobwhite_SimpleContig_ 127	1455	2183	1070	1113	656	952	93	473	278.183	37.928	350	6	157	117.546	22.313	34.021
NorthernBobwhite_SimpleContig_ 128	16950	30226	15043	15183	12980	14060	680	2355	718.127	1090.41	8526	7	238	137.869	24.029	38.501
NorthernBobwhite_SimpleContig_ 129	2868	4653	2356	2297	1540	2022	575	498	330.143	325.481	1563	1	184	124.186	26.669	34.763
NorthernBobwhite_SimpleContig_ 130	2330	3845	1924	1921	1260	1678	436	450	279.548	34.735	1126	10	198	128.528	25.467	36.824
NorthernBobwhite_SimpleContig_ 131	3241	6331	3237	3094	2090	3222	557	434	316.967	286.161	1810	1	215	142.993	43.696	48.38
NorthernBobwhite_SimpleContig_ 132	2000	3156	1599	1557	1036	1486	290	332	278.39	35.26	821	3	183	124.557	27.101	37.7
NorthernBobwhite_SimpleContig_ 133	2552	4074	2032	2042	1418	1736	384	522	322.261	293.768	1121	3	183	125.526	25.519	36.56
NorthernBobwhite_SimpleContig_ 134	16577	27563	13728	13835	12146	12790	441	2050	716.312	1084.89	8163	5	245	131.336	24.819	36.309
NorthernBobwhite_SimpleContig_ 135	4360	7585	3846	3739	3024	3316	611	599	459.644	611.886	2194	1	208	135.145	25.831	38.073
NorthernBobwhite_SimpleContig_ 136	16703	34650780	17439103	17211677	12645266	19408390	75190	2173571	528.878	1063.3	7104041	3	236139	159694	33435.9	45.207
NorthernBobwhite_SimpleContig_ 137	6022	10899	5423	5476	4288	5082	630	849	558.684	829.847	3224	6	228	141.73	26.64	38.974
NorthernBobwhite_SimpleContig_ 138	508	530	256	274	86	164	127	150	263.419	34.138	95	6	108	74.762	21.734	49.213
NorthernBobwhite_SimpleContig_ 139	16859	33752	16865	16887	13716	16376	716	2751	806.992	1201.25	9786	4	286	149.44	26.75	43.194
NorthernBobwhite_SimpleContig_ 140	17032	41306	20552	20754	16164	20536	1010	3398	816.726	1221.34	9038	0	292	177.115	35.03	46.841
NorthernBobwhite_SimpleContig_ 141	2539	3924	1963	1961	1270	1530	423	683	286.331	139.625	1303	3	171	119.304	26.102	38.007
NorthernBobwhite_SimpleContig_ 142	1042	2539	1244	1295	646	1162	273	448	278.102	34.663	769	8	244	174.863	46.819	49.52
NorthernBobwhite_SimpleContig_ 143	12316	24086	11959	12127	9720	11456	678	2100	702.144	1057.32	6919	5	242	148.339	25.758	42.498
NorthernBobwhite_SimpleContig_ 144	14326	21686	10840	10846	9364	10094	478	1654	679.996	1073.95	6050	6	216	120.882	24.089	33.813
NorthernBobwhite_SimpleContig_ 145	5037	10014	4962	5052	3658	4638	620	1050	463.625	608.57	2832	1	225	152.446	29.473	40.56
NorthernBobwhite_SimpleContig_ 146	1951	3632	1787	1845	1110	1642	368	496	277.854	35.28	1050	6	208	139.502	34.885	42.132
NorthernBobwhite_SimpleContig_ 147	6300	11693	5801	5892	4562	5392	687	1001	529.957	795.789	3406	7	236	142.001	31.421	40.524
NorthernBobwhite_SimpleContig_ 148	5675	11269	5692	5577	4244	5220	682	1069	551.093	745.647	3511	5	306	150.854	37.845	39.859
NorthernBobwhite_SimpleContig_ 149	17648	32543	16370	16173	12814	15750	1036	2786	628.717	968.497	7677	3	240	139.725	28.108	40.979
NorthernBobwhite_SimpleContig_ 150	2505	4470	2210	2260	1420	1992	414	623	280.43	85.268	1701	1	203	138.426	30.034	42.196
NorthernBobwhite_SimpleContig_ 151	9359	22455	11224	11231	8440	11300	794	1821	669.716	1035.36	4209	11	274	171.492	34.566	49.642
NorthernBobwhite_SimpleContig_ 152	21393	40059	20101	19958	17214	19046	707	2887	823.006	1248.44	10370	6	232	143.215	26.38	39.588
NorthernBobwhite_SimpleContig_ 153	4252	8704	4374	4330	3220	3814	717	902	432.398	558.843	2758	3	245	154.857	33.655	43.391
NorthernBobwhite_SimpleContig_ 154	6516	9447	4748	4699	3714	4352	399	923	483.9	682.207	2744	2	181	115.454	20.654	34.3
NorthernBobwhite_SimpleContig_ 155	1307	2269	1143	1126	690	834	331	400	276.939	33.669	556	8	183	130.226	26.977	43.917
NorthernBobwhite_SimpleContig_ 156	2087	4917	2510	2407	1372	2440	519	559	280.242	35.587	1218	6	235	170.677	31.844	49.209
NorthernBobwhite_SimpleContig_ 157	5593	8600	4273	4327	3368	3838	430	921	492.984	700.19	3011	4	198	121.957	27.949	35.08
NorthernBobwhite_SimpleContig_ 158	11916	19917	10020	9897	8460	9320	567	1467	663.107	1025.21	4876	5	216	130.374	28.993	37.739
NorthernBobwhite_SimpleContig_ 159	17374	36329	18288	18041	14368	18200	968	2612	790.689	1169.01	6506	3	252	153.234	32.099	44.641
NorthernBobwhite_SimpleContig_ 160	3896	6738	3332	3406	2460	2980	574	688	386.202	473.505	2076	6	205	135.553	28.139	37.449
NorthernBobwhite_SimpleContig_ 161	16240	13638	6816	6822	5830	6354	455	924	683.791	1010.93	2350	0	116	65.849	14.827	36.182
NorthernBobwhite_SimpleContig_ 162	555	1154	599	555	210	374	169	394	270.238	31.948	250	4	209	151.764	44.8	52.793
NorthernBobwhite_SimpleContig_ 163	4304	7885	3997	3888	2868	3486	536	944	535.492	721.399	2018	9	207	137.983	28.173	42.1
NorthernBobwhite_SimpleContig_ 164	14203	5969	3037	2932	2246	3010	130	547	745.082	1104.58	892	0	66	27.868	9.01	54.841
NorthernBobwhite_SimpleContig_ 165	23200	53086	26547	26539	20500	26354	1293	4700	841.41	1254.21	14298	0	432	165.142	36.519	49.103
NorthernBobwhite_SimpleContig_ 166	389	1064	523	541	48	78	115	816	278.083	39.668	712	6	587	148.661	144.477	54.242
NorthernBobwhite_SimpleContig_ 167	988	1970	965	1005	488	918	204	349	275.066	35.57	433	7	205	144.84	39.838	46.862
NorthernBobwhite_SimpleContig_ 168	2801	5549	2707	2842	1820	2404	617	684	301.49	220.399	1945	0	262	147.809	35.359	41.628
NorthernBobwhite_SimpleContig_ 169	2345	4282	2173	2109	1326	1944	391	599	285.072	111.317	1455	12	220	140.731	28.826	37.953
NorthernBobwhite_SimpleContig_ 170	7900	13081	6566	6515	5516	5730	571	1220	657.23	1001.87	3606	11	196	128.747	22.882	36.304
NorthernBobwhite_SimpleContig_ 171	4342	3508	1787	1721	1332	1522	155	478	471.254	621.324	945	1	102	57.536	17.187	51.382
NorthernBobwhite_SimpleContig_ 172	9446	22514	11141	11373	8678	10890	940	1892	702.836	1051.2	6622	8	245	173.563	28.397	48.084
NorthernBobwhite_SimpleContig_ 173	2865	424890	212386	212504	136658	193488	39407	53244	341.716	363.927	154460	809	14323	10963.9	2139.87	45.166
NorthernBobwhite_SimpleContig_ 174	7092	13337	6665	6672	5124	6266	680	1201	649.464	941.019	3816	3	219	141.456	23.857	40.948
NorthernBobwhite_SimpleContig_ 175	16234	37215	18520	18695	15476	17938	767	2859	808.657	1201.95	8982	4	294	170.096	31.898	45.226
NorthernBobwhite_SimpleContig_ 176	2441	4161	2092	2069	1330	1836	509	473	276.059	35.004	1166	4	183	132.749	26.409	38.304
NorthernBobwhite_SimpleContig_ 177	1959	3522	1761	1761	1036	1546	401	525	282.23	35.064	1613	3	238	137.637	36.127	38.846
NorthernBobwhite_SimpleContig_ 178	38461	18115	9094	9021	7572	8966	159	1302	784.706	1178.4	2674	0	74	32.198	8.715	54.284
NorthernBobwhite_SimpleContig_ 179	342	421	238	183	52	106	166	96	260.423	25.521	67	6	135	92.064	30.555	34.795
NorthernBobwhite_SimpleContig_ 180	8812	18753	9425	9328	7170	8984	881	1637	703.252	1104.04	5286	6	248	156.52	30.548	43.532
NorthernBobwhite_SimpleContig_ 181	1818	4160	2051	2109	1132	2104	422	477	276.267	32.159	1089	3	227	150.409	37.785	62.761
NorthernBobwhite_SimpleContig_ 182	15370	31580	15843	15737	13128	15010	827	2449	819.555	1230.82	8845	6	238	153.941	27.04	43.585
NorthernBobwhite_SimpleContig_ 183	2250	3770	1859	1911	1288	1614	333	518	278.927	35.591	1277	3	201	132.489	30.351	36.622
NorthernBobwhite_SimpleContig_ 184	25563	39350	19677	19673	17592	18332	399	2848	701.296	1101.31	7276	0	218	123.132	23.769	33.306
NorthernBobwhite_SimpleContig_ 185	3381	6677	3289	3388	2206	3278	453	711	387.569	485.729	1820	1	251	141.692	40.651	53.209
NorthernBobwhite_SimpleContig_ 186	2951	6704	3288	3416	2092	3304	564	714	315.693	287.227	1807	9	234	164.205	33.332	48.39
NorthernBobwhite_SimpleContig_ 187	2436	4942	2417	2525	1682	2122	483	636	289.161	153.965	1564	6	231	154.179	34.465	42.734
NorthernBobwhite_SimpleContig_ 188	5194	8575	4367	4208	3062	4042	608	827	480.246	688.621	1974	0	203	125.855	29.661	38.564
NorthernBobwhite_SimpleContig_ 189	12859	24225	12107	12118	9770	11470	526	2332	739.09	1127.02	8030	3	210	143.479	24.54	41.558
NorthernBobwhite_SimpleContig_ 190	22936	54724	27405	27319	22430	27252	947	3815	776.679	1156.73	11445	3	281	174.267	29.925	48.125
NorthernBobwhite_SimpleContig_ 191	823	1267	605	662	326	500	262	172	276.19	33.81	389	6	168	118.469	31.594	36.087
NorthernBobwhite_SimpleContig_ 192	1450	3916	1960	1956	1076	1802	369	650	279.599	35.541	679	10	271	191.961	44.019	50.345
NorthernBobwhite_SimpleContig_ 193	2358	27650	13666	13984	8910	13048	2811	2763	281.672	103.238	6756	40	1151	881.579	167.278	44.487
NorthernBobwhite_SimpleContig_ 194	7457	13158	6599	6559	5082	6086	561	1361	648.473	992.688	3702	8	251	134.039	29.726	37.87
NorthernBobwhite_SimpleContig_ 195	2581	5033	2514	2519	1660	2160	543	637	294.487	190.472	1525	11	221	148.469	29.063	42.348
NorthernBobwhite_SimpleContig_ 196	5588	10266	5082	5184	3858	4654	602	1104	493.942	705.857	3310	4	224	143.01	25.882	39.531
NorthernBobwhite_SimpleContig_ 197	5577	9231	4558	4673	3248	4606	581	753	475.308	631.71	2001	9	218	117.276	42.177	51.515
NorthernBobwhite_SimpleContig_ 198	7258	11868	5907	5961	4854	5422	464	1081	523.86	785.177	3245	2	209	130.388	24.871	37.104
NorthernBobwhite_SimpleContig_ 199	10071	16512	8216	8296	6664	7840	464	1480	653.085	1078.05	4606	2	200	128.383	27.454	36.789
NorthernBobwhite_SimpleContig_ 200	622	1647	803	844	368	566	401	305	274.614	35.046	561	10	276	202.984	61.477	44.695
NorthernBobwhite_SimpleContig_ 201	2090	3539	1822	1717	1038	1496	417	576	278.089	35.945	1159	11	218	129.639	30.301	38.995
NorthernBobwhite_SimpleContig_ 202	8732	15221	7588	7633	6244	7068	607	1219	569.907	898.287	4093	2	214	135.85	24.83	37.723
NorthernBobwhite_SimpleContig_ 203	3880	8034	3999	4035	2820	3834	597	751	396.284	498.167	2293	7	248	155.906	33.639	43.093
NorthernBobwhite_SimpleContig_ 204	2554	6083	3063	3020	1852	2952	596	641	325.988	319.492	1371	7	271	163.002	53.896	56.891
NorthernBobwhite_SimpleContig_ 205	12081	24992	12548	12444	9982	12008	759	2139	781.905	1202.54	6369	11	236	154.131	24.98	43.035
NorthernBobwhite_SimpleContig_ 206	827	727	368	359	188	256	114	167	273.713	38.347	143	5	97	65.056	16.054	44.982
NorthernBobwhite_SimpleContig_ 207	1635	2972	1478	1494	910	1264	400	387	277.018	34.762	786	8	204	141.237	39.001	40.122
NorthernBobwhite_SimpleContig_ 208	1234	2379	1221	1158	700	982	398	286	275.689	33.125	774	9	211	145.506	33.754	40.194
NorthernBobwhite_SimpleContig_ 209	1140	2769	1386	1383	722	1166	405	458	276.283	34.239	975	4	256	175.425	47.178	54.298
NorthernBobwhite_SimpleContig_ 210	2622	6481	3232	3249	1950	3018	596	882	322.121	303.692	2031	11	252	176.446	35.374	50.877
NorthernBobwhite_SimpleContig_ 211	560	898	451	447	170	396	139	188	279.071	36.05	137	8	176	125.702	40.675	35.179
NorthernBobwhite_SimpleContig_ 212	3454	5714	2827	2887	1992	2554	380	758	373.77	449.28	959	0	189	128.653	28.891	38.043
NorthernBobwhite_SimpleContig_ 213	8378	14362	7202	7160	5580	6666	603	1446	684.214	1052.51	4378	0	233	130.746	28.417	39.174
NorthernBobwhite_SimpleContig_ 214	2243	3814	1853	1961	1206	1774	398	416	277.247	35.87	1476	2	173	132.152	26.481	35.845
NorthernBobwhite_SimpleContig_ 215	3697	6065	3035	3030	2270	2678	442	645	408.25	519.2	1500	4	187	127.598	22.442	37.517
NorthernBobwhite_SimpleContig_ 216	6108	13551	6825	6726	4776	6478	779	1464	587.519	901.405	4181	7	249	164.66	35.529	44.45
NorthernBobwhite_SimpleContig_ 217	6264	12152	6093	6059	4598	5794	629	1085	621.913	911.008	3095	9	239	145.861	32.3	39.671
NorthernBobwhite_SimpleContig_ 218	405	387	199	188	64	100	82	140	274.906	30.941	70	4	113	74.97	26.925	37.778
NorthernBobwhite_SimpleContig_ 219	3793	6541	3181	3360	2428	2960	509	604	392.777	493.313	1179	1	201	132.445	29.856	37.622
NorthernBobwhite_SimpleContig_ 220	3193	10159	5165	4994	3104	4880	768	1360	352.994	393.02	2297	2	322	214.308	43.079	57.971
NorthernBobwhite_SimpleContig_ 221	1391	2122	1069	1053	680	900	232	299	275.456	34.764	624	5	170	118.971	29.488	34.651
NorthernBobwhite_SimpleContig_ 222	13382	24835	12345	12490	10548	11384	660	2121	768.92	1147.66	6744	5	217	144.138	24.821	38.529
NorthernBobwhite_SimpleContig_ 223	3200	5083	2559	2524	1906	2190	400	560	345.149	377.985	1627	4	228	125.944	31.507	34.938
NorthernBobwhite_SimpleContig_ 224	14820	28964	14456	14508	11972	13956	641	2255	812.631	1187.29	6972	4	236	145.834	29.268	43.354
NorthernBobwhite_SimpleContig_ 225	5730	9522	4756	4766	3754	4332	540	851	491.817	676.689	3054	7	215	132.703	25.149	36.527
NorthernBobwhite_SimpleContig_ 226	7362	15484	7703	7781	5688	7772	666	1275	587.914	898.418	4445	10	253	153.683	37.917	46.903
NorthernBobwhite_SimpleContig_ 227	4683	7873	3905	3968	3244	3506	490	593	457.324	603.333	1792	2	202	132.622	24.695	37.519
NorthernBobwhite_SimpleContig_ 228	2666	4669	2378	2291	1480	2004	586	564	302.508	242.446	1710	13	213	135.761	25.68	39.01
NorthernBobwhite_SimpleContig_ 229	8096	15687	7829	7858	6098	7382	795	1326	674.172	985.614	4344	7	233	144.219	23.791	42.824
NorthernBobwhite_SimpleContig_ 230	5831	12344	6185	6159	4338	5920	810	1204	521.614	743.949	3494	4	233	155.639	26.769	45.55
NorthernBobwhite_SimpleContig_ 231	10240	20427	10242	10185	8128	9782	647	1764	677.374	1005.67	5295	1	221	149.133	28.438	42.744
NorthernBobwhite_SimpleContig_ 232	3887	6278	3084	3194	2110	2722	664	750	414.948	526.325	2112	0	192	123.79	30.021	35.992
NorthernBobwhite_SimpleContig_ 233	441	602	285	317	92	232	110	160	269.674	26.426	117	1	176	102.2	47.614	39.456
NorthernBobwhite_SimpleContig_ 234	1056	2575	1445	1130	566	614	233	1149	280.611	34.956	1263	5	1064	150.62	190.83	54.167
NorthernBobwhite_SimpleContig_ 235	909	1570	763	807	412	492	123	531	280.748	35.337	545	7	207	120.19	33.229	50.165
NorthernBobwhite_SimpleContig_ 236	12733	26635	13392	13243	10508	13260	641	2066	760.784	1161.33	7348	1	246	155.007	28.057	44.506
NorthernBobwhite_SimpleContig_ 237	2482	5018	2605	2413	1574	2262	489	666	286.714	147.883	1833	0	221	153.62	40.054	43.674
NorthernBobwhite_SimpleContig_ 238	2065	3341	1688	1653	1188	1424	395	312	279.084	35.735	1083	5	185	129.738	28.053	36.126
NorthernBobwhite_SimpleContig_ 239	7342	11646	5901	5745	4700	5266	697	916	570.522	900.572	3576	5	189	124.535	22.177	35.059
NorthernBobwhite_SimpleContig_ 240	3670	5684	2758	2926	2118	2604	471	469	396.415	500.033	1816	6	188	123.417	22.889	35.995
NorthernBobwhite_SimpleContig_ 241	9455	3440	1705	1735	1422	1630	84	282	584.264	796.871	625	1	56	26.202	8.37	47.086
NorthernBobwhite_SimpleContig_ 242	19549	15963	8005	7958	7086	7384	254	1186	754.894	1193.23	2693	0	126	64.715	14.805	34.621
NorthernBobwhite_SimpleContig_ 243	7333	15792	7918	7874	5664	7672	725	1636	615.395	893.536	5024	7	237	158.136	28.774	44.525
NorthernBobwhite_SimpleContig_ 244	5162	11120	5566	5554	3862	5386	594	1238	452.189	603.374	3314	9	235	155.672	32.375	46.745
NorthernBobwhite_SimpleContig_ 245	5341	2380	1186	1194	930	1060	171	206	397.355	498.348	340	1	74	31.662	8.903	53.08
NorthernBobwhite_SimpleContig_ 246	7465	3610	1857	1753	1384	1728	177	302	562.587	757.988	560	2	72	34.675	10.601	48.198
NorthernBobwhite_SimpleContig_ 247	5387	12775	6337	6438	4632	6070	878	1143	504.707	676.579	3934	9	257	176.326	32.964	45.239
NorthernBobwhite_SimpleContig_ 248	8537	3918	1952	1966	1542	1890	186	281	557.399	882.635	628	1	69	32.044	9.114	52.255
NorthernBobwhite_SimpleContig_ 249	7611	4143	2056	2087	1628	2010	179	286	632.424	931.875	584	1	69	35.212	10.265	61.056
NorthernBobwhite_SimpleContig_ 250	9662	20760	10388	10372	7834	10178	638	2029	696.86	1025.57	6531	10	250	159.503	31.823	44.37
NorthernBobwhite_SimpleContig_ 251	2368	6151	3111	3040	1720	3130	514	755	287.112	149.764	1334	9	249	168.671	62.052	63.598
NorthernBobwhite_SimpleContig_ 252	4741	8438	4208	4230	3114	3956	661	659	432.231	563.381	1977	7	210	137.297	26.369	38.262
NorthernBobwhite_SimpleContig_ 253	1299	2510	1259	1251	686	1070	403	341	274.315	32.829	878	10	201	145.734	39.918	41.339
NorthernBobwhite_SimpleContig_ 254	1375	2170	1145	1025	614	950	239	358	278.251	33.317	575	1	192	123.719	32.684	36.436
NorthernBobwhite_SimpleContig_ 255	2717	6222	3092	3130	1738	2994	756	710	295.878	195.64	1640	7	250	160.75	39.392	50.534
NorthernBobwhite_SimpleContig_ 256	16047	38404	19245	19159	14674	19468	828	3246	826.175	1230.13	11108	8	327	167.006	36.795	52.203
NorthernBobwhite_SimpleContig_ 257	10797	22201	11159	11042	9386	10348	630	1705	765.091	1171.97	6525	3	239	154.995	26.244	42.456
NorthernBobwhite_SimpleContig_ 258	1812	4356	2136	2220	1196	2002	600	537	275.952	34.449	1277	2	233	171.193	34.286	48.786
NorthernBobwhite_SimpleContig_ 259	2553	5369	2604	2765	1580	2544	617	608	294.005	174.169	1763	1	246	149.251	44.108	50.92
NorthernBobwhite_SimpleContig_ 260	591	99573	53887	45686	19890	32572	8253	38318	273.847	32.241	50967	335	26024	12672.2	7369.87	37.733
NorthernBobwhite_SimpleContig_ 261	4646	6534	3268	3266	2604	2906	462	524	437.783	573.172	1964	2	160	114.23	22.75	32.845
NorthernBobwhite_SimpleContig_ 262	9041	14816	7334	7482	6222	6726	543	1259	705.054	1054.71	5040	5	204	129.045	24.548	37.186
NorthernBobwhite_SimpleContig_ 263	17209	32828	16460	16368	13594	15882	588	2605	832.958	1297.14	8759	8	250	146.281	26.759	39.09
NorthernBobwhite_SimpleContig_ 264	8854	20359	10145	10214	7840	9744	908	1749	681.507	1031.54	5933	6	257	167.392	26.934	47.628
NorthernBobwhite_SimpleContig_ 265	5710	12108	6065	6043	4582	5484	787	1190	540.209	792.295	4089	6	236	158.745	32.637	44.623
NorthernBobwhite_SimpleContig_ 266	3436	7359	3601	3758	2590	3266	608	853	440.561	573.498	2100	7	214	159.844	29.121	44.703
NorthernBobwhite_SimpleContig_ 267	12416	24949	12509	12440	9468	12212	811	2343	679.271	1077.81	7220	0	249	149.895	32.275	42.196
NorthernBobwhite_SimpleContig_ 268	10623	9145	4519	4626	3864	4386	275	578	669.096	1065.3	1593	4	120	67.661	15.712	37.089
NorthernBobwhite_SimpleContig_ 269	6094	15140	7650	7490	5392	7336	755	1586	550.89	763.634	4586	15	271	172.978	35.291	54.677
NorthernBobwhite_SimpleContig_ 270	4450	8495	4251	4244	3046	3788	659	960	524.861	703.758	2965	2	225	144.07	28.657	40.697
NorthernBobwhite_SimpleContig_ 271	4313	7429	3774	3655	2898	3166	529	777	419.022	541.068	2200	5	213	135.091	25.3	37.955
NorthernBobwhite_SimpleContig_ 272	8415	15892	7998	7894	6108	7914	602	1207	598.26	921.169	3662	2	251	140.706	35.422	44.73
NorthernBobwhite_SimpleContig_ 273	481	618	273	345	120	196	189	110	264.667	28.528	106	4	132	96.667	27.033	33.68
NorthernBobwhite_SimpleContig_ 274	2698	3993	2007	1986	1484	1722	365	400	304.499	219.637	1459	2	152	116.422	18.923	35.953
NorthernBobwhite_SimpleContig_ 275	14222	26441	13248	13193	10976	12376	651	2310	758.931	1115.52	6864	3	236	141.385	25.48	40.451
NorthernBobwhite_SimpleContig_ 276	2938	5739	2888	2851	1836	2520	539	813	345.145	375.034	2006	10	216	146.355	29.661	41.219
NorthernBobwhite_SimpleContig_ 277	20693	42750	21255	21495	17514	20754	927	3335	811.803	1203.83	8446	0	479	155.061	34.265	41.541
NorthernBobwhite_SimpleContig_ 278	34492	83702	41798	41904	33996	41738	1016	6520	879.313	1274.37	22664	0	285	173.952	30.006	49.771
NorthernBobwhite_SimpleContig_ 279	6397	12347	6168	6179	4596	6176	611	902	568.954	811.796	3631	5	245	145.622	29.048	39.597
NorthernBobwhite_SimpleContig_ 280	12803	22228	11030	11198	9326	10618	462	1719	730.157	1146.6	6369	8	198	135.17	23.182	38.311
NorthernBobwhite_SimpleContig_ 281	7106	11163	5581	5582	4354	5038	586	1129	509.427	785.97	2445	6	213	125.22	26.052	33.394
NorthernBobwhite_SimpleContig_ 282	2599	5641	2785	2856	1752	2602	513	755	289.745	153.273	1286	2	251	160.537	29.111	43.902
NorthernBobwhite_SimpleContig_ 283	10810	23572	11840	11732	9142	10992	691	2619	725.515	1062.49	6099	0	251	159.849	34.501	45.042
NorthernBobwhite_SimpleContig_ 284	73093	33965	16976	16989	14450	16324	568	2420	759.195	1147.88	5210	1	81	32.11	9.33	53.463
NorthernBobwhite_SimpleContig_ 285	21201	18306	9092	9214	7928	8464	504	1319	763.878	1139.5	3326	0	142	66.39	15.903	38.173
NorthernBobwhite_SimpleContig_ 286	5362	5052	2494	2558	1992	2360	309	369	475.718	678.961	895	2	113	72.662	15.614	39.537
NorthernBobwhite_SimpleContig_ 287	8251	14848	7439	7409	5840	6844	753	1321	645.5	1005.58	4304	3	222	136.907	24.02	39.874
NorthernBobwhite_SimpleContig_ 288	19794	43237	21698	21539	18596	20432	906	3082	851.403	1243.57	11619	2	294	165.074	27.387	42.912
NorthernBobwhite_SimpleContig_ 289	5460	9814	4960	4854	3690	4508	607	962	497.254	696.549	3477	6	221	138.465	30.071	40.018
NorthernBobwhite_SimpleContig_ 290	503	727	329	398	112	200	128	285	275.732	34.847	134	4	184	106.159	45.608	39.563
NorthernBobwhite_SimpleContig_ 291	398	388	207	181	44	108	49	183	273.364	36.354	69	5	119	78.101	27.738	28.894
NorthernBobwhite_SimpleContig_ 292	4807	9336	4583	4753	3624	4352	517	785	499.607	698.405	1994	4	236	147.84	29.526	39.172
NorthernBobwhite_SimpleContig_ 293	2767	3021	1485	1536	864	1300	395	443	301.451	216.571	874	0	174	82.806	37.857	35.49
NorthernBobwhite_SimpleContig_ 294	14015	30019	15147	14872	12384	14466	752	2278	799.6	1170.94	5114	2	268	160.165	28.169	42.611
NorthernBobwhite_SimpleContig_ 295	8479	14672	7342	7330	5912	6774	624	1296	612.881	947.756	4656	5	188	134.42	23.449	36.797
NorthernBobwhite_SimpleContig_ 296	7851	13858	6859	6999	5726	6490	466	1106	590.086	900.123	3912	0	247	137.881	28.282	38.632
NorthernBobwhite_SimpleContig_ 297	15176	29226	14732	14494	11822	14670	733	1873	759.995	1155.09	5244	1	382	144.098	31.389	41.144
NorthernBobwhite_SimpleContig_ 298	54841	101560	50797	50763	43654	49080	1137	7209	891.55	1311.27	18037	0	353	140.457	29.222	39.573
NorthernBobwhite_SimpleContig_ 299	28478	57336	28748	28588	23980	27396	1000	4664	821.774	1218.38	15061	0	424	151.837	30.364	42.141
NorthernBobwhite_SimpleContig_ 300	4935	11141	5605	5536	3722	5650	599	1102	417.494	539.202	3740	6	249	161.722	43.014	49.362
NorthernBobwhite_SimpleContig_ 301	6980	19701	9885	9816	7030	9906	1103	1555	533.777	815.029	5676	10	291	191.972	35.651	58.696
NorthernBobwhite_SimpleContig_ 302	4753	8690	4329	4361	3376	3912	567	795	434.775	566.161	2354	4	213	141.922	24.798	38.271
NorthernBobwhite_SimpleContig_ 303	1523	2422	1156	1266	854	1036	260	263	273.96	31.693	980	3	193	125.009	36.005	35.653
NorthernBobwhite_SimpleContig_ 304	9183	19327	9691	9636	6706	9130	1338	2053	524.563	772.868	5552	2	335	154.195	31.89	45.486
NorthernBobwhite_SimpleContig_ 305	5183	9106	4622	4484	3318	4384	504	857	436.223	595.361	2906	4	225	132.559	35.422	40.729
NorthernBobwhite_SimpleContig_ 306	470	619	333	286	138	234	46	199	269.348	29.597	135	7	165	107.23	34.774	32.766
NorthernBobwhite_SimpleContig_ 307	11520	18728	9380	9348	7826	8898	688	1216	677.416	1036.76	3370	0	204	126.294	23.122	36.215
NorthernBobwhite_SimpleContig_ 308	12340	21994	10927	11067	9086	10344	527	1901	762.814	1144.55	5702	12	211	138.126	26.711	38.25
NorthernBobwhite_SimpleContig_ 309	2925	4599	2274	2325	1666	2016	466	422	332.67	331.562	1095	2	192	126.059	27.368	36.581
NorthernBobwhite_SimpleContig_ 310	10803	21344	10634	10710	8724	10138	688	1683	707.903	1055.95	6371	4	220	149.467	28.807	41.396
NorthernBobwhite_SimpleContig_ 311	3740	7920	3944	3976	2660	3804	536	880	422.117	542.126	2095	9	219	153.651	25.738	45.936
NorthernBobwhite_SimpleContig_ 312	5271	10257	5077	5180	3954	4730	658	868	479.339	639.678	2734	5	235	142.705	29.535	43.483
NorthernBobwhite_SimpleContig_ 313	84541	38221	19138	19083	16802	18244	233	2724	836.881	1223.17	5989	2	78	31.443	8.262	52.473
NorthernBobwhite_SimpleContig_ 314	11826	20770	10382	10388	8382	9574	677	2032	680.996	1077.71	6638	3	202	133.482	26.351	40.673
NorthernBobwhite_SimpleContig_ 315	9616	15561	7799	7762	6568	7092	505	1321	572.954	866.789	5152	4	228	128.663	24.789	37.448
NorthernBobwhite_SimpleContig_ 316	8943	14937	7494	7443	6166	6948	408	1357	586.442	924.684	4895	6	195	132.129	23.358	37.739
NorthernBobwhite_SimpleContig_ 317	3351	5917	2922	2995	2160	2710	469	551	408.73	514.366	2069	3	207	136.851	32.765	41.271
NorthernBobwhite_SimpleContig_ 318	14954	28567	14263	14304	11804	13688	735	2205	751.095	1132.84	6081	7	237	143.939	27.978	40.036
NorthernBobwhite_SimpleContig_ 319	58836	93798	46858	46940	42666	43882	710	6087	766.647	1169.8	16516	0	235	126.439	24.039	34.798
NorthernBobwhite_SimpleContig_ 320	3866	6177	3143	3034	2322	2704	465	654	415.761	544.918	1885	6	186	125.029	23.3	35.696
NorthernBobwhite_SimpleContig_ 321	2214	4610	2337	2273	1390	2056	597	547	280.827	80.43	914	13	234	155.817	38.343	43.225
NorthernBobwhite_SimpleContig_ 322	11285	18934	9567	9367	7946	8808	517	1565	646.597	1022.41	5360	4	222	132.329	25.736	36.323
NorthernBobwhite_SimpleContig_ 323	1674	3925	1948	1977	1136	1712	649	407	274.12	34.111	885	11	233	170.614	30.939	50.478
NorthernBobwhite_SimpleContig_ 324	742	1699	878	821	384	682	220	412	274.734	33.045	365	10	237	168.869	48.975	42.992
NorthernBobwhite_SimpleContig_ 325	3056	5317	2658	2659	1856	2390	446	595	342.911	362.294	1759	3	196	133.733	26.393	38.318
NorthernBobwhite_SimpleContig_ 326	3131	6247	3103	3144	2000	3000	523	695	379.142	455.207	1731	8	221	149.65	27.24	39.572
NorthernBobwhite_SimpleContig_ 327	23286	10276	5161	5115	4208	5032	150	835	743.809	1092.28	1595	3	67	30.726	8.135	51.095
NorthernBobwhite_SimpleContig_ 328	12605	33113	16665	16448	12540	16408	819	3189	721.578	1103.81	8221	16	294	176.27	39.736	58.469
NorthernBobwhite_SimpleContig_ 329	5085	9580	4782	4798	3532	4336	785	879	520.625	706.173	2819	9	242	142.02	28.415	40.57
NorthernBobwhite_SimpleContig_ 330	11632	27710	13951	13759	10494	13600	970	2520	720.269	1120.4	6502	0	498	175.926	38.359	46.192
NorthernBobwhite_SimpleContig_ 331	6949	14196	7126	7070	5174	6802	549	1605	617.252	951.632	4203	0	275	151.865	35.043	43.431
NorthernBobwhite_SimpleContig_ 332	767	113868	56506	57362	26080	46462	8683	32115	274.485	33.158	47919	658	13028	10573.6	2841.53	51.108
NorthernBobwhite_SimpleContig_ 333	4660	7546	3819	3727	2746	3468	641	642	408.732	513.774	2562	3	195	128.775	30.572	35.987
NorthernBobwhite_SimpleContig_ 334	679	986	500	486	280	374	195	130	277.021	32.757	202	4	158	116.206	31.515	37.408
NorthernBobwhite_SimpleContig_ 335	8932	17703	8866	8837	7058	8424	750	1393	657.698	1004.75	4663	3	253	151.788	30.999	39.498
NorthernBobwhite_SimpleContig_ 336	12194	23362	11629	11733	9532	10960	879	1890	749.432	1151.74	6304	1	222	146.41	23.503	39.347
NorthernBobwhite_SimpleContig_ 337	4975	9044	4426	4618	3530	4072	243	1148	472.29	629.36	2821	1	203	140.533	29.272	40.724
NorthernBobwhite_SimpleContig_ 338	8336	22329	11201	11128	8578	11140	797	1714	714.62	1085.95	4460	7	286	192.039	36.501	51.811
NorthernBobwhite_SimpleContig_ 339	1830	2775	1379	1396	906	1146	259	448	275.28	34.593	1001	9	207	119.437	37.67	35.628
NorthernBobwhite_SimpleContig_ 340	5742	9514	4696	4818	3616	4378	493	991	483.681	719.42	3048	3	216	130.822	25.924	37.6
NorthernBobwhite_SimpleContig_ 341	2641	6415	3178	3237	2072	2932	565	814	343.67	364.633	1830	12	232	175.077	29.101	49.981
NorthernBobwhite_SimpleContig_ 342	10960	25809	12901	12908	9938	12582	747	2415	692.855	1040.65	7245	0	262	169.819	31.334	49.434
NorthernBobwhite_SimpleContig_ 343	8459	19657	9760	9897	7554	9664	559	1777	658.788	1017.75	4907	13	262	170.243	28.171	45.455
NorthernBobwhite_SimpleContig_ 344	2454	4788	2358	2430	1462	2070	612	626	290.521	170.105	1182	6	230	145.874	33.865	39.527
NorthernBobwhite_SimpleContig_ 345	4277	9168	4587	4581	3232	4288	716	888	415.979	524.284	2067	7	227	160.194	26.069	42.857
NorthernBobwhite_SimpleContig_ 346	8134	15100	7580	7520	4762	6032	1910	2327	433.951	594.939	5891	0	553	138.896	50.213	39.292
NorthernBobwhite_SimpleContig_ 347	14726	31416	15635	15781	12074	15792	782	2596	699.117	1027.66	7479	4	263	153.605	36.22	48.01
NorthernBobwhite_SimpleContig_ 348	10856	18345	9168	9177	7604	8292	424	1948	691.33	1079.92	5478	6	220	132.038	27.665	37.629
NorthernBobwhite_SimpleContig_ 349	20486	20266	10140	10126	8640	9564	440	1522	751.76	1143.07	3631	1	152	75.473	16.973	40.54
NorthernBobwhite_SimpleContig_ 350	6152	11066	5542	5524	4064	5332	529	1086	614.373	966.264	2475	11	219	133.098	40.902	44.148
NorthernBobwhite_SimpleContig_ 351	18739	27433	13665	13768	12042	12770	526	1975	650.142	1015.57	8076	3	186	116.515	22.45	33.47
NorthernBobwhite_SimpleContig_ 352	13221	10052	5027	5025	4096	4702	352	859	676.154	1058.32	1794	0	107	59.383	12.409	34.075
NorthernBobwhite_SimpleContig_ 353	14226	12853	6384	6469	5374	6178	342	913	731.449	1121.32	2306	2	152	69.26	14.646	37.635
NorthernBobwhite_SimpleContig_ 354	6261	14206	7005	7201	5466	6688	752	1239	561.746	788.548	3980	11	278	171.238	32.583	43.06
NorthernBobwhite_SimpleContig_ 355	6516	13048	6527	6521	4948	6166	686	1192	540.086	811.713	4037	8	229	151.682	28.518	41.697
NorthernBobwhite_SimpleContig_ 356	342	35242	17419	17823	2514	8688	11967	11857	260.628	23.683	11124	691	9761	7357.78	2383.52	52.924
NorthernBobwhite_SimpleContig_ 357	3027	6367	3197	3170	2002	2878	594	858	330.173	331.596	2035	13	225	153.296	32.374	45.061
NorthernBobwhite_SimpleContig_ 358	4863	7117	3554	3563	2718	3136	372	856	420.166	546.808	2467	5	178	115.888	23.194	35.143
NorthernBobwhite_SimpleContig_ 359	6926	14957	7536	7421	5576	7180	730	1403	640.823	983.942	4548	6	267	157.281	35.42	45.062
NorthernBobwhite_SimpleContig_ 360	5102	10726	5405	5321	3810	4946	795	1119	507.296	711.159	3484	6	238	153.666	34.219	45.198
NorthernBobwhite_SimpleContig_ 361	4177	10313	5101	5212	3496	5132	594	1032	424.545	549.194	3920	1	254	173.01	33.557	56.644
NorthernBobwhite_SimpleContig_ 362	688	10082	5312	4770	2050	3576	1667	2739	275.874	34.223	4074	47	1596	1084.98	401.308	39.68
NorthernBobwhite_SimpleContig_ 363	4501	9832	4962	4870	3448	4688	717	935	456.369	600.349	2781	6	223	163.303	25.473	44.168
NorthernBobwhite_SimpleContig_ 364	11643	19935	9992	9943	8338	9232	602	1665	666.296	998.5	4815	4	206	132.514	26.255	37.705
NorthernBobwhite_SimpleContig_ 365	11785	25063	12469	12594	9930	12304	786	1894	702.35	1063.86	5164	2	273	155.768	35.738	46.661
NorthernBobwhite_SimpleContig_ 366	5870	10828	5412	5416	4184	4990	671	939	512.636	736.739	3441	4	209	140.792	30.803	39.898
NorthernBobwhite_SimpleContig_ 367	623	1094	545	549	292	408	160	230	275.733	32.277	394	3	181	133.602	40.944	44.462
NorthernBobwhite_SimpleContig_ 368	33219	71770	35944	35826	30250	35026	868	5282	853.55	1277.72	20210	4	245	157.015	28.629	46.371
NorthernBobwhite_SimpleContig_ 369	9010	3215	1598	1617	1188	1496	226	280	692.685	1067.95	466	1	54	25.137	8.328	45.361
NorthernBobwhite_SimpleContig_ 370	775	269	137	132	94	112	31	32	281.064	37.932	33	1	52	24.032	13.347	50.839
NorthernBobwhite_SimpleContig_ 371	5569	2380	1197	1183	850	1120	183	206	436.08	568.06	359	1	60	28.993	9.043	52.164
NorthernBobwhite_SimpleContig_ 372	52911	56310	27976	28334	23850	27588	974	3640	870.043	1281.44	9842	2	735	79.791	25.015	42.717
NorthernBobwhite_SimpleContig_ 373	442	580	314	266	74	208	225	70	269.838	32.519	106	8	125	83.864	26.922	55.656
NorthernBobwhite_SimpleContig_ 374	442	562	243	319	60	144	262	91	267	31.898	88	10	116	81.876	21.859	55.882
NorthernBobwhite_SimpleContig_ 375	4060	7020	3589	3431	2342	3602	354	682	431.336	561.022	1443	1	239	117.989	32.788	49.335
NorthernBobwhite_SimpleContig_ 376	9272	22490	11184	11306	8572	10952	945	1910	690.063	1038.54	5898	5	269	171.076	29.334	53.538
NorthernBobwhite_SimpleContig_ 377	531	1247	624	623	262	422	200	356	274.74	36.594	252	20	212	149.365	44.567	66.478
NorthernBobwhite_SimpleContig_ 378	5937	280614	141109	139505	110018	130148	10119	29004	517.441	767.042	68253	174	4852	3659.79	582.382	37.393
NorthernBobwhite_SimpleContig_ 379	52578	113823	56378	57445	46234	54806	2701	9535	894.526	1310.24	25257	0	2857	159.034	92.07	44.237
NorthernBobwhite_SimpleContig_ 380	4108	6679	3255	3424	2582	2950	580	535	437.342	578.087	2075	1	186	126.793	27.417	36.125
NorthernBobwhite_SimpleContig_ 381	3368	6089	3048	3041	2222	2796	624	413	389.886	490.102	1661	9	199	141.328	25.665	39.311
NorthernBobwhite_SimpleContig_ 382	434	795	363	432	146	232	98	318	277.014	34.485	142	3	211	137.737	54.845	41.705
NorthernBobwhite_SimpleContig_ 383	3427	6004	3002	3002	2012	2868	490	599	406.682	510.634	1559	7	213	131.916	26.38	40.589
NorthernBobwhite_SimpleContig_ 384	15431	29475	14712	14763	12412	14020	536	2366	763.106	1148.07	6835	2	237	145.757	22.831	39.622
NorthernBobwhite_SimpleContig_ 385	16126	35022	17553	17469	13952	17402	890	2586	778.717	1194.35	7756	7	271	156.64	35.508	48.295
NorthernBobwhite_SimpleContig_ 386	14141	30743	15318	15425	12302	14148	1080	3064	808.222	1200.97	9656	0	459	162.204	34.686	43.929
NorthernBobwhite_SimpleContig_ 387	13628	29649	14850	14799	12266	14022	850	2369	791.94	1143.51	8530	5	263	162.095	26.323	44.269
NorthernBobwhite_SimpleContig_ 388	4555	8060	3965	4095	2970	3672	573	806	436.006	574.04	2126	8	193	135.216	22.011	40.417
NorthernBobwhite_SimpleContig_ 389	3715	5672	2808	2864	2126	2328	470	725	432.958	562.662	2054	7	169	118.74	21.683	34.939
NorthernBobwhite_SimpleContig_ 390	2832	4460	2204	2256	1548	1990	407	501	333.198	337.597	1171	4	194	123.514	28.133	33.792
NorthernBobwhite_SimpleContig_ 391	3080	6000	3034	2966	1858	2858	481	779	362.643	418.535	1851	1	246	144.47	39.363	42.597
NorthernBobwhite_SimpleContig_ 392	10130	23134	11560	11574	8750	11508	765	1985	686.239	1064.88	6179	5	257	166.82	26.13	46.259
NorthernBobwhite_SimpleContig_ 393	7575	18467	9312	9155	6940	8826	597	2000	706.322	1036.7	5343	6	251	170.221	32.391	54.878
NorthernBobwhite_SimpleContig_ 394	392	12139	6690	5449	1474	3520	4120	2950	272.152	32.393	2065	119	2888	1958.69	712.829	66.327
NorthernBobwhite_SimpleContig_ 395	15914	27842	14061	13781	11812	13126	619	2136	731.794	1126.28	7690	8	213	135.757	27.841	38.375
NorthernBobwhite_SimpleContig_ 396	1561	2623	1315	1308	818	1164	377	252	277.147	34.935	902	6	227	131.402	37.187	38.181
NorthernBobwhite_SimpleContig_ 397	21377	41582	20835	20747	16704	18924	1781	3989	794.726	1218.96	12929	0	595	147.386	43.3	41.189
NorthernBobwhite_SimpleContig_ 398	4500	8935	4425	4510	3066	4370	754	705	449.207	589.797	2452	5	219	145.556	28.134	44.156
NorthernBobwhite_SimpleContig_ 399	9135	15598	7772	7826	6474	7168	723	1154	672.642	1023.05	3836	4	200	133.535	23.507	36.3
NorthernBobwhite_SimpleContig_ 400	14343	30836	15440	15396	12402	14778	835	2660	715.872	1048.38	8744	0	242	160.607	31.056	44.307
NorthernBobwhite_SimpleContig_ 401	5504	11464	5723	5741	3924	5536	732	1220	571.741	901.674	3177	7	243	153.072	30.315	43.387
NorthernBobwhite_SimpleContig_ 402	4630	8533	4173	4360	3250	3794	654	794	413.638	531.42	2580	4	236	142.61	29.383	38.553
NorthernBobwhite_SimpleContig_ 403	3245	4715	2333	2382	1814	2128	348	402	335.606	351.919	1343	2	169	116.537	22.502	33.806
NorthernBobwhite_SimpleContig_ 404	1103	1494	776	718	474	572	176	267	282.135	37.613	698	9	160	106.576	29.013	32.366
NorthernBobwhite_SimpleContig_ 405	3812	6272	3168	3104	2414	2740	347	736	427.869	557.693	2051	5	197	130.742	26.532	32.817
NorthernBobwhite_SimpleContig_ 406	7614	18196	9103	9093	6940	9006	895	1263	698.335	1069.33	4280	9	306	175.05	36.914	47.111
NorthernBobwhite_SimpleContig_ 407	3047	7886	3964	3922	2646	3686	448	1065	375.822	451.897	2645	9	268	176.348	35.861	61.831
NorthernBobwhite_SimpleContig_ 408	24401	63920	31930	31990	24870	33024	905	4792	803.771	1210.93	16872	13	291	183.957	41.415	54.264
NorthernBobwhite_SimpleContig_ 409	1278	2138	1067	1071	562	956	199	409	276.093	32.992	718	8	227	127.279	51.567	39.75
NorthernBobwhite_SimpleContig_ 410	4607	8336	4226	4110	2996	3914	471	916	407.019	520.335	2798	11	200	140.291	29.293	39.852
NorthernBobwhite_SimpleContig_ 411	26373	12950	6490	6460	5144	6616	180	939	703.776	1080.44	1754	0	86	32.765	9.849	56.198
NorthernBobwhite_SimpleContig_ 412	24284	50295	25126	25169	21168	24454	654	3749	815.678	1204.3	13793	5	251	153.29	26.886	45.153
NorthernBobwhite_SimpleContig_ 413	17799	46673	23879	22794	14802	18094	5482	8039	818.606	1225.33	14916	0	6979	191.675	401.461	44.047
NorthernBobwhite_SimpleContig_ 414	6051	14390	7101	7289	5192	7034	743	1338	521.792	732.102	4016	8	255	172.854	27.899	48.736
NorthernBobwhite_SimpleContig_ 415	7551	12754	6458	6296	5112	5914	590	1076	577.187	873.369	3618	5	245	132.975	25.165	36.101
NorthernBobwhite_SimpleContig_ 416	34952	16009	8112	7897	6822	7872	162	1057	719.79	1073.54	2510	0	79	31.702	9.126	53.871
NorthernBobwhite_SimpleContig_ 417	5699	10882	5432	5450	4264	5088	569	914	481.968	699.901	3267	4	221	146.152	26.434	41.569
NorthernBobwhite_SimpleContig_ 418	3063	5942	2897	3045	1830	2708	477	899	371.615	443.479	1422	0	237	134.407	50.55	51.453
NorthernBobwhite_SimpleContig_ 419	707	1713	894	819	376	666	214	450	275.505	30.472	446	9	230	173.634	45.313	50.919
NorthernBobwhite_SimpleContig_ 420	16794	36120	18064	18056	14114	18536	775	2539	766.283	1142.07	8148	6	288	155.289	34.233	46.767
NorthernBobwhite_SimpleContig_ 421	14324	32095	16046	16049	12268	16438	441	2804	749.118	1163.06	9215	7	266	163.993	28.418	45.672
NorthernBobwhite_SimpleContig_ 422	1735	3488	1707	1781	1000	1452	474	536	278.742	34.518	1115	8	210	149.873	33.534	42.075
NorthernBobwhite_SimpleContig_ 423	2496	4849	2395	2454	1590	2084	538	613	298.473	211.242	1518	3	208	145.055	27.972	43.429
NorthernBobwhite_SimpleContig_ 424	1439	83534	41370	42164	20996	35376	6452	20306	276.078	34.098	35315	198	5633	4246.19	1062.3	45.726
NorthernBobwhite_SimpleContig_ 425	12747	19754	9916	9838	8860	9084	502	1208	706.337	1078.67	3671	1	200	123.185	23.429	33.969
NorthernBobwhite_SimpleContig_ 426	8766	3793	1899	1894	1666	1704	124	279	656.298	1109.3	596	2	68	30.841	8.718	52.795
NorthernBobwhite_SimpleContig_ 427	7994	20256	10074	10182	7574	9966	784	1808	593.907	927.973	5083	5	287	174.473	35.872	55.892
NorthernBobwhite_SimpleContig_ 428	18657	33936	17014	16922	14812	15680	630	2643	733.778	1129.24	10059	4	243	142.232	29.635	38.886
NorthernBobwhite_SimpleContig_ 429	32717	53305	26713	26592	23484	24986	706	3887	768.945	1184.92	11397	2	226	127.33	24.683	35.15
NorthernBobwhite_SimpleContig_ 430	10121	19330	9617	9713	7722	9024	789	1699	665.387	998.389	4846	0	240	145.924	30.948	41.172
NorthernBobwhite_SimpleContig_ 431	1939	3715	1899	1816	1144	1650	563	332	275.654	32.238	722	13	210	145.294	33.403	39.247
NorthernBobwhite_SimpleContig_ 432	6096	2445	1225	1220	918	1212	63	239	641.771	842.365	370	1	65	28.299	8.714	48.343
NorthernBobwhite_SimpleContig_ 433	305	327	181	146	10	92	156	67	264	16.888	73	3	128	73.374	36.327	52.787
NorthernBobwhite_SimpleContig_ 434	6050	15616	7792	7824	5812	7454	778	1513	601.936	918.759	4035	13	290	187.809	30.442	49.736
NorthernBobwhite_SimpleContig_ 435	3544	6423	3148	3275	2186	3008	423	779	397.025	504.412	2030	12	209	137.773	27.547	40.745
NorthernBobwhite_SimpleContig_ 436	1552	3269	1673	1596	956	1536	380	386	278.326	35.153	1109	2	211	150.27	37.691	48.389
NorthernBobwhite_SimpleContig_ 437	7159	14165	7060	7105	5200	7048	420	1429	625.923	923.196	3603	1	291	133.53	53.65	60.05
NorthernBobwhite_SimpleContig_ 438	29224	64915	32319	32596	27172	31834	993	4614	867.331	1259.15	15825	7	262	164.263	29.513	45.531
NorthernBobwhite_SimpleContig_ 439	5189	7972	3979	3993	2698	3472	801	957	460.548	610.389	2508	5	350	116.827	33.732	36.25
NorthernBobwhite_SimpleContig_ 440	6605	12280	6194	6086	4584	5596	706	1308	560.249	867.372	3946	2	225	140.755	29.218	41.832
NorthernBobwhite_SimpleContig_ 441	668	7779	3880	3899	1710	3106	1142	1771	275.084	32.37	2321	41	1060	827.207	217.058	55.689
NorthernBobwhite_SimpleContig_ 442	15316	32498	16262	16236	13192	15886	782	2455	783.244	1195.38	8464	9	238	159.612	28.909	42.844
NorthernBobwhite_SimpleContig_ 443	3601	7809	3897	3912	2800	3646	598	725	412.059	516.632	2694	5	247	151.802	39.827	52.791
NorthernBobwhite_SimpleContig_ 444	1578	3262	1611	1651	942	1390	344	571	278.692	34.667	1090	10	218	152.224	34.234	47.592
NorthernBobwhite_SimpleContig_ 445	25355	50720	25410	25310	21524	24386	752	3797	885.294	1287.59	13632	8	249	151.303	25.087	40.951
NorthernBobwhite_SimpleContig_ 446	6930	13683	6882	6801	5394	6410	671	1145	589.644	891.607	3544	2	223	149.715	26.631	42.41
NorthernBobwhite_SimpleContig_ 447	2362	4392	2223	2169	1374	1850	562	581	279.159	36.179	886	0	205	139.083	36.354	42.676
NorthernBobwhite_SimpleContig_ 448	6158	12499	6305	6194	4554	6088	776	1003	550.83	802.657	2485	7	225	148.233	35.552	46.996
NorthernBobwhite_SimpleContig_ 449	5956	12622	6284	6338	4608	6380	793	767	534.787	794.324	2080	2	252	152.592	43.337	47.717
NorthernBobwhite_SimpleContig_ 450	7243	20096	10101	9995	7192	10336	697	1769	578.11	893.406	5489	9	288	182.196	44.477	63.979
NorthernBobwhite_SimpleContig_ 451	8415	14044	6983	7061	5998	6464	417	1086	636.12	976.111	3602	9	240	131.04	26.105	37.944
NorthernBobwhite_SimpleContig_ 452	8616	18818	9527	9291	6492	7020	1408	3774	616.862	942.863	5931	0	1398	156.187	99.692	40.494
NorthernBobwhite_SimpleContig_ 453	7309	4014	2020	1994	1402	2130	145	316	484.364	694.527	524	1	71	35.339	9.53	59.789
NorthernBobwhite_SimpleContig_ 454	6635	19743	9982	9761	7040	9938	822	1840	559.25	797.842	4331	2	278	200.987	36.221	59.503
NorthernBobwhite_SimpleContig_ 455	2183	4661	2353	2308	1352	2034	554	696	277.771	35.192	1449	3	213	148.334	32.256	49.702
NorthernBobwhite_SimpleContig_ 456	3520	5715	2859	2856	1940	2446	508	788	405.219	511.011	1750	4	187	124.143	25.686	37.415
NorthernBobwhite_SimpleContig_ 457	9000	25502	12549	12953	9356	13180	706	2122	578.334	865.468	6244	7	298	185.974	33.437	64.356
NorthernBobwhite_SimpleContig_ 458	15872	30314	15280	15034	12780	14380	709	2289	736.292	1100.14	8232	10	244	146.622	25.184	40.575
NorthernBobwhite_SimpleContig_ 459	2799	4316	2171	2145	1496	1850	415	541	366.737	428.426	1449	6	188	120.32	28.177	34.262
NorthernBobwhite_SimpleContig_ 460	3107	4972	2466	2506	1718	2312	420	499	328.66	324.973	1026	4	166	125.992	23.829	35.661
NorthernBobwhite_SimpleContig_ 461	3281	5515	2783	2732	1774	2518	404	796	346.558	386.075	1742	5	203	128.311	26.383	38.677
NorthernBobwhite_SimpleContig_ 462	6975	13816	6943	6873	5110	6634	603	1392	590.036	905.775	4278	5	232	143.314	37.235	50.136
NorthernBobwhite_SimpleContig_ 463	8479	14804	7426	7378	5984	6762	680	1308	631.708	923.721	4204	0	220	134.409	28.012	38.554
NorthernBobwhite_SimpleContig_ 464	13970	24370	12116	12254	10424	10906	977	1945	693.725	1087.93	7917	7	504	136.265	27.216	36.686
NorthernBobwhite_SimpleContig_ 465	7743	14743	7388	7355	5404	7100	634	1538	585.342	876.141	4251	6	225	141.108	31.218	42.309
NorthernBobwhite_SimpleContig_ 466	499	4420	2202	2218	738	1308	664	1689	272.098	31.545	1956	38	754	585.261	163.597	62.124
NorthernBobwhite_SimpleContig_ 467	364	135553	68798	66755	3660	14894	22289	93997	248.557	20.504	82705	0	63793	28380.6	21344.9	39.286
NorthernBobwhite_SimpleContig_ 468	16845	29970	15022	14948	12664	14100	743	2285	729.116	1120.84	7807	5	221	136.768	23.077	38.706
NorthernBobwhite_SimpleContig_ 469	2390	3762	1886	1876	1212	1656	520	353	278.132	33.904	1119	6	196	123.204	26.144	37.071
NorthernBobwhite_SimpleContig_ 470	1711	2941	1446	1495	906	1400	401	226	274.296	30.981	972	2	186	127.5	36.623	44.886
NorthernBobwhite_SimpleContig_ 471	9031	18247	9082	9165	6868	8746	660	1880	731.849	1099.21	5953	0	226	150.594	28.483	44.115
NorthernBobwhite_SimpleContig_ 472	2949	7148	3542	3606	2050	3376	757	925	418.923	537.082	2297	11	267	165.986	35.703	56.46
NorthernBobwhite_SimpleContig_ 473	1122	2205	1041	1164	624	1166	180	223	276.59	32.888	658	4	215	137.627	50.469	50.267
NorthernBobwhite_SimpleContig_ 474	3350	5523	2753	2770	1960	2528	479	529	379.736	457.921	1827	3	186	129.63	26.421	34.985
NorthernBobwhite_SimpleContig_ 475	5006	781546	390086	391460	279282	365246	57869	75493	480.696	648.79	248734	680	15414	11723.2	1903.41	42.409
NorthernBobwhite_SimpleContig_ 476	3259	6493	3156	3337	1986	3282	415	773	304.322	244.705	1502	2	260	130.617	45.637	63.67
NorthernBobwhite_SimpleContig_ 477	19147	33833	16926	16907	14690	15654	706	2603	788.747	1216.02	9529	4	226	137.532	27.243	36.951
NorthernBobwhite_SimpleContig_ 478	11627	21555	10688	10867	9564	9764	592	1518	705.554	1073.37	5947	2	216	145.336	21.713	38.815
NorthernBobwhite_SimpleContig_ 479	5098	8806	4397	4409	3480	3892	515	877	443.552	580.925	2673	7	185	137.163	23.54	37.721
NorthernBobwhite_SimpleContig_ 480	8205	16122	8165	7957	6096	7770	728	1466	642.104	1003.84	4552	5	251	149.973	29.188	40.67
NorthernBobwhite_SimpleContig_ 481	573	896	465	431	196	278	161	258	272.092	28.899	289	10	166	120.888	34.689	39.791
NorthernBobwhite_SimpleContig_ 482	9402	3999	2048	1951	1580	1978	141	284	724.758	1116.67	616	1	62	29.799	8.858	47.937
NorthernBobwhite_SimpleContig_ 483	7502	13594	6820	6774	5244	6602	569	1103	614.838	939.506	3013	9	230	137.269	26.008	40.043
NorthernBobwhite_SimpleContig_ 484	1259	1997	921	1076	518	920	340	212	275.884	34.15	530	3	180	116.8	33.081	41.303
NorthernBobwhite_SimpleContig_ 485	6134	10999	5498	5501	4346	4966	593	1033	533.821	762.59	3957	6	203	139.203	26.085	39.811
NorthernBobwhite_SimpleContig_ 486	1380	2975	1489	1486	872	1276	380	440	278.599	35.209	1175	9	229	156.443	38.562	42.246
NorthernBobwhite_SimpleContig_ 487	1431	499777	252072	247705	147232	245884	693	103319	276.888	34.506	215577	1521	28894	24970.4	4783.85	50.804
NorthernBobwhite_SimpleContig_ 488	8782	17303	8635	8668	6696	8070	745	1694	690.756	1098.21	4807	4	243	147.139	26.727	41.813
NorthernBobwhite_SimpleContig_ 489	2920	4860	2351	2509	1630	2264	343	590	326.373	309.135	1550	1	200	122.022	32.57	45.582
NorthernBobwhite_SimpleContig_ 490	41147	34086	16972	17114	15356	16138	328	2106	759.457	1196.38	6000	3	123	65.489	13.853	35.086
NorthernBobwhite_SimpleContig_ 491	11933	10816	5392	5424	4382	5104	396	858	656.182	985.965	1789	4	110	64.008	12.723	51.337
NorthernBobwhite_SimpleContig_ 492	2742	7134	3499	3635	2130	3472	491	1013	315.558	286.884	2242	11	275	169.949	37.652	61.524
NorthernBobwhite_SimpleContig_ 493	376	388	169	219	44	128	122	92	274.273	32.646	74	2	107	73.556	24.957	46.011
NorthernBobwhite_SimpleContig_ 494	1739	3637	1820	1817	972	1564	454	625	277.537	35.151	1029	0	231	155.012	43.664	45.946
NorthernBobwhite_SimpleContig_ 495	2143	3600	1819	1781	1120	1688	271	505	279.679	35.268	622	6	175	130.196	26.57	33.178
NorthernBobwhite_SimpleContig_ 496	4793	9082	4439	4643	3224	4380	786	651	439.837	579.9	1567	2	212	140.337	27.445	43.376
NorthernBobwhite_SimpleContig_ 497	1315	2508	1231	1277	694	1046	357	403	277.135	35.281	669	5	203	141.153	31.481	37.186
NorthernBobwhite_SimpleContig_ 498	1341	2392	1230	1162	502	966	318	589	272.331	32.531	532	3	207	133.502	42.328	39.597
NorthernBobwhite_SimpleContig_ 499	24339	40918	20525	20393	17916	19562	506	2725	768.712	1182.18	7360	2	206	131.302	23.757	36.904
NorthernBobwhite_SimpleContig_ 500	40062	71115	35576	35539	31332	33434	843	5165	763.781	1161.8	20857	3	236	138.273	24.717	38.78
NorthernBobwhite_SimpleContig_ 501	2792	1152	609	543	320	542	167	118	336.512	348.015	160	2	72	28.737	8.791	49.463
NorthernBobwhite_SimpleContig_ 502	4578	6994	3494	3500	2476	2972	403	1115	422.099	546.449	2617	3	195	119.115	29.045	35.212
NorthernBobwhite_SimpleContig_ 503	4188	13127	6489	6638	4176	5960	1227	1689	376.783	453.173	2722	5	445	234.085	99.562	41.022
NorthernBobwhite_SimpleContig_ 504	5820	10397	5193	5204	3942	4814	673	934	505.613	724.972	3153	4	217	138.682	22.802	38.505
NorthernBobwhite_SimpleContig_ 505	4451	11007	5509	5498	3602	5604	665	1089	470.847	622.368	3395	6	246	170.776	39.536	53.718
NorthernBobwhite_SimpleContig_ 506	16356	26616	13351	13265	11614	12466	571	1838	749.019	1163.86	6676	5	205	128.536	23.145	35.956
NorthernBobwhite_SimpleContig_ 507	3323	6809	3403	3406	2152	3114	634	875	392.705	481.566	2139	7	221	151.768	28.303	43.094
NorthernBobwhite_SimpleContig_ 508	10233	20784	10318	10466	8120	9848	894	1800	665.223	993.132	6669	10	248	153.683	29.618	40.721
NorthernBobwhite_SimpleContig_ 509	4577	9989	4981	5008	3482	4844	605	1010	532.681	708.299	2676	5	232	159.213	29.312	44.461
NorthernBobwhite_SimpleContig_ 510	529	1078	572	506	234	382	162	293	273.88	33.047	281	4	209	151.21	56.315	46.881
NorthernBobwhite_SimpleContig_ 511	6133	10259	5090	5169	4078	4612	676	820	535.185	799.1	2916	9	211	131.708	26.938	36.882
NorthernBobwhite_SimpleContig_ 512	2875	4619	2253	2366	1532	2152	444	472	328.632	324.622	1593	3	175	123.533	22.834	38.191
NorthernBobwhite_SimpleContig_ 513	743	662	338	324	170	256	147	85	271.4	34.995	103	2	105	68.075	20.773	36.205
NorthernBobwhite_SimpleContig_ 514	1451	1725	843	882	564	696	319	142	277.206	34.129	423	2	155	96.052	30.653	34.666
NorthernBobwhite_SimpleContig_ 515	2090	3166	1529	1637	994	1276	289	590	274.915	33.336	992	11	179	117.682	30.75	34.163
NorthernBobwhite_SimpleContig_ 516	2172	4988	2479	2509	1436	2372	573	590	277.295	35.773	1057	3	232	164.868	32.615	47.928
NorthernBobwhite_SimpleContig_ 517	823	1652	845	807	408	666	227	339	276.426	35.913	577	7	205	147.481	38.391	47.388
NorthernBobwhite_SimpleContig_ 518	949	1837	897	940	440	728	289	369	276.864	35.105	436	8	203	143.683	35.473	43.414
NorthernBobwhite_SimpleContig_ 519	6533	11073	5605	5468	4392	4954	623	1049	487.762	673.643	3257	3	193	133.796	25.889	37.624
NorthernBobwhite_SimpleContig_ 520	1672	3480	1727	1753	930	1666	394	475	280.411	35.941	1121	8	214	144.98	32.886	51.854
NorthernBobwhite_SimpleContig_ 521	608	1090	470	620	220	402	174	292	274.173	31.941	177	1	182	109.76	45.09	66.941
NorthernBobwhite_SimpleContig_ 522	27881	12688	6322	6366	5226	6368	133	890	661.577	1012.68	1971	1	63	31.5	8.198	53.033
NorthernBobwhite_SimpleContig_ 523	7453	14067	7074	6993	5538	6602	664	1199	670.191	1008.86	3555	9	241	142.819	26.649	39.635
NorthernBobwhite_SimpleContig_ 524	1743	289430	145858	143572	87182	126808	31047	42960	276.455	34.22	117815	724	15753	12408.4	2332.93	46.185
NorthernBobwhite_SimpleContig_ 525	5244	11303	5662	5641	3938	5350	762	1203	463.289	612.111	3093	4	246	152.761	34.719	50.973
NorthernBobwhite_SimpleContig_ 526	26436	54370	27084	27286	22282	26830	706	4286	795.82	1196.95	12900	0	273	153.658	33.311	42.688
NorthernBobwhite_SimpleContig_ 527	10487	18161	9131	9030	7428	8448	586	1605	758.803	1170.88	3280	0	214	134.521	25.621	36.922
NorthernBobwhite_SimpleContig_ 528	3925	7160	3539	3621	2366	2970	541	1251	418.393	536.442	1623	0	357	133.055	47.12	41.427
NorthernBobwhite_SimpleContig_ 529	16458	14888	7439	7449	6044	6672	631	1472	731.564	1107.82	3012	0	637	69.315	32.767	36.183
NorthernBobwhite_SimpleContig_ 530	348	25254	12917	12337	1966	7402	2028	13742	264.07	26.476	7203	343	6529	4661.69	1537.21	64.655
NorthernBobwhite_SimpleContig_ 531	11618	17541	8770	8771	7956	7760	445	1311	617.685	935.857	4262	4	200	120.984	20.798	34.094
NorthernBobwhite_SimpleContig_ 532	4208	9861	4840	5021	3302	4650	697	1172	479.913	636.662	2323	8	245	173.549	30.07	45.984
NorthernBobwhite_SimpleContig_ 533	1246	60803	30945	29858	16274	28868	5996	9354	276.988	34.572	13524	182	4149	3237.11	655.137	59.872
NorthernBobwhite_SimpleContig_ 534	1635	3187	1588	1599	996	1354	396	422	278.028	35.916	1094	6	230	148.676	34.745	40.795
NorthernBobwhite_SimpleContig_ 535	4023	6211	3119	3092	2322	2552	470	845	397.592	500.665	2515	5	188	123.744	24.417	36.341
NorthernBobwhite_SimpleContig_ 536	381	728	373	355	78	232	28	388	263.692	29.343	141	12	207	134.43	52.484	48.294
NorthernBobwhite_SimpleContig_ 537	725	1829	916	913	400	792	284	346	273.905	34.003	654	5	247	181.077	47.614	52.414
NorthernBobwhite_SimpleContig_ 538	694	1353	689	664	290	524	108	416	275.303	33.036	322	4	189	143.829	37.914	46.83
NorthernBobwhite_SimpleContig_ 539	2567	5635	2802	2833	1714	2652	646	601	313.499	269.696	1685	2	237	159.875	35.721	45.578
NorthernBobwhite_SimpleContig_ 540	394	364	189	175	38	114	141	68	266.684	23.045	56	3	105	65.805	23.875	50.761
NorthernBobwhite_SimpleContig_ 541	4002	7633	3823	3810	2826	3286	519	946	454.301	604.942	2783	7	210	147.58	26.625	40.03
NorthernBobwhite_SimpleContig_ 542	9338	18910	9534	9376	7372	8880	671	1894	711.875	1065.86	5210	4	270	151.443	28.052	42.322
NorthernBobwhite_SimpleContig_ 543	2895	6516	3251	3265	2126	3106	611	641	327.857	324.637	2120	9	272	168.994	32.563	44.698
NorthernBobwhite_SimpleContig_ 544	6244	12584	6187	6397	4972	5768	682	1101	579.386	827.119	3969	4	222	150.502	27.727	43.354
NorthernBobwhite_SimpleContig_ 545	2227	4064	2058	2006	1280	1790	408	579	278.533	34.628	1386	4	211	138.319	30.458	37.854
NorthernBobwhite_SimpleContig_ 546	708	1308	674	634	344	492	192	273	274.378	35.048	359	11	175	133.185	37.404	48.305
NorthernBobwhite_SimpleContig_ 547	2127	3948	1961	1987	1304	1812	381	434	274.733	35.076	1330	2	208	142.091	35.839	40.433
NorthernBobwhite_SimpleContig_ 548	1764	4096	2094	2002	1142	1792	552	590	277.865	33.567	1719	10	227	168.163	30.873	48.073
NorthernBobwhite_SimpleContig_ 549	1506	63531	32024	31507	17224	31776	5604	8573	275.861	33.961	18319	180	3801	2818.05	572.155	59.097
NorthernBobwhite_SimpleContig_ 550	3339	3445	1709	1736	984	1520	366	553	276.516	35.234	634	5	118	77.031	17.376	44.025
NorthernBobwhite_SimpleContig_ 551	10949	12445	6342	6103	4136	4670	1089	2490	622.805	937.535	4070	0	1474	84.175	100.889	37.885
NorthernBobwhite_SimpleContig_ 552	5468	10753	5435	5318	4100	4944	724	929	582.388	848.031	2277	6	229	147.804	29.828	41.734
NorthernBobwhite_SimpleContig_ 553	13489	30915	15540	15375	11902	15854	581	2438	724.712	1115.74	7736	8	287	163.765	33.219	49.64
NorthernBobwhite_SimpleContig_ 554	18984	31623	15732	15891	13286	15040	482	2653	714.398	1076.95	9079	7	205	130.05	23.233	37.337
NorthernBobwhite_SimpleContig_ 555	12049	24920	12406	12514	10190	11954	670	1981	711.65	1049.53	6338	2	273	156.501	27.284	41.663
NorthernBobwhite_SimpleContig_ 556	11711	10701	5325	5376	4440	5056	391	749	797.238	1256.99	2030	0	139	70.198	16.562	38.4
NorthernBobwhite_SimpleContig_ 557	1193	983	478	505	318	420	134	106	274.692	35.179	201	3	97	64.455	15.17	37.217
NorthernBobwhite_SimpleContig_ 558	6429	16272	8135	8137	5630	8346	818	1378	579.924	842.386	4450	2	277	168.891	54.708	61.425
NorthernBobwhite_SimpleContig_ 559	1292	3656	1801	1855	970	1694	351	619	276.586	35.198	706	10	246	187.408	37.681	61.687
NorthernBobwhite_SimpleContig_ 560	5097	12018	5912	6106	4270	5730	874	1082	510.942	723.503	3413	10	247	174.479	30.321	44.85
NorthernBobwhite_SimpleContig_ 561	10119	17051	8516	8535	7094	7978	450	1441	710.163	1084.67	4810	11	226	131.671	23.866	36.851
NorthernBobwhite_SimpleContig_ 562	3459	5712	2835	2877	2124	2540	608	406	402.999	506.768	1257	8	189	126.306	31.311	38.335
NorthernBobwhite_SimpleContig_ 563	2505	4417	2183	2234	1386	2136	466	409	288.053	155.719	750	3	197	136.45	31.564	37.485
NorthernBobwhite_SimpleContig_ 564	12432	21239	10659	10580	8988	10004	424	1714	709.927	1137.24	4752	9	266	133.777	28.879	37.428
NorthernBobwhite_SimpleContig_ 565	329	353	194	159	26	82	178	63	265.462	28.715	68	2	113	76.793	31.217	56.231
NorthernBobwhite_SimpleContig_ 566	11175	22332	11351	10981	8220	10580	1064	2354	525.922	739.268	6501	5	233	149.177	29.154	43.857
NorthernBobwhite_SimpleContig_ 567	1319	2371	1171	1200	610	1092	398	255	276.485	33.627	754	4	191	131.304	39.271	40.409
NorthernBobwhite_SimpleContig_ 568	6030	11840	5898	5942	4462	5594	595	1123	548.048	765.432	3332	3	253	148.566	27.052	41.874
NorthernBobwhite_SimpleContig_ 569	11628	25688	12901	12787	9830	12982	812	1925	789.137	1199.24	6540	9	263	158.739	33.725	47.979
NorthernBobwhite_SimpleContig_ 570	10672	20366	10185	10181	8198	9590	455	2025	670.669	1028.81	5894	8	222	145.669	29.594	39.786
NorthernBobwhite_SimpleContig_ 571	4141	7869	3949	3920	2826	3672	582	744	490.299	648.517	2564	8	203	144.019	28.12	41.439
NorthernBobwhite_SimpleContig_ 572	45104	45719	22994	22725	19528	22462	379	3143	837.558	1237.34	7974	1	135	75.976	15.839	42.863
NorthernBobwhite_SimpleContig_ 573	8952	19930	10075	9855	7906	9560	805	1553	745.525	1100.64	5074	6	247	163.993	27.11	44.984
NorthernBobwhite_SimpleContig_ 574	7001	13847	7004	6843	5214	6454	770	1339	619.971	901.739	4697	11	243	150.291	28.092	41.037
NorthernBobwhite_SimpleContig_ 575	11785	20034	10047	9987	8458	9130	603	1734	644.633	974.958	5809	8	220	133.516	25.45	38.6
NorthernBobwhite_SimpleContig_ 576	10371	20266	10157	10109	8398	9410	625	1742	757.365	1128.91	5515	7	244	149.119	27.262	40.112
NorthernBobwhite_SimpleContig_ 577	7339	443882	222535	221347	155128	197388	29615	59668	609.068	927.003	112284	0	29997	4452.68	2236.66	43.957
NorthernBobwhite_SimpleContig_ 578	2109	4062	2043	2019	1216	1848	456	524	277.14	34.235	1410	7	205	144.842	29.27	40.778
NorthernBobwhite_SimpleContig_ 579	348	4074	2118	1956	370	1106	828	1746	262.6	24.909	1499	67	1205	895.184	328.716	40.805
NorthernBobwhite_SimpleContig_ 580	3887	6254	3105	3149	2246	2914	443	617	438.213	574.236	2143	9	200	126.006	26.539	36.275
NorthernBobwhite_SimpleContig_ 581	2863	6188	3072	3116	1850	2858	610	841	348.458	383.647	1127	2	260	156.898	37.151	46.49
NorthernBobwhite_SimpleContig_ 582	74637	146514	73358	73156	62894	72036	1228	9595	842.383	1246.74	25768	0	263	148.286	26.85	41.343
NorthernBobwhite_SimpleContig_ 583	22095	39633	19885	19748	15614	18712	1821	3289	601.918	929.246	9164	3	493	135.003	31.344	39.507
NorthernBobwhite_SimpleContig_ 584	5775	10192	5189	5003	4002	4646	549	945	468.121	635.674	3164	5	212	137.186	28.986	38.563
NorthernBobwhite_SimpleContig_ 585	2983	6959	3415	3544	2184	3430	495	819	323.715	315.32	1573	2	249	163.367	42.516	52.933
NorthernBobwhite_SimpleContig_ 586	6556	13861	6951	6910	5110	6742	724	1224	517.592	760.295	3760	12	243	158.805	32.972	43.99
NorthernBobwhite_SimpleContig_ 587	2106	4648	2349	2299	1402	2118	487	614	277.261	33.866	1356	5	214	156.296	32.401	49.193
NorthernBobwhite_SimpleContig_ 588	8109	17223	8679	8544	5752	7430	1692	2263	616.076	973.883	6433	6	1818	154.971	130.39	39.672
NorthernBobwhite_SimpleContig_ 589	12451	23270	11611	11659	9008	11430	664	2049	752.795	1166.69	6534	6	248	140.586	29.406	40.302
NorthernBobwhite_SimpleContig_ 590	6866	11608	5834	5774	4820	5182	750	793	487.633	715.446	2339	15	215	134.179	23.571	37.984
NorthernBobwhite_SimpleContig_ 591	20622	47666	23898	23768	19260	23348	976	3840	782.589	1177.72	13199	5	266	168.13	31.256	47.891
NorthernBobwhite_SimpleContig_ 592	7224	14324	7166	7158	5700	6752	717	1081	649.136	963.196	4289	6	224	151.106	28.588	41.417
NorthernBobwhite_SimpleContig_ 593	3724	7075	3593	3482	2634	3220	627	558	396.052	494.685	1813	6	228	146.066	25.524	41.541
NorthernBobwhite_SimpleContig_ 594	4154	7807	3923	3884	3012	3658	508	594	417.281	540.556	1737	5	217	146.982	26.995	40.515
NorthernBobwhite_SimpleContig_ 595	6190	10850	5470	5380	4188	4864	624	1126	503.259	739.231	3617	3	210	137.711	25.396	36.914
NorthernBobwhite_SimpleContig_ 596	16471	35535	17639	17896	14154	17712	795	2695	755.29	1123.91	8574	5	257	160.154	26.212	43.325
NorthernBobwhite_SimpleContig_ 597	8664	14250	7203	7047	5628	6716	372	1453	649.625	1010.29	4855	7	208	128.004	24.908	36.207
NorthernBobwhite_SimpleContig_ 598	8464	13385	6702	6683	5568	6090	680	981	561.149	864.846	2876	3	219	124.904	25.561	36.153
NorthernBobwhite_SimpleContig_ 599	3777	7058	3533	3525	2494	3238	591	695	405.536	509.835	1796	6	223	141.816	26.519	39.396
NorthernBobwhite_SimpleContig_ 600	3818	7653	3802	3851	2568	3468	666	920	432.147	559.62	2294	7	216	148.644	31.567	44.316
NorthernBobwhite_SimpleContig_ 601	2464	5799	2916	2883	1816	2636	518	799	286.771	131.847	2119	9	235	169.796	33.846	49.107
NorthernBobwhite_SimpleContig_ 602	19705	8970	4484	4486	3830	4330	165	593	851.593	1304.79	1424	1	75	31.558	8.928	52.946
NorthernBobwhite_SimpleContig_ 603	27471	55746	27928	27818	23512	26946	595	4412	820.531	1213.81	13436	7	247	152.208	27.133	42.736
NorthernBobwhite_SimpleContig_ 604	13804	33784	16869	16915	13454	16538	997	2612	810.56	1234.68	9777	9	283	176.455	30.554	49.891
NorthernBobwhite_SimpleContig_ 605	5906	11440	5739	5701	4322	5350	678	1041	537.603	747.875	3427	9	220	146.475	29.133	42.228
NorthernBobwhite_SimpleContig_ 606	15383	26683	13351	13332	11276	12524	754	2020	717.286	1075.59	6648	5	219	135.361	24.956	37.288
NorthernBobwhite_SimpleContig_ 607	9197	16211	8119	8092	6622	7674	530	1297	630.986	931.479	4512	4	235	137.439	25.381	38.197
NorthernBobwhite_SimpleContig_ 608	480	139	73	66	14	60	33	31	284	27.449	27	1	32	19.265	7.043	34.375
NorthernBobwhite_SimpleContig_ 609	2073	651	317	334	174	254	129	88	275.759	36.735	90	0	61	22.103	9.995	34.588
NorthernBobwhite_SimpleContig_ 610	444	147	71	76	28	50	8	61	266.714	37.012	32	1	45	23.421	9.854	57.207
NorthernBobwhite_SimpleContig_ 611	392	661	393	268	154	250	73	181	268.61	30.722	90	2	187	106.446	44.986	71.684
NorthernBobwhite_SimpleContig_ 612	3321	5944	2952	2992	1918	2766	450	777	405.227	521.179	1871	5	204	131.823	33.307	41.072
NorthernBobwhite_SimpleContig_ 613	1232	9885	4973	4912	2630	3794	1663	1752	276.349	34.353	2256	20	1153	603.961	176.569	41.802
NorthernBobwhite_SimpleContig_ 614	7460	13905	6974	6931	5654	6404	518	1253	575.944	894.408	4171	7	215	144.005	26.035	40.094
NorthernBobwhite_SimpleContig_ 615	4957	11031	5511	5520	3900	5500	616	964	497.224	666.918	3336	8	273	158.577	49.323	49.586
NorthernBobwhite_SimpleContig_ 616	10389	18641	9397	9244	7828	8548	622	1556	670.28	1069.22	6313	5	209	140.054	22.399	39.551
NorthernBobwhite_SimpleContig_ 617	37441	35719	17826	17893	15798	16862	385	2485	883.895	1296.23	6082	1	146	72.346	16.623	39.986
NorthernBobwhite_SimpleContig_ 618	11574	22095	11096	10999	9090	10518	657	1729	760.62	1167.64	5619	6	231	145.389	27.268	38.716
NorthernBobwhite_SimpleContig_ 619	3493	6894	3477	3417	2350	3348	479	691	396.142	496.755	1358	4	239	151.17	31.933	40.481
NorthernBobwhite_SimpleContig_ 620	41878	37870	18915	18955	16240	18560	464	2423	823.603	1227.75	6407	1	129	69.07	14.33	39.288
NorthernBobwhite_SimpleContig_ 621	18853	39040	19514	19526	16648	18472	758	2984	819.495	1212.38	9559	5	270	155.404	28.145	41.808
NorthernBobwhite_SimpleContig_ 622	4982	10852	5463	5389	3588	5232	724	1261	530.154	704.194	3422	0	243	156.694	34.686	47.471
NorthernBobwhite_SimpleContig_ 623	3755	9483	4782	4701	2938	4748	926	819	396.633	497.635	2480	11	253	179.972	30.567	50.786
NorthernBobwhite_SimpleContig_ 624	66316	66298	33143	33155	29004	31694	752	4529	834.988	1224.05	11748	2	273	75.901	17.482	40.422
NorthernBobwhite_SimpleContig_ 625	2674	5221	2631	2590	1674	2402	504	615	340.054	363.484	1831	5	205	146.493	27.822	40.389
NorthernBobwhite_SimpleContig_ 626	60334	112482	56307	56175	49632	53900	1161	7282	854.875	1263.61	19377	8	256	143.335	24.475	38.468
NorthernBobwhite_SimpleContig_ 627	4499	12383	6089	6294	4266	6082	609	1359	434.481	561.091	3501	3	253	186.583	27.795	60.814
NorthernBobwhite_SimpleContig_ 628	1498	3522	1773	1749	940	1600	373	601	272.481	33.065	1056	8	233	167.803	35.56	51.001
NorthernBobwhite_SimpleContig_ 629	394	628	298	330	56	134	146	289	271.643	30.914	168	5	224	109.602	41.213	45.685
NorthernBobwhite_SimpleContig_ 630	3389	6244	3149	3095	2056	2894	643	618	365.93	426.985	1537	3	214	139.656	37.889	39.717
NorthernBobwhite_SimpleContig_ 631	3084	4818	2390	2428	1672	2076	548	502	353.492	390.021	1501	1	188	119.907	27.237	35.7
NorthernBobwhite_SimpleContig_ 632	13021	28667	14263	14404	11410	14100	787	2225	784.585	1192.76	7752	1	247	158.03	30.57	49.282
NorthernBobwhite_SimpleContig_ 633	5668	12963	6450	6513	4592	6180	818	1299	548.977	768.168	3608	6	244	165.055	26.138	46.789
NorthernBobwhite_SimpleContig_ 634	3611	6309	3183	3126	2250	2802	481	747	398.605	502.648	1973	4	198	133.759	27.118	39.989
NorthernBobwhite_SimpleContig_ 635	3328	1834	888	946	650	810	148	218	359.449	412.091	324	2	79	37.678	11.99	54.567
NorthernBobwhite_SimpleContig_ 636	11529	25411	12673	12738	10274	12006	804	2184	726.51	1129.16	7505	8	257	163.336	31.664	45.078
NorthernBobwhite_SimpleContig_ 637	2653	4735	2335	2400	1544	2102	483	578	291.714	171.257	1557	6	199	135.381	30.855	40.784
NorthernBobwhite_SimpleContig_ 638	1840	4716	2393	2323	1540	2302	582	268	276.348	35.564	864	4	263	180.857	53.238	56.576
NorthernBobwhite_SimpleContig_ 639	3969	9046	4542	4504	2960	4482	641	920	407.018	522.987	2757	3	294	165.517	40.598	47.417
NorthernBobwhite_SimpleContig_ 640	3068	6615	3344	3271	2236	3072	602	665	367.633	430.528	1756	9	228	157.472	29.925	46.121
NorthernBobwhite_SimpleContig_ 641	1601	244289	122379	121910	71022	106634	20620	44872	276.385	34.093	78982	506	15520	11440.2	2683.69	43.285
NorthernBobwhite_SimpleContig_ 642	3934	6524	3259	3265	2398	2950	499	632	457.244	604.815	1447	7	191	127.362	23.581	38.638
NorthernBobwhite_SimpleContig_ 643	10453	24872	12552	12320	9420	12592	888	1849	717.356	1120.31	6253	2	281	168.825	34.395	50.033
NorthernBobwhite_SimpleContig_ 644	686	1184	602	582	204	480	161	335	270.549	29.36	442	4	204	127.733	47.972	44.023
NorthernBobwhite_SimpleContig_ 645	24277	45111	22506	22605	19040	21162	964	3702	815.901	1226.76	10684	0	363	141.576	29.708	39.461
NorthernBobwhite_SimpleContig_ 646	8941	18021	9014	9007	7060	8502	627	1730	677.869	1007.48	5375	4	231	152.192	28.357	41.942
NorthernBobwhite_SimpleContig_ 647	8497	16157	8142	8015	6448	7416	674	1550	703.033	1050.12	4952	7	335	143.7	27.258	39.567
NorthernBobwhite_SimpleContig_ 648	4954	11976	5918	6058	4024	6026	704	1154	464.62	613.015	2838	10	250	172.947	29.999	49.354
NorthernBobwhite_SimpleContig_ 649	7506	17551	8767	8784	6398	8588	814	1658	609.076	916.281	4364	3	267	170.058	35.647	45.297
NorthernBobwhite_SimpleContig_ 650	8127	15595	7781	7814	5872	7692	639	1321	618.544	942.661	4422	4	228	143.658	25.823	42.377
NorthernBobwhite_SimpleContig_ 651	16226	29358	14587	14771	12428	13988	521	2301	776.704	1145.07	6717	6	225	138.647	28.255	39.535
NorthernBobwhite_SimpleContig_ 652	2824	5482	2725	2757	1574	2404	701	782	334.235	347.753	1959	0	234	144.602	43.653	41.006
NorthernBobwhite_SimpleContig_ 653	22920	40749	20469	20280	17426	19502	707	2930	788.08	1203.05	10413	1	231	136.836	25.987	38.761
NorthernBobwhite_SimpleContig_ 654	27375	46856	23342	23514	20554	22166	687	3200	721.757	1129.85	11586	6	260	135.106	24.702	36.307
NorthernBobwhite_SimpleContig_ 655	19132	34999	17506	17493	14806	16692	657	2650	776.766	1163.95	9038	8	274	138.699	29.317	39.944
NorthernBobwhite_SimpleContig_ 656	18765	19888	9927	9961	8632	9556	374	1231	803.401	1181.31	3472	4	134	78.803	18.482	43.933
NorthernBobwhite_SimpleContig_ 657	12395	4848	2398	2450	1936	2192	260	432	633.747	935.735	741	1	58	28.046	8.315	48.035
NorthernBobwhite_SimpleContig_ 658	2684	4969	2558	2411	1578	2390	409	571	296.776	205.06	1301	11	208	139.579	28.716	41.505
NorthernBobwhite_SimpleContig_ 659	346	757	342	415	50	234	7	465	272	29.666	348	3	245	143.171	52.354	57.225
NorthernBobwhite_SimpleContig_ 660	2976	6514	3246	3268	2118	2944	615	798	326.971	320.257	1536	8	231	161.866	30.583	45.128
NorthernBobwhite_SimpleContig_ 661	3328	7353	3695	3658	2408	3420	594	899	385.724	481.001	1962	7	251	160.782	31.768	46.785
NorthernBobwhite_SimpleContig_ 662	2461	3548	1744	1804	1282	1334	385	531	289.115	130.098	1240	9	170	114.919	21.21	33.889
NorthernBobwhite_SimpleContig_ 663	326	195	109	86	20	60	39	76	262.8	28.449	32	4	67	46.693	15.101	34.969
NorthernBobwhite_SimpleContig_ 664	4074	6953	3537	3416	2582	3278	475	580	384.334	471.962	1707	6	193	134.153	24.927	36.622
NorthernBobwhite_SimpleContig_ 665	352	424	201	223	16	66	125	215	269.25	17.901	188	2	111	64.028	27.365	61.932
NorthernBobwhite_SimpleContig_ 666	712	1556	727	829	128	312	405	698	275.812	34.737	917	5	335	113.765	64.87	61.236
NorthernBobwhite_SimpleContig_ 667	10535	9983	4990	4993	3960	4634	526	802	749.169	1164.87	1966	1	232	71.893	21.523	39.668
NorthernBobwhite_SimpleContig_ 668	9085	16861	8501	8360	6580	7664	640	1891	701.285	1035.43	3917	0	252	140.749	36.533	39.395
NorthernBobwhite_SimpleContig_ 669	1409	3377	1683	1694	730	1318	364	949	278.312	33.81	892	3	307	158.749	53.16	54.649
NorthernBobwhite_SimpleContig_ 670	4971	10896	5884	5012	2804	4342	1519	2151	309.091	243.621	3064	0	1145	146.816	80.876	45.403
NorthernBobwhite_SimpleContig_ 671	59883	28484	14187	14297	11880	14220	170	2036	788.515	1175.96	4363	1	80	32.564	9.297	53.867
NorthernBobwhite_SimpleContig_ 672	1757	4599	2322	2277	1422	2160	444	553	276.146	33.268	1311	3	278	180.663	48.665	56.688
NorthernBobwhite_SimpleContig_ 673	2872	6960	3485	3475	2212	3086	488	1137	366.983	432.597	2525	7	244	176.693	35.721	49.826
NorthernBobwhite_SimpleContig_ 674	1611	4709	2247	2462	992	1692	455	1536	274.815	33.035	2050	0	1032	182.663	150.104	58.411
NorthernBobwhite_SimpleContig_ 675	1809	3583	1779	1804	920	1662	367	617	274.93	32.359	1025	3	212	127.286	36.999	62.576
NorthernBobwhite_SimpleContig_ 676	6062	12392	6117	6275	4304	5942	585	1488	569.226	832.759	4321	0	234	150.513	32.52	45.414
NorthernBobwhite_SimpleContig_ 677	3815	6193	3110	3083	2178	2860	302	834	404.067	510.736	1599	4	194	125.918	24.799	37.877
NorthernBobwhite_SimpleContig_ 678	4763	11272	5608	5664	3768	5596	698	1146	463.283	612.38	3734	6	269	165.863	33.697	51.795
NorthernBobwhite_SimpleContig_ 679	1269	6043	3040	3003	1704	2514	740	1063	277.58	35.675	2299	12	523	350.33	84.217	44.76
NorthernBobwhite_SimpleContig_ 680	3512	7863	3963	3900	2762	3626	639	795	428.575	565.016	2420	10	264	165.163	36.71	49.943
NorthernBobwhite_SimpleContig_ 681	5955	9422	4653	4769	3796	4150	472	953	575.934	878.616	3152	2	194	124.206	26.029	37.531
NorthernBobwhite_SimpleContig_ 682	7173	13242	6562	6680	5180	6258	607	1136	602.946	893.192	3923	3	218	139.72	25.417	39.969
NorthernBobwhite_SimpleContig_ 683	4836	8703	4375	4328	3108	3990	747	824	462.028	619.989	2714	10	247	137.624	30.087	40.447
NorthernBobwhite_SimpleContig_ 684	4837	11897	5894	6003	4224	5966	804	838	428.195	549.111	3237	1	277	168.846	52.882	60.533
NorthernBobwhite_SimpleContig_ 685	16921	29875	14992	14883	12900	14170	453	2212	775.463	1162.28	6861	9	235	135.873	25.645	37.711
NorthernBobwhite_SimpleContig_ 686	2753	4800	2371	2429	1570	2208	451	542	297.999	200.271	1442	4	210	133.064	30.633	39.375
NorthernBobwhite_SimpleContig_ 687	21138	19976	10018	9958	8458	9402	629	1380	840.638	1242.26	3534	0	232	71.481	19.54	39.871
NorthernBobwhite_SimpleContig_ 688	19233	30965	15382	15583	13912	14196	524	2190	691.995	1069.59	9422	3	205	128.895	22.564	35.387
NorthernBobwhite_SimpleContig_ 689	2614	3952	1960	1992	1296	1692	418	524	328.793	331.395	1350	0	182	116.484	30.431	36.572
NorthernBobwhite_SimpleContig_ 690	3006	5011	2487	2524	1566	2208	532	679	335.308	355.442	1931	0	206	126.081	39.301	38.39
NorthernBobwhite_SimpleContig_ 691	1740	3718	1893	1825	1048	1610	450	592	276.179	33.396	1133	0	226	157.41	44.74	46.609
NorthernBobwhite_SimpleContig_ 692	6459	17825	8912	8913	6444	9302	600	1371	515.343	782.846	4277	2	302	184.605	55.51	64.282
NorthernBobwhite_SimpleContig_ 693	6663	14778	7385	7393	5410	6986	764	1526	596.513	870.026	4163	9	291	163.388	31.827	45.16
NorthernBobwhite_SimpleContig_ 694	1700	4006	1961	2045	1102	1914	436	539	275.626	32.901	1141	7	259	165.248	43.986	51.235
NorthernBobwhite_SimpleContig_ 695	1032	1993	1017	976	470	850	367	296	277.736	33.135	738	10	233	149.503	34.989	39.729
NorthernBobwhite_SimpleContig_ 696	2053	3829	1875	1954	1080	1866	333	531	275.794	33.163	786	7	270	126.078	49.437	57.964
NorthernBobwhite_SimpleContig_ 697	537	547	277	270	118	178	137	112	267.797	30.022	111	2	118	73.881	23.948	43.203
NorthernBobwhite_SimpleContig_ 698	3383	6188	3087	3101	2204	2762	427	766	406.689	512.539	2282	3	202	140.735	28.538	40.881
NorthernBobwhite_SimpleContig_ 699	8753	18490	9264	9226	7206	8658	720	1808	769.013	1182.98	5875	8	243	155.897	25.661	44.967
NorthernBobwhite_SimpleContig_ 700	2781	5714	2867	2847	1696	2472	617	895	329.423	323.036	2051	5	236	147.207	34.5	46.134
NorthernBobwhite_SimpleContig_ 701	7154	15369	7753	7616	5816	7268	740	1451	672.454	998.49	4056	14	236	157.226	34.418	44.744
NorthernBobwhite_SimpleContig_ 702	13680	33304	16654	16650	12754	16678	717	2992	745.138	1139.16	10621	14	264	167.366	29.738	55.658
NorthernBobwhite_SimpleContig_ 703	50087	86643	43325	43318	38162	41422	994	5603	780.163	1188.68	15738	10	244	134.902	24.771	37.163
NorthernBobwhite_SimpleContig_ 704	8002	20220	10068	10152	7474	10020	800	1815	639.26	975.576	5474	12	263	180.828	32.367	49.975
NorthernBobwhite_SimpleContig_ 705	20576	33286	16671	16615	14746	15334	620	2428	733.968	1112.63	8813	8	197	127.51	23.824	35.916
NorthernBobwhite_SimpleContig_ 706	899	1441	741	700	412	606	263	157	272.175	34.353	531	5	206	122.283	47.994	38.265
NorthernBobwhite_SimpleContig_ 707	316	283	143	140	12	54	175	40	255.333	21.429	37	1	104	64.421	26.777	41.139
NorthernBobwhite_SimpleContig_ 708	4165	6442	3224	3218	2480	2846	398	687	406.337	521.955	1863	5	196	121.621	24.776	36.062
NorthernBobwhite_SimpleContig_ 709	700	23311	11127	12184	3914	8342	4544	6416	274.642	33.947	8260	80	4265	2188.94	888.462	58.429
NorthernBobwhite_SimpleContig_ 710	20891	37785	18932	18853	15828	17606	882	3261	786.252	1179.68	8435	0	411	137.624	33.36	38.801
NorthernBobwhite_SimpleContig_ 711	5522	12649	6339	6310	4492	6110	659	1326	507.139	717.997	3235	13	266	165.988	26.629	47.917
NorthernBobwhite_SimpleContig_ 712	344	652	305	347	40	194	46	370	265.2	24.001	123	12	211	131.625	46.62	54.36
NorthernBobwhite_SimpleContig_ 713	3347	6741	3391	3350	2318	3140	674	578	383.155	465.762	2161	8	226	152.87	34.04	42.546
NorthernBobwhite_SimpleContig_ 714	15417	25373	12688	12685	11022	11516	461	2250	670.823	1033.37	6976	0	201	130.816	23.841	36.382
NorthernBobwhite_SimpleContig_ 715	5864	10043	5036	5007	4140	4392	526	944	534.787	731.894	3447	2	198	135.215	23.096	36.92
NorthernBobwhite_SimpleContig_ 716	1777	3282	1590	1692	998	1468	511	286	278.687	37.722	808	6	228	140.42	35.21	37.929
NorthernBobwhite_SimpleContig_ 717	15523	37222	18492	18730	11822	12622	5121	7476	779.619	1188.9	11234	0	7543	177.615	422.877	38.002
NorthernBobwhite_SimpleContig_ 718	1853	4464	2309	2155	1442	2208	384	407	276.406	34.032	1305	1	247	164.263	52.028	54.021
NorthernBobwhite_SimpleContig_ 719	14696	25823	12984	12839	10632	12364	711	2004	789.948	1186.75	7236	6	239	135.161	24.938	38.146
NorthernBobwhite_SimpleContig_ 720	4088	7860	3927	3933	2872	3530	611	817	436.27	568.474	2233	0	205	146.647	30.127	40.142
NorthernBobwhite_SimpleContig_ 721	4824	10790	5442	5348	3690	5324	785	949	482.253	647.094	2999	6	249	164.593	31.398	46.227
NorthernBobwhite_SimpleContig_ 722	5628	11517	5758	5759	4184	5448	802	1030	567.228	799.618	3328	3	212	150.369	28.509	44.403
NorthernBobwhite_SimpleContig_ 723	1588	2892	1479	1413	922	1294	269	393	277.499	34.921	814	7	198	139.011	30.384	40.302
NorthernBobwhite_SimpleContig_ 724	921	2017	1037	980	512	832	334	331	276.355	33.334	675	11	261	162.033	47.341	42.128
NorthernBobwhite_SimpleContig_ 725	3527	8926	4442	4484	2078	2442	2145	2231	417.881	527.925	4356	7	3039	194.069	393.945	37.823
NorthernBobwhite_SimpleContig_ 726	4359	8585	4247	4338	3018	4026	685	815	432.941	565.369	2183	0	269	147.148	37.506	42.349
NorthernBobwhite_SimpleContig_ 727	1185	2161	1116	1045	626	870	264	393	276.853	36.299	595	5	193	137.805	34.86	39.241
NorthernBobwhite_SimpleContig_ 728	6035	11249	5715	5534	4432	5078	706	972	509.889	694.649	3638	4	261	145.488	28.921	40.348
NorthernBobwhite_SimpleContig_ 729	13533	23610	11835	11775	10184	10590	546	2184	720.73	1108.86	6812	6	239	136.491	24.276	38.196
NorthernBobwhite_SimpleContig_ 730	9019	14297	7216	7081	6036	6670	447	1061	629.365	981.942	4371	1	176	126.605	21.836	36.079
NorthernBobwhite_SimpleContig_ 731	9605	11183	5571	5612	4106	4676	1160	1192	750.433	1152.47	2624	0	599	84.341	46.988	42.415
NorthernBobwhite_SimpleContig_ 732	18754	32773	16290	16483	13952	15774	585	2321	765.182	1162.77	9358	6	228	135.357	25.675	37.651
NorthernBobwhite_SimpleContig_ 733	15365	7211	3636	3575	3006	3422	194	548	846.156	1165.54	1100	1	72	32.183	9.388	51.689
NorthernBobwhite_SimpleContig_ 734	5813	10590	5268	5322	3954	4842	579	1161	608.346	824.674	2918	0	218	139.011	28.49	39.584
NorthernBobwhite_SimpleContig_ 735	12820	25593	12834	12759	10466	12286	823	1891	736.293	1111.67	5428	5	237	151.344	26.186	41.599
NorthernBobwhite_SimpleContig_ 736	548	1093	549	544	256	472	129	235	270.867	30.944	177	9	209	139.732	53.486	55.292
NorthernBobwhite_SimpleContig_ 737	16814	38327	19086	19241	14808	19150	900	3278	749.092	1137.07	11245	10	272	165.073	31.365	48.174
NorthernBobwhite_SimpleContig_ 738	7166	14317	7177	7140	5594	6820	686	1155	615.175	932.606	3972	5	225	150.022	25.791	41.906
NorthernBobwhite_SimpleContig_ 739	3029	6706	3393	3313	2184	3194	561	735	350.11	390.833	1840	4	242	164.497	36.504	45.989
NorthernBobwhite_SimpleContig_ 740	6241	11997	5997	6000	4450	5450	779	1252	609.156	913.022	3507	1	264	143.753	34.133	41.932
NorthernBobwhite_SimpleContig_ 741	1558	3830	1942	1888	1006	1856	389	557	276.425	34.554	1173	6	246	171.822	36.118	52.888
NorthernBobwhite_SimpleContig_ 742	2943	11631	5885	5746	3656	4768	1371	1795	354.331	401.697	2812	0	651	297.379	78.338	40.231
NorthernBobwhite_SimpleContig_ 743	2971	4537	2296	2241	1722	1958	365	471	317.084	289.994	1270	9	187	123.525	25.627	34.769
NorthernBobwhite_SimpleContig_ 744	713	606	314	292	150	246	76	129	275.12	36.628	118	1	94	66.71	18.567	36.606
NorthernBobwhite_SimpleContig_ 745	2077	3466	1646	1820	1050	1660	276	455	277.413	34.3	785	1	204	106.662	47.688	64.949
NorthernBobwhite_SimpleContig_ 746	6557	10918	5366	5552	4226	5124	448	1062	428.159	555.463	3213	4	201	131.466	24.368	38.051
NorthernBobwhite_SimpleContig_ 747	2202	3249	1550	1699	1070	1380	329	459	278.194	36.281	964	6	158	115.929	22.533	34.832
NorthernBobwhite_SimpleContig_ 748	9691	17235	8608	8627	7196	7842	794	1315	587.073	883.199	5126	9	224	141.294	26.584	37.437
NorthernBobwhite_SimpleContig_ 749	3151	7464	3730	3734	2468	3336	859	759	355.888	404.988	2148	2	263	170.983	35.11	48.461
NorthernBobwhite_SimpleContig_ 750	357	782	412	370	74	252	54	399	264.459	28.334	128	5	237	151.207	66.233	49.86
NorthernBobwhite_SimpleContig_ 751	3959	6926	3472	3454	2382	3192	511	810	391.458	485.004	1743	4	200	134.877	26.01	38.217
NorthernBobwhite_SimpleContig_ 752	897	243100	117808	125292	62290	117506	16511	45651	278.271	34.173	45280	3	22539	16835.8	5205.31	67.224
NorthernBobwhite_SimpleContig_ 753	3189	5487	2754	2733	1892	2426	403	743	376.725	463.747	1702	5	186	132.265	24.827	37.943
NorthernBobwhite_SimpleContig_ 754	19560	46028	23095	22933	17704	23440	952	3695	800.396	1193.68	13134	19	270	169.901	31.057	47.756
NorthernBobwhite_SimpleContig_ 755	15563	39075	19626	19449	15554	18846	1284	3178	826.198	1198.1	8423	0	841	182.272	47.137	47.163
NorthernBobwhite_SimpleContig_ 756	3741	8541	4195	4346	2798	4012	640	1050	381.513	465.37	2548	6	254	168.711	34.552	46.325
NorthernBobwhite_SimpleContig_ 757	2483	4677	2343	2334	1236	2120	484	807	322.112	305.668	1241	14	252	129.555	51.652	54.652
NorthernBobwhite_SimpleContig_ 758	6495	11984	6006	5978	4568	5720	639	999	570.06	864.119	3241	5	235	142.512	29.281	38.737
NorthernBobwhite_SimpleContig_ 759	7229	12061	5995	6066	4718	5696	537	1055	621.993	939.298	2789	2	217	129.475	27.785	35.731
NorthernBobwhite_SimpleContig_ 760	3430	8590	4153	4437	2874	4248	559	862	345.53	376.056	2552	1	259	168.602	50.958	60.496
NorthernBobwhite_SimpleContig_ 761	6791	12564	6279	6285	4870	5672	811	1151	575.282	869.277	3647	8	247	141.463	34.745	39.155
NorthernBobwhite_SimpleContig_ 762	34036	79073	39510	39563	31610	40032	951	6063	860.239	1254.83	21856	3	292	166.727	31.299	49.351
NorthernBobwhite_SimpleContig_ 763	1456	518	261	257	160	216	66	71	279.062	40.354	88	1	43	25.992	9.028	41.552
NorthernBobwhite_SimpleContig_ 764	3182	1059	545	514	372	480	95	105	411.032	534.494	164	1	49	23.487	7.448	43.055
NorthernBobwhite_SimpleContig_ 765	7768	12805	6458	6347	5074	5718	586	1348	598.908	913.287	3975	0	214	128.774	24.961	36.586
NorthernBobwhite_SimpleContig_ 766	5087	7771	3861	3910	3300	3362	437	641	457.024	608.298	2824	4	180	123.402	19.859	35.07
NorthernBobwhite_SimpleContig_ 767	4009	1246	624	622	432	584	42	183	276.894	34.268	183	1	52	22.923	7.936	40.359
NorthernBobwhite_SimpleContig_ 768	440	572	281	291	84	174	69	245	269.071	30.721	93	5	134	98.814	29.627	32.045
NorthernBobwhite_SimpleContig_ 769	3223	4595	2311	2284	1572	2040	379	576	331.941	341.381	872	0	183	111.222	26.539	31.182
NorthernBobwhite_SimpleContig_ 770	6831	11957	5976	5981	4740	5472	635	1056	586.795	847.153	3475	5	210	135.127	29.133	37.374
NorthernBobwhite_SimpleContig_ 771	9421	19384	9694	9690	7458	9346	736	1748	724.148	1102.88	5373	11	234	150.025	31.473	44.847
NorthernBobwhite_SimpleContig_ 772	4811	7558	3845	3713	2920	3336	438	823	443.584	575.107	2278	6	179	124.943	22.785	36.645
NorthernBobwhite_SimpleContig_ 773	7489	14090	7041	7049	5398	6662	611	1349	585.618	881.966	3797	6	215	143.242	21.027	40.967
NorthernBobwhite_SimpleContig_ 774	2996	5605	2794	2811	1872	2552	436	718	376.392	453.363	1779	4	202	143.256	25.166	40.12
NorthernBobwhite_SimpleContig_ 775	5768	14698	7404	7294	5116	7212	923	1368	556.48	778.737	4577	7	271	180.126	34.828	50.104
NorthernBobwhite_SimpleContig_ 776	976	1614	810	804	442	736	144	287	272.977	35.126	377	2	184	129.411	36.507	35.656
NorthernBobwhite_SimpleContig_ 777	4123	7837	3861	3976	2642	3674	674	796	404.673	511.645	2796	1	226	132.609	47.968	57.482
NorthernBobwhite_SimpleContig_ 778	5665	14846	7401	7445	5228	7174	863	1516	524.148	752.388	4749	14	277	183.953	34.549	53.733
NorthernBobwhite_SimpleContig_ 779	3788	8217	4083	4134	2744	4126	552	763	443.199	576.905	2503	1	264	156.205	43.827	48.178
NorthernBobwhite_SimpleContig_ 780	3401	7477	3777	3700	2496	3492	683	764	344.833	379.92	2538	5	245	161.338	33.32	48.192
NorthernBobwhite_SimpleContig_ 781	23850	54014	27123	26891	21390	27434	687	4204	833.12	1258.23	13344	0	272	161.541	30.597	48.562
NorthernBobwhite_SimpleContig_ 782	29716	49628	24741	24887	21876	23016	553	3903	781.653	1189.43	13124	0	226	129.401	26.42	37.66
NorthernBobwhite_SimpleContig_ 783	392	551	293	258	100	148	63	239	267.62	29.439	106	7	161	105.878	36.365	30.102
NorthernBobwhite_SimpleContig_ 784	2335	3960	2028	1932	1240	1716	464	526	280.815	82.327	1080	10	187	129.933	28.251	38.587
NorthernBobwhite_SimpleContig_ 785	3098	4874	2459	2415	1740	2168	438	502	337.026	349.458	1452	0	194	123.386	35.375	37.379
NorthernBobwhite_SimpleContig_ 786	2049	4297	2179	2118	1270	1898	483	626	277.107	33.562	1413	2	213	149.815	35.314	49.878
NorthernBobwhite_SimpleContig_ 787	1949	4740	2368	2372	1404	2122	474	713	278.473	34.727	1409	14	243	174.408	31.482	51.411
NorthernBobwhite_SimpleContig_ 788	2611	5298	2613	2685	1638	2444	490	694	296.648	206.194	1320	5	238	152.455	30.715	42.053
NorthernBobwhite_SimpleContig_ 789	9556	14626	7307	7319	6466	6634	489	970	671.107	1073.44	3651	5	218	122.42	24.7	34.962
NorthernBobwhite_SimpleContig_ 790	618	189984	113877	76107	15440	38254	31314	103874	265.371	31.145	113377	0	45867	20224.3	13773	58.414
NorthernBobwhite_SimpleContig_ 791	4140	9287	4656	4631	3270	4452	652	867	375.961	459.42	2549	3	244	163.667	49.396	53.068
NorthernBobwhite_SimpleContig_ 792	2376	4715	2388	2327	1456	2184	501	553	292.613	182.411	1291	7	213	148.527	30.783	43.939
NorthernBobwhite_SimpleContig_ 793	2909	5638	2810	2828	1888	2510	599	616	311.499	274.843	1776	10	228	149.671	30.259	41.87
NorthernBobwhite_SimpleContig_ 794	1526	2456	1244	1212	816	1070	294	269	278.385	35.65	773	1	180	128.884	30.945	33.486
NorthernBobwhite_SimpleContig_ 795	5841	10411	5263	5148	3894	4796	695	962	485.619	758.777	2805	4	194	137.261	25.641	39.959
NorthernBobwhite_SimpleContig_ 796	3623	6433	3263	3170	2254	2840	555	750	360.79	424.141	1976	0	226	135.215	36.93	39.774
NorthernBobwhite_SimpleContig_ 797	2486	5341	2671	2670	1578	2446	586	712	279.284	35.249	1812	2	254	156.371	37.975	44.65
NorthernBobwhite_SimpleContig_ 798	3838	3588	1794	1794	1334	1620	301	318	429.162	554.219	611	2	118	71.586	18.294	38.119
NorthernBobwhite_SimpleContig_ 799	15787	14596	7310	7286	6058	7164	352	952	730.258	1137.79	2635	1	149	69.515	20.192	39.038
NorthernBobwhite_SimpleContig_ 800	4496	10259	5091	5168	3474	4814	731	1195	471.714	624.09	3065	9	258	168.435	29.676	44.061
NorthernBobwhite_SimpleContig_ 801	7829	15950	7972	7978	6198	7518	613	1544	727.359	1130.85	4219	2	219	151.059	24.674	43.722
NorthernBobwhite_SimpleContig_ 802	12546	28672	14312	14360	10876	14238	657	2738	766.284	1163.89	7941	0	262	160.907	31.979	50.709
NorthernBobwhite_SimpleContig_ 803	22365	48081	23985	24096	19086	24502	837	3417	778.346	1161.63	11667	0	238	156.557	27.013	47.127
NorthernBobwhite_SimpleContig_ 804	4060	6485	3290	3195	2346	2928	590	598	354.383	408.46	1470	7	229	125.61	27.39	34.236
NorthernBobwhite_SimpleContig_ 805	2922	4567	2310	2257	1622	2064	538	320	317.351	292.998	1248	7	175	124.445	24.989	34.292
NorthernBobwhite_SimpleContig_ 806	1743	3102	1576	1526	1010	1286	326	469	279.202	36.274	1094	3	181	132.951	31.088	44.119
NorthernBobwhite_SimpleContig_ 807	611	1195	609	586	304	470	210	204	271.743	31.337	300	4	206	147.511	49.648	43.535
NorthernBobwhite_SimpleContig_ 808	4309	7823	3939	3884	2844	3474	593	879	460.669	610.705	2134	0	230	136.868	33.113	40.381
NorthernBobwhite_SimpleContig_ 809	381	702	344	358	68	202	105	325	262	22.085	140	9	192	130.57	46.788	47.244
NorthernBobwhite_SimpleContig_ 810	18106	40422	20203	20219	16148	20194	727	3173	778.336	1176.51	11257	5	275	165.495	28.442	44.731
NorthernBobwhite_SimpleContig_ 811	2120	5850	2916	2934	1676	2790	603	761	276.227	34.181	1467	13	275	197.091	39.739	52.17
NorthernBobwhite_SimpleContig_ 812	1749	3028	1525	1503	1002	1304	275	437	277.397	34.628	803	6	185	134.76	30.626	38.937
NorthernBobwhite_SimpleContig_ 813	10865	17259	8681	8578	7314	8004	416	1455	655.313	1038.43	4692	0	207	125.199	23.773	36.908
NorthernBobwhite_SimpleContig_ 814	25316	25982	12996	12986	10760	12078	597	2429	804.712	1181.13	4868	0	235	77.838	18.611	40.062
NorthernBobwhite_SimpleContig_ 815	9051	16708	8282	8426	6414	7650	666	1879	655.696	989.931	5247	0	233	140.349	31.108	39.719
NorthernBobwhite_SimpleContig_ 816	5299	10684	5337	5347	3940	4962	820	894	481.818	702.842	3299	1	232	151.792	29.892	43.291
NorthernBobwhite_SimpleContig_ 817	13199	23857	11935	11922	10230	11248	432	1816	701.838	1073.9	6982	3	231	140.378	29.39	38.98
NorthernBobwhite_SimpleContig_ 818	2267	3570	1794	1776	1232	1594	298	422	278.542	35.148	1266	3	227	124.818	35.365	35.598
NorthernBobwhite_SimpleContig_ 819	9947	15865	7894	7971	6614	7426	594	1145	572.528	846.471	4120	3	217	126.52	24.988	36.483
NorthernBobwhite_SimpleContig_ 820	5221	12164	6147	6017	4276	5960	757	1121	524.148	761.828	3852	9	255	170.893	29.301	47.596
NorthernBobwhite_SimpleContig_ 821	562	27482	15450	12032	4502	11218	2255	9275	269.651	31.045	5351	48	4926	2790.98	1467.12	65.48
NorthernBobwhite_SimpleContig_ 822	13436	27624	13818	13806	11444	12978	669	2404	778.251	1200.12	7336	8	259	154.403	29.651	42.341
NorthernBobwhite_SimpleContig_ 823	655	116971	55960	61011	3368	8250	22037	82649	287.948	50.167	81532	0	35119	12091.1	11065.2	50.534
NorthernBobwhite_SimpleContig_ 824	2571	6054	2998	3056	1844	2792	786	605	290.273	164.929	1564	0	244	174.181	32.837	44.146
NorthernBobwhite_SimpleContig_ 825	370	1167	601	566	50	226	25	864	264.68	27.64	631	6	608	163.803	155.433	71.081
NorthernBobwhite_SimpleContig_ 826	2130	3467	1736	1731	1152	1470	203	628	283.422	37.456	1004	4	184	126.411	30.979	38.31
NorthernBobwhite_SimpleContig_ 827	4267	10231	5152	5079	3198	5200	707	1069	423.33	547.816	3026	1	263	167.18	50.821	54.839
NorthernBobwhite_SimpleContig_ 828	3103	2661	1381	1280	928	1144	181	394	397.091	498.927	528	2	104	58.704	15.343	54.012
NorthernBobwhite_SimpleContig_ 829	1670	3667	1795	1872	1146	1648	343	518	277.236	35.063	1114	2	228	158.046	38.871	51.138
NorthernBobwhite_SimpleContig_ 830	5633	12781	6397	6384	4480	6080	635	1527	507.512	691.739	3438	3	248	163.798	31.588	48.145
NorthernBobwhite_SimpleContig_ 831	10562	16814	8346	8468	7260	7444	593	1444	635.245	972.05	4345	8	444	127.238	32.426	34.122
NorthernBobwhite_SimpleContig_ 832	5477	7689	3868	3821	3044	3328	433	843	433.49	618.092	2645	4	178	111.813	26.221	32.134
NorthernBobwhite_SimpleContig_ 833	27808	32463	16267	16196	13476	15998	579	2264	821.456	1232.99	5597	2	156	84.371	18.241	49.209
NorthernBobwhite_SimpleContig_ 834	561	345135	176906	168229	19762	79612	10579	233219	269.236	31.942	156420	0	109321	41375.2	32278.9	49.911
NorthernBobwhite_SimpleContig_ 835	4140	7198	3510	3688	2710	3246	599	616	436.537	578.354	1954	3	216	135.802	30.032	37.222
NorthernBobwhite_SimpleContig_ 836	11764	21239	10557	10682	8836	9578	506	2195	674.163	1016.05	6695	8	262	140.801	27.522	38.881
NorthernBobwhite_SimpleContig_ 837	4523	8360	4190	4170	3156	3634	563	956	510.492	687.449	2754	3	216	139.856	27.338	41.742
NorthernBobwhite_SimpleContig_ 838	17346	28218	14206	14012	12478	12164	1383	2071	792.416	1169.03	7653	1	211	124.904	31.706	38.585
NorthernBobwhite_SimpleContig_ 839	512	668	303	365	104	208	147	207	271.173	36.207	150	2	208	93.41	49.034	42.578
NorthernBobwhite_SimpleContig_ 840	6350	10733	5312	5421	4260	4736	595	1083	602.56	902.668	3064	6	203	130.97	21.557	38.079
NorthernBobwhite_SimpleContig_ 841	386	340	192	148	56	110	116	58	261.321	28.361	72	2	122	65.264	27.341	40.933
NorthernBobwhite_SimpleContig_ 842	5159	9663	4828	4835	3660	4552	424	992	488.22	650.842	2441	2	273	143.101	34.323	39.504
NorthernBobwhite_SimpleContig_ 843	7730	20258	10222	10036	6970	9632	990	2553	669.139	1047.4	6493	11	865	185.365	54.886	49.366
NorthernBobwhite_SimpleContig_ 844	2964	5584	2792	2792	1934	2434	444	745	349.825	381.1	1703	8	251	145.553	34.555	39.777
NorthernBobwhite_SimpleContig_ 845	3267	6242	3139	3103	2130	2898	513	675	361.065	415.274	2010	8	218	146.904	25.867	38.323
NorthernBobwhite_SimpleContig_ 846	6796	12240	6175	6065	4740	5754	647	1044	536.787	798.75	3556	11	209	140.715	25.316	39.038
NorthernBobwhite_SimpleContig_ 847	4691	9222	4639	4583	3186	4306	413	1273	486.738	650.234	2693	11	252	148.569	28.086	38.926
NorthernBobwhite_SimpleContig_ 848	4907	8962	4461	4501	3490	3940	594	883	497.948	669.693	2947	12	197	140.044	22.632	38.659
NorthernBobwhite_SimpleContig_ 849	2553	6900	3434	3466	2006	3532	634	688	281.394	98.521	1720	4	271	180.231	44.704	61.144
NorthernBobwhite_SimpleContig_ 850	15538	27824	14065	13759	11344	13252	677	2426	783.273	1209.77	8809	7	253	137.04	27.174	38.486
NorthernBobwhite_SimpleContig_ 851	1009	1816	968	848	456	802	251	298	274.89	33.408	417	7	205	130.474	33.636	43.905
NorthernBobwhite_SimpleContig_ 852	3654	9818	4964	4854	3020	5002	868	877	430.266	555.736	2564	6	278	184.181	40.059	54.242
NorthernBobwhite_SimpleContig_ 853	2661	6368	3245	3123	1922	3062	748	605	307.093	247.095	1868	7	238	171.756	32.922	50.733
NorthernBobwhite_SimpleContig_ 854	8910	22960	11570	11390	8380	11774	811	1885	637.339	955.709	6108	1	279	178.038	45.35	56.038
NorthernBobwhite_SimpleContig_ 855	3462	8902	4490	4412	2792	4432	640	1001	364.09	422.189	2737	7	269	184.56	34.391	48.354
NorthernBobwhite_SimpleContig_ 856	6671	12439	6231	6208	4686	5918	791	996	593.951	884.332	3380	5	233	141.505	26.332	39.349
NorthernBobwhite_SimpleContig_ 857	9816	22280	11214	11066	8892	10530	793	1960	706.069	1086.88	4552	1	489	168.41	35.523	44.529
NorthernBobwhite_SimpleContig_ 858	3541	6807	3472	3335	2484	2872	556	857	414.717	527.973	2017	6	230	142.955	30.781	43.971
NorthernBobwhite_SimpleContig_ 859	1984	4165	2087	2078	1160	1932	429	633	277.666	34.508	991	3	225	150.402	29.4	46.573
NorthernBobwhite_SimpleContig_ 860	1051	2323	1146	1177	652	1004	266	395	279.66	35.348	550	10	251	160.219	40.278	48.335
NorthernBobwhite_SimpleContig_ 861	11628	23573	11762	11811	9112	11318	834	2185	677.148	1035.11	7614	9	245	152.717	28.387	41.099
NorthernBobwhite_SimpleContig_ 862	10282	20023	9956	10067	7968	9510	796	1658	716.475	1052.59	5507	1	216	147.584	24	40.945
NorthernBobwhite_SimpleContig_ 863	5056	9460	4753	4707	3490	4174	694	1049	512.663	682.374	2924	4	223	140.46	31.709	42.089
NorthernBobwhite_SimpleContig_ 864	6423	13051	6440	6611	5096	5900	814	1178	608.325	949.296	3406	10	224	155.974	26.35	41.507
NorthernBobwhite_SimpleContig_ 865	1753	3724	1876	1848	1100	1646	461	489	278.031	34.979	1269	2	237	149.615	42.885	54.934
NorthernBobwhite_SimpleContig_ 866	2522	6125	3039	3086	1796	2934	585	777	283.059	123.432	1494	14	245	168.14	32.746	57.018
NorthernBobwhite_SimpleContig_ 867	861	1272	623	649	344	546	123	254	275.186	36.074	418	7	162	120.571	30.48	38.095
NorthernBobwhite_SimpleContig_ 868	15389	38829	19402	19427	15130	19650	1098	2760	777.009	1166.42	6751	15	287	177.868	34.704	52.31
NorthernBobwhite_SimpleContig_ 869	7679	16804	8374	8430	6492	7998	652	1572	660.932	960.848	4134	6	251	163.559	27.567	43.391
NorthernBobwhite_SimpleContig_ 870	4353	9124	4485	4639	3350	4272	649	795	480.179	635.137	2459	1	251	156.483	33.017	42.89
NorthernBobwhite_SimpleContig_ 871	8683	13029	6442	6587	5474	5840	442	1224	669.075	1085.19	4010	4	197	119.108	23.595	33.905
NorthernBobwhite_SimpleContig_ 872	1152	29841	14952	14889	7022	12966	1730	7992	276.333	34.121	13192	84	2323	1774.75	377.187	52.951
NorthernBobwhite_SimpleContig_ 873	2094	5043	2483	2560	1360	2480	558	621	275.968	34.362	1321	13	231	170.169	31.143	53.868
NorthernBobwhite_SimpleContig_ 874	2739	6190	3180	3010	1826	2992	486	848	331.271	340.356	1400	5	241	163.088	31.917	49.471
NorthernBobwhite_SimpleContig_ 875	13559	24112	11998	12114	10390	11236	651	1681	704.346	1063.16	5517	7	235	138.721	26.246	37.54
NorthernBobwhite_SimpleContig_ 876	2256	3777	1836	1941	1246	1566	425	530	277.966	34.969	1037	6	178	128.525	23.839	38.121
NorthernBobwhite_SimpleContig_ 877	2858	5454	2694	2760	1672	2458	576	727	305.238	241.174	1831	8	218	145.251	30.395	42.652
NorthernBobwhite_SimpleContig_ 878	5741	13445	6703	6742	4522	6546	809	1500	514.371	703.389	4294	10	257	170.24	28.905	47.257
NorthernBobwhite_SimpleContig_ 879	15744	26440	13184	13256	11390	12320	557	2051	779.136	1214.76	6426	10	205	131.746	25.907	36.789
NorthernBobwhite_SimpleContig_ 880	1616	355576	177892	177684	102100	186528	560	64506	276.995	34.502	111358	630	20532	15438.4	3224.15	51.609
NorthernBobwhite_SimpleContig_ 881	4207	5897	2904	2993	1872	2738	324	935	526.389	711.6	1357	5	233	99.947	36.66	47.373
NorthernBobwhite_SimpleContig_ 882	3197	5538	2809	2729	1808	2598	517	585	376.398	451.306	1325	4	205	132.329	26.536	37.097
NorthernBobwhite_SimpleContig_ 883	4176	7128	3639	3489	2388	3352	331	1025	421.286	552.026	1544	10	240	121.268	41.096	48.108
NorthernBobwhite_SimpleContig_ 884	17672	8128	4044	4084	3376	3882	136	694	717.8	1093.15	1229	2	61	31.197	8.461	54.844
NorthernBobwhite_SimpleContig_ 885	2063	3589	1843	1746	1044	1488	453	578	277.782	34.936	1030	2	222	129.889	37.069	41.299
NorthernBobwhite_SimpleContig_ 886	4324	6504	3235	3269	2492	2862	405	714	395.948	491.168	1558	7	177	118.153	21.887	32.747
NorthernBobwhite_SimpleContig_ 887	513	892	479	413	156	326	96	308	269.346	27.242	299	7	189	131.614	46.287	42.105
NorthernBobwhite_SimpleContig_ 888	8652	15856	7865	7991	6094	7622	719	1344	613.105	960.974	4143	4	195	138.595	23.113	40.141
NorthernBobwhite_SimpleContig_ 889	4379	8076	4069	4007	2944	3820	473	793	463.808	607.747	2664	11	241	139.011	31.276	40.626
NorthernBobwhite_SimpleContig_ 890	3969	10094	4966	5128	3386	4908	576	1167	388.183	483.778	3171	4	247	175.853	33.873	55.782
NorthernBobwhite_SimpleContig_ 891	564	580	243	337	76	134	100	267	284.921	33.884	220	3	134	55.906	26.944	61.348
NorthernBobwhite_SimpleContig_ 892	10955	21130	10573	10557	8582	10026	638	1774	703.704	1061.29	6361	0	244	146.563	26.617	41.305
NorthernBobwhite_SimpleContig_ 893	537	581	286	295	134	212	79	154	274.776	30.768	184	6	133	87.121	31.132	30.168
NorthernBobwhite_SimpleContig_ 894	13552	26609	13318	13291	11024	12642	642	2166	732.842	1096.42	6965	3	237	149.311	26.348	41.079
NorthernBobwhite_SimpleContig_ 895	701	617	313	304	150	220	144	99	277.6	32.223	109	4	94	64.193	19.641	38.231
NorthernBobwhite_SimpleContig_ 896	702	616	265	351	146	184	178	107	275.26	29.951	101	1	97	66.417	19.011	38.462
NorthernBobwhite_SimpleContig_ 897	791	4830	2428	2402	1146	2074	353	1229	277.384	35.901	1869	17	588	407.573	108.759	56.89
NorthernBobwhite_SimpleContig_ 898	1274	2194	1066	1128	594	964	284	335	277.189	34.613	751	9	197	116.732	56.389	61.931
NorthernBobwhite_SimpleContig_ 899	10712	21310	10643	10667	8310	10412	619	1853	690.89	1039.53	5547	8	238	149.01	27.455	42.354
NorthernBobwhite_SimpleContig_ 900	13393	33464	16770	16694	12764	16796	1198	2528	777.223	1133.72	9280	7	284	175.486	31.97	50.504
NorthernBobwhite_SimpleContig_ 901	11265	18782	9391	9391	8002	8660	625	1410	685.544	1065.6	5074	2	190	129.91	26.713	37.346
NorthernBobwhite_SimpleContig_ 902	9236	21311	10632	10679	8148	10638	773	1655	690.702	1016.28	5400	3	255	169.31	29.138	46.395
NorthernBobwhite_SimpleContig_ 903	455	222433	111316	111117	34262	72504	20543	94009	271.234	31.767	105487	2583	42819	34064.5	10037.8	51.209
NorthernBobwhite_SimpleContig_ 904	12539	17939	9005	8934	8118	7972	416	1351	677.377	1063.68	5663	4	195	115.305	22.415	32.881
NorthernBobwhite_SimpleContig_ 905	12556	13313	6616	6697	5090	6272	707	1179	767.4	1119.83	2308	0	135	77.394	19.063	44.576
NorthernBobwhite_SimpleContig_ 906	4409	314982	157115	157867	103546	141624	27290	40883	466.79	616.688	86290	0	7011	5268.76	1343.17	44.341
NorthernBobwhite_SimpleContig_ 907	6496	11499	5769	5730	4542	5222	710	955	614.62	935.959	2687	6	214	136.413	26.833	37.792
NorthernBobwhite_SimpleContig_ 908	3679	8005	3997	4008	2774	3660	639	894	433.813	572.657	2813	4	231	164.245	33.319	44.659
NorthernBobwhite_SimpleContig_ 909	6413	11708	5911	5797	4662	5298	629	1066	591.265	900.995	4011	4	225	141.361	28.7	39.545
NorthernBobwhite_SimpleContig_ 910	6749	12331	6174	6157	4842	5764	606	1064	612.934	909.861	2578	1	211	139.826	29.609	38.672
NorthernBobwhite_SimpleContig_ 911	6371	11515	5750	5765	4396	5192	785	1088	559.979	871.786	3229	10	218	137.677	25.345	39.287
NorthernBobwhite_SimpleContig_ 912	2273	4291	2101	2190	1228	1544	716	780	277.331	33.689	1163	0	288	138.637	44.455	44.787
NorthernBobwhite_SimpleContig_ 913	29365	28620	14302	14318	12116	13866	482	2022	760.229	1118.39	5067	0	133	73.971	16.61	40.756
NorthernBobwhite_SimpleContig_ 914	1395	3205	1625	1580	876	1406	483	427	275.509	33.173	999	8	225	163.721	35.418	48.172
NorthernBobwhite_SimpleContig_ 915	402	294	151	143	36	86	57	115	257.278	28.489	56	3	73	52.46	16.288	38.806
NorthernBobwhite_SimpleContig_ 916	6477	11969	5953	6016	4532	5664	491	1222	547.557	828.39	3683	5	219	141.298	27.154	39
NorthernBobwhite_SimpleContig_ 917	2383	4330	2133	2197	1326	1976	421	584	313.383	256.989	1000	7	194	137.971	28.577	39.446
NorthernBobwhite_SimpleContig_ 918	308	340	167	173	12	84	138	104	258.667	22.088	95	2	125	73.399	30.713	40.584
NorthernBobwhite_SimpleContig_ 919	2631	6589	3301	3288	2112	3074	642	721	302.689	216.637	1482	2	262	179.593	38.244	49.297
NorthernBobwhite_SimpleContig_ 920	3814	6243	3185	3058	2070	2490	921	733	387.978	484.565	1712	4	566	121.38	40.312	36.156
NorthernBobwhite_SimpleContig_ 921	4440	6754	3334	3420	2344	3270	536	567	427.484	558.341	1561	5	207	102.315	46.309	56.081
NorthernBobwhite_SimpleContig_ 922	8009	15922	7959	7963	6284	7514	642	1397	625.58	962.18	4297	6	233	150.49	28.198	42.34
NorthernBobwhite_SimpleContig_ 923	6064	9481	4788	4693	3824	4272	578	767	538.287	800.098	2796	3	184	124.254	21.69	33.229
NorthernBobwhite_SimpleContig_ 924	792	612	298	314	184	234	121	66	275.25	35.835	124	2	101	60.788	18.464	33.965
NorthernBobwhite_SimpleContig_ 925	5257	8633	4283	4350	3400	3986	580	626	403.279	513.39	2203	6	214	129.895	25.925	36.009
NorthernBobwhite_SimpleContig_ 926	5672	12763	6430	6333	4696	6106	812	1085	539.54	782.171	2720	9	288	168.036	32.593	44.94
NorthernBobwhite_SimpleContig_ 927	4373	7148	3559	3589	2778	3146	431	761	461.716	608.531	1534	5	235	127.506	32.178	33.204
NorthernBobwhite_SimpleContig_ 928	522	621	326	295	126	206	90	195	274.905	28.567	98	5	140	93.398	29.556	27.395
NorthernBobwhite_SimpleContig_ 929	8356	13121	6605	6516	5388	5990	669	1007	593.841	944.16	3085	5	177	124.844	20.247	35.053
NorthernBobwhite_SimpleContig_ 930	6593	13338	6634	6704	5156	6372	671	1069	597.876	875.138	2419	8	227	153.077	29.197	40.482
NorthernBobwhite_SimpleContig_ 931	15786	31935	15927	16008	12920	15576	713	2559	823.378	1234.48	7560	6	268	152.057	29.342	41.271
NorthernBobwhite_SimpleContig_ 932	381	34239	16083	18156	3712	10230	2514	17622	264.354	26.709	20812	248	9557	6648.52	2841.38	41.732
NorthernBobwhite_SimpleContig_ 933	17352	35823	17882	17941	14732	17240	814	2838	812.337	1206.93	9401	0	328	154.499	27.617	42.652
NorthernBobwhite_SimpleContig_ 934	8294	15103	7562	7541	5968	6812	864	1382	671.58	1060.58	3175	0	537	138.363	41.331	38.679
NorthernBobwhite_SimpleContig_ 935	7572	18487	9253	9234	6954	8698	789	1955	639.759	956.348	5825	10	269	176.53	28.771	51.149
NorthernBobwhite_SimpleContig_ 936	13893	33049	16574	16475	12142	17488	605	2602	660.738	995.285	8228	1	286	160.123	59.833	61.844
NorthernBobwhite_SimpleContig_ 937	72145	62402	31060	31342	27334	28724	1401	4656	833.917	1255.83	11694	0	1435	66.932	37.919	36.553
NorthernBobwhite_SimpleContig_ 938	24105	56503	28247	28256	22590	28514	729	4388	863.821	1272.28	16790	6	281	168.051	31.589	49.251
NorthernBobwhite_SimpleContig_ 939	315	701	370	331	66	190	131	311	256.636	21.335	96	6	188	133.946	44.532	69.206
NorthernBobwhite_SimpleContig_ 940	14350	30170	15069	15101	11892	14440	821	2878	774.141	1150.65	9939	8	247	157.041	26.242	43.728
NorthernBobwhite_SimpleContig_ 941	4079	8052	4086	3966	2776	3926	594	712	445.168	579.911	1722	6	235	148.869	26.308	42.045
NorthernBobwhite_SimpleContig_ 942	4615	8958	4480	4478	3254	4246	660	759	472.781	628.445	2641	10	230	145.901	28.951	44.16
NorthernBobwhite_SimpleContig_ 943	16021	33133	16545	16588	13652	16382	709	2225	781.526	1167.8	7759	4	237	153.671	28.682	45.216
NorthernBobwhite_SimpleContig_ 944	8264	14832	7462	7370	6046	7088	549	1080	610.404	932.276	2750	11	241	139.325	27.334	37.5
NorthernBobwhite_SimpleContig_ 945	11111	11971	5967	6004	4740	5970	390	817	789.031	1201.12	2037	1	154	79.157	20.654	43.371
NorthernBobwhite_SimpleContig_ 946	8714	12330	6178	6152	5032	5690	464	1090	599.787	964.351	4703	5	205	112.035	25.554	33.291
NorthernBobwhite_SimpleContig_ 947	2002	5301	2703	2598	1354	2180	722	1020	276.325	33.394	1530	11	435	188.793	75.029	49.451
NorthernBobwhite_SimpleContig_ 948	10923	29668	14843	14825	10942	15490	687	2401	669.303	1022.19	7778	1	298	186.902	38.407	54.793
NorthernBobwhite_SimpleContig_ 949	64041	57908	28938	28970	25690	27388	615	3933	859.807	1273.75	10350	0	197	69.89	14.322	37.894
NorthernBobwhite_SimpleContig_ 950	40732	41612	21056	20556	16042	17608	3081	4708	782.871	1151.39	9948	0	3154	76.748	109.233	38.39
NorthernBobwhite_SimpleContig_ 951	1762	4273	2204	2069	1270	2042	431	508	277.217	35.859	1007	1	254	159.435	50.869	62.883
NorthernBobwhite_SimpleContig_ 952	4480	10115	4998	5117	3596	4748	690	1021	485.276	643.533	2552	15	235	165.462	28.857	47.232
NorthernBobwhite_SimpleContig_ 953	6965	16137	8089	8048	5764	7766	702	1836	586.362	883.598	4895	6	323	164.333	30.048	49.074
NorthernBobwhite_SimpleContig_ 954	11833	24378	12244	12134	9738	11614	732	2179	685.23	1037.65	7693	2	289	152.916	32.136	44.951
NorthernBobwhite_SimpleContig_ 955	19212	32022	16082	15940	13524	15076	655	2600	732.045	1143.3	9808	4	235	129.872	27.267	36.618
NorthernBobwhite_SimpleContig_ 956	11930	26467	13133	13334	10686	12684	729	2238	773.471	1154.59	6433	11	266	163.404	29.631	45.323
NorthernBobwhite_SimpleContig_ 957	738	1313	689	624	294	518	138	354	275.687	32.672	453	7	196	127.489	43.017	41.463
NorthernBobwhite_SimpleContig_ 958	3629	7971	3972	3999	2648	3674	502	1111	376.42	454.366	2840	5	260	161.503	37.374	47.947
NorthernBobwhite_SimpleContig_ 959	17113	35761	17775	17986	14790	17112	740	2912	793.244	1188.94	11408	4	246	156.268	28.317	43.528
NorthernBobwhite_SimpleContig_ 960	23556	38396	19162	19234	17040	17684	721	2769	697.969	1084.92	9400	7	247	128.892	22.488	36.619
NorthernBobwhite_SimpleContig_ 961	23023	10036	5027	5009	4148	5010	117	697	747.901	1137.07	1522	1	74	30.859	8.671	50.41
NorthernBobwhite_SimpleContig_ 962	2334	3932	2004	1928	1286	1692	410	525	277.249	35.835	1257	10	200	131.753	27.593	38.56
NorthernBobwhite_SimpleContig_ 963	2267	3822	1958	1864	1146	1606	525	526	276.703	35.289	1214	4	203	130.511	28.436	38.73
NorthernBobwhite_SimpleContig_ 964	6118	12725	6430	6295	4634	6078	625	1328	537.973	781.96	3995	5	239	152.922	31.754	45.865
NorthernBobwhite_SimpleContig_ 965	1213	2855	1388	1467	752	1162	437	490	275.178	34.309	800	6	220	169.938	35.638	47.486
NorthernBobwhite_SimpleContig_ 966	3974	7291	3657	3634	2564	3294	627	766	425.333	551.498	1940	5	205	140.53	28.135	41.092
NorthernBobwhite_SimpleContig_ 967	1843	3246	1667	1579	1066	1324	394	449	275.598	32.943	909	3	199	136.459	31.855	36.191
NorthernBobwhite_SimpleContig_ 968	1497	3396	1625	1771	1042	1682	305	342	275.44	34.335	834	1	264	154.632	62.17	56.847
NorthernBobwhite_SimpleContig_ 969	4961	11180	5573	5607	3984	5566	592	983	507.436	671.379	2677	2	234	163.826	30.762	47.148
NorthernBobwhite_SimpleContig_ 970	1203	2280	1122	1158	622	1032	235	381	276.608	35.085	746	3	213	141.691	34.301	43.059
NorthernBobwhite_SimpleContig_ 971	6155	12673	6176	6497	4782	5828	758	1234	599.072	917.636	4145	14	222	153.639	27.646	43.558
NorthernBobwhite_SimpleContig_ 972	6368	12664	6298	6366	4634	5910	792	1274	605.429	933.599	3809	7	231	149.336	26.906	40.704
NorthernBobwhite_SimpleContig_ 973	1301	3662	1912	1750	976	1642	179	847	280.34	36.594	775	7	253	184.375	35.656	56.879
NorthernBobwhite_SimpleContig_ 974	2463	4898	2353	2545	1380	2040	618	839	288.623	156.116	1446	9	224	143.715	40.419	47.016
NorthernBobwhite_SimpleContig_ 975	1037	2437	1255	1182	658	1120	267	375	276.237	34.766	765	6	242	172.922	46.617	46.577
NorthernBobwhite_SimpleContig_ 976	3022	8011	4113	3898	2822	4134	422	575	348.374	384.996	1942	1	260	167.172	43.681	67.968
NorthernBobwhite_SimpleContig_ 977	10796	24320	12314	12006	8708	10142	1713	3649	644.968	1002.51	7691	4	1062	167.666	94.171	41.284
NorthernBobwhite_SimpleContig_ 978	4562	11645	5881	5764	3918	5604	913	1160	483.053	636.231	3421	5	269	178.397	34.195	49.934
NorthernBobwhite_SimpleContig_ 979	5967	5317	2660	2657	1964	2502	376	454	444.436	615.363	979	2	112	69.117	13.755	38.545
NorthernBobwhite_SimpleContig_ 980	5736	9690	4957	4733	3674	4474	635	858	491.745	702.638	2850	3	197	132.374	26.83	36.96
NorthernBobwhite_SimpleContig_ 981	3026	5529	2764	2765	1890	2522	355	730	377.967	459.101	1468	8	222	138.536	24.498	39.722
NorthernBobwhite_SimpleContig_ 982	354	26522	12572	13950	2524	7424	6320	10124	263.492	26.023	8310	521	8262	5666.08	2222.29	42.373
NorthernBobwhite_SimpleContig_ 983	1143	2135	1050	1085	546	826	313	439	271.689	34.167	704	7	241	132.999	50.576	47.857
NorthernBobwhite_SimpleContig_ 984	4364	9483	4730	4753	3230	4548	677	983	483.227	633.274	3231	7	251	154.137	32.027	49.198
NorthernBobwhite_SimpleContig_ 985	13740	29801	14890	14911	12206	14346	655	2447	754.546	1139.31	9503	6	261	159.616	32.657	46.907
NorthernBobwhite_SimpleContig_ 986	43252	18746	9363	9383	8112	9134	202	1185	755.435	1075.18	2904	1	68	30.613	8.553	50.823
NorthernBobwhite_SimpleContig_ 987	6006	16321	8197	8124	5942	8060	342	1894	516.228	762.611	5189	1	316	188.439	42.939	57.409
NorthernBobwhite_SimpleContig_ 988	2715	6278	3182	3096	1956	2924	547	822	322.81	293.489	1616	10	235	168.53	31.012	45.856
NorthernBobwhite_SimpleContig_ 989	569	1351	722	629	178	422	285	458	277.315	34.027	391	12	269	165.879	61.217	55.009
NorthernBobwhite_SimpleContig_ 990	357	563	272	291	72	186	216	84	273.139	32.891	98	9	162	107.902	41.243	57.983
NorthernBobwhite_SimpleContig_ 991	12347	5301	2655	2646	2096	2624	132	424	701.072	944.539	856	1	69	29.937	8.217	51.47
NorthernBobwhite_SimpleContig_ 992	2239	5559	2779	2780	1622	2612	556	750	282.004	73.379	1741	12	253	174.393	32.268	49.665
NorthernBobwhite_SimpleContig_ 993	5616	11745	5826	5919	4110	5732	638	1209	512.465	705.802	3934	3	233	151.41	34.888	47.899
NorthernBobwhite_SimpleContig_ 994	7554	17606	8760	8846	6406	8882	907	1336	639.202	972.834	4610	5	257	164.274	31.137	51.046
NorthernBobwhite_SimpleContig_ 995	8735	14536	7321	7215	5768	6578	457	1662	622.825	1001.54	3172	0	212	128.972	27.934	36.623
NorthernBobwhite_SimpleContig_ 996	6831	16091	8033	8058	6118	7968	665	1261	555.933	863.17	5009	1	283	166.03	45.396	54.004
NorthernBobwhite_SimpleContig_ 997	2026	3820	1979	1841	920	1160	760	955	276.022	35.65	1694	0	719	138.439	103.453	35.044
NorthernBobwhite_SimpleContig_ 998	17791	31979	16252	15727	13488	14918	840	2552	747.528	1137.7	7991	0	238	139.838	28.296	38.272
NorthernBobwhite_SimpleContig_ 999	12456	30497	15307	15190	11672	15396	952	2332	776.948	1163.19	7381	0	302	173.72	36.911	49.599
NorthernBobwhite_SimpleContig_ 1000	3894	14806	7426	7380	5180	6636	1089	1832	408.407	518.314	3519	14	560	289.303	58.533	40.96
NorthernBobwhite_SimpleContig_ 1001	5986	11672	5937	5735	4192	5612	707	1110	614.759	895.57	3248	4	237	144.395	31.125	41.881
NorthernBobwhite_SimpleContig_ 1002	7598	13950	7029	6921	5392	6690	580	1225	646.852	974.773	3789	8	218	140.872	27.568	38.708
NorthernBobwhite_SimpleContig_ 1003	3111	5365	2702	2663	1830	2588	410	522	368.118	433.137	1424	5	192	133.262	25.769	39.473
NorthernBobwhite_SimpleContig_ 1004	7447	14810	7394	7416	5508	7070	823	1337	699.592	1039.05	2962	0	239	145.321	33.391	44.716
NorthernBobwhite_SimpleContig_ 1005	309	265	144	121	14	70	126	51	259.286	18.866	45	3	104	60.945	27.213	35.599
NorthernBobwhite_SimpleContig_ 1006	1660	3341	1692	1649	1018	1340	392	579	277.642	33.848	1120	5	243	151.943	39.666	39.518
NorthernBobwhite_SimpleContig_ 1007	798	493	240	253	142	192	49	109	277.423	30.406	97	1	79	50.732	13.96	30.326
NorthernBobwhite_SimpleContig_ 1008	522	862	460	402	186	312	128	232	274.194	32.371	162	11	183	120.201	42.667	44.636
NorthernBobwhite_SimpleContig_ 1009	11935	25215	12615	12600	10196	12178	399	2304	768.824	1172.24	5212	2	255	158.874	32.594	41.684
NorthernBobwhite_SimpleContig_ 1010	11351	23487	11674	11813	9380	11056	812	2108	766.036	1149.47	7012	0	238	154.668	28.767	41.899
NorthernBobwhite_SimpleContig_ 1011	1549	3063	1521	1542	986	1340	414	307	276.641	34.603	623	2	217	147.923	34.721	44.158
NorthernBobwhite_SimpleContig_ 1012	3906	7701	3847	3854	2826	3406	657	763	425.066	552.605	2484	2	220	149.437	30.865	43.164
NorthernBobwhite_SimpleContig_ 1013	4103	8443	4134	4309	2860	3926	628	988	413.365	537.703	2374	7	222	152.777	28.95	44.772
NorthernBobwhite_SimpleContig_ 1014	19538	37651	18763	18888	15856	17914	682	3029	765.021	1144.91	9370	7	231	146.549	26.854	41.069
NorthernBobwhite_SimpleContig_ 1015	2412	429781	211116	218665	117892	180976	38190	90641	282.712	114.669	159081	454	32222	13095.9	5056.2	46.352
NorthernBobwhite_SimpleContig_ 1016	3875	6438	3291	3147	2372	2846	491	692	435.978	566.704	1699	4	210	128.385	26.564	36
NorthernBobwhite_SimpleContig_ 1017	17111	28277	14171	14106	11824	13694	602	2027	688.496	1044.64	7967	4	201	129.621	23.818	36.07
NorthernBobwhite_SimpleContig_ 1018	8186	22976	11707	11269	8126	12128	763	1840	601.157	886.72	5172	1	301	188.181	49.956	61.007
NorthernBobwhite_SimpleContig_ 1019	9347	18311	9115	9196	7326	8818	676	1400	746.381	1164.18	3167	5	249	149.402	32.488	39.917
NorthernBobwhite_SimpleContig_ 1020	4755	10459	5142	5317	3590	5306	529	967	391.86	484.67	3274	2	234	157.074	40.205	52.513
NorthernBobwhite_SimpleContig_ 1021	326	259	135	124	22	46	144	47	252.545	21.262	52	4	85	54.712	19.18	38.957
NorthernBobwhite_SimpleContig_ 1022	19031	37294	18682	18612	15300	17940	854	3002	818.958	1227.14	9616	0	242	146.87	28.631	42.299
NorthernBobwhite_SimpleContig_ 1023	7779	16077	8070	8007	6120	7788	704	1390	642.176	977.118	4216	7	245	149.388	30.217	46.754
NorthernBobwhite_SimpleContig_ 1024	3311	4919	2478	2441	1796	2204	474	426	350.644	399.632	1659	2	207	118.867	26.914	35.639
NorthernBobwhite_SimpleContig_ 1025	2943	5848	2885	2963	1982	2754	540	544	377.014	445.881	1324	1	246	147.804	38.741	42.406
NorthernBobwhite_SimpleContig_ 1026	751	285004	140927	144077	62468	107916	9642	103461	275.654	33.65	127200	0	39525	26866.1	10407.2	49.268
NorthernBobwhite_SimpleContig_ 1027	4373	8598	4246	4352	2980	3958	699	924	460.422	608.272	2520	3	242	147.761	29.517	40.521
NorthernBobwhite_SimpleContig_ 1028	5252	2581	1256	1325	844	1334	110	278	496.882	644.898	361	0	65	32.516	10.895	56.455
NorthernBobwhite_SimpleContig_ 1029	14435	6833	3448	3385	2638	3444	133	579	724.742	1138.65	951	0	62	31.11	8.926	58.351
NorthernBobwhite_SimpleContig_ 1030	9619	5274	2637	2637	1916	2764	134	433	611.334	878.201	706	1	71	35.911	9.531	58.177
NorthernBobwhite_SimpleContig_ 1031	8601	3778	1884	1894	1464	1842	134	312	683.75	1114.91	542	1	64	29.598	8.564	54.156
NorthernBobwhite_SimpleContig_ 1032	8149	14414	7236	7178	5582	6948	542	1273	589.312	887.651	4407	4	216	134.492	27.445	40.373
NorthernBobwhite_SimpleContig_ 1033	11284	19098	9541	9557	7720	8824	577	1881	672.864	1069.06	5624	0	213	132.296	27.019	37.141
NorthernBobwhite_SimpleContig_ 1034	3168	5101	2643	2458	1728	2236	420	695	360.144	423.755	1668	6	195	126.705	28.924	37.279
NorthernBobwhite_SimpleContig_ 1035	2921	4842	2483	2359	1698	2184	367	569	299.263	223.807	1351	5	190	131.216	26.706	37.145
NorthernBobwhite_SimpleContig_ 1036	31035	27234	13573	13661	11964	12546	732	1875	777.406	1196.47	4904	0	218	67.956	16.264	37.087
NorthernBobwhite_SimpleContig_ 1037	14828	27256	13668	13588	11374	12784	921	2041	763.692	1169.64	7367	12	214	141.211	22.575	39.803
NorthernBobwhite_SimpleContig_ 1038	4678	2231	1095	1136	772	1074	201	171	490.557	637.42	332	0	64	33.32	10.728	48.418
NorthernBobwhite_SimpleContig_ 1039	377	18757	9525	9232	1962	5308	2176	9199	267.26	28.231	5876	235	4425	3301.07	1020.08	61.804
NorthernBobwhite_SimpleContig_ 1040	14331	27480	13855	13625	11076	13244	581	2442	733.6	1132.97	7713	6	260	146.759	30.778	41.393
NorthernBobwhite_SimpleContig_ 1041	4665	12122	6023	6099	4166	5946	738	1201	452.416	590.624	3212	11	278	184.536	32.235	51.876
NorthernBobwhite_SimpleContig_ 1042	2556	6193	3057	3136	1814	2982	534	835	324.805	315.282	1605	11	264	172.227	32.061	50.117
NorthernBobwhite_SimpleContig_ 1043	9983	16608	8298	8310	6920	7670	617	1330	717.025	1136.82	4087	8	203	130.125	22.911	36.562
NorthernBobwhite_SimpleContig_ 1044	3064	6714	3294	3420	1992	3240	604	850	367.223	433.722	2293	8	229	155.347	29.21	52.415
NorthernBobwhite_SimpleContig_ 1045	4507	10011	4992	5019	3510	4768	698	984	397.385	495.921	2837	10	258	165.689	31.317	44.708
NorthernBobwhite_SimpleContig_ 1046	24793	46510	23256	23254	20196	21858	619	3601	832.151	1228.49	12367	5	229	143.055	26.387	39.838
NorthernBobwhite_SimpleContig_ 1047	2649	5144	2587	2557	1514	2330	539	737	292.692	179.15	1504	9	210	145.687	30.068	42.28
NorthernBobwhite_SimpleContig_ 1048	2588	838	407	431	234	352	81	163	275.726	31.398	182	4	44	21.663	7.916	46.6
NorthernBobwhite_SimpleContig_ 1049	7270	3446	1683	1763	1262	1726	133	309	581.918	901.589	536	1	61	32.68	9.286	52.201
NorthernBobwhite_SimpleContig_ 1050	5408	15504	7706	7798	5040	7880	842	1678	496.464	687.958	4280	5	305	189.725	47.55	60.854
NorthernBobwhite_SimpleContig_ 1051	349	230	95	135	26	78	70	55	263	29.06	46	1	78	48.96	19.7	35.244
NorthernBobwhite_SimpleContig_ 1052	1283	3079	1516	1563	898	1344	324	495	275.755	33.656	1086	8	255	175.511	42.496	49.026
NorthernBobwhite_SimpleContig_ 1053	9446	14541	7287	7254	5890	6596	391	1587	710.929	1129.2	3789	0	219	120.26	23.432	33.845
NorthernBobwhite_SimpleContig_ 1054	1681	3281	1672	1609	984	1324	262	697	276.882	35.646	1152	1	241	143.607	42.999	43.427
NorthernBobwhite_SimpleContig_ 1055	374	816	415	401	60	234	99	422	271.467	32.497	132	6	222	149.302	57.188	50.802
NorthernBobwhite_SimpleContig_ 1056	32148	61969	30885	31084	26342	30088	966	4299	805.251	1205.34	10933	0	244	146.806	26.731	40.379
NorthernBobwhite_SimpleContig_ 1057	4261	7775	3862	3913	2728	3502	723	785	472.183	618.488	2693	10	207	138.433	26.297	42.126
NorthernBobwhite_SimpleContig_ 1058	26253	65616	32836	32780	25736	33324	1349	4885	849.467	1246.19	11729	0	541	178.807	33.413	48.28
NorthernBobwhite_SimpleContig_ 1059	350	12787	5780	7007	800	2138	3878	5880	267.895	28.552	6712	124	5662	2491.53	1370.33	58.286
NorthernBobwhite_SimpleContig_ 1060	5370	10511	5254	5257	3944	4844	615	1063	572.375	802.437	3169	3	220	146.204	29.879	42.048
NorthernBobwhite_SimpleContig_ 1061	10016	18906	9475	9431	7654	8914	595	1657	695.731	1017.71	5498	6	228	142.777	26.164	40.785
NorthernBobwhite_SimpleContig_ 1062	6667	13739	6849	6890	4856	6532	975	1318	536.563	784.368	3612	3	247	150.035	34.7	45.013
NorthernBobwhite_SimpleContig_ 1063	4005	7485	3801	3684	2546	3548	540	816	460.229	616.001	2273	17	209	142.125	28.11	41.698
NorthernBobwhite_SimpleContig_ 1064	4605	9114	4545	4569	3214	4230	636	988	435.917	566.295	2864	11	240	146.359	33.226	45.798
NorthernBobwhite_SimpleContig_ 1065	16527	31489	15664	15825	13174	14730	671	2727	774.332	1167.13	9858	6	228	144.397	27.098	42.3
NorthernBobwhite_SimpleContig_ 1066	5080	8013	3952	4061	3204	3592	515	659	471.426	626.691	2070	3	195	124.652	26.856	35.61
NorthernBobwhite_SimpleContig_ 1067	7541	11591	5757	5834	4636	5016	613	1280	614.321	959.39	3583	8	197	120.745	24.665	32.953
NorthernBobwhite_SimpleContig_ 1068	4824	8917	4521	4396	3296	4174	571	822	435.499	567.441	2445	8	210	140.86	28.793	39.739
NorthernBobwhite_SimpleContig_ 1069	789	31487	15773	15714	6774	13190	2135	9194	276.226	34.184	13234	140	3506	2678.08	680.246	59.949
NorthernBobwhite_SimpleContig_ 1070	321	12410	5906	6504	788	3614	1910	6043	259.678	22.331	6808	212	3543	2626.15	982.73	58.255
NorthernBobwhite_SimpleContig_ 1071	14899	32931	16418	16513	13372	16062	713	2635	761.687	1132.31	8265	1	254	161.502	36.174	45.446
NorthernBobwhite_SimpleContig_ 1072	25287	63645	31983	31662	25028	32244	772	5253	713.273	1092.32	19082	10	296	178.2	31.101	53.648
NorthernBobwhite_SimpleContig_ 1073	8422	19513	9796	9717	7202	9704	858	1643	633.749	982.797	4546	9	263	163.94	30.308	52.778
NorthernBobwhite_SimpleContig_ 1074	10520	15827	7971	7856	6348	7228	704	1448	618.442	944.019	4881	0	205	117.728	28.329	34.81
NorthernBobwhite_SimpleContig_ 1075	347	91	50	41	8	22	11	49	261.5	29.133	11	1	35	18.259	8.094	54.755
NorthernBobwhite_SimpleContig_ 1076	3048	6699	3319	3380	2202	3224	626	616	333.263	346.423	1634	6	227	161.636	32.004	47.539
NorthernBobwhite_SimpleContig_ 1077	6111	14919	7433	7486	5192	7606	756	1292	558.514	831.805	3887	7	246	173.425	33.533	49.828
NorthernBobwhite_SimpleContig_ 1078	582	981	482	499	206	338	137	293	276.699	36.509	309	4	181	124.579	40.935	46.564
NorthernBobwhite_SimpleContig_ 1079	959	1453	719	734	406	552	237	255	278.532	33.927	417	4	197	115.505	42.825	44.526
NorthernBobwhite_SimpleContig_ 1080	674	1622	696	926	224	504	125	756	269.277	32.808	866	7	316	154.519	69.972	61.424
NorthernBobwhite_SimpleContig_ 1081	11501	23473	11769	11704	9476	11126	570	2180	793.263	1175.4	6792	3	231	154.209	29.065	42.162
NorthernBobwhite_SimpleContig_ 1082	4058	8141	4056	4085	2798	3782	579	940	449.203	583.757	2625	9	226	151.794	29.004	40.808
NorthernBobwhite_SimpleContig_ 1083	900	1917	952	965	468	870	224	348	274.406	32.638	565	2	208	156.592	40.841	45
NorthernBobwhite_SimpleContig_ 1084	28492	44311	22218	22093	19286	20734	772	3299	719.773	1130.48	10284	0	237	123.61	24.974	34.336
NorthernBobwhite_SimpleContig_ 1085	721	648	330	318	154	246	171	75	276.117	35.164	116	3	93	66.222	18.339	43.828
NorthernBobwhite_SimpleContig_ 1086	733	745	387	358	190	276	152	127	277.589	36.03	146	1	115	76.49	22.646	43.111
NorthernBobwhite_SimpleContig_ 1087	8419	15978	7973	8005	6158	7648	805	1294	603.396	925.847	4704	6	217	145.167	28.196	39.256
NorthernBobwhite_SimpleContig_ 1088	6860	17311	8630	8681	6080	8718	765	1651	588.966	897.143	5044	9	279	177.193	31.536	53.703
NorthernBobwhite_SimpleContig_ 1089	563	1226	648	578	226	508	186	301	275.053	30.752	387	6	210	151.975	43.697	52.575
NorthernBobwhite_SimpleContig_ 1090	5257	11085	5541	5544	4004	5126	891	1003	457.079	608.899	2776	9	232	156.253	25.864	44.436
NorthernBobwhite_SimpleContig_ 1091	4962	9071	4585	4486	3310	4082	781	849	497.826	675.312	2454	5	221	136.784	29.253	42.705
NorthernBobwhite_SimpleContig_ 1092	13646	33341	16700	16641	12984	16582	871	2718	751.321	1112.5	7365	15	276	173.987	30.037	50.872
NorthernBobwhite_SimpleContig_ 1093	7901	15795	7933	7862	5800	7704	722	1489	584.626	912.702	4117	11	230	144.969	35.275	46.526
NorthernBobwhite_SimpleContig_ 1094	50450	24237	12128	12109	10162	11886	238	1800	781.181	1173.65	3552	2	70	32.935	8.651	54.48
NorthernBobwhite_SimpleContig_ 1095	6394	10831	5322	5509	4162	5124	376	1119	560.237	838.38	3155	8	204	131.011	25.626	36.722
NorthernBobwhite_SimpleContig_ 1096	2238	3617	1793	1824	1242	1582	366	407	275.538	34.14	1205	7	182	126.308	28.809	37.31
NorthernBobwhite_SimpleContig_ 1097	7657	21457	10808	10649	7590	11272	805	1669	621.773	952.872	4966	10	315	192.56	38.133	57.085
NorthernBobwhite_SimpleContig_ 1098	32555	30230	15115	15115	12964	14344	768	2022	857.193	1270.72	5341	0	147	70.628	16.368	39.945
NorthernBobwhite_SimpleContig_ 1099	629	473	237	236	94	134	157	86	267.383	29.281	93	1	91	56.626	15.859	34.022
NorthernBobwhite_SimpleContig_ 1100	4340	10437	5226	5211	3768	4908	691	1012	462.292	607.717	3355	11	295	174.104	32.387	49.263
NorthernBobwhite_SimpleContig_ 1101	7091	15781	7867	7914	6014	7660	748	1271	523.178	742.744	3265	3	299	165.705	35.7	44.874
NorthernBobwhite_SimpleContig_ 1102	5801	8941	4507	4434	3330	3904	469	1198	586.644	835.001	3162	6	195	119.386	29.927	35.89
NorthernBobwhite_SimpleContig_ 1103	10521	18301	9188	9113	7800	8450	529	1440	692.988	1106.28	4256	1	203	135.391	25.313	36.223
NorthernBobwhite_SimpleContig_ 1104	2661	6443	3265	3178	1942	3146	569	755	322.932	304.553	1876	12	250	163.446	43.632	60.053
NorthernBobwhite_SimpleContig_ 1105	2559	6267	3156	3111	1876	3028	495	842	282.94	117.665	1241	6	256	170.989	45.36	55.647
NorthernBobwhite_SimpleContig_ 1106	3137	7175	3594	3581	2264	3196	506	1174	384.173	464.178	2029	14	274	158.641	35.864	54.415
NorthernBobwhite_SimpleContig_ 1107	3652	7011	3555	3456	2154	3270	530	1018	470.406	620.764	1491	4	243	132.69	38.95	53.286
NorthernBobwhite_SimpleContig_ 1108	1234	1467	739	728	450	562	248	196	276.733	35.372	387	7	160	94.592	25.535	31.929
NorthernBobwhite_SimpleContig_ 1109	966	1172	594	578	318	432	123	293	279.365	33.983	395	1	135	95.452	26.622	30.228
NorthernBobwhite_SimpleContig_ 1110	5270	11270	5491	5779	4224	5302	608	1085	550.84	743.033	2974	5	238	156.171	29.15	46.812
NorthernBobwhite_SimpleContig_ 1111	8358	13796	6892	6904	5554	6420	466	1299	649.235	1003.07	4555	6	201	128.444	22.25	34.996
NorthernBobwhite_SimpleContig_ 1112	3434	5815	2900	2915	1840	2480	592	867	405.567	515.007	1401	0	216	128.078	31.933	39.08
NorthernBobwhite_SimpleContig_ 1113	1836	3512	1705	1807	1010	1612	364	508	275.754	34.089	1044	5	219	143.077	36.084	41.394
NorthernBobwhite_SimpleContig_ 1114	16054	27343	13647	13696	11860	12814	387	2149	733.065	1139.75	5489	0	252	134.44	27.915	36.402
NorthernBobwhite_SimpleContig_ 1115	3689	7725	3861	3864	2570	3640	840	639	376.763	459.113	2017	14	231	153.238	31.878	46.056
NorthernBobwhite_SimpleContig_ 1116	763	1449	710	739	380	518	291	254	275.326	37.083	364	3	212	143.615	39.414	44.954
NorthernBobwhite_SimpleContig_ 1117	1638	3787	1973	1814	1202	1678	359	529	277.087	33.65	1254	8	246	170.275	37.951	52.381
NorthernBobwhite_SimpleContig_ 1118	6301	13331	6720	6611	4996	6468	657	1137	576.346	829.732	3963	1	247	156.387	34.708	45.167
NorthernBobwhite_SimpleContig_ 1119	11412	24988	12567	12421	10070	11988	782	2037	805.595	1225.43	7158	8	257	162.134	29.869	44.532
NorthernBobwhite_SimpleContig_ 1120	6020	13915	7046	6869	5150	6582	878	1224	594.532	934.879	4269	3	240	164.561	28.712	52.741
NorthernBobwhite_SimpleContig_ 1121	7011	11742	5853	5889	4804	5448	477	959	557.387	861.951	3476	4	204	131.78	23.99	37.698
NorthernBobwhite_SimpleContig_ 1122	2705	5951	3049	2902	1798	2638	507	970	317.811	289.558	1942	2	243	159.756	35.731	50.98
NorthernBobwhite_SimpleContig_ 1123	62923	28122	14094	14028	12056	13628	339	1938	734.201	1077.82	4293	1	83	31.525	8.519	51.776
NorthernBobwhite_SimpleContig_ 1124	1278	3149	1602	1547	930	1442	347	414	276.058	35.841	1086	10	237	168.009	47.847	56.808
NorthernBobwhite_SimpleContig_ 1125	5410	8432	4233	4199	3096	3806	572	907	467.209	645.744	3029	10	196	122.748	24.768	37.098
NorthernBobwhite_SimpleContig_ 1126	3274	7045	3555	3490	2506	3324	365	815	360.559	422.895	1995	10	241	160.916	32.68	46.976
NorthernBobwhite_SimpleContig_ 1127	6732	13676	6803	6873	5240	6478	623	1276	547.242	853.022	4814	1	239	153.084	40.117	44.86
NorthernBobwhite_SimpleContig_ 1128	6456	12786	6449	6337	4928	6152	653	1002	598.351	878.824	3510	6	240	148.885	29.883	42.627
NorthernBobwhite_SimpleContig_ 1129	20769	8879	4449	4430	3798	4056	165	802	830.575	1170.28	1513	1	132	29.764	9.76	50.431
NorthernBobwhite_SimpleContig_ 1130	939	1837	929	908	476	780	223	352	275.395	33.841	385	2	217	142.902	36.178	47.391
NorthernBobwhite_SimpleContig_ 1131	2562	5792	2903	2889	1776	2656	566	768	289.203	154.882	2124	2	269	165.34	39.687	45.941
NorthernBobwhite_SimpleContig_ 1132	1612	7223	3516	3707	1968	3182	871	1160	277.717	34.701	2625	19	437	320.012	64.715	48.077
NorthernBobwhite_SimpleContig_ 1133	1442	7287	3640	3647	1776	3264	709	1492	279.649	36.13	2602	19	495	350.571	88.975	55.409
NorthernBobwhite_SimpleContig_ 1134	17537	40492	20263	20229	15752	20490	616	3397	727.618	1113.1	11204	3	261	168.835	31.076	47.311
NorthernBobwhite_SimpleContig_ 1135	7780	18472	9291	9181	6684	9070	934	1676	596.38	906.522	4870	5	271	168.211	37.95	50.848
NorthernBobwhite_SimpleContig_ 1136	3986	8521	4213	4308	3036	3822	773	856	451.984	598.684	1703	4	237	159.763	31.321	43.527
NorthernBobwhite_SimpleContig_ 1137	35708	67037	33538	33499	29374	31282	1086	4993	847.162	1285.11	13712	0	248	143.81	23.671	39.703
NorthernBobwhite_SimpleContig_ 1138	14431	29589	14781	14808	12100	14164	699	2490	761.821	1155.4	8462	7	266	152.963	26.545	42.963
NorthernBobwhite_SimpleContig_ 1139	2212	3675	1806	1869	1206	1566	424	464	277.358	33.377	1053	6	219	130.082	27.867	36.709
NorthernBobwhite_SimpleContig_ 1140	444	298	133	165	44	106	108	40	267.182	25.601	58	4	94	51.671	20.442	36.036
NorthernBobwhite_SimpleContig_ 1141	91571	42456	21284	21172	18146	20864	244	2960	767.463	1160.06	6686	1	85	32.55	8.747	52.265
NorthernBobwhite_SimpleContig_ 1142	2663	6063	3022	3041	1820	2902	577	731	301.298	219.124	1933	2	238	154.614	46.251	57.679
NorthernBobwhite_SimpleContig_ 1143	21751	40628	20378	20250	17360	19446	538	3095	815.475	1224.08	10505	1	227	143.038	26.045	39.428
NorthernBobwhite_SimpleContig_ 1144	12433	24144	12067	12077	10092	11552	603	1768	761.512	1161.78	7472	7	283	147.66	26.09	41.189
NorthernBobwhite_SimpleContig_ 1145	11034	19222	9658	9564	7860	8986	531	1751	657.948	984.709	5950	5	207	135.452	26.649	38.218
NorthernBobwhite_SimpleContig_ 1146	4300	9013	4364	4649	2946	4410	563	1044	421.538	546.416	2502	1	354	151.892	37.548	45.767
NorthernBobwhite_SimpleContig_ 1147	636	4288	2146	2142	790	1496	211	1773	277.61	35.857	2110	30	737	517.929	163.339	42.61
NorthernBobwhite_SimpleContig_ 1148	3350	5932	2975	2957	1924	2646	589	734	422.491	535.238	2320	0	193	136.152	30.364	38.836
NorthernBobwhite_SimpleContig_ 1149	19858	16915	8454	8461	7322	7988	366	1161	799.488	1194.52	3012	0	145	65.51	14.958	36.952
NorthernBobwhite_SimpleContig_ 1150	15490	14080	7041	7039	5676	6714	411	1209	773.856	1193.07	2537	0	158	69.078	16.101	37.624
NorthernBobwhite_SimpleContig_ 1151	1889	2872	1465	1407	906	1274	384	297	278.53	34.42	757	4	185	116.962	28.7	39.174
NorthernBobwhite_SimpleContig_ 1152	9408	19762	9897	9865	7726	9446	659	1829	650.972	1011.7	5865	9	233	153.973	30.443	46.259
NorthernBobwhite_SimpleContig_ 1153	9254	16674	8349	8325	6842	7796	601	1356	626.922	897.462	4888	3	210	138.463	23.31	39.669
NorthernBobwhite_SimpleContig_ 1154	1892	2777	1393	1384	902	1150	254	453	278.506	34.928	833	4	178	113.179	22.263	34.619
NorthernBobwhite_SimpleContig_ 1155	2247	3569	1776	1793	1166	1526	415	443	276.849	35.309	1138	7	193	124.062	31.049	37.205
NorthernBobwhite_SimpleContig_ 1156	9649	20222	10173	10049	7712	9732	674	2006	716.809	1062.84	6335	5	237	156.387	30.822	42.595
NorthernBobwhite_SimpleContig_ 1157	1296	2759	1361	1398	802	1192	445	308	276.781	31.468	1145	8	230	156.384	38.996	44.985
NorthernBobwhite_SimpleContig_ 1158	9921	20283	10225	10058	8316	9476	642	1748	710.714	1044.89	6449	4	219	154.194	22.736	43.151
NorthernBobwhite_SimpleContig_ 1159	2020	4680	2354	2326	1356	2234	440	631	275.581	34.215	1291	9	227	165.039	32.273	46.386
NorthernBobwhite_SimpleContig_ 1160	948	1807	937	870	500	758	306	236	275.892	34.82	786	8	207	144.429	34.965	41.667
NorthernBobwhite_SimpleContig_ 1161	2414	4612	2306	2306	1538	2098	408	543	275.492	33.189	1328	5	205	146.304	29.98	41.218
NorthernBobwhite_SimpleContig_ 1162	2327	5313	2647	2666	1680	2430	510	670	287.657	137.956	1661	8	250	171.119	34.326	45.681
NorthernBobwhite_SimpleContig_ 1163	1741	3363	1689	1674	958	1534	406	449	277.144	33.94	884	3	212	144.672	31.549	42.447
NorthernBobwhite_SimpleContig_ 1164	8347	16101	8044	8057	6430	7568	579	1451	729.35	1074.67	3741	9	220	145.494	24.066	40.326
NorthernBobwhite_SimpleContig_ 1165	1374	2689	1372	1317	732	1116	421	404	276.669	33.877	408	10	197	138.934	25.559	43.523
NorthernBobwhite_SimpleContig_ 1166	51160	60269	29874	30395	23650	26820	3349	6177	850.079	1265.63	13105	2	4883	85.782	143.449	44.118
NorthernBobwhite_SimpleContig_ 1167	2590	389130	194644	194486	112568	184038	37107	53568	307.073	247.332	130485	683	13503	10912.1	1754.94	46.448
NorthernBobwhite_SimpleContig_ 1168	516	913	462	451	140	318	146	301	273.714	31.729	148	10	165	121.467	31.696	51.744
NorthernBobwhite_SimpleContig_ 1169	2027	4395	2102	2293	1200	2170	263	734	276.613	32.72	1440	1	224	137.09	45.756	67.637
NorthernBobwhite_SimpleContig_ 1170	3121	6793	3421	3372	2186	3084	580	905	428.382	556.469	2005	0	254	159.189	42.899	46.427
NorthernBobwhite_SimpleContig_ 1171	7531	16882	8424	8458	6066	8314	623	1811	681.187	1016.59	5743	11	246	161.139	28.253	48.32
NorthernBobwhite_SimpleContig_ 1172	7980	14761	7320	7441	5820	6874	652	1355	608.416	894.391	4456	12	226	141.79	26.896	39.386
NorthernBobwhite_SimpleContig_ 1173	604	229954	120247	109707	45342	87864	347	95202	273.495	32.865	96750	1430	34713	26520.6	7062.72	51.325
NorthernBobwhite_SimpleContig_ 1174	8309	13925	6940	6985	5630	6436	622	1179	598.34	965.323	3257	8	200	131.085	23.723	36.442
NorthernBobwhite_SimpleContig_ 1175	36967	16295	8122	8173	7160	7678	241	1136	852.24	1235.67	2632	1	75	31.067	8.499	49.547
NorthernBobwhite_SimpleContig_ 1176	12186	22875	11458	11417	9276	10766	648	2061	709.823	1049.1	5922	13	217	142.935	24.406	40.678
NorthernBobwhite_SimpleContig_ 1177	8845	22284	11037	11247	8282	11210	860	1827	637.851	992.186	5977	6	286	177.757	33.597	54.042
NorthernBobwhite_SimpleContig_ 1178	8921	14137	7028	7109	5948	6526	494	1102	651.49	986.825	4396	8	191	125.8	22.466	34.402
NorthernBobwhite_SimpleContig_ 1179	3658	7949	4002	3947	2694	3728	442	1049	440.506	564.696	1997	14	231	157.961	33.32	46.173
NorthernBobwhite_SimpleContig_ 1180	13373	31282	15615	15667	11966	15746	942	2470	741.685	1117.98	8559	3	281	170.353	28.742	47.185
NorthernBobwhite_SimpleContig_ 1181	444	257392	126830	130562	22374	57288	12348	163993	265.526	30.389	114951	0	77097	43051.4	25412.9	40.09
NorthernBobwhite_SimpleContig_ 1182	355	35172	17625	17547	44	1694	240	32989	269.955	34.821	19069	0	24821	5035.98	7241.28	40.282
NorthernBobwhite_SimpleContig_ 1183	3783	8968	4437	4531	3134	4196	650	938	420.08	544.374	2394	6	263	170.124	30.751	51.097
NorthernBobwhite_SimpleContig_ 1184	17000	36388	18200	18188	14608	17966	923	2703	756.798	1130.54	10777	9	260	158.13	28.078	45.806
NorthernBobwhite_SimpleContig_ 1185	5860	12816	6496	6320	4418	6416	645	1268	484.57	688.408	2901	6	244	147.816	39.691	60.034
NorthernBobwhite_SimpleContig_ 1186	396	690	314	376	70	212	174	233	260	25.969	113	4	206	126.568	48.109	43.434
NorthernBobwhite_SimpleContig_ 1187	2835	6137	2993	3144	1902	2930	640	643	309.163	270.275	1590	6	245	160.754	38.758	43.316
NorthernBobwhite_SimpleContig_ 1188	1150	1758	895	863	596	676	133	347	278.574	32.774	576	6	174	122.597	28.334	34.087
NorthernBobwhite_SimpleContig_ 1189	4285	1831	931	900	664	908	108	142	422.22	563.021	237	2	52	28.663	8.199	59.253
NorthernBobwhite_SimpleContig_ 1190	1190	64215	32489	31726	16692	27206	4678	15328	275.434	33.869	31344	210	5569	3923.43	973.201	45.966
NorthernBobwhite_SimpleContig_ 1191	4087	6443	3228	3215	2570	2866	300	665	408.342	522.284	1554	5	175	126.284	20.41	36.457
NorthernBobwhite_SimpleContig_ 1192	4925	8988	4441	4547	2984	4148	735	1070	532.424	710.345	2960	5	221	135.705	31.95	40.69
NorthernBobwhite_SimpleContig_ 1193	6050	13039	6539	6500	4984	5874	621	1487	503.378	750.514	3663	8	269	168.23	42.695	37.008
NorthernBobwhite_SimpleContig_ 1194	22837	45615	22784	22831	19240	21918	750	3498	805.251	1197.64	13424	5	254	151.666	29.029	41.096
NorthernBobwhite_SimpleContig_ 1195	8303	21629	10875	10754	8082	10682	780	1973	685.42	1008.19	5894	7	272	180.047	35.958	56.088
NorthernBobwhite_SimpleContig_ 1196	1379	2754	1389	1365	818	1180	314	432	279.374	36.245	928	10	216	151.243	33.137	41.842
NorthernBobwhite_SimpleContig_ 1197	11935	22891	11438	11453	9656	10458	676	1990	748.41	1149.4	7250	9	221	144.819	26.812	42.103
NorthernBobwhite_SimpleContig_ 1198	23472	34643	17289	17354	15670	16038	498	2286	653.716	1006.96	8167	4	190	119.21	20.453	33.359
NorthernBobwhite_SimpleContig_ 1199	10398	26627	13366	13261	10154	13420	873	2031	730.294	1113.4	6808	12	267	184.712	28.122	48.577
NorthernBobwhite_SimpleContig_ 1200	10453	498230	249066	249164	189844	258406	5470	41988	668.906	991.756	86233	143	7696	3404.92	619.661	45.164
NorthernBobwhite_SimpleContig_ 1201	97994	42957	21412	21545	18510	21028	166	3013	786.207	1139.88	6869	1	71	30.6	7.824	51.963
NorthernBobwhite_SimpleContig_ 1202	9714	17035	8486	8549	6970	7960	512	1513	666.429	1017.23	3637	10	210	133.8	27.529	38.933
NorthernBobwhite_SimpleContig_ 1203	8587	22155	11110	11045	8200	11066	714	2046	688.822	1002.83	5909	7	267	185.563	29.606	50.169
NorthernBobwhite_SimpleContig_ 1204	1847	3657	1748	1909	924	1806	316	595	279.604	34.807	877	5	287	125.746	65.483	64.483
NorthernBobwhite_SimpleContig_ 1205	2459	4522	2303	2219	1478	2190	297	531	285.709	127.585	1357	1	230	120.694	43.543	66.368
NorthernBobwhite_SimpleContig_ 1206	18796	33639	16875	16764	14202	16112	793	2378	780.985	1204.06	8631	1	209	137.71	23.263	38.881
NorthernBobwhite_SimpleContig_ 1207	6726	10757	5322	5435	3824	4866	939	1076	376.272	457.578	2971	3	186	125.749	27.548	34.761
NorthernBobwhite_SimpleContig_ 1208	2842	5646	2831	2815	1798	2384	638	788	368.505	438.894	1620	0	225	148.697	36.952	43.878
NorthernBobwhite_SimpleContig_ 1209	2351	5213	2555	2658	1568	2438	524	648	278.143	34.641	1387	10	254	164.892	34.293	46.108
NorthernBobwhite_SimpleContig_ 1210	11053	20845	10471	10374	7996	9500	1385	1860	690.831	1032.32	6828	0	500	141.777	36.964	41.862
NorthernBobwhite_SimpleContig_ 1211	17141	31721	15819	15902	12904	15226	733	2692	743.684	1137.31	9372	0	241	139.632	27.196	41.013
NorthernBobwhite_SimpleContig_ 1212	2624	5125	2527	2598	1694	2292	547	572	318.586	290.393	1428	7	222	145.705	25.957	44.055
NorthernBobwhite_SimpleContig_ 1213	25671	48407	24147	24260	20292	23614	681	3576	739.526	1138.36	11565	5	242	143.164	30.219	41.673
NorthernBobwhite_SimpleContig_ 1214	377	695	348	347	78	200	133	280	268.641	29.275	245	7	199	132.629	48.315	42.971
NorthernBobwhite_SimpleContig_ 1215	4406	8355	4151	4204	2974	3758	663	920	484.302	639.953	2627	9	207	145.774	23.084	40.127
NorthernBobwhite_SimpleContig_ 1216	458	1011	491	520	160	322	108	421	278.35	32.399	171	10	235	160.893	55.936	43.013
NorthernBobwhite_SimpleContig_ 1217	8816	15164	7612	7552	6290	7064	487	1245	643.509	1014.55	3968	4	206	133.315	26.367	37.647
NorthernBobwhite_SimpleContig_ 1218	2653	4132	2042	2090	1308	1680	424	705	298.667	220.507	1730	8	192	122.199	29.297	35.62
NorthernBobwhite_SimpleContig_ 1219	2513	4691	2410	2281	1546	2010	573	544	285.86	149.637	1542	3	211	142.043	29.834	41.743
NorthernBobwhite_SimpleContig_ 1220	2494	4961	2496	2465	1594	2244	579	522	289.807	161.739	1731	8	268	145.746	36.814	44.547
NorthernBobwhite_SimpleContig_ 1221	8862	13651	6803	6848	5710	6154	398	1321	660.172	1054.01	4141	1	192	121.839	24.158	33.898
NorthernBobwhite_SimpleContig_ 1222	767	1091	579	512	298	396	203	185	274.53	31.074	328	3	159	115.233	35.345	35.332
NorthernBobwhite_SimpleContig_ 1223	4247	7404	3616	3788	2826	3314	509	719	403.385	509.709	2566	8	225	136.56	28.949	37.933
NorthernBobwhite_SimpleContig_ 1224	10312	21696	10865	10831	8430	10816	564	1764	693.926	1078.54	5595	7	280	150.875	39.53	48.856
NorthernBobwhite_SimpleContig_ 1225	14413	35146	17579	17567	13350	17586	1070	2939	707.895	1099.1	9446	0	501	177.621	72.312	48.213
NorthernBobwhite_SimpleContig_ 1226	1732	3617	1807	1810	1050	1578	342	628	276.192	35.293	1302	4	257	148.542	38.343	49.365
NorthernBobwhite_SimpleContig_ 1227	3578	7540	3713	3827	2512	3602	588	793	393.143	485.334	2060	5	241	155.237	32.884	48.547
NorthernBobwhite_SimpleContig_ 1228	8452	12300	6140	6160	5066	5624	456	1088	659.722	1032.47	2931	0	193	114.289	27.032	34.56
NorthernBobwhite_SimpleContig_ 1229	1937	4097	2022	2075	1232	1810	450	589	275.557	33.481	1059	8	213	157.993	31.772	46.309
NorthernBobwhite_SimpleContig_ 1230	1981	3269	1609	1660	1068	1390	285	510	277.215	33.999	1444	5	203	128.94	29.715	35.336
NorthernBobwhite_SimpleContig_ 1231	1273	1872	925	947	532	744	199	386	278.748	35.367	608	5	165	113.355	30.163	36.292
NorthernBobwhite_SimpleContig_ 1232	39535	68129	34053	34076	30506	32012	781	4498	783.86	1188.87	12133	0	260	134.681	24.539	37.089
NorthernBobwhite_SimpleContig_ 1233	22656	9636	4821	4815	4134	4636	86	713	812.551	1166.09	1486	1	66	30.201	9.144	47.78
NorthernBobwhite_SimpleContig_ 1234	1987	3998	2022	1976	1164	1906	466	437	276.046	33.568	1235	9	239	149.895	29.854	42.929
NorthernBobwhite_SimpleContig_ 1235	1547	2490	1198	1292	772	1088	290	327	278.456	34.126	646	7	184	125.946	30.733	33.678
NorthernBobwhite_SimpleContig_ 1236	16281	25228	12600	12628	11526	11420	390	1779	752.804	1177.27	5545	3	201	122.169	22.01	34.408
NorthernBobwhite_SimpleContig_ 1237	7020	13054	6469	6585	5104	6008	567	1311	601.466	948.208	2447	0	246	141.006	37.04	38.903
NorthernBobwhite_SimpleContig_ 1238	3952	7758	3850	3908	2794	3586	673	665	420.563	544.475	1640	7	254	148.125	34.264	39.524
NorthernBobwhite_SimpleContig_ 1239	20815	44141	22037	22104	19022	20984	913	2993	796.077	1197.32	7971	10	249	160.869	27.232	42.138
NorthernBobwhite_SimpleContig_ 1240	17807	35610	17724	17886	14734	16988	538	3137	747.571	1155.7	10286	5	237	151.767	27.097	43.691
NorthernBobwhite_SimpleContig_ 1241	874	1244	632	612	356	512	42	329	273.876	36.196	226	3	164	113.505	35.495	32.952
NorthernBobwhite_SimpleContig_ 1242	918	93319	46726	46593	25364	41766	1905	23807	275.627	33.931	34851	455	9303	7351.99	1727.48	48.366
NorthernBobwhite_SimpleContig_ 1243	325	318	145	173	14	76	136	89	262	23.719	57	2	110	67.302	31.43	36
NorthernBobwhite_SimpleContig_ 1244	7535	11439	5713	5726	4526	5264	509	1079	539.323	804.939	4019	9	195	118.554	25.692	34.798
NorthernBobwhite_SimpleContig_ 1245	314	577	305	272	38	152	143	243	249.684	18.728	164	4	187	131.414	51.183	44.904
NorthernBobwhite_SimpleContig_ 1246	14186	11585	5804	5781	5152	5334	252	790	728.067	1111.78	1954	4	120	64.614	13.553	34.59
NorthernBobwhite_SimpleContig_ 1247	1175	2369	1075	1294	638	1164	338	216	273.467	34.506	738	2	209	135.207	45.7	52.936
NorthernBobwhite_SimpleContig_ 1248	16537	31252	15694	15558	13392	14652	582	2442	776.219	1137.94	7302	7	237	144.062	28.131	40.158
NorthernBobwhite_SimpleContig_ 1249	4282	45165	22614	22551	15318	21414	3655	4544	456.422	604.297	10519	40	1020	783.11	147.4	44.629
NorthernBobwhite_SimpleContig_ 1250	515	22325	10550	11775	3512	7120	1392	10187	272.64	31.875	15515	143	4470	3289.62	1153.34	37.476
NorthernBobwhite_SimpleContig_ 1251	912	41021	19277	21744	8556	14138	2831	15286	272.659	32.716	22960	119	5490	3431.37	1371.42	41.118
NorthernBobwhite_SimpleContig_ 1252	1491	2938	1484	1454	908	1270	289	459	275.559	33.237	1021	8	206	151.331	32.791	42.254
NorthernBobwhite_SimpleContig_ 1253	3997	5437	2683	2754	1760	2412	397	841	382.185	474.348	2120	6	209	107.158	39.605	32.775
NorthernBobwhite_SimpleContig_ 1254	10219	20187	10072	10115	8042	9310	816	1943	683.135	1050.85	6419	7	257	149.793	30.702	41.022
NorthernBobwhite_SimpleContig_ 1255	29355	49159	24622	24537	21184	22956	1019	3783	796.031	1196.02	11966	0	473	130.188	30.109	36.461
NorthernBobwhite_SimpleContig_ 1256	10361	521143	261171	259972	214824	245434	17561	40790	697.184	1063.97	109780	169	5565	3869.27	710.089	39.195
NorthernBobwhite_SimpleContig_ 1257	5229	9560	4706	4854	3516	4550	741	703	473.253	685.521	2431	8	215	139.036	26.905	40.677
NorthernBobwhite_SimpleContig_ 1258	1113	2832	1388	1444	774	1184	486	374	273.163	32.706	824	13	238	178.234	41.812	52.291
NorthernBobwhite_SimpleContig_ 1259	797	1339	717	622	314	512	136	367	282.299	42.317	421	2	202	112.393	56.631	61.23
NorthernBobwhite_SimpleContig_ 1260	429	637	362	275	122	248	36	230	268.016	29.279	105	5	195	111.837	50.876	37.995
NorthernBobwhite_SimpleContig_ 1261	365	435	216	219	30	110	22	271	260.667	20.287	90	10	133	89.153	30.879	30.685
NorthernBobwhite_SimpleContig_ 1262	34285	55046	27426	27620	25074	25236	621	3826	785.41	1193.41	13792	0	222	126.916	22.585	35.742
NorthernBobwhite_SimpleContig_ 1263	9590	17981	8983	8998	7032	8256	791	1816	701.001	1029.39	5740	2	253	140.569	31.141	43.024
NorthernBobwhite_SimpleContig_ 1264	1508	2536	1243	1293	716	1182	259	369	275.399	31.592	607	8	202	129.311	37.856	37.931
NorthernBobwhite_SimpleContig_ 1265	20883	38356	19065	19291	16420	18150	589	2986	767.591	1137.81	11003	8	233	142.007	24.781	38.869
NorthernBobwhite_SimpleContig_ 1266	16354	28747	14381	14366	12320	13476	530	2285	719.765	1086.72	6568	10	263	136.879	23.735	39.165
NorthernBobwhite_SimpleContig_ 1267	17823	27643	13806	13837	12062	13080	449	1910	723.867	1135.49	6022	9	195	123.399	21.886	34.523
NorthernBobwhite_SimpleContig_ 1268	1462	2964	1486	1478	812	1130	368	645	276.507	33.985	993	6	217	150.277	37.782	43.776
NorthernBobwhite_SimpleContig_ 1269	2241	4802	2461	2341	1418	2178	490	693	277.667	79.03	1081	9	222	158.578	29.311	45.426
NorthernBobwhite_SimpleContig_ 1270	12359	19162	9587	9575	8268	8920	460	1422	591.717	883.891	4725	6	197	123.652	22.667	34.477
NorthernBobwhite_SimpleContig_ 1271	13721	33608	16778	16830	12972	16514	1005	2961	743.153	1106.23	10659	6	315	176.75	30.083	49.224
NorthernBobwhite_SimpleContig_ 1272	7436	17155	8652	8503	6170	8428	895	1595	607.576	883.908	5795	7	263	169.029	28.541	46.988
NorthernBobwhite_SimpleContig_ 1273	5407	11008	5431	5577	4060	5226	619	1050	519.26	743.15	2945	8	219	153.634	23.884	42.408
NorthernBobwhite_SimpleContig_ 1274	6134	9321	4713	4608	3700	4260	426	893	463.054	643.521	2690	3	196	122.103	22.21	33.192
NorthernBobwhite_SimpleContig_ 1275	5527	8369	4223	4146	3348	3790	374	812	487.312	692.916	2877	4	181	120.148	22.107	33.345
NorthernBobwhite_SimpleContig_ 1276	15032	37260	18711	18549	13982	18842	1078	3180	712.223	1095.17	9668	2	273	177.754	31.467	49.761
NorthernBobwhite_SimpleContig_ 1277	21946	43744	21965	21779	17884	21730	776	3137	826.191	1228.8	10956	5	255	147.021	32.023	43.903
NorthernBobwhite_SimpleContig_ 1278	14286	34203	17096	17107	13474	17130	872	2570	783.546	1183.44	7847	14	272	173.866	29.015	47.739
NorthernBobwhite_SimpleContig_ 1279	5165	9292	4746	4546	3532	4326	644	732	463.095	640.296	3311	7	212	140.748	27.443	40.077
NorthernBobwhite_SimpleContig_ 1280	5395	11832	5965	5867	4296	5492	902	1092	484.072	677.613	4008	12	233	161.649	31.94	45.524
NorthernBobwhite_SimpleContig_ 1281	483	1114	565	549	224	358	180	347	272.232	30.003	283	7	219	162.923	52.76	54.658
NorthernBobwhite_SimpleContig_ 1282	14085	23418	11710	11708	9814	10638	466	2379	710.531	1102.59	7926	9	241	131.104	27.413	37.359
NorthernBobwhite_SimpleContig_ 1283	26238	49302	24545	24757	21600	23026	781	3656	805.432	1195.03	11874	6	231	144.374	24.687	38.566
NorthernBobwhite_SimpleContig_ 1284	2002	4391	2183	2208	1206	1960	475	720	276.657	33.889	1558	0	228	157.586	37.032	48.851
NorthernBobwhite_SimpleContig_ 1285	3764	7989	3969	4020	2576	3826	589	962	445.769	586.884	2440	8	226	157.433	27.325	42.694
NorthernBobwhite_SimpleContig_ 1286	1652	2435	1199	1236	794	1078	299	254	276.466	34.221	496	3	185	118.163	26.212	35.109
NorthernBobwhite_SimpleContig_ 1287	10530	19989	10072	9917	7344	9528	941	2070	484.576	701.561	4695	2	265	139.587	32.714	45.28
NorthernBobwhite_SimpleContig_ 1288	4600	8395	4153	4242	3014	3694	534	1104	481.267	636.476	2925	0	216	141.101	30.313	40.174
NorthernBobwhite_SimpleContig_ 1289	6120	9984	4966	5018	3952	4494	524	970	561.348	826.206	2900	5	220	128.384	25.979	35.931
NorthernBobwhite_SimpleContig_ 1290	8738	16216	8020	8196	6544	7686	631	1284	628.142	953.529	4175	6	230	142.619	25.484	38.43
NorthernBobwhite_SimpleContig_ 1291	14194	22820	11420	11400	9260	10056	1339	2038	796.292	1204.43	5297	6	233	121.279	39.441	39.989
NorthernBobwhite_SimpleContig_ 1292	8755	20011	9977	10034	7724	9550	744	1868	677.987	1017.67	5701	4	263	165.932	32.084	48.212
NorthernBobwhite_SimpleContig_ 1293	37842	38958	19500	19458	16624	18594	622	2950	796.912	1181.85	6930	5	143	77.929	16.924	41.494
NorthernBobwhite_SimpleContig_ 1294	458	1115	554	561	170	396	323	224	272.918	32.85	221	7	240	168.09	48.79	53.275
NorthernBobwhite_SimpleContig_ 1295	7223	12572	6300	6272	5126	5860	483	1036	603.743	910.089	2984	4	189	135.876	22.547	36.605
NorthernBobwhite_SimpleContig_ 1296	4193	5861	2979	2882	1454	1888	1161	1333	492.893	656.532	1962	6	1750	95.584	163.85	39.995
NorthernBobwhite_SimpleContig_ 1297	12232	10415	5181	5234	4422	4852	312	770	597.804	907.014	1872	4	133	67.154	15.165	35.628
NorthernBobwhite_SimpleContig_ 1298	1830	4897	2466	2431	1354	2500	536	475	277.962	35.98	817	8	256	177.989	36.39	61.475
NorthernBobwhite_SimpleContig_ 1299	2846	6947	3405	3542	2064	3468	650	736	325.716	315.893	1810	9	240	163.467	32.82	55.587
NorthernBobwhite_SimpleContig_ 1300	9053	17174	8536	8638	6696	8190	594	1591	631.286	915.565	4764	6	226	143.151	29.144	41.036
NorthernBobwhite_SimpleContig_ 1301	4560	7491	3683	3808	2762	3412	569	714	421.413	540.811	2098	6	196	128.133	23.617	36.184
NorthernBobwhite_SimpleContig_ 1302	4361	7759	3813	3946	2908	3496	690	632	453.191	594.193	1787	8	200	137.756	25.736	38.982
NorthernBobwhite_SimpleContig_ 1303	3304	9860	4939	4921	2698	4574	1026	1519	344.073	378.949	3666	7	437	207.741	67.578	52.633
NorthernBobwhite_SimpleContig_ 1304	11596	9415	4716	4699	3856	4348	479	691	682.681	1058.6	1866	12	213	63.352	16.508	34.262
NorthernBobwhite_SimpleContig_ 1305	3268	5952	2963	2989	1818	2462	649	996	369.179	431.767	1798	0	263	135.436	35.326	40.789
NorthernBobwhite_SimpleContig_ 1306	7384	11938	5955	5983	4646	5392	752	1075	567.817	859.164	3497	4	407	126.635	32.731	34.358
NorthernBobwhite_SimpleContig_ 1307	4489	7546	3728	3818	2780	3542	496	689	403.288	511.623	2056	5	209	130.413	27.671	35.643
NorthernBobwhite_SimpleContig_ 1308	12473	18598	9262	9336	8274	8618	435	1181	599.381	922.095	3730	3	198	120.213	22.189	33.665
NorthernBobwhite_SimpleContig_ 1309	1124	372258	181475	190783	101232	161904	15166	92032	279.35	37.679	110045	981	29272	22138.3	5117.23	60.498
NorthernBobwhite_SimpleContig_ 1310	8287	14787	7461	7326	5918	6944	677	1178	644.788	990.181	3671	4	196	137.797	23.273	38.566
NorthernBobwhite_SimpleContig_ 1311	46193	87166	43439	43727	37244	42674	818	6015	862.229	1267.15	19582	5	272	143.045	28.164	39.922
NorthernBobwhite_SimpleContig_ 1312	9148	18437	9226	9211	7208	8782	781	1591	643.224	943.768	4548	0	241	151.754	27.817	40.752
NorthernBobwhite_SimpleContig_ 1313	10414	19424	9702	9722	7704	9288	703	1622	705.061	1040.91	4473	8	227	139.946	25.318	39.485
NorthernBobwhite_SimpleContig_ 1314	7818	13392	6738	6654	5190	6136	751	1246	615.097	987.36	3947	0	262	131.782	26.833	37.733
NorthernBobwhite_SimpleContig_ 1315	5499	16005	8100	7905	5424	8078	554	1875	494.456	725.752	4132	8	279	196.005	32.786	60.466
NorthernBobwhite_SimpleContig_ 1316	5391	10060	5122	4938	3768	4706	632	912	502.361	677.693	3307	4	221	142.426	28.337	40.364
NorthernBobwhite_SimpleContig_ 1317	21488	36305	18097	18208	14952	17122	818	3216	638.761	998.532	8072	4	246	131.65	27.778	36.825
NorthernBobwhite_SimpleContig_ 1318	11386	17460	8776	8684	7482	7760	491	1634	601.043	946.364	6204	8	200	123.101	26.702	36.422
NorthernBobwhite_SimpleContig_ 1319	1810	4592	2260	2332	1326	2066	534	641	278.403	35.6	1545	14	255	179.353	36.43	51.602
NorthernBobwhite_SimpleContig_ 1320	12175	23346	11667	11679	9496	10690	1222	1823	675.177	1070.06	4337	4	342	148.814	57.049	37.15
NorthernBobwhite_SimpleContig_ 1321	7549	13499	6768	6731	5572	6210	486	1148	596.044	937.154	3418	4	209	140.679	24.27	36.27
NorthernBobwhite_SimpleContig_ 1322	16757	37790	18930	18860	14684	18840	858	3214	741.838	1106.78	11189	8	263	164.075	33.359	47.437
NorthernBobwhite_SimpleContig_ 1323	460	109	49	60	28	46	23	12	269.5	23.567	19	1	29	16.165	5.726	45
NorthernBobwhite_SimpleContig_ 1324	8575	3569	1795	1774	1284	1728	163	374	527.893	766.675	506	0	64	27.82	10.304	52.082
NorthernBobwhite_SimpleContig_ 1325	12612	30246	15117	15129	12088	14796	763	2458	768.826	1129.5	7632	10	258	173.82	28.602	47.891
NorthernBobwhite_SimpleContig_ 1326	1018	1645	837	808	460	730	154	294	275.513	33.983	503	4	219	123.607	38.6	38.998
NorthernBobwhite_SimpleContig_ 1327	48471	22811	11360	11451	9786	10998	164	1736	812.861	1201.2	3503	3	74	33.047	9.109	51.449
NorthernBobwhite_SimpleContig_ 1328	1090	1493	735	758	456	610	117	302	274.241	32.077	661	4	145	110.735	26.175	29.725
NorthernBobwhite_SimpleContig_ 1329	3847	6993	3505	3488	2342	3112	680	818	443.115	589.029	2705	10	215	136.274	25.659	41.903
NorthernBobwhite_SimpleContig_ 1330	3715	7099	3576	3523	2614	3188	553	716	422.814	548.828	1872	3	209	144.918	28.008	41.454
NorthernBobwhite_SimpleContig_ 1331	13244	26822	13362	13460	10740	12896	1002	2049	756.986	1120.22	5406	6	287	151.663	29.068	42.918
NorthernBobwhite_SimpleContig_ 1332	9450	19054	9451	9603	7328	9192	668	1778	681.3	1004.26	5687	5	241	147.29	31.669	44.974
NorthernBobwhite_SimpleContig_ 1333	2984	6397	3186	3211	2030	3044	580	710	363.705	420.62	1825	3	210	153.92	27.356	46.28
NorthernBobwhite_SimpleContig_ 1334	8946	17707	8894	8813	6828	8382	651	1778	729.154	1089.78	5529	13	251	148.901	25.905	41.605
NorthernBobwhite_SimpleContig_ 1335	6128	11388	5816	5572	4504	5332	557	925	516.76	765.752	3795	1	247	141.684	36.03	41.041
NorthernBobwhite_SimpleContig_ 1336	3625	7905	3888	4017	2460	3436	534	1426	322.209	305.136	2444	5	228	156.551	34.858	49.434
NorthernBobwhite_SimpleContig_ 1337	319	274	123	151	18	56	133	67	255	17.537	53	3	103	61.094	24.378	47.335
NorthernBobwhite_SimpleContig_ 1338	2389	5231	2599	2632	1594	2466	555	591	284.622	129.657	1594	4	246	161.267	39.498	46.756
NorthernBobwhite_SimpleContig_ 1339	4529	9097	4446	4651	3268	4276	631	870	485.234	636.077	2692	7	251	150.058	30.715	42.261
NorthernBobwhite_SimpleContig_ 1340	6622	12534	6290	6244	4694	6054	819	882	557.185	827.871	2586	5	219	142.073	28.636	41.317
NorthernBobwhite_SimpleContig_ 1341	2634	5035	2570	2465	1742	2322	434	505	302.259	227.697	1039	2	216	128.638	33.821	53.113
NorthernBobwhite_SimpleContig_ 1342	3030	5174	2560	2614	1710	2410	467	558	328.096	330.262	2042	8	195	133.088	28.576	36.997
NorthernBobwhite_SimpleContig_ 1343	2519	4077	2071	2006	1324	1922	371	432	290.915	162.946	1297	9	180	128.1	25.211	38.031
NorthernBobwhite_SimpleContig_ 1344	7505	15457	7695	7762	5968	7158	654	1603	631.188	929.01	4857	1	244	151.404	31.056	46.129
NorthernBobwhite_SimpleContig_ 1345	4538	11094	5598	5496	4064	5068	771	1140	442.808	583.034	2980	5	234	171.901	30.643	53.57
NorthernBobwhite_SimpleContig_ 1346	5840	15144	7515	7629	5162	7728	331	1851	489.685	718.322	4155	1	356	171.294	46.93	62.997
NorthernBobwhite_SimpleContig_ 1347	7320	15586	7808	7778	6038	7326	450	1708	633.9	967.328	5164	2	236	158.741	30.386	43.88
NorthernBobwhite_SimpleContig_ 1348	4522	11144	5619	5525	3962	5588	658	879	496.574	654.926	2917	1	243	178.167	34.456	48.297
NorthernBobwhite_SimpleContig_ 1349	1598	2404	1217	1187	820	976	348	251	279.688	35.663	683	3	183	117.991	30.571	37.171
NorthernBobwhite_SimpleContig_ 1350	754	526	263	263	130	178	139	76	271.738	32.342	103	1	94	54.045	16.735	38.462
NorthernBobwhite_SimpleContig_ 1351	11736	21666	10761	10905	8776	10288	892	1608	754.639	1151.63	4103	7	220	140.376	21.82	39.605
NorthernBobwhite_SimpleContig_ 1352	5114	11065	5540	5525	3972	5294	679	1074	468.583	624.473	2842	7	254	158.368	31.867	46.324
NorthernBobwhite_SimpleContig_ 1353	2982	176346	88232	88114	54480	80560	15529	24903	354.191	399.454	45716	0	6099	4372.78	928.227	44.031
NorthernBobwhite_SimpleContig_ 1354	12002	23120	11709	11411	9502	10866	624	2031	739.144	1124.83	6317	4	232	146.686	25.071	39.135
NorthernBobwhite_SimpleContig_ 1355	2742	4680	2354	2326	1724	1872	475	584	315.991	281.931	1431	2	193	131.765	31.268	38.621
NorthernBobwhite_SimpleContig_ 1356	3176	5574	2805	2769	2102	2400	381	656	360.215	415.909	1382	1	203	138.318	27.831	39.421
NorthernBobwhite_SimpleContig_ 1357	9113	21385	10608	10777	8036	10390	851	1975	689.587	1091.87	6617	7	249	168.004	31.339	51.597
NorthernBobwhite_SimpleContig_ 1358	2037	5378	2693	2685	1420	2544	669	714	275.603	33.392	1705	10	260	185.367	34.204	53.756
NorthernBobwhite_SimpleContig_ 1359	22362	42473	21336	21137	18282	20194	776	3017	786.742	1169.28	11494	2	233	145.278	26.935	40.059
NorthernBobwhite_SimpleContig_ 1360	8148	15226	7702	7524	5972	7138	602	1443	574.195	853.005	4187	9	209	142.838	27.855	40.034
NorthernBobwhite_SimpleContig_ 1361	7929	13381	6728	6653	5562	6152	465	1144	630.755	928.581	3816	6	191	132.492	22.675	36.575
NorthernBobwhite_SimpleContig_ 1362	794	10921	5359	5562	2576	4376	1371	2555	274.13	33.391	3853	33	1370	1022.27	303.417	40.05
NorthernBobwhite_SimpleContig_ 1363	42770	38110	19017	19093	16698	18152	568	2519	792.85	1188.84	6754	0	216	68.874	16.951	37.213
NorthernBobwhite_SimpleContig_ 1364	2559	4794	2359	2435	1634	2128	399	619	291.193	148.149	1490	6	252	142.062	41.901	40.016
NorthernBobwhite_SimpleContig_ 1365	2529	3402	1772	1630	1132	1386	391	476	283.728	91.917	1222	4	161	106.586	25.209	31.514
NorthernBobwhite_SimpleContig_ 1366	5303	8408	4302	4106	3258	3830	404	883	429.845	574.232	2215	8	181	125.216	27.38	35.47
NorthernBobwhite_SimpleContig_ 1367	5932	12764	6438	6326	4544	6416	847	901	540.429	769.542	3188	5	246	158.797	34.102	43.695
NorthernBobwhite_SimpleContig_ 1368	5565	11659	5860	5799	4222	5612	768	1002	521.791	769.379	2370	8	243	155.15	29.867	42.3
NorthernBobwhite_SimpleContig_ 1369	3135	5246	2599	2647	1716	2298	449	752	344.906	375.538	1932	7	182	128.468	26.11	38.756
NorthernBobwhite_SimpleContig_ 1370	12527	22803	11404	11399	9546	10798	623	1738	710.016	1098.74	5252	1	252	140.263	29.496	38.365
NorthernBobwhite_SimpleContig_ 1371	13489	33971	17030	16941	13510	16866	731	2681	709.817	1108.23	9705	3	268	177.105	32.767	55.119
NorthernBobwhite_SimpleContig_ 1372	8299	14468	7112	7356	5774	6716	708	1204	667.565	1040.45	2411	8	241	133.833	33.717	37.161
NorthernBobwhite_SimpleContig_ 1373	10290	19907	9936	9971	7914	9806	629	1448	677.736	1063.71	4819	2	234	146.323	29.164	40.292
NorthernBobwhite_SimpleContig_ 1374	4201	4880	2379	2501	1458	2042	588	776	437.988	574.164	1280	5	402	83.074	35.651	43.156
NorthernBobwhite_SimpleContig_ 1375	16575	33727	16944	16783	13732	16656	608	2575	800.38	1177.43	8337	6	240	151.179	26.632	43.716
NorthernBobwhite_SimpleContig_ 1376	2049	3623	1873	1750	1164	1620	475	343	275.251	32.685	971	9	198	131.637	35.172	41.776
NorthernBobwhite_SimpleContig_ 1377	308	341	180	161	8	58	192	82	266.75	13.827	60	2	111	78.416	28.424	42.208
NorthernBobwhite_SimpleContig_ 1378	24122	39851	19924	19927	17630	18740	723	2553	750.254	1136.36	8066	11	214	129.212	23.023	36.796
NorthernBobwhite_SimpleContig_ 1379	5855	13701	6817	6884	4960	6572	818	1250	538.684	765.94	4108	3	239	166.615	30.534	53.612
NorthernBobwhite_SimpleContig_ 1380	9732	22957	11446	11511	8746	11294	713	2074	693.962	1055.93	6094	6	263	168.108	33.792	50.051
NorthernBobwhite_SimpleContig_ 1381	1060	138179	69339	68840	37766	59580	13461	26671	276.617	34.218	53228	483	12522	9631.69	2239.84	47.736
NorthernBobwhite_SimpleContig_ 1382	10911	18302	9095	9207	7490	8438	858	1441	737.846	1144.59	4079	8	333	130.074	26.126	36
NorthernBobwhite_SimpleContig_ 1383	8342	20992	10498	10494	7576	10600	860	1865	654.116	1036.99	6413	11	301	176.871	29.139	51.642
NorthernBobwhite_SimpleContig_ 1384	2083	3249	1653	1596	980	1286	463	509	277.896	33.846	1006	8	222	119.912	29.926	35.478
NorthernBobwhite_SimpleContig_ 1385	854	1397	708	689	380	538	146	324	276.453	33.52	424	5	179	127.372	31.7	38.642
NorthernBobwhite_SimpleContig_ 1386	29850	12411	6246	6165	5256	6046	128	919	829.146	1259.23	1995	0	70	29.244	9.083	49.189
NorthernBobwhite_SimpleContig_ 1387	5686	14527	7241	7286	5258	7358	710	1132	493.165	707.648	2578	4	271	179.36	41.291	54.238
NorthernBobwhite_SimpleContig_ 1388	17682	14961	7491	7470	6598	6768	585	942	704.126	1049.96	2641	0	212	66.048	15.258	34.928
NorthernBobwhite_SimpleContig_ 1389	7764	17757	8666	9091	5782	7248	1724	2918	663.241	954.693	5716	0	2025	163.255	149.625	43.547
NorthernBobwhite_SimpleContig_ 1390	3643	7140	3490	3650	2394	3316	666	717	403.086	513.855	1774	4	251	145.562	36.401	41.614
NorthernBobwhite_SimpleContig_ 1391	2347	5619	2832	2787	1706	2558	596	735	279.195	75.597	1495	12	254	168.439	34.578	52.024
NorthernBobwhite_SimpleContig_ 1392	2608	5366	2680	2686	1702	2342	476	807	326.542	317.587	1516	8	213	155.493	27.89	43.597
NorthernBobwhite_SimpleContig_ 1393	2402	5262	2594	2668	1564	2388	624	666	279.394	104.991	1511	4	272	154.854	49.687	48.168
NorthernBobwhite_SimpleContig_ 1394	5858	9880	4982	4898	3864	4370	615	987	523.209	808.837	2991	9	227	131.684	27.488	37.709
NorthernBobwhite_SimpleContig_ 1395	11393	18392	9148	9244	7714	8748	555	1293	642.554	1020.79	4266	9	208	127.702	22.946	35.855
NorthernBobwhite_SimpleContig_ 1396	8848	17003	8629	8374	6438	7838	929	1703	706.9	1054.03	5155	7	765	142.938	43.992	38.777
NorthernBobwhite_SimpleContig_ 1397	15705	29239	14502	14737	12494	13798	676	2135	776.465	1163.11	8209	8	228	143.054	24.441	39.573
NorthernBobwhite_SimpleContig_ 1398	2687	6036	3108	2928	1952	2768	578	717	317.401	289.987	2086	5	258	165.566	37.601	46.892
NorthernBobwhite_SimpleContig_ 1399	3952	8137	4070	4067	2982	3704	588	820	425.789	555.084	2921	4	241	156.035	29.718	41.422
NorthernBobwhite_SimpleContig_ 1400	561	1173	543	630	222	370	212	366	274.198	31.222	466	8	217	153.237	43.852	42.068
NorthernBobwhite_SimpleContig_ 1401	361	557	312	245	74	126	112	241	258.676	26.122	134	5	188	115.244	47.742	40.72
NorthernBobwhite_SimpleContig_ 1402	20411	19078	9569	9509	7740	8592	998	1646	774.948	1136.45	3937	0	309	70.065	21.248	37.916
NorthernBobwhite_SimpleContig_ 1403	1828	2761	1405	1356	974	1144	220	407	279.768	35.56	1005	8	163	119.559	24.941	34.573
NorthernBobwhite_SimpleContig_ 1404	6072	12929	6376	6553	4632	6480	663	1093	533.406	760.008	3715	9	218	156.375	26.616	44.417
NorthernBobwhite_SimpleContig_ 1405	11630	30237	15068	15169	11262	15444	890	2477	669.874	1017.9	8231	6	306	175.9	41.68	58.839
NorthernBobwhite_SimpleContig_ 1406	9263	18191	9015	9176	7296	8552	790	1448	637.556	987.357	3657	6	248	149.352	32.076	42.394
NorthernBobwhite_SimpleContig_ 1407	4638	9982	5076	4906	3328	4830	667	1105	450.126	593.936	2559	2	275	150.905	49.534	53.471
NorthernBobwhite_SimpleContig_ 1408	1105	1562	789	773	520	580	185	270	277.719	36.78	434	2	164	115.081	26.054	32.941
NorthernBobwhite_SimpleContig_ 1409	4319	6585	3265	3320	2612	2874	504	567	402.791	509.794	1782	7	165	122.473	21.404	36.212
NorthernBobwhite_SimpleContig_ 1410	7600	15054	7522	7532	5756	7170	759	1302	644.929	960.181	4394	8	235	146.543	28.838	44.395
NorthernBobwhite_SimpleContig_ 1411	5905	10781	5421	5360	4006	5042	673	1009	589.509	832.947	3190	3	212	138.879	24.144	40.423
NorthernBobwhite_SimpleContig_ 1412	2447	4743	2343	2400	1470	2196	441	614	287.374	148.432	1128	3	217	146.647	28.881	41.152
NorthernBobwhite_SimpleContig_ 1413	3772	7435	3735	3700	2592	3492	529	780	433.494	572.754	1954	7	208	148.201	24.429	41.304
NorthernBobwhite_SimpleContig_ 1414	2734	4161	2054	2107	1492	1790	332	527	348.259	380.374	1389	6	167	120.877	22.945	34.309
NorthernBobwhite_SimpleContig_ 1415	5465	9136	4597	4539	3588	4072	563	878	549.959	770.098	2294	7	178	130.398	22.914	36.889
NorthernBobwhite_SimpleContig_ 1416	9964	18332	9088	9244	7762	8334	754	1387	721.527	1104.22	4545	3	209	143.216	23.693	39.452
NorthernBobwhite_SimpleContig_ 1417	4559	8599	4372	4227	3138	4156	537	714	418.632	539.36	2486	1	211	139.637	34.384	45.931
NorthernBobwhite_SimpleContig_ 1418	4553	8659	4384	4275	2768	4268	558	1018	458.42	609.875	2870	0	220	140.414	41.012	43.268
NorthernBobwhite_SimpleContig_ 1419	5417	12136	6135	6001	4262	5788	817	1222	532.185	746.52	3529	11	285	164.938	30.749	43.991
NorthernBobwhite_SimpleContig_ 1420	8598	15517	7741	7776	6098	7278	688	1368	631.04	989.924	5138	8	224	139.23	27.058	39.625
NorthernBobwhite_SimpleContig_ 1421	408	640	372	268	58	184	124	268	261.552	22.48	235	4	167	108.069	41.418	43.873
NorthernBobwhite_SimpleContig_ 1422	5025	11020	5510	5510	3928	5224	676	1137	503.719	685.373	2760	3	235	157.639	31.308	47.104
NorthernBobwhite_SimpleContig_ 1423	16715	16027	7987	8040	6882	7376	445	1247	807.29	1185.48	2811	0	127	73.206	15.689	38.881
NorthernBobwhite_SimpleContig_ 1424	7020	9773	4898	4875	3972	4468	419	882	538.151	823.182	3010	3	184	112.627	21.499	32.236
NorthernBobwhite_SimpleContig_ 1425	7115	12181	6041	6140	4914	5650	613	945	563.495	879.864	3546	8	217	134.226	22.545	36.824
NorthernBobwhite_SimpleContig_ 1426	4438	8254	4105	4149	2866	3744	774	832	437.315	565.63	2736	3	248	138.155	28.712	38.734
NorthernBobwhite_SimpleContig_ 1427	15078	23154	11569	11585	9980	10038	1284	1743	769.675	1182.84	5535	0	233	119.685	37.05	36.49
NorthernBobwhite_SimpleContig_ 1428	937	1877	940	937	486	724	268	388	275.498	33.194	326	17	236	152.523	40.015	38.207
NorthernBobwhite_SimpleContig_ 1429	2423	7324	3581	3743	2230	3596	553	912	283.181	116.405	2163	9	303	200.323	52.156	63.186
NorthernBobwhite_SimpleContig_ 1430	6242	11440	5700	5740	4464	5272	503	1137	560.055	800.041	2800	6	223	140.794	26.964	39.619
NorthernBobwhite_SimpleContig_ 1431	1243	15671	7755	7916	2382	3654	2484	7068	276.866	33.164	10286	96	2474	916.318	542.535	42.88
NorthernBobwhite_SimpleContig_ 1432	18050	31494	15750	15744	13490	15232	598	2021	756.81	1153.71	6331	5	247	135.379	26.146	37.435
NorthernBobwhite_SimpleContig_ 1433	7328	13160	6583	6577	5134	6050	634	1275	641.852	1009.81	3952	14	235	139.212	27.612	38.796
NorthernBobwhite_SimpleContig_ 1434	1951	3312	1658	1654	1040	1454	365	426	278.892	35.072	966	5	190	132.091	27.715	38.391
NorthernBobwhite_SimpleContig_ 1435	5274	12897	6478	6419	4516	6252	1037	1014	461.933	624.078	3528	3	248	166.56	31.751	58.039
NorthernBobwhite_SimpleContig_ 1436	7379	16901	8453	8448	6484	8138	771	1398	618.423	1002.38	4593	2	265	158.526	41.599	56.092
NorthernBobwhite_SimpleContig_ 1437	1797	4404	2243	2161	1142	2034	458	749	277.145	33.965	1511	6	251	171.106	40.63	55.704
NorthernBobwhite_SimpleContig_ 1438	1796	4424	2243	2181	1276	1896	616	620	274.248	31.849	1385	3	245	179.075	38.08	49.276
NorthernBobwhite_SimpleContig_ 1439	6308	12795	6388	6407	4628	6292	706	1118	578.639	862.265	3844	4	232	151.798	26.369	42.359
NorthernBobwhite_SimpleContig_ 1440	1921	3353	1696	1657	1094	1478	423	343	279.439	35.654	833	6	212	133.529	28.8	41.229
NorthernBobwhite_SimpleContig_ 1441	7114	14280	7129	7151	5368	6816	656	1368	627.739	916.399	4395	4	217	151.197	26.034	42.1
NorthernBobwhite_SimpleContig_ 1442	7094	18049	9015	9034	6164	9500	713	1593	587.837	876.365	3973	2	281	168.559	44.927	61.869
NorthernBobwhite_SimpleContig_ 1443	5029	8506	4331	4175	3360	3886	596	614	456.111	596.89	1518	8	196	132.276	23.598	37.343
NorthernBobwhite_SimpleContig_ 1444	4841	8191	4067	4124	3238	3614	587	716	453.718	597.247	1974	5	203	133.106	27.602	38.525
NorthernBobwhite_SimpleContig_ 1445	18847	36647	18324	18323	15448	17332	570	3132	785.677	1174.78	11192	4	239	148.401	26.716	41.041
NorthernBobwhite_SimpleContig_ 1446	5135	10287	5099	5188	3668	4916	542	1105	516.841	701.221	3530	6	223	149.847	26.499	42.726
NorthernBobwhite_SimpleContig_ 1447	5753	10273	5105	5168	3834	4776	543	1065	493.905	703.642	3145	10	207	134.734	25.744	39.997
NorthernBobwhite_SimpleContig_ 1448	4865	7927	3957	3970	3180	3426	468	816	435.63	564.78	2615	4	183	129.042	23.72	36.074
NorthernBobwhite_SimpleContig_ 1449	3651	7029	3482	3547	2498	3242	472	777	435.482	566.466	2261	7	213	146.187	25.505	41.194
NorthernBobwhite_SimpleContig_ 1450	542	54120	30299	23821	484	1860	8037	43406	252.409	29.339	38104	0	32599	6460.08	9157.96	35.978
NorthernBobwhite_SimpleContig_ 1451	3813	7333	3693	3640	2666	3388	572	663	444.963	571.509	2012	5	232	146.752	31.636	39.969
NorthernBobwhite_SimpleContig_ 1452	1011	21426	10614	10812	3246	5942	4903	7221	276.903	34.672	11429	41	4558	1523.97	847.607	42.631
NorthernBobwhite_SimpleContig_ 1453	2138	5543	2716	2827	1672	2622	510	705	278.782	32.859	1400	10	258	179.111	35.985	55.472
NorthernBobwhite_SimpleContig_ 1454	406	768	453	315	160	332	95	173	275.062	31.908	235	3	203	121.507	49.58	62.808
NorthernBobwhite_SimpleContig_ 1455	511	73315	35453	37862	11884	25804	4262	31019	273.852	35.086	34000	373	13809	10409.8	3573.86	42.661
NorthernBobwhite_SimpleContig_ 1456	9174	16283	8188	8095	6464	7808	649	1272	626.495	969.325	4331	6	225	138.694	26.55	38.326
NorthernBobwhite_SimpleContig_ 1457	1044	1951	1028	923	490	764	338	350	275.698	33.522	723	5	187	137.03	30.882	47.701
NorthernBobwhite_SimpleContig_ 1458	5414	8883	4396	4487	3420	4122	418	890	504.475	707.6	3030	6	201	127.836	25.399	37.403
NorthernBobwhite_SimpleContig_ 1459	3899	6457	3280	3177	2344	3074	515	496	448.171	589.182	1634	7	199	129.282	25.043	37.035
NorthernBobwhite_SimpleContig_ 1460	10701	19117	9625	9492	7862	8832	604	1727	701.62	1061.65	6397	2	218	138.548	25.947	38.837
NorthernBobwhite_SimpleContig_ 1461	8140	7679	3927	3752	3038	3624	409	574	728.069	1128.42	1306	4	124	70.97	16.298	42.027
NorthernBobwhite_SimpleContig_ 1462	598	866	437	429	220	332	168	139	276.382	31.906	162	5	171	113.542	40.176	33.445
NorthernBobwhite_SimpleContig_ 1463	851	1366	641	725	346	580	186	247	274.671	33.049	244	9	192	122.882	32.394	38.19
NorthernBobwhite_SimpleContig_ 1464	2769	4887	2390	2497	1682	1978	348	856	315.222	273.455	1476	6	195	139.097	26.869	37.125
NorthernBobwhite_SimpleContig_ 1465	8974	20259	10102	10157	7588	9824	752	1983	669.593	1030.94	7117	8	252	167.068	29.06	46.679
NorthernBobwhite_SimpleContig_ 1466	15661	25545	12753	12792	10976	10950	1318	2161	844.528	1249.85	6472	0	212	125.12	31.293	38.848
NorthernBobwhite_SimpleContig_ 1467	5439	4482	2278	2204	1732	2016	342	367	471.751	648.765	786	1	103	65.784	15.251	34.841
NorthernBobwhite_SimpleContig_ 1468	11375	20494	10293	10201	8772	9542	674	1409	715.87	1096.79	5056	7	218	138.361	22.026	38.224
NorthernBobwhite_SimpleContig_ 1469	873	1882	955	927	486	732	347	311	274.247	32.115	485	11	216	153.102	39.939	47.079
NorthernBobwhite_SimpleContig_ 1470	1628	3756	1862	1894	1078	1810	450	400	275.95	35.186	1183	14	233	170.236	35.704	46.007
NorthernBobwhite_SimpleContig_ 1471	3574	11115	5581	5534	3678	5490	718	1178	357.869	402.626	2520	22	292	212.303	38.482	58.814
NorthernBobwhite_SimpleContig_ 1472	2859	6677	3346	3331	2316	3130	261	918	319.46	292.969	1748	4	255	154.906	52.975	64.078
NorthernBobwhite_SimpleContig_ 1473	2551	3762	1858	1904	1390	1536	306	513	321.791	311.563	1361	7	174	118.691	30.773	33.908
NorthernBobwhite_SimpleContig_ 1474	4431	7397	3738	3659	2744	3384	479	759	467.961	628.592	1311	8	199	128.839	26.444	36.741
NorthernBobwhite_SimpleContig_ 1475	770	1055	539	516	260	438	137	217	274.338	34.896	341	8	157	105.07	25.608	35.455
NorthernBobwhite_SimpleContig_ 1476	3585	5748	2890	2858	2128	2492	447	649	377.177	447.376	1866	9	212	127.658	29.003	36.29
NorthernBobwhite_SimpleContig_ 1477	14440	21706	10934	10772	9376	10024	443	1744	639.394	991.813	6613	9	203	120.574	23.563	34.792
NorthernBobwhite_SimpleContig_ 1478	4468	8432	4184	4248	2830	3930	707	931	438.486	566.307	2943	11	237	143.32	34.09	39.884
NorthernBobwhite_SimpleContig_ 1479	6099	11183	5635	5548	4116	5250	899	865	567.803	790.234	2903	5	217	139.308	26.472	39.269
NorthernBobwhite_SimpleContig_ 1480	7052	12574	6279	6295	5244	5506	611	1155	570.384	866.85	2357	1	209	137.897	21.813	38.599
NorthernBobwhite_SimpleContig_ 1481	15143	26342	13194	13148	11524	11858	810	2043	703.268	1059.03	7394	5	270	136.676	24.777	37.014
NorthernBobwhite_SimpleContig_ 1482	9566	20398	10177	10221	7948	9708	715	1926	635.245	991.169	6181	8	251	158.781	30.954	45.264
NorthernBobwhite_SimpleContig_ 1483	3972	6204	3109	3095	2422	2760	396	590	363.322	417.972	1771	9	187	124.616	24.638	33.912
NorthernBobwhite_SimpleContig_ 1484	7265	15900	7922	7978	5786	7686	835	1517	577.183	826.127	4855	0	234	162.272	30.275	45.038
NorthernBobwhite_SimpleContig_ 1485	1331	2615	1320	1295	718	1106	295	486	277.103	35.592	455	2	200	144.66	35.624	42.825
NorthernBobwhite_SimpleContig_ 1486	1075	1831	914	917	500	766	139	420	274.676	34.705	321	7	179	131.933	30.495	38.326
NorthernBobwhite_SimpleContig_ 1487	4191	6578	3338	3240	2558	2828	449	710	379.1	456.314	2705	9	190	125.418	23.523	35.791
NorthernBobwhite_SimpleContig_ 1488	11652	20456	10234	10222	8568	9398	653	1740	742.714	1167.68	6187	1	229	136.454	28.41	38.174
NorthernBobwhite_SimpleContig_ 1489	5431	9124	4523	4601	3506	4094	562	885	487.962	691.506	2431	2	218	133.217	26.874	38.262
NorthernBobwhite_SimpleContig_ 1490	338	179	110	69	8	54	83	33	249.75	13.065	26	1	73	41.266	21.112	37.278
NorthernBobwhite_SimpleContig_ 1491	3358	5621	2822	2799	1894	2516	478	700	327.175	335.018	1924	3	196	129.478	33.619	38.684
NorthernBobwhite_SimpleContig_ 1492	2149	4986	2503	2483	1386	2270	581	724	275.98	32.846	1407	8	238	167.44	33.949	47.138
NorthernBobwhite_SimpleContig_ 1493	8526	18661	9290	9371	6844	9364	706	1677	668.937	985.306	5037	9	252	161.549	29.016	43.795
NorthernBobwhite_SimpleContig_ 1494	30484	58304	29270	29034	24956	28034	802	4210	822.309	1210.71	16997	0	231	146.118	24.621	41.071
NorthernBobwhite_SimpleContig_ 1495	1843	2814	1434	1380	800	1218	341	440	280.84	36.271	1313	5	178	119.896	26.747	39.067
NorthernBobwhite_SimpleContig_ 1496	11222	22322	11191	11131	9004	10602	458	2158	732.627	1104.65	6462	4	228	152.228	29.958	40.652
NorthernBobwhite_SimpleContig_ 1497	1281	1983	986	997	654	744	278	298	276.945	34.442	811	6	174	120.654	28.165	34.895
NorthernBobwhite_SimpleContig_ 1498	1167	2320	1146	1174	638	948	323	406	282.097	36.347	567	9	199	150.551	34.274	40.531
NorthernBobwhite_SimpleContig_ 1499	803	1380	682	698	388	526	142	318	273	32.299	491	3	190	135.276	36.924	40.722
NorthernBobwhite_SimpleContig_ 1500	5906	12004	6056	5948	4492	5660	677	1108	534.727	791.549	3490	7	236	154.312	31.443	40.789
NorthernBobwhite_SimpleContig_ 1501	7630	20312	10068	10244	7392	10018	918	1876	737.265	1093.94	5639	10	297	189.632	33.24	47.837
NorthernBobwhite_SimpleContig_ 1502	3219	7139	3611	3528	2466	3284	556	798	357.899	413.702	2194	8	236	165.445	29.449	46.07
NorthernBobwhite_SimpleContig_ 1503	3358	6654	3360	3294	2134	3024	679	779	341.133	370.765	2087	2	228	149.174	29.51	44.074
NorthernBobwhite_SimpleContig_ 1504	3881	6586	3181	3405	2380	2932	535	705	399.185	507.703	2109	7	189	133.218	24.17	35.584
NorthernBobwhite_SimpleContig_ 1505	7914	12884	6453	6431	5246	6022	474	1064	502.322	775.026	3356	5	190	129.832	22.963	34.989
NorthernBobwhite_SimpleContig_ 1506	1518	57507	28997	28510	15068	26130	7123	8893	276.961	34.326	16242	185	3699	2665.3	559.955	52.372
NorthernBobwhite_SimpleContig_ 1507	531	23988	12299	11689	4274	9150	2544	7906	272.451	33.329	8623	178	4052	3200.87	921.688	49.153
NorthernBobwhite_SimpleContig_ 1508	25157	48709	24445	24264	19830	23818	823	4000	825.026	1214.3	12381	3	241	143.497	26.368	42.827
NorthernBobwhite_SimpleContig_ 1509	4405	9350	4667	4683	3336	4374	659	949	479.875	636.918	2512	5	248	159.259	34.187	42.565
NorthernBobwhite_SimpleContig_ 1510	316	35389	17734	17655	166	1714	4805	28518	288.819	24.983	29692	0	12814	6535.02	3535.3	40.506
NorthernBobwhite_SimpleContig_ 1511	3926	7282	3650	3632	2466	3348	501	931	430.247	560.624	2268	8	231	138.842	34.61	40.601
NorthernBobwhite_SimpleContig_ 1512	5630	10114	5026	5088	3778	4592	744	942	532.721	781.531	3008	0	213	137.964	32.291	37.922
NorthernBobwhite_SimpleContig_ 1513	5275	9149	4673	4476	3524	4168	600	819	420.947	538.916	3050	1	197	135.666	27.564	38.066
NorthernBobwhite_SimpleContig_ 1514	19403	34410	17239	17171	14428	16464	602	2750	781.071	1172.85	10172	4	259	136.477	30.265	38.736
NorthernBobwhite_SimpleContig_ 1515	6181	9952	4932	5020	3860	4240	616	1192	615.885	908.15	3293	0	218	124.735	28.381	36.645
NorthernBobwhite_SimpleContig_ 1516	1377	3389	1684	1705	878	1532	503	463	277.105	34.309	1145	9	233	173.574	36.511	50.763
NorthernBobwhite_SimpleContig_ 1517	2677	3958	2019	1939	1502	1636	349	450	297.719	200.54	1071	3	168	118.666	22.44	33.358
NorthernBobwhite_SimpleContig_ 1518	16067	30287	15211	15076	12406	14592	845	2275	754.606	1144.43	8598	6	237	143.718	24.29	39.522
NorthernBobwhite_SimpleContig_ 1519	9932	22682	11415	11267	8330	11522	700	2012	649.317	990.592	6819	8	243	166.279	28.147	47.835
NorthernBobwhite_SimpleContig_ 1520	2740	1230	628	602	380	506	179	156	273.621	31.656	194	1	59	30.669	8.518	52.774
NorthernBobwhite_SimpleContig_ 1521	933	2117	1089	1028	608	888	221	389	278.609	32.907	561	15	241	163.229	53.331	48.339
NorthernBobwhite_SimpleContig_ 1522	4934	9024	4533	4491	3330	4130	671	845	425.004	550.253	2357	5	209	138.836	28.251	41.143
NorthernBobwhite_SimpleContig_ 1523	22657	36444	18328	18116	16456	16968	611	2267	792.83	1221.28	6221	3	220	125.974	24.574	34.016
NorthernBobwhite_SimpleContig_ 1524	3547	6577	3283	3294	2244	3100	528	681	378.319	459.274	2224	7	243	140.77	36.909	40.767
NorthernBobwhite_SimpleContig_ 1525	7192	14119	7076	7043	4848	7158	648	1409	566.755	873.875	4498	0	243	145.064	35.697	43.131
NorthernBobwhite_SimpleContig_ 1526	2962	5211	2582	2629	1762	2444	436	541	342.807	375.217	1670	3	190	137.916	24.818	37.643
NorthernBobwhite_SimpleContig_ 1527	7009	12077	6018	6059	4966	5498	507	1037	585.604	865.687	3609	5	231	134.126	26.374	38.065
NorthernBobwhite_SimpleContig_ 1528	3613	8674	4369	4305	2952	4226	635	811	367.362	432.611	2267	1	243	166.2	45.002	57.957
NorthernBobwhite_SimpleContig_ 1529	12218	25047	12372	12675	10010	12080	855	1984	694.403	1070.01	6953	12	275	154.617	26.726	43.338
NorthernBobwhite_SimpleContig_ 1530	3043	5227	2616	2611	1920	2238	487	547	318.042	292.114	1589	1	211	133.794	32.462	37.594
NorthernBobwhite_SimpleContig_ 1531	4791	9562	4662	4900	3528	4370	630	982	436.132	600.221	2781	5	215	152.548	26.634	42.225
NorthernBobwhite_SimpleContig_ 1532	1633	3203	1614	1589	934	1480	369	400	277.55	35.156	698	4	221	145.001	33.21	47.642
NorthernBobwhite_SimpleContig_ 1533	3401	6652	3367	3285	2252	3200	568	604	398.293	501.861	1500	5	245	148.621	39.734	41.4
NorthernBobwhite_SimpleContig_ 1534	2320	4756	2299	2457	1450	2176	529	576	284.233	108.395	1232	7	219	150.813	28.653	44.483
NorthernBobwhite_SimpleContig_ 1535	8290	14894	7522	7372	5754	7022	541	1487	605.189	896.561	4584	6	234	134.185	39.305	43.04
NorthernBobwhite_SimpleContig_ 1536	1540	2594	1311	1283	798	1098	348	338	274.642	32.763	1065	6	190	131.869	32.085	36.104
NorthernBobwhite_SimpleContig_ 1537	474	380	195	185	68	154	91	63	277.735	34.567	77	3	88	62.688	21.533	39.03
NorthernBobwhite_SimpleContig_ 1538	7829	20195	10099	10096	7654	9948	862	1608	574.959	896.884	6255	3	329	182.297	45.321	55.716
NorthernBobwhite_SimpleContig_ 1539	3623	5955	2944	3011	2288	2584	560	499	422.084	546.089	1838	5	215	130.773	24.992	35.413
NorthernBobwhite_SimpleContig_ 1540	855	1651	840	811	432	678	215	320	276.31	34.489	319	2	200	147.283	39.626	44.678
NorthernBobwhite_SimpleContig_ 1541	5549	9200	4640	4560	3530	4042	480	1098	501.892	701.354	3567	3	225	130.287	28.721	36.601
NorthernBobwhite_SimpleContig_ 1542	11667	18387	9217	9170	8064	8390	431	1406	647.094	1012.37	5304	4	219	125.973	22.022	35.202
NorthernBobwhite_SimpleContig_ 1543	1179	2383	1197	1186	634	1110	189	442	275.773	34.207	532	5	201	149.512	36.202	44.275
NorthernBobwhite_SimpleContig_ 1544	700	1005	500	505	290	362	125	225	278.345	36.383	166	5	147	111.574	29.602	30.143
NorthernBobwhite_SimpleContig_ 1545	8998	22955	11522	11433	8746	11486	761	1852	649.623	1017.28	5632	7	283	182.554	32.6	51.289
NorthernBobwhite_SimpleContig_ 1546	3593	6328	3136	3192	2246	2866	612	578	356.764	406.897	2321	4	189	137.156	23.992	38.825
NorthernBobwhite_SimpleContig_ 1547	5243	8539	4319	4220	3248	3778	656	809	407.755	521.832	2376	7	216	125.567	23.785	39.767
NorthernBobwhite_SimpleContig_ 1548	3989	8899	4508	4391	2950	4194	444	1273	414.172	534.274	3165	7	249	157.571	34.936	53.372
NorthernBobwhite_SimpleContig_ 1549	12855	23242	11656	11586	9580	10872	542	2127	705.338	1070.66	6274	5	227	138.867	24.983	38.242
NorthernBobwhite_SimpleContig_ 1550	13139	11663	5888	5775	5064	5236	361	932	740.762	1097.24	2113	2	123	68.371	15.848	37.438
NorthernBobwhite_SimpleContig_ 1551	2779	6259	3137	3122	1930	2924	690	687	330.497	337.05	2106	7	242	163.931	33.773	47.175
NorthernBobwhite_SimpleContig_ 1552	612	627	311	316	138	190	198	99	279.087	38.82	104	1	121	74.672	25.568	48.529
NorthernBobwhite_SimpleContig_ 1553	1348	2630	1226	1404	566	972	274	794	273.777	33.36	761	11	406	114.803	57.313	58.976
NorthernBobwhite_SimpleContig_ 1554	3110	6871	3509	3362	2270	3232	573	757	343.707	377.098	2126	5	225	160.933	27.582	50
NorthernBobwhite_SimpleContig_ 1555	3629	7854	3927	3927	2696	3502	701	932	472.417	621.434	2255	8	233	159.923	26.674	46.073
NorthernBobwhite_SimpleContig_ 1556	2772	6835	3381	3454	2146	3230	715	715	373.997	443.533	1703	6	245	177.97	35.114	51.227
NorthernBobwhite_SimpleContig_ 1557	5000	11558	5766	5792	3896	5676	681	1247	539.888	731.089	3280	9	255	164.653	29.994	49.82
NorthernBobwhite_SimpleContig_ 1558	2345	5161	2614	2547	1524	2512	536	562	279.828	78.737	1519	1	217	157.748	32.549	50.704
NorthernBobwhite_SimpleContig_ 1559	10441	23838	11969	11869	9322	11448	799	2148	675.312	1004.94	6816	8	266	165.293	29.498	47.553
NorthernBobwhite_SimpleContig_ 1560	37235	81305	40855	40450	33406	40354	1035	6134	798.721	1196.28	22604	6	268	161.285	28.097	45.049
NorthernBobwhite_SimpleContig_ 1561	15254	28390	14094	14296	12026	13420	630	2186	750.302	1142.91	7120	1	232	140.919	29.556	41.484
NorthernBobwhite_SimpleContig_ 1562	2882	4844	2413	2431	1534	2112	477	692	338.898	344.448	1481	4	189	129.503	33.942	38.619
NorthernBobwhite_SimpleContig_ 1563	4751	9264	4595	4669	3206	4158	693	1160	470.184	622.441	2992	8	257	147.866	30.329	40.202
NorthernBobwhite_SimpleContig_ 1564	33518	15714	7810	7904	6568	7842	160	1075	719.381	1132.14	2391	2	76	32.261	8.602	55.078
NorthernBobwhite_SimpleContig_ 1565	7015	14239	7078	7161	5556	6784	690	1135	564.45	837.396	4369	6	231	155.707	26.732	41.483
NorthernBobwhite_SimpleContig_ 1566	14460	26624	13380	13244	10772	12704	665	2381	729.445	1105.15	7149	0	220	139.25	27.337	40.754
NorthernBobwhite_SimpleContig_ 1567	2972	6163	3114	3049	2008	2780	466	879	337.559	349.592	1708	6	251	153.616	32.88	45.424
NorthernBobwhite_SimpleContig_ 1568	11356	24894	12322	12572	9684	12066	771	2261	756.712	1134.35	7618	13	259	162.438	29.721	45.395
NorthernBobwhite_SimpleContig_ 1569	686	922	482	440	238	318	182	177	275.613	35.272	145	7	152	103.991	27.811	30.466
NorthernBobwhite_SimpleContig_ 1570	9011	15864	7926	7938	6060	7694	537	1481	616.142	937.173	5191	2	235	132.276	32.94	41.427
NorthernBobwhite_SimpleContig_ 1571	8580	17461	8774	8687	6780	8382	726	1484	654.832	990.096	5227	9	241	154.976	27.33	41.34
NorthernBobwhite_SimpleContig_ 1572	3087	5024	2500	2524	1854	2220	327	599	370.122	430.357	1666	10	179	130.223	24.232	38.095
NorthernBobwhite_SimpleContig_ 1573	2290	3776	1865	1911	1348	1596	379	427	279.978	35.277	1350	8	172	134.133	22.166	38.69
NorthernBobwhite_SimpleContig_ 1574	2595	5149	2521	2628	1408	2412	528	778	302.608	231.931	1176	6	232	145.664	31.599	43.198
NorthernBobwhite_SimpleContig_ 1575	5684	11271	5654	5617	4142	5566	544	962	485.9	652.361	3108	6	231	149.584	32.251	42.47
NorthernBobwhite_SimpleContig_ 1576	1800	2823	1408	1415	826	1158	370	459	276.31	33.401	919	0	178	119.631	26.544	37.167
NorthernBobwhite_SimpleContig_ 1577	21161	35870	17938	17932	15634	16910	807	2359	799.55	1201.33	7540	7	230	131.662	25.644	37.621
NorthernBobwhite_SimpleContig_ 1578	2132	3674	1856	1818	1144	1646	347	519	282.444	34.153	979	1	191	131.71	30.57	38.602
NorthernBobwhite_SimpleContig_ 1579	2298	3844	1911	1933	1270	1582	421	549	277.844	34.788	1505	1	192	130.871	32.573	38.642
NorthernBobwhite_SimpleContig_ 1580	1280	3103	1482	1621	866	1568	264	398	274.083	33.019	584	1	241	162.13	56.606	62.266
NorthernBobwhite_SimpleContig_ 1581	1778	3785	2019	1766	1136	1750	319	568	276.641	33.284	1167	1	239	149.028	53.937	54.443
NorthernBobwhite_SimpleContig_ 1582	10717	22820	11428	11392	8726	11472	702	1807	699.737	1077.33	6525	10	244	157.837	28.184	43.744
NorthernBobwhite_SimpleContig_ 1583	1493	3732	1970	1762	1092	1836	341	441	277.092	34.106	849	2	239	166.813	51.066	60.147
NorthernBobwhite_SimpleContig_ 1584	4853	11094	5585	5509	4156	4826	821	1234	482.775	669.488	2673	0	253	164.542	36.128	48.815
NorthernBobwhite_SimpleContig_ 1585	7582	17198	8638	8560	6708	7964	926	1518	668.4	1012.21	4751	5	288	168.49	34.963	45.595
NorthernBobwhite_SimpleContig_ 1586	14491	29875	15063	14812	12018	14160	714	2832	767.447	1144.92	9469	16	261	151.508	30.655	44.352
NorthernBobwhite_SimpleContig_ 1587	10127	23637	11711	11926	9000	11472	868	2175	717.184	1119.1	7126	8	266	167.962	27.209	49.462
NorthernBobwhite_SimpleContig_ 1588	4048	6732	3417	3315	2464	3014	621	594	392.329	495.515	1891	8	191	131.673	22.329	35.03
NorthernBobwhite_SimpleContig_ 1589	341	443	231	212	54	126	99	164	263.259	23.902	94	5	169	103.37	46.826	35.191
NorthernBobwhite_SimpleContig_ 1590	2874	4795	2403	2392	1714	2076	423	562	364.973	427.112	1567	8	208	130.451	29.966	36.534
NorthernBobwhite_SimpleContig_ 1591	11395	24949	12484	12465	9658	12020	861	2247	772.441	1199.21	7482	8	259	160.367	26.351	47.38
NorthernBobwhite_SimpleContig_ 1592	3946	6608	3278	3330	2386	3052	508	640	388.949	476.088	2063	3	218	129.83	29.439	36.214
NorthernBobwhite_SimpleContig_ 1593	3060	5269	2584	2685	1836	2306	447	652	346.925	374.735	2014	5	188	134.881	22.812	40.033
NorthernBobwhite_SimpleContig_ 1594	4181	7356	3639	3717	2680	3296	556	797	434.417	570.928	2133	11	210	136.754	27.417	36.451
NorthernBobwhite_SimpleContig_ 1595	5163	9781	4894	4887	3648	4540	576	963	492.461	701.362	3227	4	229	143.202	33.501	41.681
NorthernBobwhite_SimpleContig_ 1596	6211	13748	6866	6882	5200	6322	757	1396	595.096	911.888	3160	0	271	166.182	32.462	43.552
NorthernBobwhite_SimpleContig_ 1597	15910	25989	13050	12939	11324	11938	550	2054	676.478	1043.92	7773	5	210	129.573	24.387	36.53
NorthernBobwhite_SimpleContig_ 1598	5367	9979	5006	4973	3576	4602	639	1111	459.16	606.018	3222	7	213	142.603	28.247	40.004
NorthernBobwhite_SimpleContig_ 1599	14786	31734	15819	15915	12252	15952	876	2535	748.744	1132.01	7319	11	258	158.847	33.097	44.806
NorthernBobwhite_SimpleContig_ 1600	13332	27055	13512	13543	10958	13138	788	2050	732.578	1103.28	8150	5	237	154.131	27.708	41.989
NorthernBobwhite_SimpleContig_ 1601	22070	34867	17518	17349	15174	16088	629	2783	700.502	1062.2	10190	0	204	124.87	24.803	34.735
NorthernBobwhite_SimpleContig_ 1602	2548	4467	2193	2274	1476	1900	478	591	297.841	208.346	1418	6	198	136.766	26.563	40.228
NorthernBobwhite_SimpleContig_ 1603	21901	41933	20985	20948	17156	20160	577	3820	769.27	1187.55	11627	4	238	146.562	25.011	40.167
NorthernBobwhite_SimpleContig_ 1604	544	10403	5053	5350	2176	3976	762	3435	271.557	33.21	3923	62	2035	1473.32	500.007	40.441
NorthernBobwhite_SimpleContig_ 1605	3207	5802	2888	2914	2100	2596	538	546	357.929	402.5	1587	3	195	139.075	25.323	41.378
NorthernBobwhite_SimpleContig_ 1606	23448	27536	13761	13775	11302	12700	1343	2054	744.83	1163.29	5463	1	375	88.799	30.053	40.673
NorthernBobwhite_SimpleContig_ 1607	3145	6082	3034	3048	2138	2758	480	672	371.266	440.707	1867	7	210	148.282	27.792	39.523
NorthernBobwhite_SimpleContig_ 1608	2898	5420	2716	2704	1930	2342	543	580	348.147	384.85	1991	3	215	143.896	29.442	39.89
NorthernBobwhite_SimpleContig_ 1609	1497	1527	794	733	426	700	210	183	275.408	33.483	230	2	119	70.138	27.304	55.444
NorthernBobwhite_SimpleContig_ 1610	5919	15272	7823	7449	4948	7506	1205	1524	465.147	636.385	2609	2	769	171.788	52.158	52.644
NorthernBobwhite_SimpleContig_ 1611	579	40537	20008	20529	3630	11392	8991	16356	264.117	28.458	18168	5	11412	5161.97	4516.89	40.069
NorthernBobwhite_SimpleContig_ 1612	4779	9541	4809	4732	3380	4554	631	937	471.269	631.877	2470	7	237	147.707	25.629	43.733
NorthernBobwhite_SimpleContig_ 1613	12348	25846	12966	12880	10508	12400	715	2116	812.947	1199.04	6631	6	237	153.027	28.864	45.238
NorthernBobwhite_SimpleContig_ 1614	1475	2216	1081	1135	712	922	271	297	273.64	29.769	591	5	175	117.279	32.082	33.695
NorthernBobwhite_SimpleContig_ 1615	839	87576	45377	42199	20944	33152	7323	25742	274.848	33.295	41556	360	11585	7751.11	2474.19	46.246
NorthernBobwhite_SimpleContig_ 1616	614	956	472	484	244	328	106	276	275.615	32.072	308	7	176	120.748	37.764	36.156
NorthernBobwhite_SimpleContig_ 1617	3768	6618	3330	3288	2326	2984	510	759	376.902	455.332	2082	2	202	138.306	28.204	38.296
NorthernBobwhite_SimpleContig_ 1618	12761	28474	14187	14287	11160	14132	732	2303	732.95	1118.63	7716	3	270	161.455	27.064	48.17
NorthernBobwhite_SimpleContig_ 1619	5152	13167	6584	6583	4392	6598	771	1324	531.526	730.696	4149	8	322	177.999	34.434	55.299
NorthernBobwhite_SimpleContig_ 1620	9865	18423	9282	9141	7376	8552	761	1663	740.242	1145.25	5605	8	227	141.845	30.366	40.193
NorthernBobwhite_SimpleContig_ 1621	2158	4756	2361	2395	1332	2316	558	532	278.553	34.488	1421	2	244	151.929	44.317	56.719
NorthernBobwhite_SimpleContig_ 1622	17357	44380	22226	22154	17602	22210	1120	3244	799.823	1163.9	12047	14	289	182.761	33.721	51.092
NorthernBobwhite_SimpleContig_ 1623	2830	5234	2625	2609	1718	2386	531	569	330.062	324.869	1701	4	197	139.955	29.807	41.731
NorthernBobwhite_SimpleContig_ 1624	553	488	246	242	76	132	170	97	268.868	29.547	132	2	113	65.043	25.737	37.975
NorthernBobwhite_SimpleContig_ 1625	3380	7362	3732	3630	2314	3496	678	841	387.987	476.429	2073	9	243	158.592	32.889	45.296
NorthernBobwhite_SimpleContig_ 1626	2909	4371	2231	2140	1512	1922	462	448	298.347	203.451	1709	4	173	117.985	24.113	33.998
NorthernBobwhite_SimpleContig_ 1627	11487	23048	11604	11444	9120	11066	653	2087	716.947	1081.51	6297	1	268	149.507	36.757	42.535
NorthernBobwhite_SimpleContig_ 1628	4483	10251	5190	5061	3522	4764	643	1273	458.183	603.411	3351	7	245	170.002	26.729	44.055
NorthernBobwhite_SimpleContig_ 1629	1359	3495	1755	1740	942	1520	531	481	277.514	34.456	890	11	308	183.316	53.336	52.244
NorthernBobwhite_SimpleContig_ 1630	6062	10858	5355	5503	4268	5140	592	787	545.987	798.267	2684	1	201	134.829	24.605	41.669
NorthernBobwhite_SimpleContig_ 1631	3833	6368	3229	3139	2240	2890	501	703	386.495	471.197	1544	5	216	129.83	25.734	36.29
NorthernBobwhite_SimpleContig_ 1632	2771	4944	2495	2449	1742	2264	465	445	319.127	285.842	1624	8	202	140.278	30.903	38.65
NorthernBobwhite_SimpleContig_ 1633	1842	2840	1437	1403	954	1182	302	390	275.187	33.931	577	5	171	120.965	27.562	36.156
NorthernBobwhite_SimpleContig_ 1634	8554	17279	8708	8571	6556	8164	545	1926	729.652	1085.79	5103	0	247	149.954	32.598	43.43
NorthernBobwhite_SimpleContig_ 1635	10620	19509	9754	9755	7990	9178	657	1586	715.315	1106.24	5523	7	229	139.8	27.744	39.925
NorthernBobwhite_SimpleContig_ 1636	91870	42369	21252	21117	17906	20730	475	3038	781.289	1168.34	6505	0	69	32.068	8.43	53.073
NorthernBobwhite_SimpleContig_ 1637	4473	5970	3009	2961	2232	2700	444	574	450.584	593.482	1768	2	189	104.799	41.741	35.301
NorthernBobwhite_SimpleContig_ 1638	4142	8068	4016	4052	2770	3954	615	688	443.332	585.452	1917	11	225	146.235	31.17	40.922
NorthernBobwhite_SimpleContig_ 1639	6874	3591	1819	1772	1188	1756	258	376	520.837	765.972	587	0	87	34.294	10.945	56.677
NorthernBobwhite_SimpleContig_ 1640	7040	13724	6862	6862	5168	6506	784	1184	602.807	959.238	4098	9	218	147.78	23.353	42.088
NorthernBobwhite_SimpleContig_ 1641	6904	13691	6786	6905	5096	6604	559	1368	597.203	909.727	3913	8	256	147.715	31.224	42.106
NorthernBobwhite_SimpleContig_ 1642	7349	16097	8003	8094	5772	7798	580	1857	657.422	1011.38	4725	5	241	152.454	35.172	56.293
NorthernBobwhite_SimpleContig_ 1643	5249	12218	6097	6121	4220	6074	532	1343	551.005	746.491	3712	2	256	165.279	35.968	49.209
NorthernBobwhite_SimpleContig_ 1644	1686	3106	1527	1579	930	1386	369	404	274.886	33.033	1035	4	210	141.262	29.574	41.518
NorthernBobwhite_SimpleContig_ 1645	969	899	461	438	248	318	176	154	273.54	33.931	146	1	103	71.142	17.834	38.493
NorthernBobwhite_SimpleContig_ 1646	607	434	216	218	126	154	98	52	272.381	35.366	76	2	94	57.822	21.261	34.926
NorthernBobwhite_SimpleContig_ 1647	665	500	250	250	116	180	116	85	276.5	34.823	92	1	93	58.287	18.391	34.887
NorthernBobwhite_SimpleContig_ 1648	61274	55537	27716	27821	24712	25964	742	3860	852.336	1289.55	10113	0	279	70.211	16.417	38.192
NorthernBobwhite_SimpleContig_ 1649	585	1293	646	647	272	578	141	297	271.11	31.062	381	7	226	158.085	52.072	47.009
NorthernBobwhite_SimpleContig_ 1650	8789	13917	6956	6961	5652	6628	467	1102	560.548	869.026	4753	8	186	125.637	20.699	35.715
NorthernBobwhite_SimpleContig_ 1651	6643	13611	6748	6863	5240	6484	628	1201	603.441	898.111	3689	9	245	153.254	28.108	42.511
NorthernBobwhite_SimpleContig_ 1652	6293	12852	6417	6435	4702	6026	682	1381	629.965	902.055	3355	5	237	152.774	26.661	43.048
NorthernBobwhite_SimpleContig_ 1653	5179	8939	4451	4488	3338	4226	610	722	531.738	802.648	2702	6	226	132.483	25.914	38.675
NorthernBobwhite_SimpleContig_ 1654	13509	29281	14676	14605	12052	13978	748	2337	815.383	1227.4	9437	5	244	159.481	27.848	45.962
NorthernBobwhite_SimpleContig_ 1655	19743	31820	15909	15911	13948	14908	741	2046	738.735	1134.13	5602	4	211	127.455	23.159	35.349
NorthernBobwhite_SimpleContig_ 1656	1072	248454	125085	123369	65724	118562	305	62533	276.263	34.189	126319	1044	21846	16844.3	3675.57	47.108
NorthernBobwhite_SimpleContig_ 1657	3298	6186	3103	3083	2192	2856	576	542	380.982	463.373	1653	2	239	145.599	36.154	38.296
NorthernBobwhite_SimpleContig_ 1658	3021	4536	2245	2291	1676	1990	389	462	357.371	402.901	1103	2	190	116.315	26.482	35.849
NorthernBobwhite_SimpleContig_ 1659	1047	1105	564	541	302	388	212	199	276.444	37.146	312	0	142	82.566	42.946	38.204
NorthernBobwhite_SimpleContig_ 1660	5139	9576	4846	4730	3390	4516	597	1027	519.077	714.882	2900	6	216	140.569	27.898	39.191
NorthernBobwhite_SimpleContig_ 1661	5793	9978	5034	4944	3854	4696	523	856	511.538	763.886	2714	5	218	135.165	25.72	36.579
NorthernBobwhite_SimpleContig_ 1662	12098	23748	11847	11901	9384	11816	730	1718	764.288	1177.23	4907	1	251	146.64	33.386	42.139
NorthernBobwhite_SimpleContig_ 1663	4333	7276	3608	3668	2706	3238	705	605	420.203	539.66	1274	5	210	130.363	26.876	35.703
NorthernBobwhite_SimpleContig_ 1664	6638	10216	5096	5120	4232	4618	349	977	493.629	712.093	3089	1	181	123.475	23.968	35.131
NorthernBobwhite_SimpleContig_ 1665	1037	1890	973	917	512	778	268	326	277.16	35.439	674	7	247	130.074	69.192	54.484
NorthernBobwhite_SimpleContig_ 1666	962	322962	155214	167748	24612	37004	15245	244343	269.176	29.202	179314	0	87494	24166	21778.4	40.541
NorthernBobwhite_SimpleContig_ 1667	521	126890	68711	58179	2052	10344	9001	104818	272.338	33.953	74062	0	70149	17323.1	20309.7	37.428
NorthernBobwhite_SimpleContig_ 1668	1258	899	436	463	312	188	302	88	279.705	36.27	190	1	80	55.254	15.864	37.997
NorthernBobwhite_SimpleContig_ 1669	12183	21128	10489	10639	8576	9738	775	1937	773.676	1206.81	6892	7	214	130.699	35.748	41.5
NorthernBobwhite_SimpleContig_ 1670	33877	72474	36173	36301	28896	36500	955	5724	830.366	1229.96	20312	4	248	156.879	27.717	45.438
NorthernBobwhite_SimpleContig_ 1671	5777	12032	5969	6063	4660	5464	821	1043	539.794	769.224	2957	13	251	156.383	28.289	42.479
NorthernBobwhite_SimpleContig_ 1672	3951	6820	3482	3338	2422	2932	490	943	411.884	518.661	1926	2	210	132.868	26.609	38.573
NorthernBobwhite_SimpleContig_ 1673	8564	14346	7130	7216	5688	6640	502	1459	658.743	1070.22	3528	0	236	130.279	29.586	35.042
NorthernBobwhite_SimpleContig_ 1674	26979	44659	22365	22294	19658	21018	666	3111	744.322	1125.31	10521	3	249	130.087	25.11	36.31
NorthernBobwhite_SimpleContig_ 1675	3026	5474	2713	2761	1730	2678	451	584	351.005	399.364	1659	8	209	131.028	35.267	46.067
NorthernBobwhite_SimpleContig_ 1676	2921	5267	2665	2602	1902	2362	527	446	341.691	358.764	1245	0	226	137.869	32.234	39.37
NorthernBobwhite_SimpleContig_ 1677	3013	5680	2861	2819	1784	2676	627	572	340.152	362.114	1006	5	216	140.203	32.101	38.633
NorthernBobwhite_SimpleContig_ 1678	24389	14203	7083	7120	5240	6830	487	1588	619.69	913.406	2857	1	275	41.506	42.487	50.371
NorthernBobwhite_SimpleContig_ 1679	2611	5054	2542	2512	1650	2180	388	806	298.956	215.074	1393	9	198	147.285	25.686	41.517
NorthernBobwhite_SimpleContig_ 1680	6676	14147	7025	7122	5162	6800	1046	1077	564.835	848.722	2870	10	233	159.373	25.516	41.552
NorthernBobwhite_SimpleContig_ 1681	10724	17451	8666	8785	7640	7862	533	1329	607.756	924.918	4922	3	239	130.191	23.756	35.472
NorthernBobwhite_SimpleContig_ 1682	6306	9133	4630	4503	3610	4182	380	911	498.467	747.321	2792	5	194	115.336	24.876	34.729
NorthernBobwhite_SimpleContig_ 1683	937	187422	95046	92376	44834	100488	360	40717	275.502	33.757	73449	696	17944	13707.4	3240.86	54.536
NorthernBobwhite_SimpleContig_ 1684	1085	33949	17025	16924	9708	12758	3951	7381	276.073	33.545	11446	124	3527	2527.15	636.645	32.258
NorthernBobwhite_SimpleContig_ 1685	336	9752	4769	4983	970	2466	1024	5245	261.821	24.198	4609	132	3197	2290.91	887.922	35.714
NorthernBobwhite_SimpleContig_ 1686	3930	6282	3148	3134	2362	2822	445	627	400.555	510.72	1786	6	187	127.25	23.825	36.412
NorthernBobwhite_SimpleContig_ 1687	9141	14639	7323	7316	5830	6530	694	1516	647.684	1034.59	4452	0	249	123.976	30.476	33.454
NorthernBobwhite_SimpleContig_ 1688	7714	12009	6052	5957	4820	5620	460	1059	611.3	926.869	3482	1	196	123.046	25.255	34.586
NorthernBobwhite_SimpleContig_ 1689	8743	16850	8423	8427	6732	7936	637	1438	656.933	976.539	4947	5	241	146.648	29.164	39.266
NorthernBobwhite_SimpleContig_ 1690	17307	30698	15331	15367	12822	14470	616	2644	771.363	1193.53	8856	0	238	136.002	29.311	38.135
NorthernBobwhite_SimpleContig_ 1691	4339	7733	3877	3856	2934	3504	440	818	445.271	581.432	2264	6	203	138.035	25.302	40.055
NorthernBobwhite_SimpleContig_ 1692	4416	11375	5688	5687	3846	5602	699	1170	425.939	543.221	4023	14	268	182.977	32.667	53.601
NorthernBobwhite_SimpleContig_ 1693	14195	26947	13388	13559	11366	12486	711	2249	747.873	1137.42	8029	0	236	145.431	24.28	40.338
NorthernBobwhite_SimpleContig_ 1694	2968	5486	2723	2763	1796	2474	593	595	319.893	297.942	1056	12	210	141.777	24.915	38.477
NorthernBobwhite_SimpleContig_ 1695	5995	10776	5402	5374	4120	4854	774	968	556.769	810.596	2717	5	201	137.057	23.973	38.232
NorthernBobwhite_SimpleContig_ 1696	5968	12583	6388	6195	4334	6128	761	1292	562.984	876.528	3425	8	225	149.096	28.884	48.542
NorthernBobwhite_SimpleContig_ 1697	10124	17334	8752	8582	6740	7902	1019	1584	629.534	1013.59	3319	7	231	132.35	26.812	38.67
NorthernBobwhite_SimpleContig_ 1698	14034	33556	16721	16835	12994	16710	945	2743	699.437	1054.03	9175	13	250	173.517	25.991	49.337
NorthernBobwhite_SimpleContig_ 1699	19817	31760	15860	15900	13852	15006	597	2146	695.681	1094.05	7717	6	219	126.627	22.553	35.384
NorthernBobwhite_SimpleContig_ 1700	2010	4471	2216	2255	1310	2178	526	436	276.855	34.761	906	11	251	162.216	39.929	44.08
NorthernBobwhite_SimpleContig_ 1701	19189	40870	20523	20347	17112	19888	638	3052	786.164	1187.57	12237	10	245	159.486	25.186	44.348
NorthernBobwhite_SimpleContig_ 1702	26861	54353	27174	27179	22754	26974	834	3540	829.222	1240.43	9434	4	274	151.877	27.287	41.752
NorthernBobwhite_SimpleContig_ 1703	6634	12116	6031	6085	4586	5506	676	1301	566.911	801.292	3758	4	242	137.497	33.696	39.81
NorthernBobwhite_SimpleContig_ 1704	4239	3836	1925	1911	1484	1686	309	337	397.678	499.727	728	2	120	70.595	13.222	37.981
NorthernBobwhite_SimpleContig_ 1705	802	234340	115567	118773	56150	120738	447	55511	275.921	34.066	118891	1306	27329	20301.4	4836.48	51.372
NorthernBobwhite_SimpleContig_ 1706	11090	21729	10869	10860	7926	9856	1319	2526	637.822	933.596	7168	0	728	147.401	54.529	40.893
NorthernBobwhite_SimpleContig_ 1707	3929	7481	3728	3753	2108	3428	894	1023	285.54	125.24	2070	9	221	131.29	41.54	53.092
NorthernBobwhite_SimpleContig_ 1708	15527	13646	6792	6854	5518	6418	565	1067	710.548	1086.5	2496	0	443	67.799	23.741	38.301
NorthernBobwhite_SimpleContig_ 1709	2447	3750	1892	1858	1324	1670	298	447	287.237	135.538	1249	3	176	124.26	25.552	33.388
NorthernBobwhite_SimpleContig_ 1710	7176	12081	6066	6015	4818	5418	518	1264	585.295	850.141	4093	5	198	131.946	26.081	38.852
NorthernBobwhite_SimpleContig_ 1711	854	305069	153855	151214	81114	132818	11319	78409	277.669	34.264	66869	1321	28852	23164.9	5738.15	65.105
NorthernBobwhite_SimpleContig_ 1712	17136	37281	18543	18738	15348	18168	676	2898	804.037	1168.32	9568	8	238	161.122	28.061	44.894
NorthernBobwhite_SimpleContig_ 1713	4244	7897	3871	4026	2764	3638	621	827	453.042	599.753	2679	7	234	143.12	29.008	38.501
NorthernBobwhite_SimpleContig_ 1714	8864	19195	9662	9533	7174	9528	792	1605	683.707	1041.91	5741	1	222	157.506	25.457	46.469
NorthernBobwhite_SimpleContig_ 1715	4699	10448	5195	5253	3564	4878	848	1094	436.324	569.562	3293	4	243	160.985	30.376	48.627
NorthernBobwhite_SimpleContig_ 1716	3758	7439	3780	3659	2438	3360	667	930	418.324	544.592	2428	8	368	149.987	39.784	40.287
NorthernBobwhite_SimpleContig_ 1717	4843	7257	3612	3645	2724	3214	581	706	414.808	529.745	2486	1	209	117.738	21.841	34.152
NorthernBobwhite_SimpleContig_ 1718	3950	172722	86127	86595	61698	75052	13867	21278	419.473	540.565	38302	0	4433	3397.23	666.156	38.481
NorthernBobwhite_SimpleContig_ 1719	3481	7928	3949	3979	2608	3636	836	804	389.071	485.93	2465	9	282	165.194	36.469	48.549
NorthernBobwhite_SimpleContig_ 1720	17105	36391	18242	18149	14662	17910	830	2806	740.722	1134.45	10139	8	259	158.554	27.782	43.508
NorthernBobwhite_SimpleContig_ 1721	17755	31102	15587	15515	13954	13968	647	2361	755.694	1154.65	10833	2	211	137.515	26.143	38.524
NorthernBobwhite_SimpleContig_ 1722	3167	5100	2506	2594	1842	2320	422	491	389.532	482.763	1403	7	186	127.081	25.59	34.544
NorthernBobwhite_SimpleContig_ 1723	7327	10723	5419	5304	4422	4574	567	1107	578.705	936.192	3381	4	182	116.05	26.31	33.151
NorthernBobwhite_SimpleContig_ 1724	2153	4396	2224	2172	1316	2066	446	553	275.784	33.914	1284	8	238	152.833	39.221	41.895
NorthernBobwhite_SimpleContig_ 1725	28464	46353	23123	23230	20564	21714	681	3173	780.41	1190.66	9700	10	219	127.393	22.093	35.684
NorthernBobwhite_SimpleContig_ 1726	2161	3954	1936	2018	1176	1866	449	449	280.143	37.3	1290	5	195	138.131	30.126	40.305
NorthernBobwhite_SimpleContig_ 1727	14310	26554	13272	13282	10982	12382	813	2256	754.345	1185.86	7795	8	279	143.074	30.931	38.379
NorthernBobwhite_SimpleContig_ 1728	460	804	385	419	122	254	178	245	268.902	28.645	352	4	192	127.92	46.119	52.174
NorthernBobwhite_SimpleContig_ 1729	10324	18722	9349	9373	7788	8714	749	1384	680.939	1022.88	3234	0	246	139.815	27.899	39.074
NorthernBobwhite_SimpleContig_ 1730	5032	14034	6967	7067	5036	6764	957	1201	501.888	675.68	3020	9	301	194.913	31.719	55.922
NorthernBobwhite_SimpleContig_ 1731	382	6715	3490	3225	772	1610	1930	2362	268.197	28.831	2562	82	1683	1177.67	396.711	63.613
NorthernBobwhite_SimpleContig_ 1732	1536	3176	1567	1609	814	1336	388	625	274.803	32.605	870	9	219	149.872	31.216	48.503
NorthernBobwhite_SimpleContig_ 1733	6692	11118	5568	5550	4344	5116	735	882	527.546	782.527	3273	12	211	129.122	27.195	36.536
NorthernBobwhite_SimpleContig_ 1734	11768	22801	11297	11504	8484	11200	956	2036	618.378	964.137	6475	5	231	144.52	26.357	41.63
NorthernBobwhite_SimpleContig_ 1735	1831	3204	1607	1597	972	1504	302	413	277.35	33.211	719	7	189	132.746	27.617	39.159
NorthernBobwhite_SimpleContig_ 1736	5630	9360	4703	4657	3422	4388	594	921	490.079	753.674	2217	12	190	128.483	21.694	36.927
NorthernBobwhite_SimpleContig_ 1737	4326	7787	3853	3934	2794	3660	514	781	470.72	622.687	2265	8	250	136.45	33.115	37.933
NorthernBobwhite_SimpleContig_ 1738	1318	2823	1389	1434	752	1230	357	472	278.846	34.515	686	5	222	153.338	38.501	50.152
NorthernBobwhite_SimpleContig_ 1739	1097	1916	960	956	590	842	263	212	281.007	34.686	638	7	203	137.959	36.522	38.469
NorthernBobwhite_SimpleContig_ 1740	22309	46351	23261	23090	19186	21980	1018	3954	824.956	1212.57	13978	0	303	156.195	29.807	42.924
NorthernBobwhite_SimpleContig_ 1741	11173	23954	11975	11979	9446	11524	912	1932	730.325	1081.17	5456	7	239	155.563	27.136	46.836
NorthernBobwhite_SimpleContig_ 1742	7026	16102	8144	7958	6050	8010	653	1323	718.811	1072.26	4253	8	247	165.464	30.71	45.958
NorthernBobwhite_SimpleContig_ 1743	5624	10749	5457	5292	4116	5086	600	904	558.019	804.75	2452	4	223	144.287	30.526	41.607
NorthernBobwhite_SimpleContig_ 1744	7770	16383	8238	8145	6142	7868	833	1478	648.625	1012.23	3969	15	225	153.837	28.469	46.937
NorthernBobwhite_SimpleContig_ 1745	520	912	459	453	170	356	97	285	270.765	30.927	300	8	179	129.108	35.903	42.115
NorthernBobwhite_SimpleContig_ 1746	3016	7278	3604	3674	2354	3616	451	823	318.805	298.379	2005	2	261	164.085	54.83	59.284
NorthernBobwhite_SimpleContig_ 1747	1853	3103	1532	1571	1164	1240	296	387	277.297	34.687	1177	6	188	136.687	27.085	36.05
NorthernBobwhite_SimpleContig_ 1748	3018	5648	2767	2881	1958	2452	535	671	350.74	393.292	1102	6	229	142.325	30.831	38.9
NorthernBobwhite_SimpleContig_ 1749	15464	707701	352332	355369	304786	327708	16418	55309	711.203	1089.83	147098	0	5784	3577.37	717.232	37.603
NorthernBobwhite_SimpleContig_ 1750	2483	4351	2193	2158	1510	1878	425	519	283.286	104.13	1568	5	194	135.201	26.583	40.395
NorthernBobwhite_SimpleContig_ 1751	6401	11048	5566	5482	4344	5030	707	926	540.982	795.59	2960	5	203	133.144	23.915	38.244
NorthernBobwhite_SimpleContig_ 1752	9206	23950	11938	12012	9402	11416	1023	1985	718.646	1090.67	6519	12	266	187.424	28.535	49.696
NorthernBobwhite_SimpleContig_ 1753	313	2070	1062	1008	2	22	844	1190	294	0	1672	0	1902	381.342	643.728	47.284
NorthernBobwhite_SimpleContig_ 1754	10753	20686	10320	10366	8150	9724	772	1943	729.623	1100.69	6244	0	233	145.127	30.013	42.249
NorthernBobwhite_SimpleContig_ 1755	12367	21751	10871	10880	8998	10100	688	1867	701.694	1082.51	6505	11	239	136.161	24.008	37.988
NorthernBobwhite_SimpleContig_ 1756	10791	19741	9899	9842	7816	9364	525	1946	681.27	1012.37	5337	0	225	139.134	27.781	38.884
NorthernBobwhite_SimpleContig_ 1757	6668	9692	4852	4840	4140	4254	381	869	571.596	926.075	3568	2	192	116.542	25.114	33.188
NorthernBobwhite_SimpleContig_ 1758	12676	20837	10353	10484	8952	9842	481	1473	678.065	1042.43	4530	3	198	129.75	23.575	34.995
NorthernBobwhite_SimpleContig_ 1759	3147	5352	2595	2757	1984	2494	437	415	414.496	527.02	1607	1	199	131.986	32.744	37.814
NorthernBobwhite_SimpleContig_ 1760	2449	3997	2007	1990	1430	1760	331	461	279.715	83.875	1093	7	200	130.431	26.624	37.893
NorthernBobwhite_SimpleContig_ 1761	10234	21322	10688	10634	8220	10456	746	1810	720.507	1117.62	5972	3	227	154.753	25.709	43.258
NorthernBobwhite_SimpleContig_ 1762	27867	58137	29023	29114	23754	29172	863	4058	831.124	1200.54	14869	6	251	154.386	27.287	42.599
NorthernBobwhite_SimpleContig_ 1763	13153	29090	14428	14662	11240	14324	742	2633	695.502	1069.36	7976	8	244	161.168	27.781	46.811
NorthernBobwhite_SimpleContig_ 1764	5112	13370	6673	6697	4458	6684	863	1302	452.399	592.032	3672	8	282	179.316	44.381	55.692
NorthernBobwhite_SimpleContig_ 1765	3616	6092	3072	3020	2210	2736	465	654	419.529	533.751	1752	3	205	132.285	25.992	37.832
NorthernBobwhite_SimpleContig_ 1766	4562	8212	4117	4095	3068	3800	537	770	495.025	653.24	3048	3	220	137.446	31.238	38.799
NorthernBobwhite_SimpleContig_ 1767	812	1456	741	715	376	626	168	281	280.968	40.226	230	5	212	133.611	40.711	43.227
NorthernBobwhite_SimpleContig_ 1768	2868	5042	2521	2521	1634	2232	485	661	317.228	285.39	1525	1	234	133.535	31.524	41.109
NorthernBobwhite_SimpleContig_ 1769	1349	2668	1329	1339	904	1102	232	408	272.838	31.947	741	1	211	151.761	37.604	44.477
NorthernBobwhite_SimpleContig_ 1770	11540	21661	10785	10876	9186	10038	755	1569	698.47	1069.32	3898	6	244	145.342	26.18	39.021
NorthernBobwhite_SimpleContig_ 1771	19683	31564	15742	15822	14106	14454	400	2449	784.845	1229.65	7463	0	208	127.236	22.74	33.902
NorthernBobwhite_SimpleContig_ 1772	3441	8736	4332	4404	2788	4110	576	1216	389.117	482.755	2494	5	290	182.28	40.437	48.765
NorthernBobwhite_SimpleContig_ 1773	12941	25170	12635	12535	10636	11656	842	1901	785.148	1170.02	5887	9	243	146.427	25.88	40.638
NorthernBobwhite_SimpleContig_ 1774	2216	4172	2131	2041	1314	1900	451	485	276.187	33.102	1170	9	195	142.878	26.995	37.771
NorthernBobwhite_SimpleContig_ 1775	3309	8878	4530	4348	2676	4522	583	1054	390.127	481.315	2098	6	277	189.304	39.229	50.922
NorthernBobwhite_SimpleContig_ 1776	4503	7158	3607	3551	2718	3176	432	792	423.325	555.362	2356	7	178	124.487	23.103	38.774
NorthernBobwhite_SimpleContig_ 1777	309	518	250	268	34	142	144	196	252.412	17.188	83	6	201	123.256	54.618	36.246
NorthernBobwhite_SimpleContig_ 1778	458	1577	783	794	252	422	274	622	267.063	32.066	387	18	391	263.013	90.54	35.371
NorthernBobwhite_SimpleContig_ 1779	1000	5668	2805	2863	1592	2464	813	768	277.812	35.59	2279	21	624	422.6	121.311	42.5
NorthernBobwhite_SimpleContig_ 1780	7903	20305	10107	10198	7186	10482	677	1871	618.844	941.309	5097	5	263	179.666	30.185	53.663
NorthernBobwhite_SimpleContig_ 1781	4202	9241	4640	4601	2906	4668	616	1007	489.504	651.787	2403	5	224	151.98	30.139	51.666
NorthernBobwhite_SimpleContig_ 1782	8098	12135	6047	6088	5028	5520	450	1078	553.051	872.535	2895	5	188	120.188	22.489	33.243
NorthernBobwhite_SimpleContig_ 1783	343	341	163	178	22	104	150	64	256.455	16.367	70	2	109	69.35	28.314	50.146
NorthernBobwhite_SimpleContig_ 1784	11810	26845	13298	13547	10248	13396	878	2205	752.98	1105.8	7254	7	249	163.187	33.555	48.069
NorthernBobwhite_SimpleContig_ 1785	4394	8457	4252	4205	3176	3894	554	786	472.851	617.068	2749	3	233	147.511	30.069	41.102
NorthernBobwhite_SimpleContig_ 1786	2161	3394	1674	1720	1090	1624	351	315	279.752	34.327	1012	12	180	124.776	27.617	35.076
NorthernBobwhite_SimpleContig_ 1787	3355	1318	673	645	412	620	134	145	395.612	475.399	201	1	53	27.504	9.149	44.173
NorthernBobwhite_SimpleContig_ 1788	6746	1088420	543249	545171	386482	519430	48776	128273	609.636	913.208	401204	577	16241	11699.6	1744.75	47.658
NorthernBobwhite_SimpleContig_ 1789	408	540	325	215	90	150	81	217	266.756	27.863	150	1	184	102.027	52.414	42.892
NorthernBobwhite_SimpleContig_ 1790	8180	13786	6878	6908	5306	6470	495	1434	618.369	956.286	3839	0	217	127.055	28.667	39.425
NorthernBobwhite_SimpleContig_ 1791	3332	5872	2966	2906	2040	2804	470	521	369.138	449.259	1893	1	197	119.218	31.746	53.451
NorthernBobwhite_SimpleContig_ 1792	11550	25735	12795	12940	10266	12594	787	1970	731.227	1090.52	7307	6	250	162.948	27.573	47.082
NorthernBobwhite_SimpleContig_ 1793	2086	3653	1815	1838	1094	1564	474	509	278.801	36.194	1262	12	202	131.957	33.616	39.549
NorthernBobwhite_SimpleContig_ 1794	2757	4739	2404	2335	1664	2002	536	510	340.186	364.918	1602	8	183	133.458	26.692	37.142
NorthernBobwhite_SimpleContig_ 1795	6510	12552	6259	6293	4778	6030	545	1147	572.33	842.88	3741	6	226	145.616	30.855	40.538
NorthernBobwhite_SimpleContig_ 1796	7401	12798	6404	6394	5288	5850	641	956	587.205	887.798	2747	6	202	135.13	24.455	38.035
NorthernBobwhite_SimpleContig_ 1797	9240	14720	7345	7375	6062	6766	730	1100	630.474	973.701	2701	2	233	124.583	25.922	34.545
NorthernBobwhite_SimpleContig_ 1798	2545	5049	2509	2540	1612	2350	396	671	305.888	247.69	1844	6	246	147.099	35.94	41.375
NorthernBobwhite_SimpleContig_ 1799	1953	3925	1974	1951	1110	1776	446	573	277.987	34.88	1184	9	229	148.358	33.643	42.908
NorthernBobwhite_SimpleContig_ 1800	1377	2601	1340	1261	740	1060	344	448	278.392	33.224	727	4	192	141.45	32.303	43.863
NorthernBobwhite_SimpleContig_ 1801	10043	18526	9235	9291	7440	8816	671	1510	679.701	1051.55	5310	4	205	141.002	27.711	39.898
NorthernBobwhite_SimpleContig_ 1802	7746	17487	8800	8687	6496	8642	995	1296	618.208	883.713	5341	1	250	164.655	33.386	47.16
NorthernBobwhite_SimpleContig_ 1803	18770	31101	15500	15601	13326	14668	769	2181	679.885	1056.28	6541	5	207	130.221	23.095	35.376
NorthernBobwhite_SimpleContig_ 1804	2529	5201	2597	2604	1574	2112	636	846	281.518	74.002	1204	16	466	155.062	49.509	41.123
NorthernBobwhite_SimpleContig_ 1805	4759	10654	5318	5336	3714	5078	746	1066	444.681	572.457	2005	11	257	164.048	33.748	46.817
NorthernBobwhite_SimpleContig_ 1806	928	822	428	394	220	288	145	165	273.773	32.015	144	4	98	60.908	16.232	52.586
NorthernBobwhite_SimpleContig_ 1807	8993	14765	7392	7373	6268	6628	405	1404	684.888	1079.65	4925	7	190	130.538	21.968	36.451
NorthernBobwhite_SimpleContig_ 1808	2710	6016	2988	3028	1754	2678	647	912	311.527	260.139	1640	13	246	160.254	34.643	47.97
NorthernBobwhite_SimpleContig_ 1809	1525	2185	1071	1114	688	908	255	326	280.36	35.993	581	7	170	112.975	29.077	31.738
NorthernBobwhite_SimpleContig_ 1810	450	1611	871	740	122	232	664	589	274.328	38.306	807	5	967	231.569	252.624	44.667
NorthernBobwhite_SimpleContig_ 1811	1335	5321	2708	2613	662	938	1609	2074	275.317	34.02	2493	0	1648	243.851	362.202	57.678
NorthernBobwhite_SimpleContig_ 1812	5471	13135	6626	6509	5174	6044	802	1060	546.181	788.138	3321	5	274	180.589	36.113	46.335
NorthernBobwhite_SimpleContig_ 1813	11094	25393	12652	12741	9902	12424	821	2130	701.315	1055.36	8075	4	265	168.844	35.632	46.809
NorthernBobwhite_SimpleContig_ 1814	4494	12342	6193	6149	4086	6282	739	1166	431.226	557.456	3776	8	277	184.689	36.785	59.88
NorthernBobwhite_SimpleContig_ 1815	6249	14064	7020	7044	5022	6718	697	1549	532.324	762.688	4086	6	270	165.097	35.942	47.368
NorthernBobwhite_SimpleContig_ 1816	11433	21604	10805	10799	8832	10126	625	1897	727.213	1128.42	6732	4	257	144.705	29.412	40.838
NorthernBobwhite_SimpleContig_ 1817	9221	14096	7058	7038	5866	6526	370	1270	583.623	937.924	4392	8	186	121.291	21.233	32.806
NorthernBobwhite_SimpleContig_ 1818	10597	20013	10018	9995	8376	9246	801	1495	708.238	1065.97	3562	6	230	145.871	32.48	38.681
NorthernBobwhite_SimpleContig_ 1819	12025	5433	2712	2721	2364	2554	77	414	623.02	911.228	804	1	62	30.575	9.628	56.308
NorthernBobwhite_SimpleContig_ 1820	2947	6732	3327	3405	2082	3340	608	669	363.478	418.045	1971	1	252	165.62	41.703	46.386
NorthernBobwhite_SimpleContig_ 1821	7943	12762	6448	6314	4876	6260	488	1064	535.388	883.961	3539	2	235	124.823	35.174	38.864
NorthernBobwhite_SimpleContig_ 1822	7452	15184	7662	7522	5334	6724	1116	1914	603.642	917.302	3804	8	672	152.689	56.091	39.828
NorthernBobwhite_SimpleContig_ 1823	5477	8276	4177	4099	3210	3804	440	780	487.452	691.532	2122	6	181	119.949	23.694	34.38
NorthernBobwhite_SimpleContig_ 1824	13380	21341	10660	10681	8646	9648	647	2295	719.577	1099.75	6177	0	327	124.734	28.593	35.12
NorthernBobwhite_SimpleContig_ 1825	5402	2460	1222	1238	828	1268	90	255	605.389	908.308	380	1	53	29.141	8.792	56.424
NorthernBobwhite_SimpleContig_ 1826	11039	17911	8968	8943	7678	8338	565	1239	624.401	973.77	4898	3	212	128.423	22.774	36.407
NorthernBobwhite_SimpleContig_ 1827	4385	8059	4060	3999	2938	3700	621	760	506.592	674.468	2574	9	213	140.773	26.621	38.358
NorthernBobwhite_SimpleContig_ 1828	3023	7035	3504	3531	2290	3278	556	881	377.928	455.37	1931	15	270	161.29	50.826	53.721
NorthernBobwhite_SimpleContig_ 1829	7489	6471	3187	3284	2616	2924	395	508	619.892	880.421	1141	3	123	66.819	13.763	35.746
NorthernBobwhite_SimpleContig_ 1830	6190	11695	5834	5861	4474	5454	794	911	506.532	724.072	3190	10	213	144.414	23.498	38.966
NorthernBobwhite_SimpleContig_ 1831	23310	44137	22144	21993	18454	21486	763	3214	790.916	1182.07	9884	5	240	142.694	23.19	41.416
NorthernBobwhite_SimpleContig_ 1832	888	782	382	400	166	300	193	115	281.723	39.129	166	4	98	63.574	15.988	44.257
NorthernBobwhite_SimpleContig_ 1833	9702	18119	9059	9060	6850	8580	1096	1490	617.368	990.781	3897	1	248	141.742	32.606	39.043
NorthernBobwhite_SimpleContig_ 1834	8792	16313	8162	8151	6318	7850	729	1317	684.407	1032.12	4737	9	263	140.758	25.265	40.821
NorthernBobwhite_SimpleContig_ 1835	8873	21922	11002	10920	7916	11458	872	1558	593.928	918.439	3684	1	284	171.169	51.023	54.525
NorthernBobwhite_SimpleContig_ 1836	17647	32067	15983	16084	14016	14900	577	2444	791.018	1189.75	8061	0	229	142.038	29.459	37.746
NorthernBobwhite_SimpleContig_ 1837	6718	5914	2962	2952	2268	2780	328	505	558.728	828.869	1010	3	105	66.527	14.604	40.116
NorthernBobwhite_SimpleContig_ 1838	8125	14617	7213	7404	5804	6648	815	1278	610.791	924.339	4392	0	239	138.714	29.505	38.523
NorthernBobwhite_SimpleContig_ 1839	2573	5103	2569	2534	1670	2176	675	565	284.093	127.962	1768	0	235	149.557	41.152	39.72
NorthernBobwhite_SimpleContig_ 1840	2383	4991	2523	2468	1542	2190	640	594	275.331	33.615	1400	6	218	153.114	37.138	46.832
NorthernBobwhite_SimpleContig_ 1841	6341	13274	6690	6584	4866	6172	717	1454	593.283	866.361	3902	8	250	155.297	28.101	45.135
NorthernBobwhite_SimpleContig_ 1842	13411	24251	12008	12243	9730	11110	1125	2179	753.034	1168.84	4901	5	432	136.176	35.028	37.35
NorthernBobwhite_SimpleContig_ 1843	7339	12007	6051	5956	4828	5508	684	930	589.987	885.095	2947	1	202	125.857	27.93	37.389
NorthernBobwhite_SimpleContig_ 1844	1179	2090	1026	1064	616	906	352	209	276.568	34.396	486	2	223	131.766	46.182	41.645
NorthernBobwhite_SimpleContig_ 1845	2565	4700	2392	2308	1468	2160	615	444	318.36	285.02	1232	6	197	138.941	26.323	39.688
NorthernBobwhite_SimpleContig_ 1846	4109	7754	3986	3768	2774	3468	732	739	402.292	508.655	2013	4	212	145.358	25.089	39.207
NorthernBobwhite_SimpleContig_ 1847	12613	19128	9531	9597	7990	8794	616	1628	722.596	1151.9	6440	5	200	119.372	23.956	34.036
NorthernBobwhite_SimpleContig_ 1848	1357	1886	958	928	612	754	258	257	277.435	34.278	435	9	148	111.172	24.684	33.161
NorthernBobwhite_SimpleContig_ 1849	8228	16138	8084	8054	6258	7798	675	1332	660.338	983.021	4677	4	220	146.819	26.117	42.368
NorthernBobwhite_SimpleContig_ 1850	7041	13382	6625	6757	5326	6116	645	1223	627.053	950.278	4064	8	241	146.412	24.811	38.972
NorthernBobwhite_SimpleContig_ 1851	4706	9123	4579	4544	3252	4358	530	941	442.069	579.29	2159	7	238	147.737	31.602	40.268
NorthernBobwhite_SimpleContig_ 1852	11073	27214	13528	13686	10752	13426	893	2000	702.029	1061.93	7106	2	300	174.184	41.282	51.856
NorthernBobwhite_SimpleContig_ 1853	3037	5354	2692	2662	1842	2362	529	598	312.638	280.864	1664	6	206	137.632	27.216	37.339
NorthernBobwhite_SimpleContig_ 1854	1070	2185	1049	1136	594	884	328	365	272.704	33.824	918	5	210	148.39	37.864	52.617
NorthernBobwhite_SimpleContig_ 1855	1859	3928	1916	2012	1084	1816	344	673	277.07	33.227	1517	4	221	151.878	33.029	45.347
NorthernBobwhite_SimpleContig_ 1856	8749	18670	9282	9388	7256	8942	653	1735	662.998	999.386	5378	7	249	157.085	31.352	44.485
NorthernBobwhite_SimpleContig_ 1857	3805	8644	4380	4264	2734	4130	547	1175	459.018	603.291	2540	11	261	160.755	33.091	49.777
NorthernBobwhite_SimpleContig_ 1858	2599	6235	3123	3112	1734	3106	585	786	289.897	171.838	1714	12	262	168.248	39.743	51.327
NorthernBobwhite_SimpleContig_ 1859	408	307	173	134	66	62	123	55	272.273	30.043	54	3	85	58.755	19.298	40.196
NorthernBobwhite_SimpleContig_ 1860	7558	12247	6072	6175	4998	5606	588	995	617.429	910.031	3728	3	200	126.89	27.39	36.028
NorthernBobwhite_SimpleContig_ 1861	1166	82293	41067	41226	27256	36254	5024	13281	275.711	33.973	15702	357	6692	5642.62	1210.29	36.707
NorthernBobwhite_SimpleContig_ 1862	388	22376	10972	11404	3442	7022	4823	6978	267.148	28.208	4558	252	5948	4564.82	1575.59	38.918
NorthernBobwhite_SimpleContig_ 1863	10432	20751	10472	10279	8122	10090	643	1791	704.702	1069.14	4973	4	252	149.82	29.465	42.331
NorthernBobwhite_SimpleContig_ 1864	2782	6341	3186	3155	1986	3134	565	631	284.261	133.692	1628	2	254	161.065	38.206	51.725
NorthernBobwhite_SimpleContig_ 1865	8562	13430	6754	6676	5664	5926	447	1324	623.383	1002.05	3753	2	194	125.048	22.072	36.323
NorthernBobwhite_SimpleContig_ 1866	2220	4450	2231	2219	1340	1956	537	602	278.354	35.118	1102	9	198	147.505	28.567	44.459
NorthernBobwhite_SimpleContig_ 1867	6335	13945	7025	6920	4808	6918	828	1334	590.393	898.843	3251	6	275	158.894	33.781	46.614
NorthernBobwhite_SimpleContig_ 1868	707	1178	588	590	286	404	102	380	278.343	34.822	220	8	163	126.62	27.134	34.229
NorthernBobwhite_SimpleContig_ 1869	3899	7025	3573	3452	2792	3066	508	618	463.289	613.322	1382	1	215	138.547	30.77	39.292
NorthernBobwhite_SimpleContig_ 1870	6596	12288	6135	6153	4864	5668	511	1178	573.031	847.647	3353	4	211	142.025	27.761	40.509
NorthernBobwhite_SimpleContig_ 1871	18806	35389	17711	17678	14806	16848	771	2773	731.868	1120.85	8697	2	269	144.568	30.25	39.073
NorthernBobwhite_SimpleContig_ 1872	13583	28975	14443	14532	11076	14578	712	2489	724.995	1094.92	7405	9	249	158.295	28.172	44.718
NorthernBobwhite_SimpleContig_ 1873	4125	9781	4818	4963	3202	4734	521	1270	456.522	603.596	2973	2	259	162.231	34.369	57.212
NorthernBobwhite_SimpleContig_ 1874	1428	2335	1186	1149	688	952	305	383	275.366	33.295	692	4	174	124.333	25.672	36.415
NorthernBobwhite_SimpleContig_ 1875	1387	2540	1309	1231	680	1026	461	363	275.403	33.692	961	12	198	134.076	35.514	45.205
NorthernBobwhite_SimpleContig_ 1876	397	132870	65771	67099	7260	31454	6376	86927	262.247	25.327	76668	66	34330	21991.7	11640	51.889
NorthernBobwhite_SimpleContig_ 1877	6785	2747	1345	1402	1028	1286	135	282	468.214	671.44	418	3	63	27.23	8.599	53.648
NorthernBobwhite_SimpleContig_ 1878	2142	4790	2441	2349	1362	2220	615	565	277.37	33.964	1437	5	232	160.176	35.413	50.7
NorthernBobwhite_SimpleContig_ 1879	747	1550	800	750	348	642	202	356	279.132	33.475	589	5	199	155.831	39.166	46.319
NorthernBobwhite_SimpleContig_ 1880	4360	9415	4675	4740	3224	4518	692	931	469.547	631.874	2725	0	248	158.358	36.72	46.33
NorthernBobwhite_SimpleContig_ 1881	8954	14838	7428	7410	6030	6680	565	1492	720.879	1103.69	4615	0	190	127.889	26.402	37.67
NorthernBobwhite_SimpleContig_ 1882	23834	39587	19833	19754	17138	18740	515	2968	740.08	1146.77	9658	0	208	130.495	23.188	36.88
NorthernBobwhite_SimpleContig_ 1883	6113	11338	5574	5764	4436	5284	587	957	560.987	822.499	3117	8	205	142.626	24.678	42.058
NorthernBobwhite_SimpleContig_ 1884	4841	8807	4312	4495	3258	4062	613	830	478.269	644.927	2676	8	226	139.591	26.149	40.302
NorthernBobwhite_SimpleContig_ 1885	22293	42681	21342	21339	17938	20128	859	3540	799.771	1208.12	11108	0	243	144.926	29.208	40.964
NorthernBobwhite_SimpleContig_ 1886	2989	5487	2736	2751	1756	2300	597	813	377.317	458.273	1671	6	298	139.031	29.174	38.274
NorthernBobwhite_SimpleContig_ 1887	1267	2043	1004	1039	560	912	274	288	277.004	35.213	572	7	187	122.003	32.098	34.412
NorthernBobwhite_SimpleContig_ 1888	4137	8732	4301	4431	2986	4186	654	872	460.234	606.73	2545	5	241	154.032	32.878	44.839
NorthernBobwhite_SimpleContig_ 1889	2489	6050	2973	3077	1816	3094	478	633	286.095	123	1661	1	257	163	52.099	60.988
NorthernBobwhite_SimpleContig_ 1890	1350	2851	1399	1452	752	1300	385	396	276.17	34.503	1027	9	219	151.991	33.782	45.111
NorthernBobwhite_SimpleContig_ 1891	405	555	266	289	86	196	99	171	270.721	33.471	154	8	142	102.084	35.332	42.469
NorthernBobwhite_SimpleContig_ 1892	743	1149	575	574	258	448	206	232	276.295	33.447	554	13	189	122.981	35.116	34.993
NorthernBobwhite_SimpleContig_ 1893	2192	3622	1831	1791	1168	1590	384	470	277.796	35.508	1185	4	208	128.64	31.868	38.139
NorthernBobwhite_SimpleContig_ 1894	526	385	187	198	86	126	115	54	275.326	31.609	66	1	77	57.298	15.476	37.452
NorthernBobwhite_SimpleContig_ 1895	12832	12451	6191	6260	4898	5976	442	1085	763.568	1167.77	2277	0	128	73.114	14.112	40.625
NorthernBobwhite_SimpleContig_ 1896	20361	19397	9767	9630	8068	9096	401	1739	746.667	1153.98	3593	3	144	73.321	16.559	38.382
NorthernBobwhite_SimpleContig_ 1897	6224	11467	5834	5633	3746	4450	1204	2017	610.564	913.664	4609	0	1412	139.898	122.907	35.604
NorthernBobwhite_SimpleContig_ 1898	3786	6724	3339	3385	2468	2918	596	712	410.793	520.869	1688	0	213	137.568	26.155	39.805
NorthernBobwhite_SimpleContig_ 1899	4188	2154	1066	1088	766	1046	129	206	425.086	538.421	309	3	62	32.886	8.925	62.607
NorthernBobwhite_SimpleContig_ 1900	22898	39633	19853	19780	16690	19136	731	2880	795.598	1225.08	8053	0	242	131.373	28.798	39.34
NorthernBobwhite_SimpleContig_ 1901	19588	32068	16103	15965	14092	14620	658	2536	694.889	1090.47	9826	10	230	129.388	21.221	37.227
NorthernBobwhite_SimpleContig_ 1902	3488	7244	3610	3634	2418	3466	586	741	389.466	481.957	2430	11	219	156.03	27.062	42.001
NorthernBobwhite_SimpleContig_ 1903	3794	8290	4133	4157	2636	3980	683	950	413.719	531.416	2960	8	228	161.689	30.332	45.361
NorthernBobwhite_SimpleContig_ 1904	4161	8745	4316	4429	3030	3802	873	995	450.086	585.109	3082	0	265	157.992	40.499	44.196
NorthernBobwhite_SimpleContig_ 1905	1351	1949	979	970	700	818	150	267	278.123	34.544	325	2	166	119.845	30.346	29.682
NorthernBobwhite_SimpleContig_ 1906	318	3209	2285	924	2	62	338	2768	230	0	1776	0	1562	484.217	506.137	50.629
NorthernBobwhite_SimpleContig_ 1907	11040	23936	11824	12112	8772	11058	912	3065	770.12	1165.41	6080	6	1216	157.962	84.09	42.418
NorthernBobwhite_SimpleContig_ 1908	2078	3015	1520	1495	724	1080	436	764	279.79	34.947	1017	4	276	99.159	41.832	49.471
NorthernBobwhite_SimpleContig_ 1909	4734	8616	4243	4373	3218	3970	536	837	473.86	619.423	1946	7	232	140.21	27.798	39.459
NorthernBobwhite_SimpleContig_ 1910	584	790	434	356	152	278	111	248	277.789	33.445	132	9	146	104.466	28.026	33.733
NorthernBobwhite_SimpleContig_ 1911	4812	9322	4696	4626	3090	4414	727	1048	476.474	632.245	2828	0	262	142.469	35.147	42.373
NorthernBobwhite_SimpleContig_ 1912	11852	20292	10139	10153	8374	9586	690	1539	721.144	1145.75	5735	6	196	133.137	25.218	36.492
NorthernBobwhite_SimpleContig_ 1913	15566	30381	15281	15100	12718	14412	644	2448	770.837	1192.47	7917	8	242	147.547	24.537	40.833
NorthernBobwhite_SimpleContig_ 1914	3645	6854	3401	3453	2284	3080	659	808	392.573	491.502	1357	7	185	139.898	24.922	41.07
NorthernBobwhite_SimpleContig_ 1915	8187	16025	7991	8034	6204	7666	644	1436	613.863	954.155	4159	5	229	147.986	24.424	41.81
NorthernBobwhite_SimpleContig_ 1916	6408	14764	7348	7416	5076	7154	758	1709	671.647	1048.58	4617	9	241	163.188	28.127	49.064
NorthernBobwhite_SimpleContig_ 1917	9246	26190	13142	13048	9494	13322	857	2379	615.624	908.911	7297	8	309	198.438	33.514	54.618
NorthernBobwhite_SimpleContig_ 1918	7597	15048	7565	7483	5768	6866	755	1570	696.813	1108.79	4987	7	232	150.562	27.049	41.74
NorthernBobwhite_SimpleContig_ 1919	842	159061	75389	83672	28592	72540	10793	46273	273.899	33.14	27124	582	21146	12030.3	4971.46	57.363
NorthernBobwhite_SimpleContig_ 1920	32818	85690	42869	42821	34420	43604	748	6495	821.812	1227.77	19223	17	336	184.207	32.541	51.901
NorthernBobwhite_SimpleContig_ 1921	2872	5639	2841	2798	1864	2622	495	634	330.693	337.185	1752	2	205	145.442	27.613	44.533
NorthernBobwhite_SimpleContig_ 1922	353	230	128	102	34	54	76	66	262.941	22.566	48	3	77	49.997	18.334	34.844
NorthernBobwhite_SimpleContig_ 1923	365	583	291	292	44	178	130	230	266.636	28.649	196	5	187	100.879	42.739	62.74
NorthernBobwhite_SimpleContig_ 1924	605	758	349	409	162	266	128	200	275.309	32.928	280	4	152	96.759	30.112	28.76
NorthernBobwhite_SimpleContig_ 1925	8830	16848	8473	8375	6666	7948	664	1497	701.788	1124.47	4026	13	227	143.524	25.645	43.126
NorthernBobwhite_SimpleContig_ 1926	6105	11662	5871	5791	4436	5432	681	1054	535.043	790.755	3415	4	240	144.692	28.16	41.114
NorthernBobwhite_SimpleContig_ 1927	4382	7471	3734	3737	2750	3364	626	697	470.961	621.788	1850	2	212	132.299	27.176	37.357
NorthernBobwhite_SimpleContig_ 1928	306	72845	36809	36036	150	12064	9687	50573	240.587	16.447	24959	0	34778	17246.9	12928.7	43.464
NorthernBobwhite_SimpleContig_ 1929	1891	2773	1383	1390	966	1128	292	372	281.037	35.508	877	3	170	118.993	23.762	34.268
NorthernBobwhite_SimpleContig_ 1930	10168	20452	10227	10225	8394	9510	716	1740	724.435	1096.36	5126	6	230	153.47	26.453	41.65
NorthernBobwhite_SimpleContig_ 1931	9883	16850	8458	8392	7300	7718	527	1212	652.892	1004.31	3164	1	201	131.889	23.53	37.559
NorthernBobwhite_SimpleContig_ 1932	2321	4679	2303	2376	1268	2202	445	736	277.574	33.845	1333	6	214	147.638	31.046	43.903
NorthernBobwhite_SimpleContig_ 1933	2283	4888	2450	2438	1488	2284	469	623	277.142	34.971	1543	6	236	160.252	29.493	45.116
NorthernBobwhite_SimpleContig_ 1934	20550	34170	17094	17076	14900	16028	562	2498	774.739	1186.88	8643	0	231	131.25	24.973	36.491
NorthernBobwhite_SimpleContig_ 1935	614	788	382	406	134	250	175	222	273.403	28.227	303	1	166	94.031	36.504	35.342
NorthernBobwhite_SimpleContig_ 1936	11239	17887	8962	8925	7364	8480	577	1358	649.469	975.56	5532	7	206	124.96	22.53	35.564
NorthernBobwhite_SimpleContig_ 1937	4719	8078	4123	3955	3044	3584	501	906	421.309	537.903	2822	7	217	135.763	25.867	36.279
NorthernBobwhite_SimpleContig_ 1938	787	2149	1137	1012	492	968	209	468	279.5	36.477	512	7	277	193.714	58.131	50.445
NorthernBobwhite_SimpleContig_ 1939	7779	13556	6731	6825	5406	6074	709	1311	600.911	894.137	4379	0	218	135.376	27.163	37.486
NorthernBobwhite_SimpleContig_ 1940	3458	5680	2846	2834	1964	2506	548	634	347.997	382.517	1836	7	191	125.649	29.276	38.606
NorthernBobwhite_SimpleContig_ 1941	7030	14721	7325	7396	5690	7100	712	1149	627.145	1001.09	4311	6	244	154.989	28.713	43.883
NorthernBobwhite_SimpleContig_ 1942	9985	17484	8871	8613	7474	8060	459	1413	717.639	1113.05	4743	4	221	136.033	26.198	36.505
NorthernBobwhite_SimpleContig_ 1943	5116	11257	5632	5625	4202	5120	721	1150	531.811	711.939	2787	14	253	161.838	31.332	46.149
NorthernBobwhite_SimpleContig_ 1944	7716	14019	6994	7025	5260	6462	919	1298	518.951	752.883	2671	1	228	139.487	31.503	40.397
NorthernBobwhite_SimpleContig_ 1945	6023	10152	5081	5071	3878	4750	576	908	521.721	812.752	3127	7	196	131.593	25.696	34.833
NorthernBobwhite_SimpleContig_ 1946	369	30937	14634	16303	2200	7312	1398	19883	264.344	28.11	20540	261	9802	5979.33	2866.09	52.846
NorthernBobwhite_SimpleContig_ 1947	4609	8196	4133	4063	2924	3734	581	915	508.082	683.293	2393	11	199	135.978	25.006	41.072
NorthernBobwhite_SimpleContig_ 1948	7775	15295	7595	7700	5956	7372	665	1223	593.932	925.441	4747	5	216	151.065	27.783	41.723
NorthernBobwhite_SimpleContig_ 1949	870	2319	1167	1152	570	970	360	403	273.656	33.905	622	6	251	181.923	43.886	57.471
NorthernBobwhite_SimpleContig_ 1950	5343	9769	4925	4844	3594	4628	541	952	507.057	700.013	2898	7	205	140.742	26.285	38.05
NorthernBobwhite_SimpleContig_ 1951	6740	15083	7558	7525	5558	7282	766	1388	607.818	930.128	3993	11	253	165.46	32.915	45.104
NorthernBobwhite_SimpleContig_ 1952	22755	59845	29900	29945	23340	30640	882	4691	852.084	1247.03	14368	8	287	186.154	36.315	51.206
NorthernBobwhite_SimpleContig_ 1953	7384	13500	6731	6769	5368	6192	580	1283	641.244	983.034	4262	6	201	140.645	22.871	39.856
NorthernBobwhite_SimpleContig_ 1954	10109	15376	7628	7748	6794	6966	331	1219	621.102	976.619	4123	3	184	122.614	21.452	33.95
NorthernBobwhite_SimpleContig_ 1955	11346	28799	14476	14323	11134	14256	748	2498	734.101	1126.63	7577	12	268	183.103	30.294	49.921
NorthernBobwhite_SimpleContig_ 1956	2709	6758	3348	3410	1998	3150	688	885	307.015	238.918	1988	8	264	173.752	35.342	53.71
NorthernBobwhite_SimpleContig_ 1957	5859	11550	5778	5772	4410	5398	723	965	495.799	685.285	2595	7	235	149.624	31.116	41.406
NorthernBobwhite_SimpleContig_ 1958	2531	4813	2457	2356	1474	2206	582	526	287.97	143.824	843	4	195	141.412	27.002	41.762
NorthernBobwhite_SimpleContig_ 1959	520	1276	662	614	230	472	166	403	268.6	31.485	208	11	261	175.713	56.795	45.577
NorthernBobwhite_SimpleContig_ 1960	11580	22695	11364	11331	9310	10580	658	2028	638.488	984.339	6185	0	236	148.154	33.551	42.358
NorthernBobwhite_SimpleContig_ 1961	5841	9929	4969	4960	4000	4590	407	889	524.353	783.043	2952	1	199	133.009	25.432	38.093
NorthernBobwhite_SimpleContig_ 1962	12408	20263	10127	10136	8766	9370	649	1384	663.815	976.242	5188	4	228	129.045	24.205	36.573
NorthernBobwhite_SimpleContig_ 1963	29146	45745	22985	22760	20230	21192	773	3319	745.171	1149.5	8981	0	230	124.313	23.135	35.034
NorthernBobwhite_SimpleContig_ 1964	1133	38755	19192	19563	11450	15988	3355	7764	276.643	33.386	10703	111	3517	2615.74	632.558	40.424
NorthernBobwhite_SimpleContig_ 1965	9115	16091	8101	7990	6626	7542	657	1186	683.36	1027.27	3335	7	222	135.818	25.998	37.312
NorthernBobwhite_SimpleContig_ 1966	826	24833	12533	12300	5970	8844	3278	6642	275.252	33.646	9373	124	3197	2286.39	607.955	40.678
NorthernBobwhite_SimpleContig_ 1967	328	775	388	387	42	98	250	381	254.905	21.372	311	10	283	156.817	77.3	37.5
NorthernBobwhite_SimpleContig_ 1968	10374	18850	9394	9456	7750	8938	615	1444	739.131	1123.85	5308	6	230	139.013	32.079	38.963
NorthernBobwhite_SimpleContig_ 1969	4917	11005	5443	5562	4138	5324	602	887	449.521	582.504	2540	1	309	163.704	46.619	50.112
NorthernBobwhite_SimpleContig_ 1970	5722	17304	8622	8682	5984	8992	841	1403	475.526	663.212	4450	3	284	198.989	36.001	64.243
NorthernBobwhite_SimpleContig_ 1971	444	5008	2425	2583	392	1070	331	3189	270.602	31.193	2780	39	1386	750.52	311.323	49.55
NorthernBobwhite_SimpleContig_ 1972	9647	16590	8281	8309	7074	7498	423	1524	648.077	1012.92	4250	5	218	135.972	25.75	36.664
NorthernBobwhite_SimpleContig_ 1973	567	223	123	100	34	94	34	59	276.412	27.592	56	2	44	25.727	9.377	54.674
NorthernBobwhite_SimpleContig_ 1974	7739	15477	7763	7714	5760	7568	736	1337	623.397	978.121	4534	7	237	150.573	30.818	42.086
NorthernBobwhite_SimpleContig_ 1975	12794	27586	13719	13867	10918	13416	905	2220	763.274	1155.66	6692	5	246	159.306	27.652	44.888
NorthernBobwhite_SimpleContig_ 1976	3889	6023	2989	3034	2254	2712	436	594	395.547	496.312	2230	4	174	120.394	24.866	36.616
NorthernBobwhite_SimpleContig_ 1977	567	1153	613	540	256	478	103	311	273.906	31.453	225	5	236	150.212	56.139	41.799
NorthernBobwhite_SimpleContig_ 1978	2515	4114	2072	2042	1388	1744	399	559	303.452	225.969	912	6	172	125.695	24.664	36.262
NorthernBobwhite_SimpleContig_ 1979	7275	13809	6861	6948	4960	6720	664	1400	562.932	864.93	3134	10	230	142.146	25.465	41.485
NorthernBobwhite_SimpleContig_ 1980	5499	13923	6973	6950	4834	6808	832	1377	499.21	682.775	3619	8	260	178.361	32.851	52.628
NorthernBobwhite_SimpleContig_ 1981	4396	9508	4737	4771	3306	4494	890	774	456.987	598.692	3027	2	253	158.675	32.375	45.041
NorthernBobwhite_SimpleContig_ 1982	6672	10899	5440	5459	4466	4794	517	1068	530.179	787.622	3768	3	213	130.142	27.546	37.665
NorthernBobwhite_SimpleContig_ 1983	17649	30134	15044	15090	12144	14048	888	2921	662.403	1023.66	8322	0	225	131.531	28.535	38.042
NorthernBobwhite_SimpleContig_ 1984	648	1194	600	594	150	322	286	432	270.32	31.137	328	0	225	129.562	55.685	47.994
NorthernBobwhite_SimpleContig_ 1985	2390	4614	2334	2280	1384	2066	482	661	280.936	81.681	1027	6	229	143.474	34.238	40.921
NorthernBobwhite_SimpleContig_ 1986	15143	25494	12818	12676	10838	11908	728	1893	688.672	1072.95	7688	0	238	133.143	26.028	36.723
NorthernBobwhite_SimpleContig_ 1987	2404	4779	2388	2391	1518	2164	468	611	290.261	144.803	1223	7	247	148.141	35.166	43.261
NorthernBobwhite_SimpleContig_ 1988	4872	8532	4286	4246	3180	4120	493	681	436.059	569.475	2428	5	226	138.347	25.313	38.383
NorthernBobwhite_SimpleContig_ 1989	5326	8707	4315	4392	3556	3838	554	718	416.015	543.85	3028	1	196	130.427	28.236	36.237
NorthernBobwhite_SimpleContig_ 1990	8212	18541	9306	9235	6874	9170	689	1706	713.12	1068.09	5555	4	237	164.983	26.587	45.799
NorthernBobwhite_SimpleContig_ 1991	11893	22058	11107	10951	9058	10312	709	1865	754.416	1126.67	5820	0	237	140.09	27.585	41.503
NorthernBobwhite_SimpleContig_ 1992	3968	1485	761	724	564	662	133	122	360.755	419.609	223	1	52	27.033	9.988	43.019
NorthernBobwhite_SimpleContig_ 1993	4290	10390	5181	5209	3442	4706	814	1366	443.878	574.45	3774	10	267	165.852	35.788	57.552
NorthernBobwhite_SimpleContig_ 1994	5850	14924	7539	7385	4992	7588	667	1612	491.554	696.871	5219	11	276	174.139	35.898	57.487
NorthernBobwhite_SimpleContig_ 1995	8157	17079	8526	8553	6380	8342	625	1624	641.908	957.413	4902	7	228	152.329	31.023	46.206
NorthernBobwhite_SimpleContig_ 1996	1412	49581	24344	25237	15930	21078	6252	6082	277.797	34.697	11237	131	3326	2746.06	532.609	34.065
NorthernBobwhite_SimpleContig_ 1997	9294	381283	190452	190831	155934	183156	10914	29415	729.621	1101.01	78789	173	4609	3140.43	536.409	39.8
NorthernBobwhite_SimpleContig_ 1998	5535	15271	7628	7643	5176	7572	921	1529	482.696	646.668	3494	3	283	190.025	38.665	54.797
[truncated: 372,228+ more rows]

## Sheet: Set Summary
Table S13-B NB1.0 Simple De Novo Summary Stats
Scaffolded Contig Set	Contig Count	Min Contig Length (bp)	Max Contig Length (bp)	Mean Contig Length (bp)	Total Contig Length (bp)
N25	13370	11905	163812	19,486.50	260534466
N50	44290	6260	163812	11,764.66	521056601
N75	104442	2967	163812	7,483.40	781581170
All contigs	374224	215	163812	2,784.71	1042104872
Long contigs (> 5Kb)	60417	5000	163812	16,806.94	611193528
Short contigs (< 300bp)*	514	215	299	291.19	149670
*Note, the mapping back process causes some final contigs to be shorter than the specified minimum distance provided at the onset of de novo assembly.
